# Supplementary material for: DFT calculation-aided optimisation of a chiral phosphoric acid catalyst: case study of kinetic resolution of racemic secondary alcohols through lactonisation
Source: Royal Society of Chemistry journal article supplement (doi:10.1039/d4cy01029a), 2024-01-01
Supplement: d4cy01029a1.pdf [file d4cy01029a1.pdf]

## Electronic Supplementary Information

### DFT Calculation-Aided Optimisation of Chiral Phosphoric Acid Catalyst: Case Study of Kinetic Resolution of Racemic Secondary Alcohols through Lactonisation

Haiting Ye, Takuma Sato, Taishi Nakanishi, Shigetomo Ito, Shigenobu Umemiya,  
Masahiro Terada

e-mail: mterada@tohoku.ac.jp

Department of Chemistry, Graduate School of Science, Tohoku University,  
Aoba-ku, Sendai 980-8578, Japan.

#### Contents:

|                                                                                                                  |      |
|------------------------------------------------------------------------------------------------------------------|------|
| 1. General Information.....                                                                                      | S2   |
| 2. Preparation of Substrates.....                                                                                | S2   |
| 3. General Procedure of Kinetic Resolution and Determination of Absolute Configuration<br>.....                  | S3   |
| 4. Preparation of CPA Catalysts.....                                                                             | S10  |
| 5. References.....                                                                                               | S13  |
| 6. NMR Charts.....                                                                                               | S14  |
| 7. HPLC Charts.....                                                                                              | S31  |
| 8. DFT Calculation of Transition States of Model System.....                                                     | S41  |
| 9. DFT Calculation of BINOL- and SPINOL-derived CPA-Catalyzed Reactions.....                                     | S47  |
| 10. Structural Properties of CPAs Derived from BINOL and SPINOL Backbones.....                                   | S66  |
| 11. DFT Calculation of SPINOL-derived CPAs Having Bulky Substituents.....                                        | S67  |
| 12. DFT Calculation for Distortion Analysis of SPINOL-derived CPA ( <i>S</i> )-1bd in Transition States<br>..... | S106 |
| 13. Screening of CPA Candidates by Calculation and their Structural Properties.....                              | S114 |
| 14. Structural Properties of CPA Candidates in Transitions States.....                                           | S164 |
| 15. DFT Calculation of Cy-SPINOL-derived CPAs Having Bulky Substituents.....                                     | S167 |

## 1. General Information

All reactions were carried out under nitrogen atmosphere in flame-dried glassware. Dichloromethane (CH<sub>2</sub>Cl<sub>2</sub>) and toluene were supplied from KANTO Chemical Co., Inc. as “Dehydrated solvent system”. Other solvents and reagents were purchased from commercial suppliers and used without further purification. Purification of reaction products was carried out by flash column chromatography using silica gel 60 N (Merck 40-63 μm). Analytical thin layer chromatography (TLC) was performed on Merck precoated TLC plates (silica gel 60 GF 254, 0.25 mm). <sup>1</sup>H NMR spectra were recorded on a JEOL ECA-600 (600 MHz) spectrometer. Chemical shifts are reported in ppm from tetramethylsilane or solvent resonance as the internal standard (CDCl<sub>3</sub>: 7.26 ppm, TMS: 0.00 ppm). <sup>13</sup>C NMR spectra were recorded on a JEOL ECA-600 (151 MHz) spectrometer with complete proton decoupling. Chemical shifts are reported in ppm from the solvent resonance as the internal standard (CDCl<sub>3</sub>: 77.0 ppm). Infrared spectra were recorded on a JASCO FT/IR-4100 spectrometer. Melting point (mp) was measured by METTLER TOLEDO MP70. Chiral stationary phase HPLC analysis was performed on a Jasco LC-2000 Plus Series system with DAICEL chiral analytical column (4.6 mmΦ\* 250 mm length). Optical rotations were measured on a Jasco P-1020 digital polarimeter with a sodium lamp and reported as follows; [α]<sup>T</sup><sub>D</sub> (c = g/100 mL, solvent, % ee). High resolution mass spectra analysis was performed on a Bruker Daltonics solariX 9.4T FT-ICR-MS spectrometer and a JEOL JMST100GCV Time-of-Flight Mass Spectrometer at the Research and Analytical Center for Giant Molecules, Graduate School of Science, Tohoku University

## 2. Preparation of Substrates

The substrate methyl 4-hydroxy-4-phenylbutyrate was prepared according to the literature, and spectral data in agreement with the information reported in the literature.<sup>1</sup>

### Methyl 4-hydroxy-4-phenylbutanoate (**2b**)

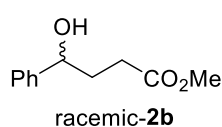

colorless oil;

<sup>1</sup>H-NMR (600 MHz, CDCl<sub>3</sub>) δ 7.35-7.34 (m, 4H), 7.30-7.27 (m, 1H), 4.75 (t, *J* = 8.0 Hz, 1H), 3.66 (s, 3H), 2.44 (t, *J* = 8.0 Hz, 2H), 2.31 (br, 1H), 2.09-2.06 (m, 2H); <sup>13</sup>C-NMR (151 MHz, CDCl<sub>3</sub>) δ 174.4, 144.1, 128.6, 127.8, 125.8, 73.6, 51.8, 33.9, 30.5; HPLC analysis Chiralpak IC-3 (Hexane/IPA = 92/8, 1.2 mL/min, 220 nm, 40 °C) (*S*)-**2b**: 11.6 min, (*R*)-**2b**: 16.0 min.



Crude NMR chart and HPLC chart of **2b** (71% ee)

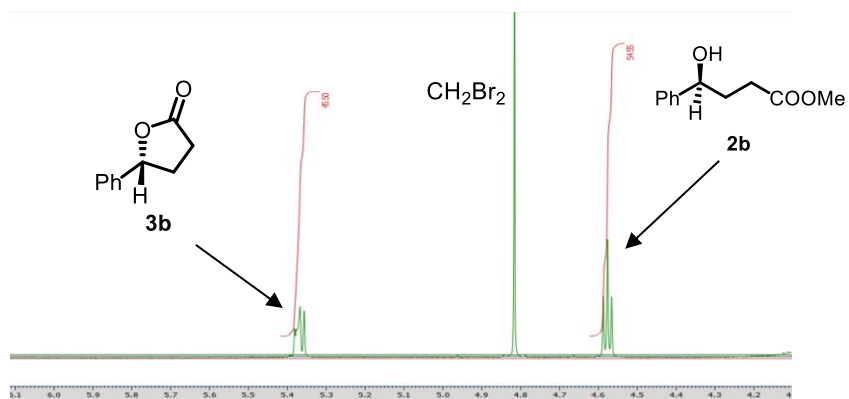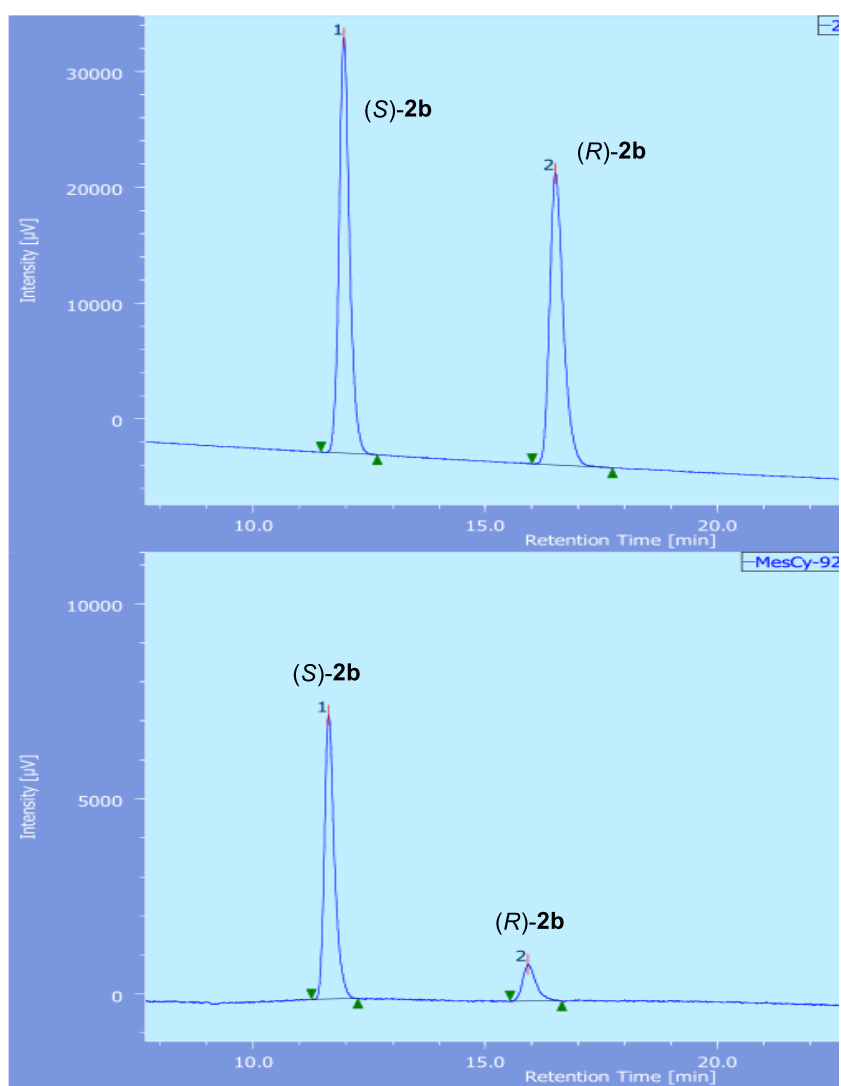

|                 | peak 1   | area 1 | peak 2   | area 2 |
|-----------------|----------|--------|----------|--------|
| <b>(rac)-2b</b> | 11.9 min | 50.9%  | 16.4 min | 49.1%  |
| <b>(S)-2b</b>   | 11.6 min | 85.3%  | 16.0 min | 14.7%  |

## Screening of reaction conditions using SPINOL-derived CPA (*S*)-1ba

Table S1<sup>a</sup>

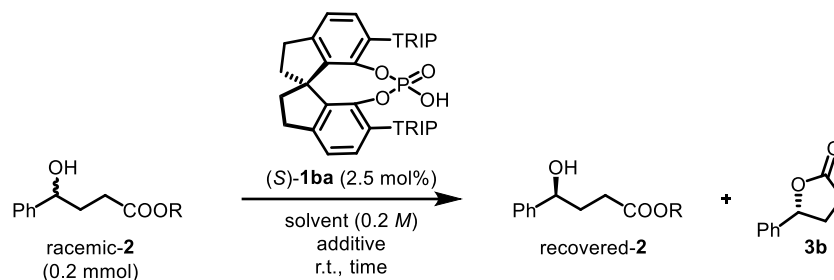

| Entry           | 2 (R)           | solvent                         | additive           | time   | conversion (%) <sup>b</sup> | ee of recovered-2 (ee %) | <i>s</i> -factor <sup>c</sup> |
|-----------------|-----------------|---------------------------------|--------------------|--------|-----------------------------|--------------------------|-------------------------------|
| 1               | <b>2b</b> (Me)  | CPME <sup>d</sup>               | -                  | 5 h    | 36                          | 33                       | 5.2                           |
| 2 <sup>e</sup>  | R = <i>i</i> Pr | CPME <sup>d</sup>               | -                  | 5.5 h  | 46                          | 22                       | 2.1                           |
| 3 <sup>e</sup>  | R = <i>t</i> Bu | CPME <sup>d</sup>               | -                  | 50 h   | 32                          | 9                        | 1.6                           |
| 4               | <b>2b</b> (Me)  | CH <sub>2</sub> Cl <sub>2</sub> | -                  | 35 min | 63                          | 72                       | 4.9                           |
| 5               | <b>2b</b> (Me)  | toluene                         | -                  | 45 min | 70                          | 73                       | 3.7                           |
| 6               | <b>2b</b> (Me)  | THF                             | -                  | 24 h   | 32                          | 31                       | 6.9                           |
| 7               | <b>2b</b> (Me)  | EtOAc                           | -                  | 5.5 h  | 57                          | 71                       | 7.0                           |
| 8               | <b>2b</b> (Me)  | MeCN                            | -                  | 2.5 h  | 52                          | 65                       | 7.6                           |
| 9               | R = Et          | MeCN                            | -                  | 4.5 h  | 51                          | 49                       | 4.3                           |
| 10              | <b>2b</b> (Me)  | MeCN                            | MeOH <sup>f</sup>  | 4.5 h  | 49                          | 49                       | 5.6                           |
| 11              | <b>2b</b> (Me)  | EtOAc                           | MS 5A <sup>g</sup> | 4.5 h  | 59                          | 79                       | 7.8                           |
| 12 <sup>h</sup> | <b>2b</b> (Me)  | EtOAc                           | -                  | 26 h   | 42                          | 22                       | 6.6                           |

<sup>a</sup> Unless otherwise noted, all reactions were conducted using 0.2 mmol of **2**, and 0.005 mmol (2.5 mol%) of (*S*)-1ba at room temperature in the indicated solvent (1 mL). <sup>b</sup> The conversion is determined by <sup>1</sup>H NMR analysis of the crude reaction mixture using CH<sub>2</sub>Br<sub>2</sub> as the internal standard. <sup>c</sup> The *s*-factor was calculated according to the conversion and ee value of recovered **2**,  $s = \ln[(1 - \text{Conv.})(1 - ee_{\text{substrate}})] / \ln[(1 - \text{Conv.})(1 + ee_{\text{substrate}})]$ . <sup>d</sup> CPME: cyclopentyl methyl ether. <sup>e</sup> At 50 °C. <sup>f</sup> 2.0 equiv. of MeOH was added. <sup>g</sup> 25 mg of MS 5A was added. <sup>h</sup> At 0 °C.

**Methyl 4-hydroxy-4-(naphthalen-1-yl)butanoate (2c)**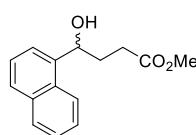

(290 mg, 12% yield) colorless oil; <sup>1</sup>H-NMR (600 MHz, CDCl<sub>3</sub>) δ 8.13 (d, *J* = 8.6 Hz, 1H), 7.87 (d, *J* = 8.6 Hz, 1H), 7.79 (d, *J* = 8.2 Hz, 1H), 7.68 (d, *J* = 6.9 Hz, 1H), 7.55-7.47 (m, 3H), 5.60-5.57 (m, 1H), 3.70 (s, 3H), 2.62 (dt, *J* = 16.8, 7.5 Hz, 1H), 2.52 (dt, *J* = 16.7, 6.7 Hz, 1H), 2.36-2.30 (m, 2H), 2.17-2.11 (m, 1H); <sup>13</sup>C-NMR (151 MHz, CDCl<sub>3</sub>) δ 174.6, 139.9, 133.9, 130.3, 129.0, 128.2, 126.3, 125.7, 125.5, 123.1, 122.8, 70.2, 51.8, 32.9, 30.5; IR (ATR) 3434, 2952, 2923, 1731, 1437, 1233, 1219, 1171, 1086, 778, 771 cm<sup>-1</sup>; HRMS (FD<sup>+</sup>) *m/z*: [M] Calcd for C<sub>15</sub>H<sub>16</sub>O<sub>3</sub> 244.10994, found: 244.10990.

**Methyl 4-hydroxy-4-(naphthalen-2-yl)butanoate (2d)**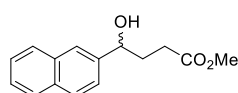

(512 mg, 21% yield) colorless oil; <sup>1</sup>H-NMR (600 MHz, CDCl<sub>3</sub>) δ 7.83-7.78 (m, 4H), 7.49-7.44 (m, 3H), 4.92-4.89 (m, 1H), 3.65 (s, 3H), 2.54-2.44 (m, 3H), 2.15 (q, *J* = 7.0 Hz, 2H); <sup>13</sup>C-NMR (151 MHz, CDCl<sub>3</sub>) δ 174.5, 141.5, 133.3, 133.1, 128.5, 128.0, 127.8, 126.3, 126.0, 124.6, 124.0, 73.7, 51.8, 33.7, 30.4; IR (ATR) 3434, 2951, 1732, 1437, 1236, 1168, 1084, 893, 858, 821, 769, 754 cm<sup>-1</sup>; HRMS (FD<sup>+</sup>) *m/z*: [M] Calcd for C<sub>15</sub>H<sub>16</sub>O<sub>3</sub> 244.10994, found: 244.10987.

**Methyl 4-hydroxy-4-(o-tolyl)butanoate (2e)**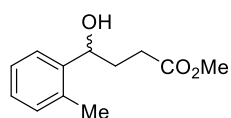

(210 mg, 10% yield) colorless oil; <sup>1</sup>H-NMR (600 MHz, CDCl<sub>3</sub>) δ 7.49 (d, *J* = 7.6 Hz, 1H), 7.23 (t, *J* = 7.4 Hz, 1H), 7.18 (td, *J* = 7.4, 1.4 Hz, 1H), 7.14 (d, *J* = 7.0 Hz, 1H), 5.02-4.99 (m, 1H), 3.68 (s, 3H), 2.57-2.46 (m, 2H), 2.34 (s, 3H), 2.09-1.96 (m, 3H); <sup>13</sup>C-NMR (151 MHz, CDCl<sub>3</sub>) δ 174.5, 142.3, 134.5, 130.5, 127.4, 126.4, 125.1, 69.9, 51.8, 32.6, 30.5, 19.0; IR (ATR) 3434, 2953, 1736, 1461, 1437, 1377, 1236, 1194, 1163, 1084, 922, 889, 757 cm<sup>-1</sup>; HRMS (FD<sup>+</sup>) *m/z*: [M] Calcd for C<sub>12</sub>H<sub>16</sub>O<sub>3</sub> 208.10994, found: 208.10987.

**Methyl 4-hydroxy-4-(2-isopropylphenyl)butanoate (2f)**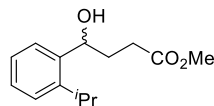

(186 mg, 8% yield) colorless oil; <sup>1</sup>H-NMR (600 MHz, CDCl<sub>3</sub>) δ 7.48 (dd, *J* = 7.6, 1.4 Hz, 1H), 7.29-7.22 (m, 2H), 7.21 (td, *J* = 7.3, 1.5 Hz, 1H), 5.13-5.09 (m, 1H), 3.68 (s, 3H), 3.21 (sept, *J* = 6.5 Hz, 1H), 2.57-2.47 (m, 2H), 2.05-2.00 (m, 3H), 1.24 (d, *J* = 6.5, 3H), 1.23 (d, *J* = 6.5, 3H); <sup>13</sup>C-NMR (151 MHz, CDCl<sub>3</sub>) δ 174.4, 145.5, 140.8, 127.9, 126.1, 125.5, 125.4, 69.2, 51.8, 33.6, 30.7, 28.1, 24.7, 23.9; IR (ATR): 3467, 2964, 2927, 1736, 1437, 1235, 1088, 880 cm<sup>-1</sup>; HRMS (FD<sup>+</sup>) *m/z*: [M] Calcd for C<sub>14</sub>H<sub>20</sub>O<sub>3</sub> 236.14124, found: 236.14117.

**Methyl 4-hydroxy-4-(2-methoxyphenyl)butanoate (2g)**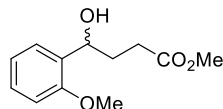

(125 mg, 6% yield) colorless oil; <sup>1</sup>H-NMR (600 MHz, CDCl<sub>3</sub>) δ 7.32 (dd, *J* = 7.4, 1.5 Hz, 1H), 7.26-7.23 (m, 1H), 6.96 (td, *J* = 7.5, 0.9 Hz, 1H), 6.87 (d, *J* = 8.2 Hz, 1H), 4.92-4.89 (m, 1H), 3.85 (s, 3H), 3.66 (s, 3H), 2.84 (d, *J* = 5.8 Hz, 1H), 2.52-2.40 (m, 2H), 2.17-2.06 (m, 2H); <sup>13</sup>C-NMR (151 MHz, CDCl<sub>3</sub>) δ 174.6, 156.5, 131.7, 128.6, 127.0, 120.9, 110.5, 70.4, 55.3, 51.7, 32.1, 30.8; IR (ATR) 3444, 2922, 1735, 1491, 1438, 1238, 1086, 884, 756 cm<sup>-1</sup>; HRMS (FD<sup>+</sup>) *m/z*: [M] Calcd for C<sub>12</sub>H<sub>16</sub>O<sub>4</sub> 224.10486, found: 224.10482.

**(S)-Methyl 4-hydroxy-4-(naphthalen-1-yl)butanoate ((S)-2c)**

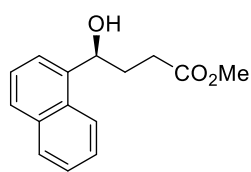

(22.5 mg, 46% recovered <51% conversion>,  $s = 15.3$ ) colorless oil;  
[ $\alpha$ ]<sup>24.1</sup><sub>D</sub> = -52.6 ( $c = 1.1$  in CHCl<sub>3</sub>, ee: 77%); HPLC analysis Chiralpak IC-3  
(Hexane/IPA = 92/8, 1.2 mL/min, 254 nm, 30 °C) 11.6 min (major-*S*), 24.9  
min (minor-*R*).

**(S)-Methyl 4-hydroxy-4-(naphthalen-2-yl)butanoate ((S)-2d)**

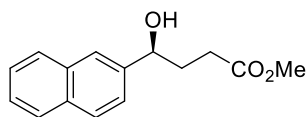

(20.5 mg, 42% recovered <56% conversion>,  $s = 9.2$ ) colorless oil;  
[ $\alpha$ ]<sup>22.6</sup><sub>D</sub> = -31.4 ( $c = 1.19$  in CHCl<sub>3</sub>, ee: 77%); HPLC analysis Chiralpak  
IC-3 (Hexane/IPA = 92/8, 1.2 mL/min, 220 nm, 30 °C) 14.6 min (major-*S*),  
18.6 min (minor-*R*).

**(S)-Methyl 4-hydroxy-4-(*o*-tolyl)butanoate ((S)-2e)**

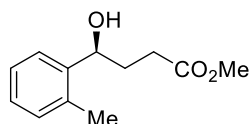

(18.7 mg, 45% recovered <53% conversion>,  $s = 14.1$ ) colorless oil;  
[ $\alpha$ ]<sup>22.5</sup><sub>D</sub> = -61.4 ( $c = 0.93$  in CHCl<sub>3</sub>, ee: 80%); HPLC analysis Chiralpak IC-3  
(Hexane/IPA = 92/8, 1.2 mL/min, 220 nm, 30 °C) 10.0 min (major-*S*), 15.7  
min (minor-*R*).

**(S)-Methyl 4-hydroxy-4-(2-isopropylphenyl)butanoate ((S)-2f)**

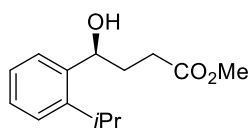

(18.2 mg, 38% recovered <57% conversion>,  $s = 20.2$ ) colorless oil;  
[ $\alpha$ ]<sup>22.5</sup><sub>D</sub> = -62.1 ( $c = 0.90$  in CHCl<sub>3</sub>, ee: 94%); HPLC analysis Chiralpak IC-3  
(Hexane/IPA = 80/20, 1.0 mL/min, 220 nm, 30 °C) 5.6 min (major-*S*), 10.4  
min (minor-*R*).

**(S)-Methyl 4-hydroxy-4-(2-methoxyphenyl)butanoate ((S)-2g)**

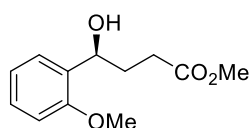

(14.6 mg, 35% recovered <62% conversion>,  $s = 15.5$ ) colorless oil;  
[ $\alpha$ ]<sup>22.5</sup><sub>D</sub> = -65.9 ( $c = 0.85$  in CHCl<sub>3</sub>, ee: 97%); HPLC analysis Chiralpak IC-3  
(Hexane/IPA = 80/20, 1.0 mL/min, 220 nm, 30 °C) 11.9 min (major-*S*), 14.6  
min (minor-*R*).

**(R)-5-(Naphthalen-1-yl)dihydrofuran-2(3H)-one ((R)-3c)**

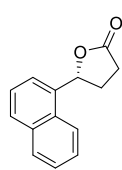

(14.0 mg, 33% isolated yield) colorless oil;  $[\alpha]^{24.1}_D = 99.3$  ( $c = 0.71$  in  $\text{CHCl}_3$ , ee: 71%); HPLC analysis Chiralpak IC-3 (Hexane/IPA = 92/8, 0.9 mL/min, 254 nm, 40 °C) 12.0 min (major-*R*), 12.7 min (minor-*S*);  $^1\text{H-NMR}$  (600 MHz,  $\text{CDCl}_3$ )  $\delta$  7.92-7.91 (m, 1H), 7.85 (d,  $J = 8.4$  Hz, 1H), 7.84 (d,  $J = 8.4$  Hz, 1H), 7.58-7.52 (m, 3H), 7.49 (t,  $J = 7.7$  Hz, 1H), 6.27 (t,  $J = 7.0$  Hz, 1H), 2.93-2.87 (m, 1H), 2.74-2.63 (m, 2H), 2.33-2.27 (m, 1H);  $^{13}\text{C-NMR}$  (151 MHz,  $\text{CDCl}_3$ )  $\delta$  177.2, 135.1, 133.9, 129.6, 129.3, 128.9, 126.7, 126.1, 125.5, 122.6, 121.7, 78.7, 30.1, 28.4; IR (ATR) 2924, 1774, 1219, 1184, 1162, 1054, 987, 930  $\text{cm}^{-1}$ ; HRMS (FD+)  $m/z$ : [M] Calcd for  $\text{C}_{14}\text{H}_{12}\text{O}_2$  212.08373, found: 212.08373.

**(R)-5-(Naphthalen-2-yl)dihydrofuran-2(3H)-one ((R)-3d)**

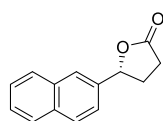

(19.9 mg, 47% isolated yield) white solid;  $[\alpha]^{22.8}_D = 9.8$  ( $c = 1.05$  in  $\text{CHCl}_3$ , ee: 60%); HPLC analysis Chiralpak AS-H (Hexane/IPA = 92/8, 1.2 mL/min, 220 nm, 40 °C) 21.2 min (major-*R*), 28.9 min (minor-*S*);  $^1\text{H-NMR}$  (600 MHz,  $\text{CDCl}_3$ )  $\delta$  7.89 (d,  $J = 8.6$  Hz, 1H), 7.87-7.83 (m, 2H), 7.82 (s, 1H), 7.54-7.50 (m, 2H), 7.41 (dd,  $J = 8.4, 1.9$  Hz, 1H), 5.70 (t,  $J = 7.2$  Hz, 1H), 2.78-2.69 (m, 3H), 2.32-2.26 (m, 1H);  $^{13}\text{C-NMR}$  (151 MHz,  $\text{CDCl}_3$ )  $\delta$  177.1, 136.8, 133.2, 133.1, 128.9, 128.1, 127.8, 126.7, 126.6, 124.3, 122.9, 81.4, 31.0, 29.0; IR (ATR) 2923, 1767, 1190, 1087, 1017, 934, 905, 758  $\text{cm}^{-1}$ ; HRMS (FD+)  $m/z$ : [M] Calcd for  $\text{C}_{14}\text{H}_{12}\text{O}_2$  212.08373, found: 212.08369; m.p.: 120.5 °C.

**(R)-5-(*o*-Tolyl)dihydrofuran-2(3H)-one ((R)-3e)**

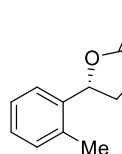

(17.8 mg, 50% isolated yield) white solid;  $[\alpha]^{24.1}_D = 25.6$  ( $c = 0.94$  in  $\text{CHCl}_3$ , ee: 71%); HPLC analysis Chiralpak IC-3 (Hexane/IPA = 92/8, 1.2 mL/min, 220 nm, 40 °C) 22.3 min (major-*R*), 26.3 min (minor-*S*);  $^1\text{H-NMR}$  (600 MHz,  $\text{CDCl}_3$ )  $\delta$  7.49 (d,  $J = 7.6$  Hz, 1H), 7.23 (t,  $J = 7.4$  Hz, 1H), 7.18 (td,  $J = 7.4, 1.4$  Hz, 1H), 7.14 (d,  $J = 7.0$  Hz, 1H), 5.02-4.99 (m, 1H), 3.64-3.72 (3H), 2.57-2.46 (m, 2H), 2.34 (s, 3H), 2.09-1.96 (m, 3H);  $^{13}\text{C-NMR}$  (151 MHz,  $\text{CDCl}_3$ )  $\delta$  177.2, 137.6, 134.3, 130.8, 128.3, 126.5, 124.3, 79.0, 29.7, 28.8, 19.1; IR (ATR) 2921, 1772, 1493, 1464, 1245, 1143, 1087, 1028, 935, 890, 756  $\text{cm}^{-1}$ ; HRMS (FD+)  $m/z$ : [M] Calcd for  $\text{C}_{11}\text{H}_{12}\text{O}_2$  176.08373, found: 176.08365; m.p.: 61.0 °C.

**(R)-5-(2-Isopropylphenyl)dihydrofuran-2(3H)-one ((R)-3f)**

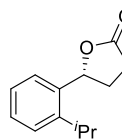

(25.2 mg, 62% isolated yield) colorless oil;  $[\alpha]^{24.1}_D = 24.2$  ( $c = 1.21$  in  $\text{CHCl}_3$ , ee: 65.5%); HPLC analysis Chiralpak IC-3 (Hexane/IPA = 80/20, 1.0 mL/min, 220 nm, 30 °C) 12.6 min (major-*R*), 15.2 min (minor-*S*);  $^1\text{H-NMR}$  (600 MHz,  $\text{CDCl}_3$ )  $\delta$  7.36-7.30 (m, 3H), 7.25-7.21 (m, 1H), 5.84 (t,  $J = 7.0$  Hz, 1H), 3.06 (sept,  $J = 6.8$  Hz, 1H), 2.70-2.63 (m, 3H), 2.08-2.21 (m, 1H), 1.27 (d,  $J = 6.8$  Hz, 3H), 1.26 (d,  $J = 6.8$  Hz, 3H);  $^{13}\text{C-NMR}$  (151 MHz,  $\text{CDCl}_3$ )  $\delta$  177.2, 145.4, 136.1, 128.6, 126.3, 125.8, 124.5, 78.5, 31.0, 29.0, 28.7, 24.3, 24.0; IR (ATR): 2965, 1779, 1177, 1087, 1022, 934, 886, 766, 753  $\text{cm}^{-1}$ ; HRMS (FD+)  $m/z$ : [M] Calcd for  $\text{C}_{13}\text{H}_{16}\text{O}_2$  204.11503, found: 204.11493.

**(R)-5-(2-Methoxyphenyl)dihydrofuran-2(3H)-one ((R)-3g)**

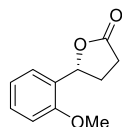

(18.2 mg, 48% isolated yield) colorless oil;  $[\alpha]^{24.1}_D = 45.1$  ( $c = 0.71$  in  $\text{CHCl}_3$ , ee: 60%); HPLC analysis Chiralpak IC-3 (Hexane/IPA = 80/20, 1.0 mL/min, 220 nm, 30 °C) 19.9 min (major-*R*), 22.3 min (minor-*S*);  $^1\text{H-NMR}$  (600 MHz,  $\text{CDCl}_3$ )  $\delta$  7.35-7.29 (m, 2H), 6.98 (td,



$J = 7.6, 1.0$  Hz, 1H), 6.90 (d,  $J = 8.2$  Hz, 1H), 5.76 (t,  $J = 7.2$  Hz, 1H), 3.85 (s, 3H), 2.73-2.68 (m, 1H), 2.65-2.60 (m, 2H), 2.15-2.09 (m, 1H);  $^{13}\text{C}$ -NMR (151 MHz,  $\text{CDCl}_3$ )  $\delta$  177.7, 156.1, 129.4, 128.1, 125.7, 120.7, 110.6, 78.0, 55.5, 29.4, 28.7; IR (ATR) 2955, 2923, 1775, 1461, 1216, 1189, 1175, 1143, 1023, 935, 756  $\text{cm}^{-1}$ ; HRMS (FD+)  $m/z$ : [M] Calcd for  $\text{C}_{11}\text{H}_{12}\text{O}_3$  192.07864, found: 192.07859.

## 4. Preparation of CPA Catalysts

The catalyst (*S*)-**1ga** was prepared according to the literature.<sup>3</sup>

### Synthesis of Cy-SPINOL-derived CPA (*S*)-**1ga**

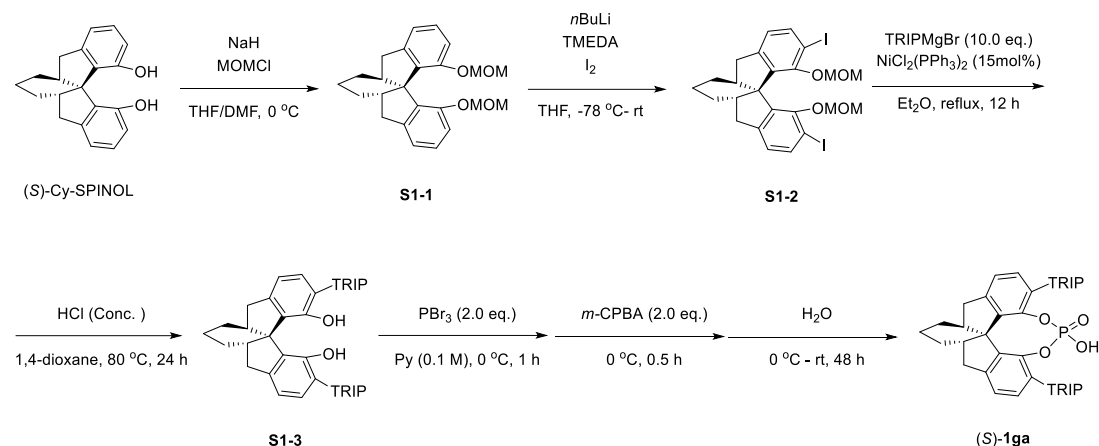

### (5*aS*,8*aS*)-1,13-bis(methoxymethoxy)-5*a*,6,7,8,8*a*,9-hexahydro-5*H*-indeno[2,1-*d*]fluorene (**S1-1**)

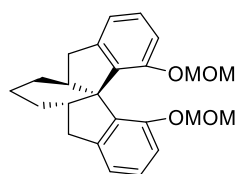

Starting material (*S*)-Cy-SPINOL was prepared according to the literature, and spectral data was reported.<sup>4</sup>

To a cooled (0 °C, ice/water bath) (*S*)-Cy-SPINOL (1.46 g, 5.0 mmol, 1.0 equiv.) in THF/DMF (30 mL/10 mL) was added NaH (60% w/w dispersion in mineral oils, 600 mg, 15 mmol, 3.0 equiv.). The resultant mixture was stirred at ambient temperature for 2 h. The mixture was then cooled back to 0 °C, and MOMCl (1.13 mL, 15.0 mmol, 3.0 equiv.) was added dropwise via syringe. The resultant mixture was stirred at ambient temperature for 6 h. Upon completion, the mixture was quenched with water (10 mL) and extracted with ethyl acetate (20 mL \* 3). The combined organic extracts were dried over anhydrous Na<sub>2</sub>SO<sub>4</sub>, filtered, and liberated of solvents in vacuo. The crude residue was purified by flash chromatography on silica gel (*n*-hexane/EtOAc 10:1), and **S1-1** was obtained as colorless oil in 85% yield (1.61 g). <sup>1</sup>H-NMR (600 MHz, CDCl<sub>3</sub>); δ 7.07 (t, *J* = 7.7 Hz, 2H), 6.90 (d, *J* = 7.7 Hz, 2H), 6.74 (d, *J* = 7.7 Hz, 2H), 4.74 (d, *J* = 6.5 Hz, 2H), 4.69 (d, *J* = 6.5 Hz, 2H), 3.12 (dd, *J* = 15.3, 7.2 Hz, 2H), 3.07 (s, 6H), 3.02-2.98 (m, 2H), 2.76 (dd, *J* = 14.9, 6.7 Hz, 2H), 1.62-1.53 (m, 4H), 1.49-1.45 (m, 2H); <sup>13</sup>C-NMR (151 MHz, CDCl<sub>3</sub>) δ 154.4 (2C), 147.1 (2C), 136.3 (2C), 127.6 (2C), 118.5 (2C), 112.6 (2C), 93.9 (2C), 61.8 (2C), 55.6 (2C), 43.1, 38.1 (2C), 27.0 (2C), 18.4; IR (ATR) 2922 1586, 1473, 1250, 1151, 1086, 1051, 955, 922, 871, 773 cm<sup>-1</sup>; [α]<sub>D</sub><sup>22.4</sup> = 90.1 (c=3.2 in CHCl<sub>3</sub>, ee >99%).

### (5*aS*,8*aS*)-2,12-diiodo-1,13-bis(methoxymethoxy)-5*a*,6,7,8,8*a*,9-hexahydro-5*H*-indeno[2,1-*d*]fluorene (**S1-2**)

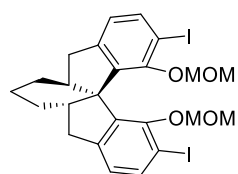

To a cooled (0 °C) solution of **S1-1** (1.52 g, 4.0 mmol, 1.0 equiv.) and freshly distilled TMEDA (1.49 mL, 10.0 mmol, 2.5 equiv.) in anhydrous Et<sub>2</sub>O (20 mL) was added *n*-BuLi (1.55 M solution in hexanes, 7.75 mL, 15.0 mmol, 3.0 equiv.) dropwise via syringe. The resultant mixture was stirred at ambient temperature for 12 h, and then was cooled down to -78 °C (dry ice/acetone bath). A solution of I<sub>2</sub> (3.15 g, 12.4 mmol, 3.1 equiv.) in anhydrous THF (4 mL) was slowly added. The reaction was allowed to slowly warm to ambient temperature and stirred for overnight. Upon completion, the solution was cooled down to 0 °C and the saturated aqueous Na<sub>2</sub>S<sub>2</sub>O<sub>3</sub> was added to quench the reaction. The

layers were separated, and the aqueous layer was extracted with ethyl acetate (20 mL\*3). The combined organic layers were dried over anhydrous Na<sub>2</sub>SO<sub>4</sub>, filtered and concentrated under reduced pressure. The crude residue was purified by flash chromatography on silica gel (hexane/ethyl acetate from 100:0 to 90:10) and **S1-2** was obtained as yellow powder in 81% yield (2.05 g).

<sup>1</sup>H-NMR (600 MHz, CDCl<sub>3</sub>) δ 7.66 (d, *J* = 7.7 Hz, 2H), 6.82 (d, *J* = 7.7 Hz, 2H), 4.66 (d, *J* = 4.8 Hz, 2H), 4.00 (d, *J* = 4.8 Hz, 2H), 3.22-3.17 (m, 8H), 3.01-2.97 (m, 2H), 2.70 (dd, *J* = 15.5, 6.9 Hz, 2H), 1.54-1.46 (m, 4H), 1.38-1.34 (m, 2H); <sup>13</sup>C-NMR (151 MHz, CDCl<sub>3</sub>) δ 153.7 (2C), 148.1 (2C), 142.2 (2C), 139.0 (2C), 123.6 (2C), 99.6 (2C), 90.0 (2C), 63.4 (2C), 58.0 (2C), 43.6, 37.4 (2C), 26.7 (2C), 18.0; HRMS (FD+) *m/z*: [M] Calcd for C<sub>24</sub>H<sub>26</sub>I<sub>2</sub>O<sub>4</sub> 631.99205, found: 631.99195; IR (ATR) 3481, 2924, 2848, 1561, 1434, 1388, 1218, 1159, 1087, 1049, 1017, 993, 919, 827, 671 cm<sup>-1</sup>; [α]<sub>D</sub><sup>21.9</sup> = -57.6 (c=1.9 in CHCl<sub>3</sub>, ee >99%); m.p.: 114 °C.

**(5a*S*,8a*S*)-2,12-bis(2,4,6-triisopropylphenyl)-5a,6,7,8,8a,9-hexahydro-5H-indeno[2,1-*d*]fluorene-1,13-diol (**S1-3**)**

The Grignard solution (TRIPMgBr (0.60 M in Et<sub>2</sub>O)) was prepared followed by above procedure.<sup>4</sup>

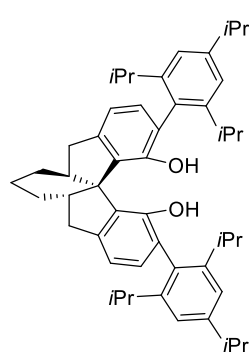

To the solution of **S1-2** (948 mg, 1.5 mmol, 1.0 equiv.) and NiCl<sub>2</sub>(PPh<sub>3</sub>)<sub>2</sub> (148 mg, 0.225 mmol, 15 mol%) in anhydrous Et<sub>2</sub>O (7.5 mL) was slowly added the TRIPMgBr solution (*ca.* 25 mL, 15 mmol, 10.0 equiv.). The solution was heated at reflux for 24 h, and cooled to 0 °C, quenched with saturated aqueous NH<sub>4</sub>Cl. The aqueous layer was extracted with ethyl acetate (30 mL\*3), and the combined organic extracts were dried over anhydrous Na<sub>2</sub>SO<sub>4</sub>, filtered and concentrated in vacuo. The crude product was used for next step without further purification.

To a solution of the above crude product in 1,4-dioxane (10 mL) was slowly added an aqueous solution of HCl (12.0 *N*, 2 mL). The mixture was stirred at 80 °C for 12 h before it was cooled to room temperature. Water was added, and the resulting mixture was extracted with dichloromethane (30 mL \* 3). the combined organic extracts were dried over anhydrous Na<sub>2</sub>SO<sub>4</sub>, filtered and concentrated in vacuo. The residue was purified by silica gel flash chromatography (hexanes/ethyl acetate = 50:1). The desired product **S1-3** was obtained as white solid in 37% yield (390 mg).

<sup>1</sup>H-NMR (600 MHz, CDCl<sub>3</sub>) δ 7.07 (d, *J* = 1.7 Hz, 2H), 7.04 (d, *J* = 1.7 Hz, 2H), 6.87 (d, *J* = 7.6 Hz, 2H), 6.85 (d, *J* = 7.6 Hz, 2H), 4.72 (s, 2H), 3.16-3.10 (m, 4H), 2.94-2.87 (m, 2H), 2.82-2.77 (m, 2H), 2.66-2.55 (m, 4H), 1.57-1.53 (m, 4H), 1.26 (d, *J* = 6.4 Hz, 12H), 1.13 (d, *J* = 6.9 Hz, 6H), 1.06 (d, *J* = 6.9 Hz, 6H), 1.03 (d, *J* = 6.9 Hz, 6H), 0.96 (d, *J* = 6.9 Hz, 6H); <sup>13</sup>C-NMR (151 MHz, CDCl<sub>3</sub>) δ 151.1 (2C), 148.8 (2C), 148.2 (2C), 148.1 (2C), 145.4 (2C), 131.2 (2C), 130.6 (2C), 129.8 (2C), 125.2 (2C), 121.3 (2C), 121.1 (2C), 117.2 (2C), 61.6 (2C), 43.9, 37.3 (2C), 34.4 (2C), 30.6 (2C), 30.5 (2C), 27.2 (2C), 24.5 (2C), 24.4 (2C), 24.1 (2C), 24.1 (2C), 24.1 (2C), 23.9 (2C), 18.8; HRMS (FD+) *m/z*: [M] Calcd for C<sub>50</sub>H<sub>64</sub>O<sub>2</sub> 696.49063, found: 696.49046; IR (ATR) 3509, 2959, 2927, 2867, 1767, 1698, 1606, 1573, 1460, 1439, 1382, 1362, 1320, 1282, 1218, 1103, 1060, 1045, 984, 936, 877, 809, 666 cm<sup>-1</sup>; [α]<sub>D</sub><sup>21.7</sup> = (c = 1.90 in CHCl<sub>3</sub>, ee >99%); m.p.: 144 °C.

**(5*S*,8a*S*)-14-hydroxy-1,12-bis(2,4,6-triisopropylphenyl)-5,6,7,8,8a,9-hexahydro-4,5-methanobenzo[*g*]fluoreno[4,4*b*-*de*][1,3,2]dioxaphosphocine 14-oxide ((*S*)-**1ga**)**

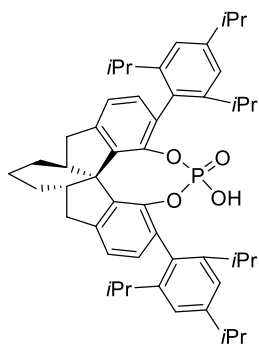

To a stir solution of **S1-3** (300 mg, 0.43 mmol) in pyridine (4.3 mL) was added dropwise  $\text{PBr}_3$  (81.7  $\mu\text{L}$ , 0.86 mmol, 2.0 equiv.). After stirring it for 1 h at room temperature, *m*-CPBA (229 mg, 0.86 mmol, >65% wt) was added at 0 °C. The color of solution changed immediately. After stirring it for 1 h at room temperature, water (1.5 mL) was added to the solution at 0 °C. After stirring it for 24 h at 80 °C, the reaction was quenched with HCl (aq. 6 N, 20.0 ml) and extracted with dichloromethane. The combined organic layers were washed with 6 N HCl,  $\text{NaHCO}_3$  (aq. Saturated, 10 mL\*3), and HCl (aq. 6 N, 10 mL\*2), then concentrated. After purification by flash column

chromatography on silica gel (n-hexane/EtOAc = 10:1 to 4:1 as eluent), the obtained product was dissolved in dichloromethane, washed with HCl (aq. 6 N, 10 mL), concentrated under reduced pressure and recrystallization with MeCN Then the product was dried over at 60 °C under vacuum to give the pure product (*S*)-**1ga** (89 mg) in 27% yield as a white solid.

$^1\text{H-NMR}$  (600 MHz,  $\text{CDCl}_3$ )  $\delta$  7.13 (s, 4H), 7.04 (d,  $J = 1.7$  Hz, 2H), 6.96 (d,  $J = 1.7$  Hz, 2H), 3.22 (dd,  $J = 17.2$  Hz, 8.6 Hz, 2H), 3.04 (dd,  $J = 17.2$ , 10.3 Hz, 2H), 2.89 (sept,  $J = 6.8$  Hz, 4H), 2.73 (sept,  $J = 6.8$  Hz, 2H), 2.52-2.48 (m, 2H), 1.99-1.94 (m, 2H), 1.68-1.57 (m, 4H), 1.26(4) (d,  $J = 6.8$  Hz, 6H), 1.26(3) (d,  $J = 6.8$  Hz, 6H), 1.22 (d,  $J = 7.2$  Hz, 6H), 1.20 (d,  $J = 6.8$  Hz, 6H) 1.11 (d,  $J = 6.5$  Hz, 6H), 0.81 (d,  $J = 6.9$  Hz, 6H);  $^{31}\text{P-NMR}$  (243 MHz,  $\text{CDCl}_3$ )  $\delta$  -8.2;  $^{13}\text{C-NMR}$  (151 MHz,  $\text{CDCl}_3$ )  $\delta$  148.2 (2C), 147.9 (2C), 147.2 (2C), 144.1 (2C), 143.9 (2C), 140.0 (2C), 132.4 (2C), 131.4 (2C), 131.4 (2C), 121.6 (2C), 121.3 (2C), 120.3 (2C), 63.2 (2C), 58.7 (2C), 46.3, 36.1 (2C), 34.2 (2C), 30.8 (2C), 27.0 (2C), 24.8 (2C), 24.1 (2C), 23.9 (2C), 23.5 (2C), 19.1 (2C), 17.7 (2C), 15.1; HRMS (FD+)  $m/z$ : [M] Calcd for  $\text{C}_{50}\text{H}_{63}\text{PO}_4$  758.44640, found: 758.44618; IR (ATR) 2961, 2924, 2869, 1465, 1236, 1091, 1036, 997, 877, 755  $\text{cm}^{-1}$ ;  $[\alpha]_{\text{D}}^{22.1} = -194.2^\circ$  ( $c = 1.0$  in  $\text{CHCl}_3$ , ee > 99%); m.p.: 183 °C.

## 5. References

- 1 A. L. Gutman, K. Zuobi, T. Bravdo *J. Org. Chem.* **1990**, *55*, 3546–3552
- 2 Y. Lu, J. L. Y. Zhu, J. Shen, D. Liu, W. Z. *Tetrahedron* **2019**, *75*, 3643-3649
- 3 B. Tan, W. Ding, S. Li China, CN111233932 A 2020-06-05  
M. Venugopal, S. Elango, A. Parthiban and Eni, *Tetrahedron: Asymmetry* **2004**, *15*, 3427–3431.
- 4 Z. Zheng, Y. Cao, Qi. Chong, Z. Han, J. Ding, C. Luo, Z. Wang, D. Zhu, Q. Zhou, K. Ding. *J. Am. Chem. Soc.* **2018**, *140*, 10374–10381

Main text, Ref. 11

- Gaussian 09: M. J. Frisch, G. W. Trucks, H. B. Schlegel, G. E. Scuseria, M. A. Robb, J. R. Cheeseman, G. Scalmani, V. Barone, B. Mennucci, G. A. Petersson, H. Nakatsuji, M. Caricato, X. Li, H. P. Hratchian, A. F. Izmaylov, J. Bloino, G. Zheng, J. L. Sonnenberg, M. Hada, M. Ehara, K. Toyota, R. Fukuda, J. Hasegawa, M. Ishida, T. Nakajima, Y. Honda, O. Kitao, H. Nakai, T. Vreven, J. A. Montgomery, Jr., J. E. Peralta, F. Ogliaro, M. Bearpark, J. J. Heyd, E. Brothers, K. N. Kudin, V. N. Staroverov, R. Kobayashi, J. Normand, K. Raghavachari, A. Rendell, J. C. Burant, S. S. Iyengar, J. Tomasi, M. Cossi, N. Rega, J. M. Millam, M. Klene, J. E. Knox, J. B. Cross, V. Bakken, C. Adamo, J. Jaramillo, R. Gomperts, R. E. Stratmann, O. Yazyev, A. J. Austin, R. Cammi, C. Pomelli, J. W. Ochterski, R. L. Martin, K. Morokuma, V. G. Zakrzewski, G. A. Voth, P. Salvador, J. J. Dannenberg, S. Dapprich, A. D. Daniels, Ö. Farkas, J. B. Foresman, J. V. Ortiz, J. Cioslowski, and D. J. Fox.
- Gaussian 16: M. J. Frisch, G. W. Trucks, H. B. Schlegel, G. E. Scuseria, M. A. Robb, J. R. Cheeseman, G. Scalmani, V. Barone, G. A. Petersson, H. Nakatsuji, X. Li, M. Caricato, A. V. Marenich, J. Bloino, B. G. Janesko, R. Gomperts, B. Mennucci, H. P. Hratchian, J. V. Ortiz, A. F. Izmaylov, J. L. Sonnenberg, D. Williams-Young, F. Ding, F. Lipparini, F. Egidi, J. Goings, B. Peng, A. Petrone, T. Henderson, D. Ranasinghe, V. G. Zakrzewski, J. Gao, N. Rega, G. Zheng, W. Liang, M. Hada, M. Ehara, K. Toyota, R. Fukuda, J. Hasegawa, M. Ishida, T. Nakajima, Y. Honda, O. Kitao, H. Nakai, T. Vreven, K. Throssell, J. A. Montgomery, Jr., J. E. Peralta, F. Ogliaro, M. J. Bearpark, J. J. Heyd, E. N. Brothers, K. N. Kudin, V. N. Staroverov, T. A. Keith, R. Kobayashi, J. Normand, K. Raghavachari, A. P. Rendell, J. C. Burant, S. S. Iyengar, J. Tomasi, M. Cossi, J. M. Millam, M. Klene, C. Adamo, R. Cammi, J. W. Ochterski, R. L. Martin, K. Morokuma, O. Farkas, J. B. Foresman, and D. J. Fox.

## 6. NMR Charts

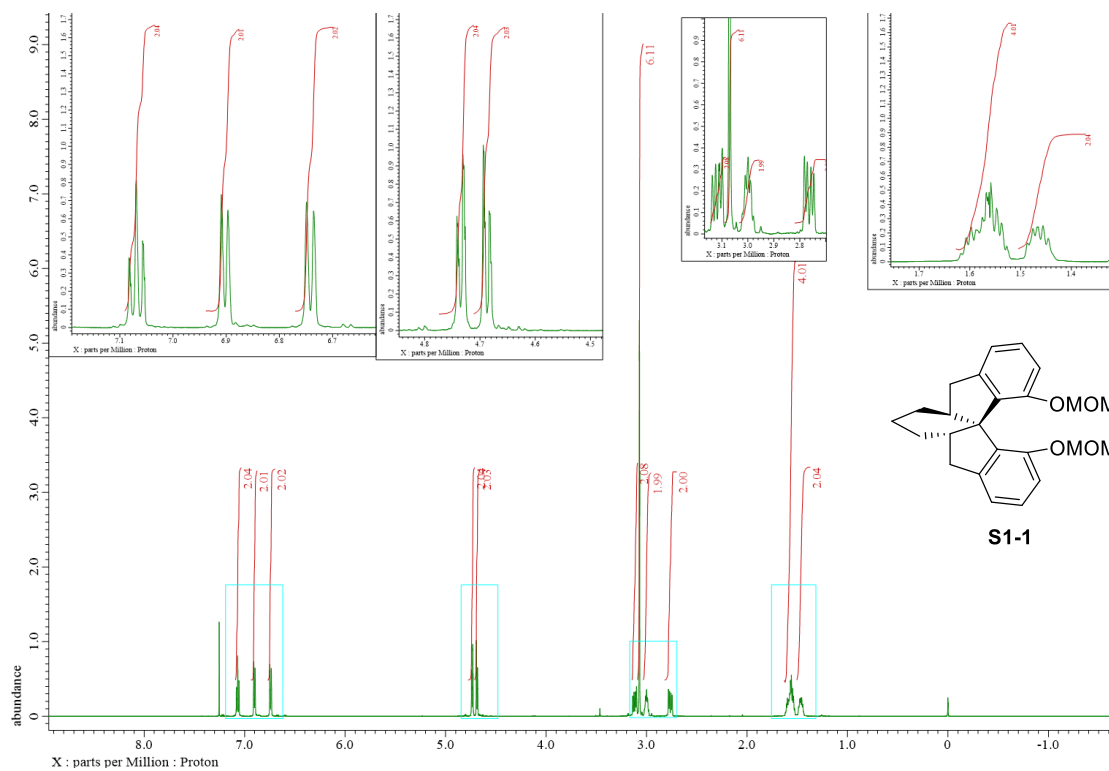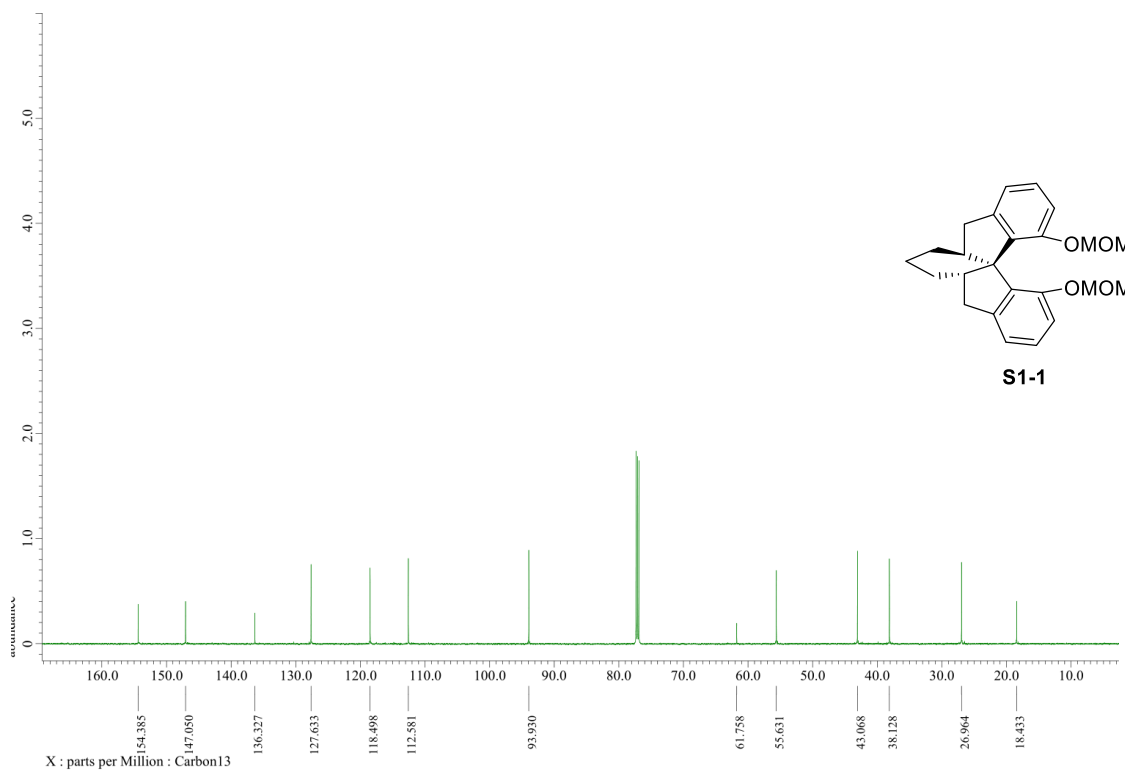

0 1.0 2.0 3.0 4.0 5.0 6.0 7.0 8.0 9.0 10.0 11.0 12.0 13.0 14.0 15.0 16.0 17.0 18.0 19.0 20.0 21.0 22.0 23.0 24.0

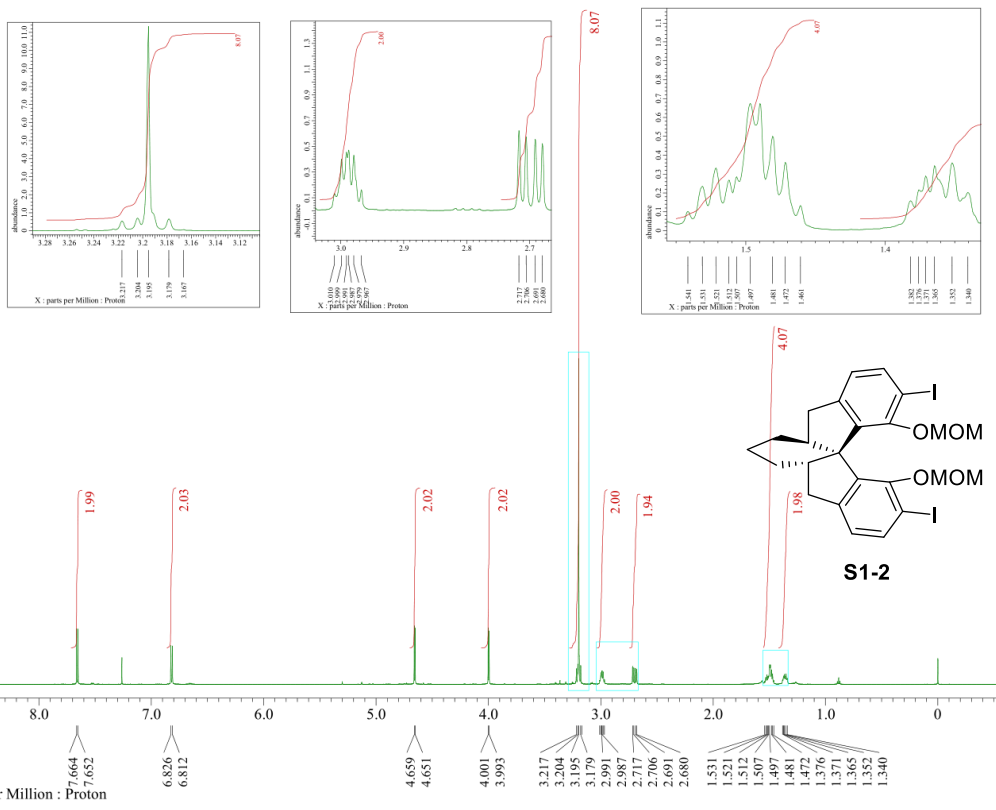

0 1.0 2.0 3.0 4.0 5.0 6.0

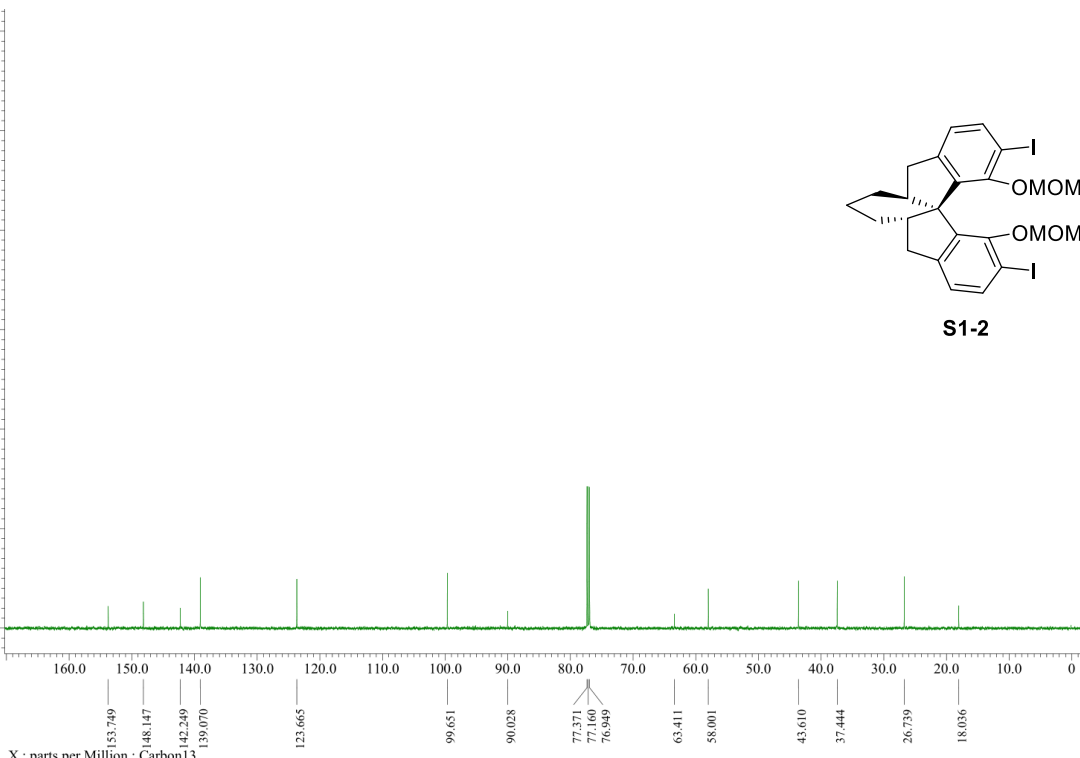

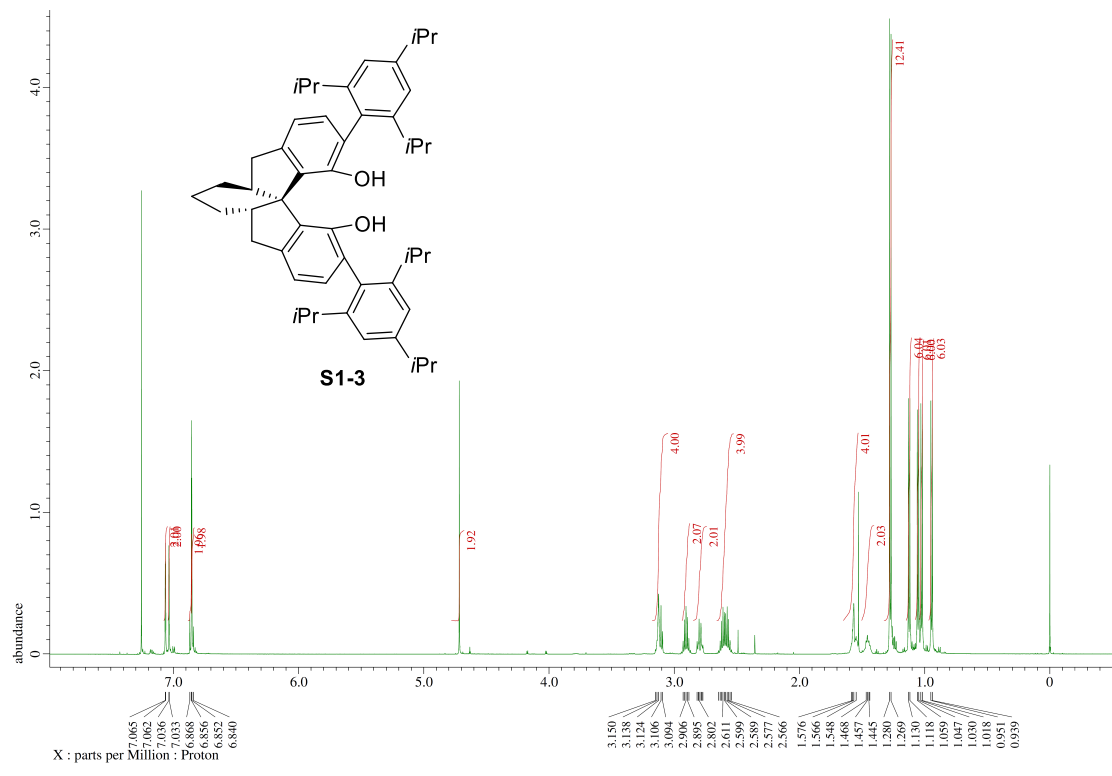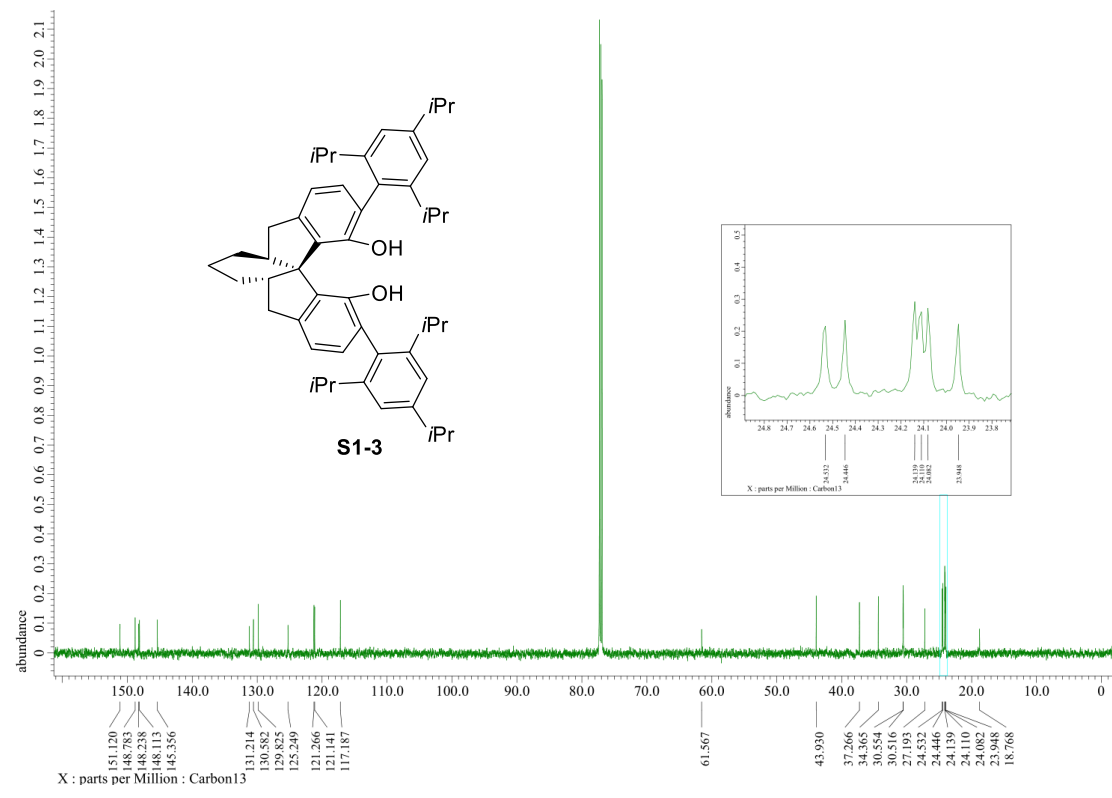



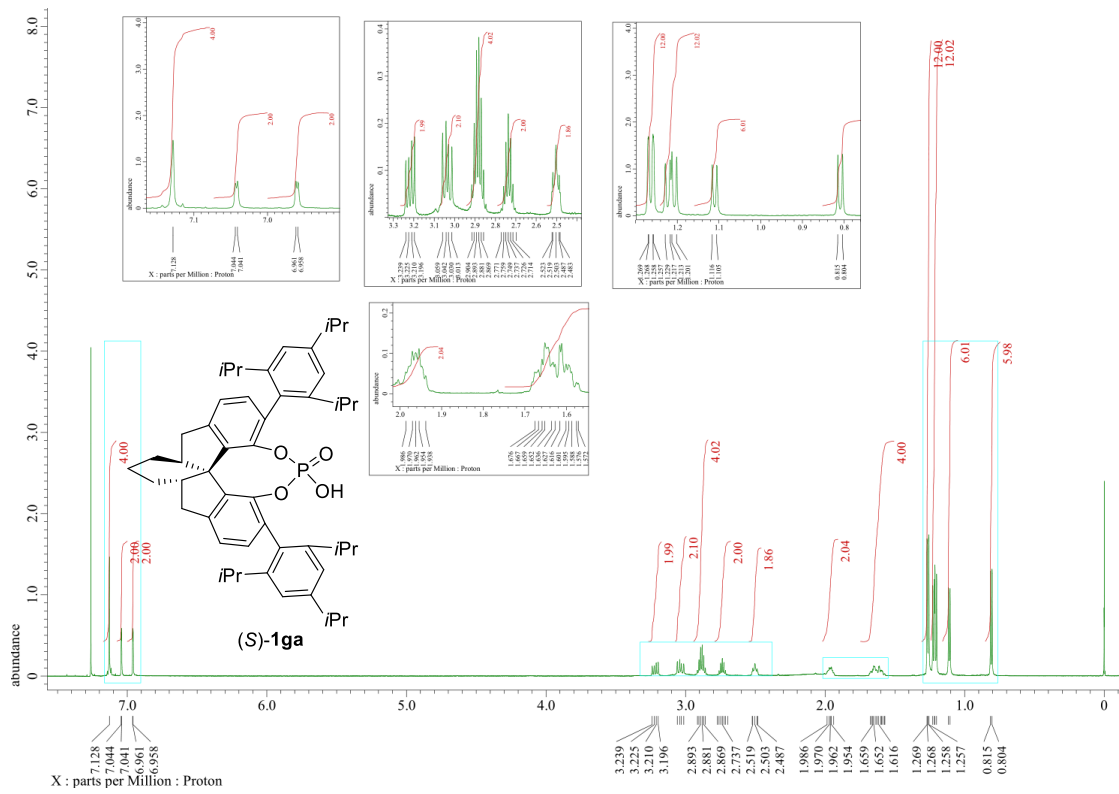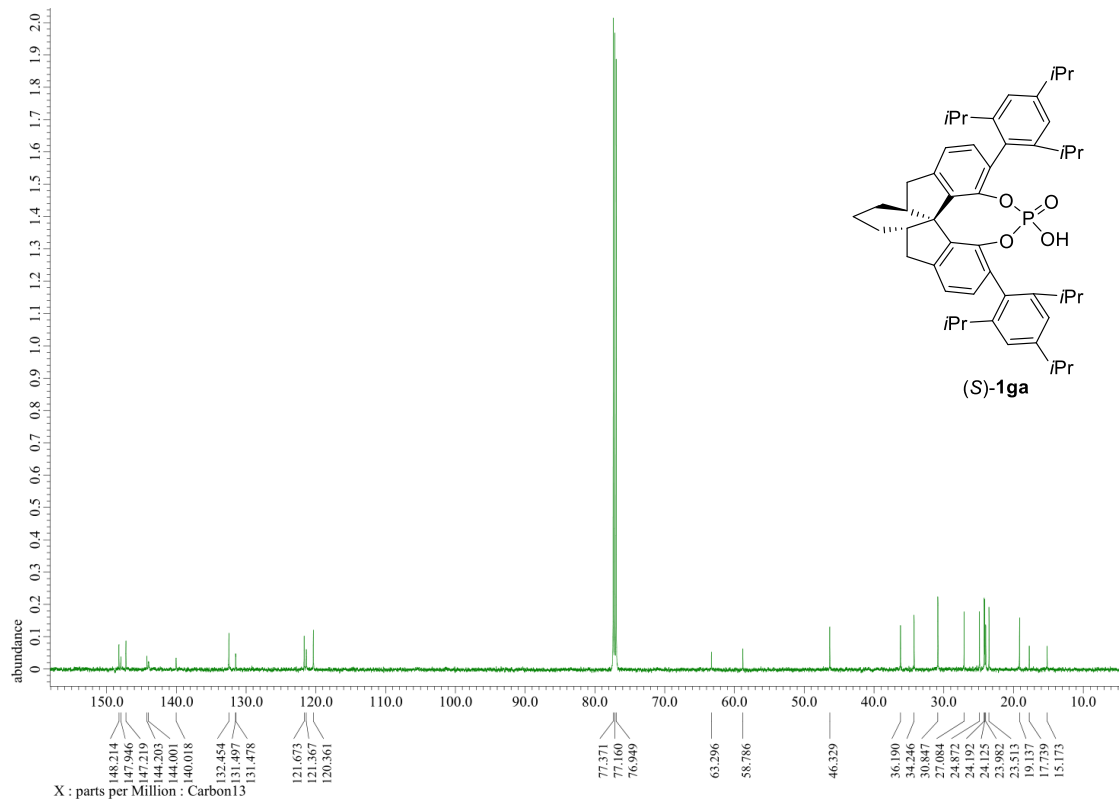

$^{31}\text{P}$  NMR

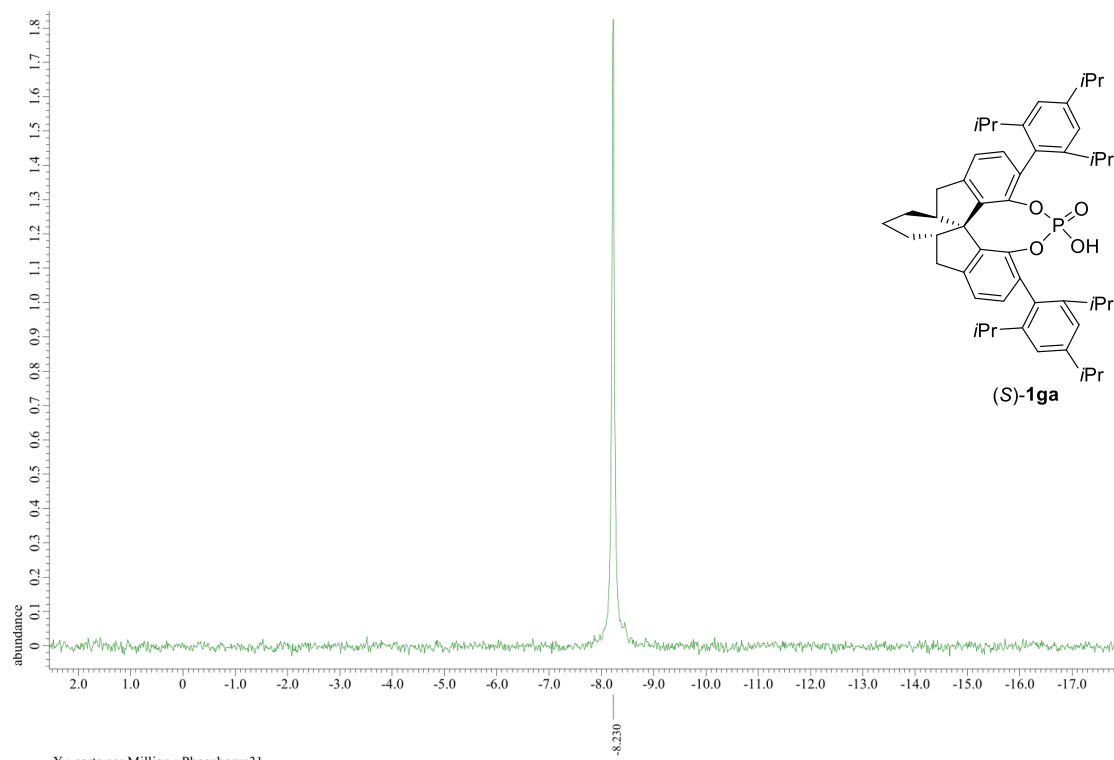

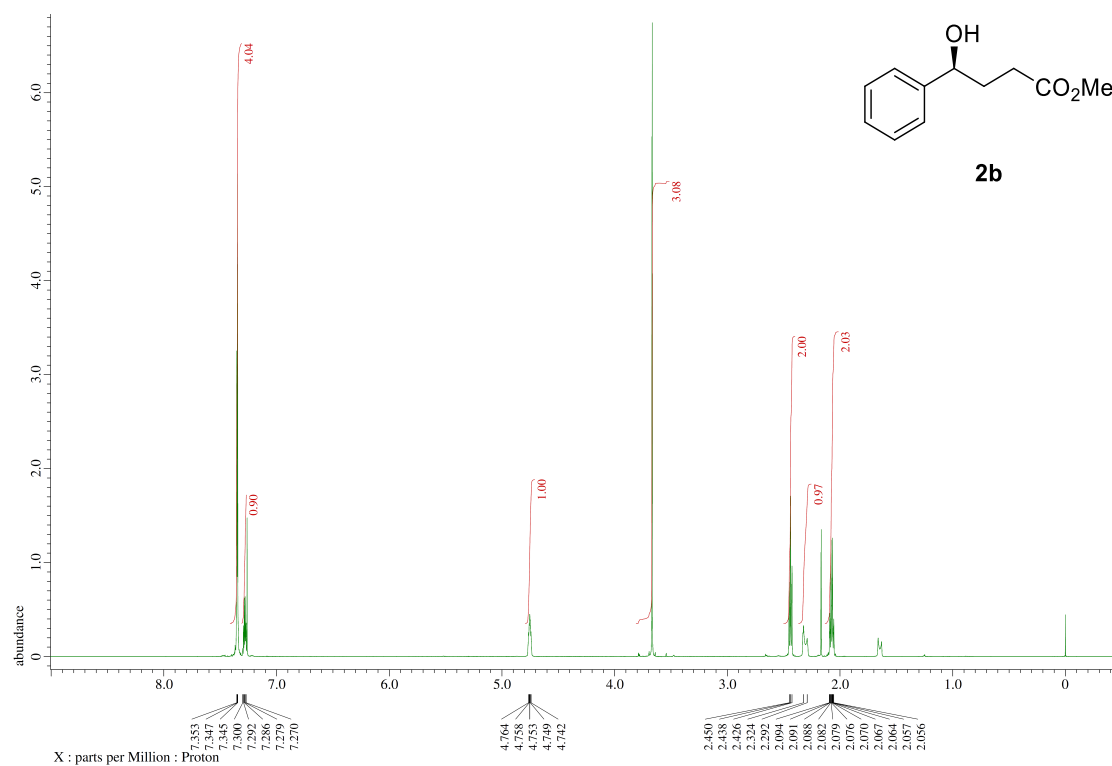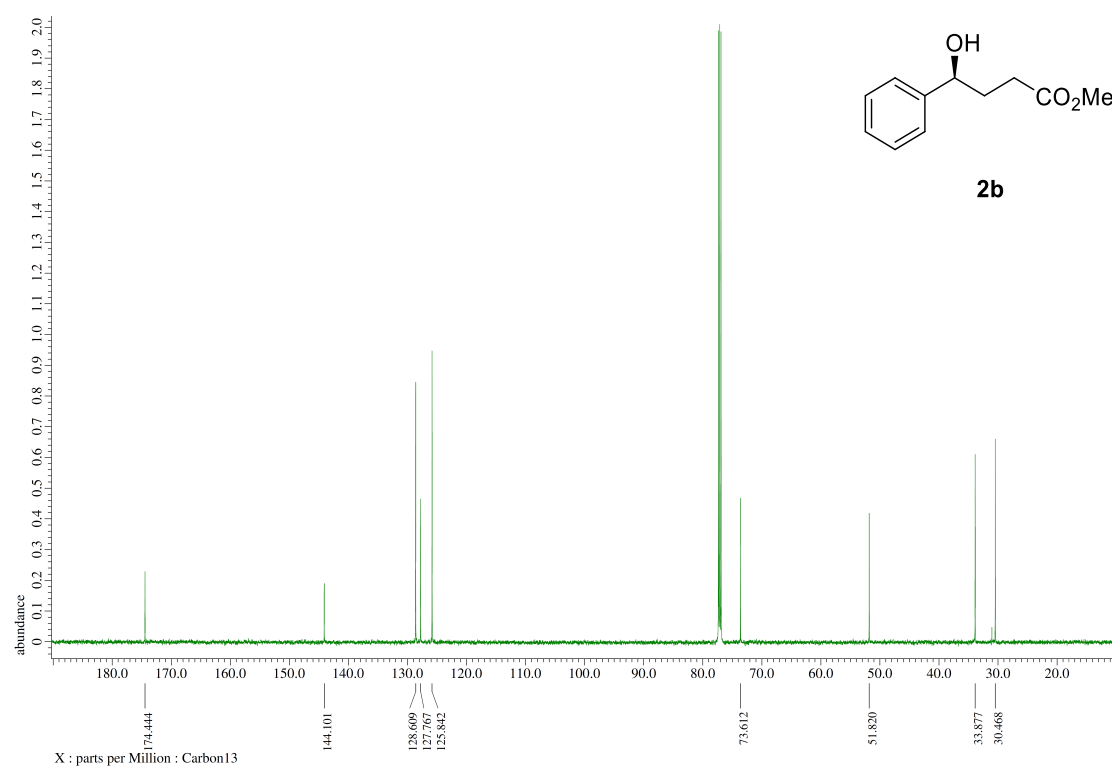

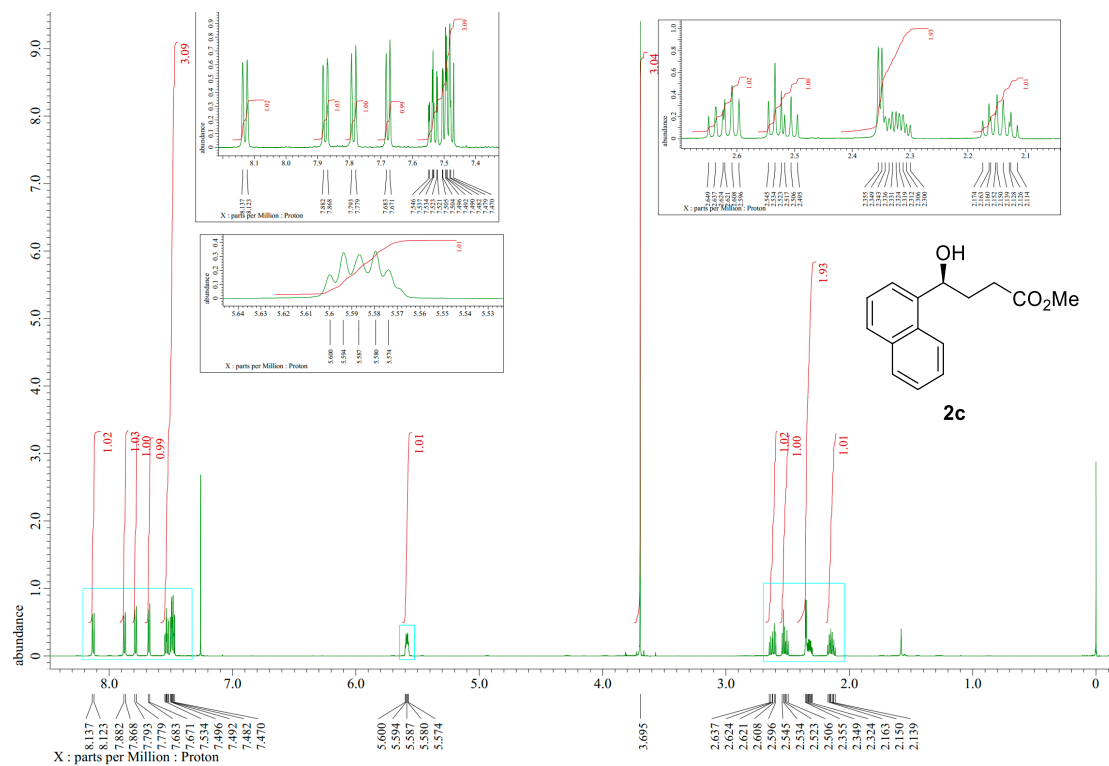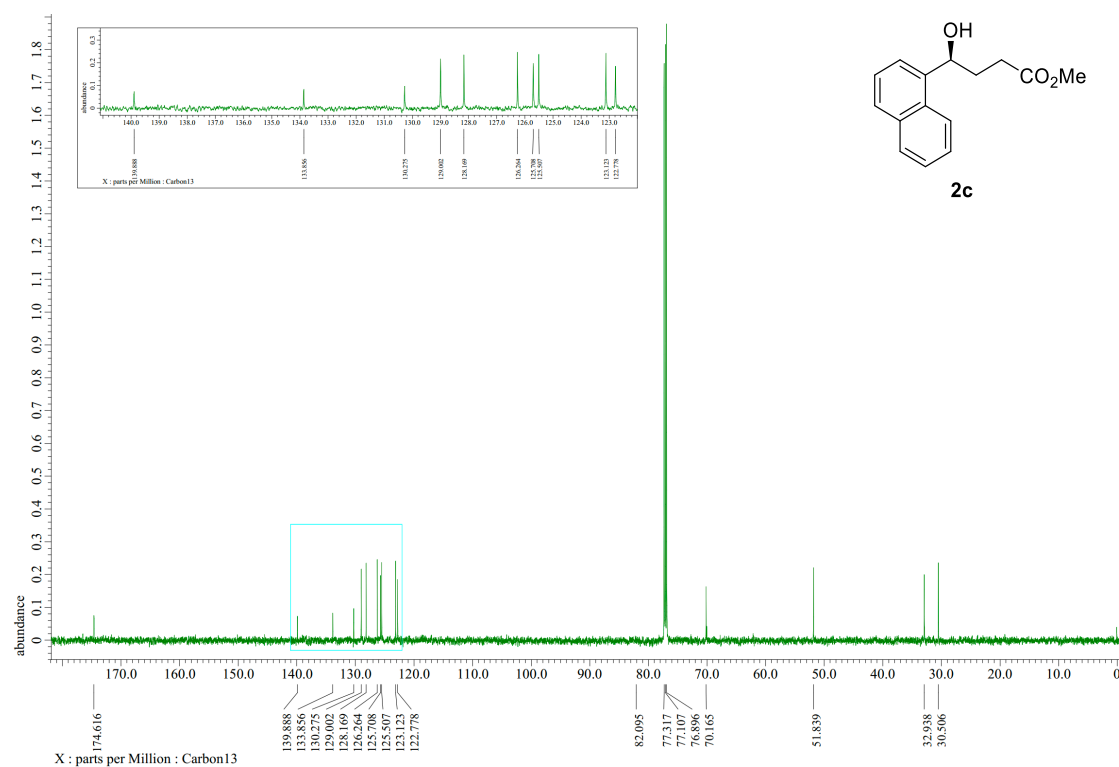

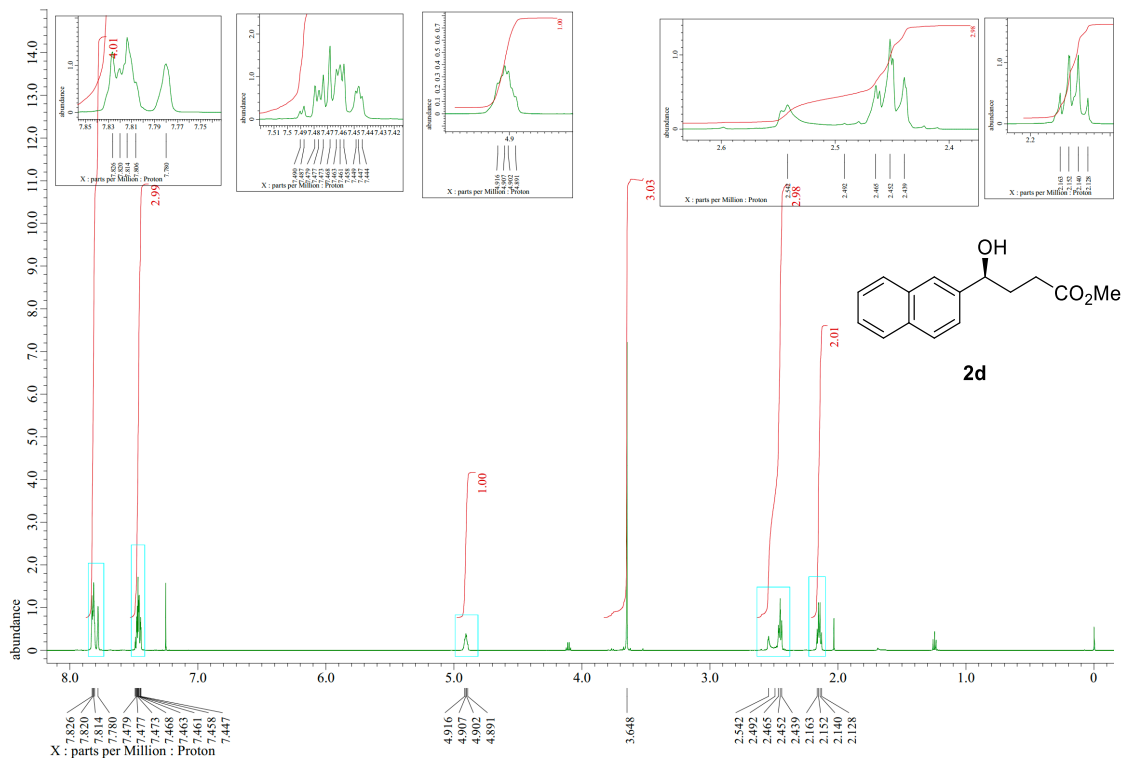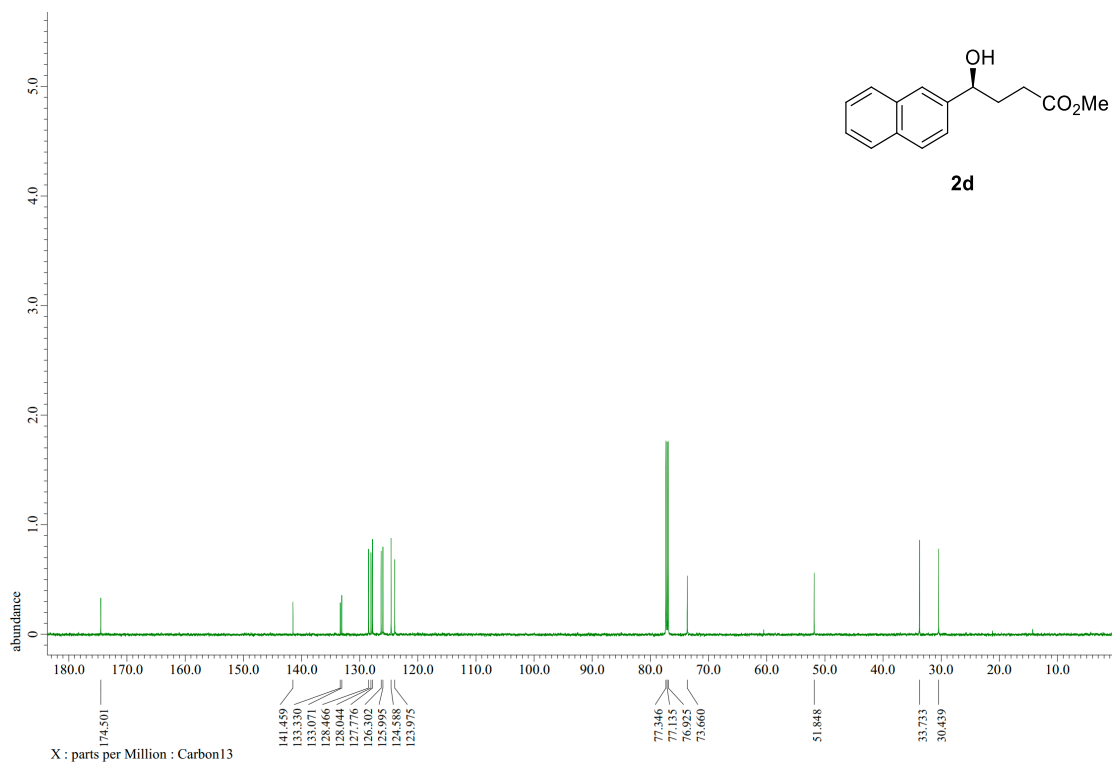

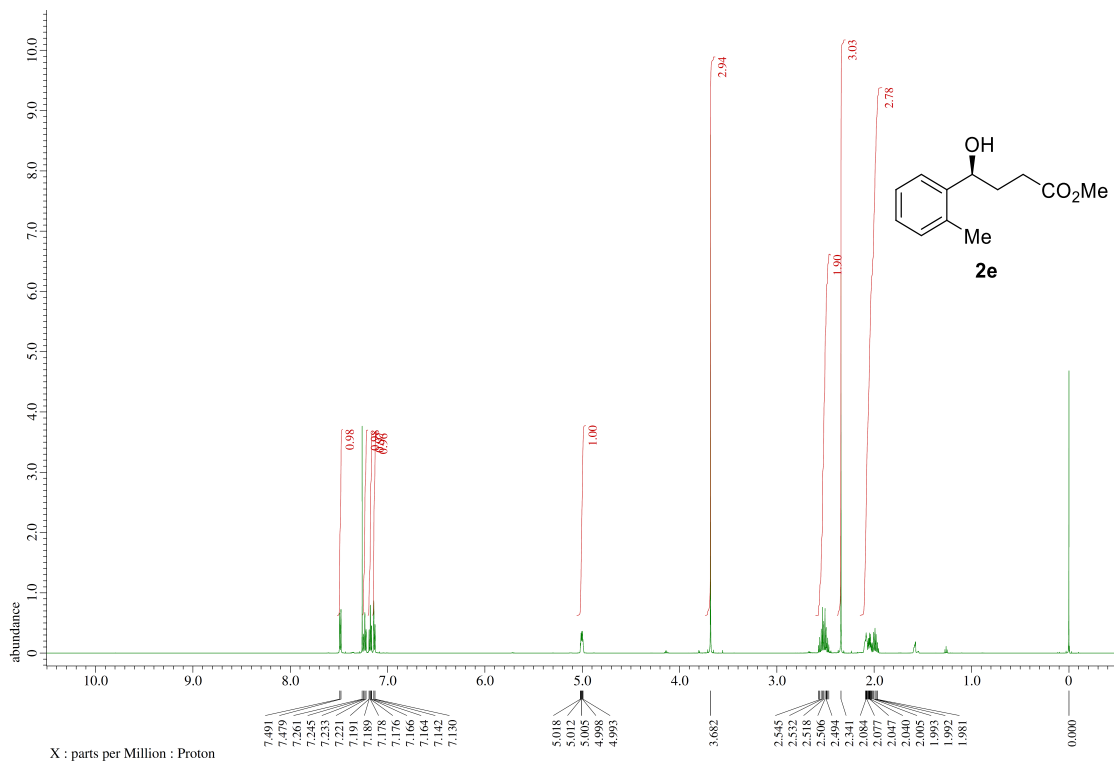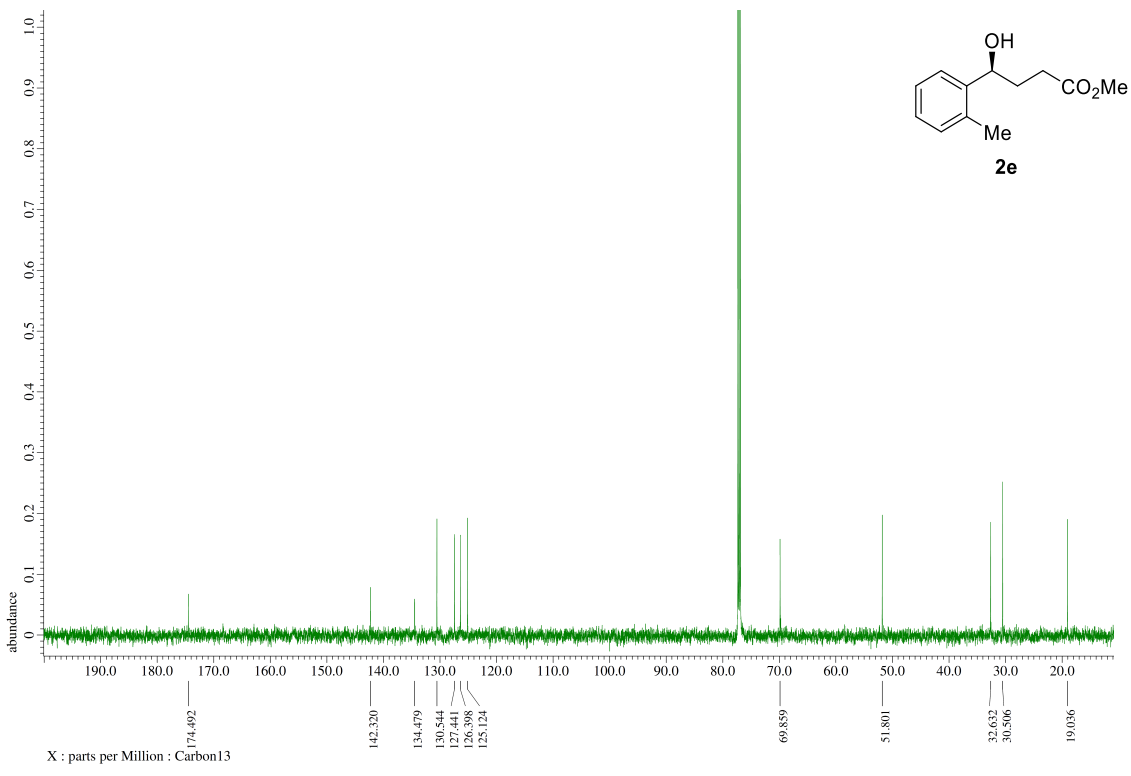

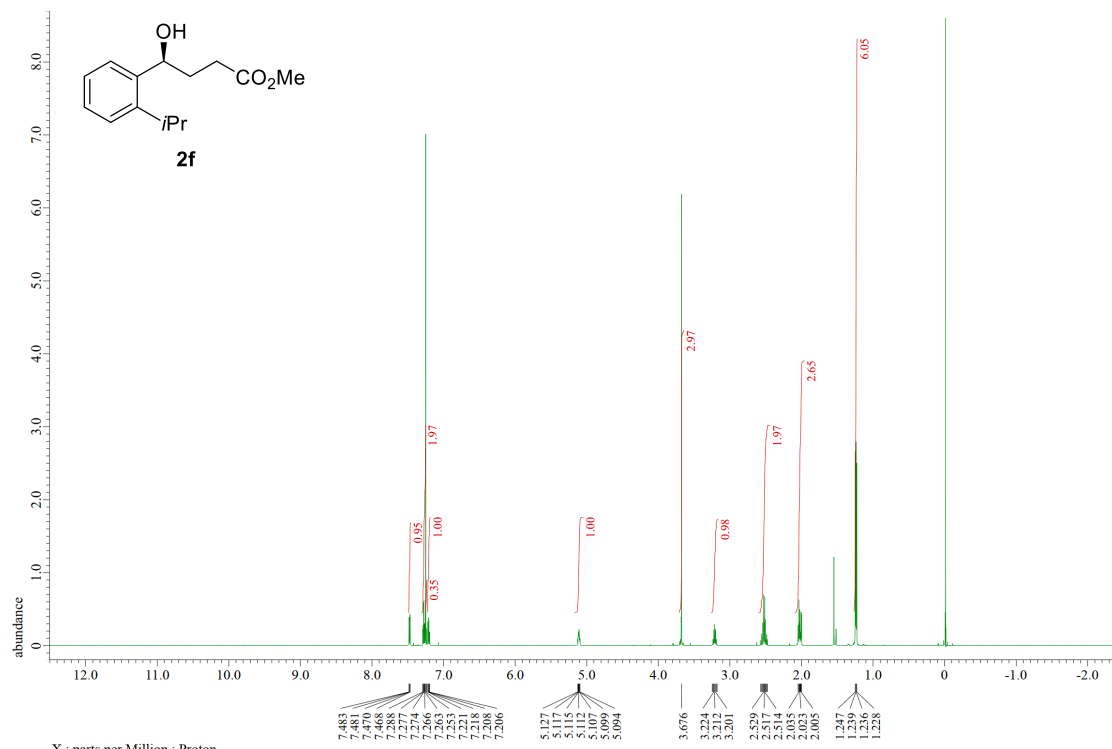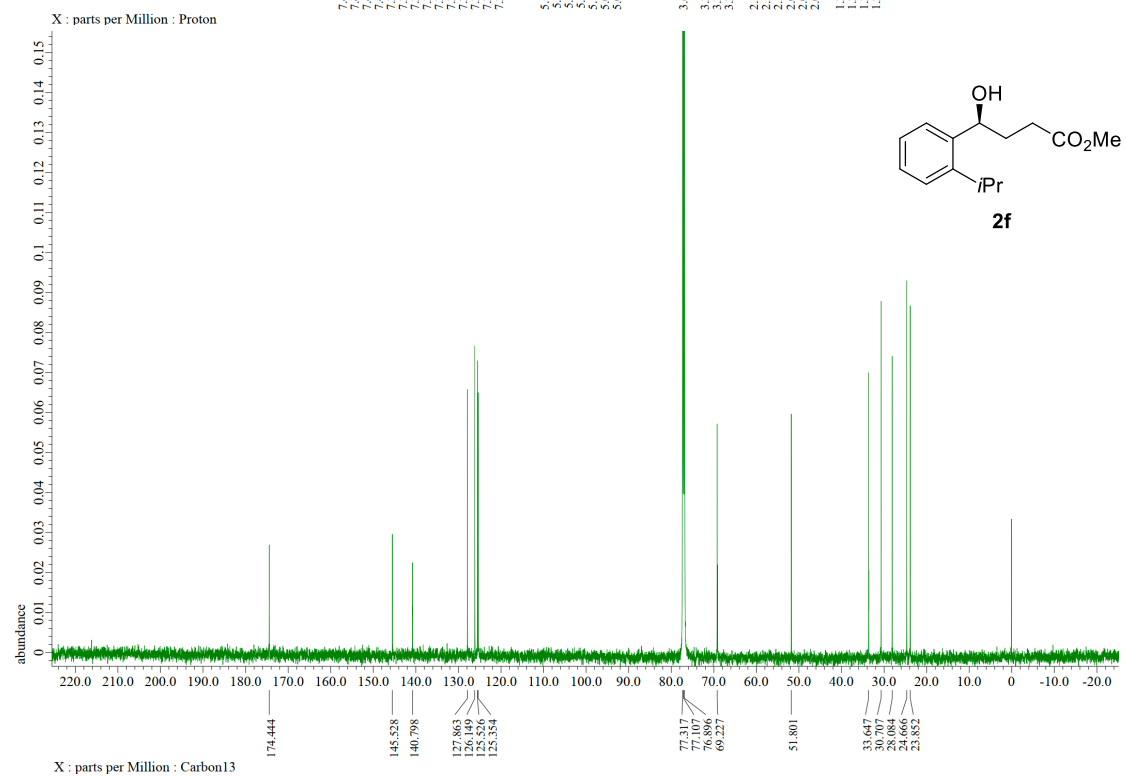

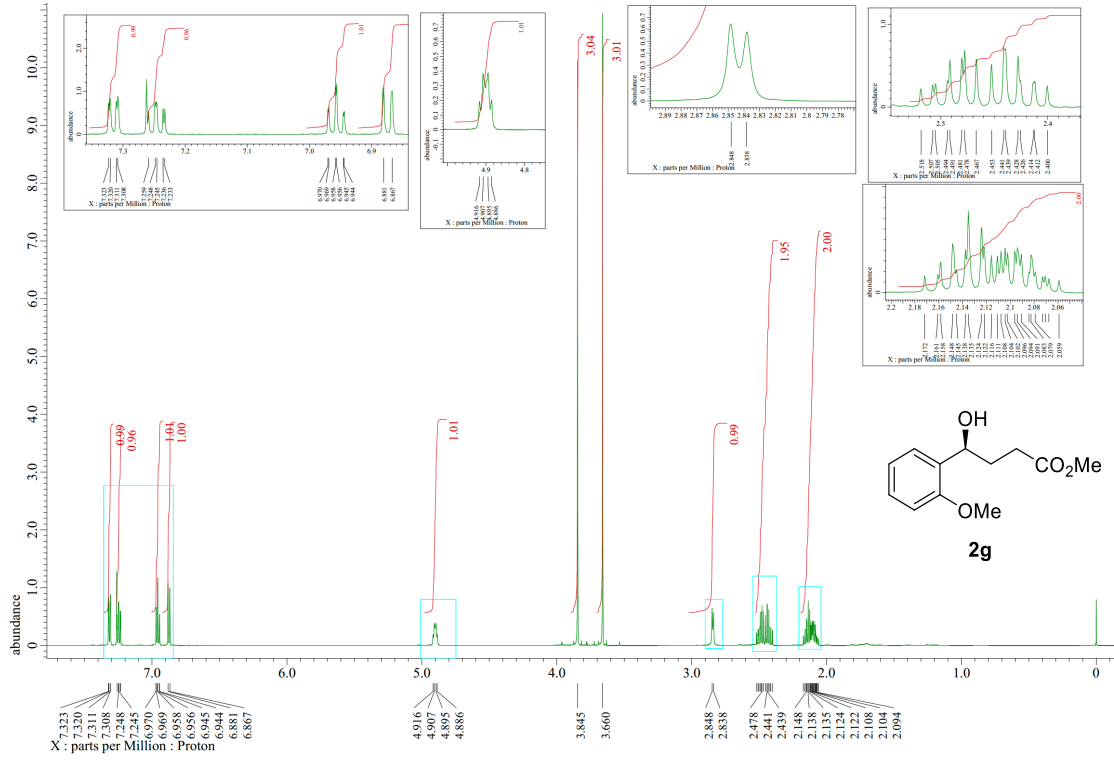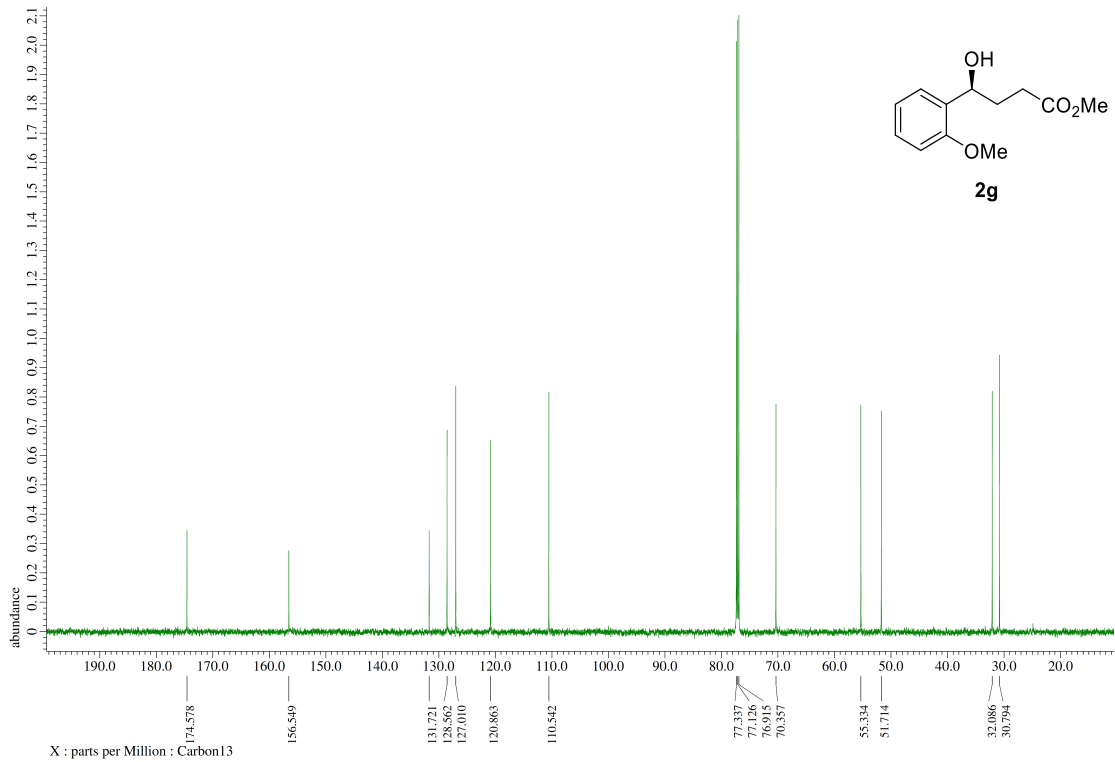



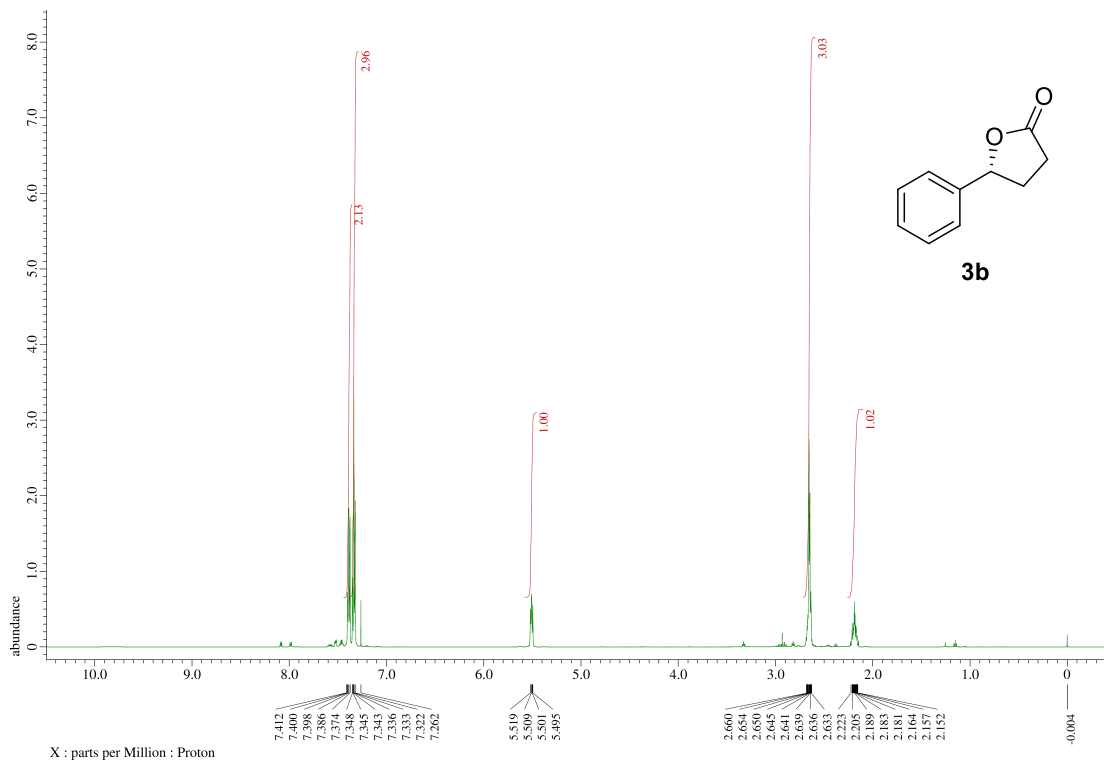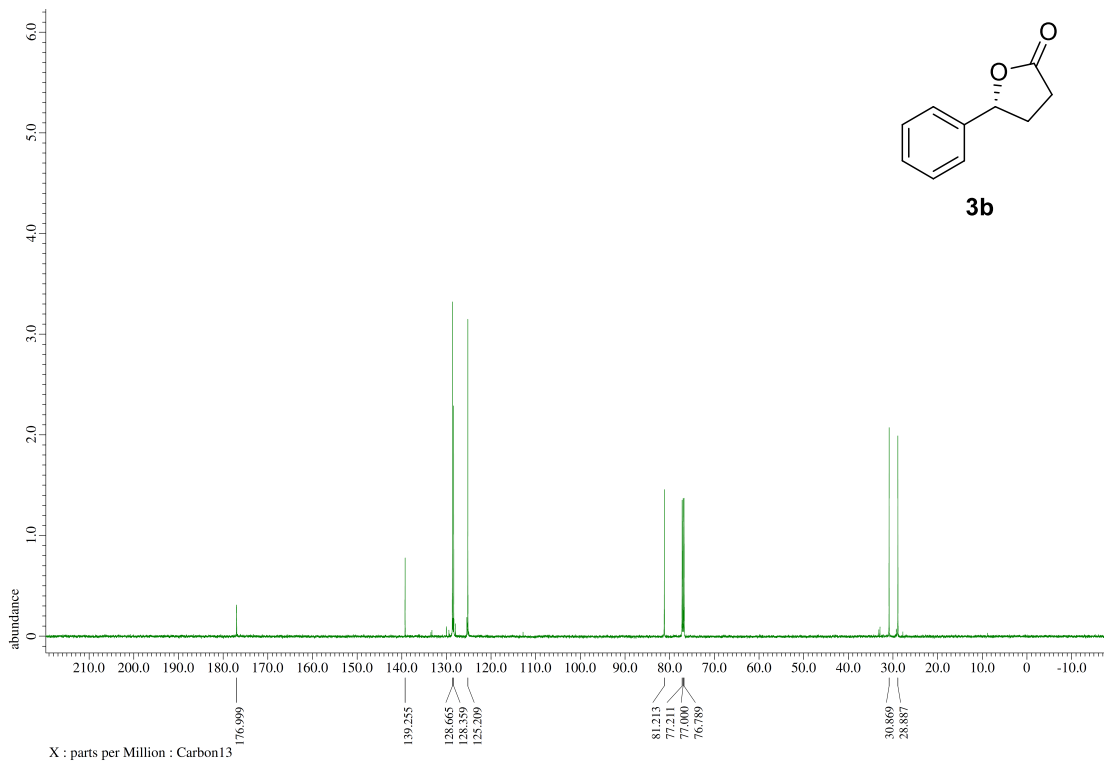



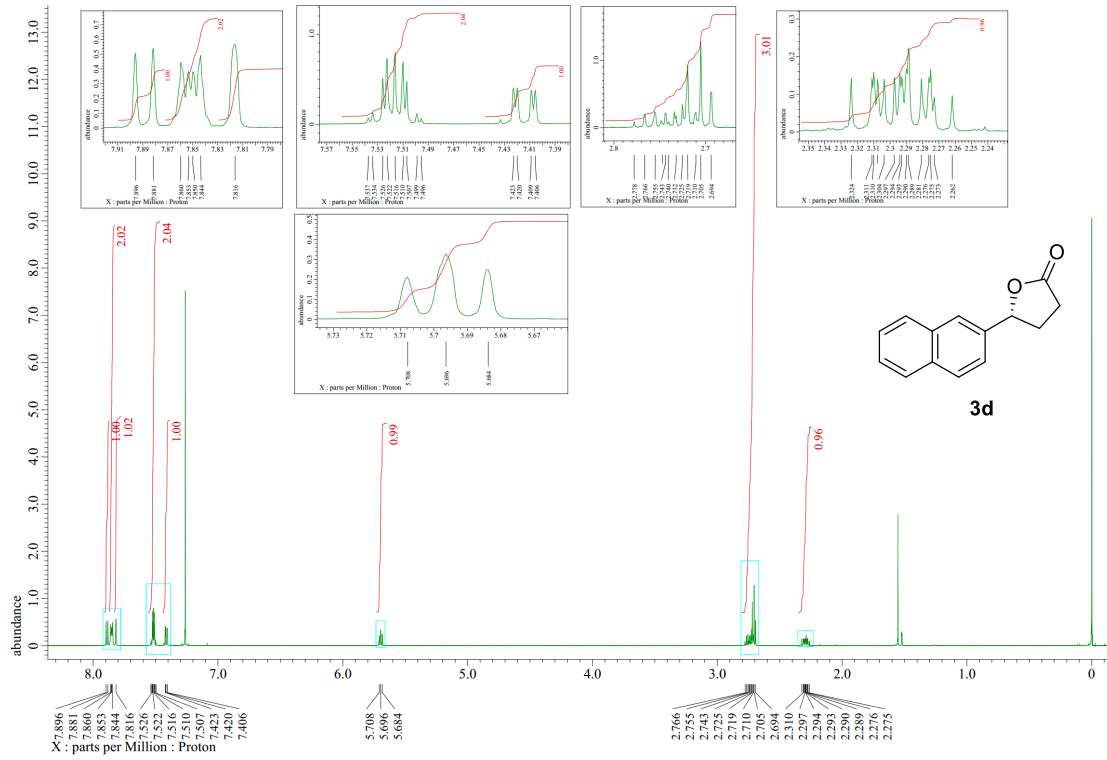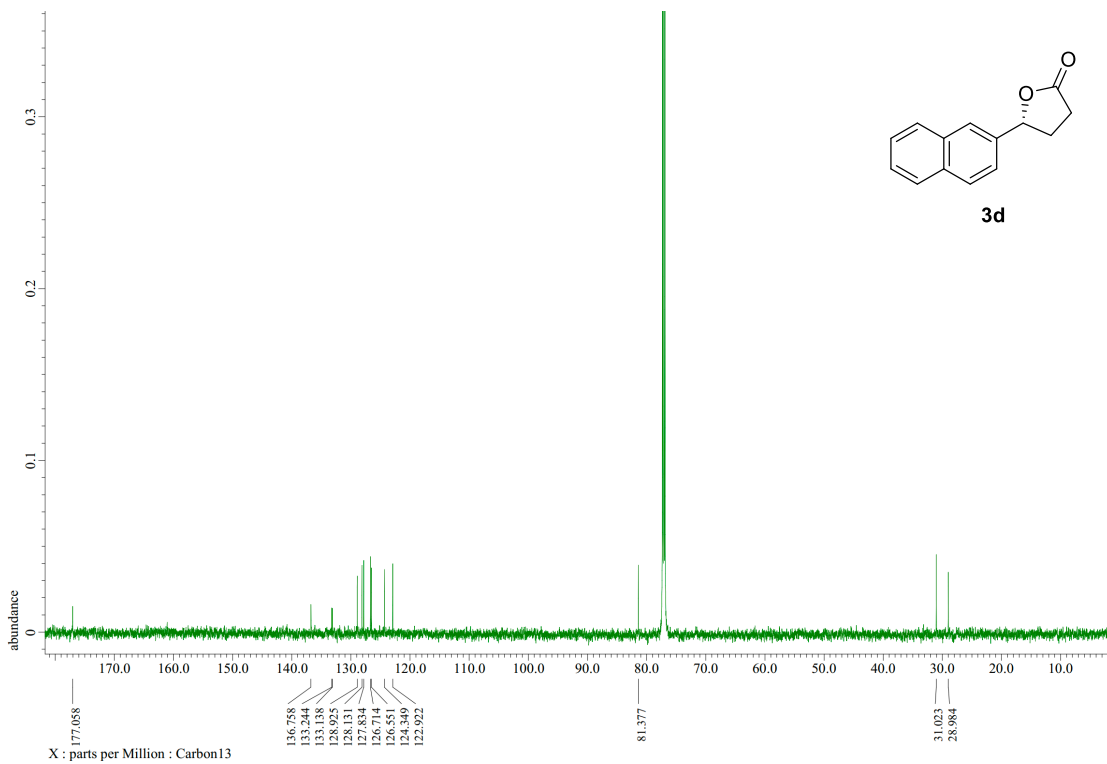

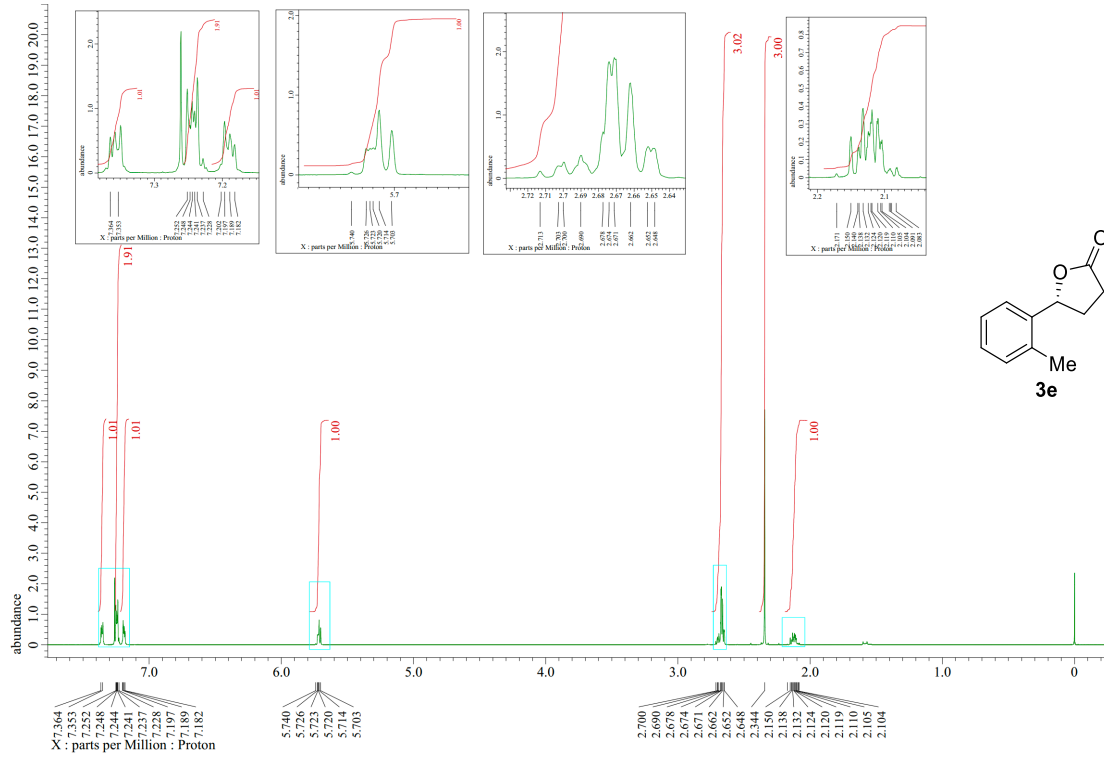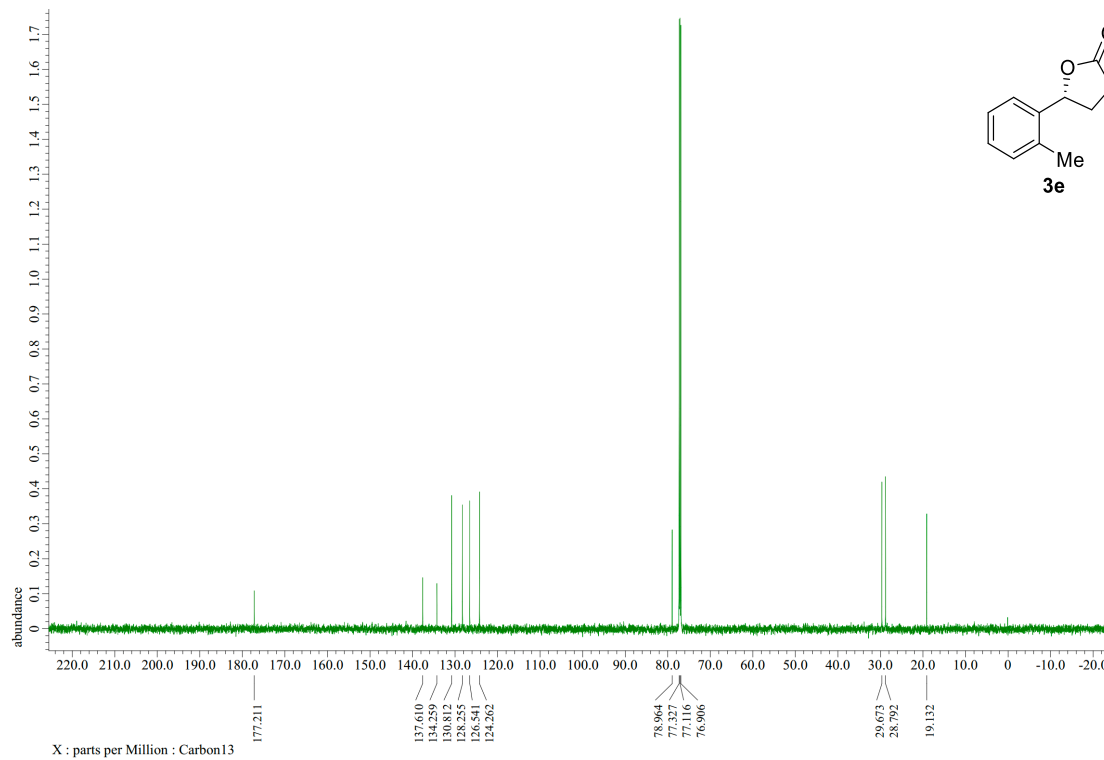

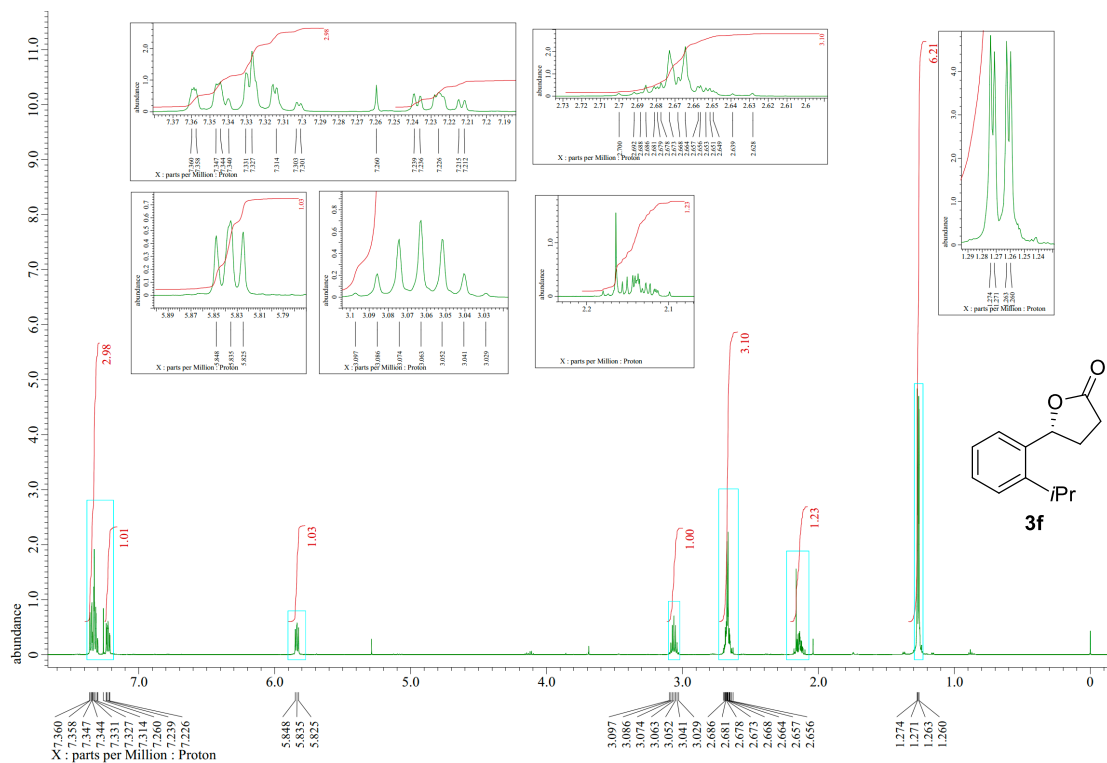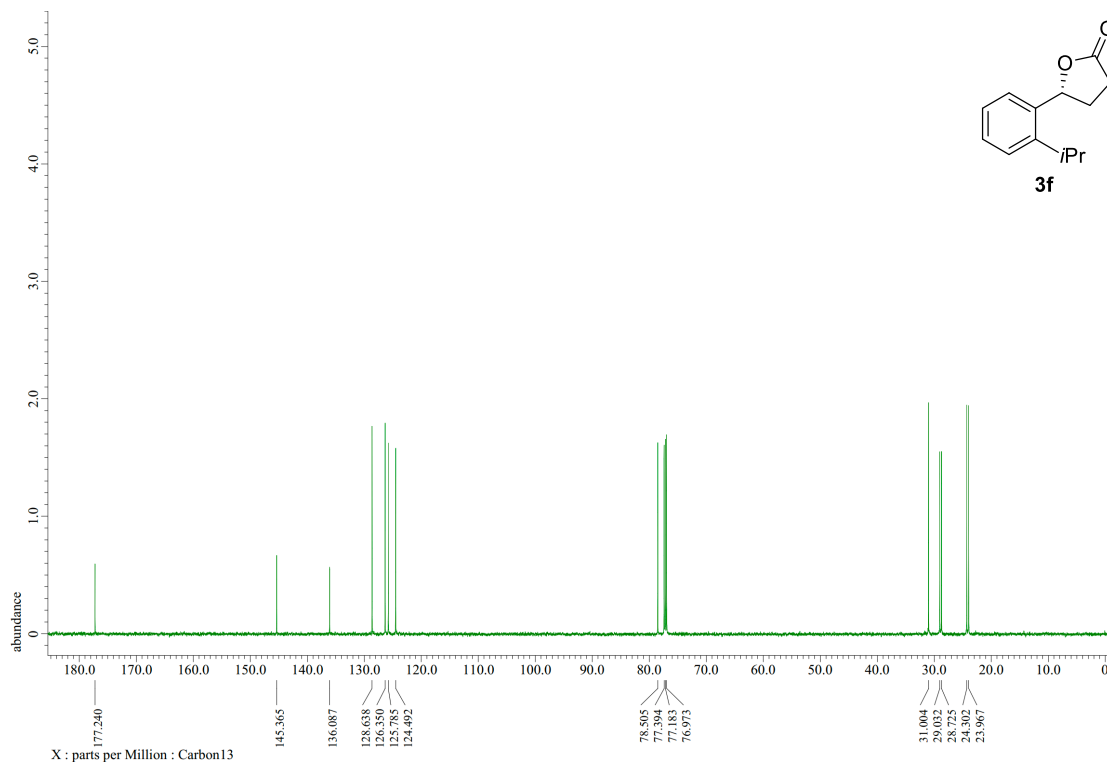

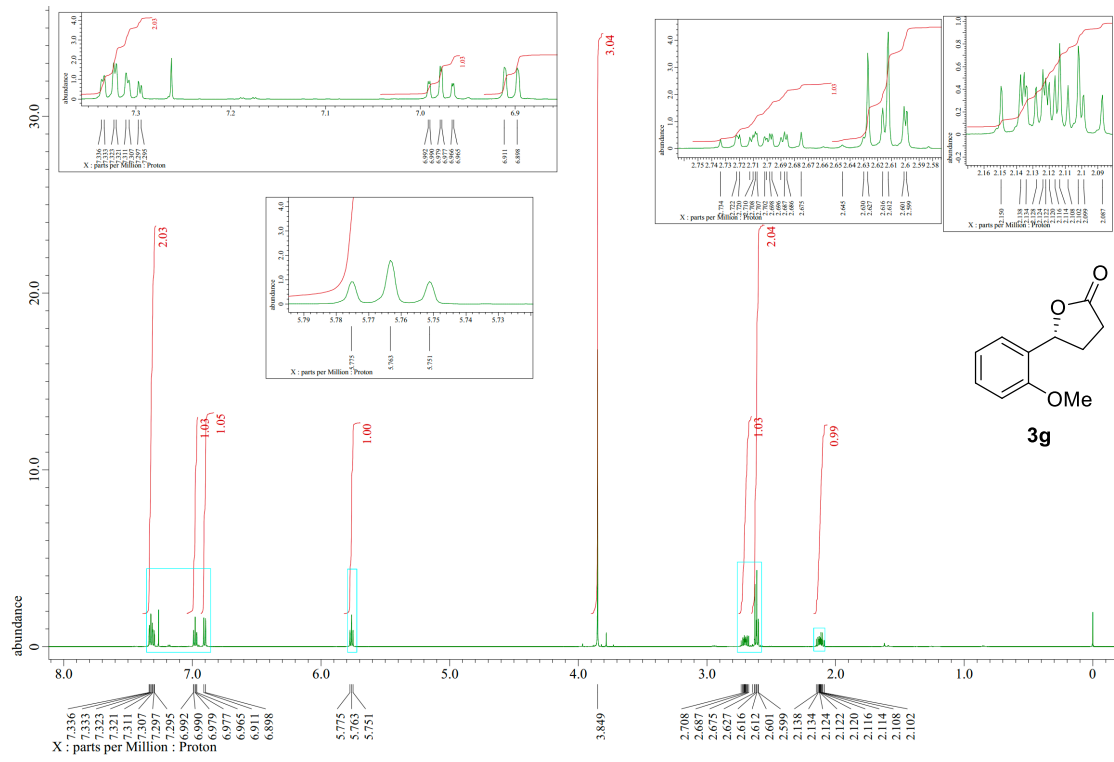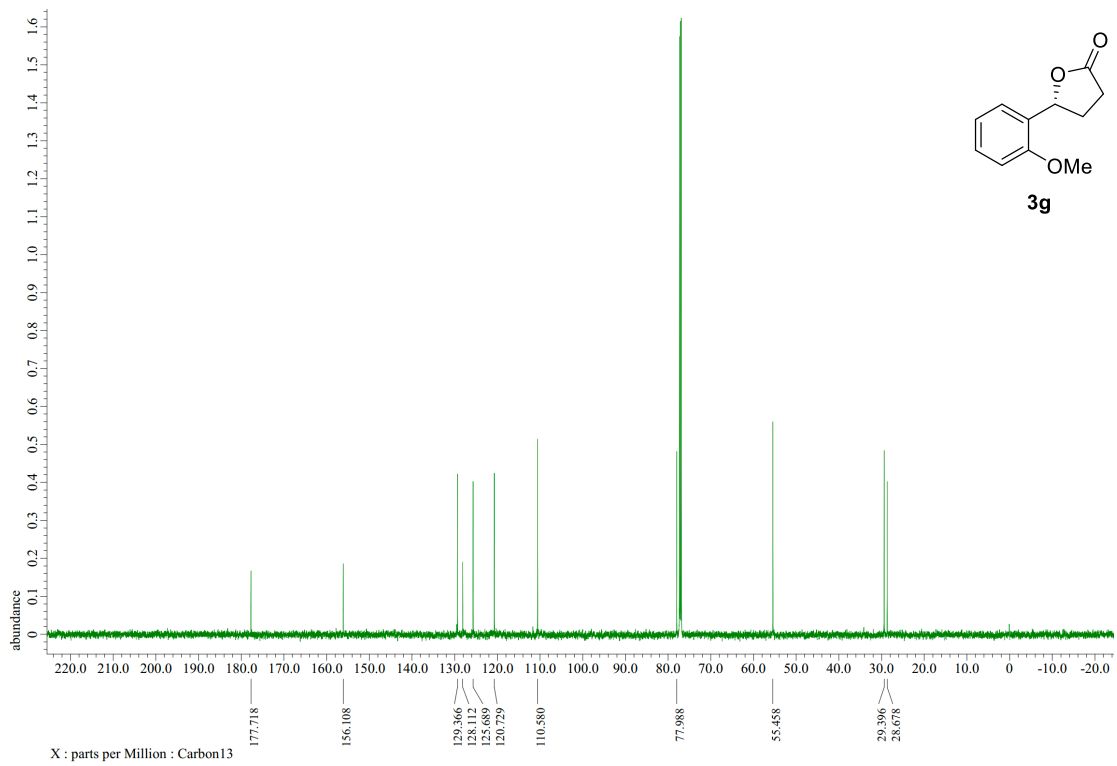

## 7. HPLC Charts

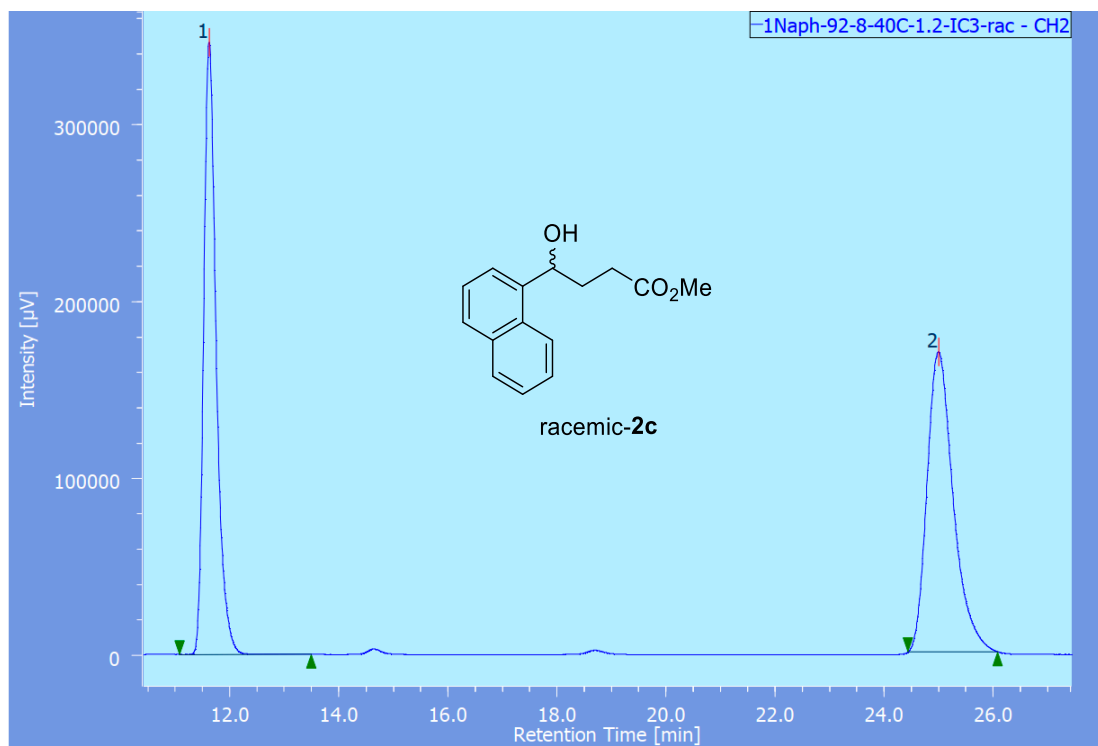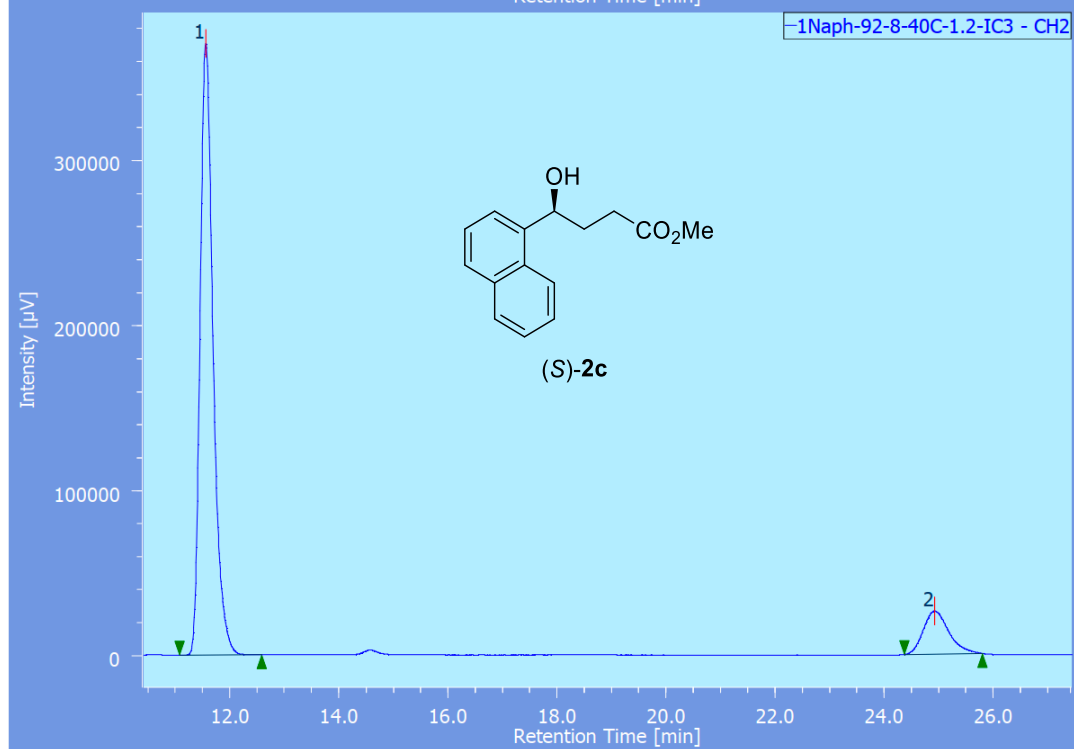

|              | Retention Time<br>1 (min) | Retention Time<br>2 (min) | Area<br>1 (%) | Area<br>2 (%) |
|--------------|---------------------------|---------------------------|---------------|---------------|
| racemic-2c   | 11.6                      | 24.9                      | 49.4          | 50.6          |
| recovered-2c | 11.5                      | 24.9                      | 87.9          | 12.1          |

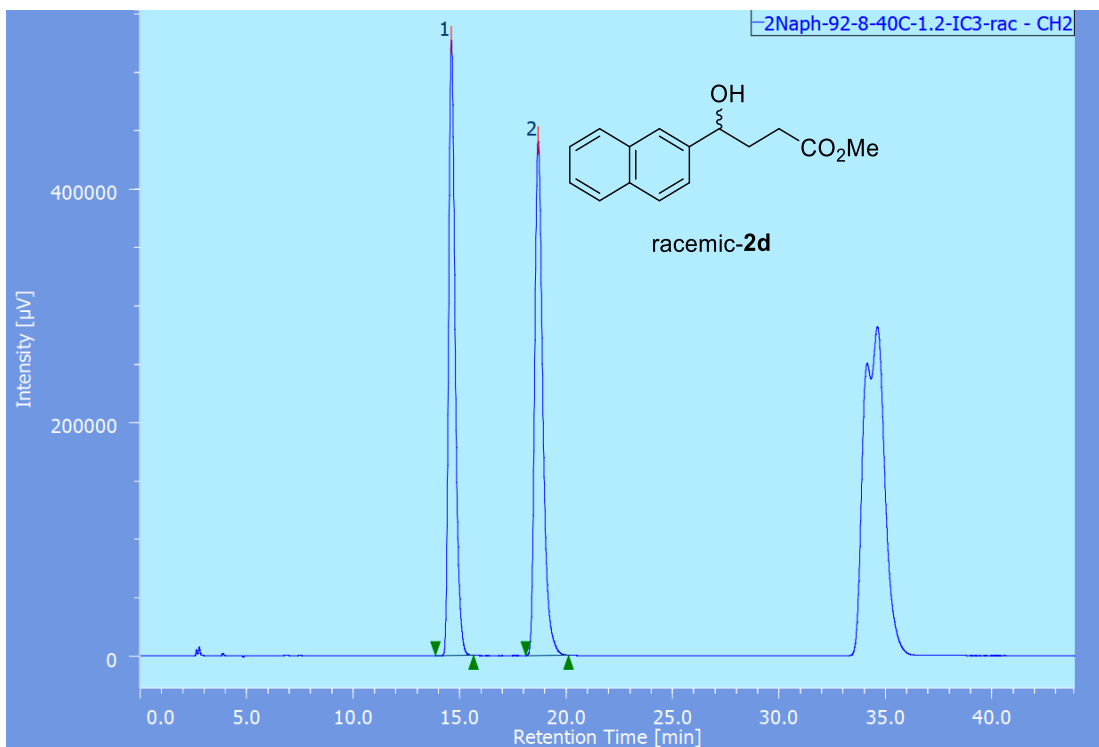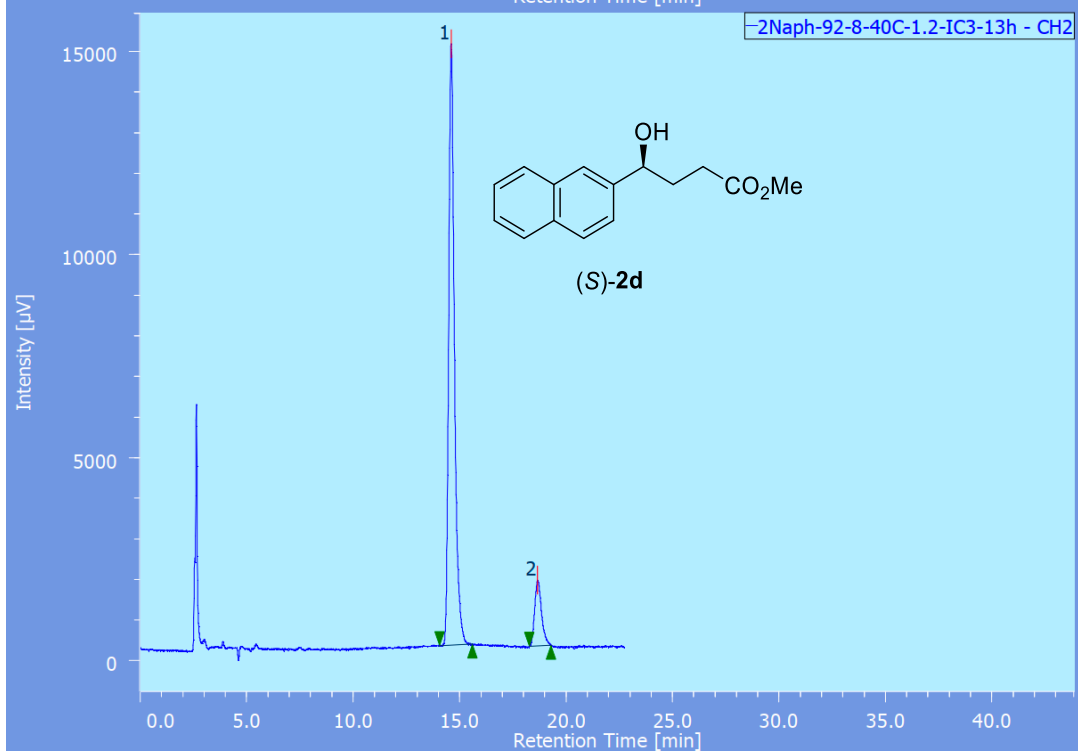

|              | Retention Time<br>1 (min) | Retention Time<br>2 (min) | Area<br>1 (%) | Area<br>2 (%) |
|--------------|---------------------------|---------------------------|---------------|---------------|
| racemic-2d   | 14.6                      | 18.6                      | 49.8          | 50.2          |
| recovered-2d | 14.6                      | 18.6                      | 88.6          | 11.4          |



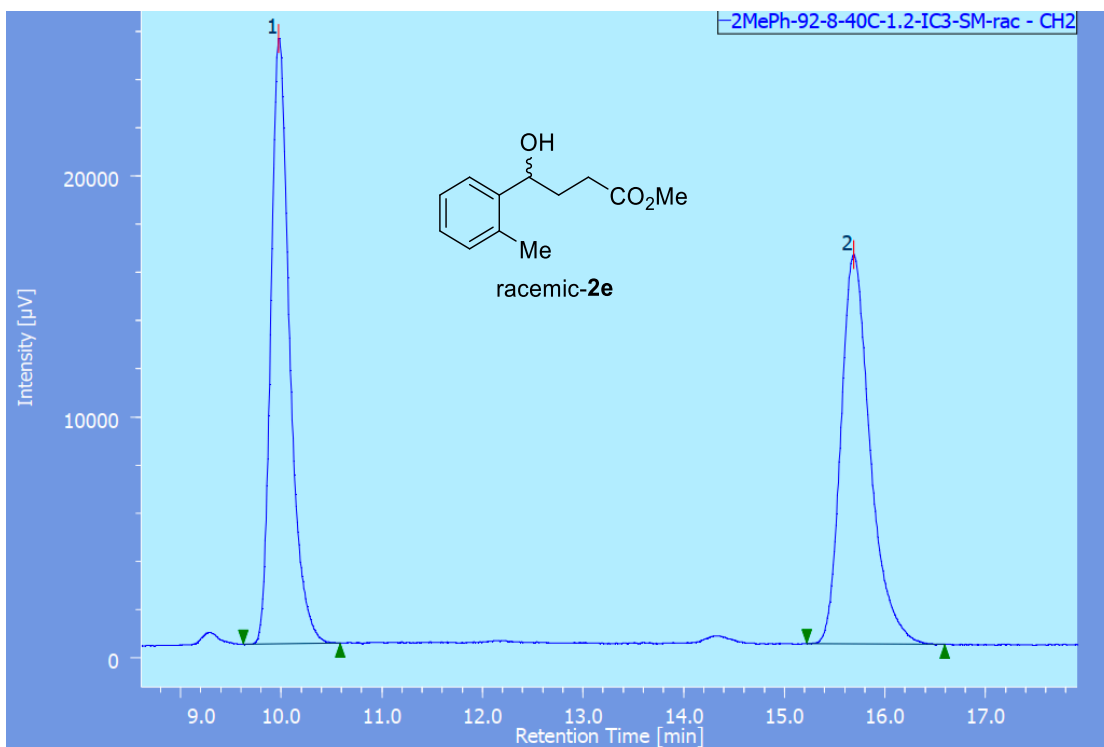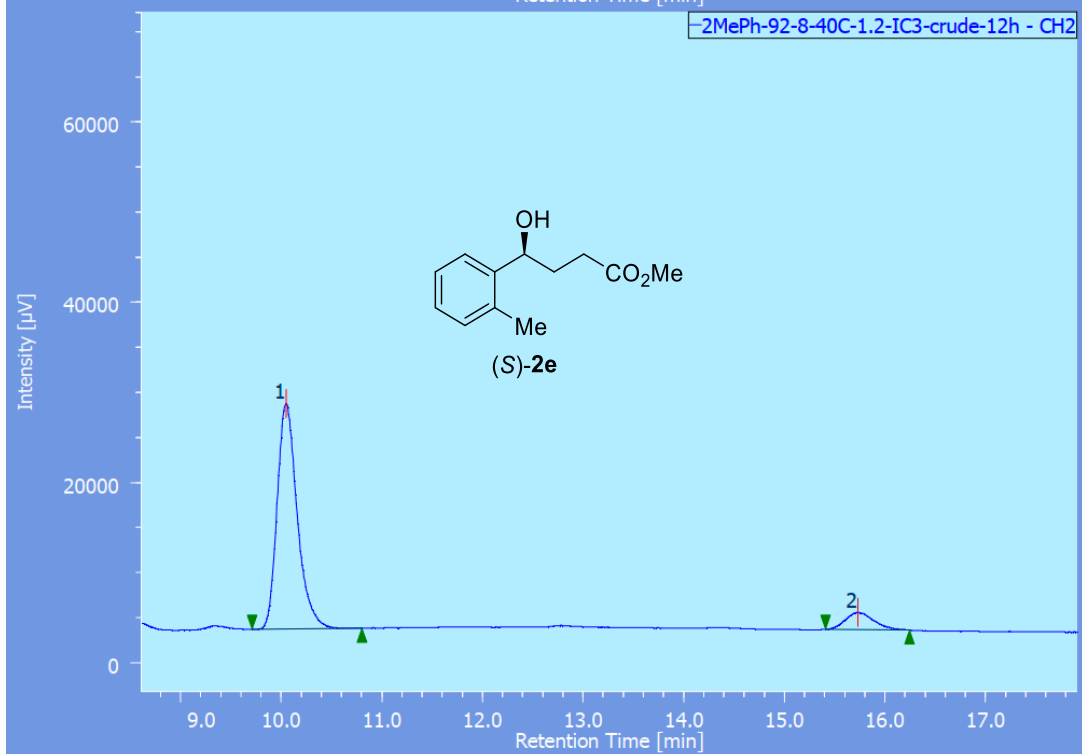

|              | Retention Time<br>1 (min) | Retention Time<br>2 (min) | Area<br>1 (%) | Area<br>2 (%) |
|--------------|---------------------------|---------------------------|---------------|---------------|
| racemic-2e   | 9.9                       | 15.6                      | 50.0          | 50.0          |
| recovered-2e | 10.0                      | 15.7                      | 90.2          | 9.8           |

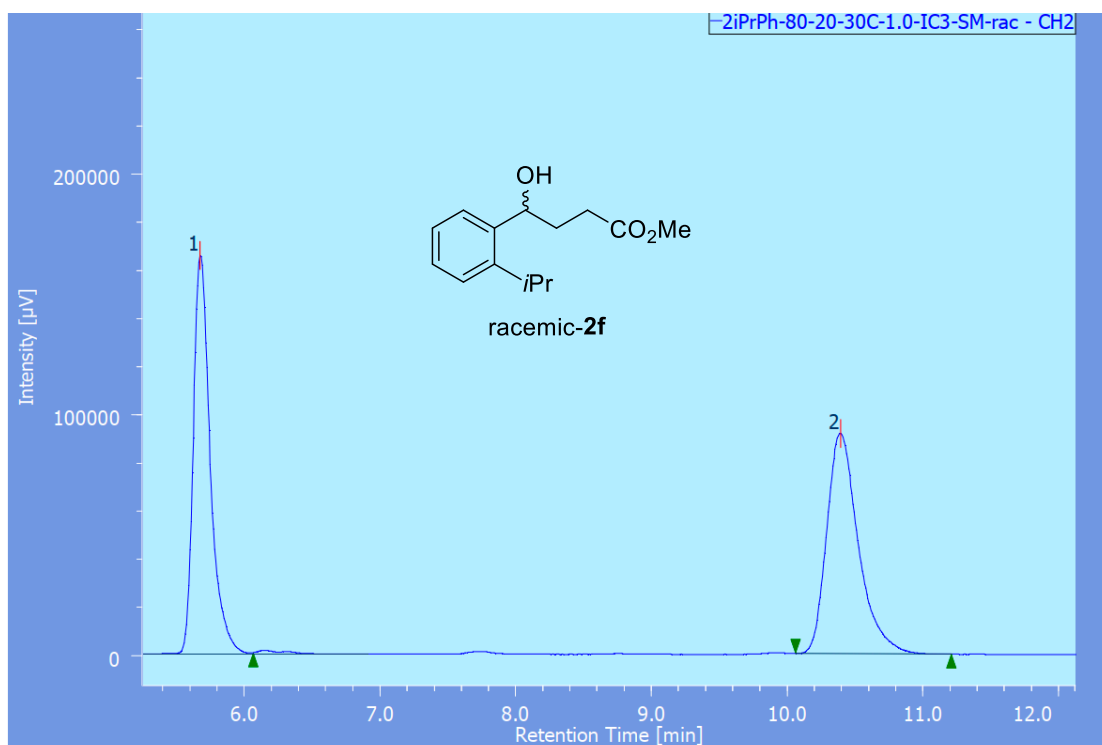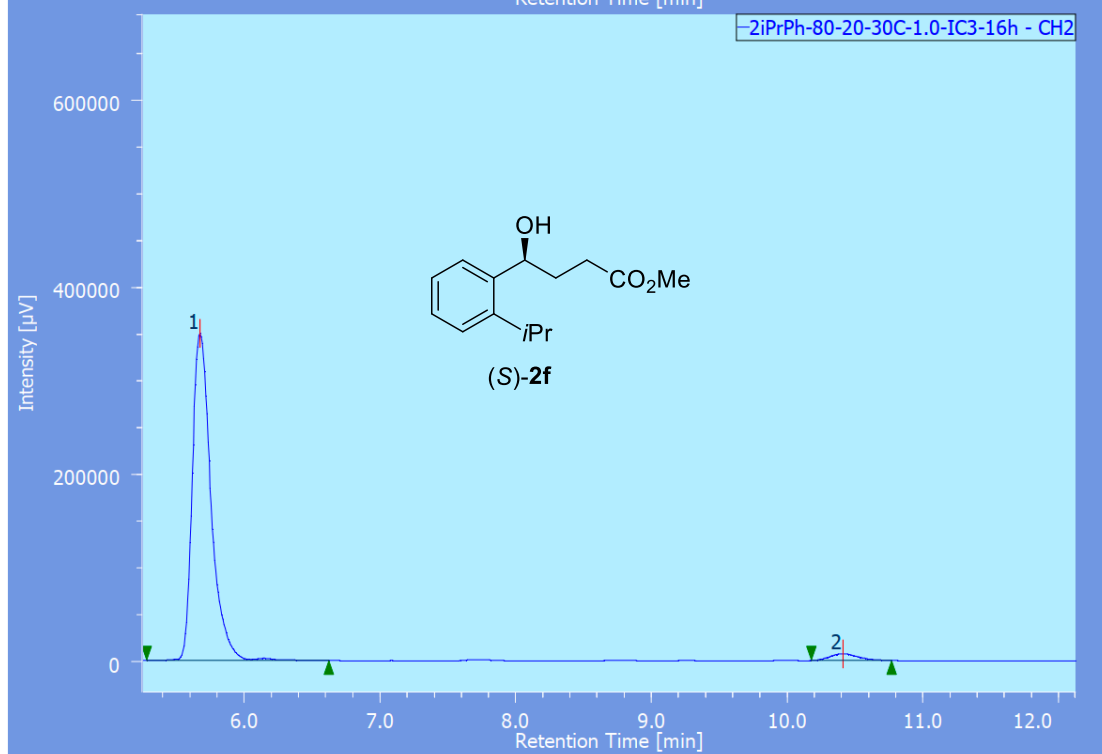

|              | Retention Time<br>1 (min) | Retention Time<br>2 (min) | Area<br>1 (%) | Area<br>2 (%) |
|--------------|---------------------------|---------------------------|---------------|---------------|
| racemic-2f   | 5.6                       | 10.4                      | 49.2          | 50.8          |
| recovered-2f | 5.6                       | 10.4                      | 97.0          | 3.0           |

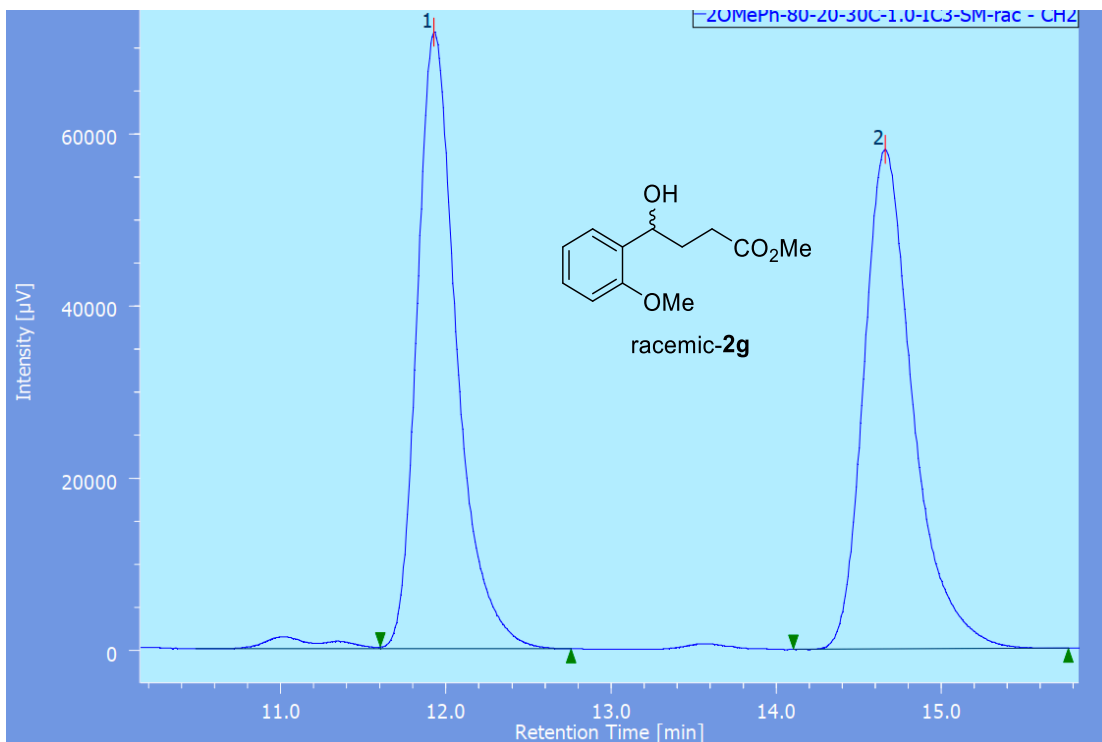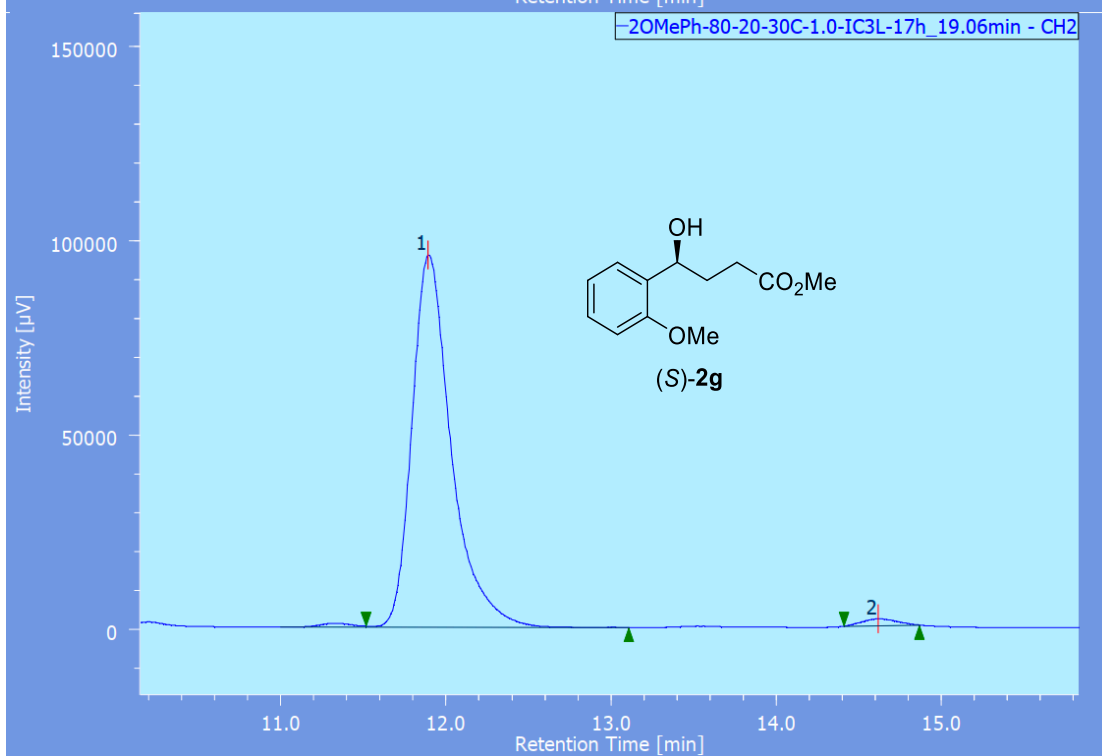

|                    | Retention Time<br>1 (min) | Retention Time<br>2 (min) | Area<br>1 (%) | Area<br>2 (%) |
|--------------------|---------------------------|---------------------------|---------------|---------------|
| <b>racemic-2g</b>  | 11.9                      | 14.6                      | 49.9          | 50.1          |
| <b>recoverd-2g</b> | 11.9                      | 14.6                      | 98.5          | 1.5           |

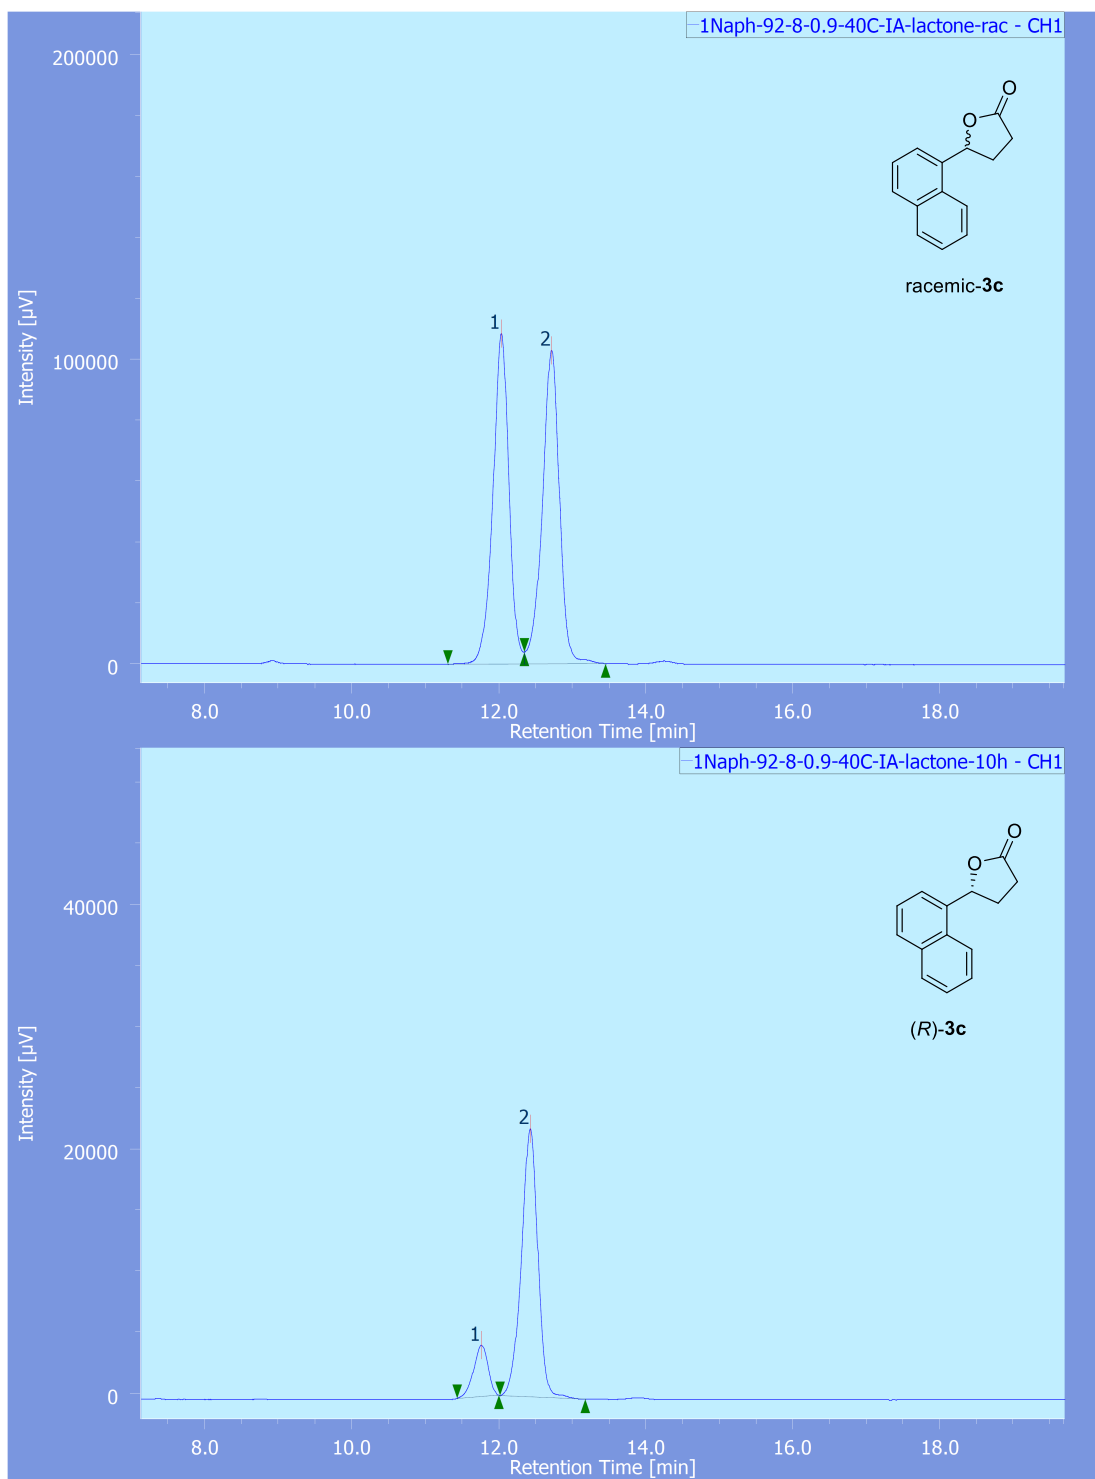

|                   | Retention Time<br>1 (min) | Retention Time<br>2 (min) | Area<br>1 (%) | Area<br>2 (%) |
|-------------------|---------------------------|---------------------------|---------------|---------------|
| <b>racemic-3c</b> | 12.0                      | 12.7                      | 49.7          | 50.3          |
| <b>lactone-3c</b> | 11.8                      | 12.4                      | 14.4          | 85.6          |

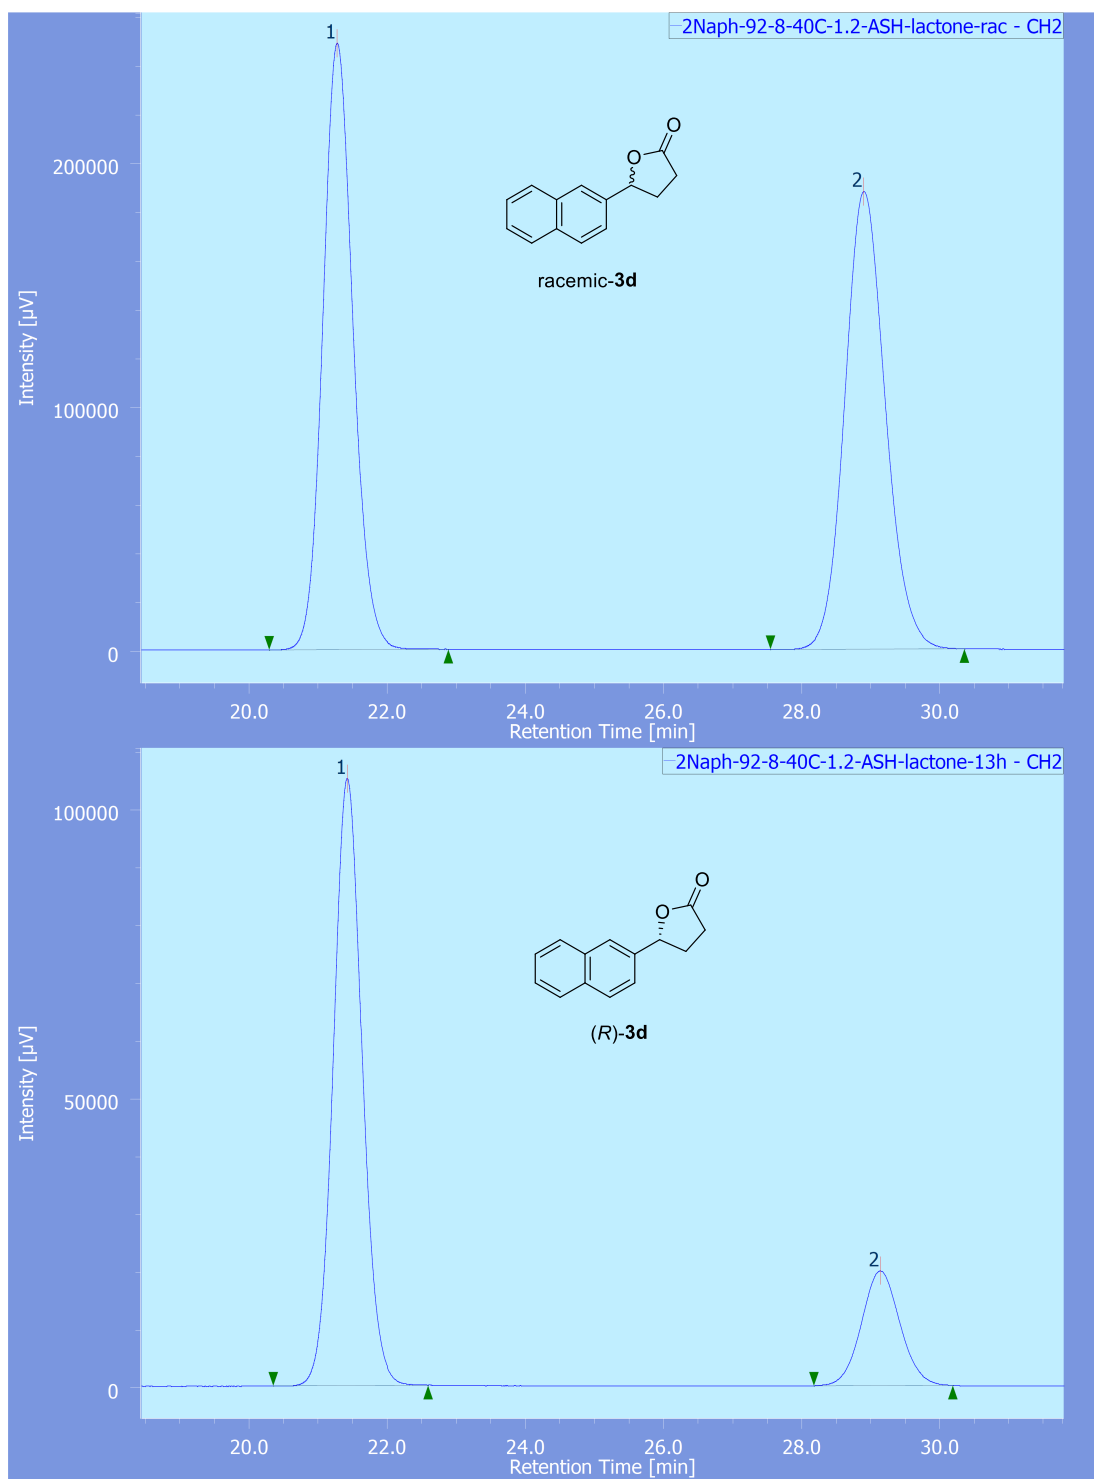

|            | Retention Time<br>1 (min) | Retention Time<br>2 (min) | Area<br>1 (%) | Area<br>2 (%) |
|------------|---------------------------|---------------------------|---------------|---------------|
| racemic-3d | 21.3                      | 28.9                      | 49.5          | 50.5          |
| lactone-3d | 21.4                      | 29.1                      | 79.8          | 20.2          |

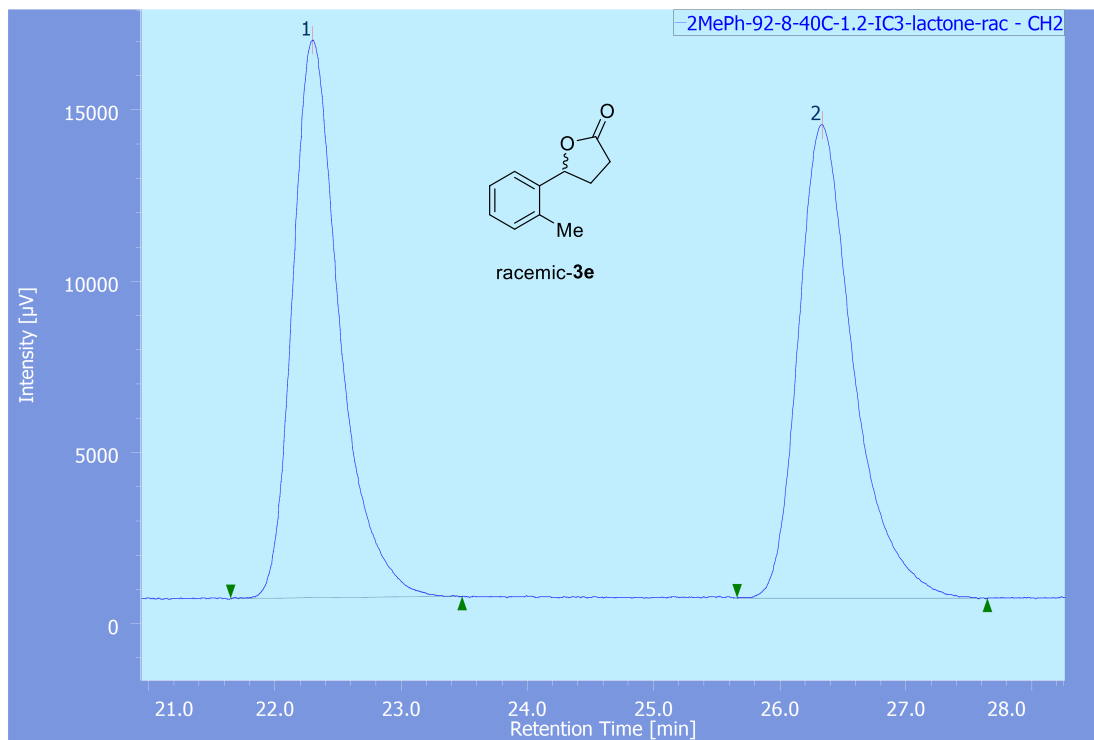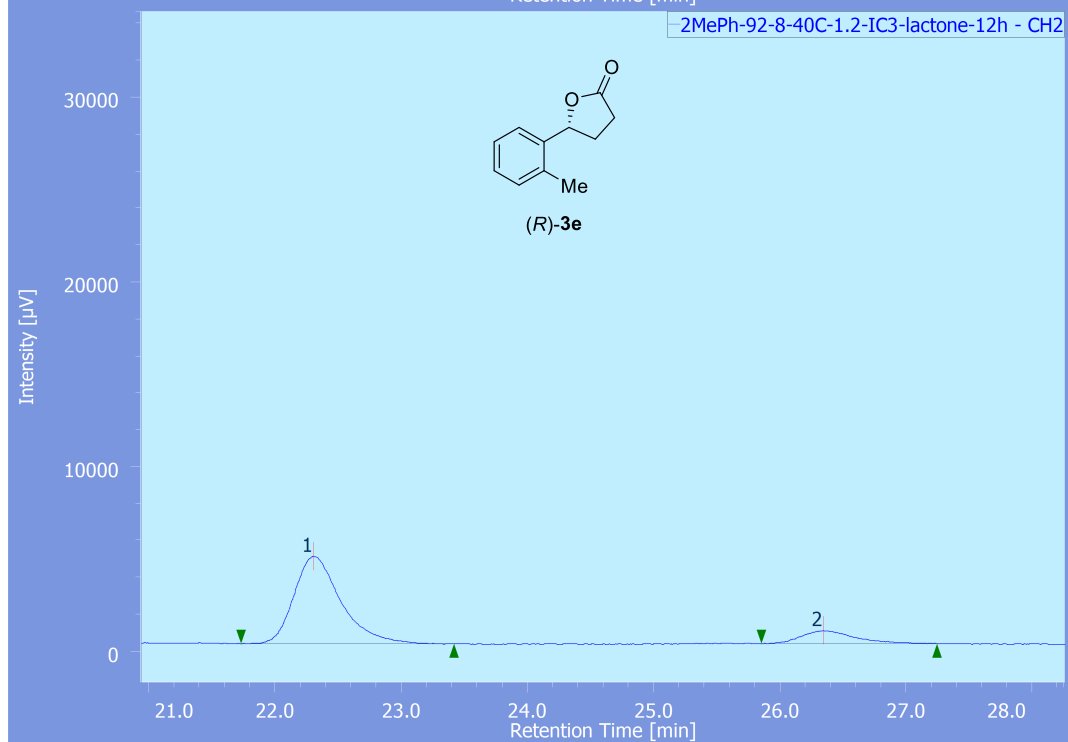

|            | Retention Time<br>1 (min) | Retention Time<br>2 (min) | Area<br>1 (%) | Area<br>2 (%) |
|------------|---------------------------|---------------------------|---------------|---------------|
| racemic-3e | 22.3                      | 26.3                      | 50.0          | 50.0          |
| lactone-3e | 22.3                      | 26.3                      | 85.5          | 14.5          |

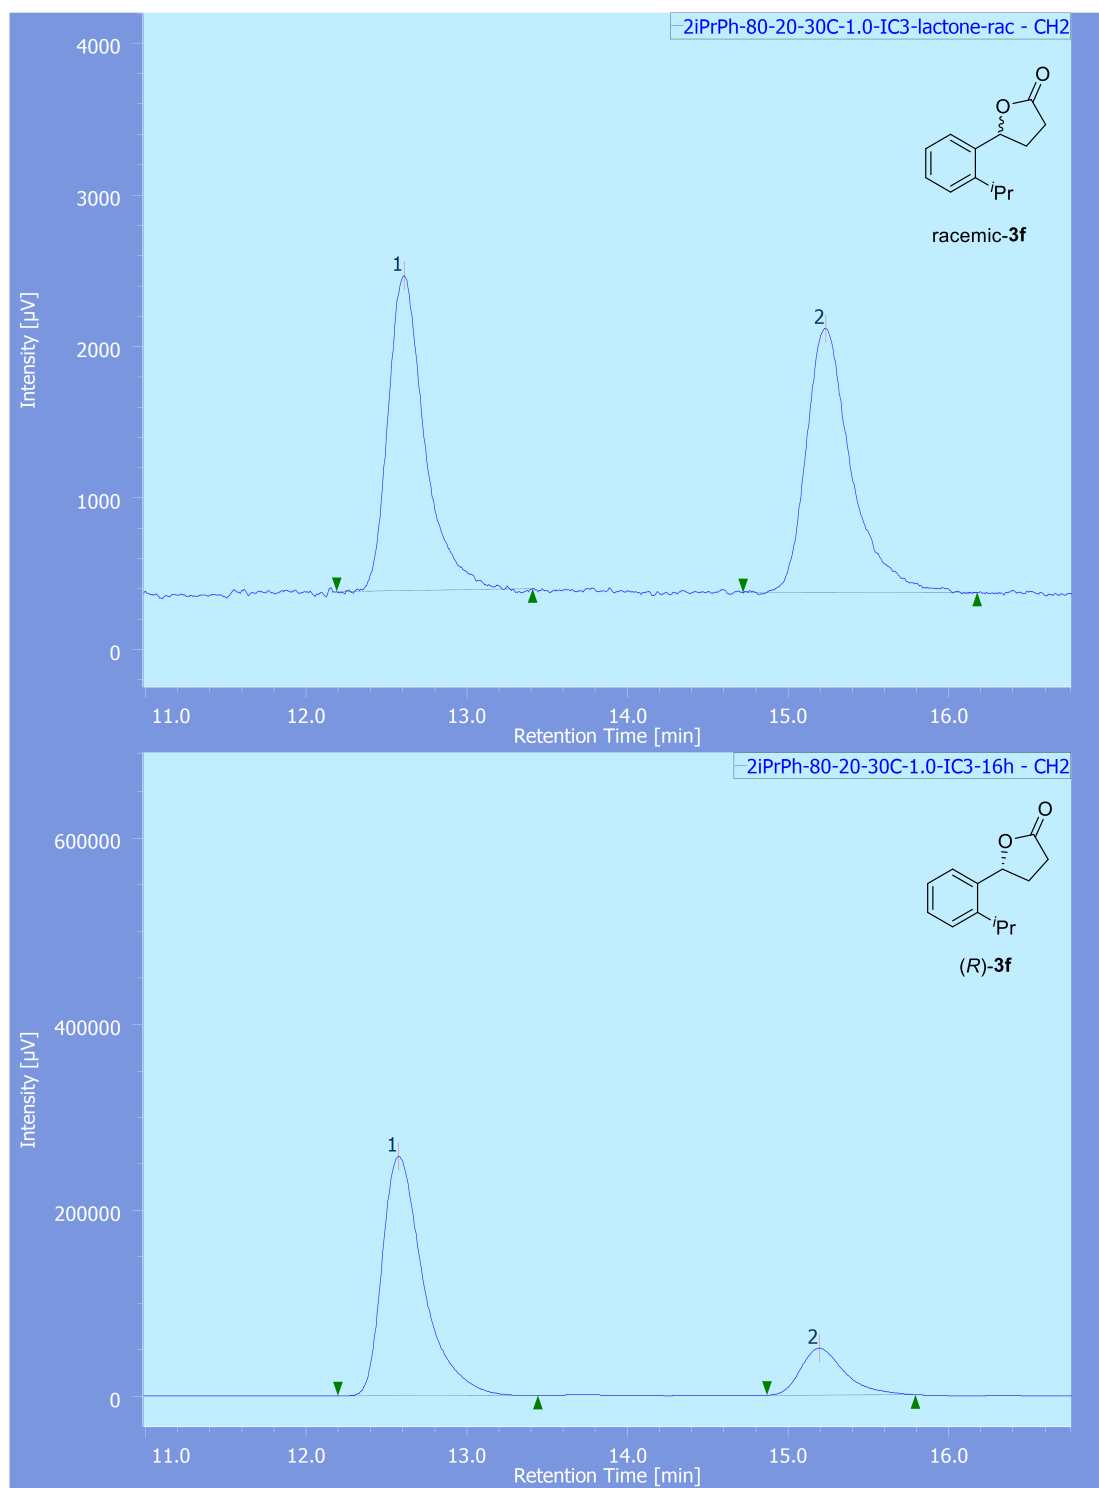

|                   | Retention Time<br>1 (min) | Retention Time<br>2 (min) | Area<br>1 (%) | Area<br>2 (%) |
|-------------------|---------------------------|---------------------------|---------------|---------------|
| <b>racemic-3f</b> | 12.6                      | 15.2                      | 49.3          | 50.7          |
| <b>lactone-3f</b> | 12.6                      | 15.2                      | 82.7          | 17.3          |

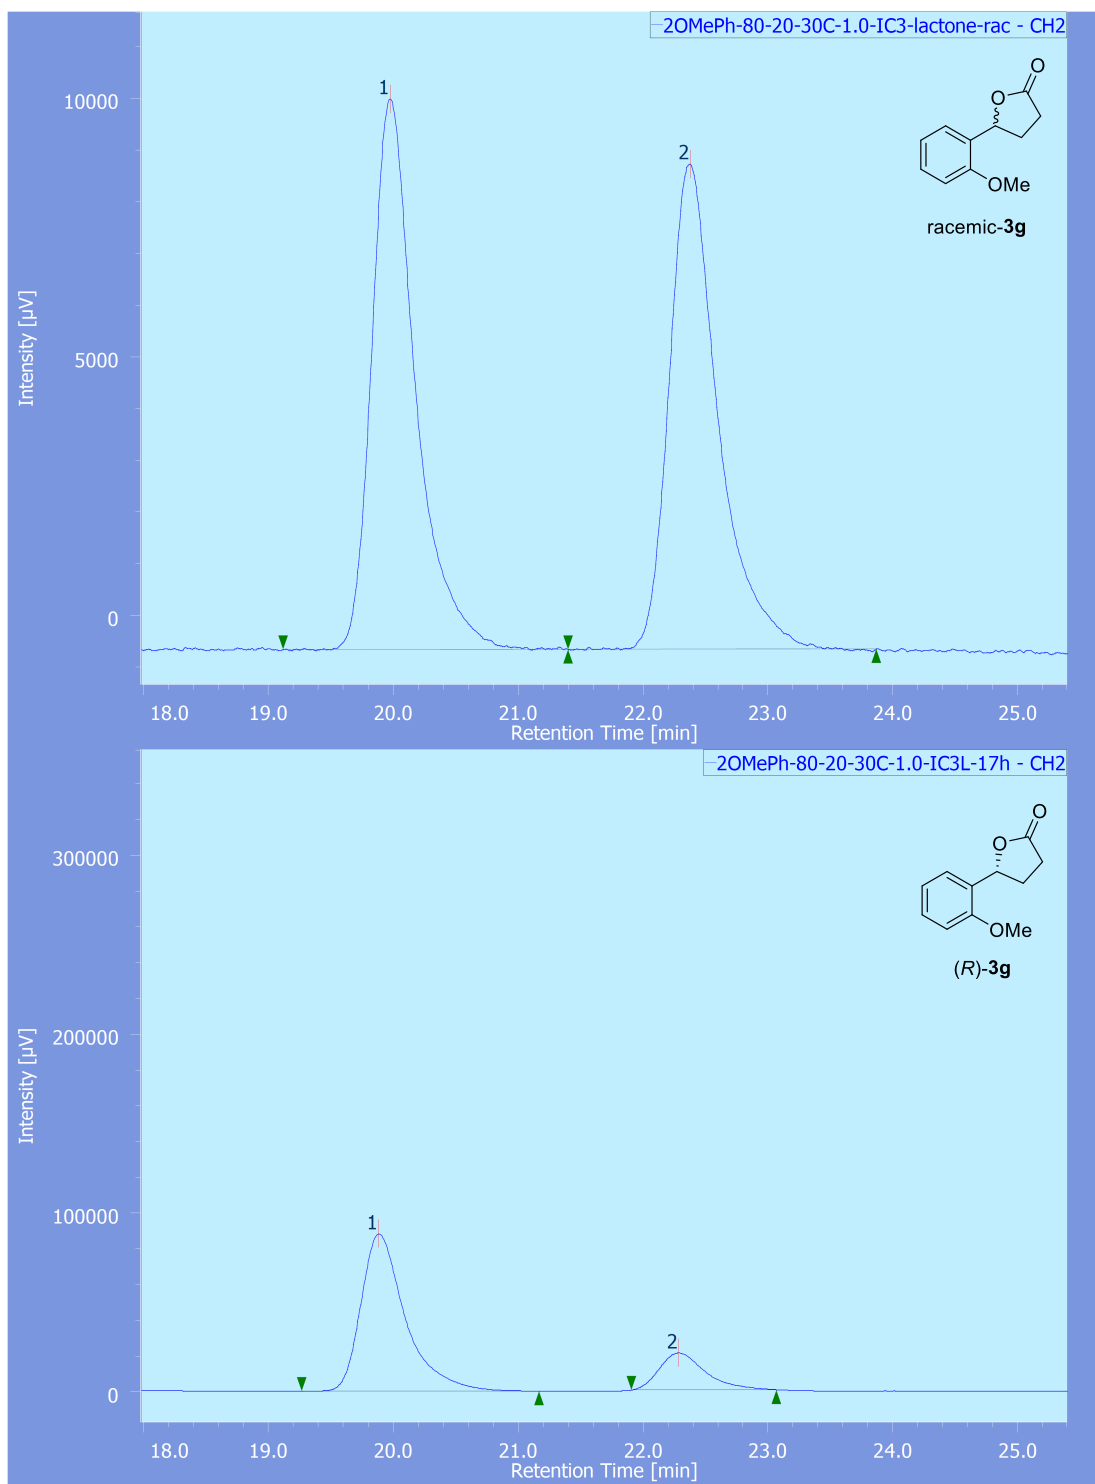

|            | Retention Time<br>1 (min) | Retention Time<br>2 (min) | Area<br>1 (%) | Area<br>2 (%) |
|------------|---------------------------|---------------------------|---------------|---------------|
| racemic-3f | 20.0                      | 22.4                      | 50.3          | 49.7          |
| lactone-3f | 19.9                      | 22.3                      | 80.3          | 19.7          |



## 8. DFT Calculation of Transition States of Model System

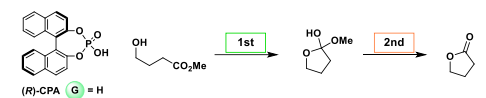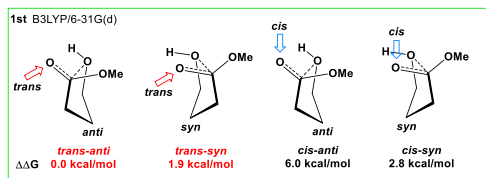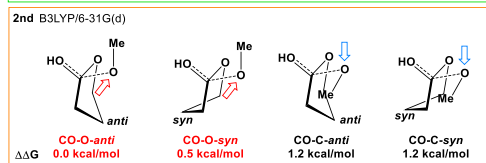

### TS-1st-trans-anti

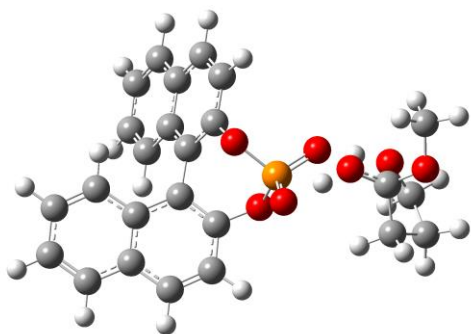

B3LYP/6-31G(d); E(B3LYP) = -1834.537960 hartree

Zero-point Energy Correction = 0.436800 hartree

Thermal Correction to Energy = 0.463820 hartree

Thermal correction to Enthalpy = 0.464764 hartree

Thermal correction to Gibbs Free Energy = 0.378190 hartree

Sum of electronic and Zero-point Energies = -1834.101159 hartree

Sum of electronic and thermal Energies = -1834.074139 hartree

Sum of electronic and thermal Enthalpies = -1834.073195 hartree

Sum of electronic and thermal Free Energies = -1834.159770 hartree

The number of Imaginary frequencies = 1

| Center Number | Atomic Number | Atomic Type | Coordinates (Angstroms) |           |           |
|---------------|---------------|-------------|-------------------------|-----------|-----------|
|               |               |             | X                       | Y         | Z         |
| 1             | 6             | 0           | -5.148308               | -0.344640 | -0.399759 |
| 2             | 8             | 0           | -4.465961               | 0.871495  | 0.604649  |
| 3             | 1             | 0           | -3.474228               | -0.798651 | -1.271946 |
| 4             | 6             | 0           | -4.668086               | 0.485180  | 1.983107  |
| 5             | 6             | 0           | -5.500373               | -0.808901 | 1.960914  |
| 6             | 6             | 0           | -5.143597               | -1.466661 | 0.626029  |
| 7             | 1             | 0           | -3.682995               | 0.326973  | 2.433911  |
| 8             | 1             | 0           | -6.569660               | -0.579563 | 1.988009  |
| 9             | 1             | 0           | -5.268008               | -1.448304 | 2.817378  |
| 10            | 1             | 0           | -5.861352               | -2.233170 | 0.321150  |
| 11            | 1             | 0           | -4.142159               | -1.906851 | 0.644826  |
| 12            | 8             | 0           | -4.388898               | -0.399077 | -1.480669 |
| 13            | 8             | 0           | -6.398529               | 0.100732  | -0.626483 |
| 14            | 6             | 0           | -6.543646               | 1.144040  | -1.605318 |
| 15            | 1             | 0           | -7.599347               | 1.416671  | -1.580331 |
| 16            | 1             | 0           | -6.266612               | 0.784521  | -2.598544 |

|    |    |   |           |           |           |
|----|----|---|-----------|-----------|-----------|
| 17 | 1  | 0 | -5.924905 | 2.003632  | -1.332670 |
| 18 | 1  | 0 | -3.343640 | 1.000352  | 0.431392  |
| 19 | 6  | 0 | 4.960865  | 2.125856  | 1.545515  |
| 20 | 6  | 0 | 3.998479  | 1.234455  | 1.125392  |
| 21 | 6  | 0 | 2.942994  | 1.640504  | 0.261889  |
| 22 | 6  | 0 | 2.888096  | 3.021753  | -0.125125 |
| 23 | 6  | 0 | 3.906359  | 3.910548  | 0.312768  |
| 24 | 6  | 0 | 4.926467  | 3.476248  | 1.126704  |
| 25 | 1  | 0 | 5.751135  | 1.788479  | 2.210802  |
| 26 | 1  | 0 | 4.034548  | 0.206489  | 1.466434  |
| 27 | 6  | 0 | 1.917842  | 0.737060  | -0.192913 |
| 28 | 6  | 0 | 1.800946  | 3.483814  | -0.913254 |
| 29 | 1  | 0 | 3.853992  | 4.950843  | -0.000078 |
| 30 | 1  | 0 | 5.695541  | 4.167778  | 1.459680  |
| 31 | 6  | 0 | 0.785755  | 2.633717  | -1.271834 |
| 32 | 6  | 0 | 0.849618  | 1.276013  | -0.894157 |
| 33 | 1  | 0 | 1.769608  | 4.530485  | -1.205005 |
| 34 | 6  | 0 | 1.936536  | -0.722924 | 0.106593  |
| 35 | 6  | 0 | 3.031577  | -1.581799 | -0.264337 |
| 36 | 6  | 0 | 0.839398  | -1.307753 | 0.721297  |
| 37 | 6  | 0 | 4.134456  | -1.130007 | -1.041685 |
| 38 | 6  | 0 | 3.004043  | -2.965118 | 0.118107  |
| 39 | 6  | 0 | 0.802984  | -2.668159 | 1.092984  |
| 40 | 6  | 0 | 5.163573  | -1.979495 | -1.383025 |
| 41 | 1  | 0 | 4.154452  | -0.100704 | -1.379940 |
| 42 | 6  | 0 | 4.090131  | -3.809656 | -0.236410 |
| 43 | 6  | 0 | 1.877888  | -3.474550 | 0.816970  |
| 44 | 6  | 0 | 5.152540  | -3.331182 | -0.967108 |
| 45 | 1  | 0 | 5.989101  | -1.607960 | -1.984167 |
| 46 | 1  | 0 | 4.056370  | -4.852054 | 0.071932  |
| 47 | 1  | 0 | 1.866685  | -4.522676 | 1.104939  |
| 48 | 1  | 0 | 5.973672  | -3.989240 | -1.237739 |
| 49 | 8  | 0 | -0.201792 | 0.457804  | -1.297203 |
| 50 | 15 | 0 | -1.266099 | -0.064884 | -0.173985 |
| 51 | 8  | 0 | -0.274648 | -0.535470 | 1.039300  |
| 52 | 8  | 0 | -2.065109 | 1.107988  | 0.394163  |
| 53 | 8  | 0 | -2.046264 | -1.211545 | -0.761971 |
| 54 | 1  | 0 | -0.074024 | 2.970264  | -1.840910 |
| 55 | 1  | 0 | -0.084636 | -3.042905 | 1.591093  |
| 56 | 1  | 0 | -5.171665 | 1.303367  | 2.505198  |

### TS-1st-trans-syn

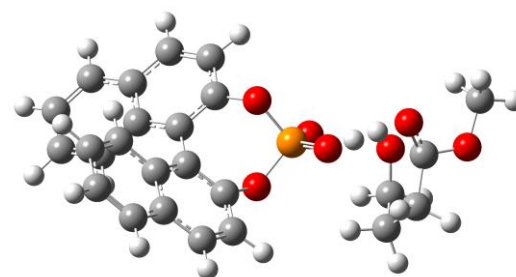

B3LYP/6-31G(d); E(B3LYP) = -1834.535833 hartree

Zero-point Energy Correction = 0.437361 hartree

Thermal Correction to Energy = 0.464305 hartree

Thermal correction to Enthalpy = 0.465250 hartree

Thermal correction to Gibbs Free Energy = 0.379105 hartree

Sum of electronic and Zero-point Energies = -1834.098472 hartree

Sum of electronic and thermal Energies = -1834.071528 hartree

Sum of electronic and thermal Enthalpies = -1834.070584 hartree

Sum of electronic and thermal Free Energies = -1834.156729 hartree

The number of Imaginary frequencies = 1

| Center Number | Atomic Number | Atomic Type | Coordinates (Angstroms) |   |   |
|---------------|---------------|-------------|-------------------------|---|---|
|               |               |             | X                       | Y | Z |

|    |    |   |           |           |           |
|----|----|---|-----------|-----------|-----------|
| 1  | 1  | 0 | -3.559042 | -0.791615 | -1.295271 |
| 2  | 6  | 0 | 4.902646  | 2.096559  | 1.580809  |
| 3  | 6  | 0 | 3.940394  | 1.215855  | 1.138353  |
| 4  | 6  | 0 | 2.918716  | 1.629824  | 0.238696  |
| 5  | 6  | 0 | 2.897292  | 3.008031  | -0.162197 |
| 6  | 6  | 0 | 3.914706  | 3.885495  | 0.299930  |
| 7  | 6  | 0 | 4.901926  | 3.443450  | 1.149491  |
| 8  | 1  | 0 | 5.666687  | 1.753443  | 2.273260  |
| 9  | 1  | 0 | 3.950404  | 0.190493  | 1.488852  |
| 10 | 6  | 0 | 1.894199  | 0.737946  | -0.239595 |
| 11 | 6  | 0 | 1.842961  | 3.479027  | -0.988700 |
| 12 | 1  | 0 | 3.888198  | 4.923516  | -0.023563 |
| 13 | 1  | 0 | 5.670652  | 4.126391  | 1.500537  |
| 14 | 6  | 0 | 0.826734  | 2.640961  | -1.371961 |
| 15 | 6  | 0 | 0.857551  | 1.286233  | -0.979763 |
| 16 | 1  | 0 | 1.837065  | 4.523256  | -1.290652 |
| 17 | 6  | 0 | 1.879225  | -0.718956 | 0.074917  |
| 18 | 6  | 0 | 2.971050  | -1.598877 | -0.253540 |
| 19 | 6  | 0 | 0.754218  | -1.279224 | 0.662070  |
| 20 | 6  | 0 | 4.104561  | -1.172641 | -1.000750 |
| 21 | 6  | 0 | 2.909911  | -2.977381 | 0.142083  |
| 22 | 6  | 0 | 0.685273  | -2.635163 | 1.045790  |
| 23 | 6  | 0 | 5.130452  | -2.041436 | -1.300613 |
| 24 | 1  | 0 | 4.151382  | -0.147454 | -1.348709 |
| 25 | 6  | 0 | 3.993081  | -3.842352 | -0.169438 |
| 26 | 6  | 0 | 1.754826  | -3.461469 | 0.811007  |
| 27 | 6  | 0 | 5.085264  | -3.388190 | -0.871184 |
| 28 | 1  | 0 | 5.980119  | -1.689122 | -1.879275 |
| 29 | 1  | 0 | 3.933314  | -4.880708 | 0.148463  |
| 30 | 1  | 0 | 1.717853  | -4.506174 | 1.109112  |
| 31 | 1  | 0 | 5.904072  | -4.061648 | -1.108977 |
| 32 | 8  | 0 | -0.193734 | 0.479828  | -1.406287 |
| 33 | 15 | 0 | -1.302644 | -0.001192 | -0.308209 |
| 34 | 8  | 0 | -0.355290 | -0.486037 | 0.939183  |
| 35 | 8  | 0 | -2.084803 | 1.194318  | 0.228642  |
| 36 | 8  | 0 | -2.089247 | -1.141372 | -0.900698 |
| 37 | 1  | 0 | -0.009531 | 2.984950  | -1.970825 |
| 38 | 1  | 0 | -0.222686 | -2.990970 | 1.520675  |
| 39 | 6  | 0 | -5.143680 | -0.380439 | -0.256057 |
| 40 | 8  | 0 | -4.494131 | 1.008860  | 0.516292  |
| 41 | 6  | 0 | -4.638512 | 0.741716  | 1.924546  |
| 42 | 6  | 0 | -4.907088 | -1.431418 | 0.842670  |
| 43 | 1  | 0 | -5.875730 | -1.888711 | 1.058698  |
| 44 | 1  | 0 | -4.237717 | -2.198832 | 0.449989  |
| 45 | 8  | 0 | -4.517592 | -0.461265 | -1.417587 |
| 46 | 8  | 0 | -6.453893 | -0.078650 | -0.353282 |
| 47 | 6  | 0 | -6.827026 | 0.828986  | -1.405815 |
| 48 | 1  | 0 | -7.892539 | 1.011778  | -1.261985 |
| 49 | 1  | 0 | -6.646156 | 0.379587  | -2.384432 |
| 50 | 1  | 0 | -6.266264 | 1.763208  | -1.314416 |
| 51 | 1  | 0 | -3.392911 | 1.104762  | 0.305974  |
| 52 | 1  | 0 | -5.672867 | 0.972948  | 2.195116  |
| 53 | 6  | 0 | -4.311050 | -0.743669 | 2.089448  |
| 54 | 1  | 0 | -4.715402 | -1.150987 | 3.021025  |
| 55 | 1  | 0 | -3.224953 | -0.875922 | 2.109163  |
| 56 | 1  | 0 | -3.960539 | 1.403019  | 2.469091  |

**TS-1st-cis-anti**

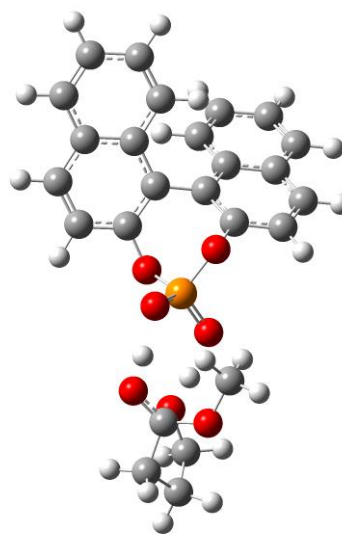

B3LYP/6-31G(d); E(B3LYP) = -1834.52837806 hartree  
 Zero-point Energy Correction = 0.436960 hartree  
 Thermal Correction to Energy = 0.464116 hartree  
 Thermal correction to Enthalpy = 0.465060 hartree  
 Thermal correction to Gibbs Free Energy = 0.378169 hartree  
 Sum of electronic and Zero-point Energies = -1834.091418 hartree  
 Sum of electronic and thermal Energies = -1834.064262 hartree  
 Sum of electronic and thermal Enthalpies = -1834.063318 hartree  
 Sum of electronic and thermal Free Energies = -1834.150209 hartree  
 The number of Imaginary frequencies = 1

| Center Number | Atomic Number | Atomic Type | Coordinates (Angstroms) |           |           |
|---------------|---------------|-------------|-------------------------|-----------|-----------|
|               |               |             | X                       | Y         | Z         |
| 1             | 6             | 0           | 5.175402                | -0.626373 | 0.199925  |
| 2             | 8             | 0           | 4.329858                | 0.31360   | -1.041939 |
| 3             | 1             | 0           | 3.455516                | -1.543657 | 0.566402  |
| 4             | 6             | 0           | 5.285895                | 1.198784  | -1.669766 |
| 5             | 6             | 0           | 6.673603                | 0.693853  | -1.209109 |
| 6             | 6             | 0           | 6.443920                | -0.708853 | -0.624430 |
| 7             | 1             | 0           | 5.155817                | 1.105893  | -2.752844 |
| 8             | 1             | 0           | 7.079970                | 1.350264  | -0.434841 |
| 9             | 1             | 0           | 7.387079                | 0.671130  | -2.037588 |
| 10            | 1             | 0           | 7.274150                | -1.029650 | 0.011197  |
| 11            | 1             | 0           | 6.284755                | -1.457411 | -1.404172 |
| 12            | 8             | 0           | 4.451720                | -1.708126 | 0.319295  |
| 13            | 8             | 0           | 5.343592                | 0.215210  | 1.237803  |
| 14            | 6             | 0           | 4.342477                | 0.319648  | 2.269187  |
| 15            | 1             | 0           | 4.850019                | 0.797945  | 3.107594  |
| 16            | 1             | 0           | 3.973912                | -0.665251 | 2.560557  |
| 17            | 1             | 0           | 3.517729                | 0.942103  | 1.917718  |
| 18            | 1             | 0           | 3.397073                | 0.757168  | -0.719205 |
| 19            | 6             | 0           | -4.905907               | 2.202511  | -1.539569 |
| 20            | 6             | 0           | -3.953108               | 1.291206  | -1.140828 |
| 21            | 6             | 0           | -2.917689               | 1.654209  | -0.234676 |
| 22            | 6             | 0           | -2.872474               | 3.015276  | 0.219184  |
| 23            | 6             | 0           | -3.880518               | 3.925051  | -0.198754 |
| 24            | 6             | 0           | -4.881573               | 3.531283  | -1.055820 |
| 25            | 1             | 0           | -5.680588               | 1.898039  | -2.238245 |
| 26            | 1             | 0           | -3.981265               | 0.280782  | -1.531295 |
| 27            | 6             | 0           | -1.903384               | 0.728446  | 0.199325  |
| 28            | 6             | 0           | -1.803808               | 3.437936  | 1.053120  |
| 29            | 1             | 0           | -3.835405               | 4.949122  | 0.164758  |
| 30            | 1             | 0           | -5.642939               | 4.238635  | -1.372986 |
| 31            | 6             | 0           | -0.797731               | 2.569864  | 1.393659  |
| 32            | 6             | 0           | -0.851180               | 1.231069  | 0.950809  |

|    |    |   |           |           |           |
|----|----|---|-----------|-----------|-----------|
| 33 | 1  | 0 | -1.778883 | 4.469510  | 1.395140  |
| 34 | 6  | 0 | -1.914492 | -0.714288 | -0.174711 |
| 35 | 6  | 0 | -3.015839 | -1.591751 | 0.125927  |
| 36 | 6  | 0 | -0.802194 | -1.264000 | -0.794949 |
| 37 | 6  | 0 | -4.137595 | -1.181934 | 0.899547  |
| 38 | 6  | 0 | -2.976095 | -2.953320 | -0.327053 |
| 39 | 6  | 0 | -0.754307 | -2.603233 | -1.236461 |
| 40 | 6  | 0 | -5.172254 | -2.049156 | 1.172889  |
| 41 | 1  | 0 | -4.168084 | -0.171177 | 1.289191  |
| 42 | 6  | 0 | -4.067748 | -3.816451 | -0.041060 |
| 43 | 6  | 0 | -1.833232 | -3.424040 | -1.026244 |
| 44 | 6  | 0 | -5.147986 | -3.377745 | 0.688621  |
| 45 | 1  | 0 | -6.012689 | -1.710016 | 1.772606  |
| 46 | 1  | 0 | -4.024167 | -4.841611 | -0.401604 |
| 47 | 1  | 0 | -1.813035 | -4.455892 | -1.367643 |
| 48 | 1  | 0 | -5.973402 | -4.050055 | 0.906101  |
| 49 | 8  | 0 | 0.189857  | 0.396096  | 1.341949  |
| 50 | 15 | 0 | 1.282082  | -0.082194 | 0.221094  |
| 51 | 8  | 0 | 0.314103  | -0.472395 | -1.042777 |
| 52 | 8  | 0 | 2.128012  | 1.096428  | -0.237541 |
| 53 | 8  | 0 | 1.994271  | -1.283267 | 0.795041  |
| 54 | 1  | 0 | 0.048346  | 2.878389  | 1.998168  |
| 55 | 1  | 0 | 0.145249  | -2.950207 | -1.733298 |
| 56 | 1  | 0 | 5.105209  | 2.238458  | -1.379365 |

**TS-1st-cis-syn**

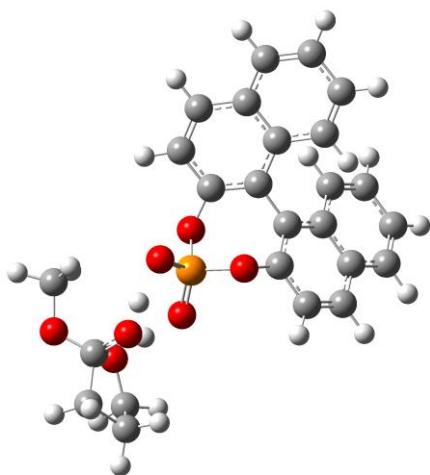

B3LYP/6-31G(d); E(B3LYP) = -1834.532908 hartree

Zero-point Energy Correction = 0.436561 hartree

Thermal Correction to Energy = 0.463636 hartree

Thermal correction to Enthalpy = 0.464580 hartree

Thermal correction to Gibbs Free Energy = 0.377642 hartree

Sum of electronic and Zero-point Energies = -1834.096348 hartree

Sum of electronic and thermal Energies = -1834.069273 hartree

Sum of electronic and thermal Enthalpies = -1834.068329 hartree

Sum of electronic and thermal Free Energies = -1834.155267 hartree

The number of Imaginary frequencies = 1

| Center Number | Atomic Number | Atomic Type | Coordinates (Angstroms) |           |           |
|---------------|---------------|-------------|-------------------------|-----------|-----------|
|               |               |             | X                       | Y         | Z         |
| 1             | 1             | 0           | 3.476292                | -1.011652 | 0.979160  |
| 2             | 6             | 0           | -4.938859               | 2.254119  | -1.418093 |
| 3             | 6             | 0           | -3.986865               | 1.326915  | -1.055835 |
| 4             | 6             | 0           | -2.877882               | 1.687574  | -0.240468 |
| 5             | 6             | 0           | -2.758962               | 3.061370  | 0.158407  |
| 6             | 6             | 0           | -3.767715               | 3.987972  | -0.218668 |
| 7             | 6             | 0           | -4.840087               | 3.597188  | -0.986164 |

|    |    |   |           |           |           |
|----|----|---|-----------|-----------|-----------|
| 8  | 1  | 0 | -5.770925 | 1.950961  | -2.047949 |
| 9  | 1  | 0 | -4.072810 | 0.305208  | -1.406626 |
| 10 | 6  | 0 | -1.862656 | 0.745437  | 0.154251  |
| 11 | 6  | 0 | -1.620087 | 3.477918  | 0.897259  |
| 12 | 1  | 0 | -3.665979 | 5.021946  | 0.102908  |
| 13 | 1  | 0 | -5.601424 | 4.317276  | -1.273235 |
| 14 | 6  | 0 | -0.617234 | 2.590754  | 1.195472  |
| 15 | 6  | 0 | -0.742930 | 1.240249  | 0.806546  |
| 16 | 1  | 0 | -1.540554 | 4.519079  | 1.199580  |
| 17 | 6  | 0 | -1.947247 | -0.709692 | -0.156509 |
| 18 | 6  | 0 | -3.051943 | -1.534200 | 0.260699  |
| 19 | 6  | 0 | -0.902415 | -1.325194 | -0.829492 |
| 20 | 6  | 0 | -4.098058 | -1.053359 | 1.096795  |
| 21 | 6  | 0 | -3.091721 | -2.913414 | -0.135189 |
| 22 | 6  | 0 | -0.932734 | -2.681691 | -1.216192 |
| 23 | 6  | 0 | -5.137277 | -1.871002 | 1.482587  |
| 24 | 1  | 0 | -4.065400 | -0.027711 | 1.445026  |
| 25 | 6  | 0 | -4.187103 | -3.724222 | 0.266368  |
| 26 | 6  | 0 | -2.020399 | -3.453398 | -0.894817 |
| 27 | 6  | 0 | -5.194017 | -3.217747 | 1.054580  |
| 28 | 1  | 0 | -5.918142 | -1.478058 | 2.128187  |
| 29 | 1  | 0 | -4.204964 | -4.763796 | -0.052686 |
| 30 | 1  | 0 | -2.060806 | -4.497754 | -1.193731 |
| 31 | 1  | 0 | -6.022701 | -3.850296 | 1.360752  |
| 32 | 8  | 0 | 0.298338  | 0.384818  | 1.150685  |
| 33 | 15 | 0 | 1.288508  | -0.169619 | -0.027496 |
| 34 | 8  | 0 | 0.220519  | -0.588602 | -1.193370 |
| 35 | 8  | 0 | 2.119529  | 0.966626  | -0.614190 |
| 36 | 8  | 0 | 2.040563  | -1.357072 | 0.518842  |
| 37 | 1  | 0 | -0.084827 | -3.080406 | -1.762504 |
| 38 | 1  | 0 | 0.279023  | 2.891723  | 1.727084  |
| 39 | 6  | 0 | 5.265329  | -0.450861 | 0.294488  |
| 40 | 8  | 0 | 4.384190  | -0.628046 | 1.265993  |
| 41 | 8  | 0 | 5.652648  | -1.490228 | -0.466044 |
| 42 | 6  | 0 | 4.704955  | -2.532126 | -0.754381 |
| 43 | 1  | 0 | 5.267623  | -3.278140 | -1.316078 |
| 44 | 1  | 0 | 4.310352  | -2.970582 | 0.165364  |
| 45 | 1  | 0 | 3.880338  | -2.146827 | -1.358645 |
| 46 | 8  | 0 | 4.519396  | 0.637180  | -0.848113 |
| 47 | 1  | 0 | 3.412816  | 0.735966  | -0.726700 |
| 48 | 6  | 0 | 5.901668  | 1.881127  | 0.632976  |
| 49 | 1  | 0 | 5.230081  | 2.061189  | 1.478524  |
| 50 | 1  | 0 | 6.706007  | 2.622147  | 0.666883  |
| 51 | 6  | 0 | 6.427873  | 0.444130  | 0.685230  |
| 52 | 1  | 0 | 7.241188  | 0.288956  | -0.029753 |
| 53 | 1  | 0 | 6.771683  | 0.153265  | 1.681364  |
| 54 | 6  | 0 | 5.125747  | 1.937054  | -0.685004 |
| 55 | 1  | 0 | 4.335164  | 2.692364  | -0.695780 |
| 56 | 1  | 0 | 5.792595  | 2.102605  | -1.538227 |

**TS-2nd-CO-O-anti**

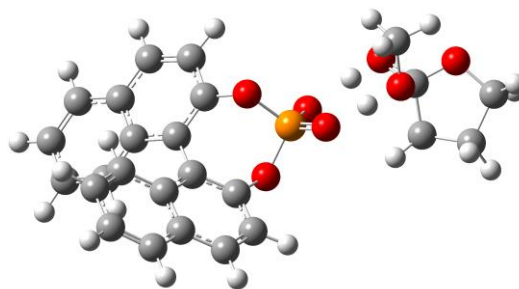

B3LYP/6-31G(d); E(B3LYP) = -1834.534054 hartree

Zero-point Energy Correction = 0.437237 hartree

Thermal Correction to Energy = 0.464550 hartree

Thermal correction to Enthalpy = 0.465494 hartree

Thermal correction to Gibbs Free Energy = 0.377908 hartree

Sum of electronic and Zero-point Energies = -1834.096817 hartree  
 Sum of electronic and thermal Energies = -1834.069504 hartree  
 Sum of electronic and thermal Enthalpies = -1834.068560 hartree  
 Sum of electronic and thermal Free Energies = -1834.156146 hartree  
 The number of Imaginary frequencies = 1

| Center Number | Atomic Number | Atomic Type | Coordinates (Angstroms) |           |           |
|---------------|---------------|-------------|-------------------------|-----------|-----------|
|               |               |             | X                       | Y         | Z         |
| 1             | 6             | 0           | -5.040109               | -0.563826 | -0.071115 |
| 2             | 8             | 0           | -6.344523               | -0.653852 | 0.272648  |
| 3             | 8             | 0           | -4.448190               | 0.680937  | 0.967404  |
| 4             | 6             | 0           | -7.142746               | 0.265124  | -0.517926 |
| 5             | 6             | 0           | -6.157706               | 1.048423  | -1.405034 |
| 6             | 6             | 0           | -4.923161               | 0.137187  | -1.417745 |
| 7             | 1             | 0           | -7.842065               | -0.345542 | -1.097988 |
| 8             | 1             | 0           | -5.911369               | 2.010319  | -0.948723 |
| 9             | 1             | 0           | -6.563225               | 1.233177  | -2.403144 |
| 10            | 1             | 0           | -3.974824               | 0.659515  | -1.541599 |
| 11            | 1             | 0           | -4.990998               | -0.640062 | -2.187360 |
| 12            | 8             | 0           | -4.370185               | -1.654577 | 0.227059  |
| 13            | 1             | 0           | -3.413585               | -1.591074 | -0.139118 |
| 14            | 6             | 0           | -4.565056               | 0.351099  | 2.363810  |
| 15            | 1             | 0           | -5.624520               | 0.332072  | 2.622816  |
| 16            | 1             | 0           | -4.050486               | 1.132016  | 2.927783  |
| 17            | 1             | 0           | -4.113780               | -0.623857 | 2.569379  |
| 18            | 1             | 0           | -3.384093               | 0.839558  | 0.738443  |
| 19            | 6             | 0           | 4.998076                | 2.207437  | 1.422407  |
| 20            | 6             | 0           | 4.037444                | 1.293752  | 1.048812  |
| 21            | 6             | 0           | 2.948969                | 1.667340  | 0.211828  |
| 22            | 6             | 0           | 2.859613                | 3.040491  | -0.196918 |
| 23            | 6             | 0           | 3.876605                | 3.952849  | 0.192683  |
| 24            | 6             | 0           | 4.928864                | 3.549332  | 0.981132  |
| 25            | 1             | 0           | 5.814009                | 1.894484  | 2.068386  |
| 26            | 1             | 0           | 4.100443                | 0.272902  | 1.406821  |
| 27            | 6             | 0           | 1.925723                | 0.739120  | -0.195000 |
| 28            | 6             | 0           | 1.740616                | 3.470921  | -0.957741 |
| 29            | 1             | 0           | 3.797437                | 4.986423  | -0.136487 |
| 30            | 1             | 0           | 5.696769                | 4.258683  | 1.277344  |
| 31            | 6             | 0           | 0.729396                | 2.597884  | -1.269039 |
| 32            | 6             | 0           | 0.826465                | 1.247503  | -0.871401 |
| 33            | 1             | 0           | 1.682500                | 4.511661  | -1.266317 |
| 34            | 6             | 0           | 1.979332                | -0.714184 | 0.131045  |
| 35            | 6             | 0           | 3.075511                | -1.563048 | -0.257935 |
| 36            | 6             | 0           | 0.911417                | -1.302130 | 0.792589  |
| 37            | 6             | 0           | 4.145774                | -1.110451 | -1.079150 |
| 38            | 6             | 0           | 3.081567                | -2.938700 | 0.152169  |
| 39            | 6             | 0           | 0.908213                | -2.655280 | 1.192047  |
| 40            | 6             | 0           | 5.176349                | -1.951243 | -1.437341 |
| 41            | 1             | 0           | 4.138800                | -0.087859 | -1.437852 |
| 42            | 6             | 0           | 4.168551                | -3.773910 | -0.221221 |
| 43            | 6             | 0           | 1.986379                | -3.450630 | 0.897147  |
| 44            | 6             | 0           | 5.199420                | -3.294460 | -0.995278 |
| 45            | 1             | 0           | 5.976408                | -1.579556 | -2.071964 |
| 46            | 1             | 0           | 4.160733                | -4.810419 | 0.108059  |
| 47            | 1             | 0           | 2.000687                | -4.492922 | 1.205479  |
| 48            | 1             | 0           | 6.021396                | -3.945646 | -1.279721 |
| 49            | 8             | 0           | -0.221795               | 0.407755  | -1.232515 |
| 50            | 15            | 0           | -1.242897               | -0.127581 | -0.072809 |
| 51            | 8             | 0           | -0.202389               | -0.538341 | 1.126101  |
| 52            | 8             | 0           | -2.071863               | 1.022594  | 0.486952  |
| 53            | 8             | 0           | -1.979652               | -1.311875 | -0.642110 |
| 54            | 1             | 0           | 0.042786                | -3.033529 | 1.725372  |
| 55            | 1             | 0           | -0.152742               | 2.910803  | -1.817102 |
| 56            | 1             | 0           | -7.711089               | 0.897843  | 0.168386  |

**TS-2nd-CO-O-syn**

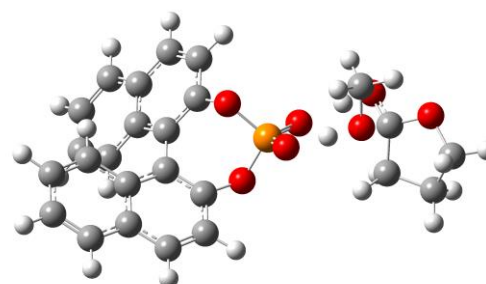

B3LYP/6-31G(d); E(B3LYP) = -1834.533221 hartree  
 Zero-point Energy Correction = 0.437501 hartree  
 Thermal Correction to Energy = 0.464799 hartree  
 Thermal correction to Enthalpy = 0.465743 hartree  
 Thermal correction to Gibbs Free Energy = 0.377925 hartree  
 Sum of electronic and Zero-point Energies = -1834.095720 hartree  
 Sum of electronic and thermal Energies = -1834.068422 hartree  
 Sum of electronic and thermal Enthalpies = -1834.067478 hartree  
 Sum of electronic and thermal Free Energies = -1834.155296 hartree  
 The number of Imaginary frequencies = 1

| Center Number | Atomic Number | Atomic Type | Coordinates (Angstroms) |           |           |
|---------------|---------------|-------------|-------------------------|-----------|-----------|
|               |               |             | X                       | Y         | Z         |
| 1             | 6             | 0           | 4.930900                | 3.574339  | 0.878472  |
| 2             | 6             | 0           | 5.025793                | 2.235137  | 1.323152  |
| 3             | 6             | 0           | 4.058429                | 1.313030  | 0.989767  |
| 4             | 6             | 0           | 2.937137                | 1.674987  | 0.191873  |
| 5             | 6             | 0           | 2.823014                | 3.045532  | -0.219426 |
| 6             | 6             | 0           | 3.847300                | 3.966756  | 0.127781  |
| 7             | 6             | 0           | 1.906330                | 0.737778  | -0.173034 |
| 8             | 6             | 0           | 0.779032                | 1.235141  | -0.810534 |
| 9             | 6             | 0           | 0.657914                | 2.583113  | -1.210018 |
| 10            | 6             | 0           | 1.673634                | 3.464669  | -0.940154 |
| 11            | 6             | 0           | 1.982778                | -0.713885 | 0.155538  |
| 12            | 6             | 0           | 3.070171                | -1.555882 | -0.271172 |
| 13            | 6             | 0           | 3.101835                | -2.930143 | 0.142336  |
| 14            | 6             | 0           | 2.038968                | -3.447723 | 0.929046  |
| 15            | 6             | 0           | 0.966378                | -2.659490 | 1.261077  |
| 16            | 6             | 0           | 0.944332                | -1.307696 | 0.857522  |
| 17            | 6             | 0           | 4.105678                | -1.097967 | -1.132967 |
| 18            | 6             | 0           | 5.128346                | -1.932324 | -1.527115 |
| 19            | 6             | 0           | 5.177945                | -3.273950 | -1.082410 |
| 20            | 6             | 0           | 4.180319                | -3.758553 | -0.268989 |
| 21            | 8             | 0           | -0.274949               | 0.386199  | -1.129588 |
| 22            | 8             | 0           | -0.162262               | -0.551631 | 1.229634  |
| 23            | 15            | 0           | -1.249647               | -0.151853 | 0.070125  |
| 24            | 8             | 0           | -1.991497               | -1.346604 | -0.473346 |
| 25            | 8             | 0           | -2.065883               | 0.991721  | 0.657461  |
| 26            | 1             | 0           | 5.704266                | 4.290353  | 1.142732  |
| 27            | 1             | 0           | 5.867258                | 1.931009  | 1.939938  |
| 28            | 1             | 0           | 4.142018                | 0.294420  | 1.349970  |
| 29            | 1             | 0           | 3.748630                | 4.998125  | -0.203037 |
| 30            | 1             | 0           | 1.596737                | 4.503544  | -1.250924 |
| 31            | 1             | 0           | 2.072704                | -4.488785 | 1.240016  |
| 32            | 1             | 0           | 4.077838                | -0.076583 | -1.494045 |
| 33            | 1             | 0           | 5.901431                | -1.556755 | -2.192171 |
| 34            | 1             | 0           | 5.993596                | -3.919931 | -1.395504 |
| 35            | 1             | 0           | 4.192506                | -4.794061 | 0.063300  |
| 36            | 1             | 0           | -3.407783               | 0.852311  | 0.847921  |
| 37            | 1             | 0           | 0.124156                | -3.042216 | 1.827323  |
| 38            | 1             | 0           | -0.245941               | 2.887432  | -1.726667 |
| 39            | 6             | 0           | -5.018178               | -0.515757 | -0.070726 |
| 40            | 8             | 0           | -6.348696               | -0.551332 | 0.167647  |
| 41            | 8             | 0           | -4.479673               | 0.725554  | 1.014311  |

|    |   |   |           |           |           |
|----|---|---|-----------|-----------|-----------|
| 42 | 1 | 0 | -3.437367 | -1.600073 | -0.013384 |
| 43 | 6 | 0 | -6.155733 | 0.551021  | -1.904014 |
| 44 | 6 | 0 | -4.741849 | 0.156480  | -1.425710 |
| 45 | 1 | 0 | -6.535017 | -0.179241 | -2.625384 |
| 46 | 1 | 0 | -6.189610 | 1.538679  | -2.371043 |
| 47 | 1 | 0 | -4.243967 | -0.557990 | -2.084223 |
| 48 | 1 | 0 | -4.082110 | 1.016954  | -1.307275 |
| 49 | 8 | 0 | -4.415490 | -1.620989 | 0.300836  |
| 50 | 6 | 0 | -4.684382 | 0.388622  | 2.399238  |
| 51 | 1 | 0 | -4.179427 | 1.148935  | 2.999051  |
| 52 | 1 | 0 | -5.756909 | 0.399985  | 2.597553  |
| 53 | 1 | 0 | -4.274835 | -0.601320 | 2.619191  |
| 54 | 6 | 0 | -6.979400 | 0.490957  | -0.611976 |
| 55 | 1 | 0 | -8.020689 | 0.193984  | -0.746505 |
| 56 | 1 | 0 | -6.935337 | 1.430511  | -0.049696 |

### TS-2nd-CO-C-anti

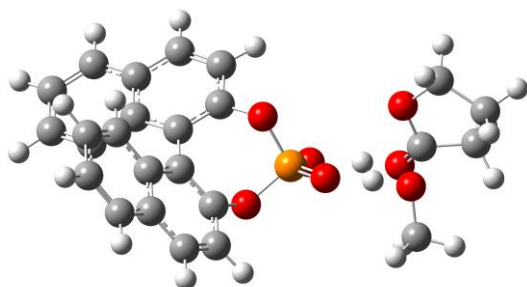

B3LYP/6-31G(d); E(B3LYP) = -1834.531644 hartree

Zero-point Energy Correction = 0.436530 hartree

Thermal Correction to Energy = 0.463764 hartree

Thermal correction to Enthalpy = 0.464708 hartree

Thermal correction to Gibbs Free Energy = 0.377466 hartree

Sum of electronic and Zero-point Energies = -1834.095115 hartree

Sum of electronic and thermal Energies = -1834.067880 hartree

Sum of electronic and thermal Enthalpies = -1834.066936 hartree

Sum of electronic and thermal Free Energies = -1834.154179 hartree

The number of Imaginary frequencies = 1

| Center Number | Atomic Number | Atomic Type | Coordinates (Angstroms) |           |           |
|---------------|---------------|-------------|-------------------------|-----------|-----------|
|               |               |             | X                       | Y         | Z         |
| 1             | 6             | 0           | 4.976709                | 0.522597  | -0.134649 |
| 2             | 8             | 0           | 4.360959                | 0.843116  | 1.025314  |
| 3             | 8             | 0           | 4.530045                | -1.187800 | -0.234388 |
| 4             | 6             | 0           | 5.222500                | 0.545382  | 2.156118  |
| 5             | 6             | 0           | 6.532284                | -0.018964 | 1.567854  |
| 6             | 6             | 0           | 6.470203                | 0.434944  | 0.102514  |
| 7             | 1             | 0           | 5.366596                | 1.487970  | 2.692716  |
| 8             | 1             | 0           | 6.534925                | -1.109901 | 1.624343  |
| 9             | 1             | 0           | 7.413104                | 0.357278  | 2.094227  |
| 10            | 1             | 0           | 6.972772                | -0.229768 | -0.601470 |
| 11            | 1             | 0           | 6.872883                | 1.445203  | -0.035909 |
| 12            | 8             | 0           | 4.528916                | 1.082569  | -1.222141 |
| 13            | 1             | 0           | 3.484610                | 1.154427  | -1.205349 |
| 14            | 6             | 0           | 4.759217                | -1.815139 | -1.505010 |
| 15            | 1             | 0           | 4.101564                | -2.685199 | -1.573217 |
| 16            | 1             | 0           | 5.801782                | -2.140446 | -1.557836 |
| 17            | 1             | 0           | 4.540200                | -1.120912 | -2.322284 |
| 18            | 1             | 0           | 3.441574                | -1.192135 | -0.064376 |
| 19            | 6             | 0           | -4.840566               | -1.968238 | 1.843625  |
| 20            | 6             | 0           | -3.889799               | -1.122694 | 1.317463  |
| 21            | 6             | 0           | -2.932427               | -1.585240 | 0.370797  |
| 22            | 6             | 0           | -2.963845               | -2.974844 | 0.012306  |
| 23            | 6             | 0           | -3.968600               | -3.815673 | 0.561813  |
| 24            | 6             | 0           | -4.893442               | -3.327070 | 1.454989  |

|    |    |   |           |           |           |
|----|----|---|-----------|-----------|-----------|
| 25 | 1  | 0 | -5.554134 | -1.587773 | 2.569671  |
| 26 | 1  | 0 | -3.856923 | -0.087422 | 1.636012  |
| 27 | 6  | 0 | -1.921925 | -0.730113 | -0.195805 |
| 28 | 6  | 0 | -1.972402 | -3.492624 | -0.862384 |
| 29 | 1  | 0 | -3.982720 | -4.863173 | 0.269380  |
| 30 | 1  | 0 | -5.653156 | -3.982114 | 1.872661  |
| 31 | 6  | 0 | -0.966097 | -2.687668 | -1.332651 |
| 32 | 6  | 0 | -0.942956 | -1.320754 | -0.981962 |
| 33 | 1  | 0 | -2.006025 | -4.545183 | -1.132234 |
| 34 | 6  | 0 | -1.856907 | 0.734038  | 0.074177  |
| 35 | 6  | 0 | -2.946318 | 1.631243  | -0.211417 |
| 36 | 6  | 0 | -0.683209 | 1.280796  | 0.572056  |
| 37 | 6  | 0 | -4.136063 | 1.212423  | -0.870191 |
| 38 | 6  | 0 | -2.825733 | 3.019125  | 0.134771  |
| 39 | 6  | 0 | -0.556259 | 2.645806  | 0.906687  |
| 40 | 6  | 0 | -5.157806 | 2.098296  | -1.131943 |
| 41 | 1  | 0 | -4.230437 | 0.178365  | -1.180215 |
| 42 | 6  | 0 | -3.905269 | 3.902387  | -0.135317 |
| 43 | 6  | 0 | -1.618093 | 3.492478  | 0.712807  |
| 44 | 6  | 0 | -5.051594 | 3.456066  | -0.750648 |
| 45 | 1  | 0 | -6.051825 | 1.750786  | -1.642828 |
| 46 | 1  | 0 | -3.799529 | 4.948212  | 0.143980  |
| 47 | 1  | 0 | -1.536365 | 4.544793  | 0.973067  |
| 48 | 1  | 0 | -5.867246 | 4.143532  | -0.957473 |
| 49 | 8  | 0 | 0.093971  | -0.554072 | -1.498746 |
| 50 | 15 | 0 | 1.283693  | -0.052446 | -0.489499 |
| 51 | 8  | 0 | 0.418321  | 0.465373  | 0.802531  |
| 52 | 8  | 0 | 2.096117  | -1.237070 | 0.013264  |
| 53 | 8  | 0 | 2.002687  | 1.069913  | -1.193205 |
| 54 | 1  | 0 | 0.389600  | 2.990617  | 1.310286  |
| 55 | 1  | 0 | -0.176856 | -3.067122 | -1.972660 |
| 56 | 1  | 0 | 4.697542  | -0.158954 | 2.804944  |

### TS-2nd-CO-C-syn\*

\*Originally, an initial structure corresponding to CO-C-syn TS was generated, however the optimized structure was similar to that of CO-C-anti TS and hence the TS energy was almost the same as that of CO-C-anti.

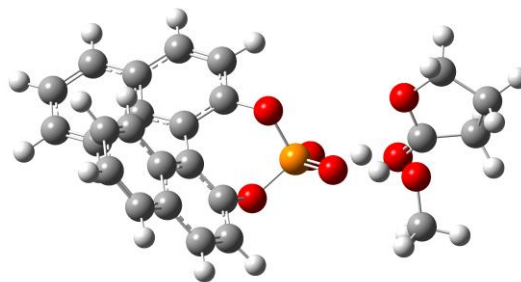

B3LYP/6-31G(d); E(B3LYP) = -1834.531644 hartree

Zero-point Energy Correction = 0.436531 hartree

Thermal Correction to Energy = 0.463765 hartree

Thermal correction to Enthalpy = 0.464710 hartree

Thermal correction to Gibbs Free Energy = 0.377466 hartree

Sum of electronic and Zero-point Energies = -1834.095113 hartree

Sum of electronic and thermal Energies = -1834.067879 hartree

Sum of electronic and thermal Enthalpies = -1834.066935 hartree

Sum of electronic and thermal Free Energies = -1834.154178 hartree

The number of Imaginary frequencies = 1

| Center Number | Atomic Number | Atomic Type | Coordinates (Angstroms) |          |           |
|---------------|---------------|-------------|-------------------------|----------|-----------|
|               |               |             | X                       | Y        | Z         |
| 1             | 6             | 0           | -5.051611               | 3.456078 | -0.750634 |
| 2             | 6             | 0           | -5.157833               | 2.098307 | -1.131922 |
| 3             | 6             | 0           | -4.136091               | 1.212431 | -0.870179 |
| 4             | 6             | 0           | -2.946336               | 1.631248 | -0.211423 |
| 5             | 6             | 0           | -2.825740               | 3.019131 | 0.134758  |

|    |    |   |           |           |           |
|----|----|---|-----------|-----------|-----------|
| 6  | 6  | 0 | -3.905276 | 3.902397  | -0.135319 |
| 7  | 6  | 0 | -1.856925 | 0.734040  | 0.074161  |
| 8  | 6  | 0 | -0.683218 | 1.280795  | 0.572021  |
| 9  | 6  | 0 | -0.556257 | 2.645806  | 0.906645  |
| 10 | 6  | 0 | -1.618091 | 3.492482  | 0.712776  |
| 11 | 6  | 0 | -1.921953 | -0.730112 | -0.195810 |
| 12 | 6  | 0 | -2.932449 | -1.585232 | 0.370813  |
| 13 | 6  | 0 | -2.963876 | -2.974838 | 0.012335  |
| 14 | 6  | 0 | -1.972447 | -3.492628 | -0.862365 |
| 15 | 6  | 0 | -0.966148 | -2.687679 | -1.332654 |
| 16 | 6  | 0 | -0.942998 | -1.320762 | -0.981978 |
| 17 | 6  | 0 | -3.888986 | -1.122674 | 1.317488  |
| 18 | 6  | 0 | -4.840569 | -1.968210 | 1.843671  |
| 19 | 6  | 0 | -4.893454 | -3.327046 | 1.455048  |
| 20 | 6  | 0 | -3.968626 | -3.815659 | 0.561863  |
| 21 | 8  | 0 | 0.418310  | 0.465366  | 0.802481  |
| 22 | 8  | 0 | 0.093924  | -0.554089 | -1.498785 |
| 23 | 15 | 0 | 1.283664  | -0.052441 | -0.489568 |
| 24 | 8  | 0 | 2.096053  | -1.237109 | 0.013183  |
| 25 | 8  | 0 | 2.002691  | 1.069886  | -1.193254 |
| 26 | 1  | 0 | -5.867263 | 4.143546  | -0.957451 |
| 27 | 1  | 0 | -6.051861 | 1.750799  | -1.642795 |
| 28 | 1  | 0 | -4.230473 | 0.178371  | -1.180199 |
| 29 | 1  | 0 | -3.799529 | 4.948222  | 0.143971  |
| 30 | 1  | 0 | -1.536354 | 4.544798  | 0.973030  |
| 31 | 1  | 0 | -2.006077 | -4.545190 | -1.132204 |
| 32 | 1  | 0 | -3.856923 | -0.087400 | 1.636028  |
| 33 | 1  | 0 | -5.554127 | -1.587737 | 2.569723  |
| 34 | 1  | 0 | -5.653164 | -3.982084 | 1.872736  |
| 35 | 1  | 0 | -3.982753 | -4.863162 | 0.269440  |
| 36 | 1  | 0 | 3.441490  | -1.192013 | -0.064243 |
| 37 | 1  | 0 | -0.176917 | -3.067140 | -1.972671 |
| 38 | 1  | 0 | 0.389609  | 2.990615  | 1.310228  |
| 39 | 6  | 0 | 4.976749  | 0.522361  | -0.134729 |
| 40 | 8  | 0 | 4.361021  | 0.843232  | 1.025187  |
| 41 | 8  | 0 | 4.529996  | -1.187682 | -0.234174 |
| 42 | 1  | 0 | 3.484841  | 1.154269  | -1.205586 |
| 43 | 6  | 0 | 6.532307  | -0.018815 | 1.567913  |
| 44 | 6  | 0 | 6.470255  | 0.434790  | 0.102478  |
| 45 | 1  | 0 | 7.413179  | 0.357434  | 2.094193  |
| 46 | 1  | 0 | 6.534818  | -1.109742 | 1.624645  |
| 47 | 1  | 0 | 6.872910  | 1.445031  | -0.036135 |
| 48 | 1  | 0 | 6.972865  | -0.230049 | -0.601359 |
| 49 | 8  | 0 | 4.529064  | 1.082301  | -1.222340 |
| 50 | 6  | 0 | 4.759309  | -1.815366 | -1.504622 |
| 51 | 1  | 0 | 4.101491  | -2.685305 | -1.572720 |
| 52 | 1  | 0 | 4.540561  | -1.121280 | -2.322082 |
| 53 | 1  | 0 | 5.801821  | -2.140881 | -1.557163 |
| 54 | 6  | 0 | 5.222596  | 0.545820  | 2.156043  |
| 55 | 1  | 0 | 5.366801  | 1.488571  | 2.692327  |
| 56 | 1  | 0 | 4.697631  | -0.158264 | 2.805139  |

## 9. DFT Calculation of BINOL- and SPINOL-derived CPA-Catalyzed Reactions

### Optimized structure of BINOL-derived CPA (*R*)-1aa (TRIP)

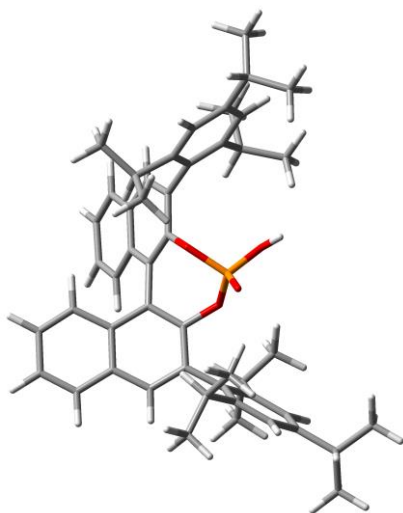

B3LYP/6-31G(d); E(B3LYP) = -2582.067793 hartree

Zero-point Energy Correction = 0.954313 hartree

Thermal Correction to Energy = 1.009099 hartree

Thermal correction to Enthalpy = 1.010043 hartree

Thermal correction to Gibbs Free Energy = 0.863516 hartree

Sum of electronic and Zero-point Energies = -2581.113480 hartree

Sum of electronic and thermal Energies = -2581.058694 hartree

Sum of electronic and thermal Enthalpies = -2581.057750 hartree

Sum of electronic and thermal Free Energies = -2581.204277 hartree

The number of Imaginary frequencies = 0

| Center Number | Atomic Number | Atomic Type | Coordinates (Angstroms) |           |           |
|---------------|---------------|-------------|-------------------------|-----------|-----------|
|               |               |             | X                       | Y         | Z         |
| 1             | 1             | 0           | 0.929521                | -2.862296 | -0.710095 |
| 2             | 6             | 0           | -0.992836               | 5.227801  | 2.093168  |
| 3             | 6             | 0           | -0.450578               | 4.175811  | 1.388406  |
| 4             | 6             | 0           | -1.252494               | 3.074000  | 0.981220  |
| 5             | 6             | 0           | -2.634190               | 3.070523  | 1.359274  |
| 6             | 6             | 0           | -3.166811               | 4.181072  | 2.068456  |
| 7             | 6             | 0           | -2.367486               | 5.241394  | 2.426403  |
| 8             | 1             | 0           | -0.356209               | 6.052796  | 2.400935  |
| 9             | 1             | 0           | 0.606644                | 4.177737  | 1.150712  |
| 10            | 6             | 0           | -0.731116               | 1.951483  | 0.245865  |
| 11            | 6             | 0           | -3.444094               | 1.951223  | 1.040049  |
| 12            | 1             | 0           | -4.220336               | 4.166811  | 2.336921  |
| 13            | 1             | 0           | -2.783811               | 6.081117  | 2.975858  |
| 14            | 6             | 0           | -2.933976               | 0.821497  | 0.434520  |
| 15            | 6             | 0           | -1.558175               | 0.852417  | 0.072231  |
| 16            | 1             | 0           | -4.496645               | 1.975781  | 1.308852  |
| 17            | 6             | 0           | 0.656656                | 1.947420  | -0.303968 |
| 18            | 6             | 0           | 1.123801                | 2.988495  | -1.182069 |
| 19            | 6             | 0           | 1.530534                | 0.915158  | 0.000427  |
| 20            | 6             | 0           | 0.273398                | 3.995784  | -1.716092 |
| 21            | 6             | 0           | 2.502715                | 2.997961  | -1.569590 |
| 22            | 6             | 0           | 2.900791                | 0.888593  | -0.388077 |
| 23            | 6             | 0           | 0.767217                | 4.975750  | -2.548796 |
| 24            | 1             | 0           | -0.782092               | 3.982100  | -1.471702 |
| 25            | 6             | 0           | 2.984777                | 4.035200  | -2.413268 |
| 26            | 6             | 0           | 3.359381                | 1.957012  | -1.130656 |
| 27            | 6             | 0           | 2.139108                | 5.008441  | -2.891718 |
| 28            | 1             | 0           | 0.094038                | 5.728288  | -2.950205 |

|    |    |   |           |           |           |
|----|----|---|-----------|-----------|-----------|
| 29 | 1  | 0 | 4.037207  | 4.033298  | -2.686600 |
| 30 | 1  | 0 | 4.406526  | 1.989843  | -1.418722 |
| 31 | 1  | 0 | 2.516877  | 5.791978  | -3.542647 |
| 32 | 8  | 0 | -1.042124 | -0.284803 | -0.563573 |
| 33 | 15 | 0 | -0.003998 | -1.204411 | 0.268171  |
| 34 | 8  | 0 | 1.084677  | -0.132832 | 0.808203  |
| 35 | 8  | 0 | -0.485189 | -2.067920 | 1.360203  |
| 36 | 6  | 0 | 3.808039  | -0.245688 | -0.010045 |
| 37 | 6  | 0 | 4.204391  | -0.419830 | 1.337099  |
| 38 | 6  | 0 | 4.298757  | -1.127623 | -1.007954 |
| 39 | 6  | 0 | 5.068466  | -1.473031 | 1.657256  |
| 40 | 6  | 0 | 5.163089  | -2.160286 | -0.627965 |
| 41 | 6  | 0 | 5.559520  | -2.357607 | 0.697161  |
| 42 | 6  | 0 | -3.802988 | -0.370170 | 0.155645  |
| 43 | 6  | 0 | -4.234660 | -1.199406 | 1.217437  |
| 44 | 6  | 0 | -4.226858 | -0.638621 | -1.168778 |
| 45 | 6  | 0 | -5.088850 | -2.270410 | 0.925380  |
| 46 | 6  | 0 | -5.074415 | -1.725131 | -1.400876 |
| 47 | 6  | 0 | -5.520690 | -2.555904 | -0.369313 |
| 48 | 8  | 0 | 0.651744  | -1.972769 | -0.985986 |
| 49 | 1  | 0 | -5.426295 | -2.909095 | 1.738212  |
| 50 | 1  | 0 | -5.400013 | -1.923833 | -2.419089 |
| 51 | 1  | 0 | 5.541087  | -2.830704 | -1.395581 |
| 52 | 1  | 0 | 5.376397  | -1.604418 | 2.692137  |
| 53 | 6  | 0 | -3.821299 | 0.236900  | -2.354595 |
| 54 | 6  | 0 | -5.041135 | 0.956257  | -2.963796 |
| 55 | 6  | 0 | -3.053653 | -0.560164 | -3.426348 |
| 56 | 1  | 0 | -3.145842 | 1.016500  | -1.990278 |
| 57 | 1  | 0 | -5.561072 | 1.560811  | -2.212119 |
| 58 | 1  | 0 | -4.728092 | 1.620597  | -3.778485 |
| 59 | 1  | 0 | -5.764563 | 0.242531  | -3.375192 |
| 60 | 1  | 0 | -2.166456 | -1.036863 | -2.998595 |
| 61 | 1  | 0 | -3.679075 | -1.342430 | -3.872733 |
| 62 | 1  | 0 | -2.728628 | 0.104905  | -4.235755 |
| 63 | 6  | 0 | -3.824218 | -0.968361 | 2.672641  |
| 64 | 6  | 0 | -3.230962 | -2.229210 | 3.329608  |
| 65 | 6  | 0 | -5.007275 | -0.427854 | 3.501540  |
| 66 | 1  | 0 | -3.038599 | -0.207162 | 2.686271  |
| 67 | 1  | 0 | -2.369392 | -2.592758 | 2.764377  |
| 68 | 1  | 0 | -2.897948 | -1.994116 | 4.347998  |
| 69 | 1  | 0 | -3.969228 | -3.036370 | 3.406867  |
| 70 | 1  | 0 | -5.406786 | 0.502113  | 3.081130  |
| 71 | 1  | 0 | -5.828938 | -1.153496 | 3.536985  |
| 72 | 1  | 0 | -4.693681 | -0.226516 | 4.533042  |
| 73 | 6  | 0 | 3.951885  | -0.984204 | -2.492503 |
| 74 | 6  | 0 | 3.419330  | -2.287603 | -3.117054 |
| 75 | 6  | 0 | 5.164844  | -0.468562 | -3.294362 |
| 76 | 1  | 0 | 3.154974  | -0.241831 | -2.587192 |
| 77 | 1  | 0 | 2.526820  | -2.639393 | -2.592496 |
| 78 | 1  | 0 | 3.143921  | -2.115416 | -4.164250 |
| 79 | 1  | 0 | 4.166425  | -3.089445 | -3.103069 |
| 80 | 1  | 0 | 5.535199  | 0.484141  | -2.900392 |
| 81 | 1  | 0 | 5.995241  | -1.183911 | -3.258201 |
| 82 | 1  | 0 | 4.896010  | -0.319013 | -4.347062 |
| 83 | 6  | 0 | 6.499178  | -3.490528 | 1.089123  |
| 84 | 6  | 0 | 7.880166  | -3.349068 | 0.421385  |
| 85 | 6  | 0 | 5.884203  | -4.872727 | 0.798957  |
| 86 | 1  | 0 | 6.651130  | -3.420845 | 2.174940  |
| 87 | 1  | 0 | 8.336482  | -2.381324 | 0.656575  |
| 88 | 1  | 0 | 8.558453  | -4.139429 | 0.764678  |
| 89 | 1  | 0 | 7.805231  | -3.426317 | -0.669872 |
| 90 | 1  | 0 | 4.920162  | -4.991381 | 1.305611  |
| 91 | 1  | 0 | 5.717924  | -5.016983 | -0.275323 |
| 92 | 1  | 0 | 6.550976  | -5.672719 | 1.142401  |
| 93 | 6  | 0 | 3.771721  | 0.529673  | 2.454074  |
| 94 | 6  | 0 | 4.971200  | 1.344842  | 2.978859  |
| 95 | 6  | 0 | 3.054157  | -0.203407 | 3.602946  |
| 96 | 1  | 0 | 3.060554  | 1.248460  | 2.037930  |
| 97 | 1  | 0 | 5.453644  | 1.906893  | 2.171196  |

|     |   |   |           |           |           |
|-----|---|---|-----------|-----------|-----------|
| 98  | 1 | 0 | 4.643482  | 2.059951  | 3.743074  |
| 99  | 1 | 0 | 5.729412  | 0.695571  | 3.432399  |
| 100 | 1 | 0 | 2.185349  | -0.757116 | 3.235292  |
| 101 | 1 | 0 | 3.720434  | -0.910163 | 4.111737  |
| 102 | 1 | 0 | 2.706941  | 0.517914  | 4.352456  |
| 103 | 6 | 0 | -6.445038 | -3.736012 | -0.639248 |
| 104 | 6 | 0 | -5.776235 | -4.792753 | -1.538737 |
| 105 | 6 | 0 | -7.796732 | -3.286952 | -1.225749 |
| 106 | 1 | 0 | -6.649708 | -4.212146 | 0.329500  |
| 107 | 1 | 0 | -4.833255 | -5.141767 | -1.104195 |
| 108 | 1 | 0 | -6.434024 | -5.660209 | -1.672045 |
| 109 | 1 | 0 | -5.555184 | -4.386484 | -2.532986 |
| 110 | 1 | 0 | -8.292045 | -2.562652 | -0.569803 |
| 111 | 1 | 0 | -7.668448 | -2.814960 | -2.207166 |
| 112 | 1 | 0 | -8.466925 | -4.145413 | -1.355018 |

### DFT calculation of real system using BINOL-derive CPA (R)-1aa

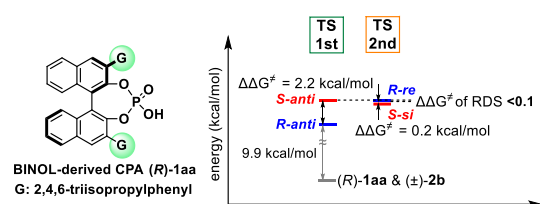

BINOL-derived CPA (R)-1aa  
G: 2,4,6-triisopropylphenyl

### TS-1st-(R)-reaction pathway: R-anti/(R)-1aa (BINOL-TRIP)

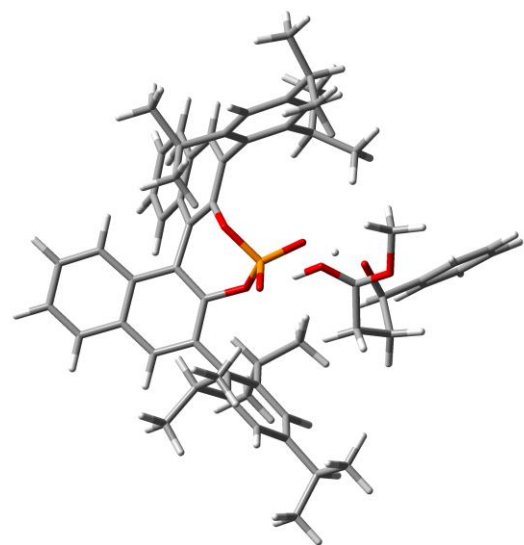

B3LYP/6-31G(d); E(B3LYP) = -3235.352388 hartree  
 Zero-point Energy Correction = 1.188487 hartree  
 Thermal Correction to Energy = 1.256238 hartree  
 Thermal correction to Enthalpy = 1.257182 hartree  
 Thermal correction to Gibbs Free Energy = 1.080533 hartree  
 Sum of electronic and Zero-point Energies = -3234.163901 hartree  
 Sum of electronic and thermal Energies = -3234.096150 hartree  
 Sum of electronic and thermal Enthalpies = -3234.095206 hartree  
 Sum of electronic and thermal Free Energies = -3234.271855 hartree  
 The number of Imaginary frequencies = 1

| Center Number | Atomic Number | Atomic Type | Coordinates (Angstroms) |          |           |
|---------------|---------------|-------------|-------------------------|----------|-----------|
|               |               |             | X                       | Y        | Z         |
| 1             | 6             | 0           | -0.172926               | 3.757161 | -1.671234 |
| 2             | 8             | 0           | 0.179376                | 3.450957 | -0.033322 |
| 3             | 1             | 0           | 0.016874                | 1.901580 | -2.222585 |
| 4             | 6             | 0           | -0.985145               | 3.791751 | 0.781285  |
| 5             | 6             | 0           | -1.978608               | 4.446975 | -0.201154 |

|    |    |   |           |           |           |
|----|----|---|-----------|-----------|-----------|
| 6  | 6  | 0 | -1.688173 | 3.786555  | -1.548725 |
| 7  | 1  | 0 | -1.398827 | 2.844129  | 1.143150  |
| 8  | 1  | 0 | -1.800561 | 5.524572  | -0.259471 |
| 9  | 1  | 0 | -3.008470 | 4.292126  | 0.132142  |
| 10 | 1  | 0 | -2.106242 | 4.337639  | -2.395718 |
| 11 | 1  | 0 | -2.058207 | 2.757328  | -1.580107 |
| 12 | 8  | 0 | 0.439446  | 2.813780  | -2.370553 |
| 13 | 8  | 0 | 0.326395  | 4.993787  | -1.877497 |
| 14 | 6  | 0 | 1.748292  | 5.085845  | -2.083187 |
| 15 | 1  | 0 | 1.960485  | 6.154153  | -2.139757 |
| 16 | 1  | 0 | 2.036564  | 4.590877  | -3.012774 |
| 17 | 1  | 0 | 2.282289  | 4.637615  | -1.240704 |
| 18 | 1  | 0 | 0.434890  | 2.362372  | 0.160912  |
| 19 | 6  | 0 | 1.043707  | -5.194724 | 3.774847  |
| 20 | 6  | 0 | 0.514234  | -4.494273 | 2.713325  |
| 21 | 6  | 0 | 1.319053  | -3.613610 | 1.938904  |
| 22 | 6  | 0 | 2.690135  | -3.447159 | 2.318226  |
| 23 | 6  | 0 | 3.210543  | -4.199940 | 3.405425  |
| 24 | 6  | 0 | 2.408923  | -5.059828 | 4.119528  |
| 25 | 1  | 0 | 0.404282  | -5.853794 | 4.355942  |
| 26 | 1  | 0 | -0.535980 | -4.602571 | 2.468878  |
| 27 | 6  | 0 | 0.810920  | -2.860333 | 0.822668  |
| 28 | 6  | 0 | 3.500475  | -2.518922 | 1.616056  |
| 29 | 1  | 0 | 4.256671  | -4.068852 | 3.671871  |
| 30 | 1  | 0 | 2.816090  | -5.624076 | 4.954054  |
| 31 | 6  | 0 | 2.997962  | -1.707510 | 0.620344  |
| 32 | 6  | 0 | 1.630400  | -1.890752 | 0.263042  |
| 33 | 1  | 0 | 4.547278  | -2.429110 | 1.893077  |
| 34 | 6  | 0 | -0.560473 | -3.091794 | 0.279290  |
| 35 | 6  | 0 | -0.987315 | -4.395095 | -0.158360 |
| 36 | 6  | 0 | -1.454401 | -2.037467 | 0.157694  |
| 37 | 6  | 0 | -0.107900 | -5.508966 | -0.257737 |
| 38 | 6  | 0 | -2.352524 | -4.581395 | -0.549958 |
| 39 | 6  | 0 | -2.814873 | -2.197096 | -0.235040 |
| 40 | 6  | 0 | -0.561172 | -6.738900 | -0.681173 |
| 41 | 1  | 0 | 0.938478  | -5.380843 | -0.007341 |
| 42 | 6  | 0 | -2.792939 | -5.867898 | -0.963194 |
| 43 | 6  | 0 | -3.236978 | -3.473418 | -0.543861 |
| 44 | 6  | 0 | -1.920039 | -6.928836 | -1.025015 |
| 45 | 1  | 0 | 0.134425  | -7.570334 | -0.756728 |
| 46 | 1  | 0 | -3.835595 | -5.991836 | -1.246140 |
| 47 | 1  | 0 | -4.275147 | -3.634877 | -0.822097 |
| 48 | 1  | 0 | -2.265980 | -7.906122 | -1.350280 |
| 49 | 8  | 0 | 1.127715  | -1.099056 | -0.764771 |
| 50 | 15 | 0 | 0.021618  | 0.051420  | -0.425896 |
| 51 | 8  | 0 | -1.041354 | -0.759022 | 0.515527  |
| 52 | 8  | 0 | 0.602030  | 1.123404  | 0.494731  |
| 53 | 6  | 0 | -3.764191 | -1.035945 | -0.299328 |
| 54 | 6  | 0 | -4.247007 | -0.447810 | 0.892792  |
| 55 | 6  | 0 | -4.220506 | -0.560434 | -1.554318 |
| 56 | 6  | 0 | -5.175469 | 0.596294  | 0.805000  |
| 57 | 6  | 0 | -5.154829 | 0.481168  | -1.581313 |
| 58 | 6  | 0 | -5.650453 | 1.073895  | -0.417066 |
| 59 | 6  | 0 | 3.869815  | -0.698979 | -0.070476 |
| 60 | 6  | 0 | 4.305926  | 0.457983  | 0.618695  |
| 61 | 6  | 0 | 4.294121  | -0.927122 | -1.402662 |
| 62 | 6  | 0 | 5.160777  | 1.349989  | -0.041492 |
| 63 | 6  | 0 | 5.139794  | 0.002698  | -2.013953 |
| 64 | 6  | 0 | 5.587929  | 1.149527  | -1.353688 |
| 65 | 8  | 0 | -0.568857 | 0.510780  | -1.733138 |
| 66 | 1  | 0 | 5.503895  | 2.237309  | 0.485704  |
| 67 | 1  | 0 | 5.461841  | -0.179807 | -3.036250 |
| 68 | 1  | 0 | -5.511259 | 0.833055  | -2.546323 |
| 69 | 1  | 0 | -5.556045 | 1.042248  | 1.721818  |
| 70 | 6  | 0 | -0.584995 | 4.650853  | 1.957557  |
| 71 | 6  | 0 | -0.946806 | 4.274805  | 3.254549  |
| 72 | 6  | 0 | 0.131960  | 5.840104  | 1.766784  |
| 73 | 6  | 0 | -0.609564 | 5.077906  | 4.346483  |
| 74 | 1  | 0 | -1.491071 | 3.346442  | 3.412477  |



|     |   |   |           |           |           |
|-----|---|---|-----------|-----------|-----------|
| 75  | 6 | 0 | 0.476209  | 6.637771  | 2.855858  |
| 76  | 1 | 0 | 0.425038  | 6.130535  | 0.761579  |
| 77  | 6 | 0 | 0.103255  | 6.260078  | 4.149184  |
| 78  | 1 | 0 | -0.897231 | 4.773818  | 5.349280  |
| 79  | 1 | 0 | 1.036814  | 7.555340  | 2.697553  |
| 80  | 1 | 0 | 0.371770  | 6.883680  | 4.997697  |
| 81  | 6 | 0 | 3.892706  | -2.173674 | -2.191281 |
| 82  | 6 | 0 | 5.116211  | -3.060631 | -2.496819 |
| 83  | 6 | 0 | 3.125112  | -1.821792 | -3.479698 |
| 84  | 1 | 0 | 3.219222  | -2.770329 | -1.569933 |
| 85  | 1 | 0 | 5.636874  | -3.349340 | -1.576740 |
| 86  | 1 | 0 | 4.805873  | -3.976599 | -3.014363 |
| 87  | 1 | 0 | 5.838210  | -2.543448 | -3.139936 |
| 88  | 1 | 0 | 2.237235  | -1.223851 | -3.254408 |
| 89  | 1 | 0 | 3.750645  | -1.256253 | -4.180906 |
| 90  | 1 | 0 | 2.801030  | -2.736603 | -3.990703 |
| 91  | 6 | 0 | 3.899393  | 0.768537  | 2.060262  |
| 92  | 6 | 0 | 3.364920  | 2.202311  | 2.235882  |
| 93  | 6 | 0 | 5.068435  | 0.514164  | 3.034138  |
| 94  | 1 | 0 | 3.084748  | 0.092528  | 2.334045  |
| 95  | 1 | 0 | 2.535725  | 2.399222  | 1.552784  |
| 96  | 1 | 0 | 2.999917  | 2.340854  | 3.260626  |
| 97  | 1 | 0 | 4.143499  | 2.955260  | 2.064691  |
| 98  | 1 | 0 | 5.433702  | -0.516765 | 2.972116  |
| 99  | 1 | 0 | 5.914231  | 1.177412  | 2.815151  |
| 100 | 1 | 0 | 4.755453  | 0.700719  | 4.068804  |
| 101 | 6 | 0 | -3.755728 | -1.155310 | -2.885395 |
| 102 | 6 | 0 | -3.184550 | -0.091666 | -3.841547 |
| 103 | 6 | 0 | -4.891674 | -1.946723 | -3.564892 |
| 104 | 1 | 0 | -2.944103 | -1.857406 | -2.677195 |
| 105 | 1 | 0 | -2.337199 | 0.420699  | -3.379578 |
| 106 | 1 | 0 | -2.833169 | -0.569779 | -4.764087 |
| 107 | 1 | 0 | -3.938590 | 0.652046  | -4.126076 |
| 108 | 1 | 0 | -5.272646 | -2.744945 | -2.917879 |
| 109 | 1 | 0 | -5.736780 | -1.293517 | -3.814458 |
| 110 | 1 | 0 | -4.536873 | -2.405405 | -4.495739 |
| 111 | 6 | 0 | -6.693842 | 2.183119  | -0.467737 |
| 112 | 6 | 0 | -8.024452 | 1.683822  | -1.062857 |
| 113 | 6 | 0 | -6.189368 | 3.426640  | -1.222996 |
| 114 | 1 | 0 | -6.892039 | 2.486876  | 0.569511  |
| 115 | 1 | 0 | -8.409015 | 0.823940  | -0.503832 |
| 116 | 1 | 0 | -8.782708 | 2.475825  | -1.037457 |
| 117 | 1 | 0 | -7.899635 | 1.373989  | -2.107130 |
| 118 | 1 | 0 | -5.266970 | 3.814817  | -0.776132 |
| 119 | 1 | 0 | -5.979774 | 3.197906  | -2.274586 |
| 120 | 1 | 0 | -6.939922 | 4.225860  | -1.199752 |
| 121 | 6 | 0 | -3.830032 | -0.939001 | 2.278823  |
| 122 | 6 | 0 | -5.024638 | -1.544980 | 3.042018  |
| 123 | 6 | 0 | -3.146206 | 0.166618  | 3.105440  |
| 124 | 1 | 0 | -3.097669 | -1.740800 | 2.151538  |
| 125 | 1 | 0 | -5.483632 | -2.361695 | 2.473765  |
| 126 | 1 | 0 | -4.697882 | -1.945241 | 4.009435  |
| 127 | 1 | 0 | -5.801927 | -0.796555 | 3.236644  |
| 128 | 1 | 0 | -2.259431 | 0.543938  | 2.586337  |
| 129 | 1 | 0 | -3.825156 | 1.007159  | 3.294437  |
| 130 | 1 | 0 | -2.827923 | -0.226718 | 4.078474  |
| 131 | 6 | 0 | 6.509891  | 2.153358  | -2.034027 |
| 132 | 6 | 0 | 5.841596  | 2.806164  | -3.258877 |
| 133 | 6 | 0 | 7.864731  | 1.526721  | -2.413954 |
| 134 | 1 | 0 | 6.710293  | 2.951033  | -1.305238 |
| 135 | 1 | 0 | 4.891794  | 3.279038  | -2.985108 |
| 136 | 1 | 0 | 6.494167  | 3.572451  | -3.694944 |
| 137 | 1 | 0 | 5.629766  | 2.065428  | -4.038889 |
| 138 | 1 | 0 | 8.361893  | 1.098383  | -1.536752 |
| 139 | 1 | 0 | 7.739831  | 0.724374  | -3.150825 |
| 140 | 1 | 0 | 8.531698  | 2.279579  | -2.851475 |

**TS-2nd-(R)-reaction pathway: R-re/(R)-1aa (BINOL-TRIP)**

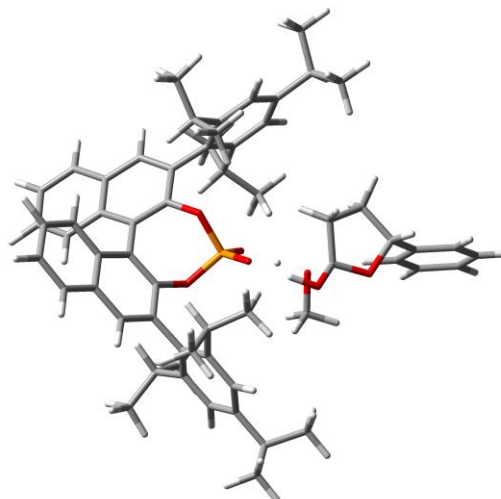

B3LYP/6-31G(d); E(B3LYP) = -3235.348681 hartree

Zero-point Energy Correction = 1.189109 hartree

Thermal Correction to Energy = 1.257015 hartree

Thermal correction to Enthalpy = 1.257959 hartree

Thermal correction to Gibbs Free Energy = 1.080296 hartree

Sum of electronic and Zero-point Energies = -3234.159572 hartree

Sum of electronic and thermal Energies = -3234.091666 hartree

Sum of electronic and thermal Enthalpies = -3234.090722 hartree

Sum of electronic and thermal Free Energies = -3234.268385 hartree

The number of Imaginary frequencies = 1

| Center Number | Atomic Number | Atomic Type | Coordinates (Angstroms) |           |           |
|---------------|---------------|-------------|-------------------------|-----------|-----------|
|               |               |             | X                       | Y         | Z         |
| 1             | 6             | 0           | 2.802911                | 2.351559  | -0.770639 |
| 2             | 8             | 0           | 3.807279                | 3.252682  | -0.697108 |
| 3             | 8             | 0           | 2.502296                | 1.958649  | 0.869821  |
| 4             | 1             | 0           | 0.970759                | 2.175654  | -1.330048 |
| 5             | 6             | 0           | 5.113297                | 2.602602  | -0.866585 |
| 6             | 6             | 0           | 4.808611                | 1.089939  | -0.846563 |
| 7             | 6             | 0           | 3.345204                | 1.026686  | -1.293160 |
| 8             | 1             | 0           | 5.456902                | 2.906555  | -1.861907 |
| 9             | 1             | 0           | 4.918584                | 0.689494  | 0.164219  |
| 10            | 1             | 0           | 5.486748                | 0.539530  | -1.504005 |
| 11            | 1             | 0           | 2.799273                | 0.159491  | -0.920826 |
| 12            | 1             | 0           | 3.246795                | 1.053353  | -2.384290 |
| 13            | 8             | 0           | 1.688220                | 2.889005  | -1.230392 |
| 14            | 6             | 0           | 2.002756                | 3.076573  | 1.633395  |
| 15            | 1             | 0           | 2.785385                | 3.835127  | 1.669831  |
| 16            | 1             | 0           | 1.780831                | 2.708446  | 2.637276  |
| 17            | 1             | 0           | 1.101307                | 3.487876  | 1.171509  |
| 18            | 6             | 0           | 6.092211                | 3.102121  | 0.168065  |
| 19            | 6             | 0           | 5.864794                | 2.902095  | 1.537478  |
| 20            | 6             | 0           | 7.256153                | 3.763409  | -0.235883 |
| 21            | 6             | 0           | 6.785693                | 3.356878  | 2.478982  |
| 22            | 1             | 0           | 4.962821                | 2.391459  | 1.862600  |
| 23            | 6             | 0           | 8.184841                | 4.211793  | 0.705837  |
| 24            | 1             | 0           | 7.437662                | 3.930843  | -1.295230 |
| 25            | 6             | 0           | 7.949958                | 4.010819  | 2.065573  |
| 26            | 1             | 0           | 6.597195                | 3.199001  | 3.537543  |
| 27            | 1             | 0           | 9.085651                | 4.721992  | 0.375865  |
| 28            | 1             | 0           | 8.668192                | 4.362142  | 2.801429  |
| 29            | 1             | 0           | 1.746425                | 1.151993  | 0.893071  |
| 30            | 6             | 0           | -4.202326               | -4.322504 | 3.167586  |
| 31            | 6             | 0           | -3.860637               | -3.360961 | 2.242150  |
| 32            | 6             | 0           | -2.596381               | -3.383850 | 1.590453  |
| 33            | 6             | 0           | -1.672565               | -4.416331 | 1.953838  |

|     |    |   |           |           |           |     |   |   |           |           |           |
|-----|----|---|-----------|-----------|-----------|-----|---|---|-----------|-----------|-----------|
| 34  | 6  | 0 | -2.063757 | -5.405481 | 2.896218  | 103 | 6 | 0 | 2.823181  | -4.006945 | 3.196441  |
| 35  | 6  | 0 | -3.303338 | -5.365676 | 3.490891  | 104 | 1 | 0 | 1.369670  | -2.597140 | 2.483519  |
| 36  | 1  | 0 | -5.171015 | -4.275601 | 3.657820  | 105 | 1 | 0 | 2.931373  | -0.711006 | 2.066680  |
| 37  | 1  | 0 | -4.558417 | -2.563881 | 2.013955  | 106 | 1 | 0 | 3.027007  | -1.310260 | 3.730656  |
| 38  | 6  | 0 | -2.195324 | -2.401067 | 0.618128  | 107 | 1 | 0 | 4.304191  | -1.718082 | 2.581592  |
| 39  | 6  | 0 | -0.375805 | -4.424582 | 1.380178  | 108 | 1 | 0 | 2.227874  | -4.900967 | 2.982242  |
| 40  | 1  | 0 | -1.353052 | -6.188613 | 3.149630  | 109 | 1 | 0 | 3.878352  | -4.271029 | 3.054453  |
| 41  | 1  | 0 | -3.588690 | -6.122451 | 4.216465  | 110 | 1 | 0 | 2.680295  | -3.751076 | 4.253421  |
| 42  | 6  | 0 | 0.061396  | -3.424732 | 0.536683  | 111 | 6 | 0 | -3.277200 | 2.642126  | -2.693740 |
| 43  | 6  | 0 | -0.873806 | -2.404895 | 0.194334  | 112 | 6 | 0 | -1.994413 | 2.887162  | -3.510325 |
| 44  | 1  | 0 | 0.300315  | -5.236453 | 1.634249  | 113 | 6 | 0 | -4.512716 | 3.183260  | -3.441281 |
| 45  | 6  | 0 | -3.156110 | -1.392125 | 0.081233  | 114 | 1 | 0 | -3.393717 | 1.558327  | -2.611767 |
| 46  | 6  | 0 | -4.395621 | -1.784686 | -0.536980 | 115 | 1 | 0 | -1.129571 | 2.448121  | -3.007243 |
| 47  | 6  | 0 | -2.857882 | -0.038414 | 0.143684  | 116 | 1 | 0 | -2.087911 | 2.422610  | -4.499832 |
| 48  | 6  | 0 | -4.728142 | -3.137644 | -0.824871 | 117 | 1 | 0 | -1.804112 | 3.955635  | -3.666961 |
| 49  | 6  | 0 | -5.331168 | -0.768549 | -0.917078 | 118 | 1 | 0 | -5.440969 | 2.964558  | -2.901015 |
| 50  | 6  | 0 | -3.768091 | 0.990021  | -0.237025 | 119 | 1 | 0 | -4.454989 | 4.270934  | -3.569749 |
| 51  | 6  | 0 | -5.928582 | -3.466494 | -1.415248 | 120 | 1 | 0 | -4.586334 | 2.732265  | -4.438334 |
| 52  | 1  | 0 | -4.017250 | -3.919516 | -0.585157 | 121 | 6 | 0 | -3.597038 | 2.281054  | 2.456046  |
| 53  | 6  | 0 | -6.569107 | -1.142651 | -1.506515 | 122 | 6 | 0 | -4.864337 | 2.805336  | 3.160558  |
| 54  | 6  | 0 | -4.996876 | 0.595662  | -0.723669 | 123 | 6 | 0 | -2.384954 | 2.300975  | 3.406256  |
| 55  | 6  | 0 | -6.868119 | -2.463085 | -1.748648 | 124 | 1 | 0 | -3.787304 | 1.234720  | 2.201679  |
| 56  | 1  | 0 | -6.152968 | -4.507493 | -1.631812 | 125 | 1 | 0 | -5.737174 | 2.746208  | 2.500640  |
| 57  | 1  | 0 | -7.271347 | -0.357798 | -1.777528 | 126 | 1 | 0 | -5.076899 | 2.214248  | 4.059831  |
| 58  | 1  | 0 | -5.724799 | 1.354059  | -0.999859 | 127 | 1 | 0 | -4.750044 | 3.851459  | 3.468504  |
| 59  | 1  | 0 | -7.814566 | -2.736510 | -2.206988 | 128 | 1 | 0 | -1.500652 | 1.882605  | 2.916367  |
| 60  | 8  | 0 | -0.442277 | -1.415152 | -0.681059 | 129 | 1 | 0 | -2.148500 | 3.319426  | 3.737676  |
| 61  | 15 | 0 | -0.248653 | 0.113069  | -0.133130 | 130 | 1 | 0 | -2.593250 | 1.702666  | 4.301635  |
| 62  | 8  | 0 | -1.642418 | 0.357539  | 0.686731  | 131 | 6 | 0 | -2.481865 | 6.681238  | 0.247680  |
| 63  | 8  | 0 | 0.833806  | 0.178318  | 0.941300  | 132 | 6 | 0 | -3.572066 | 7.564611  | -0.388105 |
| 64  | 6  | 0 | -3.411716 | 2.442162  | -0.114215 | 133 | 6 | 0 | -1.092847 | 7.022565  | -0.323808 |
| 65  | 6  | 0 | -3.327275 | 3.047275  | 1.161247  | 134 | 1 | 0 | -2.460653 | 6.909925  | 1.322358  |
| 66  | 6  | 0 | -3.192428 | 3.219839  | -1.279170 | 135 | 1 | 0 | -4.556024 | 7.350895  | 0.043586  |
| 67  | 6  | 0 | -3.023054 | 4.410822  | 1.244314  | 136 | 1 | 0 | -3.351718 | 8.627268  | -0.229207 |
| 68  | 6  | 0 | -2.898143 | 4.580017  | -1.135180 | 137 | 1 | 0 | -3.638677 | 7.396667  | -1.469566 |
| 69  | 6  | 0 | -2.804273 | 5.198598  | 0.113700  | 138 | 1 | 0 | -0.309605 | 6.421269  | 0.150662  |
| 70  | 6  | 0 | 1.454757  | -3.445924 | -0.022830 | 139 | 1 | 0 | -1.047768 | 6.831473  | -1.402279 |
| 71  | 6  | 0 | 2.566451  | -3.185602 | 0.813884  | 140 | 1 | 0 | -0.856905 | 8.081515  | -0.162552 |
| 72  | 6  | 0 | 1.662002  | -3.787246 | -1.382087 |     |   |   |           |           |           |
| 73  | 6  | 0 | 3.854767  | -3.287756 | 0.271765  |     |   |   |           |           |           |
| 74  | 6  | 0 | 2.969731  | -3.870881 | -1.869335 |     |   |   |           |           |           |
| 75  | 6  | 0 | 4.083959  | -3.630205 | -1.061081 |     |   |   |           |           |           |
| 76  | 8  | 0 | -0.084433 | 0.987816  | -1.345649 |     |   |   |           |           |           |
| 77  | 1  | 0 | 4.712112  | -3.100947 | 0.914684  |     |   |   |           |           |           |
| 78  | 1  | 0 | 3.120220  | -4.144244 | -2.910999 |     |   |   |           |           |           |
| 79  | 1  | 0 | -2.733569 | 5.172957  | -2.031370 |     |   |   |           |           |           |
| 80  | 1  | 0 | -2.963409 | 4.879406  | 2.224667  |     |   |   |           |           |           |
| 81  | 6  | 0 | 0.510084  | -4.107443 | -2.334895 |     |   |   |           |           |           |
| 82  | 6  | 0 | 0.551084  | -5.580288 | -2.788522 |     |   |   |           |           |           |
| 83  | 6  | 0 | 0.478600  | -3.153012 | -3.543761 |     |   |   |           |           |           |
| 84  | 1  | 0 | -0.430233 | -3.970051 | -1.794605 |     |   |   |           |           |           |
| 85  | 1  | 0 | 0.524421  | -6.261150 | -1.930226 |     |   |   |           |           |           |
| 86  | 1  | 0 | -0.309217 | -5.807173 | -3.429844 |     |   |   |           |           |           |
| 87  | 1  | 0 | 1.459977  | -5.800916 | -3.360849 |     |   |   |           |           |           |
| 88  | 1  | 0 | 0.403516  | -2.111718 | -3.216943 |     |   |   |           |           |           |
| 89  | 1  | 0 | 1.377816  | -3.255723 | -4.163166 |     |   |   |           |           |           |
| 90  | 1  | 0 | -0.387095 | -3.374775 | -4.179434 |     |   |   |           |           |           |
| 91  | 6  | 0 | 5.503540  | -3.759200 | -1.599067 |     |   |   |           |           |           |
| 92  | 6  | 0 | 5.763520  | -2.826015 | -2.795771 |     |   |   |           |           |           |
| 93  | 6  | 0 | 5.842037  | -5.218909 | -1.958941 |     |   |   |           |           |           |
| 94  | 1  | 0 | 6.183367  | -3.454827 | -0.791159 |     |   |   |           |           |           |
| 95  | 1  | 0 | 5.556643  | -1.781626 | -2.535548 |     |   |   |           |           |           |
| 96  | 1  | 0 | 6.808096  | -2.896219 | -3.122326 |     |   |   |           |           |           |
| 97  | 1  | 0 | 5.130212  | -3.086071 | -3.651958 |     |   |   |           |           |           |
| 98  | 1  | 0 | 5.700662  | -5.880853 | -1.097738 |     |   |   |           |           |           |
| 99  | 1  | 0 | 5.200952  | -5.585215 | -2.769540 |     |   |   |           |           |           |
| 100 | 1  | 0 | 6.883847  | -5.306044 | -2.290745 |     |   |   |           |           |           |
| 101 | 6  | 0 | 2.422445  | -2.822551 | 2.293027  |     |   |   |           |           |           |
| 102 | 6  | 0 | 3.222802  | -1.565435 | 2.682037  |     |   |   |           |           |           |

TS-1st-(S)-reaction pathway: *S-anti*/(*R*)-1aa (BINOL-TRIP)

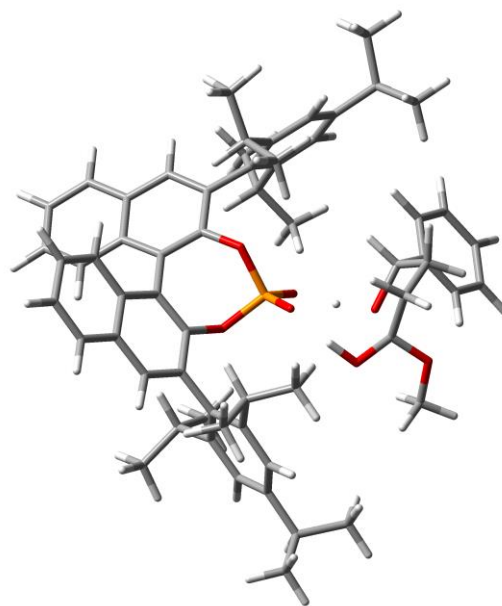

B3LYP/6-31G(d); E(B3LYP) = -3235.350722 hartree

Zero-point Energy Correction = 1.188705 hartree

Thermal Correction to Energy = 1.256319 hartree

Thermal correction to Enthalpy = 1.257264 hartree

|                                                                   |        |        |                         |           |           |           |
|-------------------------------------------------------------------|--------|--------|-------------------------|-----------|-----------|-----------|
| Thermal correction to Gibbs Free Energy= 1.082333 hartree         | 59     | 1      | 0                       | 2.994189  | -4.744789 | 1.717203  |
| Sum of electronic and Zero-point Energies = -3234.162017 hartree  | 60     | 1      | 0                       | 3.406457  | -3.178182 | 2.425025  |
| Sum of electronic and thermal Energies = -3234.094403 hartree     | 61     | 1      | 0                       | 1.004142  | -4.239040 | 3.048038  |
| Sum of electronic and thermal Enthalpies = -3234.093458 hartree   | 62     | 1      | 0                       | 1.008666  | -2.538337 | 2.524167  |
| Sum of electronic and thermal Free Energies= -3234.268389 hartree | 63     | 8      | 0                       | -0.813073 | -3.415198 | 0.867734  |
| The number of Imaginary frequencies = 1                           | 64     | 8      | 0                       | 0.486530  | -5.233352 | 0.726127  |
| -----                                                             | 65     | 6      | 0                       | -0.349143 | -5.707252 | -0.345707 |
| Center                                                            | Atomic | Atomic | Coordinates (Angstroms) |           |           |           |
| Number                                                            | Number | Type   | X                       | Y         | Z         |           |
| -----                                                             | -----  | -----  | -----                   | -----     | -----     | -----     |
| 1                                                                 | 6      | 0      | 0.408319                | -3.913496 | 1.011597  | 66        |
| 2                                                                 | 8      | 0      | 1.366686                | -3.180981 | -0.158080 | 67        |
| 3                                                                 | 6      | 0      | -3.278171               | 5.679260  | 1.796112  | 68        |
| 4                                                                 | 6      | 0      | -2.396064               | 4.834964  | 1.158393  | 69        |
| 5                                                                 | 6      | 0      | -2.794972               | 3.535496  | 0.739311  | 70        |
| 6                                                                 | 6      | 0      | -4.130850               | 3.115117  | 1.035936  | 71        |
| 7                                                                 | 6      | 0      | -5.023033               | 4.017702  | 1.675609  | 72        |
| 8                                                                 | 6      | 0      | -4.610870               | 5.276392  | 2.046260  | 73        |
| 9                                                                 | 1      | 0      | -2.944447               | 6.663092  | 2.114799  | 74        |
| 10                                                                | 1      | 0      | -1.376386               | 5.157740  | 0.983815  | 75        |
| 11                                                                | 6      | 0      | -1.912266               | 2.618370  | 0.067056  | 76        |
| 12                                                                | 6      | 0      | -4.534325               | 1.797053  | 0.705600  | 77        |
| 13                                                                | 1      | 0      | -6.037462               | 3.684375  | 1.881362  | 78        |
| 14                                                                | 1      | 0      | -5.298880               | 5.955336  | 2.542485  | 79        |
| 15                                                                | 6      | 0      | -3.662662               | 0.867448  | 0.176396  | 80        |
| 16                                                                | 6      | 0      | -2.339771               | 1.311448  | -0.114381 | 81        |
| 17                                                                | 1      | 0      | -5.561154               | 1.503303  | 0.905165  | 82        |
| 18                                                                | 6      | 0      | -0.570431               | 3.048248  | -0.422171 | 83        |
| 19                                                                | 6      | 0      | -0.429484               | 4.178887  | -1.302990 | 84        |
| 20                                                                | 6      | 0      | 0.576390                | 2.357511  | -0.054001 | 85        |
| 21                                                                | 6      | 0      | -1.536769               | 4.836618  | -1.907716 | 86        |
| 22                                                                | 6      | 0      | 0.883967                | 4.652553  | -1.618798 | 87        |
| 23                                                                | 6      | 0      | 1.893070                | 2.804480  | -0.367727 | 88        |
| 24                                                                | 6      | 0      | -1.354880               | 5.919782  | -2.739119 | 89        |
| 25                                                                | 1      | 0      | -2.538194               | 4.468028  | -1.720192 | 90        |
| 26                                                                | 6      | 0      | 1.037461                | 5.785777  | -2.462747 | 91        |
| 27                                                                | 6      | 0      | 2.010834                | 3.963643  | -1.106668 | 92        |
| 28                                                                | 6      | 0      | -0.057015               | 6.412729  | -3.010507 | 93        |
| 29                                                                | 1      | 0      | -2.218049               | 6.396772  | -3.195455 | 94        |
| 30                                                                | 1      | 0      | 2.043424                | 6.137094  | -2.679972 | 95        |
| 31                                                                | 1      | 0      | 3.002651                | 4.343547  | -1.338155 | 96        |
| 32                                                                | 1      | 0      | 0.071590                | 7.273283  | -3.661247 | 97        |
| 33                                                                | 8      | 0      | -1.458805               | 0.394423  | -0.684193 | 98        |
| 34                                                                | 15     | 0      | -0.226409               | -0.155794 | 0.236939  | 99        |
| 35                                                                | 8      | 0      | 0.470132                | 1.229223  | 0.749832  | 100       |
| 36                                                                | 8      | 0      | -0.672527               | -0.894251 | 1.472303  | 101       |
| 37                                                                | 6      | 0      | 3.119987                | 2.062952  | 0.072772  | 102       |
| 38                                                                | 6      | 0      | 3.497521                | 2.049312  | 1.438519  | 103       |
| 39                                                                | 6      | 0      | 3.940979                | 1.429809  | -0.891001 | 104       |
| 40                                                                | 6      | 0      | 4.683178                | 1.407928  | 1.808015  | 105       |
| 41                                                                | 6      | 0      | 5.124012                | 0.810544  | -0.463072 | 106       |
| 42                                                                | 6      | 0      | 5.518889                | 0.786342  | 0.875283  | 107       |
| 43                                                                | 6      | 0      | -4.120852               | -0.535598 | -0.096420 | 108       |
| 44                                                                | 6      | 0      | -4.427925               | -1.406163 | 0.980775  | 109       |
| 45                                                                | 6      | 0      | -4.315925               | -0.969496 | -1.428355 | 110       |
| 46                                                                | 6      | 0      | -4.931314               | -2.679586 | 0.694361  | 111       |
| 47                                                                | 6      | 0      | -4.820690               | -2.255177 | -1.653659 | 112       |
| 48                                                                | 6      | 0      | -5.140608               | -3.126343 | -0.612691 | 113       |
| 49                                                                | 8      | 0      | 0.679439                | -0.915908 | -0.733926 | 114       |
| 50                                                                | 1      | 0      | -5.169583               | -3.341605 | 1.522800  | 115       |
| 51                                                                | 1      | 0      | -4.981278               | -2.585526 | -2.677781 | 116       |
| 52                                                                | 1      | 0      | 5.766709                | 0.341095  | -1.205176 | 117       |
| 53                                                                | 1      | 0      | 4.971919                | 1.412962  | 2.856369  | 118       |
| 54                                                                | 1      | 0      | -0.845473               | -2.445160 | 1.162483  | 119       |
| 55                                                                | 6      | 0      | 2.736104                | -3.068729 | 0.345032  | 120       |
| 56                                                                | 6      | 0      | 2.703541                | -3.691688 | 1.763001  | 121       |
| 57                                                                | 6      | 0      | 1.253035                | -3.562139 | 2.226080  | 122       |
| 58                                                                | 1      | 0      | 2.949209                | -1.997323 | 0.411866  | 123       |
|                                                                   |        |        |                         |           |           | 124       |
|                                                                   |        |        |                         |           |           | 125       |
|                                                                   |        |        |                         |           |           | 126       |
|                                                                   |        |        |                         |           |           | 127       |
|                                                                   |        |        |                         |           |           | 128       |
|                                                                   |        |        |                         |           |           | 129       |
|                                                                   |        |        |                         |           |           | 130       |
|                                                                   |        |        |                         |           |           | 131       |
|                                                                   |        |        |                         |           |           | 132       |
|                                                                   |        |        |                         |           |           | 133       |
|                                                                   |        |        |                         |           |           | 134       |
|                                                                   |        |        |                         |           |           | 135       |
|                                                                   |        |        |                         |           |           | 136       |
|                                                                   |        |        |                         |           |           | 137       |
|                                                                   |        |        |                         |           |           | 138       |
|                                                                   |        |        |                         |           |           | 139       |
|                                                                   |        |        |                         |           |           | 140       |
|                                                                   |        |        |                         |           |           | 141       |
|                                                                   |        |        |                         |           |           | 142       |
|                                                                   |        |        |                         |           |           | 143       |
|                                                                   |        |        |                         |           |           | 144       |
|                                                                   |        |        |                         |           |           | 145       |
|                                                                   |        |        |                         |           |           | 146       |
|                                                                   |        |        |                         |           |           | 147       |
|                                                                   |        |        |                         |           |           | 148       |
|                                                                   |        |        |                         |           |           | 149       |
|                                                                   |        |        |                         |           |           | 150       |
|                                                                   |        |        |                         |           |           | 151       |
|                                                                   |        |        |                         |           |           | 152       |
|                                                                   |        |        |                         |           |           | 153       |
|                                                                   |        |        |                         |           |           | 154       |
|                                                                   |        |        |                         |           |           | 155       |
|                                                                   |        |        |                         |           |           | 156       |
|                                                                   |        |        |                         |           |           | 157       |
|                                                                   |        |        |                         |           |           | 158       |
|                                                                   |        |        |                         |           |           | 159       |
|                                                                   |        |        |                         |           |           | 160       |
|                                                                   |        |        |                         |           |           | 161       |
|                                                                   |        |        |                         |           |           | 162       |
|                                                                   |        |        |                         |           |           | 163       |
|                                                                   |        |        |                         |           |           | 164       |
|                                                                   |        |        |                         |           |           | 165       |
|                                                                   |        |        |                         |           |           | 166       |
|                                                                   |        |        |                         |           |           | 167       |
|                                                                   |        |        |                         |           |           | 168       |
|                                                                   |        |        |                         |           |           | 169       |
|                                                                   |        |        |                         |           |           | 170       |
|                                                                   |        |        |                         |           |           | 171       |
|                                                                   |        |        |                         |           |           | 172       |
|                                                                   |        |        |                         |           |           | 173       |
|                                                                   |        |        |                         |           |           | 174       |
|                                                                   |        |        |                         |           |           | 175       |
|                                                                   |        |        |                         |           |           | 176       |
|                                                                   |        |        |                         |           |           | 177       |
|                                                                   |        |        |                         |           |           | 178       |
|                                                                   |        |        |                         |           |           | 179       |
|                                                                   |        |        |                         |           |           | 180       |
|                                                                   |        |        |                         |           |           | 181       |
|                                                                   |        |        |                         |           |           | 182       |
|                                                                   |        |        |                         |           |           | 183       |
|                                                                   |        |        |                         |           |           | 184       |
|                                                                   |        |        |                         |           |           | 185       |
|                                                                   |        |        |                         |           |           | 186       |
|                                                                   |        |        |                         |           |           | 187       |
|                                                                   |        |        |                         |           |           | 188       |
|                                                                   |        |        |                         |           |           | 189       |
|                                                                   |        |        |                         |           |           | 190       |
|                                                                   |        |        |                         |           |           | 191       |
|                                                                   |        |        |                         |           |           | 192       |
|                                                                   |        |        |                         |           |           | 193       |
|                                                                   |        |        |                         |           |           | 194       |
|                                                                   |        |        |                         |           |           | 195       |
|                                                                   |        |        |                         |           |           | 196       |
|                                                                   |        |        |                         |           |           | 197       |
|                                                                   |        |        |                         |           |           | 198       |
|                                                                   |        |        |                         |           |           | 199       |
|                                                                   |        |        |                         |           |           | 200       |

|     |   |   |           |           |           |
|-----|---|---|-----------|-----------|-----------|
| 128 | 1 | 0 | -3.764306 | -5.521101 | -0.918158 |
| 129 | 1 | 0 | -4.597580 | -5.601721 | 0.642224  |
| 130 | 1 | 0 | -5.146819 | -6.615436 | -0.703573 |
| 131 | 6 | 0 | -4.041832 | -0.074228 | -2.636127 |
| 132 | 6 | 0 | -5.342006 | 0.253334  | -3.397344 |
| 133 | 6 | 0 | -2.984484 | -0.680422 | -3.578347 |
| 134 | 1 | 0 | -3.640610 | 0.876296  | -2.274183 |
| 135 | 1 | 0 | -6.078843 | 0.727987  | -2.739485 |
| 136 | 1 | 0 | -5.136688 | 0.938404  | -4.229033 |
| 137 | 1 | 0 | -5.801819 | -0.649716 | -3.816063 |
| 138 | 1 | 0 | -2.051389 | -0.878506 | -3.042862 |
| 139 | 1 | 0 | -3.331896 | -1.620524 | -4.023789 |
| 140 | 1 | 0 | -2.767034 | 0.013103  | -4.399759 |

TS-2nd-(S)-reaction pathway: S-si/(R)-1aa (BINOL-TRIP)

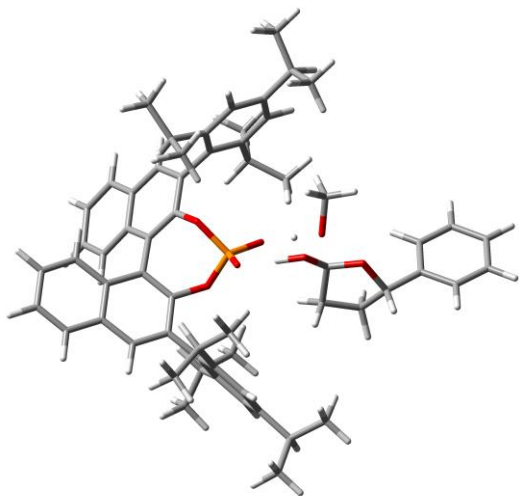

B3LYP/6-31G(d); E(B3LYP) = -3235.349372 hartree  
 Zero-point Energy Correction = 1.189023 hartree  
 Thermal Correction to Energy = 1.256845 hartree  
 Thermal correction to Enthalpy = 1.257789 hartree  
 Thermal correction to Gibbs Free Energy = 1.080712 hartree  
 Sum of electronic and Zero-point Energies = -3234.160349 hartree  
 Sum of electronic and thermal Energies = -3234.092527 hartree  
 Sum of electronic and thermal Enthalpies = -3234.091583 hartree  
 Sum of electronic and thermal Free Energies = -3234.268660 hartree  
 The number of Imaginary frequencies = 1

| Center Number | Atomic Number | Atomic Type | Coordinates (Angstroms) |           |           |
|---------------|---------------|-------------|-------------------------|-----------|-----------|
|               |               |             | X                       | Y         | Z         |
| 1             | 6             | 0           | 3.593780                | 0.163254  | -0.920658 |
| 2             | 8             | 0           | 4.914947                | -0.080134 | -1.087346 |
| 3             | 8             | 0           | 3.060805                | -1.140759 | 0.021213  |
| 4             | 1             | 0           | 1.952467                | 0.301169  | -1.917569 |
| 5             | 6             | 0           | 5.715335                | 0.652770  | -0.100558 |
| 6             | 6             | 0           | 4.686275                | 1.237039  | 0.889430  |
| 7             | 6             | 0           | 3.412159                | 1.329746  | 0.044731  |
| 8             | 1             | 0           | 6.198864                | 1.460136  | -0.662545 |
| 9             | 1             | 0           | 4.540318                | 0.557531  | 1.733116  |
| 10            | 1             | 0           | 5.016605                | 2.201633  | 1.284213  |
| 11            | 1             | 0           | 2.487855                | 1.271249  | 0.619347  |
| 12            | 1             | 0           | 3.381927                | 2.244692  | -0.556914 |
| 13            | 8             | 0           | 2.934851                | 0.090640  | -2.066566 |
| 14            | 6             | 0           | 3.129555                | -2.408014 | -0.670980 |
| 15            | 1             | 0           | 2.590773                | -3.138474 | -0.065053 |
| 16            | 1             | 0           | 2.670922                | -2.326219 | -1.659292 |
| 17            | 1             | 0           | 4.180773                | -2.682472 | -0.765870 |
| 18            | 6             | 0           | 6.775854                | -0.243233 | 0.491683  |

|    |    |   |           |           |           |
|----|----|---|-----------|-----------|-----------|
| 19 | 6  | 0 | 6.429841  | -1.406145 | 1.195055  |
| 20 | 6  | 0 | 8.126839  | 0.090605  | 0.357102  |
| 21 | 6  | 0 | 7.418939  | -2.214597 | 1.751219  |
| 22 | 1  | 0 | 5.382936  | -1.675882 | 1.302384  |
| 23 | 6  | 0 | 9.119336  | -0.713761 | 0.921343  |
| 24 | 1  | 0 | 8.405959  | 0.985453  | -0.194694 |
| 25 | 6  | 0 | 8.766907  | -1.869105 | 1.618065  |
| 26 | 1  | 0 | 7.138903  | -3.114719 | 2.291965  |
| 27 | 1  | 0 | 10.164934 | -0.439779 | 0.810143  |
| 28 | 1  | 0 | 9.536806  | -2.499440 | 2.054792  |
| 29 | 6  | 0 | -6.661553 | 1.549016  | -1.535213 |
| 30 | 6  | 0 | -5.597187 | 0.912944  | -0.935087 |
| 31 | 6  | 0 | -4.401474 | 1.616953  | -0.621612 |
| 32 | 6  | 0 | -4.321844 | 3.000110  | -0.984843 |
| 33 | 6  | 0 | -5.445150 | 3.631804  | -1.583741 |
| 34 | 6  | 0 | -6.594793 | 2.926032  | -1.851733 |
| 35 | 1  | 0 | -7.559550 | 0.985059  | -1.772761 |
| 36 | 1  | 0 | -5.662887 | -0.144771 | -0.708651 |
| 37 | 6  | 0 | -3.264146 | 0.996256  | 0.005043  |
| 38 | 6  | 0 | -3.116172 | 3.711911  | -0.760102 |
| 39 | 1  | 0 | -5.369971 | 4.685530  | -1.841722 |
| 40 | 1  | 0 | -7.444335 | 3.417370  | -2.318044 |
| 41 | 6  | 0 | -1.981947 | 3.101170  | -0.267297 |
| 42 | 6  | 0 | -2.085796 | 1.724749  | 0.087506  |
| 43 | 1  | 0 | -3.082708 | 4.769115  | -1.008891 |
| 44 | 6  | 0 | -3.326360 | -0.394649 | 0.544242  |
| 45 | 6  | 0 | -4.318986 | -0.784528 | 1.511322  |
| 46 | 6  | 0 | -2.399012 | -1.344850 | 0.140220  |
| 47 | 6  | 0 | -5.199581 | 0.139779  | 2.139099  |
| 48 | 6  | 0 | -4.409884 | -2.162203 | 1.892913  |
| 49 | 6  | 0 | -2.457612 | -2.717000 | 0.522090  |
| 50 | 6  | 0 | -6.138485 | -0.280380 | 3.055474  |
| 51 | 1  | 0 | -5.119100 | 1.193400  | 1.899250  |
| 52 | 6  | 0 | -5.403204 | -2.566260 | 2.825498  |
| 53 | 6  | 0 | -3.487650 | -3.096331 | 1.357212  |
| 54 | 6  | 0 | -6.255315 | -1.648716 | 3.394331  |
| 55 | 1  | 0 | -6.792647 | 0.448461  | 3.526387  |
| 56 | 1  | 0 | -5.464321 | -3.618518 | 3.093100  |
| 57 | 1  | 0 | -3.580094 | -4.140685 | 1.643775  |
| 58 | 1  | 0 | -7.005929 | -1.967836 | 4.112196  |
| 59 | 8  | 0 | -0.954175 | 1.113686  | 0.616971  |
| 60 | 15 | 0 | -0.174813 | -0.004512 | -0.288359 |
| 61 | 8  | 0 | -1.403114 | -0.977834 | -0.754716 |
| 62 | 8  | 0 | 0.433979  | 0.559045  | -1.542038 |
| 63 | 6  | 0 | -1.445408 | -3.715230 | 0.041412  |
| 64 | 6  | 0 | -1.441593 | -4.130572 | -1.313188 |
| 65 | 6  | 0 | -0.516307 | -4.275837 | 0.950947  |
| 66 | 6  | 0 | -0.513406 | -5.090377 | -1.727249 |
| 67 | 6  | 0 | 0.388338  | -5.237902 | 0.480215  |
| 68 | 6  | 0 | 0.411802  | -5.661593 | -0.849054 |
| 69 | 6  | 0 | -0.708916 | 3.876494  | -0.082399 |
| 70 | 6  | 0 | 0.053637  | 4.278738  | -1.207974 |
| 71 | 6  | 0 | -0.298194 | 4.255032  | 1.216795  |
| 72 | 6  | 0 | 1.196096  | 5.060514  | -1.002647 |
| 73 | 6  | 0 | 0.857040  | 5.032447  | 1.362468  |
| 74 | 6  | 0 | 1.617201  | 5.452823  | 0.271088  |
| 75 | 8  | 0 | 0.753168  | -0.704875 | 0.701350  |
| 76 | 1  | 0 | 1.771126  | 5.376567  | -1.869174 |
| 77 | 1  | 0 | 1.167572  | 5.332179  | 2.361262  |
| 78 | 1  | 0 | 1.094724  | -5.681651 | 1.179042  |
| 79 | 1  | 0 | -0.523119 | -5.408811 | -2.766759 |
| 80 | 1  | 0 | 2.013164  | -0.948826 | 0.321726  |
| 81 | 6  | 0 | -2.450570 | -3.605905 | -2.334755 |
| 82 | 6  | 0 | -3.407266 | -4.724895 | -2.793486 |
| 83 | 6  | 0 | -1.765865 | -2.932442 | -3.539084 |
| 84 | 1  | 0 | -3.065371 | -2.844153 | -1.848071 |
| 85 | 1  | 0 | -3.929144 | -5.175531 | -1.941719 |
| 86 | 1  | 0 | -4.161531 | -4.325766 | -3.482547 |
| 87 | 1  | 0 | -2.868883 | -5.524672 | -3.315800 |

|     |   |   |           |           |           |
|-----|---|---|-----------|-----------|-----------|
| 88  | 1 | 0 | -1.123489 | -2.108489 | -3.214997 |
| 89  | 1 | 0 | -1.153967 | -3.643802 | -4.106927 |
| 90  | 1 | 0 | -2.519836 | -2.526995 | -4.224475 |
| 91  | 6 | 0 | 1.398356  | -6.727068 | -1.310201 |
| 92  | 6 | 0 | 2.331197  | -6.216032 | -2.423902 |
| 93  | 6 | 0 | 0.677984  | -8.017199 | -1.747040 |
| 94  | 1 | 0 | 2.027138  | -6.979934 | -0.445084 |
| 95  | 1 | 0 | 2.879140  | -5.321969 | -2.105549 |
| 96  | 1 | 0 | 3.064585  | -6.984190 | -2.696999 |
| 97  | 1 | 0 | 1.769513  | -5.956502 | -3.328795 |
| 98  | 1 | 0 | 0.042289  | -8.406197 | -0.944206 |
| 99  | 1 | 0 | 0.040176  | -7.838745 | -2.620878 |
| 100 | 1 | 0 | 1.403403  | -8.794444 | -2.016339 |
| 101 | 6 | 0 | -0.466852 | -3.899638 | 2.433428  |
| 102 | 6 | 0 | 0.927772  | -3.421017 | 2.878820  |
| 103 | 6 | 0 | -0.948839 | -5.067410 | 3.318078  |
| 104 | 1 | 0 | -1.150587 | -3.062401 | 2.594547  |
| 105 | 1 | 0 | 1.236800  | -2.546719 | 2.299978  |
| 106 | 1 | 0 | 0.904835  | -3.135408 | 3.937623  |
| 107 | 1 | 0 | 1.686265  | -4.205820 | 2.769148  |
| 108 | 1 | 0 | -1.960826 | -5.388344 | 3.046841  |
| 109 | 1 | 0 | -0.290089 | -5.939006 | 3.221373  |
| 110 | 1 | 0 | -0.958667 | -4.770970 | 4.373961  |
| 111 | 6 | 0 | -0.336655 | 3.914883  | -2.641882 |
| 112 | 6 | 0 | 0.836329  | 3.334427  | -3.453493 |
| 113 | 6 | 0 | -0.943380 | 5.127380  | -3.377488 |
| 114 | 1 | 0 | -1.102006 | 3.135508  | -2.594591 |
| 115 | 1 | 0 | 1.276865  | 2.474675  | -2.944451 |
| 116 | 1 | 0 | 0.478492  | 2.999000  | -4.434152 |
| 117 | 1 | 0 | 1.622695  | 4.077774  | -3.633105 |
| 118 | 1 | 0 | -1.820461 | 5.524390  | -2.855153 |
| 119 | 1 | 0 | -0.213246 | 5.941573  | -3.463322 |
| 120 | 1 | 0 | -1.252378 | 4.845946  | -4.391489 |
| 121 | 6 | 0 | 2.854921  | 6.318914  | 0.470415  |
| 122 | 6 | 0 | 2.713830  | 7.691154  | -0.215004 |
| 123 | 6 | 0 | 4.139436  | 5.604925  | 0.008621  |
| 124 | 1 | 0 | 2.951290  | 6.499861  | 1.549878  |
| 125 | 1 | 0 | 1.821669  | 8.219154  | 0.138596  |
| 126 | 1 | 0 | 3.588267  | 8.319712  | -0.007319 |
| 127 | 1 | 0 | 2.630027  | 7.586162  | -1.303107 |
| 128 | 1 | 0 | 4.273154  | 4.654478  | 0.538553  |
| 129 | 1 | 0 | 4.110619  | 5.389128  | -1.066162 |
| 130 | 1 | 0 | 5.021627  | 6.227842  | 0.200087  |
| 131 | 6 | 0 | -1.087718 | 3.883241  | 2.471736  |
| 132 | 6 | 0 | -1.654308 | 5.135619  | 3.169937  |
| 133 | 6 | 0 | -0.253955 | 3.031007  | 3.447233  |
| 134 | 1 | 0 | -1.945358 | 3.276501  | 2.168883  |
| 135 | 1 | 0 | -2.283654 | 5.718615  | 2.488085  |
| 136 | 1 | 0 | -2.264684 | 4.848862  | 4.034855  |
| 137 | 1 | 0 | -0.855027 | 5.793932  | 3.530463  |
| 138 | 1 | 0 | 0.095651  | 2.114458  | 2.962660  |
| 139 | 1 | 0 | 0.619814  | 3.580536  | 3.817800  |
| 140 | 1 | 0 | -0.858794 | 2.746929  | 4.316987  |

## Optimization of 2b

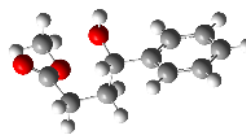

B3LYP/6-31G(d); E(B3LYP) = -653.274726 hartree

Zero-point Energy Correction = 0.234057 hartree

Thermal Correction to Energy = 0.247971 hartree

Thermal correction to Enthalpy = 0.248915 hartree

Thermal correction to Gibbs Free Energy = 0.191349 hartree

Sum of electronic and Zero-point Energies = -653.040668 hartree

Sum of electronic and thermal Energies = -653.026754 hartree

Sum of electronic and thermal Enthalpies = -653.025810 hartree

Sum of electronic and thermal Free Energies = -653.083376 hartree

The number of Imaginary frequencies = 0

| Center Number | Atomic Number | Atomic Type | Coordinates (Angstroms) |            |           |
|---------------|---------------|-------------|-------------------------|------------|-----------|
|               |               |             | X                       | Y          | Z         |
| 1             | 6             | 0           | -1.145559               | -7.189336  | -1.331531 |
| 2             | 8             | 0           | -2.382908               | -6.447537  | 0.909662  |
| 3             | 6             | 0           | -3.636772               | -6.205161  | 0.281979  |
| 4             | 6             | 0           | -3.672751               | -7.028859  | -1.019504 |
| 5             | 6             | 0           | -2.460584               | -6.731717  | -1.920072 |
| 6             | 1             | 0           | -3.713200               | -5.140261  | 0.018305  |
| 7             | 1             | 0           | -3.689589               | -8.094816  | -0.768823 |
| 8             | 1             | 0           | -4.594410               | -6.811168  | -1.571482 |
| 9             | 1             | 0           | -2.583169               | -7.253118  | -2.878401 |
| 10            | 1             | 0           | -2.377321               | -5.661606  | -2.133667 |
| 11            | 8             | 0           | -0.137355               | -6.497962  | -1.201896 |
| 12            | 8             | 0           | -1.145795               | -8.487883  | -1.037720 |
| 13            | 6             | 0           | 0.031886                | -8.992576  | -0.380058 |
| 14            | 1             | 0           | -0.156670               | -10.055145 | -0.227728 |
| 15            | 1             | 0           | 0.916350                | -8.839789  | -1.002215 |
| 16            | 1             | 0           | 0.164104                | -8.481318  | 0.576258  |
| 17            | 1             | 0           | -1.964030               | -5.580516  | 1.091839  |
| 18            | 6             | 0           | -4.806848               | -6.565530  | 1.190496  |
| 19            | 6             | 0           | -4.611256               | -7.328036  | 2.346058  |
| 20            | 6             | 0           | -6.107230               | -6.158020  | 0.862548  |
| 21            | 6             | 0           | -5.694122               | -7.681768  | 3.153856  |
| 22            | 1             | 0           | -3.601400               | -7.626055  | 2.606429  |
| 23            | 6             | 0           | -7.190380               | -6.510585  | 1.668079  |
| 24            | 1             | 0           | -6.273630               | -5.551914  | -0.025975 |
| 25            | 6             | 0           | -6.986692               | -7.277175  | 2.817861  |
| 26            | 1             | 0           | -5.525705               | -8.272553  | 4.050997  |
| 27            | 1             | 0           | -8.192266               | -6.183368  | 1.400879  |
| 28            | 1             | 0           | -7.828542               | -7.551025  | 3.448547  |

Optimized structure of SPINOL-derived CPA (S)-1ba (TRIP)

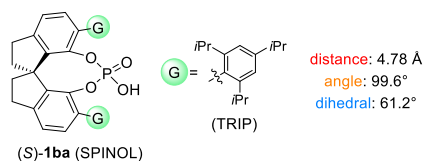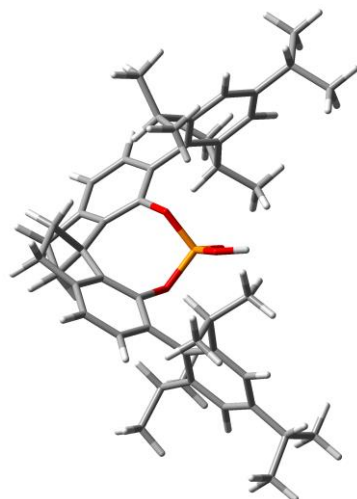

B3LYP/6-31G(d); E(B3LYP) = -2468.936485 hartree

Zero-point Energy Correction = 0.961056 hartree

Thermal Correction to Energy = 1.013669 hartree

Thermal correction to Enthalpy = 1.014613 hartree

Thermal correction to Gibbs Free Energy = 0.874815 hartree

Sum of electronic and Zero-point Energies = -2467.975429 hartree

Sum of electronic and thermal Energies = -2467.922816 hartree

Sum of electronic and thermal Enthalpies = -2467.921872 hartree

Sum of electronic and thermal Free Energies = -2468.061670 hartree

The number of Imaginary frequencies = 0

| Center Number | Atomic Number | Atomic Type | Coordinates (Angstroms) |          |           |
|---------------|---------------|-------------|-------------------------|----------|-----------|
|               |               |             | X                       | Y        | Z         |
| 1             | 6             | 0           | 1.245628                | 2.659809 | -0.599023 |
| 2             | 6             | 0           | 1.851110                | 1.453784 | -0.257001 |
| 3             | 6             | 0           | 3.802239                | 2.066702 | -1.505940 |
| 4             | 6             | 0           | 3.163066                | 3.215797 | -1.972527 |
| 5             | 6             | 0           | 1.880384                | 3.504861 | -1.522440 |
| 6             | 1             | 0           | 4.822574                | 1.862277 | -1.811455 |
| 7             | 1             | 0           | 3.672265                | 3.878222 | -2.668197 |
| 8             | 6             | 0           | 0.983660                | 4.670694 | -1.880954 |
| 9             | 1             | 0           | 1.343270                | 5.607497 | -1.433002 |
| 10            | 1             | 0           | 0.933374                | 4.840346 | -2.962669 |
| 11            | 6             | 0           | 0.000430                | 3.351371 | -0.053752 |
| 12            | 6             | 0           | -0.376096               | 4.244674 | -1.282889 |
| 13            | 1             | 0           | -0.927012               | 3.633827 | -2.007225 |
| 14            | 1             | 0           | -1.013325               | 5.090239 | -1.006094 |
| 15            | 6             | 0           | 0.375678                | 4.270834 | 1.159077  |
| 16            | 1             | 0           | 0.954174                | 3.681883 | 1.880051  |
| 17            | 1             | 0           | 0.988491                | 5.126455 | 0.860099  |
| 18            | 6             | 0           | -0.978788               | 4.669847 | 1.779079  |
| 19            | 1             | 0           | -1.381022               | 5.580422 | 1.313194  |
| 20            | 1             | 0           | -0.909955               | 4.871288 | 2.854206  |
| 21            | 6             | 0           | -1.841652               | 3.466573 | 1.471088  |
| 22            | 6             | 0           | -1.221292               | 2.638520 | 0.521043  |
| 23            | 6             | 0           | -3.083134               | 3.134321 | 1.998144  |
| 24            | 1             | 0           | -3.575610               | 3.784848 | 2.716592  |
| 25            | 6             | 0           | -1.806850               | 1.413174 | 0.206644  |
| 26            | 8             | 0           | 1.140220                | 0.550387 | 0.547915  |

|    |    |   |           |           |           |
|----|----|---|-----------|-----------|-----------|
| 27 | 8  | 0 | -1.139266 | 0.548406  | -0.670862 |
| 28 | 15 | 0 | 0.054459  | -0.425387 | -0.158741 |
| 29 | 8  | 0 | -0.497511 | -1.191067 | 1.103967  |
| 30 | 8  | 0 | 0.542999  | -1.232194 | -1.306187 |
| 31 | 6  | 0 | 3.160802  | 1.137939  | -0.669069 |
| 32 | 6  | 0 | -3.072044 | 1.049247  | 0.710536  |
| 33 | 6  | 0 | 3.890130  | -0.096237 | -0.221034 |
| 34 | 6  | 0 | 4.227819  | -0.258740 | 1.145571  |
| 35 | 6  | 0 | 4.314839  | -1.068640 | -1.166192 |
| 36 | 6  | 0 | 4.963595  | -1.384508 | 1.533858  |
| 37 | 6  | 0 | 5.052809  | -2.168863 | -0.717827 |
| 38 | 6  | 0 | 5.388372  | -2.352326 | 0.625445  |
| 39 | 1  | 0 | 5.225653  | -1.504556 | 2.582892  |
| 40 | 1  | 0 | 5.373251  | -2.908458 | -1.446446 |
| 41 | 6  | 0 | -3.697716 | 1.953386  | 1.584850  |
| 42 | 1  | 0 | -4.686586 | 1.705293  | 1.956078  |
| 43 | 6  | 0 | -3.807330 | -0.205764 | 0.330710  |
| 44 | 6  | 0 | -4.090335 | -1.195246 | 1.306669  |
| 45 | 6  | 0 | -4.339386 | -0.342587 | -0.976919 |
| 46 | 6  | 0 | -4.909025 | -2.276386 | 0.953247  |
| 47 | 6  | 0 | -5.143833 | -1.448346 | -1.273453 |
| 48 | 6  | 0 | -5.456568 | -2.422627 | -0.322347 |
| 49 | 1  | 0 | -5.146567 | -3.023296 | 1.707638  |
| 50 | 1  | 0 | -5.561046 | -1.532375 | -2.273790 |
| 51 | 6  | 0 | 3.881313  | 0.769948  | 2.223099  |
| 52 | 6  | 0 | 5.154689  | 1.428205  | 2.792127  |
| 53 | 6  | 0 | 3.019162  | 0.167110  | 3.348610  |
| 54 | 1  | 0 | 3.295985  | 1.569427  | 1.762622  |
| 55 | 1  | 0 | 5.747178  | 1.896815  | 1.998268  |
| 56 | 1  | 0 | 4.891964  | 2.202638  | 3.523375  |
| 57 | 1  | 0 | 5.795260  | 0.696373  | 3.298097  |
| 58 | 1  | 0 | 2.099685  | -0.269395 | 2.948046  |
| 59 | 1  | 0 | 3.558817  | -0.614626 | 3.896406  |
| 60 | 1  | 0 | 2.742685  | 0.943828  | 4.072488  |
| 61 | 6  | 0 | 4.025368  | -0.962502 | -2.665910 |
| 62 | 6  | 0 | 3.462377  | -2.264224 | -3.267067 |
| 63 | 6  | 0 | 5.288615  | -0.547038 | -3.450549 |
| 64 | 1  | 0 | 3.266478  | -0.188159 | -2.809747 |
| 65 | 1  | 0 | 2.604132  | -2.641722 | -2.709281 |
| 66 | 1  | 0 | 3.140729  | -2.087116 | -4.300268 |
| 67 | 1  | 0 | 4.218160  | -3.058450 | -3.298250 |
| 68 | 1  | 0 | 5.709539  | 0.399764  | -3.096925 |
| 69 | 1  | 0 | 6.072008  | -1.308874 | -3.355984 |
| 70 | 1  | 0 | 5.057540  | -0.436721 | -4.517168 |
| 71 | 6  | 0 | 6.192707  | -3.558990 | 1.090993  |
| 72 | 6  | 0 | 7.586133  | -3.611883 | 0.436834  |
| 73 | 6  | 0 | 5.427962  | -4.872755 | 0.866283  |
| 74 | 1  | 0 | 6.342789  | -3.447739 | 2.173822  |
| 75 | 1  | 0 | 8.146540  | -2.689689 | 0.625500  |
| 76 | 1  | 0 | 8.168296  | -4.453024 | 0.832485  |
| 77 | 1  | 0 | 7.511993  | -3.740811 | -0.649412 |
| 78 | 1  | 0 | 4.455769  | -4.856856 | 1.371571  |
| 79 | 1  | 0 | 5.247123  | -5.054780 | -0.200460 |
| 80 | 1  | 0 | 5.998589  | -5.729378 | 1.255559  |
| 81 | 6  | 0 | -3.575303 | -1.120770 | 2.746822  |
| 82 | 6  | 0 | -2.900549 | -2.425662 | 3.212581  |
| 83 | 6  | 0 | -4.706324 | -0.753234 | 3.730802  |
| 84 | 1  | 0 | -2.817031 | -0.334481 | 2.793825  |
| 85 | 1  | 0 | -2.103424 | -2.737121 | 2.533920  |
| 86 | 1  | 0 | -2.458229 | -2.281147 | 4.205395  |
| 87 | 1  | 0 | -3.619115 | -3.249971 | 3.295806  |
| 88 | 1  | 0 | -5.182158 | 0.198886  | 3.476098  |
| 89 | 1  | 0 | -5.488272 | -1.522296 | 3.734348  |
| 90 | 1  | 0 | -4.313752 | -0.671123 | 4.751657  |
| 91 | 6  | 0 | -4.135110 | 0.709512  | -2.067943 |
| 92 | 6  | 0 | -5.463136 | 1.412613  | -2.414889 |
| 93 | 6  | 0 | -3.470954 | 0.123700  | -3.327380 |
| 94 | 1  | 0 | -3.463982 | 1.479708  | -1.680929 |
| 95 | 1  | 0 | -5.913316 | 1.870169  | -1.526715 |

|     |   |   |           |           |           |     |   |   |           |           |           |
|-----|---|---|-----------|-----------|-----------|-----|---|---|-----------|-----------|-----------|
| 96  | 1 | 0 | -5.295656 | 2.202738  | -3.156991 | 105 | 1 | 0 | -4.951647 | -4.842898 | -1.662334 |
| 97  | 1 | 0 | -6.193085 | 0.710654  | -2.835130 | 106 | 1 | 0 | -6.642571 | -5.257852 | -1.996727 |
| 98  | 1 | 0 | -2.508934 | -0.338894 | -3.088368 | 107 | 1 | 0 | -5.914301 | -3.834828 | -2.753888 |
| 99  | 1 | 0 | -4.101017 | -0.634878 | -3.806364 | 108 | 1 | 0 | -8.193991 | -2.486944 | 0.020690  |
| 100 | 1 | 0 | -3.293400 | 0.915703  | -4.065216 | 109 | 1 | 0 | -7.906736 | -2.406345 | -1.723981 |
| 101 | 6 | 0 | -6.407780 | -3.572226 | -0.633053 | 110 | 1 | 0 | -8.537398 | -3.897052 | -1.002647 |
| 102 | 6 | 0 | -5.949901 | -4.424203 | -1.830248 | 111 | 1 | 0 | -0.409563 | -2.190578 | 1.037576  |
| 103 | 6 | 0 | -7.846302 | -3.059999 | -0.845690 |     |   |   |           |           |           |
| 104 | 1 | 0 | -6.420904 | -4.226497 | 0.249727  |     |   |   |           |           |           |

DFT calculation for full conformational search of real system using SPINOL-derive CPA (*S*)-1ba/racemic-2b

| TS 1st        | orientation I |      | Orientation II |      | $\Delta\Delta G^\ddagger$ (a.u.) | $\Delta\Delta G^\ddagger$ (kcal/mol) |       |                 | TS 2nd                | orientation I |      | Orientation II |      | $\Delta\Delta G^\ddagger$ (a.u.) | $\Delta\Delta G^\ddagger$ (kcal/mol) |       |
|---------------|---------------|------|----------------|------|----------------------------------|--------------------------------------|-------|-----------------|-----------------------|---------------|------|----------------|------|----------------------------------|--------------------------------------|-------|
| <i>R-anti</i> | -3.0          | up   | 23.0           | up   | -3121.122551                     | 2.01                                 | -0.02 | <i>R,R-Int.</i> | <i>R-re</i><br>(CO-O) | -9.4          | up   | 10.8           | up   | -3121.122518                     | 2.03                                 | 0.00  |
|               | -5.8          | up   | 148.2          | down | -3121.125271                     | 0.30                                 | -1.73 |                 |                       | -8.6          | up   | -175.0         | down | -3121.121986                     | 2.36                                 | 0.33  |
|               | -179.4        | down | 15.7           | up   | -3121.124951                     | 0.50                                 | -1.53 |                 |                       | 177.9         | down | 11.8           | up   | -3121.119926                     | 3.65                                 | 1.63  |
|               | -179.1        | down | 170.2          | down | -3121.125747                     | 0.00                                 | -2.03 |                 |                       | 178.5         | down | -175.9         | down | -3121.121201                     | 2.85                                 | 0.83  |
| <i>R-syn</i>  | -7.3          | up   | -1.1           | up   | -3121.109942                     | 9.92                                 | 7.89  | <i>R,S-Int.</i> | <i>R-re</i><br>(CO-C) | -3.5          | up   | 6.3            | up   | -3121.116296                     | 5.93                                 | 3.90  |
|               | -7.0          | up   | -179.3         | down | -3121.109217                     | 10.37                                | 8.35  |                 |                       | -2.7          | up   | -178.5         | down | -3121.115067                     | 6.70                                 | 4.68  |
|               | -175.4        | down | -1.8           | up   | -3121.109650                     | 10.10                                | 8.08  |                 |                       | -178.3        | down | 4.8            | up   | -3121.116093                     | 6.06                                 | 4.03  |
|               | -175.1        | down | -179.4         | down | -3121.109103                     | 10.44                                | 8.42  |                 |                       | 178.4         | down | -179.4         | down | -3121.114932                     | 6.79                                 | 4.76  |
| <i>S-anti</i> | -14.1         | up   | 26.5           | up   | -3121.119369                     | 4.00                                 | 1.98  | <i>S,S-Int.</i> | <i>S-si</i><br>(CO-O) | -3.7          | up   | 9.6            | up   | -3121.121638                     | 2.58                                 | 0.55  |
|               | -16.8         | up   | 154.6          | down | -3121.118986                     | 4.24                                 | 2.22  |                 |                       | -4.2          | up   | -179.3         | down | -3121.120753                     | 3.13                                 | 1.11  |
|               | -177.1        | down | 90.4           | up   | -3121.110928                     | 9.30                                 | 7.27  |                 |                       | 178.9         | down | 10.9           | up   | -3121.120044                     | 3.58                                 | 1.55  |
|               | -176.8        | down | 158.7          | down | -3121.119162                     | 4.13                                 | 2.11  |                 |                       | -179.1        | down | 176.9          | down | -3121.119879                     | 3.68                                 | 1.66  |
| <i>S-syn</i>  | 0.5           | up   | 6.1            | up   | -3121.119489                     | 3.93                                 | 1.90  | <i>S,S-Int.</i> | <i>S-si</i><br>(CO-C) | -6.5          | up   | 4.9            | up   | -3121.111179                     | 9.14                                 | 7.12  |
|               | 1.3           | up   | 177.4          | down | -3121.119101                     | 4.17                                 | 2.14  |                 |                       | -5.9          | up   | 176.4          | down | -3121.111472                     | 8.96                                 | 6.93  |
|               | 179.6         | down | 5.5            | up   | -3121.119592                     | 3.86                                 | 1.84  |                 |                       | -176.2        | down | -5.8           | up   | -3121.109908                     | 9.94                                 | 7.91  |
|               | 180.0         | down | 178.5          | down | -3121.120428                     | 3.34                                 | 1.31  |                 |                       | 174.9         | down | 175.0          | down | -3121.110365                     | 9.65                                 | 7.63  |
| <i>R-anti</i> | 0.5           | up   | 6.1            | up   | -3121.119489                     | 3.93                                 | 1.90  | <i>S,R-Int.</i> | <i>S-re</i><br>(CO-O) | -9.4          | up   | 11.0           | up   | -3121.123110                     | 1.65                                 | -0.37 |
|               | 1.3           | up   | 177.4          | down | -3121.119101                     | 4.17                                 | 2.14  |                 |                       | -10.3         | up   | -175.3         | down | -3121.122797                     | 1.85                                 | -0.18 |
|               | 179.6         | down | 5.5            | up   | -3121.119592                     | 3.86                                 | 1.84  |                 |                       | -178.9        | down | 10.2           | up   | -3121.122226                     | 2.21                                 | 0.18  |
|               | 180.0         | down | 178.5          | down | -3121.120428                     | 3.34                                 | 1.31  |                 |                       | 177.8         | down | -176.8         | down | -3121.121452                     | 2.70                                 | 0.67  |
| <i>R-syn</i>  | 0.5           | up   | 6.1            | up   | -3121.119489                     | 3.93                                 | 1.90  | <i>S,S-Int.</i> | <i>S-re</i><br>(CO-C) | -5.2          | up   | -0.8           | up   | -3121.113849                     | 7.47                                 | 5.44  |
|               | 1.3           | up   | 177.4          | down | -3121.119101                     | 4.17                                 | 2.14  |                 |                       | -2.9          | up   | 168.7          | down | -3121.112511                     | 8.31                                 | 6.28  |
|               | 179.6         | down | 5.5            | up   | -3121.119592                     | 3.86                                 | 1.84  |                 |                       | -178.0        | down | -1.5           | up   | -3121.110893                     | 9.32                                 | 7.30  |
|               | 180.0         | down | 178.5          | down | -3121.120428                     | 3.34                                 | 1.31  |                 |                       | -178.3        | down | 167.6          | down | -3121.111975                     | 8.64                                 | 6.62  |

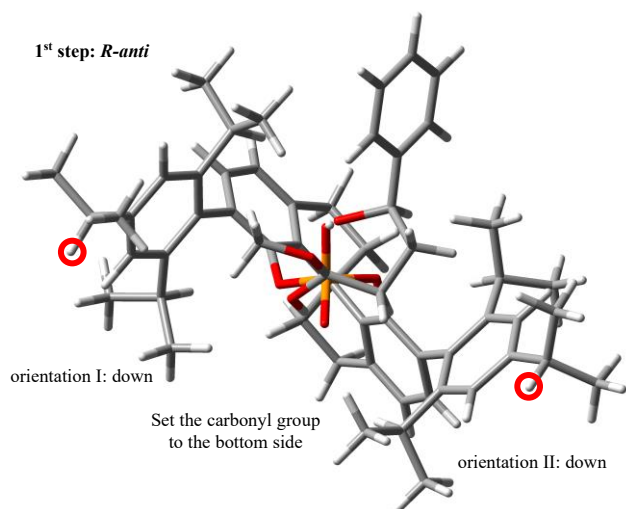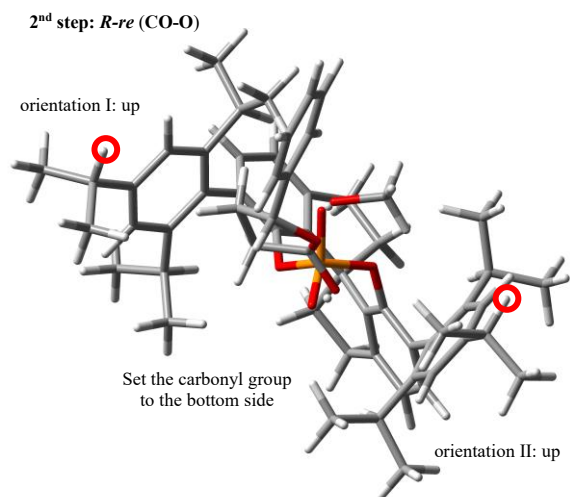

DFT calculation of real system using SPINOL-derive CPA (S)-1ba

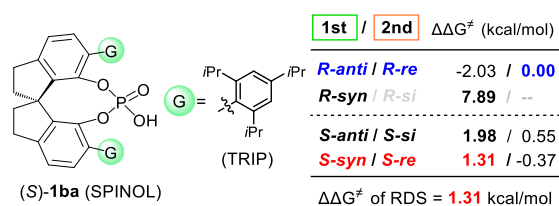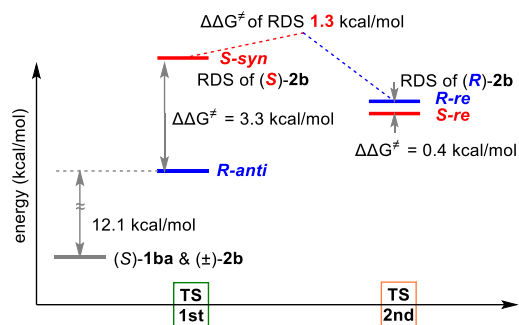

TS-1st-(R)-reaction pathway: *R-anti*/(S)-1ba (SPINOL-TRIP)

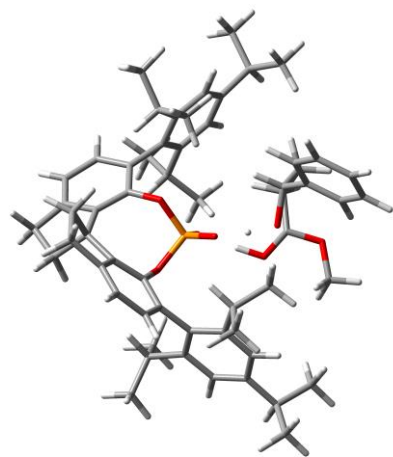

B3LYP/6-31G(d); E(B3LYP) = -3122.217549 hartree

Zero-point Energy Correction = 1.194953 hartree

Thermal Correction to Energy = 1.260650 hartree

Thermal correction to Enthalpy = 1.091802 hartree

Thermal correction to Gibbs Free Energy = 1.091012 hartree

Sum of electronic and Zero-point Energies = -3121.022596 hartree

Sum of electronic and thermal Energies = -3120.956899 hartree

Sum of electronic and thermal Enthalpies = -3120.955955 hartree

Sum of electronic and thermal Free Energies = -3121.125747 hartree

The number of Imaginary frequencies = 1

| Center Number | Atomic Number | Atomic Type | Coordinates (Angstroms) |          |           |
|---------------|---------------|-------------|-------------------------|----------|-----------|
|               |               |             | X                       | Y        | Z         |
| 1             | 6             | 0           | -0.075361               | 2.971503 | -1.713550 |
| 2             | 8             | 0           | 0.275983                | 2.772905 | -0.055046 |
| 3             | 6             | 0           | -0.869642               | 3.219641 | 0.732853  |
| 4             | 6             | 0           | -1.860520               | 3.804502 | -0.295587 |
| 5             | 6             | 0           | -1.588229               | 3.030418 | -1.585037 |
| 6             | 1             | 0           | -1.302774               | 2.321146 | 1.185012  |
| 7             | 1             | 0           | -1.671797               | 4.871763 | -0.443421 |
| 8             | 1             | 0           | -2.888333               | 3.685243 | 0.055159  |

|    |    |   |           |           |           |
|----|----|---|-----------|-----------|-----------|
| 9  | 1  | 0 | -2.005166 | 3.514883  | -2.472443 |
| 10 | 1  | 0 | -1.975784 | 2.008974  | -1.529317 |
| 11 | 8  | 0 | 0.526656  | 1.977270  | -2.347122 |
| 12 | 8  | 0 | 0.438403  | 4.184717  | -2.004951 |
| 13 | 6  | 0 | 1.855906  | 4.239478  | -2.250017 |
| 14 | 1  | 0 | 2.089270  | 5.300735  | -2.344774 |
| 15 | 1  | 0 | 2.106531  | 3.711580  | -3.172293 |
| 16 | 1  | 0 | 2.405965  | 3.802353  | -1.412598 |
| 17 | 1  | 0 | 0.485085  | 1.684610  | 0.227790  |
| 18 | 1  | 0 | 0.116357  | 1.073551  | -2.125390 |
| 19 | 6  | 0 | -1.208649 | -3.707676 | 0.500576  |
| 20 | 6  | 0 | -1.787832 | -2.458203 | 0.280384  |
| 21 | 6  | 0 | -3.671285 | -3.515623 | -0.776618 |
| 22 | 6  | 0 | -3.061149 | -4.763743 | -0.659719 |
| 23 | 6  | 0 | -1.826116 | -4.852058 | -0.029092 |
| 24 | 1  | 0 | -4.652111 | -3.439032 | -1.235451 |
| 25 | 1  | 0 | -3.550418 | -5.651014 | -1.053937 |
| 26 | 6  | 0 | -0.965405 | -6.076127 | 0.191923  |
| 27 | 1  | 0 | -1.372555 | -6.713277 | 0.989747  |
| 28 | 1  | 0 | -0.891299 | -6.703626 | -0.703722 |
| 29 | 6  | 0 | 0.009974  | -4.119266 | 1.322932  |
| 30 | 6  | 0 | 0.387428  | -5.457732 | 0.600537  |
| 31 | 1  | 0 | 0.971194  | -5.219965 | -0.296087 |
| 32 | 1  | 0 | 0.995891  | -6.114549 | 1.229637  |
| 33 | 6  | 0 | -0.372889 | -4.423895 | 2.809855  |
| 34 | 1  | 0 | -0.930606 | -3.570176 | 3.211704  |
| 35 | 1  | 0 | -1.005772 | -5.311667 | 2.906365  |
| 36 | 6  | 0 | 0.982910  | -4.555059 | 3.539279  |
| 37 | 1  | 0 | 1.349279  | -5.591202 | 3.521057  |
| 38 | 1  | 0 | 0.924442  | -4.262501 | 4.594104  |
| 39 | 6  | 0 | 1.878323  | -3.636312 | 2.735551  |
| 40 | 6  | 0 | 1.251554  | -3.259379 | 1.537834  |
| 41 | 6  | 0 | 3.152228  | -3.171586 | 3.040404  |
| 42 | 1  | 0 | 3.654028  | -3.478607 | 3.954798  |
| 43 | 6  | 0 | 1.853289  | -2.299136 | 0.727379  |
| 44 | 6  | 0 | 3.789739  | -2.311128 | 2.146195  |
| 45 | 1  | 0 | 4.802818  | -1.981381 | 2.351607  |
| 46 | 8  | 0 | -1.119007 | -1.317193 | 0.725971  |
| 47 | 8  | 0 | 1.158567  | -1.826088 | -0.388131 |
| 48 | 15 | 0 | 0.047656  | -0.643702 | -0.205797 |
| 49 | 8  | 0 | 0.604202  | 0.483955  | 0.664171  |
| 50 | 8  | 0 | -0.452698 | -0.293464 | -1.582371 |
| 51 | 6  | 0 | -3.046699 | -2.334685 | -0.341594 |
| 52 | 6  | 0 | 3.154322  | -1.825567 | 0.991105  |
| 53 | 6  | 0 | -0.440146 | 4.174494  | 1.822145  |
| 54 | 6  | 0 | -0.806718 | 3.931171  | 3.149245  |
| 55 | 6  | 0 | 0.305337  | 5.322540  | 1.520360  |
| 56 | 6  | 0 | -0.445780 | 4.823782  | 4.161168  |
| 57 | 1  | 0 | -1.374864 | 3.036454  | 3.393454  |
| 58 | 6  | 0 | 0.673300  | 6.209426  | 2.529897  |
| 59 | 1  | 0 | 0.600433  | 5.511021  | 0.491847  |
| 60 | 6  | 0 | 0.296028  | 5.963866  | 3.853419  |
| 61 | 1  | 0 | -0.738144 | 4.622475  | 5.188274  |
| 62 | 1  | 0 | 1.255680  | 7.094083  | 2.285765  |
| 63 | 1  | 0 | 0.583073  | 6.657286  | 4.639431  |
| 64 | 6  | 0 | 3.886687  | -0.878805 | 0.084164  |
| 65 | 6  | 0 | 4.300000  | 0.396407  | 0.554468  |
| 66 | 6  | 0 | 4.252286  | -1.288566 | -1.222008 |
| 67 | 6  | 0 | 5.065442  | 1.213213  | -0.284811 |
| 68 | 6  | 0 | 5.010929  | -0.423075 | -2.019092 |
| 69 | 6  | 0 | 5.435856  | 0.827644  | -1.575174 |
| 70 | 1  | 0 | 5.385540  | 2.183009  | 0.087866  |
| 71 | 1  | 0 | 5.294108  | -0.743599 | -3.019384 |



|     |   |   |           |           |           |     |   |   |          |          |           |
|-----|---|---|-----------|-----------|-----------|-----|---|---|----------|----------|-----------|
| 72  | 6 | 0 | -3.768842 | -1.029717 | -0.524813 | 135 | 1 | 0 | 8.312645 | 2.543376 | -2.550568 |
| 73  | 6 | 0 | -4.308475 | -0.354405 | 0.598903  | 136 | 1 | 0 | 7.638445 | 2.479518 | -0.913656 |
| 74  | 6 | 0 | -4.025861 | -0.531133 | -1.827297 | 137 | 1 | 0 | 4.619606 | 2.904800 | -3.233817 |
| 75  | 6 | 0 | -5.101635 | 0.781757  | 0.398002  | 138 | 1 | 0 | 5.454905 | 3.653788 | -1.860916 |
| 76  | 6 | 0 | -4.829225 | 0.607941  | -1.967035 | 139 | 1 | 0 | 6.209011 | 3.663090 | -3.462614 |
| 77  | 6 | 0 | -5.393227 | 1.273434  | -0.877030 |     |   |   |          |          |           |
| 78  | 1 | 0 | -5.532864 | 1.273230  | 1.266738  |     |   |   |          |          |           |
| 79  | 1 | 0 | -5.044282 | 0.977223  | -2.967475 |     |   |   |          |          |           |
| 80  | 6 | 0 | -3.503098 | -1.205153 | -3.098726 |     |   |   |          |          |           |
| 81  | 6 | 0 | -2.725347 | -0.238377 | -4.011522 |     |   |   |          |          |           |
| 82  | 6 | 0 | -4.650585 | -1.867901 | -3.889321 |     |   |   |          |          |           |
| 83  | 1 | 0 | -2.802270 | -1.989282 | -2.801765 |     |   |   |          |          |           |
| 84  | 1 | 0 | -1.871286 | 0.189441  | -3.483371 |     |   |   |          |          |           |
| 85  | 1 | 0 | -2.344462 | -0.779748 | -4.886041 |     |   |   |          |          |           |
| 86  | 1 | 0 | -3.358732 | 0.576212  | -4.383856 |     |   |   |          |          |           |
| 87  | 1 | 0 | -5.198831 | -2.596898 | -3.283143 |     |   |   |          |          |           |
| 88  | 1 | 0 | -5.373309 | -1.120666 | -4.239024 |     |   |   |          |          |           |
| 89  | 1 | 0 | -4.256850 | -2.389044 | -4.770364 |     |   |   |          |          |           |
| 90  | 6 | 0 | -4.119920 | -0.855247 | 2.031950  |     |   |   |          |          |           |
| 91  | 6 | 0 | -5.464766 | -1.255353 | 2.671308  |     |   |   |          |          |           |
| 92  | 6 | 0 | -3.370834 | 0.165879  | 2.909304  |     |   |   |          |          |           |
| 93  | 1 | 0 | -3.506514 | -1.758661 | 1.999949  |     |   |   |          |          |           |
| 94  | 1 | 0 | -5.981795 | -2.007809 | 2.065544  |     |   |   |          |          |           |
| 95  | 1 | 0 | -5.302245 | -1.676269 | 3.671022  |     |   |   |          |          |           |
| 96  | 1 | 0 | -6.135775 | -0.395141 | 2.778898  |     |   |   |          |          |           |
| 97  | 1 | 0 | -2.378539 | 0.375500  | 2.497103  |     |   |   |          |          |           |
| 98  | 1 | 0 | -3.922793 | 1.110504  | 2.990993  |     |   |   |          |          |           |
| 99  | 1 | 0 | -3.238118 | -0.227836 | 3.924567  |     |   |   |          |          |           |
| 100 | 6 | 0 | -6.362789 | 2.429162  | -1.098388 |     |   |   |          |          |           |
| 101 | 6 | 0 | -6.053301 | 3.670843  | -0.245358 |     |   |   |          |          |           |
| 102 | 6 | 0 | -7.817407 | 1.966746  | -0.874314 |     |   |   |          |          |           |
| 103 | 1 | 0 | -6.273815 | 2.725509  | -2.152838 |     |   |   |          |          |           |
| 104 | 1 | 0 | -5.043896 | 4.048535  | -0.440233 |     |   |   |          |          |           |
| 105 | 1 | 0 | -6.762220 | 4.476349  | -0.470756 |     |   |   |          |          |           |
| 106 | 1 | 0 | -6.131976 | 3.457104  | 0.827025  |     |   |   |          |          |           |
| 107 | 1 | 0 | -8.061518 | 1.109127  | -1.510342 |     |   |   |          |          |           |
| 108 | 1 | 0 | -7.976518 | 1.664924  | 0.167907  |     |   |   |          |          |           |
| 109 | 1 | 0 | -8.522600 | 2.775333  | -1.102543 |     |   |   |          |          |           |
| 110 | 6 | 0 | 3.965336  | 0.921767  | 1.953506  |     |   |   |          |          |           |
| 111 | 6 | 0 | 3.336985  | 2.327958  | 1.927228  |     |   |   |          |          |           |
| 112 | 6 | 0 | 5.210895  | 0.931346  | 2.864524  |     |   |   |          |          |           |
| 113 | 1 | 0 | 3.224704  | 0.252499  | 2.398702  |     |   |   |          |          |           |
| 114 | 1 | 0 | 2.464514  | 2.364601  | 1.272524  |     |   |   |          |          |           |
| 115 | 1 | 0 | 3.013773  | 2.613436  | 2.935377  |     |   |   |          |          |           |
| 116 | 1 | 0 | 4.051230  | 3.088853  | 1.589293  |     |   |   |          |          |           |
| 117 | 1 | 0 | 5.666280  | -0.060418 | 2.954214  |     |   |   |          |          |           |
| 118 | 1 | 0 | 5.978283  | 1.609965  | 2.472427  |     |   |   |          |          |           |
| 119 | 1 | 0 | 4.946161  | 1.273683  | 3.872496  |     |   |   |          |          |           |
| 120 | 6 | 0 | 3.908900  | -2.663887 | -1.796325 |     |   |   |          |          |           |
| 121 | 6 | 0 | 5.181890  | -3.500933 | -2.035990 |     |   |   |          |          |           |
| 122 | 6 | 0 | 3.062024  | -2.560595 | -3.079040 |     |   |   |          |          |           |
| 123 | 1 | 0 | 3.312270  | -3.206884 | -1.059979 |     |   |   |          |          |           |
| 124 | 1 | 0 | 5.763218  | -3.611750 | -1.113599 |     |   |   |          |          |           |
| 125 | 1 | 0 | 4.918780  | -4.503715 | -2.394698 |     |   |   |          |          |           |
| 126 | 1 | 0 | 5.833720  | -3.039773 | -2.787359 |     |   |   |          |          |           |
| 127 | 1 | 0 | 2.143100  | -1.996183 | -2.897017 |     |   |   |          |          |           |
| 128 | 1 | 0 | 3.613692  | -2.067518 | -3.888497 |     |   |   |          |          |           |
| 129 | 1 | 0 | 2.785423  | -3.561814 | -3.432360 |     |   |   |          |          |           |
| 130 | 6 | 0 | 6.289633  | 1.721313  | -2.465468 |     |   |   |          |          |           |
| 131 | 6 | 0 | 7.692898  | 1.946366  | -1.870378 |     |   |   |          |          |           |
| 132 | 6 | 0 | 5.601233  | 3.063689  | -2.773822 |     |   |   |          |          |           |
| 133 | 1 | 0 | 6.419517  | 1.193720  | -3.420471 |     |   |   |          |          |           |
| 134 | 1 | 0 | 8.202577  | 0.993438  | -1.691127 |     |   |   |          |          |           |

TS-2nd-(R)-reaction pathway: R-re/(S)-1ba (SPINOL-TRIP)

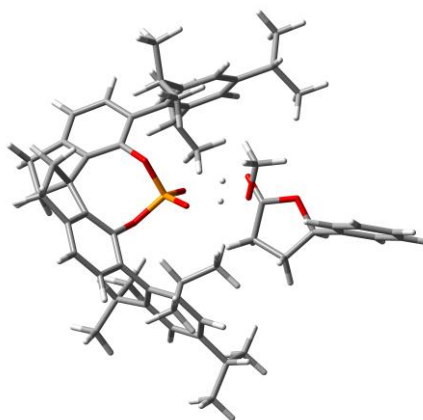

B3LYP/6-31G(d); E(B3LYP) = -3122.215732 hartree

Zero-point Energy Correction = 1.195785 hartree

Thermal Correction to Energy = 1.261492 hartree

Thermal correction to Enthalpy = 1.262436 hartree

Thermal correction to Gibbs Free Energy = 1.093214 hartree

Sum of electronic and Zero-point Energies = -3121.019947 hartree

Sum of electronic and thermal Energies = -3120.954240 hartree

Sum of electronic and thermal Enthalpies = -3120.953296 hartree

Sum of electronic and thermal Free Energies = -3121.122518 hartree

The number of Imaginary frequencies = 1

| Center Number | Atomic Number | Atomic Type | Coordinates (Angstroms) |           |           |
|---------------|---------------|-------------|-------------------------|-----------|-----------|
|               |               |             | X                       | Y         | Z         |
| 1             | 6             | 0           | -1.971144               | 2.134754  | 0.594053  |
| 2             | 8             | 0           | -2.829305               | 3.175894  | 0.497221  |
| 3             | 8             | 0           | -1.759848               | 1.648496  | -1.033535 |
| 4             | 6             | 0           | -4.212395               | 2.742459  | 0.732699  |
| 5             | 6             | 0           | -4.145182               | 1.201893  | 0.753501  |
| 6             | 6             | 0           | -2.697610               | 0.926124  | 1.170938  |
| 7             | 1             | 0           | -4.466509               | 3.122513  | 1.728924  |
| 8             | 1             | 0           | -4.341502               | 0.793444  | -0.240879 |
| 9             | 1             | 0           | -4.882753               | 0.782162  | 1.442487  |
| 10            | 1             | 0           | -2.299470               | -0.025289 | 0.817916  |
| 11            | 1             | 0           | -2.568378               | 0.969355  | 2.258356  |
| 12            | 8             | 0           | -0.782569               | 2.514362  | 1.023470  |
| 13            | 6             | 0           | -1.154658               | 2.671264  | -1.855122 |
| 14            | 1             | 0           | -1.846185               | 3.512911  | -1.905408 |
| 15            | 1             | 0           | -1.007223               | 2.239894  | -2.847412 |
| 16            | 1             | 0           | -0.197920               | 2.989660  | -1.433406 |
| 17            | 1             | 0           | -1.105069               | 0.761979  | -1.046094 |
| 18            | 1             | 0           | -0.179507               | 1.704638  | 1.152399  |
| 19            | 6             | 0           | 4.002628                | -1.539170 | -0.101787 |
| 20            | 6             | 0           | 3.392661                | -0.288063 | -0.167961 |
| 21            | 6             | 0           | 5.247824                | 0.686114  | 1.011960  |
| 22            | 6             | 0           | 5.830701                | -0.571617 | 1.168683  |
| 23            | 6             | 0           | 5.194868                | -1.681952 | 0.625713  |
| 24            | 1             | 0           | 5.745439                | 1.562360  | 1.416468  |
| 25            | 1             | 0           | 6.765748                | -0.676469 | 1.713548  |
| 26            | 6             | 0           | 5.597736                | -3.138050 | 0.708863  |
| 27            | 1             | 0           | 6.443016                | -3.360687 | 0.042378  |
| 28            | 1             | 0           | 5.909445                | -3.429036 | 1.718636  |

|    |    |   |           |           |           |     |   |   |           |           |           |
|----|----|---|-----------|-----------|-----------|-----|---|---|-----------|-----------|-----------|
| 29 | 6  | 0 | 3.640688  | -2.868131 | -0.759125 | 98  | 1 | 0 | 2.187227  | 3.067480  | -3.598900 |
| 30 | 6  | 0 | 4.313602  | -3.860960 | 0.249846  | 99  | 1 | 0 | 3.032462  | 1.641832  | -4.212268 |
| 31 | 1  | 0 | 3.642240  | -4.000493 | 1.104902  | 100 | 6 | 0 | 1.513937  | 6.154686  | 0.100010  |
| 32 | 1  | 0 | 4.500615  | -4.844673 | -0.191772 | 101 | 6 | 0 | 2.470534  | 7.256768  | 0.596382  |
| 33 | 6  | 0 | 4.317800  | -3.021300 | -2.161976 | 102 | 6 | 0 | 0.167775  | 6.219206  | 0.845134  |
| 34 | 1  | 0 | 4.081808  | -2.136538 | -2.764292 | 103 | 1 | 0 | 1.313038  | 6.350071  | -0.962959 |
| 35 | 1  | 0 | 5.407472  | -3.099511 | -2.095424 | 104 | 1 | 0 | 3.411314  | 7.248473  | 0.034810  |
| 36 | 6  | 0 | 3.649071  | -4.269569 | -2.778866 | 105 | 1 | 0 | 2.014247  | 8.248281  | 0.485850  |
| 37 | 1  | 0 | 4.191186  | -5.187779 | -2.512377 | 106 | 1 | 0 | 2.713820  | 7.115714  | 1.656381  |
| 38 | 1  | 0 | 3.614355  | -4.232891 | -3.873896 | 107 | 1 | 0 | -0.507804 | 5.417918  | 0.529579  |
| 39 | 6  | 0 | 2.268418  | -4.240223 | -2.158423 | 108 | 1 | 0 | 0.306526  | 6.120874  | 1.928278  |
| 40 | 6  | 0 | 2.221568  | -3.319210 | -1.099210 | 109 | 1 | 0 | -0.323760 | 7.182909  | 0.663906  |
| 41 | 6  | 0 | 1.140109  | -4.970424 | -2.512014 | 110 | 6 | 0 | -2.574721 | -2.797922 | -2.371416 |
| 42 | 1  | 0 | 1.179189  | -5.702295 | -3.315171 | 111 | 6 | 0 | -3.155474 | -1.414246 | -2.718056 |
| 43 | 6  | 0 | 0.993705  | -3.034441 | -0.503973 | 112 | 6 | 0 | -3.306885 | -3.886485 | -3.184158 |
| 44 | 6  | 0 | -0.050022 | -4.757198 | -1.815485 | 113 | 1 | 0 | -1.528410 | -2.787187 | -2.685891 |
| 45 | 1  | 0 | -0.925367 | -5.351903 | -2.056617 | 114 | 1 | 0 | -2.645075 | -0.624012 | -2.164142 |
| 46 | 8  | 0 | 2.167568  | -0.171478 | -0.822750 | 115 | 1 | 0 | -3.028279 | -1.215471 | -3.789375 |
| 47 | 8  | 0 | 0.916534  | -2.025435 | 0.455358  | 116 | 1 | 0 | -4.229362 | -1.353055 | -2.503259 |
| 48 | 15 | 0 | 0.771394  | -0.467636 | -0.017982 | 117 | 1 | 0 | -2.895675 | -4.884292 | -2.998859 |
| 49 | 8  | 0 | -0.304893 | -0.321820 | -1.090398 | 118 | 1 | 0 | -4.372942 | -3.918582 | -2.927792 |
| 50 | 8  | 0 | 0.632513  | 0.340456  | 1.244594  | 119 | 1 | 0 | -3.227614 | -3.682453 | -4.259083 |
| 51 | 6  | 0 | 4.006543  | 0.857960  | 0.378695  | 120 | 6 | 0 | -0.476191 | -4.386869 | 2.095740  |
| 52 | 6  | 0 | -0.166963 | -3.767605 | -0.826308 | 121 | 6 | 0 | -0.755482 | -5.834972 | 2.546234  |
| 53 | 6  | 0 | -5.141068 | 3.361522  | -0.283236 | 122 | 6 | 0 | -0.170140 | -3.477549 | 3.301232  |
| 54 | 6  | 0 | -6.165025 | 4.214954  | 0.139056  | 123 | 1 | 0 | 0.425979  | -4.419106 | 1.481129  |
| 55 | 6  | 0 | -5.007249 | 3.086359  | -1.651959 | 124 | 1 | 0 | -0.927158 | -6.491570 | 1.685761  |
| 56 | 6  | 0 | -7.048476 | 4.779891  | -0.783202 | 125 | 1 | 0 | 0.097323  | -6.230884 | 3.111270  |
| 57 | 1  | 0 | -6.271754 | 4.441261  | 1.197607  | 126 | 1 | 0 | -1.638949 | -5.894678 | 3.192904  |
| 58 | 6  | 0 | -5.882165 | 3.656176  | -2.574703 | 127 | 1 | 0 | 0.055463  | -2.458263 | 2.974999  |
| 59 | 1  | 0 | -4.214525 | 2.426027  | -1.992160 | 128 | 1 | 0 | -1.012865 | -3.437517 | 4.002226  |
| 60 | 6  | 0 | -6.907125 | 4.502683  | -2.142464 | 129 | 1 | 0 | 0.696959  | -3.860409 | 3.853408  |
| 61 | 1  | 0 | -7.840610 | 5.439195  | -0.438919 | 130 | 6 | 0 | -5.364759 | -3.148830 | 1.815699  |
| 62 | 1  | 0 | -5.766882 | 3.437847  | -3.633019 | 131 | 6 | 0 | -5.340824 | -2.270495 | 3.079452  |
| 63 | 1  | 0 | -7.590182 | 4.943608  | -2.863449 | 132 | 6 | 0 | -5.946227 | -4.541635 | 2.130149  |
| 64 | 6  | 0 | -1.483926 | -3.546103 | -0.139206 | 133 | 1 | 0 | -6.038821 | -2.668048 | 1.092942  |
| 65 | 6  | 0 | -2.616233 | -3.106756 | -0.872624 | 134 | 1 | 0 | -4.945825 | -1.271513 | 2.862634  |
| 66 | 6  | 0 | -1.622676 | -3.844844 | 1.241124  | 135 | 1 | 0 | -6.351416 | -2.156808 | 3.489662  |
| 67 | 6  | 0 | -3.842945 | -2.974311 | -0.208217 | 136 | 1 | 0 | -4.714229 | -2.710399 | 3.864000  |
| 68 | 6  | 0 | -2.872509 | -3.692677 | 1.849842  | 137 | 1 | 0 | -6.010215 | -5.156173 | 1.225621  |
| 69 | 6  | 0 | -3.999656 | -3.260136 | 1.148288  | 138 | 1 | 0 | -5.317137 | -5.076069 | 2.852002  |
| 70 | 1  | 0 | -4.713639 | -2.646179 | -0.772029 | 139 | 1 | 0 | -6.952500 | -4.457291 | 2.558671  |
| 71 | 1  | 0 | -2.968897 | -3.935943 | 2.905012  |     |   |   |           |           |           |
| 72 | 6  | 0 | 3.373553  | 2.216373  | 0.311313  |     |   |   |           |           |           |
| 73 | 6  | 0 | 3.206412  | 2.864323  | -0.936324 |     |   |   |           |           |           |
| 74 | 6  | 0 | 2.963167  | 2.874011  | 1.501474  |     |   |   |           |           |           |
| 75 | 6  | 0 | 2.597730  | 4.125314  | -0.970927 |     |   |   |           |           |           |
| 76 | 6  | 0 | 2.375226  | 4.139310  | 1.405546  |     |   |   |           |           |           |
| 77 | 6  | 0 | 2.163505  | 4.779587  | 0.182748  |     |   |   |           |           |           |
| 78 | 1  | 0 | 2.472543  | 4.623238  | -1.930772 |     |   |   |           |           |           |
| 79 | 1  | 0 | 2.059358  | 4.634102  | 2.319759  |     |   |   |           |           |           |
| 80 | 6  | 0 | 3.157048  | 2.278751  | 2.899347  |     |   |   |           |           |           |
| 81 | 6  | 0 | 1.857412  | 2.228962  | 3.725155  |     |   |   |           |           |           |
| 82 | 6  | 0 | 4.251175  | 3.044588  | 3.672474  |     |   |   |           |           |           |
| 83 | 1  | 0 | 3.493350  | 1.245303  | 2.786823  |     |   |   |           |           |           |
| 84 | 1  | 0 | 1.102060  | 1.625091  | 3.218779  |     |   |   |           |           |           |
| 85 | 1  | 0 | 2.058688  | 1.775247  | 4.703628  |     |   |   |           |           |           |
| 86 | 1  | 0 | 1.443985  | 3.228002  | 3.907134  |     |   |   |           |           |           |
| 87 | 1  | 0 | 5.199746  | 3.066453  | 3.124241  |     |   |   |           |           |           |
| 88 | 1  | 0 | 3.953582  | 4.084588  | 3.853901  |     |   |   |           |           |           |
| 89 | 1  | 0 | 4.433688  | 2.575014  | 4.646954  |     |   |   |           |           |           |
| 90 | 6  | 0 | 3.728233  | 2.276809  | -2.248433 |     |   |   |           |           |           |
| 91 | 6  | 0 | 4.892923  | 3.123582  | -2.801380 |     |   |   |           |           |           |
| 92 | 6  | 0 | 2.622150  | 2.103886  | -3.305827 |     |   |   |           |           |           |
| 93 | 1  | 0 | 4.131696  | 1.282570  | -2.041040 |     |   |   |           |           |           |
| 94 | 1  | 0 | 5.702550  | 3.209752  | -2.068044 |     |   |   |           |           |           |
| 95 | 1  | 0 | 5.304123  | 2.666428  | -3.709986 |     |   |   |           |           |           |
| 96 | 1  | 0 | 4.565883  | 4.138563  | -3.056818 |     |   |   |           |           |           |
| 97 | 1  | 0 | 1.821544  | 1.460059  | -2.930121 |     |   |   |           |           |           |

TS-1st-(R)-reaction pathway: R-syn/(S)-Iba (SPINOL-TRIP)

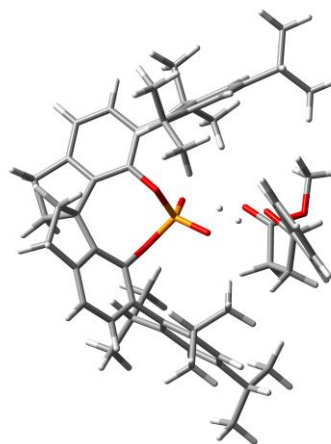

B3LYP/6-31G(d); E(B3LYP) = -3122.201932 hartree

Zero-point Energy Correction = 1.194156 hartree

Thermal Correction to Energy = 1.259923 hartree

Thermal correction to Enthalpy = 1.260867 hartree

Thermal correction to Gibbs Free Energy = 1.091990 hartree

|                                                                    |     |   |   |           |           |           |
|--------------------------------------------------------------------|-----|---|---|-----------|-----------|-----------|
| Sum of electronic and Zero-point Energies = -3121.007775 hartree   | 61  | 6 | 0 | -3.978272 | 1.886033  | -2.134257 |
| Sum of electronic and thermal Energies = -3120.942008 hartree      | 62  | 6 | 0 | -5.296600 | 2.558670  | -2.568668 |
| Sum of electronic and thermal Enthalpies = -3120.941064 hartree    | 63  | 6 | 0 | -3.151141 | 1.447293  | -3.357464 |
| Sum of electronic and thermal Free Energies = -3121.109942 hartree | 64  | 1 | 0 | -3.396729 | 2.646924  | -1.608839 |
| The number of Imaginary frequencies = 1                            | 65  | 1 | 0 | -5.869635 | 2.906012  | -1.701518 |
|                                                                    | 66  | 1 | 0 | -5.090612 | 3.424924  | -3.209263 |
|                                                                    | 67  | 1 | 0 | -5.934645 | 1.870587  | -3.135928 |
|                                                                    | 68  | 1 | 0 | -2.186660 | 1.030733  | -3.053343 |
|                                                                    | 69  | 1 | 0 | -3.680566 | 0.695926  | -3.955947 |
|                                                                    | 70  | 1 | 0 | -2.955882 | 2.307153  | -4.009867 |
|                                                                    | 71  | 6 | 0 | -6.197972 | -2.582465 | -1.325934 |
|                                                                    | 72  | 6 | 0 | -5.576433 | -3.298174 | -2.538379 |
|                                                                    | 73  | 6 | 0 | -7.629338 | -2.107810 | -1.646540 |
|                                                                    | 74  | 1 | 0 | -6.271488 | -3.317621 | -0.512420 |
|                                                                    | 75  | 1 | 0 | -4.582300 | -3.691742 | -2.300418 |
|                                                                    | 76  | 1 | 0 | -6.206451 | -4.137842 | -2.855693 |
|                                                                    | 77  | 1 | 0 | -5.471314 | -2.621756 | -3.394622 |
|                                                                    | 78  | 1 | 0 | -8.093340 | -1.635663 | -0.773832 |
|                                                                    | 79  | 1 | 0 | -7.628118 | -1.373727 | -2.461085 |
|                                                                    | 80  | 1 | 0 | -8.258974 | -2.951039 | -1.955755 |
|                                                                    | 81  | 6 | 0 | 4.063055  | 0.500141  | -2.815559 |
|                                                                    | 82  | 6 | 0 | 3.446537  | -0.619879 | -3.672717 |
|                                                                    | 83  | 6 | 0 | 5.383174  | 0.977458  | -3.456986 |
|                                                                    | 84  | 1 | 0 | 3.355683  | 1.333029  | -2.830994 |
|                                                                    | 85  | 1 | 0 | 2.526413  | -0.999696 | -3.226428 |
|                                                                    | 86  | 1 | 0 | 3.207319  | -0.234007 | -4.671090 |
|                                                                    | 87  | 1 | 0 | 4.139769  | -1.459537 | -3.809011 |
|                                                                    | 88  | 1 | 0 | 5.835970  | 1.808032  | -2.905258 |
|                                                                    | 89  | 1 | 0 | 6.119444  | 0.164801  | -3.486871 |
|                                                                    | 90  | 1 | 0 | 5.210340  | 1.310521  | -4.487743 |
|                                                                    | 91  | 6 | 0 | 3.830424  | 1.305162  | 2.294283  |
|                                                                    | 92  | 6 | 0 | 5.127297  | 1.807441  | 2.961072  |
|                                                                    | 93  | 6 | 0 | 2.938647  | 0.564189  | 3.307489  |
|                                                                    | 94  | 1 | 0 | 3.279904  | 2.191766  | 1.971739  |
|                                                                    | 95  | 1 | 0 | 5.741307  | 2.376046  | 2.253719  |
|                                                                    | 96  | 1 | 0 | 4.894026  | 2.460722  | 3.810985  |
|                                                                    | 97  | 1 | 0 | 5.735442  | 0.975783  | 3.336529  |
|                                                                    | 98  | 1 | 0 | 2.004793  | 0.236374  | 2.841674  |
|                                                                    | 99  | 1 | 0 | 3.446077  | -0.315649 | 3.722273  |
|                                                                    | 100 | 1 | 0 | 2.689248  | 1.223168  | 4.148370  |
|                                                                    | 101 | 6 | 0 | 5.935868  | -2.883693 | 0.446519  |
|                                                                    | 102 | 6 | 0 | 7.352139  | -2.900505 | -0.158553 |
|                                                                    | 103 | 6 | 0 | 5.109672  | -4.086289 | -0.048049 |
|                                                                    | 104 | 1 | 0 | 6.042802  | -2.986660 | 1.535236  |
|                                                                    | 105 | 1 | 0 | 7.953453  | -2.066683 | 0.219823  |
|                                                                    | 106 | 1 | 0 | 7.869160  | -3.835477 | 0.089582  |
|                                                                    | 107 | 1 | 0 | 7.319550  | -2.818846 | -1.251501 |
|                                                                    | 108 | 1 | 0 | 4.113879  | -4.094813 | 0.409014  |
|                                                                    | 109 | 1 | 0 | 4.980042  | -4.054861 | -1.136860 |
|                                                                    | 110 | 1 | 0 | 5.608747  | -5.030904 | 0.200577  |
|                                                                    | 111 | 6 | 0 | -0.118949 | -3.003375 | -2.006257 |
|                                                                    | 112 | 6 | 0 | -0.230469 | -3.845279 | 0.284935  |
|                                                                    | 113 | 6 | 0 | -1.594035 | -3.076922 | -1.625224 |
|                                                                    | 114 | 1 | 0 | -2.128752 | -3.611984 | -2.413998 |
|                                                                    | 115 | 1 | 0 | -1.989168 | -2.060253 | -1.574974 |
|                                                                    | 116 | 8 | 0 | 0.369908  | -2.030310 | -2.752041 |
|                                                                    | 117 | 8 | 0 | 0.326300  | -4.224558 | -2.384048 |
|                                                                    | 118 | 6 | 0 | 1.689995  | -4.299461 | -2.841888 |
|                                                                    | 119 | 1 | 0 | 1.895664  | -5.365366 | -2.949952 |
|                                                                    | 120 | 1 | 0 | 1.802081  | -3.790354 | -3.800939 |
|                                                                    | 121 | 1 | 0 | 2.365241  | -3.854519 | -2.106055 |
|                                                                    | 122 | 1 | 0 | 0.298679  | -1.077967 | -2.384750 |
|                                                                    | 123 | 6 | 0 | -0.025289 | -3.772620 | 1.782098  |
|                                                                    | 124 | 6 | 0 | -0.850331 | -4.535050 | 2.620807  |
|                                                                    | 125 | 6 | 0 | 1.024212  | -3.039431 | 2.348208  |
|                                                                    | 126 | 6 | 0 | -0.637347 | -4.557386 | 3.998640  |
|                                                                    | 127 | 1 | 0 | -1.664379 | -5.117842 | 2.196925  |
|                                                                    | 128 | 6 | 0 | 1.231099  | -3.057614 | 3.728971  |
|                                                                    | 129 | 1 | 0 | 1.675615  | -2.447852 | 1.713663  |

|     |   |   |           |           |           |
|-----|---|---|-----------|-----------|-----------|
| 130 | 6 | 0 | 0.404427  | -3.815284 | 4.558353  |
| 131 | 1 | 0 | -1.287913 | -5.152453 | 4.634171  |
| 132 | 1 | 0 | 2.042484  | -2.473273 | 4.153678  |
| 133 | 1 | 0 | 0.569196  | -3.828059 | 5.632404  |
| 134 | 1 | 0 | 0.224791  | -4.771552 | -0.077709 |
| 135 | 8 | 0 | 0.479851  | -2.795683 | -0.425406 |
| 136 | 1 | 0 | 0.109787  | -1.758674 | -0.044403 |
| 137 | 6 | 0 | -1.686952 | -3.773505 | -0.245842 |
| 138 | 1 | 0 | -2.317202 | -3.188672 | 0.427050  |
| 139 | 1 | 0 | -2.113417 | -4.777725 | -0.322779 |

TS-1st-(S)-reaction pathway: *S-anti*-(S)-1ba (SPINOL-TRIP)

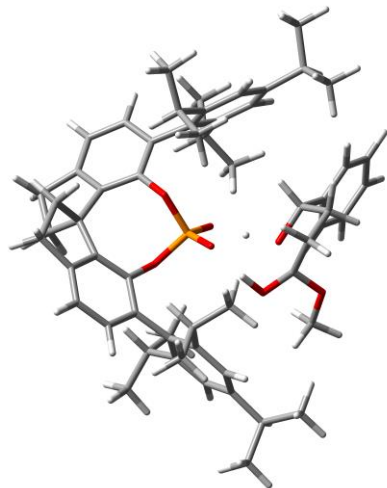

B3LYP/6-31G(d); E(B3LYP) = -3122.212139 hartree

Zero-point Energy Correction = 1.194935 hartree

Thermal Correction to Energy = 1.260562 hartree

Thermal correction to Enthalpy = 1.261506 hartree

Thermal correction to Gibbs Free Energy = 1.091990 hartree

Sum of electronic and Zero-point Energies = -3121.017204 hartree

Sum of electronic and thermal Energies = -3120.951577 hartree

Sum of electronic and thermal Enthalpies = -3120.950633 hartree

Sum of electronic and thermal Free Energies = -3121.119369 hartree

The number of Imaginary frequencies = 1

| Center Number | Atomic Number | Atomic Type | Coordinates (Angstroms) |           |           |
|---------------|---------------|-------------|-------------------------|-----------|-----------|
|               |               |             | X                       | Y         | Z         |
| 1             | 6             | 0           | -0.409583               | -3.201517 | 0.730268  |
| 2             | 8             | 0           | 0.743819                | -2.603347 | -0.380907 |
| 3             | 6             | 0           | 2.069232                | -2.875834 | 0.138532  |
| 4             | 6             | 0           | 1.852816                | -3.556378 | 1.518183  |
| 5             | 6             | 0           | 0.462982                | -3.113539 | 1.969077  |
| 6             | 1             | 0           | 2.555044                | -1.903223 | 0.279118  |
| 7             | 1             | 0           | 1.885603                | -4.643520 | 1.407436  |
| 8             | 1             | 0           | 2.631505                | -3.263048 | 2.227409  |
| 9             | 1             | 0           | 0.044746                | -3.752348 | 2.752178  |
| 10            | 1             | 0           | 0.458011                | -2.076250 | 2.316183  |
| 11            | 8             | 0           | -1.482821               | -2.441299 | 0.595611  |
| 12            | 8             | 0           | -0.593432               | -4.479173 | 0.346544  |
| 13            | 6             | 0           | -1.433104               | -4.692696 | -0.801791 |
| 14            | 1             | 0           | -1.411101               | -5.768917 | -0.976567 |
| 15            | 1             | 0           | -2.451621               | -4.353319 | -0.606915 |
| 16            | 1             | 0           | -1.029036               | -4.161231 | -1.667841 |
| 17            | 1             | 0           | 0.597665                | -1.479571 | -0.605859 |
| 18            | 1             | 0           | -1.328260               | -1.512882 | 0.969296  |
| 19            | 6             | 0           | -2.226825               | 3.433800  | -0.154348 |
| 20            | 6             | 0           | -2.493640               | 2.068760  | -0.260338 |
| 21            | 6             | 0           | -4.666291               | 2.425871  | 0.708194  |

|    |    |   |           |           |           |
|----|----|---|-----------|-----------|-----------|
| 22 | 6  | 0 | -4.379753 | 3.773599  | 0.913543  |
| 23 | 6  | 0 | -3.148486 | 4.266495  | 0.501229  |
| 24 | 1  | 0 | -5.631951 | 2.031625  | 1.008709  |
| 25 | 1  | 0 | -5.108295 | 4.421862  | 1.394263  |
| 26 | 6  | 0 | -2.589344 | 5.661940  | 0.667581  |
| 27 | 1  | 0 | -3.062888 | 6.372832  | -0.024085 |
| 28 | 1  | 0 | -2.747241 | 6.055522  | 1.678347  |
| 29 | 6  | 0 | -1.087616 | 4.285593  | -0.706614 |
| 30 | 6  | 0 | -1.097262 | 5.458557  | 0.332671  |
| 31 | 1  | 0 | -0.555351 | 5.137474  | 1.229692  |
| 32 | 1  | 0 | -0.608012 | 6.360452  | -0.047426 |
| 33 | 6  | 0 | -1.441226 | 4.854871  | -2.121724 |
| 34 | 1  | 0 | -1.734415 | 4.023270  | -2.772676 |
| 35 | 1  | 0 | -2.273381 | 5.564755  | -2.092208 |
| 36 | 6  | 0 | -0.121510 | 5.476714  | -2.624384 |
| 37 | 1  | 0 | -0.030582 | 6.528328  | -2.318605 |
| 38 | 1  | 0 | -0.034484 | 5.459854  | -3.716988 |
| 39 | 6  | 0 | 0.921396  | 4.609648  | -1.953557 |
| 40 | 6  | 0 | 0.337863  | 3.802629  | -0.962408 |
| 41 | 6  | 0 | 2.285442  | 4.546592  | -2.208486 |
| 42 | 1  | 0 | 2.744896  | 5.193677  | -2.951613 |
| 43 | 6  | 0 | 1.111321  | 2.818845  | -0.345315 |
| 44 | 8  | 0 | -1.527784 | 1.235111  | -0.831334 |
| 45 | 8  | 0 | 0.514880  | 1.949230  | 0.569922  |
| 46 | 15 | 0 | -0.323622 | 0.632365  | 0.098560  |
| 47 | 8  | 0 | 0.497162  | -0.231326 | -0.865064 |
| 48 | 8  | 0 | -0.830673 | -0.026543 | 1.355505  |
| 49 | 6  | 0 | -3.726921 | 1.532113  | 0.165408  |
| 50 | 6  | 0 | 2.497335  | 2.723635  | -0.586779 |
| 51 | 6  | 0 | 2.888211  | -3.722667 | -0.818579 |
| 52 | 6  | 0 | 2.372553  | -4.197480 | -2.027447 |
| 53 | 6  | 0 | 4.208293  | -4.046679 | -0.472919 |
| 54 | 6  | 0 | 3.158830  | -4.984230 | -2.872627 |
| 55 | 1  | 0 | 1.358466  | -3.939164 | -2.309960 |
| 56 | 6  | 0 | 4.993204  | -4.832256 | -1.316161 |
| 57 | 1  | 0 | 4.627435  | -3.681748 | 0.461950  |
| 58 | 6  | 0 | 4.469565  | -5.305681 | -2.521490 |
| 59 | 1  | 0 | 2.743165  | -5.342984 | -3.810752 |
| 60 | 1  | 0 | 6.014317  | -5.073299 | -1.032123 |
| 61 | 1  | 0 | 5.080065  | -5.916651 | -3.180899 |
| 62 | 6  | 0 | -4.096206 | 0.078794  | 0.092616  |
| 63 | 6  | 0 | -4.271735 | -0.564411 | -1.157164 |
| 64 | 6  | 0 | -4.384115 | -0.632085 | 1.288508  |
| 65 | 6  | 0 | -4.733588 | -1.885169 | -1.181275 |
| 66 | 6  | 0 | -4.859172 | -1.945354 | 1.199987  |
| 67 | 6  | 0 | -5.046670 | -2.594724 | -0.020551 |
| 68 | 1  | 0 | -4.876096 | -2.373117 | -2.143832 |
| 69 | 1  | 0 | -5.086396 | -2.473821 | 2.121340  |
| 70 | 6  | 0 | 3.061312  | 3.635559  | -1.494531 |
| 71 | 1  | 0 | 4.132596  | 3.593288  | -1.665391 |
| 72 | 6  | 0 | 3.384504  | 1.700930  | 0.058753  |
| 73 | 6  | 0 | 4.071415  | 0.756250  | -0.747710 |
| 74 | 6  | 0 | 3.611396  | 1.719384  | 1.458304  |
| 75 | 6  | 0 | 4.951499  | -0.143509 | -0.131846 |
| 76 | 6  | 0 | 4.507268  | 0.800754  | 2.015795  |
| 77 | 6  | 0 | 5.192663  | -0.139483 | 1.243377  |
| 78 | 1  | 0 | 5.480423  | -0.864867 | -0.750958 |
| 79 | 1  | 0 | 4.687565  | 0.838935  | 3.087053  |
| 80 | 6  | 0 | -4.038352 | 0.139683  | -2.494108 |
| 81 | 6  | 0 | -5.353171 | 0.281963  | -3.287019 |
| 82 | 6  | 0 | -2.955038 | -0.561012 | -3.335807 |
| 83 | 1  | 0 | -3.682318 | 1.152281  | -2.291233 |
| 84 | 1  | 0 | -6.111173 | 0.817669  | -2.704471 |
| 85 | 1  | 0 | -5.181683 | 0.839196  | -4.216198 |
| 86 | 1  | 0 | -5.770345 | -0.695279 | -3.557594 |
| 87 | 1  | 0 | -2.006665 | -0.608579 | -2.792910 |
| 88 | 1  | 0 | -3.251613 | -1.582547 | -3.603867 |
| 89 | 1  | 0 | -2.785449 | -0.011772 | -4.270180 |
| 90 | 6  | 0 | -4.215708 | -0.033239 | 2.689156  |

|     |   |   |           |           |           |
|-----|---|---|-----------|-----------|-----------|
| 91  | 6 | 0 | -3.258444 | -0.856553 | 3.573130  |
| 92  | 6 | 0 | -5.575902 | 0.138546  | 3.396349  |
| 93  | 1 | 0 | -3.768070 | 0.957782  | 2.586843  |
| 94  | 1 | 0 | -2.264515 | -0.904482 | 3.123569  |
| 95  | 1 | 0 | -3.161319 | -0.382690 | 4.557865  |
| 96  | 1 | 0 | -3.623478 | -1.877962 | 3.734274  |
| 97  | 1 | 0 | -6.268670 | 0.750299  | 2.808074  |
| 98  | 1 | 0 | -6.060256 | -0.829990 | 3.570295  |
| 99  | 1 | 0 | -5.442142 | 0.622607  | 4.371478  |
| 100 | 6 | 0 | -5.632234 | -3.992233 | -0.118932 |
| 101 | 6 | 0 | -7.172999 | -3.940947 | -0.177912 |
| 102 | 6 | 0 | -5.172251 | -4.946394 | 1.001753  |
| 103 | 1 | 0 | -5.286839 | -4.423440 | -1.072978 |
| 104 | 1 | 0 | -7.514121 | -3.313830 | -1.008642 |
| 105 | 1 | 0 | -7.599072 | -4.943617 | -0.307607 |
| 106 | 1 | 0 | -7.579450 | -3.517160 | 0.748444  |
| 107 | 1 | 0 | -4.080881 | -4.966367 | 1.093563  |
| 108 | 1 | 0 | -5.581598 | -4.649822 | 1.974539  |
| 109 | 1 | 0 | -5.518864 | -5.967282 | 0.802999  |
| 110 | 6 | 0 | 3.930147  | 0.687944  | -2.271807 |
| 111 | 6 | 0 | 3.435091  | -0.682132 | -2.766923 |
| 112 | 6 | 0 | 5.253395  | 1.067291  | -2.968665 |
| 113 | 1 | 0 | 3.177823  | 1.417117  | -2.578435 |
| 114 | 1 | 0 | 2.453518  | -0.910316 | -2.344839 |
| 115 | 1 | 0 | 3.338142  | -0.670495 | -3.859678 |
| 116 | 1 | 0 | 4.123840  | -1.493087 | -2.506683 |
| 117 | 1 | 0 | 5.608337  | 2.057259  | -2.659993 |
| 118 | 1 | 0 | 6.047705  | 0.347536  | -2.737258 |
| 119 | 1 | 0 | 5.122327  | 1.078555  | -4.057557 |
| 120 | 6 | 0 | 2.969474  | 2.747863  | 2.390332  |
| 121 | 6 | 0 | 4.030472  | 3.692927  | 2.989888  |
| 122 | 6 | 0 | 2.126839  | 2.084096  | 3.495951  |
| 123 | 1 | 0 | 2.292748  | 3.370483  | 1.800911  |
| 124 | 1 | 0 | 4.600351  | 4.199549  | 2.202742  |
| 125 | 1 | 0 | 3.551831  | 4.460169  | 3.610654  |
| 126 | 1 | 0 | 4.744170  | 3.151691  | 3.622293  |
| 127 | 1 | 0 | 1.348581  | 1.446413  | 3.066962  |
| 128 | 1 | 0 | 2.746146  | 1.473350  | 4.164406  |
| 129 | 1 | 0 | 1.638034  | 2.849751  | 4.110870  |
| 130 | 6 | 0 | 6.223612  | -1.083897 | 1.849930  |
| 131 | 6 | 0 | 5.706428  | -1.833536 | 3.090079  |
| 132 | 6 | 0 | 7.531984  | -0.334825 | 2.174845  |
| 133 | 1 | 0 | 6.459673  | -1.835735 | 1.083750  |
| 134 | 1 | 0 | 4.784816  | -2.384985 | 2.870366  |
| 135 | 1 | 0 | 6.454756  | -2.551373 | 3.446315  |
| 136 | 1 | 0 | 5.491314  | -1.146754 | 3.916730  |
| 137 | 1 | 0 | 7.934419  | 0.159963  | 1.284417  |
| 138 | 1 | 0 | 7.362860  | 0.435894  | 2.936382  |
| 139 | 1 | 0 | 8.293475  | -1.025720 | 2.557139  |

B3LYP/6-31G(d); E(B3LYP) = -3122.214009 hartree  
Zero-point Energy Correction = 1.195722 hartree  
Thermal Correction to Energy = 1.261463 hartree  
Thermal correction to Enthalpy = 1.262408 hartree  
Thermal correction to Gibbs Free Energy= 1.092371 hartree  
Sum of electronic and Zero-point Energies = -3121.018287 hartree  
Sum of electronic and thermal Energies = -3120.952546 hartree  
Sum of electronic and thermal Enthalpies = -3120.951602 hartree  
Sum of electronic and thermal Free Energies= -3121.121638 hartree  
The number of Imaginary frequencies = 1

| Center Number | Atomic Number | Atomic Type | Coordinates (Angstroms) |           |           |
|---------------|---------------|-------------|-------------------------|-----------|-----------|
|               |               |             | X                       | Y         | Z         |
| 1             | 6             | 0           | 1.031208                | 2.702585  | 0.875972  |
| 2             | 8             | 0           | 1.166714                | 4.036168  | 1.079361  |
| 3             | 8             | 0           | -0.387331               | 2.574926  | -0.024589 |
| 4             | 6             | 0           | 2.070603                | 4.629700  | 0.089496  |
| 5             | 6             | 0           | 2.302458                | 3.514181  | -0.949533 |
| 6             | 6             | 0           | 2.077384                | 2.240199  | -0.130777 |
| 7             | 1             | 0           | 3.000638                | 4.837528  | 0.631724  |
| 8             | 1             | 0           | 1.570462                | 3.589285  | -1.758196 |
| 9             | 1             | 0           | 3.301643                | 3.577442  | -1.388620 |
| 10            | 1             | 0           | 1.758094                | 1.379135  | -0.717711 |
| 11            | 1             | 0           | 2.969159                | 1.953403  | 0.436181  |
| 12            | 8             | 0           | 0.806011                | 2.061443  | 2.013940  |
| 13            | 6             | 0           | -1.560109               | 2.960975  | 0.729428  |
| 14            | 1             | 0           | -2.416845               | 2.868032  | 0.063031  |
| 15            | 1             | 0           | -1.687456               | 2.314757  | 1.600199  |
| 16            | 1             | 0           | -1.420616               | 3.995757  | 1.044229  |
| 17            | 1             | 0           | -0.489794               | 1.530411  | -0.361920 |
| 18            | 1             | 0           | 0.696229                | 1.065001  | 1.846297  |
| 19            | 6             | 0           | 0.542565                | -4.135794 | 0.073667  |
| 20            | 6             | 0           | 1.309202                | -2.979348 | -0.067199 |
| 21            | 6             | 0           | 3.152307                | -4.076504 | 1.018927  |
| 22            | 6             | 0           | 2.360956                | -5.193676 | 1.281589  |
| 23            | 6             | 0           | 1.051478                | -5.211912 | 0.818292  |
| 24            | 1             | 0           | 4.189701                | -4.070247 | 1.336515  |
| 25            | 1             | 0           | 2.769742                | -6.036060 | 1.834208  |
| 26            | 6             | 0           | -0.000825               | -6.284388 | 0.998108  |
| 27            | 1             | 0           | 0.212873                | -7.167257 | 0.379422  |
| 28            | 1             | 0           | -0.062903               | -6.636192 | 2.034442  |
| 29            | 6             | 0           | -0.796335               | -4.538749 | -0.538079 |
| 30            | 6             | 0           | -1.287535               | -5.568166 | 0.534658  |
| 31            | 1             | 0           | -1.729431               | -5.017433 | 1.372899  |
| 32            | 1             | 0           | -2.049002               | -6.250612 | 0.144564  |
| 33            | 6             | 0           | -0.577927               | -5.279810 | -1.901235 |
| 34            | 1             | 0           | 0.062057                | -4.659010 | -2.538729 |
| 35            | 1             | 0           | -0.084985               | -6.248654 | -1.776491 |
| 36            | 6             | 0           | -1.988425               | -5.380728 | -2.517336 |
| 37            | 1             | 0           | -2.503583               | -6.295733 | -2.192767 |
| 38            | 1             | 0           | -1.971981               | -5.402084 | -3.613171 |
| 39            | 6             | 0           | -2.666480               | -4.142328 | -1.974567 |
| 40            | 6             | 0           | -1.911637               | -3.575898 | -0.934757 |
| 41            | 6             | 0           | -3.864644               | -3.565104 | -2.376061 |
| 42            | 1             | 0           | -4.466363               | -4.016340 | -3.161175 |
| 43            | 6             | 0           | -2.301134               | -2.348745 | -0.397225 |
| 44            | 6             | 0           | -4.288646               | -2.393246 | -1.752621 |
| 45            | 1             | 0           | -5.238109               | -1.949695 | -2.036003 |
| 46            | 8             | 0           | 0.746051                | -1.864932 | -0.691403 |
| 47            | 8             | 0           | -1.503361               | -1.757161 | 0.580001  |
| 48            | 15            | 0           | -0.195115               | -0.852857 | 0.191244  |
| 49            | 8             | 0           | -0.570168               | 0.250607  | -0.795974 |
| 50            | 8             | 0           | 0.445537                | -0.460853 | 1.494498  |
| 51            | 6             | 0           | 2.645890                | -2.931773 | 0.380641  |
| 52            | 6             | 0           | -3.511264               | -1.735572 | -0.783607 |
| 53            | 6             | 0           | 1.502736                | 5.925484  | -0.436027 |
| 54            | 6             | 0           | 2.228611                | 7.112415  | -0.297548 |

TS-2nd-(S)-reaction pathway: S-si/(S)-1ba (SPINOL-TRIP)

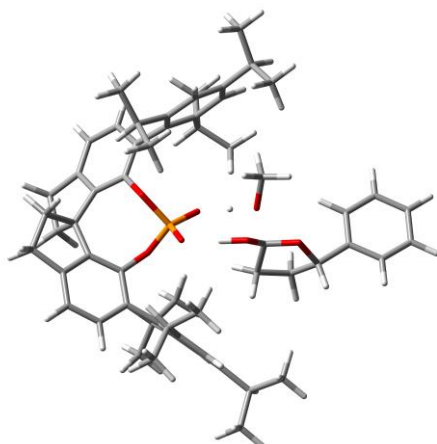

|     |   |   |           |           |           |     |   |   |           |           |           |
|-----|---|---|-----------|-----------|-----------|-----|---|---|-----------|-----------|-----------|
| 55  | 6 | 0 | 0.259548  | 5.960703  | -1.083844 | 124 | 1 | 0 | -1.943143 | 1.723808  | -2.319880 |
| 56  | 6 | 0 | 1.731414  | 8.315313  | -0.803619 | 125 | 1 | 0 | -2.595166 | 1.768901  | -3.964511 |
| 57  | 1 | 0 | 3.189742  | 7.096811  | 0.211551  | 126 | 1 | 0 | -3.302529 | 2.802727  | -2.717851 |
| 58  | 6 | 0 | -0.242298 | 7.161443  | -1.581525 | 127 | 1 | 0 | -5.780670 | -0.076054 | -3.275580 |
| 59  | 1 | 0 | -0.313479 | 5.044358  | -1.194092 | 128 | 1 | 0 | -5.632970 | 1.683758  | -3.328839 |
| 60  | 6 | 0 | 0.493558  | 8.342142  | -1.445081 | 129 | 1 | 0 | -4.785198 | 0.692378  | -4.525694 |
| 61  | 1 | 0 | 2.308466  | 9.229013  | -0.689877 | 130 | 6 | 0 | -5.923540 | 3.184930  | 1.291788  |
| 62  | 1 | 0 | -1.208407 | 7.177132  | -2.079002 | 131 | 6 | 0 | -5.150126 | 3.852772  | 2.443872  |
| 63  | 1 | 0 | 0.101335  | 9.277127  | -1.835990 | 132 | 6 | 0 | -7.381282 | 2.900207  | 1.702803  |
| 64  | 6 | 0 | 3.558566  | -1.754864 | 0.184713  | 133 | 1 | 0 | -5.952316 | 3.899487  | 0.457305  |
| 65  | 6 | 0 | 3.967242  | -1.377297 | -1.118446 | 134 | 1 | 0 | -4.126801 | 4.105921  | 2.144422  |
| 66  | 6 | 0 | 4.114117  | -1.086742 | 1.309684  | 135 | 1 | 0 | -5.648514 | 4.777434  | 2.758600  |
| 67  | 6 | 0 | 4.917611  | -0.358575 | -1.265309 | 136 | 1 | 0 | -5.087778 | 3.195239  | 3.318715  |
| 68  | 6 | 0 | 5.075414  | -0.090526 | 1.100723  | 137 | 1 | 0 | -7.947731 | 2.463432  | 0.873151  |
| 69  | 6 | 0 | 5.500149  | 0.288625  | -0.175630 | 138 | 1 | 0 | -7.425330 | 2.197138  | 2.542973  |
| 70  | 1 | 0 | 5.239091  | -0.081506 | -2.267267 | 139 | 1 | 0 | -7.884961 | 3.823883  | 2.012694  |
| 71  | 1 | 0 | 5.513520  | 0.395765  | 1.968587  |     |   |   |           |           |           |
| 72  | 6 | 0 | -4.021437 | -0.441637 | -0.218563 |     |   |   |           |           |           |
| 73  | 6 | 0 | -4.234776 | 0.668459  | -1.076630 |     |   |   |           |           |           |
| 74  | 6 | 0 | -4.403926 | -0.350545 | 1.144427  |     |   |   |           |           |           |
| 75  | 6 | 0 | -4.843345 | 1.818801  | -0.556481 |     |   |   |           |           |           |
| 76  | 6 | 0 | -4.989385 | 0.831657  | 1.611143  |     |   |   |           |           |           |
| 77  | 6 | 0 | -5.233055 | 1.927003  | 0.779143  |     |   |   |           |           |           |
| 78  | 1 | 0 | -5.025703 | 2.661744  | -1.220473 |     |   |   |           |           |           |
| 79  | 1 | 0 | -5.288217 | 0.884931  | 2.655237  |     |   |   |           |           |           |
| 80  | 6 | 0 | 6.600115  | 1.322741  | -0.383524 |     |   |   |           |           |           |
| 81  | 6 | 0 | 7.971870  | 0.763667  | 0.044639  |     |   |   |           |           |           |
| 82  | 6 | 0 | 6.313722  | 2.660324  | 0.321808  |     |   |   |           |           |           |
| 83  | 1 | 0 | 6.651528  | 1.525265  | -1.462382 |     |   |   |           |           |           |
| 84  | 1 | 0 | 8.202583  | -0.164965 | -0.488417 |     |   |   |           |           |           |
| 85  | 1 | 0 | 8.770396  | 1.486169  | -0.164164 |     |   |   |           |           |           |
| 86  | 1 | 0 | 7.989238  | 0.544154  | 1.118852  |     |   |   |           |           |           |
| 87  | 1 | 0 | 5.358818  | 3.086608  | -0.006863 |     |   |   |           |           |           |
| 88  | 1 | 0 | 6.269359  | 2.541679  | 1.410608  |     |   |   |           |           |           |
| 89  | 1 | 0 | 7.102866  | 3.389090  | 0.101563  |     |   |   |           |           |           |
| 90  | 6 | 0 | 3.468910  | -2.075881 | -2.384478 |     |   |   |           |           |           |
| 91  | 6 | 0 | 4.620771  | -2.792010 | -3.118148 |     |   |   |           |           |           |
| 92  | 6 | 0 | 2.727683  | -1.108722 | -3.326952 |     |   |   |           |           |           |
| 93  | 1 | 0 | 2.754562  | -2.848359 | -2.091575 |     |   |   |           |           |           |
| 94  | 1 | 0 | 5.125349  | -3.507933 | -2.459691 |     |   |   |           |           |           |
| 95  | 1 | 0 | 4.237096  | -3.340542 | -3.987052 |     |   |   |           |           |           |
| 96  | 1 | 0 | 5.374288  | -2.082504 | -3.479968 |     |   |   |           |           |           |
| 97  | 1 | 0 | 1.869402  | -0.653393 | -2.824210 |     |   |   |           |           |           |
| 98  | 1 | 0 | 3.386646  | -0.307866 | -3.684631 |     |   |   |           |           |           |
| 99  | 1 | 0 | 2.357312  | -1.647222 | -4.208015 |     |   |   |           |           |           |
| 100 | 6 | 0 | 3.727111  | -1.415740 | 2.754658  |     |   |   |           |           |           |
| 101 | 6 | 0 | 3.305250  | -0.167507 | 3.552955  |     |   |   |           |           |           |
| 102 | 6 | 0 | 4.869312  | -2.139989 | 3.497602  |     |   |   |           |           |           |
| 103 | 1 | 0 | 2.861518  | -2.082049 | 2.728644  |     |   |   |           |           |           |
| 104 | 1 | 0 | 2.509054  | 0.380545  | 3.047020  |     |   |   |           |           |           |
| 105 | 1 | 0 | 2.935166  | -0.465424 | 4.541197  |     |   |   |           |           |           |
| 106 | 1 | 0 | 4.145245  | 0.518971  | 3.714136  |     |   |   |           |           |           |
| 107 | 1 | 0 | 5.172677  | -3.062930 | 2.993089  |     |   |   |           |           |           |
| 108 | 1 | 0 | 5.757041  | -1.500273 | 3.574535  |     |   |   |           |           |           |
| 109 | 1 | 0 | 4.557309  | -2.399837 | 4.516474  |     |   |   |           |           |           |
| 110 | 6 | 0 | -4.264445 | -1.514553 | 2.126249  |     |   |   |           |           |           |
| 111 | 6 | 0 | -5.644527 | -2.008571 | 2.605219  |     |   |   |           |           |           |
| 112 | 6 | 0 | -3.356677 | -1.159382 | 3.319431  |     |   |   |           |           |           |
| 113 | 1 | 0 | -3.795214 | -2.350535 | 1.603517  |     |   |   |           |           |           |
| 114 | 1 | 0 | -6.278278 | -2.298154 | 1.759383  |     |   |   |           |           |           |
| 115 | 1 | 0 | -5.530861 | -2.881345 | 3.259759  |     |   |   |           |           |           |
| 116 | 1 | 0 | -6.177297 | -1.236041 | 3.172262  |     |   |   |           |           |           |
| 117 | 1 | 0 | -2.358771 | -0.865685 | 2.981054  |     |   |   |           |           |           |
| 118 | 1 | 0 | -3.776018 | -0.339957 | 3.915865  |     |   |   |           |           |           |
| 119 | 1 | 0 | -3.247794 | -2.026198 | 3.982626  |     |   |   |           |           |           |
| 120 | 6 | 0 | -3.843074 | 0.675644  | -2.557718 |     |   |   |           |           |           |
| 121 | 6 | 0 | -2.863381 | 1.814386  | -2.901829 |     |   |   |           |           |           |
| 122 | 6 | 0 | -5.083337 | 0.745628  | -3.471593 |     |   |   |           |           |           |
| 123 | 1 | 0 | -3.322022 | -0.259064 | -2.776218 |     |   |   |           |           |           |

TS-1st-(S)-reaction pathway: S-syn/(S)-1ba (SPINOL-TRIP)

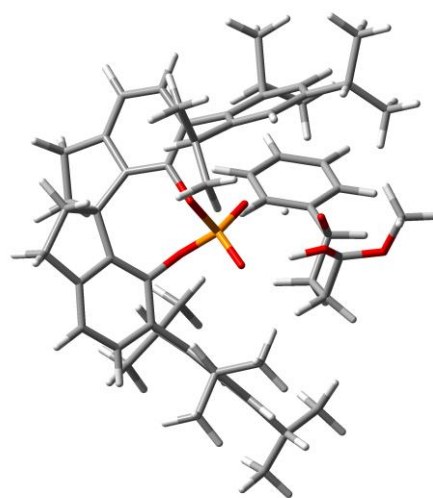

B3LYP/6-31G(d); E(B3LYP) = -3122.211215 hartree

Zero-point Energy Correction = 1.194562 hartree

Thermal Correction to Energy = 1.260494 hartree

Thermal correction to Enthalpy = 1.261439 hartree

Thermal correction to Gibbs Free Energy = 1.090787 hartree

Sum of electronic and Zero-point Energies = -3121.016654 hartree

Sum of electronic and thermal Energies = -3120.950721 hartree

Sum of electronic and thermal Enthalpies = -3120.949777 hartree

Sum of electronic and thermal Free Energies = -3121.120428 hartree

The number of Imaginary frequencies = 1

| Center Number | Atomic Number | Atomic Type | Coordinates (Angstroms) |          |          |
|---------------|---------------|-------------|-------------------------|----------|----------|
|               |               |             | X                       | Y        | Z        |
| 1             | 6             | 0           | -1.252509               | 3.125042 | 1.390299 |
| 2             | 6             | 0           | -1.861141               | 2.155282 | 0.597085 |
| 3             | 6             | 0           | -3.807999               | 2.228858 | 1.998049 |
| 4             | 6             | 0           | -3.161368               | 3.092726 | 2.882844 |
| 5             | 6             | 0           | -1.878549               | 3.532522 | 2.578109 |
| 6             | 1             | 0           | -4.829289               | 1.924297 | 2.200385 |
| 7             | 1             | 0           | -3.664941               | 3.424474 | 3.787611 |
| 8             | 6             | 0           | -0.974327               | 4.456982 | 3.366047 |
| 9             | 1             | 0           | -1.334930               | 5.494767 | 3.336151 |
| 10            | 1             | 0           | -0.913512               | 4.178125 | 4.424529 |
| 11            | 6             | 0           | -0.010693               | 3.978460 | 1.154974 |
| 12            | 6             | 0           | 0.379068                | 4.309006 | 2.633931 |
| 13            | 1             | 0           | 0.937024                | 3.461678 | 3.048880 |
| 14            | 1             | 0           | 1.013956                | 5.197198 | 2.711705 |

|    |    |   |           |           |           |     |   |   |           |           |           |
|----|----|---|-----------|-----------|-----------|-----|---|---|-----------|-----------|-----------|
| 15 | 6  | 0 | -0.399949 | 5.303411  | 0.412894  | 84  | 1 | 0 | 2.643502  | 1.683182  | -2.946211 |
| 16 | 1  | 0 | -0.993878 | 5.047666  | -0.472023 | 85  | 1 | 0 | 1.806664  | -0.567946 | -3.559572 |
| 17 | 1  | 0 | -1.002907 | 5.969702  | 1.037205  | 86  | 1 | 0 | 2.178615  | 0.413805  | -4.981583 |
| 18 | 6  | 0 | 0.945137  | 5.917558  | -0.023791 | 87  | 1 | 0 | 3.282742  | -0.878232 | -4.505289 |
| 19 | 1  | 0 | 1.362045  | 6.568011  | 0.758145  | 88  | 1 | 0 | 5.001484  | 2.381114  | -3.504429 |
| 20 | 1  | 0 | 0.857898  | 6.530285  | -0.928406 | 89  | 1 | 0 | 5.219026  | 0.883003  | -4.416811 |
| 21 | 6  | 0 | 1.804611  | 4.691484  | -0.235899 | 90  | 1 | 0 | 4.039019  | 2.086765  | -4.962882 |
| 22 | 6  | 0 | 1.200418  | 3.555264  | 0.326989  | 91  | 6 | 0 | 4.310604  | 0.895329  | 1.843345  |
| 23 | 6  | 0 | 3.027147  | 4.596186  | -0.888477 | 92  | 6 | 0 | 5.647589  | 1.573436  | 2.206612  |
| 24 | 1  | 0 | 3.504194  | 5.477419  | -1.310210 | 93  | 6 | 0 | 3.892222  | -0.110626 | 2.929718  |
| 25 | 6  | 0 | 1.782388  | 2.303504  | 0.125142  | 94  | 1 | 0 | 3.550034  | 1.679410  | 1.829128  |
| 26 | 8  | 0 | -1.163372 | 1.647556  | -0.500558 | 95  | 1 | 0 | 5.914286  | 2.338744  | 1.469436  |
| 27 | 8  | 0 | 1.126932  | 1.169142  | 0.612319  | 96  | 1 | 0 | 5.582289  | 2.055729  | 3.189728  |
| 28 | 15 | 0 | -0.051930 | 0.471305  | -0.289245 | 97  | 1 | 0 | 6.466133  | 0.844483  | 2.242830  |
| 29 | 8  | 0 | 0.434609  | 0.076643  | -1.656492 | 98  | 1 | 0 | 2.929105  | -0.573689 | 2.692594  |
| 30 | 8  | 0 | -0.603336 | -0.624303 | 0.625962  | 99  | 1 | 0 | 4.629692  | -0.911449 | 3.059711  |
| 31 | 6  | 0 | -3.173279 | 1.710015  | 0.857077  | 100 | 1 | 0 | 3.792474  | 0.398423  | 3.896074  |
| 32 | 6  | 0 | 3.030387  | 2.174754  | -0.518939 | 101 | 6 | 0 | 6.292584  | -2.643530 | -1.185189 |
| 33 | 6  | 0 | -3.909788 | 0.760733  | -0.043873 | 102 | 6 | 0 | 5.816542  | -3.874441 | -0.392442 |
| 34 | 6  | 0 | -4.229580 | 1.145492  | -1.370016 | 103 | 6 | 0 | 7.756974  | -2.305451 | -0.844282 |
| 35 | 6  | 0 | -4.359035 | -0.496457 | 0.442405  | 104 | 1 | 0 | 6.257482  | -2.906833 | -2.251309 |
| 36 | 6  | 0 | -4.966886 | 0.268066  | -2.173896 | 105 | 1 | 0 | 4.797154  | -4.158281 | -0.676602 |
| 37 | 6  | 0 | -5.101485 | -1.325334 | -0.405013 | 106 | 1 | 0 | 6.471996  | -4.733418 | -0.580159 |
| 38 | 6  | 0 | -5.414402 | -0.970532 | -1.718721 | 107 | 1 | 0 | 5.822857  | -3.681989 | 0.687054  |
| 39 | 1  | 0 | -5.209728 | 0.566932  | -3.191271 | 108 | 1 | 0 | 8.112001  | -1.452038 | -1.432024 |
| 40 | 1  | 0 | -5.442092 | -2.284339 | -0.023561 | 109 | 1 | 0 | 7.868838  | -2.049593 | 0.216121  |
| 41 | 6  | 0 | 3.640037  | 3.348378  | -0.991775 | 110 | 1 | 0 | 8.411643  | -3.160517 | -1.052316 |
| 42 | 1  | 0 | 4.611806  | 3.264804  | -1.468016 | 111 | 6 | 0 | 0.154959  | -3.195982 | -1.461203 |
| 43 | 6  | 0 | 3.765297  | 0.873497  | -0.680239 | 112 | 8 | 0 | -0.470295 | -2.993432 | 0.075691  |
| 44 | 6  | 0 | 3.955433  | 0.308764  | -1.965893 | 113 | 6 | 0 | 0.500528  | -3.702219 | 0.916304  |
| 45 | 6  | 0 | 4.386727  | 0.276759  | 0.446165  | 114 | 6 | 0 | 1.658726  | -3.097174 | -1.152227 |
| 46 | 6  | 0 | 4.757983  | -0.834016 | -2.086622 | 115 | 1 | 0 | 2.155260  | -3.904215 | -1.696855 |
| 47 | 6  | 0 | 5.175809  | -0.864391 | 0.264923  | 116 | 1 | 0 | 2.040210  | -2.146258 | -1.526496 |
| 48 | 6  | 0 | 5.382092  | -1.436245 | -0.993736 | 117 | 8 | 0 | -0.440303 | -2.297817 | -2.236905 |
| 49 | 1  | 0 | 4.916358  | -1.260812 | -3.074405 | 118 | 8 | 0 | -0.182336 | -4.472343 | -1.770997 |
| 50 | 1  | 0 | 5.666263  | -1.301751 | 1.131186  | 119 | 6 | 0 | -1.547036 | -4.690473 | -2.171954 |
| 51 | 6  | 0 | -3.859405 | 2.506303  | -1.962283 | 120 | 1 | 0 | -1.654726 | -5.773586 | -2.245530 |
| 52 | 6  | 0 | -5.119865 | 3.348655  | -2.246086 | 121 | 1 | 0 | -1.742920 | -4.223286 | -3.139480 |
| 53 | 6  | 0 | -2.985782 | 2.373054  | -3.224286 | 122 | 1 | 0 | -2.234807 | -4.290703 | -1.421953 |
| 54 | 1  | 0 | -3.275131 | 3.058377  | -1.222725 | 123 | 1 | 0 | -0.531687 | -1.869587 | 0.317369  |
| 55 | 1  | 0 | -5.719673 | 3.483073  | -1.338797 | 124 | 1 | 0 | -0.087443 | -1.360697 | -2.080116 |
| 56 | 1  | 0 | -4.840809 | 4.341574  | -2.620023 | 125 | 6 | 0 | 0.242043  | -3.554032 | 2.396885  |
| 57 | 1  | 0 | -5.759203 | 2.876539  | -3.001342 | 126 | 6 | 0 | 0.343692  | -2.325003 | 3.065933  |
| 58 | 1  | 0 | -2.080187 | 1.796519  | -3.015762 | 127 | 6 | 0 | -0.077596 | -4.700672 | 3.135742  |
| 59 | 1  | 0 | -3.527535 | 1.878964  | -4.039779 | 128 | 6 | 0 | 0.126105  | -2.254470 | 4.441631  |
| 60 | 1  | 0 | -2.685806 | 3.365263  | -3.583973 | 129 | 1 | 0 | 0.555252  | -1.417992 | 2.510594  |
| 61 | 6  | 0 | -4.081201 | -0.994480 | 1.863494  | 130 | 6 | 0 | -0.286122 | -4.631373 | 4.513624  |
| 62 | 6  | 0 | -3.511787 | -2.425606 | 1.891410  | 131 | 1 | 0 | -0.162002 | -5.658160 | 2.626586  |
| 63 | 6  | 0 | -5.347911 | -0.930654 | 2.742744  | 132 | 6 | 0 | -0.184903 | -3.404811 | 5.170226  |
| 64 | 1  | 0 | -3.324366 | -0.343429 | 2.309108  | 133 | 1 | 0 | 0.199506  | -1.294449 | 4.945264  |
| 65 | 1  | 0 | -2.653879 | -2.527863 | 1.224410  | 134 | 1 | 0 | -0.530472 | -5.532493 | 5.069655  |
| 66 | 1  | 0 | -3.184229 | -2.679146 | 2.906390  | 135 | 1 | 0 | -0.349233 | -3.344135 | 6.242842  |
| 67 | 1  | 0 | -4.262575 | -3.169237 | 1.596653  | 136 | 1 | 0 | 0.361476  | -4.752183 | 0.645560  |
| 68 | 1  | 0 | -5.764122 | 0.080284  | 2.800731  | 137 | 6 | 0 | 1.851506  | -3.215942 | 0.377193  |
| 69 | 1  | 0 | -6.132768 | -1.585229 | 2.344363  | 138 | 1 | 0 | 2.656284  | -3.903386 | 0.651433  |
| 70 | 1  | 0 | -5.122625 | -1.262411 | 3.763891  | 139 | 1 | 0 | 2.096122  | -2.239229 | 0.804188  |
| 71 | 6  | 0 | -6.217428 | -1.892475 | -2.626770 |     |   |   |           |           |           |
| 72 | 6  | 0 | -7.636712 | -2.143202 | -2.083149 |     |   |   |           |           |           |
| 73 | 6  | 0 | -5.484026 | -3.221569 | -2.888185 |     |   |   |           |           |           |
| 74 | 1  | 0 | -6.321964 | -1.380964 | -3.593594 |     |   |   |           |           |           |
| 75 | 1  | 0 | -8.175795 | -1.200834 | -1.936755 |     |   |   |           |           |           |
| 76 | 1  | 0 | -8.215103 | -2.763755 | -2.778497 |     |   |   |           |           |           |
| 77 | 1  | 0 | -7.607436 | -2.663227 | -1.118137 |     |   |   |           |           |           |
| 78 | 1  | 0 | -4.485215 | -3.044310 | -3.302163 |     |   |   |           |           |           |
| 79 | 1  | 0 | -5.366614 | -3.798082 | -1.962463 |     |   |   |           |           |           |
| 80 | 1  | 0 | -6.045046 | -3.842149 | -3.597705 |     |   |   |           |           |           |
| 81 | 6  | 0 | 3.371115  | 0.922534  | -3.240726 |     |   |   |           |           |           |
| 82 | 6  | 0 | 2.618355  | -0.096823 | -4.116364 |     |   |   |           |           |           |
| 83 | 6  | 0 | 4.472637  | 1.610615  | -4.075053 |     |   |   |           |           |           |

TS-2nd-(S)-reaction pathway: S-re/(S)-1ba (SPINOL-TRIP)

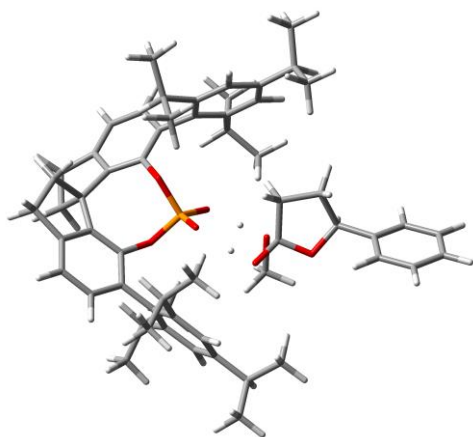

B3LYP/6-31G(d); E(B3LYP) = -3122.215322 hartree

Zero-point correction= 1.195975 hartree

Thermal correction to Energy= 1.261942 hartree

Thermal correction to Enthalpy= 1.262886 hartree

Thermal correction to Gibbs Free Energy= 1.092212 hartree

Sum of electronic and Zero-point Energies= -3121.019347 hartree

Sum of electronic and thermal Energies= -3120.953380 hartree

Sum of electronic and thermal Enthalpies= -3120.952436 hartree

Sum of electronic and thermal Free Energies= -3121.123110 hartree

The number of Imaginary frequencies = 1

| Center Number | Atomic Number | Atomic Type | Coordinates (Angstroms) |           |           |
|---------------|---------------|-------------|-------------------------|-----------|-----------|
|               |               |             | X                       | Y         | Z         |
| 1             | 6             | 0           | 2.753138                | -0.746831 | -0.072823 |
| 2             | 8             | 0           | 4.003582                | -1.164333 | -0.373315 |
| 3             | 8             | 0           | 2.102800                | -0.382048 | -1.634852 |
| 4             | 6             | 0           | 4.870634                | -0.000790 | -0.507632 |
| 5             | 6             | 0           | 4.301869                | 0.979804  | 0.538888  |
| 6             | 6             | 0           | 2.796035                | 0.652332  | 0.558018  |
| 7             | 1             | 0           | 4.727251                | 0.402606  | -1.517239 |
| 8             | 1             | 0           | 4.759906                | 0.775176  | 1.511568  |
| 9             | 1             | 0           | 4.513708                | 2.018979  | 0.275555  |
| 10            | 1             | 0           | 2.376592                | 0.602580  | 1.564914  |
| 11            | 1             | 0           | 2.201324                | 1.367506  | -0.011596 |
| 12            | 8             | 0           | 2.016464                | -1.718456 | 0.417071  |
| 13            | 6             | 0           | 2.020706                | -1.533252 | -2.500848 |
| 14            | 1             | 0           | 1.432607                | -2.328253 | -2.034592 |
| 15            | 1             | 0           | 1.549076                | -1.206341 | -3.430000 |
| 16            | 1             | 0           | 3.037042                | -1.878827 | -2.693609 |
| 17            | 1             | 0           | 1.114085                | -1.349377 | 0.724722  |
| 18            | 1             | 0           | 1.101841                | 0.008663  | -1.482358 |
| 19            | 6             | 0           | -3.843910               | 1.713244  | -0.634816 |
| 20            | 6             | 0           | -2.563751               | 2.113854  | -0.253840 |
| 21            | 6             | 0           | -2.816794               | 4.144160  | -1.516341 |
| 22            | 6             | 0           | -4.046785               | 3.705496  | -2.007320 |
| 23            | 6             | 0           | -4.548813               | 2.484789  | -1.572984 |
| 24            | 1             | 0           | -2.435458               | 5.114611  | -1.817296 |
| 25            | 1             | 0           | -4.602130               | 4.316471  | -2.714787 |
| 26            | 6             | 0           | -5.829553               | 1.789865  | -1.982495 |
| 27            | 1             | 0           | -6.711171               | 2.279329  | -1.545250 |
| 28            | 1             | 0           | -5.976256               | 1.793482  | -3.068824 |
| 29            | 6             | 0           | -4.736840               | 0.573630  | -0.146241 |
| 30            | 6             | 0           | -5.633344               | 0.368011  | -1.413002 |
| 31            | 1             | 0           | -5.086231               | -0.249508 | -2.134465 |
| 32            | 1             | 0           | -6.573872               | -0.141929 | -1.182286 |
| 33            | 6             | 0           | -5.634506               | 1.040502  | 1.050582  |
| 34            | 1             | 0           | -4.992800               | 1.498539  | 1.812035  |
| 35            | 1             | 0           | -6.379346               | 1.784217  | 0.750974  |
| 36            | 6             | 0           | -6.252802               | -0.261628 | 1.603543  |

|     |    |   |           |           |           |
|-----|----|---|-----------|-----------|-----------|
| 37  | 1  | 0 | -7.194902 | -0.506056 | 1.092674  |
| 38  | 1  | 0 | -6.483114 | -0.199564 | 2.673397  |
| 39  | 6  | 0 | -5.177368 | -1.282611 | 1.302401  |
| 40  | 6  | 0 | -4.233901 | -0.756964 | 0.405658  |
| 41  | 6  | 0 | -5.039449 | -2.573576 | 1.798979  |
| 42  | 1  | 0 | -5.780478 | -2.992232 | 2.475601  |
| 43  | 6  | 0 | -3.086198 | -1.492274 | 0.117578  |
| 44  | 6  | 0 | -3.928136 | -3.328254 | 1.422435  |
| 45  | 1  | 0 | -3.819923 | -4.344299 | 1.789840  |
| 46  | 8  | 0 | -1.807413 | 1.286747  | 0.575798  |
| 47  | 8  | 0 | -2.116444 | -0.926497 | -0.706904 |
| 48  | 15 | 0 | -0.959607 | 0.049949  | -0.077263 |
| 49  | 8  | 0 | -0.213937 | -0.586989 | 1.068430  |
| 50  | 8  | 0 | -0.168453 | 0.509192  | -1.295134 |
| 51  | 6  | 0 | -2.030462 | 3.353770  | -0.663037 |
| 52  | 6  | 0 | -2.910593 | -2.801961 | 0.610283  |
| 53  | 6  | 0 | 6.307625  | -0.411205 | -0.313459 |
| 54  | 6  | 0 | 7.309555  | 0.194888  | -1.078621 |
| 55  | 6  | 0 | 6.665563  | -1.355572 | 0.657275  |
| 56  | 6  | 0 | 8.652219  | -0.124439 | -0.869917 |
| 57  | 1  | 0 | 7.038612  | 0.919788  | -1.843321 |
| 58  | 6  | 0 | 8.005802  | -1.683318 | 0.857626  |
| 59  | 1  | 0 | 5.889590  | -1.844794 | 1.238270  |
| 60  | 6  | 0 | 9.002866  | -1.065563 | 0.098577  |
| 61  | 1  | 0 | 9.420853  | 0.354691  | -1.470255 |
| 62  | 1  | 0 | 8.272391  | -2.423950 | 1.606833  |
| 63  | 1  | 0 | 10.046826 | -1.321715 | 0.257604  |
| 64  | 6  | 0 | -0.693294 | 3.858286  | -0.200785 |
| 65  | 6  | 0 | -0.493126 | 4.188387  | 1.164347  |
| 66  | 6  | 0 | 0.354544  | 4.081061  | -1.130895 |
| 67  | 6  | 0 | 0.735598  | 4.723328  | 1.564795  |
| 68  | 6  | 0 | 1.563025  | 4.621317  | -0.670982 |
| 69  | 6  | 0 | 1.780278  | 4.952433  | 0.667041  |
| 70  | 1  | 0 | 0.870954  | 4.983560  | 2.611603  |
| 71  | 1  | 0 | 2.362319  | 4.803249  | -1.386420 |
| 72  | 6  | 0 | -1.688543 | -3.616800 | 0.306570  |
| 73  | 6  | 0 | -0.807506 | -4.000252 | 1.352844  |
| 74  | 6  | 0 | -1.418349 | -4.033266 | -1.019640 |
| 75  | 6  | 0 | 0.323761  | -4.760306 | 1.038911  |
| 76  | 6  | 0 | -0.261873 | -4.781257 | -1.274696 |
| 77  | 6  | 0 | 0.630426  | -5.148668 | -0.266608 |
| 78  | 1  | 0 | 0.995422  | -5.047506 | 1.843470  |
| 79  | 1  | 0 | -0.056938 | -5.103448 | -2.293999 |
| 80  | 6  | 0 | 3.093168  | 5.586925  | 1.108911  |
| 81  | 6  | 0 | 3.755821  | 4.836610  | 2.278198  |
| 82  | 6  | 0 | 2.903547  | 7.077294  | 1.454332  |
| 83  | 1  | 0 | 3.780275  | 5.534755  | 0.252472  |
| 84  | 1  | 0 | 3.915414  | 3.780036  | 2.035871  |
| 85  | 1  | 0 | 4.728413  | 5.281684  | 2.519970  |
| 86  | 1  | 0 | 3.139902  | 4.879254  | 3.183915  |
| 87  | 1  | 0 | 2.472928  | 7.626529  | 0.610086  |
| 88  | 1  | 0 | 2.229223  | 7.199559  | 2.310364  |
| 89  | 1  | 0 | 3.862553  | 7.542803  | 1.713004  |
| 90  | 6  | 0 | -1.584444 | 4.038139  | 2.224952  |
| 91  | 6  | 0 | -2.019502 | 5.411365  | 2.775343  |
| 92  | 6  | 0 | -1.158411 | 3.091275  | 3.363292  |
| 93  | 1  | 0 | -2.464779 | 3.596574  | 1.752661  |
| 94  | 1  | 0 | -2.361700 | 6.071286  | 1.970099  |
| 95  | 1  | 0 | -2.842509 | 5.293730  | 3.490984  |
| 96  | 1  | 0 | -1.197756 | 5.918214  | 3.295133  |
| 97  | 1  | 0 | -0.886435 | 2.107124  | 2.971056  |
| 98  | 1  | 0 | -0.302242 | 3.489963  | 3.920930  |
| 99  | 1  | 0 | -1.981925 | 2.960194  | 4.076090  |
| 100 | 6  | 0 | 0.219644  | 3.793070  | -2.628444 |
| 101 | 6  | 0 | 1.381141  | 2.952321  | -3.190550 |
| 102 | 6  | 0 | 0.095720  | 5.102877  | -3.435917 |
| 103 | 1  | 0 | -0.692947 | 3.211461  | -2.780335 |
| 104 | 1  | 0 | 1.494038  | 2.014842  | -2.642947 |
| 105 | 1  | 0 | 1.187467  | 2.709237  | -4.242558 |



|     |   |   |           |           |           |
|-----|---|---|-----------|-----------|-----------|
| 106 | 1 | 0 | 2.335132  | 3.492330  | -3.154425 |
| 107 | 1 | 0 | -0.746615 | 5.716638  | -3.100480 |
| 108 | 1 | 0 | 1.003719  | 5.710497  | -3.337593 |
| 109 | 1 | 0 | -0.047990 | 4.885641  | -4.501536 |
| 110 | 6 | 0 | -2.375392 | -3.763749 | -2.182110 |
| 111 | 6 | 0 | -3.010784 | -5.077289 | -2.682611 |
| 112 | 6 | 0 | -1.706662 | -2.998864 | -3.339389 |
| 113 | 1 | 0 | -3.191996 | -3.137814 | -1.814382 |
| 114 | 1 | 0 | -3.528574 | -5.600857 | -1.871182 |
| 115 | 1 | 0 | -3.739883 | -4.873583 | -3.476565 |
| 116 | 1 | 0 | -2.255154 | -5.759419 | -3.090118 |
| 117 | 1 | 0 | -1.305883 | -2.041651 | -2.993298 |
| 118 | 1 | 0 | -0.890824 | -3.577625 | -3.789831 |
| 119 | 1 | 0 | -2.437952 | -2.794820 | -4.131273 |
| 120 | 6 | 0 | -1.043453 | -3.644899 | 2.824132  |
| 121 | 6 | 0 | 0.153842  | -2.922641 | 3.470920  |
| 122 | 6 | 0 | -1.414241 | -4.902043 | 3.638012  |
| 123 | 1 | 0 | -1.888585 | -2.954798 | 2.877945  |
| 124 | 1 | 0 | 0.369110  | -1.989514 | 2.946339  |
| 125 | 1 | 0 | -0.078975 | -2.681638 | 4.515678  |
| 126 | 1 | 0 | 1.058798  | -3.541645 | 3.471386  |
| 127 | 1 | 0 | -2.289717 | -5.413334 | 3.222071  |
| 128 | 1 | 0 | -0.588448 | -5.623561 | 3.649840  |
| 129 | 1 | 0 | -1.639415 | -4.634816 | 4.677800  |
| 130 | 6 | 0 | 1.870480  | -5.973271 | -0.586727 |
| 131 | 6 | 0 | 1.710199  | -7.431722 | -0.113757 |
| 132 | 6 | 0 | 3.160083  | -5.351751 | -0.019037 |
| 133 | 1 | 0 | 1.967901  | -5.993583 | -1.681472 |
| 134 | 1 | 0 | 0.823476  | -7.897905 | -0.557428 |
| 135 | 1 | 0 | 2.586905  | -8.030001 | -0.391144 |
| 136 | 1 | 0 | 1.601929  | -7.480733 | 0.976532  |
| 137 | 1 | 0 | 3.270551  | -4.305198 | -0.320030 |
| 138 | 1 | 0 | 3.167099  | -5.379823 | 1.077036  |
| 139 | 1 | 0 | 4.037976  | -5.909935 | -0.366726 |

---

## 10. Structural Properties of CPAs Derived from BINOL and SPINOL Backbones

### BINOL-derived CPA (*R*)-1aa

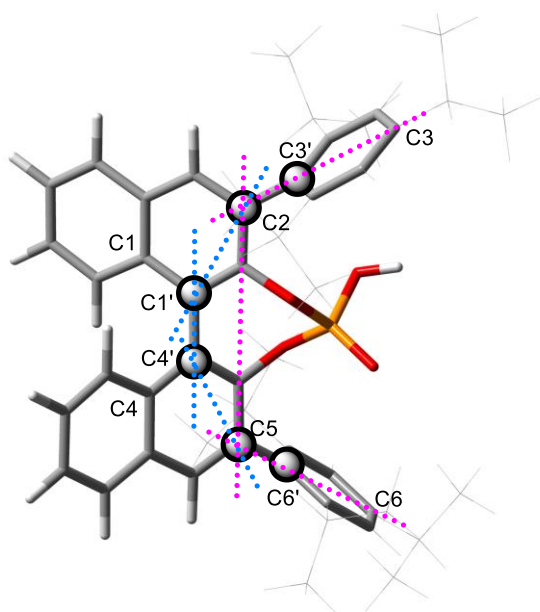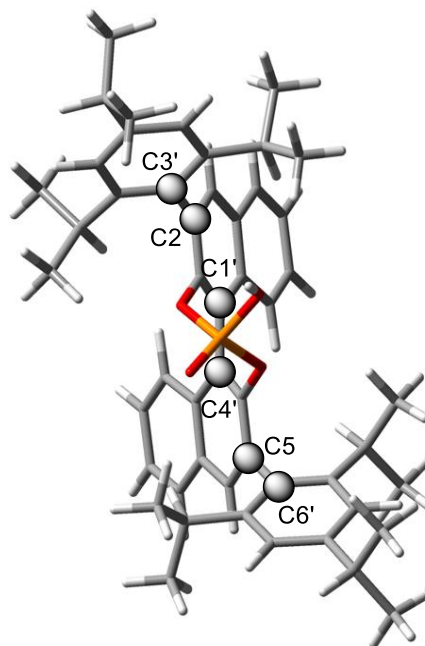

length of C2-C5: 5.89 Å

angle (average) of C3'-C2-C5 / C2-C5-C6': 123.7°

dihedral angle of C2-C1'-C4'-C5: 64.7°

### SPINOL-derived CPA (*S*)-1ba

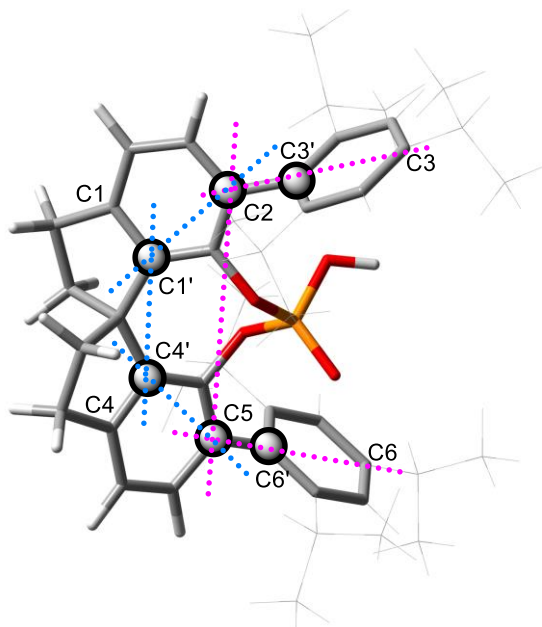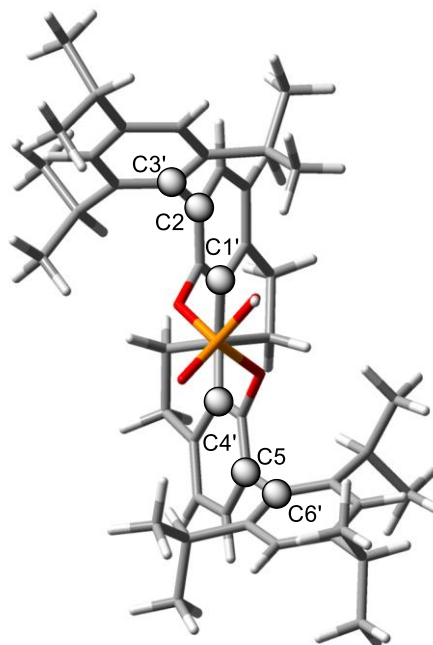

length of C2-C5: 6.38 Å

angle (average) of C3'-C2-C5 / C2-C5-C6': 114.6°

dihedral angle of C2-C1'-C4'-C5: 46.0°

## 11. DFT Calculation of SPINOL-derived CPAs Having Bulky Substituents

### Optimized structure of SPINOL-derived CPA (S)-1bd

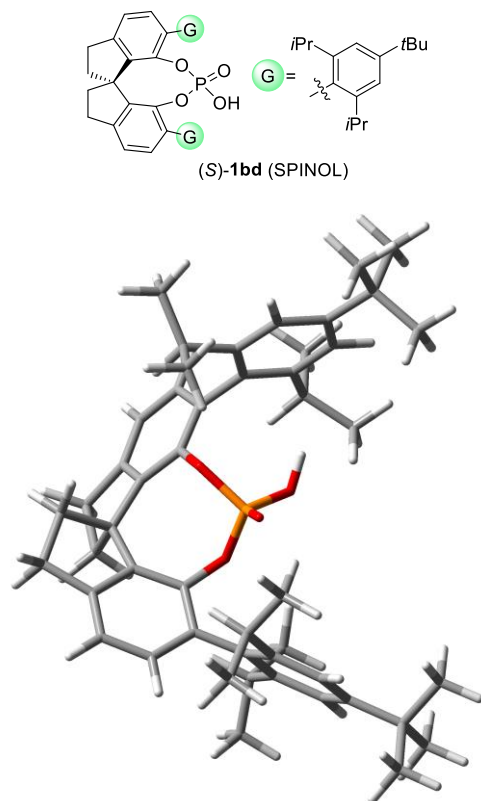

E(RB3LYP) = -2547.55701922 Hartree  
 Zero-point correction= 1.017548 Hartree  
 Thermal correction to Energy= 1.072477 Hartree  
 Thermal correction to Enthalpy= 1.073421 Hartree  
 Thermal correction to Gibbs Free Energy= 0.930016 Hartree  
 Sum of electronic and zero-point Energies= -2546.539472 Hartree  
 Sum of electronic and thermal Energies= -2546.484542 Hartree  
 Sum of electronic and thermal Enthalpies= -2546.483598 Hartree  
 Sum of electronic and thermal Free Energies= -2546.627003 Hartree

The number of Imaginary frequencies = 0

| Center Number | Atomic Number | Atomic Type | Coordinates (Angstroms) |           |           |
|---------------|---------------|-------------|-------------------------|-----------|-----------|
|               |               |             | X                       | Y         | Z         |
| 1             | 1             | 0           | 1.526613                | -1.289948 | -0.695755 |
| 2             | 6             | 0           | -1.186971               | 2.993795  | 0.538045  |
| 3             | 6             | 0           | -1.742845               | 1.749544  | 0.245189  |
| 4             | 6             | 0           | -3.720794               | 2.317197  | 1.475268  |
| 5             | 6             | 0           | -3.137887               | 3.517612  | 1.883415  |
| 6             | 6             | 0           | -1.868984               | 3.846899  | 1.420752  |
| 7             | 1             | 0           | -4.724834               | 2.068117  | 1.803936  |
| 8             | 1             | 0           | -3.675306               | 4.184389  | 2.553203  |
| 9             | 6             | 0           | -1.024773               | 5.060109  | 1.748256  |
| 10            | 1             | 0           | -1.403830               | 5.962198  | 1.247995  |
| 11            | 1             | 0           | -1.010609               | 5.279717  | 2.821891  |
| 12            | 6             | 0           | 0.052901                | 3.709565  | 0.000807  |
| 13            | 6             | 0           | 0.364808                | 4.656976  | 1.206476  |
| 14            | 1             | 0           | 0.911346                | 4.090225  | 1.968833  |
| 15            | 1             | 0           | 0.983751                | 5.512098  | 0.917287  |
| 16            | 6             | 0           | -0.305474               | 4.574079  | -1.257485 |
| 17            | 1             | 0           | -0.851831               | 3.946985  | -1.971255 |
| 18            | 1             | 0           | -0.942100               | 5.428433  | -1.009041 |

|    |    |   |           |           |           |
|----|----|---|-----------|-----------|-----------|
| 19 | 6  | 0 | 1.058623  | 4.977045  | -1.856899 |
| 20 | 1  | 0 | 1.435774  | 5.905816  | -1.406260 |
| 21 | 1  | 0 | 1.012613  | 5.148028  | -2.938350 |
| 22 | 6  | 0 | 1.930051  | 3.794879  | -1.494366 |
| 23 | 6  | 0 | 1.305652  | 3.006043  | -0.514548 |
| 24 | 6  | 0 | 3.169129  | 3.434672  | -2.012049 |
| 25 | 1  | 0 | 3.664336  | 4.058374  | -2.752020 |
| 26 | 6  | 0 | 1.892807  | 1.798226  | -0.152323 |
| 27 | 6  | 0 | 3.766455  | 2.247064  | -1.586456 |
| 28 | 1  | 0 | 4.735482  | 1.961868  | -1.983736 |
| 29 | 8  | 0 | -0.985898 | 0.828493  | -0.501188 |
| 30 | 8  | 0 | 1.250696  | 0.985406  | 0.784218  |
| 31 | 15 | 0 | 0.080649  | -0.054699 | 0.339947  |
| 32 | 8  | 0 | 0.663853  | -0.882843 | -0.905232 |
| 33 | 8  | 0 | -0.392845 | -0.792724 | 1.522713  |
| 34 | 6  | 0 | -3.032669 | 1.388504  | 0.677752  |
| 35 | 6  | 0 | 3.130465  | 1.381631  | -0.683330 |
| 36 | 6  | 0 | 3.725883  | 0.047606  | -0.333082 |
| 37 | 6  | 0 | 3.854688  | -0.967448 | -1.325880 |
| 38 | 6  | 0 | 4.164958  | -0.219589 | 0.985204  |
| 39 | 6  | 0 | 4.375851  | -2.211829 | -0.953044 |
| 40 | 6  | 0 | 4.687171  | -1.483526 | 1.292476  |
| 41 | 6  | 0 | 4.795424  | -2.506886 | 0.350259  |
| 42 | 1  | 0 | 4.465553  | -2.976361 | -1.718675 |
| 43 | 1  | 0 | 5.016357  | -1.659472 | 2.309836  |
| 44 | 6  | 0 | -3.681908 | 0.088764  | 0.299284  |
| 45 | 6  | 0 | -4.059607 | -0.148377 | -1.042476 |
| 46 | 6  | 0 | -3.977885 | -0.885721 | 1.287301  |
| 47 | 6  | 0 | -4.711069 | -1.345034 | -1.369998 |
| 48 | 6  | 0 | -4.637111 | -2.055556 | 0.901353  |
| 49 | 6  | 0 | -5.014495 | -2.320793 | -0.420028 |
| 50 | 1  | 0 | -4.991812 | -1.501717 | -2.405369 |
| 51 | 1  | 0 | -4.857772 | -2.791417 | 1.668838  |
| 52 | 6  | 0 | -3.625874 | -0.710989 | 2.766713  |
| 53 | 6  | 0 | -4.889988 | -0.443120 | 3.609842  |
| 54 | 6  | 0 | -2.846915 | -1.910295 | 3.339980  |
| 55 | 1  | 0 | -2.970478 | 0.159140  | 2.858354  |
| 56 | 1  | 0 | -5.576314 | -1.298036 | 3.573604  |
| 57 | 1  | 0 | -5.442121 | 0.435057  | 3.256675  |
| 58 | 1  | 0 | -1.936734 | -2.087961 | 2.764048  |
| 59 | 1  | 0 | -3.449884 | -2.826461 | 3.347153  |
| 60 | 6  | 0 | -3.833051 | 0.868259  | -2.162535 |
| 61 | 6  | 0 | -2.950902 | 0.301945  | -3.291674 |
| 62 | 6  | 0 | -5.170986 | 1.398340  | -2.716258 |
| 63 | 1  | 0 | -3.304926 | 1.728959  | -1.743757 |
| 64 | 1  | 0 | -3.435360 | -0.540890 | -3.798944 |
| 65 | 1  | 0 | -1.989257 | -0.043639 | -2.900924 |
| 66 | 1  | 0 | -5.780244 | 1.842817  | -1.921222 |
| 67 | 1  | 0 | -5.760562 | 0.598778  | -3.180007 |
| 68 | 6  | 0 | 3.507038  | -0.746155 | -2.804147 |
| 69 | 6  | 0 | 4.795313  | -0.579963 | -3.638513 |
| 70 | 6  | 0 | 2.634238  | -1.859286 | -3.417498 |
| 71 | 1  | 0 | 2.936687  | 0.182951  | -2.884014 |
| 72 | 1  | 0 | 5.390253  | -1.501092 | -3.627121 |
| 73 | 1  | 0 | 5.430879  | 0.224988  | -3.254873 |
| 74 | 1  | 0 | 1.686163  | -1.977048 | -2.885178 |
| 75 | 1  | 0 | 3.145328  | -2.828771 | -3.428568 |
| 76 | 6  | 0 | 4.151275  | 0.837479  | 2.089717  |
| 77 | 6  | 0 | 3.372957  | 0.380715  | 3.338163  |
| 78 | 6  | 0 | 5.588840  | 1.260481  | 2.455794  |
| 79 | 1  | 0 | 3.648759  | 1.727726  | 1.703666  |
| 80 | 1  | 0 | 3.857221  | -0.471047 | 3.830551  |
| 81 | 1  | 0 | 2.349269  | 0.091848  | 3.083483  |
| 82 | 1  | 0 | 6.129012  | 1.635219  | 1.579029  |
| 83 | 1  | 0 | 6.161803  | 0.421132  | 2.867552  |
| 84 | 1  | 0 | -4.622363 | -0.274449 | 4.660194  |
| 85 | 1  | 0 | -2.560486 | -1.702324 | 4.378409  |
| 86 | 1  | 0 | -4.993695 | 2.166409  | -3.479286 |
| 87 | 1  | 0 | -2.757882 | 1.073493  | -4.047596 |

|     |   |   |          |           |           |     |   |   |           |           |           |
|-----|---|---|----------|-----------|-----------|-----|---|---|-----------|-----------|-----------|
| 88  | 1 | 0 | 2.397425 | -1.607774 | -4.457870 | 104 | 1 | 0 | 4.651226  | -5.972706 | 0.613820  |
| 89  | 1 | 0 | 4.550226 | -0.351302 | -4.682633 | 105 | 6 | 0 | -5.729888 | -3.639330 | -0.767991 |
| 90  | 1 | 0 | 3.326246 | 1.196102  | 4.070105  | 106 | 6 | 0 | -4.818299 | -4.832628 | -0.394902 |
| 91  | 1 | 0 | 5.572573 | 2.055487  | 3.211045  | 107 | 1 | 0 | -4.571676 | -4.838706 | 0.671756  |
| 92  | 6 | 0 | 5.350700 | -3.903489 | 0.684688  | 108 | 1 | 0 | -5.315876 | -5.782116 | -0.629298 |
| 93  | 6 | 0 | 6.599941 | -4.183860 | -0.184262 | 109 | 1 | 0 | -3.876312 | -4.794316 | -0.953694 |
| 94  | 1 | 0 | 7.386975 | -3.446431 | 0.010891  | 110 | 6 | 0 | -6.068834 | -3.747261 | -2.266880 |
| 95  | 1 | 0 | 7.003473 | -5.178988 | 0.039256  | 111 | 1 | 0 | -6.740035 | -2.944243 | -2.592403 |
| 96  | 1 | 0 | 6.369619 | -4.151537 | -1.254334 | 112 | 1 | 0 | -5.169008 | -3.715127 | -2.891637 |
| 97  | 6 | 0 | 5.757310 | -4.034240 | 2.164782  | 113 | 1 | 0 | -6.573934 | -4.699928 | -2.463700 |
| 98  | 1 | 0 | 6.548403 | -3.325678 | 2.435562  | 114 | 6 | 0 | -7.051565 | -3.736317 | 0.030526  |
| 99  | 1 | 0 | 4.907384 | -3.872849 | 2.837347  | 115 | 1 | 0 | -7.569742 | -4.675600 | -0.199967 |
| 100 | 1 | 0 | 6.140488 | -5.043381 | 2.353405  | 116 | 1 | 0 | -6.877811 | -3.708190 | 1.111181  |
| 101 | 6 | 0 | 4.269491 | -4.969762 | 0.387034  | 117 | 1 | 0 | -7.722771 | -2.907104 | -0.221298 |
| 102 | 1 | 0 | 3.374362 | -4.801656 | 0.996582  |     |   |   |           |           |           |
| 103 | 1 | 0 | 3.964616 | -4.960088 | -0.664701 |     |   |   |           |           |           |

DFT calculation for all conformations of real system using Cy-SPINOL-derived CPA (S)-1bd

| TS            | Orientation I | Orientation II | G <sup>‡</sup> (a.u.) | ΔΔG <sup>‡</sup> (kcal/mmol) |
|---------------|---------------|----------------|-----------------------|------------------------------|
| <i>R-anti</i> | up            | up             | -3199.692163          | -2.59                        |
|               | up            | down           | -3199.692191          | -2.61                        |
|               | down          | up             | -3199.691950          | -2.46                        |
|               | down          | down           | -3199.692144          | -2.58                        |
| <i>S-anti</i> | up            | up             | -3199.684283          | 2.35                         |
|               | up            | down           | -3199.684180          | 2.42                         |
|               | down          | up             | -3199.683759          | 2.68                         |
|               | down          | down           | -3199.683107          | 3.09                         |
| <i>S-syn</i>  | up            | up             | -3199.68538           | 1.66                         |
|               | up            | down           | -3199.685436          | 1.63                         |
|               | down          | down           | -3199.685107          | 1.84                         |
|               | down          | up             | -3199.685173          | 1.79                         |

| TS          | Orientation I | Orientation II | G <sup>‡</sup> (a.u.) | ΔΔG <sup>‡</sup> (kcal/mmol) |
|-------------|---------------|----------------|-----------------------|------------------------------|
| <i>R-re</i> | up            | up             | -3199.688032          | 0.00                         |
|             | up            | down           | -3199.687747          | 0.18                         |
|             | down          | up             | -3199.687644          | 0.24                         |
|             | down          | down           | -3199.687453          | 0.36                         |
| <i>S-si</i> | up            | up             | -3199.686632          | 0.88                         |
|             | up            | down           | -3199.686294          | 1.09                         |
|             | down          | up             | -3199.686600          | 0.90                         |
|             | down          | down           | -3199.686177          | 1.16                         |
| <i>S-re</i> | up            | up             | -3199.688944          | -0.57                        |
|             | up            | down           | -3199.688381          | -0.22                        |
|             | down          | up             | -3199.688449          | -0.26                        |
|             | down          | down           | -3199.687898          | 0.08                         |

\* Assignments of “up” and “down” are shown in ESI page S55.

DFT calculation of real system using SPINOL-derived CPA (S)-1bd

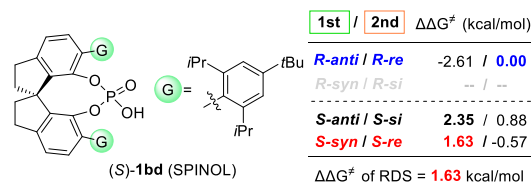

TS-1st-(R)-reaction pathway: *R-anti*-(S)-1bd (SPINOL)

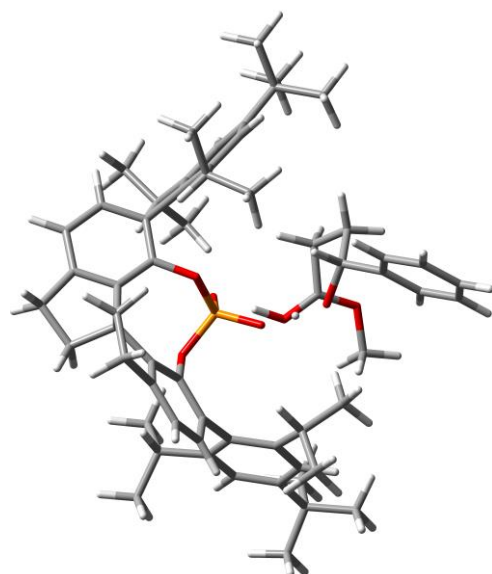

E(RB3LYP) = -3200.83786196 Hartree

Zero-point correction = 1.250976 Hartree  
 Thermal correction to Energy = 1.319163 Hartree  
 Thermal correction to Enthalpy = 1.320107 Hartree  
 Thermal correction to Gibbs Free Energy = 1.145671 Hartree  
 Sum of electronic and zero-point Energies = -3199.586886 Hartree  
 Sum of electronic and thermal Energies = -3199.518699 Hartree  
 Sum of electronic and thermal Enthalpies = -3199.517755 Hartree  
 Sum of electronic and thermal Free Energies = -3199.692191 Hartree  
 The number of Imaginary frequencies = 1

| Center Number | Atomic Number | Atomic Type | Coordinates (Angstroms) |           |           |
|---------------|---------------|-------------|-------------------------|-----------|-----------|
|               |               |             | X                       | Y         | Z         |
| 1             | 6             | 0           | 0.112774                | -2.961103 | -1.507571 |
| 2             | 8             | 0           | -0.200766               | -2.705750 | 0.152069  |
| 3             | 6             | 0           | 0.976165                | -3.090501 | 0.926028  |
| 4             | 6             | 0           | 1.956342                | -3.690546 | -0.104587 |
| 5             | 6             | 0           | 1.629159                | -2.979274 | -1.417304 |
| 6             | 1             | 0           | 1.396104                | -2.163495 | 1.330609  |
| 7             | 1             | 0           | 1.792652                | -4.767581 | -0.202986 |
| 8             | 1             | 0           | 2.989268                | -3.530471 | 0.212728  |
| 9             | 1             | 0           | 2.033764                | -3.491487 | -2.294875 |
| 10            | 1             | 0           | 1.993280                | -1.947924 | -1.416050 |
| 11            | 8             | 0           | -0.528984               | -2.006613 | -2.162449 |
| 12            | 8             | 0           | -0.378307               | -4.196508 | -1.737970 |
| 13            | 6             | 0           | -1.800425               | -4.294691 | -1.939425 |
| 14            | 1             | 0           | -2.009157               | -5.364166 | -1.988112 |
| 15            | 1             | 0           | -2.090299               | -3.807734 | -2.872892 |
| 16            | 1             | 0           | -2.336674               | -3.839832 | -1.102113 |
| 17            | 1             | 0           | -0.437668               | -1.616758 | 0.396848  |
| 18            | 1             | 0           | -0.135973               | -1.085065 | -1.986498 |
| 19            | 6             | 0           | 1.089409                | 3.834887  | 0.415643  |
| 20            | 6             | 0           | 1.703759                | 2.594437  | 0.241819  |

|    |    |   |           |           |           |     |   |   |           |           |           |
|----|----|---|-----------|-----------|-----------|-----|---|---|-----------|-----------|-----------|
| 21 | 6  | 0 | 3.537583  | 3.661204  | -0.891049 | 90  | 6 | 0 | 5.451784  | 1.604249  | 2.630033  |
| 22 | 6  | 0 | 2.890973  | 4.893974  | -0.820336 | 91  | 1 | 0 | 3.470709  | 2.012372  | 1.961532  |
| 23 | 6  | 0 | 1.663017  | 4.972422  | -0.174950 | 92  | 1 | 0 | 4.001758  | -0.803081 | 3.046106  |
| 24 | 1  | 0 | 4.513771  | 3.593298  | -1.360843 | 93  | 1 | 0 | 2.427498  | -0.144175 | 2.538963  |
| 25 | 1  | 0 | 3.346530  | 5.777165  | -1.261331 | 94  | 1 | 0 | 5.935743  | 2.353022  | 1.993166  |
| 26 | 6  | 0 | 0.767850  | 6.178549  | 0.003517  | 95  | 1 | 0 | 6.155228  | 0.773618  | 2.761645  |
| 27 | 1  | 0 | 1.166409  | 6.864101  | 0.764717  | 96  | 6 | 0 | -3.896430 | -0.876338 | 2.189192  |
| 28 | 1  | 0 | 0.661655  | 6.761156  | -0.918822 | 97  | 6 | 0 | -5.134289 | -0.888890 | 3.110687  |
| 29 | 6  | 0 | -0.128617 | 4.247683  | 1.238487  | 98  | 6 | 0 | -3.207476 | -2.253225 | 2.233212  |
| 30 | 6  | 0 | -0.558884 | 5.538688  | 0.461238  | 99  | 1 | 0 | -3.182282 | -0.153042 | 2.591096  |
| 31 | 1  | 0 | -1.147788 | 5.240838  | -0.413836 | 100 | 1 | 0 | -5.874088 | -1.620713 | 2.763690  |
| 32 | 1  | 0 | -1.178583 | 6.205083  | 1.068907  | 101 | 1 | 0 | -5.631676 | 0.085928  | 3.148915  |
| 33 | 6  | 0 | 0.268560  | 4.633732  | 2.702733  | 102 | 1 | 0 | -2.340274 | -2.286787 | 1.571623  |
| 34 | 1  | 0 | 0.856912  | 3.816018  | 3.134668  | 103 | 1 | 0 | -3.889610 | -3.062753 | 1.945870  |
| 35 | 1  | 0 | 0.877075  | 5.542471  | 2.746209  | 104 | 6 | 0 | -4.038206 | 2.503335  | -1.739466 |
| 36 | 6  | 0 | -1.078971 | 4.760736  | 3.447901  | 105 | 6 | 0 | -3.204337 | 2.374688  | -3.028434 |
| 37 | 1  | 0 | -1.476851 | 5.783322  | 3.385348  | 106 | 6 | 0 | -5.349874 | 3.271487  | -1.999455 |
| 38 | 1  | 0 | -0.995052 | 4.522510  | 4.514618  | 107 | 1 | 0 | -3.456299 | 3.107267  | -1.039540 |
| 39 | 6  | 0 | -1.958081 | 3.777201  | 2.705199  | 108 | 1 | 0 | -3.744695 | 1.821155  | -3.805956 |
| 40 | 6  | 0 | -1.339384 | 3.362346  | 1.515801  | 109 | 1 | 0 | -2.259911 | 1.858562  | -2.834010 |
| 41 | 6  | 0 | -3.211359 | 3.288423  | 3.054437  | 110 | 1 | 0 | -5.923093 | 3.401804  | -1.074558 |
| 42 | 1  | 0 | -3.708005 | 3.623624  | 3.961738  | 111 | 1 | 0 | -5.990770 | 2.745861  | -2.717256 |
| 43 | 6  | 0 | -1.923440 | 2.346769  | 0.762317  | 112 | 1 | 0 | 4.057474  | 2.392304  | -4.844107 |
| 44 | 6  | 0 | -3.834979 | 2.364989  | 2.214807  | 113 | 1 | 0 | 2.229716  | 0.686607  | -4.849479 |
| 45 | 1  | 0 | -4.832827 | 2.012981  | 2.455185  | 114 | 1 | 0 | 5.282644  | 2.054392  | 3.615823  |
| 46 | 8  | 0 | 1.077073  | 1.453741  | 0.747222  | 115 | 1 | 0 | 3.271984  | 0.539591  | 3.939110  |
| 47 | 8  | 0 | -1.233803 | 1.846892  | -0.343982 | 116 | 1 | 0 | -2.863341 | -2.467590 | 3.252051  |
| 48 | 15 | 0 | -0.083559 | 0.707334  | -0.135389 | 117 | 1 | 0 | -4.848575 | -1.162832 | 4.133812  |
| 49 | 8  | 0 | -0.594123 | -0.400259 | 0.786620  | 118 | 1 | 0 | -2.975035 | 3.368530  | -3.432725 |
| 50 | 8  | 0 | 0.399706  | 0.319989  | -1.508204 | 119 | 1 | 0 | -5.136551 | 4.265919  | -2.410658 |
| 51 | 6  | 0 | 2.956259  | 2.482188  | -0.395147 | 120 | 6 | 0 | -6.216111 | -2.021504 | -2.192127 |
| 52 | 6  | 0 | -3.202997 | 1.843804  | 1.073437  | 121 | 6 | 0 | -5.440395 | -2.334171 | -3.493468 |
| 53 | 6  | 0 | 0.601257  | -4.013457 | 2.061951  | 122 | 1 | 0 | -4.472845 | -2.798466 | -3.269825 |
| 54 | 6  | 0 | 1.006510  | -3.717257 | 3.366846  | 123 | 1 | 0 | -6.013151 | -3.025108 | -4.124760 |
| 55 | 6  | 0 | -0.130123 | -5.185518 | 1.824758  | 124 | 1 | 0 | -5.244798 | -1.430589 | -4.079575 |
| 56 | 6  | 0 | 0.698181  | -4.581667 | 4.419844  | 125 | 6 | 0 | -6.499780 | -3.353704 | -1.472541 |
| 57 | 1  | 0 | 1.563278  | -2.803505 | 3.561673  | 126 | 1 | 0 | -5.574937 | -3.877892 | -1.204845 |
| 58 | 6  | 0 | -0.445763 | -6.044270 | 2.875472  | 127 | 1 | 0 | -7.084140 | -3.206968 | -0.557235 |
| 59 | 1  | 0 | -0.455524 | -5.414736 | 0.813834  | 128 | 1 | 0 | -7.076521 | -4.014248 | -2.130231 |
| 60 | 6  | 0 | -0.029425 | -5.746139 | 4.176278  | 129 | 6 | 0 | -7.574383 | -1.373671 | -2.553060 |
| 61 | 1  | 0 | 1.020076  | -4.339269 | 5.429090  | 130 | 1 | 0 | -8.152661 | -1.149328 | -1.649434 |
| 62 | 1  | 0 | -1.017649 | -6.947898 | 2.681189  | 131 | 1 | 0 | -7.443478 | -0.437614 | -3.105745 |
| 63 | 1  | 0 | -0.275441 | -6.417550 | 4.994628  | 132 | 1 | 0 | -8.168923 | -2.051482 | -3.178503 |
| 64 | 6  | 0 | -3.912287 | 0.823185  | 0.231059  | 133 | 6 | 0 | 6.483634  | -2.187752 | -0.962436 |
| 65 | 6  | 0 | -4.263372 | -0.439353 | 0.768295  | 134 | 6 | 0 | 7.861775  | -1.666823 | -0.485629 |
| 66 | 6  | 0 | -4.312086 | 1.144915  | -1.091646 | 135 | 1 | 0 | 7.832850  | -1.347491 | 0.561467  |
| 67 | 6  | 0 | -4.997900 | -1.337042 | -0.020181 | 136 | 1 | 0 | 8.621912  | -2.452830 | -0.576962 |
| 68 | 6  | 0 | -5.035455 | 0.206535  | -1.831285 | 137 | 1 | 0 | 8.184257  | -0.809294 | -1.086895 |
| 69 | 6  | 0 | -5.398828 | -1.046043 | -1.324773 | 138 | 6 | 0 | 6.634113  | -2.679802 | -2.414722 |
| 70 | 1  | 0 | -5.261215 | -2.293347 | 0.416838  | 139 | 1 | 0 | 5.686513  | -3.055823 | -2.817570 |
| 71 | 1  | 0 | -5.336950 | 0.475641  | -2.839784 | 140 | 1 | 0 | 6.996778  | -1.888114 | -3.079529 |
| 72 | 6  | 0 | 3.720698  | 1.196509  | -0.536667 | 141 | 1 | 0 | 7.360118  | -3.499955 | -2.453879 |
| 73 | 6  | 0 | 4.308252  | 0.589283  | 0.601626  | 142 | 6 | 0 | 6.075244  | -3.397440 | -0.091230 |
| 74 | 6  | 0 | 3.979470  | 0.654113  | -1.818610 | 143 | 1 | 0 | 6.842341  | -4.179889 | -0.142190 |
| 75 | 6  | 0 | 5.147798  | -0.515470 | 0.428379  | 144 | 1 | 0 | 5.951027  | -3.124865 | 0.961859  |
| 76 | 6  | 0 | 4.836314  | -0.451095 | -1.931546 | 145 | 1 | 0 | 5.132213  | -3.832321 | -0.441295 |
| 77 | 6  | 0 | 5.453290  | -1.048706 | -0.830135 |     |   |   |           |           |           |
| 78 | 1  | 0 | 5.609863  | -0.948195 | 1.311749  |     |   |   |           |           |           |
| 79 | 1  | 0 | 5.036797  | -0.833093 | -2.925983 |     |   |   |           |           |           |
| 80 | 6  | 0 | 3.400293  | 1.246022  | -3.106952 |     |   |   |           |           |           |
| 81 | 6  | 0 | 4.496003  | 1.928939  | -3.951978 |     |   |   |           |           |           |
| 82 | 6  | 0 | 2.652079  | 0.203970  | -3.959765 |     |   |   |           |           |           |
| 83 | 1  | 0 | 2.667326  | 2.007208  | -2.828251 |     |   |   |           |           |           |
| 84 | 1  | 0 | 5.247055  | 1.203813  | -4.288676 |     |   |   |           |           |           |
| 85 | 1  | 0 | 5.020737  | 2.709198  | -3.390530 |     |   |   |           |           |           |
| 86 | 1  | 0 | 1.828585  | -0.237744 | -3.395731 |     |   |   |           |           |           |
| 87 | 1  | 0 | 3.315520  | -0.597070 | -4.308091 |     |   |   |           |           |           |
| 88 | 6  | 0 | 4.117203  | 1.133475  | 2.018426  |     |   |   |           |           |           |
| 89 | 6  | 0 | 3.413392  | 0.116524  | 2.936926  |     |   |   |           |           |           |

TS-2nd-(R)-reaction pathway: R-re(S)-1bd (SPINOL)

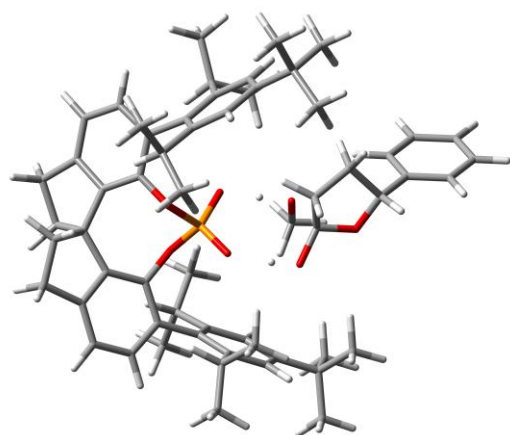

E(RB3LYP) = -3200.83603328 Hartree

Zero-point correction= 1.252076 (Hartree)  
 Thermal correction to Energy= 1.320179 (Hartree)  
 Thermal correction to Enthalpy= 1.321123 (Hartree)  
 Thermal correction to Gibbs Free Energy= 1.148001 (Hartree)  
 Sum of electronic and zero-point Energies= -3199.583957 (Hartree)  
 Sum of electronic and thermal Energies= -3199.515855 (Hartree)  
 Sum of electronic and thermal Enthalpies= -3199.514910 (Hartree)  
 Sum of electronic and thermal Free Energies= -3199.688032 (Hartree)  
 The number of Imaginary frequencies = 1

| Center Number | Atomic Number | Atomic Type | Coordinates (Angstroms) |           |           |
|---------------|---------------|-------------|-------------------------|-----------|-----------|
|               |               |             | X                       | Y         | Z         |
| 1             | 6             | 0           | -0.481027               | 2.762399  | 0.607949  |
| 2             | 8             | 0           | -0.609505               | 4.104341  | 0.503797  |
| 3             | 8             | 0           | -0.574192               | 2.232746  | -1.024019 |
| 4             | 6             | 0           | -2.002116               | 4.519125  | 0.720862  |
| 5             | 6             | 0           | -2.806295               | 3.203632  | 0.747817  |
| 6             | 6             | 0           | -1.762162               | 2.169374  | 1.179549  |
| 7             | 1             | 0           | -2.009731               | 4.986867  | 1.712023  |
| 8             | 1             | 0           | -3.190805               | 2.966654  | -0.247245 |
| 9             | 1             | 0           | -3.656403               | 3.272991  | 1.431690  |
| 10            | 1             | 0           | -1.958644               | 1.155069  | 0.831625  |
| 11            | 1             | 0           | -1.638435               | 2.139945  | 2.268063  |
| 12            | 8             | 0           | 0.714140                | 2.413020  | 1.041280  |
| 13            | 6             | 0           | 0.493846                | 2.753111  | -1.845516 |
| 14            | 1             | 0           | 0.360365                | 3.832388  | -1.925542 |
| 15            | 1             | 0           | 0.401862                | 2.284249  | -2.827395 |
| 16            | 1             | 0           | 1.466667                | 2.522104  | -1.404008 |
| 17            | 1             | 0           | -0.511061               | 1.134407  | -1.032368 |
| 18            | 1             | 0           | 0.758830                | 1.405400  | 1.182580  |
| 19            | 6             | 0           | 2.604655                | -3.504803 | -0.104008 |
| 20            | 6             | 0           | 2.738507                | -2.117668 | -0.136983 |
| 21            | 6             | 0           | 4.810077                | -2.282653 | 1.074193  |
| 22            | 6             | 0           | 4.647281                | -3.662218 | 1.199466  |
| 23            | 6             | 0           | 3.534924                | -4.264456 | 0.623681  |
| 24            | 1             | 0           | 5.685464                | -1.804244 | 1.502830  |
| 25            | 1             | 0           | 5.380123                | -4.251990 | 1.744701  |
| 26            | 6             | 0           | 3.119412                | -5.718591 | 0.667117  |
| 27            | 1             | 0           | 3.737052                | -6.333763 | -0.002509 |
| 28            | 1             | 0           | 3.216067                | -6.151801 | 1.669335  |
| 29            | 6             | 0           | 1.616456                | -4.436947 | -0.800388 |
| 30            | 6             | 0           | 1.655442                | -5.656494 | 0.183189  |
| 31            | 1             | 0           | 0.993952                | -5.444464 | 1.031026  |
| 32            | 1             | 0           | 1.310667                | -6.583440 | -0.285286 |
| 33            | 6             | 0           | 2.141332                | -4.890511 | -2.203720 |
| 34            | 1             | 0           | 2.412310                | -3.999996 | -2.782348 |
| 35            | 1             | 0           | 3.029287                | -5.526437 | -2.133304 |
| 36            | 6             | 0           | 0.932356                | -5.594080 | -2.858931 |
| 37            | 1             | 0           | 0.912252                | -6.665837 | -2.616292 |

|     |    |   |           |           |           |
|-----|----|---|-----------|-----------|-----------|
| 38  | 1  | 0 | 0.942663  | -5.520920 | -3.952636 |
| 39  | 6  | 0 | -0.242666 | -4.863849 | -2.244409 |
| 40  | 6  | 0 | 0.176618  | -4.077114 | -1.159553 |
| 41  | 6  | 0 | -1.579628 | -4.891196 | -2.622958 |
| 42  | 1  | 0 | -1.913077 | -5.518168 | -3.446333 |
| 43  | 6  | 0 | -0.733795 | -3.209093 | -0.559435 |
| 44  | 6  | 0 | -2.496730 | -4.104441 | -1.925290 |
| 45  | 1  | 0 | -3.549027 | -4.149812 | -2.187151 |
| 46  | 8  | 0 | 1.765232  | -1.361416 | -0.789569 |
| 47  | 8  | 0 | -0.288606 | -2.332222 | 0.428792  |
| 48  | 15 | 0 | 0.400057  | -0.913438 | -0.000608 |
| 49  | 8  | 0 | -0.433261 | -0.213583 | -1.070814 |
| 50  | 8  | 0 | 0.666740  | -0.177515 | 1.286093  |
| 51  | 6  | 0 | 3.852605  | -1.474334 | 0.440595  |
| 52  | 6  | 0 | -2.099999 | -3.221144 | -0.908186 |
| 53  | 6  | 0 | -2.417206 | 5.540341  | -0.310012 |
| 54  | 6  | 0 | -2.780542 | 6.828878  | 0.093678  |
| 55  | 6  | 0 | -2.460013 | 5.218624  | -1.674465 |
| 56  | 6  | 0 | -3.188411 | 7.781192  | -0.842769 |
| 57  | 1  | 0 | -2.742967 | 7.090636  | 1.148758  |
| 58  | 6  | 0 | -2.858149 | 6.170063  | -2.611356 |
| 59  | 1  | 0 | -2.179007 | 4.221146  | -2.000245 |
| 60  | 6  | 0 | -3.226060 | 7.453595  | -2.197656 |
| 61  | 1  | 0 | -3.470065 | 8.777435  | -0.512889 |
| 62  | 1  | 0 | -2.884916 | 5.909871  | -3.666127 |
| 63  | 1  | 0 | -3.539272 | 8.193144  | -2.929596 |
| 64  | 6  | 0 | -3.123565 | -2.359095 | -0.227040 |
| 65  | 6  | 0 | -3.848722 | -1.385253 | -0.956747 |
| 66  | 6  | 0 | -3.429919 | -2.561859 | 1.143256  |
| 67  | 6  | 0 | -4.851188 | -0.649608 | -0.307139 |
| 68  | 6  | 0 | -4.435147 | -1.794898 | 1.737433  |
| 69  | 6  | 0 | -5.170741 | -0.830355 | 1.039706  |
| 70  | 1  | 0 | -5.398699 | 0.082046  | -0.890187 |
| 71  | 1  | 0 | -4.659782 | -1.974110 | 2.785204  |
| 72  | 6  | 0 | 4.034723  | 0.014155  | 0.401653  |
| 73  | 6  | 0 | 4.273399  | 0.673112  | -0.825870 |
| 74  | 6  | 0 | 4.014729  | 0.771311  | 1.602679  |
| 75  | 6  | 0 | 4.444909  | 2.065172  | -0.836370 |
| 76  | 6  | 0 | 4.206732  | 2.153182  | 1.531488  |
| 77  | 6  | 0 | 4.408419  | 2.836840  | 0.327111  |
| 78  | 1  | 0 | 4.630187  | 2.545741  | -1.790904 |
| 79  | 1  | 0 | 4.188833  | 2.718021  | 2.458652  |
| 80  | 6  | 0 | 4.429108  | -0.080497 | -2.148184 |
| 81  | 6  | 0 | 3.416057  | 0.372444  | -3.215817 |
| 82  | 6  | 0 | 5.874165  | 0.028062  | -2.676245 |
| 83  | 1  | 0 | 4.241462  | -1.140567 | -1.959797 |
| 84  | 1  | 0 | 3.555209  | 1.426584  | -3.486137 |
| 85  | 1  | 0 | 2.390456  | 0.236033  | -2.860506 |
| 86  | 1  | 0 | 6.594277  | -0.336970 | -1.935421 |
| 87  | 1  | 0 | 6.139143  | 1.064891  | -2.915332 |
| 88  | 6  | 0 | 3.825709  | 0.142626  | 2.986772  |
| 89  | 6  | 0 | 5.140366  | 0.189768  | 3.793356  |
| 90  | 6  | 0 | 2.681902  | 0.783249  | 3.795803  |
| 91  | 1  | 0 | 3.558834  | -0.908004 | 2.849278  |
| 92  | 1  | 0 | 5.443969  | 1.224274  | 3.995062  |
| 93  | 1  | 0 | 5.965268  | -0.294983 | 3.259263  |
| 94  | 1  | 0 | 1.731755  | 0.682148  | 3.267811  |
| 95  | 1  | 0 | 2.861649  | 1.846207  | 3.995724  |
| 96  | 6  | 0 | -3.612677 | -1.107078 | -2.443989 |
| 97  | 6  | 0 | -4.778729 | -1.637330 | -3.304459 |
| 98  | 6  | 0 | -3.381602 | 0.385410  | -2.747166 |
| 99  | 1  | 0 | -2.703386 | -1.632379 | -2.745976 |
| 100 | 1  | 0 | -5.714441 | -1.118457 | -3.062694 |
| 101 | 1  | 0 | -4.949252 | -2.708008 | -3.150635 |
| 102 | 1  | 0 | -2.551828 | 0.781049  | -2.158294 |
| 103 | 1  | 0 | -4.273704 | 0.990324  | -2.543390 |
| 104 | 6  | 0 | -2.745990 | -3.627165 | 2.001675  |
| 105 | 6  | 0 | -2.029501 | -3.016633 | 3.221276  |
| 106 | 6  | 0 | -3.743477 | -4.721714 | 2.431762  |

|     |   |   |           |           |           |
|-----|---|---|-----------|-----------|-----------|
| 107 | 1 | 0 | -1.983429 | -4.119784 | 1.394373  |
| 108 | 1 | 0 | -2.739127 | -2.546027 | 3.912870  |
| 109 | 1 | 0 | -1.300543 | -2.262916 | 2.910359  |
| 110 | 1 | 0 | -4.221535 | -5.186806 | 1.562202  |
| 111 | 1 | 0 | -4.536840 | -4.317433 | 3.071709  |
| 112 | 1 | 0 | -1.498043 | -3.797726 | 3.778908  |
| 113 | 1 | 0 | -3.228535 | -5.507653 | 2.997810  |
| 114 | 1 | 0 | -3.138203 | 0.515884  | -3.808923 |
| 115 | 1 | 0 | -4.574120 | -1.477520 | -4.370315 |
| 116 | 1 | 0 | 2.588073  | 0.279484  | 4.765981  |
| 117 | 1 | 0 | 5.017664  | -0.316259 | 4.758850  |
| 118 | 1 | 0 | 5.995065  | -0.566356 | -3.590336 |
| 119 | 1 | 0 | 3.539602  | -0.218589 | -4.131780 |
| 120 | 6 | 0 | 4.604830  | 4.364211  | 0.331759  |
| 121 | 6 | 0 | 3.412163  | 5.045074  | 1.045083  |
| 122 | 1 | 0 | 3.335843  | 4.738151  | 2.093009  |
| 123 | 1 | 0 | 3.533689  | 6.135530  | 1.026872  |
| 124 | 1 | 0 | 2.461300  | 4.794487  | 0.563660  |
| 125 | 6 | 0 | 4.707542  | 4.947313  | -1.090574 |
| 126 | 1 | 0 | 5.570681  | 4.549641  | -1.636451 |
| 127 | 1 | 0 | 3.806462  | 4.741969  | -1.680106 |
| 128 | 1 | 0 | 4.826724  | 6.035476  | -1.036029 |
| 129 | 6 | 0 | 5.911708  | 4.705451  | 1.087273  |
| 130 | 1 | 0 | 6.066168  | 5.791502  | 1.116861  |
| 131 | 1 | 0 | 5.886549  | 4.342407  | 2.120193  |
| 132 | 1 | 0 | 6.779665  | 4.251531  | 0.595004  |
| 133 | 6 | 0 | -6.288870 | -0.046835 | 1.752711  |
| 134 | 6 | 0 | -7.378794 | -1.053541 | 2.232585  |
| 135 | 1 | 0 | -6.974362 | -1.779292 | 2.926709  |
| 136 | 1 | 0 | -8.184360 | -0.498044 | 2.748697  |
| 137 | 1 | 0 | -7.817506 | -1.574020 | 1.384985  |
| 138 | 6 | 0 | -6.958210 | 0.992935  | 0.833995  |
| 139 | 1 | 0 | -6.240424 | 1.735891  | 0.467186  |
| 140 | 1 | 0 | -7.435291 | 0.524053  | -0.033878 |
| 141 | 1 | 0 | -7.736917 | 1.529773  | 1.387930  |
| 142 | 6 | 0 | -5.706980 | 0.698685  | 2.976729  |
| 143 | 1 | 0 | -6.497128 | 1.251098  | 3.500337  |
| 144 | 1 | 0 | -5.248732 | 0.011395  | 3.694983  |
| 145 | 1 | 0 | -4.938110 | 1.417003  | 2.668108  |

Thermal correction to Energy= 1.319319 Hartree  
 Thermal correction to Enthalpy= 1.320264 Hartree  
 Thermal correction to Gibbs Free Energy= 1.147586 Hartree  
 Sum of electronic and zero-point Energies= -3199.580575 Hartree  
 Sum of electronic and thermal Energies= -3199.512550 Hartree  
 Sum of electronic and thermal Enthalpies= -3199.511605 Hartree  
 Sum of electronic and thermal Free Energies= -3199.684283 Hartree  
 The number of Imaginary frequencies = 1

| Center Number | Atomic Number | Atomic Type | Coordinates (Angstroms) |           |           |
|---------------|---------------|-------------|-------------------------|-----------|-----------|
|               |               |             | X                       | Y         | Z         |
| 1             | 6             | 0           | -0.578435               | -3.060481 | 0.725209  |
| 2             | 8             | 0           | 0.577406                | -2.549221 | -0.426729 |
| 3             | 6             | 0           | 1.892893                | -2.936393 | 0.046493  |
| 4             | 6             | 0           | 1.681809                | -3.528134 | 1.468605  |
| 5             | 6             | 0           | 0.330768                | -2.991049 | 1.937902  |
| 6             | 1             | 0           | 2.478458                | -2.011738 | 0.113851  |
| 7             | 1             | 0           | 1.656095                | -4.619779 | 1.418436  |
| 8             | 1             | 0           | 2.492110                | -3.236625 | 2.142002  |
| 9             | 1             | 0           | -0.101857               | -3.583996 | 2.748824  |
| 10            | 1             | 0           | 0.393018                | -1.946860 | 2.256777  |
| 11            | 8             | 0           | -1.611102               | -2.244827 | 0.599053  |
| 12            | 8             | 0           | -0.835459               | -4.334630 | 0.375233  |
| 13            | 6             | 0           | -1.663132               | -4.534238 | -0.784209 |
| 14            | 1             | 0           | -1.796950               | -5.613867 | -0.859249 |
| 15            | 1             | 0           | -2.624664               | -4.032299 | -0.666424 |
| 16            | 1             | 0           | -1.152626               | -4.156215 | -1.674244 |
| 17            | 1             | 0           | 0.510269                | -1.426184 | -0.641234 |
| 18            | 1             | 0           | -1.397057               | -1.324003 | 0.962170  |
| 19            | 6             | 0           | -2.026846               | 3.647149  | -0.223630 |
| 20            | 6             | 0           | -2.370220               | 2.295942  | -0.280720 |
| 21            | 6             | 0           | -4.491949               | 2.802639  | 0.733039  |
| 22            | 6             | 0           | -4.129476               | 4.138791  | 0.884356  |
| 23            | 6             | 0           | -2.885415               | 4.550202  | 0.424346  |
| 24            | 1             | 0           | -5.468452               | 2.470862  | 1.071339  |
| 25            | 1             | 0           | -4.809478               | 4.841041  | 1.360302  |
| 26            | 6             | 0           | -2.250498               | 5.918902  | 0.526699  |
| 27            | 1             | 0           | -2.700631               | 6.627111  | -0.183188 |
| 28            | 1             | 0           | -2.365826               | 6.358571  | 1.524136  |
| 29            | 6             | 0           | -0.853381               | 4.414931  | -0.824841 |
| 30            | 6             | 0           | -0.779669               | 5.623051  | 0.170978  |
| 31            | 1             | 0           | -0.237105               | 5.304861  | 1.068632  |
| 32            | 1             | 0           | -0.250301               | 6.482462  | -0.251216 |
| 33            | 6             | 0           | -1.194841               | 4.951849  | -2.254741 |
| 34            | 1             | 0           | -1.536861               | 4.113800  | -2.872719 |
| 35            | 1             | 0           | -1.990065               | 5.703394  | -2.241367 |
| 36            | 6             | 0           | 0.149046                | 5.488276  | -2.791922 |
| 37            | 1             | 0           | 0.294644                | 6.545094  | -2.528113 |
| 38            | 1             | 0           | 0.223835                | 5.425293  | -3.883772 |
| 39            | 6             | 0           | 1.155710                | 4.596872  | -2.097394 |
| 40            | 6             | 0           | 0.541661                | 3.849500  | -1.078522 |
| 41            | 6             | 0           | 2.515074                | 4.465833  | -2.351863 |
| 42            | 1             | 0           | 3.000785                | 5.068324  | -3.115535 |
| 43            | 6             | 0           | 1.270868                | 2.848949  | -0.435062 |
| 44            | 8             | 0           | -1.466613               | 1.397327  | -0.854907 |
| 45            | 8             | 0           | 0.636188                | 2.029786  | 0.500907  |
| 46            | 15            | 0           | -0.272543               | 0.749461  | 0.058248  |
| 47            | 8             | 0           | 0.488250                | -0.163001 | -0.907907 |
| 48            | 8             | 0           | -0.791134               | 0.129989  | 1.330857  |
| 49            | 6             | 0           | -3.618334               | 1.841484  | 0.194608  |
| 50            | 6             | 0           | 2.651346                | 2.686802  | -0.673082 |
| 51            | 6             | 0           | 2.563544                | -3.897305 | -0.920275 |
| 52            | 6             | 0           | 2.065882                | -4.115175 | -2.208882 |
| 53            | 6             | 0           | 3.730681                | -4.567882 | -0.526706 |
| 54            | 6             | 0           | 2.715677                | -4.990004 | -3.082383 |
| 55            | 1             | 0           | 1.170124                | -3.593260 | -2.526329 |
| 56            | 6             | 0           | 4.383393                | -5.437300 | -1.400731 |
| 57            | 1             | 0           | 4.133884                | -4.415377 | 0.471496  |

TS-1st-(S)-reaction pathway: S-anti/(S)-1bd (SPINOL)

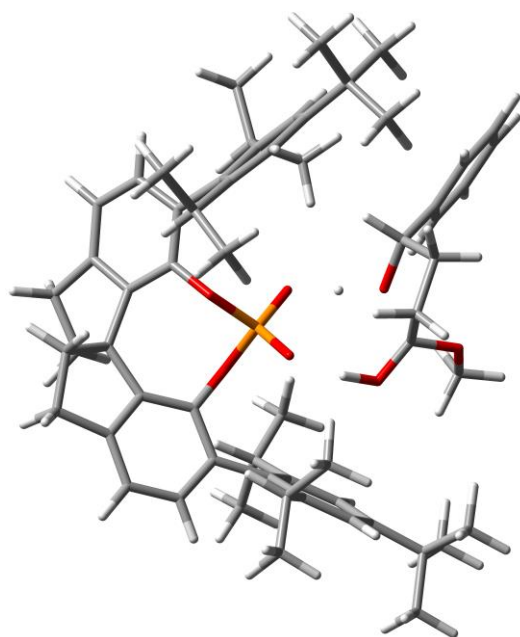

E(RB3LYP) = -3200.83186885 Hartree

Zero-point correction=

1.251294 Hartree

|     |   |   |           |           |           |     |   |   |           |           |           |
|-----|---|---|-----------|-----------|-----------|-----|---|---|-----------|-----------|-----------|
| 58  | 6 | 0 | 3.875695  | -5.653727 | -2.683321 | 127 | 1 | 0 | 8.094972  | -1.009014 | 3.092646  |
| 59  | 1 | 0 | 2.312838  | -5.148951 | -4.079316 | 128 | 1 | 0 | 7.918501  | 0.237693  | 1.841213  |
| 60  | 1 | 0 | 5.286182  | -5.948436 | -1.076802 | 129 | 6 | 0 | 5.513251  | -1.985957 | 3.029902  |
| 61  | 1 | 0 | 4.381085  | -6.332925 | -3.364515 | 130 | 1 | 0 | 5.045490  | -1.335544 | 3.776031  |
| 62  | 6 | 0 | -4.082517 | 0.413378  | 0.179874  | 131 | 1 | 0 | 4.725752  | -2.611543 | 2.592591  |
| 63  | 6 | 0 | -4.349676 | -0.255303 | -1.036201 | 132 | 1 | 0 | 6.215047  | -2.646144 | 3.554470  |
| 64  | 6 | 0 | -4.393494 | -0.234174 | 1.406733  | 133 | 6 | 0 | -6.030455 | -3.520114 | 0.224526  |
| 65  | 6 | 0 | -4.937069 | -1.528796 | -1.005659 | 134 | 6 | 0 | -5.323632 | -4.499845 | 1.190238  |
| 66  | 6 | 0 | -4.992249 | -1.495501 | 1.373153  | 135 | 1 | 0 | -5.304540 | -4.123292 | 2.217660  |
| 67  | 6 | 0 | -5.290192 | -2.169285 | 0.183429  | 136 | 1 | 0 | -5.848435 | -5.463065 | 1.203017  |
| 68  | 1 | 0 | -5.144738 | -2.010982 | -1.954558 | 137 | 1 | 0 | -4.287098 | -4.681115 | 0.886247  |
| 69  | 1 | 0 | -5.242655 | -1.963554 | 2.320656  | 138 | 6 | 0 | -6.109860 | -4.189635 | -1.161120 |
| 70  | 6 | 0 | 3.252395  | 3.546535  | -1.608342 | 139 | 1 | 0 | -6.675664 | -3.583975 | -1.877469 |
| 71  | 1 | 0 | 4.320937  | 3.454465  | -1.776847 | 140 | 1 | 0 | -5.114731 | -4.372589 | -1.583430 |
| 72  | 6 | 0 | 3.496847  | 1.648207  | 0.001730  | 141 | 1 | 0 | -6.618505 | -5.156885 | -1.076832 |
| 73  | 6 | 0 | 4.163121  | 0.668025  | -0.775295 | 142 | 6 | 0 | -7.474802 | -3.276858 | 0.726588  |
| 74  | 6 | 0 | 3.714817  | 1.684304  | 1.402665  | 143 | 1 | 0 | -8.031082 | -4.221665 | 0.775234  |
| 75  | 6 | 0 | 5.019769  | -0.242864 | -0.138206 | 144 | 1 | 0 | -7.480549 | -2.830037 | 1.726554  |
| 76  | 6 | 0 | 4.579640  | 0.751346  | 1.980447  | 145 | 1 | 0 | -8.013226 | -2.598462 | 0.054985  |
| 77  | 6 | 0 | 5.258201  | -0.222030 | 1.237631  |     |   |   |           |           |           |
| 78  | 1 | 0 | 5.524256  | -0.977223 | -0.756013 |     |   |   |           |           |           |
| 79  | 1 | 0 | 4.746274  | 0.808149  | 3.052600  |     |   |   |           |           |           |
| 80  | 6 | 0 | -4.116194 | 0.383451  | 2.782127  |     |   |   |           |           |           |
| 81  | 6 | 0 | -5.422586 | 0.687369  | 3.543612  |     |   |   |           |           |           |
| 82  | 6 | 0 | -3.191074 | -0.498274 | 3.643777  |     |   |   |           |           |           |
| 83  | 1 | 0 | -3.591964 | 1.330048  | 2.632514  |     |   |   |           |           |           |
| 84  | 1 | 0 | -5.979646 | -0.231178 | 3.764373  |     |   |   |           |           |           |
| 85  | 1 | 0 | -6.086734 | 1.343996  | 2.970985  |     |   |   |           |           |           |
| 86  | 1 | 0 | -2.225349 | -0.635952 | 3.153032  |     |   |   |           |           |           |
| 87  | 1 | 0 | -3.630416 | -1.483353 | 3.841603  |     |   |   |           |           |           |
| 88  | 6 | 0 | -4.083562 | 0.375166  | -2.403489 |     |   |   |           |           |           |
| 89  | 6 | 0 | -3.069305 | -0.441890 | -3.226300 |     |   |   |           |           |           |
| 90  | 6 | 0 | -5.391917 | 0.592617  | -3.189828 |     |   |   |           |           |           |
| 91  | 1 | 0 | -3.645035 | 1.362884  | -2.244808 |     |   |   |           |           |           |
| 92  | 1 | 0 | -3.450234 | -1.445302 | -3.453509 |     |   |   |           |           |           |
| 93  | 1 | 0 | -2.122594 | -0.546117 | -2.688355 |     |   |   |           |           |           |
| 94  | 1 | 0 | -6.098968 | 1.206332  | -2.620290 |     |   |   |           |           |           |
| 95  | 1 | 0 | -5.887990 | -0.356816 | -3.423814 |     |   |   |           |           |           |
| 96  | 6 | 0 | 3.102458  | 2.750084  | 2.312966  |     |   |   |           |           |           |
| 97  | 6 | 0 | 2.233365  | 2.136274  | 3.426897  |     |   |   |           |           |           |
| 98  | 6 | 0 | 4.191465  | 3.670596  | 2.900736  |     |   |   |           |           |           |
| 99  | 1 | 0 | 2.449826  | 3.383607  | 1.708489  |     |   |   |           |           |           |
| 100 | 1 | 0 | 2.828223  | 1.513841  | 4.106798  |     |   |   |           |           |           |
| 101 | 1 | 0 | 1.432337  | 1.521243  | 3.007039  |     |   |   |           |           |           |
| 102 | 1 | 0 | 4.784692  | 4.139922  | 2.107785  |     |   |   |           |           |           |
| 103 | 1 | 0 | 4.881043  | 3.118519  | 3.550394  |     |   |   |           |           |           |
| 104 | 6 | 0 | 4.024430  | 0.561758  | -2.297880 |     |   |   |           |           |           |
| 105 | 6 | 0 | 5.362712  | 0.856600  | -3.005722 |     |   |   |           |           |           |
| 106 | 6 | 0 | 3.463357  | -0.798342 | -2.747662 |     |   |   |           |           |           |
| 107 | 1 | 0 | 3.307286  | 1.314743  | -2.629679 |     |   |   |           |           |           |
| 108 | 1 | 0 | 6.122383  | 0.105478  | -2.758491 |     |   |   |           |           |           |
| 109 | 1 | 0 | 5.765745  | 1.835893  | -2.723176 |     |   |   |           |           |           |
| 110 | 1 | 0 | 2.466011  | -0.955944 | -2.329805 |     |   |   |           |           |           |
| 111 | 1 | 0 | 4.105174  | -1.633355 | -2.445868 |     |   |   |           |           |           |
| 112 | 1 | 0 | 1.772980  | 2.929817  | 4.028266  |     |   |   |           |           |           |
| 113 | 1 | 0 | 3.735465  | 4.467221  | 3.501299  |     |   |   |           |           |           |
| 114 | 1 | 0 | 3.379073  | -0.827164 | -3.841173 |     |   |   |           |           |           |
| 115 | 1 | 0 | 5.228907  | 0.846339  | -4.094257 |     |   |   |           |           |           |
| 116 | 1 | 0 | -5.202852 | 1.179358  | 4.498981  |     |   |   |           |           |           |
| 117 | 1 | 0 | -3.012314 | -0.016160 | 4.612945  |     |   |   |           |           |           |
| 118 | 1 | 0 | -5.187220 | 1.102383  | -4.139336 |     |   |   |           |           |           |
| 119 | 1 | 0 | -2.864665 | 0.057034  | -4.181648 |     |   |   |           |           |           |
| 120 | 6 | 0 | 6.246302  | -1.176394 | 1.935061  |     |   |   |           |           |           |
| 121 | 6 | 0 | 6.895855  | -2.171542 | 0.954663  |     |   |   |           |           |           |
| 122 | 1 | 0 | 6.151100  | -2.799960 | 0.453221  |     |   |   |           |           |           |
| 123 | 1 | 0 | 7.480325  | -1.658551 | 0.182690  |     |   |   |           |           |           |
| 124 | 1 | 0 | 7.578670  | -2.834265 | 1.498872  |     |   |   |           |           |           |
| 125 | 6 | 0 | 7.376431  | -0.347607 | 2.592540  |     |   |   |           |           |           |
| 126 | 1 | 0 | 6.987043  | 0.349944  | 3.341202  |     |   |   |           |           |           |

TS-2nd-(S)-reaction pathway: S-si/(S)-1bd (SPINOL)

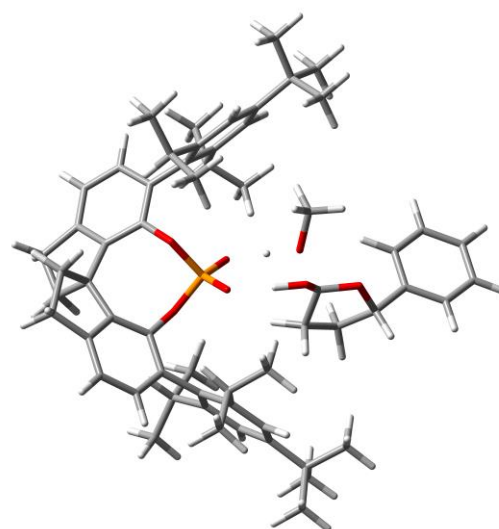

E(RB3LYP) = -3200.83440625 Hartree  
 Zero-point correction= 1.252124 Hartree  
 Thermal correction to Energy= 1.320235 Hartree  
 Thermal correction to Enthalpy= 1.321179 Hartree  
 Thermal correction to Gibbs Free Energy= 1.147774 Hartree  
 Sum of electronic and zero-point Energies= -3199.582283 Hartree  
 Sum of electronic and thermal Energies= -3199.514171 Hartree  
 Sum of electronic and thermal Enthalpies= -3199.513227 Hartree  
 Sum of electronic and thermal Free Energies= -3199.686632 Hartree  
 The number of Imaginary frequencies = 1

| Center Number | Atomic Number | Atomic Type | Coordinates (Angstroms) |           |           |
|---------------|---------------|-------------|-------------------------|-----------|-----------|
|               |               |             | X                       | Y         | Z         |
| 1             | 6             | 0           | 0.934066                | -4.152948 | 0.085119  |
| 2             | 6             | 0           | 1.587106                | -2.926048 | -0.031421 |
| 3             | 6             | 0           | 3.504784                | -3.848467 | 1.087799  |
| 4             | 6             | 0           | 2.820169                | -5.039018 | 1.326857  |
| 5             | 6             | 0           | 1.529293                | -5.181021 | 0.833487  |
| 6             | 1             | 0           | 4.529422                | -3.743422 | 1.428768  |
| 7             | 1             | 0           | 3.296804                | -5.841902 | 1.883891  |
| 8             | 6             | 0           | 0.583988                | -6.353694 | 0.980303  |
| 9             | 1             | 0           | 0.898704                | -7.205090 | 0.360633  |
| 10            | 1             | 0           | 0.532448                | -6.719779 | 2.012249  |
| 11            | 6             | 0           | -0.343926               | -4.679866 | -0.561324 |
| 12            | 6             | 0           | -0.756039               | -5.763879 | 0.490232  |



|    |    |   |           |           |           |     |   |   |           |           |           |
|----|----|---|-----------|-----------|-----------|-----|---|---|-----------|-----------|-----------|
| 13 | 1  | 0 | -1.271368 | -5.268948 | 1.321282  | 82  | 6 | 0 | -5.487214 | -2.659279 | 2.490451  |
| 14 | 1  | 0 | -1.436105 | -6.513709 | 0.074361  | 83  | 1 | 0 | -3.591923 | -2.813163 | 1.530537  |
| 15 | 6  | 0 | -0.022240 | -5.381111 | -1.925341 | 84  | 1 | 0 | -3.817377 | -0.830904 | 3.856718  |
| 16 | 1  | 0 | 0.569009  | -4.694111 | -2.541694 | 85  | 1 | 0 | -2.336210 | -1.208530 | 2.950527  |
| 17 | 1  | 0 | 0.559653  | -6.298905 | -1.797322 | 86  | 1 | 0 | -6.070937 | -2.999821 | 1.627740  |
| 18 | 6  | 0 | -1.401202 | -5.612258 | -2.576946 | 87  | 1 | 0 | -6.104849 | -1.947533 | 3.051003  |
| 19 | 1  | 0 | -1.831777 | -6.576989 | -2.273614 | 88  | 6 | 0 | -3.843038 | 0.233997  | -2.607844 |
| 20 | 1  | 0 | -1.356884 | -5.619250 | -3.672202 | 89  | 6 | 0 | -5.065247 | 0.190506  | -3.547703 |
| 21 | 6  | 0 | -2.209909 | -4.452280 | -2.039731 | 90  | 6 | 0 | -2.973062 | 1.466090  | -2.924109 |
| 22 | 6  | 0 | -1.539112 | -3.827161 | -0.976486 | 91  | 1 | 0 | -3.228059 | -0.642714 | -2.822715 |
| 23 | 6  | 0 | -3.448155 | -3.988649 | -2.466544 | 92  | 1 | 0 | -5.706399 | 1.069758  | -3.411019 |
| 24 | 1  | 0 | -3.983802 | -4.486585 | -3.271046 | 93  | 1 | 0 | -5.683630 | -0.696508 | -3.372071 |
| 25 | 6  | 0 | -2.058848 | -2.650277 | -0.437232 | 94  | 1 | 0 | -2.060897 | 1.462043  | -2.322816 |
| 26 | 6  | 0 | -3.998505 | -2.870333 | -1.843542 | 95  | 1 | 0 | -3.510658 | 2.405577  | -2.745323 |
| 27 | 1  | 0 | -4.978502 | -2.515866 | -2.147496 | 96  | 6 | 0 | 3.787624  | -1.147940 | 2.842338  |
| 28 | 8  | 0 | 0.930354  | -1.865868 | -0.658664 | 97  | 6 | 0 | 4.977617  | -1.760062 | 3.610664  |
| 29 | 8  | 0 | -1.344907 | -1.994709 | 0.563573  | 98  | 6 | 0 | 3.228567  | 0.051336  | 3.631028  |
| 30 | 15 | 0 | -0.126108 | -0.960360 | 0.209763  | 99  | 1 | 0 | 2.991228  | -1.894860 | 2.797214  |
| 31 | 8  | 0 | -0.589090 | 0.107257  | -0.779203 | 100 | 1 | 0 | 5.796325  | -1.036681 | 3.709537  |
| 32 | 8  | 0 | 0.443179  | -0.516607 | 1.529655  | 101 | 1 | 0 | 5.381947  | -2.646811 | 3.111878  |
| 33 | 6  | 0 | 2.903849  | -2.753728 | 0.443669  | 102 | 1 | 0 | 2.391855  | 0.517910  | 3.109028  |
| 34 | 6  | 0 | -3.312654 | -2.152262 | -0.848705 | 103 | 1 | 0 | 3.992564  | 0.818212  | 3.808471  |
| 35 | 6  | 0 | 3.705318  | -1.495299 | 0.269801  | 104 | 6 | 0 | 3.706723  | -1.811593 | -2.298656 |
| 36 | 6  | 0 | 4.109003  | -1.075315 | -1.019474 | 105 | 6 | 0 | 2.902866  | -0.913425 | -3.257887 |
| 37 | 6  | 0 | 4.172849  | -0.781083 | 1.405872  | 106 | 6 | 0 | 4.935225  | -2.420341 | -3.004686 |
| 38 | 6  | 0 | 4.968381  | 0.026162  | -1.146963 | 107 | 1 | 0 | 3.058669  | -2.646587 | -2.023676 |
| 39 | 6  | 0 | 5.042717  | 0.297513  | 1.217162  | 108 | 1 | 0 | 3.492632  | -0.052626 | -3.596307 |
| 40 | 6  | 0 | 5.469808  | 0.723962  | -0.046838 | 109 | 1 | 0 | 1.993137  | -0.542977 | -2.776201 |
| 41 | 1  | 0 | 5.270609  | 0.317050  | -2.146786 | 110 | 1 | 0 | 5.486675  | -3.088581 | -2.333752 |
| 42 | 1  | 0 | 5.409780  | 0.814138  | 2.099468  | 111 | 1 | 0 | 5.630698  | -1.646336 | -3.350241 |
| 43 | 6  | 0 | -3.958559 | -0.920074 | -0.285345 | 112 | 1 | 0 | 2.870578  | -0.282949 | 4.612066  |
| 44 | 6  | 0 | -4.262510 | 0.172579  | -1.135176 | 113 | 1 | 0 | 4.669179  | -2.053289 | 4.621527  |
| 45 | 6  | 0 | -4.378991 | -0.877477 | 1.068512  | 114 | 1 | 0 | 4.622923  | -3.000685 | -3.881502 |
| 46 | 6  | 0 | -4.994194 | 1.254942  | -0.623258 | 115 | 1 | 0 | 2.606810  | -1.479575 | -4.149663 |
| 47 | 6  | 0 | -5.087274 | 0.237187  | 1.526649  | 116 | 1 | 0 | -4.742076 | 0.175121  | -4.595691 |
| 48 | 6  | 0 | -5.426338 | 1.317386  | 0.703431  | 117 | 1 | 0 | -2.678999 | 1.454677  | -3.980853 |
| 49 | 1  | 0 | -5.232543 | 2.068270  | -1.299939 | 118 | 1 | 0 | -3.130595 | -2.458748 | 3.923115  |
| 50 | 1  | 0 | -5.409107 | 0.243758  | 2.564306  | 119 | 1 | 0 | -5.304996 | -3.523736 | 3.140498  |
| 51 | 6  | 0 | 0.742726  | 2.688500  | 0.933129  | 120 | 6 | 0 | 6.484818  | 1.876589  | -0.173273 |
| 52 | 8  | 0 | 0.751568  | 4.027714  | 1.138646  | 121 | 6 | 0 | 5.952324  | 3.142033  | 0.538615  |
| 53 | 8  | 0 | -0.642853 | 2.434651  | 0.001003  | 122 | 1 | 0 | 5.746755  | 2.962732  | 1.598715  |
| 54 | 1  | 0 | 0.539426  | 1.024322  | 1.892504  | 123 | 1 | 0 | 6.687639  | 3.953582  | 0.475234  |
| 55 | 6  | 0 | 1.609082  | 4.704200  | 0.159948  | 124 | 1 | 0 | 5.024328  | 3.492989  | 0.071323  |
| 56 | 6  | 0 | 1.968635  | 3.613316  | -0.869153 | 125 | 6 | 0 | 6.778140  | 2.244476  | -1.640246 |
| 57 | 6  | 0 | 1.846026  | 2.324145  | -0.052111 | 126 | 1 | 0 | 7.222557  | 1.407706  | -2.190301 |
| 58 | 1  | 0 | 2.503825  | 5.005323  | 0.717229  | 127 | 1 | 0 | 5.871563  | 2.557258  | -2.171495 |
| 59 | 1  | 0 | 1.252875  | 3.617211  | -1.695569 | 128 | 1 | 0 | 7.489342  | 3.077586  | -1.678090 |
| 60 | 1  | 0 | 2.967434  | 3.769966  | -1.285104 | 129 | 6 | 0 | 7.815570  | 1.447730  | 0.491421  |
| 61 | 1  | 0 | 1.618911  | 1.437550  | -0.643669 | 130 | 1 | 0 | 8.559563  | 2.250661  | 0.415467  |
| 62 | 1  | 0 | 2.749024  | 2.120144  | 0.532718  | 131 | 1 | 0 | 7.680402  | 1.214477  | 1.552741  |
| 63 | 8  | 0 | 0.551517  | 2.026176  | 2.064568  | 132 | 1 | 0 | 8.225586  | 0.556233  | 0.003569  |
| 64 | 6  | 0 | -1.860719 | 2.708312  | 0.731596  | 133 | 6 | 0 | -6.258538 | 2.486014  | 1.264821  |
| 65 | 1  | 0 | -2.691803 | 2.547769  | 0.045636  | 134 | 6 | 0 | -5.521905 | 3.127589  | 2.464259  |
| 66 | 1  | 0 | -1.950684 | 2.044559  | 1.593941  | 135 | 1 | 0 | -6.119368 | 3.944854  | 2.886778  |
| 67 | 1  | 0 | -1.819667 | 3.748029  | 1.058311  | 136 | 1 | 0 | -5.334621 | 2.404237  | 3.264238  |
| 68 | 6  | 0 | 0.925221  | 5.935467  | -0.382531 | 137 | 1 | 0 | -4.554836 | 3.542937  | 2.156909  |
| 69 | 6  | 0 | -0.300518 | 5.844615  | -1.057743 | 138 | 6 | 0 | -6.512695 | 3.585704  | 0.216205  |
| 70 | 6  | 0 | 1.524969  | 7.189570  | -0.232495 | 139 | 1 | 0 | -5.577840 | 4.025132  | -0.150693 |
| 71 | 6  | 0 | -0.908899 | 6.988058  | -1.571316 | 140 | 1 | 0 | -7.072624 | 3.206315  | -0.645988 |
| 72 | 1  | 0 | -0.776377 | 4.875314  | -1.176465 | 141 | 1 | 0 | -7.103205 | 4.393346  | 0.663573  |
| 73 | 6  | 0 | 0.921073  | 8.335630  | -0.754277 | 142 | 6 | 0 | -7.631112 | 1.951114  | 1.739867  |
| 74 | 1  | 0 | 2.471129  | 7.271377  | 0.297897  | 143 | 1 | 0 | -8.240690 | 2.767846  | 2.146195  |
| 75 | 6  | 0 | -0.298310 | 8.236827  | -1.423430 | 144 | 1 | 0 | -8.182115 | 1.496025  | 0.908935  |
| 76 | 1  | 0 | -1.860247 | 6.905947  | -2.090243 | 145 | 1 | 0 | -7.522907 | 1.193380  | 2.522716  |
| 77 | 1  | 0 | 1.400731  | 9.302888  | -0.631390 |     |   |   |           |           |           |
| 78 | 1  | 0 | -0.773332 | 9.126988  | -1.826942 |     |   |   |           |           |           |
| 79 | 1  | 0 | -0.640933 | 1.387418  | -0.339615 |     |   |   |           |           |           |
| 80 | 6  | 0 | -4.150653 | -2.030200 | 2.047460  |     |   |   |           |           |           |
| 81 | 6  | 0 | -3.308223 | -1.600457 | 3.263585  |     |   |   |           |           |           |

TS-1st-(S)-reaction pathway: S-syn/(S)-1bd (SPINOL)

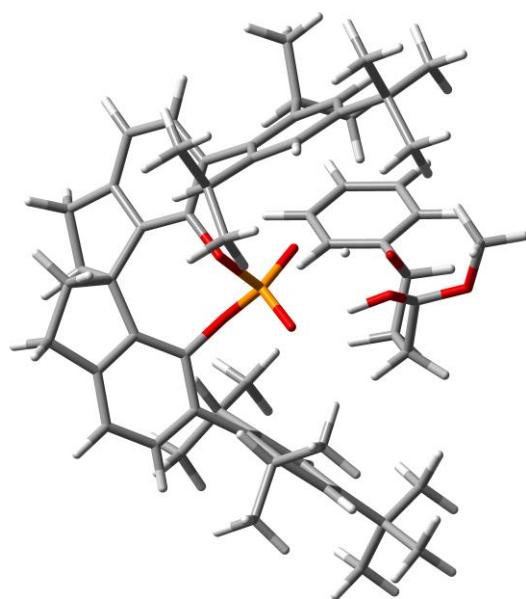

E(RB3LYP) = -3200.83161891 Hartree  
 Zero-point correction= 1.251140 Hartree  
 Thermal correction to Energy= 1.319388 Hartree  
 Thermal correction to Enthalpy= 1.320332 Hartree  
 Thermal correction to Gibbs Free Energy= 1.146183 Hartree  
 Sum of electronic and zero-point Energies= -3199.580479 Hartree  
 Sum of electronic and thermal Energies= -3199.512231 Hartree  
 Sum of electronic and thermal Enthalpies= -3199.511287 Hartree  
 Sum of electronic and thermal Free Energies= -3199.685436 Hartree  
 The number of Imaginary frequencies = 1

| Center Number | Atomic Number | Atomic Type | Coordinates (Angstroms) |           |           |
|---------------|---------------|-------------|-------------------------|-----------|-----------|
|               |               |             | X                       | Y         | Z         |
| 1             | 6             | 0           | -1.353903               | 3.271555  | 1.243717  |
| 2             | 6             | 0           | -1.946840               | 2.216709  | 0.554163  |
| 3             | 6             | 0           | -3.864148               | 2.352166  | 1.991677  |
| 4             | 6             | 0           | -3.229370               | 3.314243  | 2.778199  |
| 5             | 6             | 0           | -1.968920               | 3.765195  | 2.404463  |
| 6             | 1             | 0           | -4.868737               | 2.032022  | 2.247369  |
| 7             | 1             | 0           | -3.724588               | 3.710122  | 3.661554  |
| 8             | 6             | 0           | -1.079848               | 4.784108  | 3.085646  |
| 9             | 1             | 0           | -1.472089               | 5.803907  | 2.967584  |
| 10            | 1             | 0           | -0.991844               | 4.606404  | 4.163854  |
| 11            | 6             | 0           | -0.142585               | 4.134912  | 0.907057  |
| 12            | 6             | 0           | 0.263903                | 4.607446  | 2.342747  |
| 13            | 1             | 0           | 0.852714                | 3.815843  | 2.820410  |
| 14            | 1             | 0           | 0.875035                | 5.515362  | 2.328091  |
| 15            | 6             | 0           | -0.582789               | 5.377659  | 0.058903  |
| 16            | 1             | 0           | -1.180716               | 5.027611  | -0.790333 |
| 17            | 1             | 0           | -1.197129               | 6.078299  | 0.632441  |
| 18            | 6             | 0           | 0.737229                | 5.989850  | -0.450785 |
| 19            | 1             | 0           | 1.144922                | 6.717662  | 0.265039  |
| 20            | 1             | 0           | 0.619856                | 6.518525  | -1.403725 |
| 21            | 6             | 0           | 1.630111                | 4.775111  | -0.569881 |
| 22            | 6             | 0           | 1.067434                | 3.674499  | 0.097054  |
| 23            | 6             | 0           | 2.846921                | 4.659802  | -1.229883 |
| 24            | 1             | 0           | 3.292457                | 5.515103  | -1.731809 |
| 25            | 6             | 0           | 1.682656                | 2.426251  | -0.008562 |
| 26            | 8             | 0           | -1.257119               | 1.637002  | -0.511996 |
| 27            | 8             | 0           | 1.068539                | 1.319215  | 0.582230  |
| 28            | 15            | 0           | -0.109246               | 0.512362  | -0.226608 |
| 29            | 8             | 0           | 0.356777                | 0.014979  | -1.568129 |
| 30            | 8             | 0           | -0.609003               | -0.512411 | 0.791255  |

|    |   |   |           |           |           |
|----|---|---|-----------|-----------|-----------|
| 31 | 6 | 0 | -3.236017 | 1.752994  | 0.886913  |
| 32 | 6 | 0 | 2.925025  | 2.278365  | -0.659070 |
| 33 | 6 | 0 | -3.953470 | 0.694806  | 0.099855  |
| 34 | 6 | 0 | -4.315858 | 0.933702  | -1.251352 |
| 35 | 6 | 0 | -4.340880 | -0.523225 | 0.710161  |
| 36 | 6 | 0 | -5.028384 | -0.044741 | -1.948116 |
| 37 | 6 | 0 | -5.064534 | -1.462916 | -0.037927 |
| 38 | 6 | 0 | -5.418508 | -1.258427 | -1.371707 |
| 39 | 1 | 0 | -5.296129 | 0.158883  | -2.981166 |
| 40 | 1 | 0 | -5.351281 | -2.385463 | 0.453172  |
| 41 | 6 | 0 | 3.494438  | 3.425532  | -1.236827 |
| 42 | 1 | 0 | 4.461232  | 3.329136  | -1.720883 |
| 43 | 6 | 0 | 3.694367  | 0.989334  | -0.737172 |
| 44 | 6 | 0 | 3.884651  | 0.340981  | -1.979626 |
| 45 | 6 | 0 | 4.355864  | 0.491993  | 0.415355  |
| 46 | 6 | 0 | 4.735556  | -0.773835 | -2.042597 |
| 47 | 6 | 0 | 5.189461  | -0.622741 | 0.292298  |
| 48 | 6 | 0 | 5.410576  | -1.274719 | -0.928548 |
| 49 | 1 | 0 | 4.878488  | -1.245042 | -3.008098 |
| 50 | 1 | 0 | 5.707835  | -0.976451 | 1.178243  |
| 51 | 6 | 0 | 0.194476  | -3.240741 | -1.101530 |
| 52 | 8 | 0 | -0.352229 | -2.913159 | 0.454650  |
| 53 | 6 | 0 | 0.688201  | -3.503088 | 1.301317  |
| 54 | 6 | 0 | 1.708869  | -3.084070 | -0.887987 |
| 55 | 1 | 0 | 2.193639  | -3.929206 | -1.383272 |
| 56 | 1 | 0 | 2.045099  | -2.165433 | -1.370620 |
| 57 | 8 | 0 | -0.465166 | -2.425727 | -1.913822 |
| 58 | 8 | 0 | -0.129132 | -4.544372 | -1.274023 |
| 59 | 6 | 0 | -1.508142 | -4.823456 | -1.577239 |
| 60 | 1 | 0 | -1.593025 | -5.910705 | -1.551148 |
| 61 | 1 | 0 | -1.767476 | -4.445956 | -2.568780 |
| 62 | 1 | 0 | -2.162613 | -4.372977 | -0.825982 |
| 63 | 1 | 0 | -0.461269 | -1.787469 | 0.597589  |
| 64 | 1 | 0 | -0.132809 | -1.469502 | -1.851555 |
| 65 | 6 | 0 | 0.517105  | -3.193464 | 2.769828  |
| 66 | 6 | 0 | 0.654626  | -1.898191 | 3.291303  |
| 67 | 6 | 0 | 0.243091  | -4.249722 | 3.648359  |
| 68 | 6 | 0 | 0.517967  | -1.674671 | 4.661087  |
| 69 | 1 | 0 | 0.832299  | -1.058585 | 2.628532  |
| 70 | 6 | 0 | 0.114548  | -4.027025 | 5.019767  |
| 71 | 1 | 0 | 0.131305  | -5.257352 | 3.254339  |
| 72 | 6 | 0 | 0.251939  | -2.735819 | 5.529390  |
| 73 | 1 | 0 | 0.618419  | -0.665037 | 5.049745  |
| 74 | 1 | 0 | -0.095288 | -4.859841 | 5.685550  |
| 75 | 1 | 0 | 0.150152  | -2.555981 | 6.596367  |
| 76 | 1 | 0 | 0.560882  | -4.579519 | 1.158045  |
| 77 | 6 | 0 | 1.992399  | -3.053360 | 0.630784  |
| 78 | 1 | 0 | 2.824995  | -3.700617 | 0.919284  |
| 79 | 1 | 0 | 2.246832  | -2.036899 | 0.944258  |
| 80 | 6 | 0 | 3.244882  | 0.832633  | -3.281266 |
| 81 | 6 | 0 | 4.295188  | 1.490991  | -4.200893 |
| 82 | 6 | 0 | 2.503308  | -0.277406 | -4.049537 |
| 83 | 1 | 0 | 2.498818  | 1.588926  | -3.024207 |
| 84 | 1 | 0 | 5.058935  | 0.766548  | -4.509567 |
| 85 | 1 | 0 | 4.809890  | 2.322437  | -3.708291 |
| 86 | 1 | 0 | 1.719342  | -0.720999 | -3.433469 |
| 87 | 1 | 0 | 3.181444  | -1.069976 | -4.388529 |
| 88 | 6 | 0 | 4.275031  | 1.212490  | 1.763175  |
| 89 | 6 | 0 | 4.180523  | 0.266839  | 2.972809  |
| 90 | 6 | 0 | 5.467970  | 2.178085  | 1.923659  |
| 91 | 1 | 0 | 3.365946  | 1.818791  | 1.768828  |
| 92 | 1 | 0 | 5.100061  | -0.310603 | 3.124060  |
| 93 | 1 | 0 | 3.351059  | -0.440579 | 2.869919  |
| 94 | 1 | 0 | 5.499138  | 2.908374  | 1.108138  |
| 95 | 1 | 0 | 6.417919  | 1.629700  | 1.921035  |
| 96 | 6 | 0 | -4.015248 | 2.245780  | -1.978363 |
| 97 | 6 | 0 | -3.164726 | 2.029646  | -3.244525 |
| 98 | 6 | 0 | -5.314866 | 3.009083  | -2.305271 |
| 99 | 1 | 0 | -3.437261 | 2.886461  | -1.308533 |

|     |   |   |           |           |           |
|-----|---|---|-----------|-----------|-----------|
| 100 | 1 | 0 | -3.702217 | 1.439822  | -3.996929 |
| 101 | 1 | 0 | -2.231379 | 1.511997  | -3.006140 |
| 102 | 1 | 0 | -5.899602 | 3.203181  | -1.398937 |
| 103 | 1 | 0 | -5.951047 | 2.444864  | -2.997495 |
| 104 | 6 | 0 | -4.018499 | -0.872119 | 2.165598  |
| 105 | 6 | 0 | -5.275994 | -0.791862 | 3.056491  |
| 106 | 6 | 0 | -3.369812 | -2.261087 | 2.316674  |
| 107 | 1 | 0 | -3.293268 | -0.142688 | 2.535481  |
| 108 | 1 | 0 | -6.027604 | -1.524821 | 2.738534  |
| 109 | 1 | 0 | -5.747597 | 0.195771  | 3.021099  |
| 110 | 1 | 0 | -2.509979 | -2.373053 | 1.654016  |
| 111 | 1 | 0 | -4.078373 | -3.069207 | 2.096633  |
| 112 | 1 | 0 | 2.027878  | 0.145898  | -4.942586 |
| 113 | 1 | 0 | 3.818345  | 1.880066  | -5.108754 |
| 114 | 1 | 0 | 5.397301  | 2.728349  | 2.870159  |
| 115 | 1 | 0 | 4.014552  | 0.848884  | 3.887105  |
| 116 | 1 | 0 | -2.914604 | 2.994750  | -3.702596 |
| 117 | 1 | 0 | -5.085334 | 3.973378  | -2.775393 |
| 118 | 1 | 0 | -3.024738 | -2.403469 | 3.347598  |
| 119 | 1 | 0 | -5.020802 | -1.007268 | 4.101511  |
| 120 | 6 | 0 | 6.396737  | -2.456440 | -1.006071 |
| 121 | 6 | 0 | 5.954725  | -3.582072 | -0.042171 |
| 122 | 1 | 0 | 6.673851  | -4.410191 | -0.066180 |
| 123 | 1 | 0 | 5.885052  | -3.231829 | 0.992879  |
| 124 | 1 | 0 | 4.974322  | -3.979754 | -0.329358 |
| 125 | 6 | 0 | 6.490199  | -3.053635 | -2.423156 |
| 126 | 1 | 0 | 5.522091  | -3.431595 | -2.771381 |
| 127 | 1 | 0 | 6.851972  | -2.320200 | -3.152347 |
| 128 | 1 | 0 | 7.193775  | -3.894037 | -2.424386 |
| 129 | 6 | 0 | 7.807294  | -1.966154 | -0.598270 |
| 130 | 1 | 0 | 7.820746  | -1.571361 | 0.422986  |
| 131 | 1 | 0 | 8.529085  | -2.790985 | -0.648207 |
| 132 | 1 | 0 | 8.152791  | -1.170583 | -1.268130 |
| 133 | 6 | 0 | -6.201390 | -2.291646 | -2.202669 |
| 134 | 6 | 0 | -7.530501 | -1.666063 | -2.688620 |
| 135 | 1 | 0 | -7.360670 | -0.777175 | -3.304904 |
| 136 | 1 | 0 | -8.096033 | -2.387575 | -3.291617 |
| 137 | 1 | 0 | -8.156054 | -1.368446 | -1.839204 |
| 138 | 6 | 0 | -5.356081 | -2.710831 | -3.428898 |
| 139 | 1 | 0 | -4.406401 | -3.158637 | -3.113733 |
| 140 | 1 | 0 | -5.898098 | -3.447854 | -4.034847 |
| 141 | 1 | 0 | -5.120768 | -1.857005 | -4.072372 |
| 142 | 6 | 0 | -6.538465 | -3.560998 | -1.397582 |
| 143 | 1 | 0 | -5.635006 | -4.072284 | -1.045704 |
| 144 | 1 | 0 | -7.164374 | -3.337439 | -0.526220 |
| 145 | 1 | 0 | -7.091854 | -4.264465 | -2.030372 |

Zero-point correction= 1.252032 Hartree  
 Thermal correction to Energy= 1.320402 Hartree  
 Thermal correction to Enthalpy= 1.321346 Hartree  
 Thermal correction to Gibbs Free Energy= 1.146654 Hartree  
 Sum of electronic and zero-point Energies= -3199.583567 Hartree  
 Sum of electronic and thermal Energies= -3199.515197 Hartree  
 Sum of electronic and thermal Enthalpies= -3199.514252 Hartree  
 Sum of electronic and thermal Free Energies= -3199.688944 Hartree  
 The number of Imaginary frequencies = 1

| Center Number | Atomic Number | Atomic Type | Coordinates (Angstroms) |           |           |
|---------------|---------------|-------------|-------------------------|-----------|-----------|
|               |               |             | X                       | Y         | Z         |
| 1             | 6             | 0           | -1.775490               | 2.115232  | -0.037094 |
| 2             | 8             | 0           | -2.565403               | 3.173675  | -0.325564 |
| 3             | 8             | 0           | -1.443924               | 1.465413  | -1.609214 |
| 4             | 6             | 0           | -3.940234               | 2.711917  | -0.468348 |
| 5             | 6             | 0           | -4.031878               | 1.569189  | 0.563721  |
| 6             | 6             | 0           | -2.608173               | 0.979541  | 0.574713  |
| 7             | 1             | 0           | -4.049807               | 2.311400  | -1.483365 |
| 8             | 1             | 0           | -4.291552               | 1.986098  | 1.541807  |
| 9             | 1             | 0           | -4.799058               | 0.840039  | 0.291526  |
| 10            | 1             | 0           | -2.236112               | 0.764047  | 1.578306  |
| 11            | 1             | 0           | -2.526660               | 0.062978  | -0.011010 |
| 12            | 8             | 0           | -0.617750               | 2.487897  | 0.459502  |
| 13            | 6             | 0           | -0.727728               | 2.381051  | -2.463200 |
| 14            | 1             | 0           | 0.193093                | 2.719543  | -1.980584 |
| 15            | 1             | 0           | -0.498194               | 1.849111  | -3.388915 |
| 16            | 1             | 0           | -1.381534               | 3.230023  | -2.666718 |
| 17            | 1             | 0           | -0.085870               | 1.666827  | 0.757044  |
| 18            | 1             | 0           | -0.834542               | 0.577814  | -1.466906 |
| 19            | 6             | 0           | 2.276057                | -3.633628 | -0.685034 |
| 20            | 6             | 0           | 0.992312                | -3.248740 | -0.300070 |
| 21            | 6             | 0           | 0.058687                | -5.041675 | -1.601029 |
| 22            | 6             | 0           | 1.322421                | -5.362586 | -2.097190 |
| 23            | 6             | 0           | 2.425085                | -4.647881 | -1.645032 |
| 24            | 1             | 0           | -0.802880               | -5.622260 | -1.914713 |
| 25            | 1             | 0           | 1.437323                | -6.165072 | -2.821779 |
| 26            | 6             | 0           | 3.876050                | -4.788641 | -2.052593 |
| 27            | 1             | 0           | 4.325515                | -5.699960 | -1.633748 |
| 28            | 1             | 0           | 3.999036                | -4.850330 | -3.140121 |
| 29            | 6             | 0           | 3.654630                | -3.209948 | -0.181210 |
| 30            | 6             | 0           | 4.515175                | -3.517518 | -1.452109 |
| 31            | 1             | 0           | 4.414686                | -2.682684 | -2.155081 |
| 32            | 1             | 0           | 5.578474                | -3.632890 | -1.219952 |
| 33            | 6             | 0           | 4.125862                | -4.131755 | 0.995563  |
| 34            | 1             | 0           | 3.334809                | -4.165030 | 1.753536  |
| 35            | 1             | 0           | 4.320526                | -5.158677 | 0.671307  |
| 36            | 6             | 0           | 5.369759                | -3.421752 | 1.570988  |
| 37            | 1             | 0           | 6.286815                | -3.739163 | 1.054685  |
| 38            | 1             | 0           | 5.521250                | -3.630615 | 2.636310  |
| 39            | 6             | 0           | 5.060516                | -1.964517 | 1.306002  |
| 40            | 6             | 0           | 3.990332                | -1.841999 | 0.405650  |
| 41            | 6             | 0           | 5.673688                | -0.834851 | 1.835010  |
| 42            | 1             | 0           | 6.517788                | -0.925694 | 2.514295  |
| 43            | 6             | 0           | 3.462088                | -0.579261 | 0.144789  |
| 44            | 6             | 0           | 5.185436                | 0.424973  | 1.487957  |
| 45            | 1             | 0           | 5.668300                | 1.314409  | 1.881264  |
| 46            | 8             | 0           | 0.832461                | -2.154138 | 0.548909  |
| 47            | 8             | 0           | 2.349350                | -0.475985 | -0.687035 |
| 48            | 15            | 0           | 0.837759                | -0.642456 | -0.074823 |
| 49            | 8             | 0           | 0.571702                | 0.281639  | 1.087085  |
| 50            | 8             | 0           | -0.063396               | -0.549646 | -1.299467 |
| 51            | 6             | 0           | -0.146530               | -3.963298 | -0.725424 |
| 52            | 6             | 0           | 4.054041                | 0.587055  | 0.671999  |
| 53            | 6             | 0           | -4.888606               | 3.864675  | -0.261887 |
| 54            | 6             | 0           | -6.054252               | 3.948074  | -1.030655 |
| 55            | 6             | 0           | -4.648411               | 4.831585  | 0.722885  |
| 56            | 6             | 0           | -6.976099               | 4.973155  | -0.812166 |

TS-2nd-(S)-reaction pathway: S-re/(S)-1bd (SPINOL)

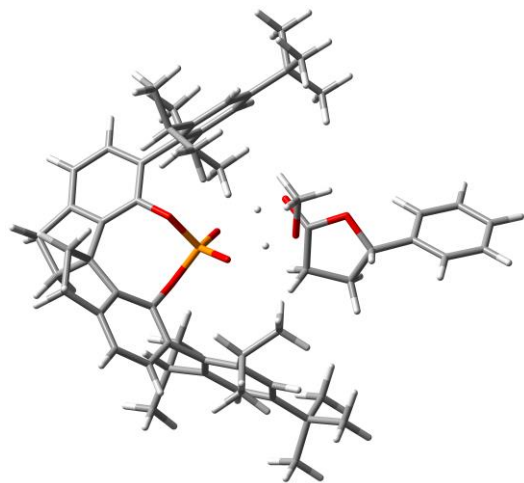

E(RB3LYP) = -3200.83559846 Hartree

|     |   |   |           |           |           |     |   |   |           |           |           |
|-----|---|---|-----------|-----------|-----------|-----|---|---|-----------|-----------|-----------|
| 57  | 1 | 0 | -6.241928 | 3.208176  | -1.805886 | 126 | 1 | 0 | -5.076526 | -2.325050 | 3.120018  |
| 58  | 6 | 0 | -5.563529 | 5.862117  | 0.933313  | 127 | 1 | 0 | -5.332752 | -1.021310 | 1.953501  |
| 59  | 1 | 0 | -3.734254 | 4.783807  | 1.306889  | 128 | 1 | 0 | -6.721963 | -1.879726 | 2.646736  |
| 60  | 6 | 0 | -6.731669 | 5.933263  | 0.170245  | 129 | 6 | 0 | -6.198471 | -4.382457 | 1.614090  |
| 61  | 1 | 0 | -7.878229 | 5.025740  | -1.415611 | 130 | 1 | 0 | -7.227504 | -4.279453 | 1.980898  |
| 62  | 1 | 0 | -5.363399 | 6.612522  | 1.693412  | 131 | 1 | 0 | -6.197021 | -5.124084 | 0.807213  |
| 63  | 1 | 0 | -7.443950 | 6.736755  | 0.336992  | 132 | 1 | 0 | -5.588853 | -4.779430 | 2.432464  |
| 64  | 6 | 0 | -1.536770 | -3.639836 | -0.258298 | 133 | 6 | 0 | 1.951585  | 5.994140  | -0.336141 |
| 65  | 6 | 0 | -1.891865 | -3.826583 | 1.102287  | 134 | 6 | 0 | 1.933848  | 6.382453  | -1.826940 |
| 66  | 6 | 0 | -2.531566 | -3.226727 | -1.178284 | 135 | 1 | 0 | 1.514940  | 7.388729  | -1.941907 |
| 67  | 6 | 0 | -3.212191 | -3.600729 | 1.499273  | 136 | 1 | 0 | 2.940351  | 6.394415  | -2.260337 |
| 68  | 6 | 0 | -3.841736 | -3.018248 | -0.721120 | 137 | 1 | 0 | 1.315922  | 5.696674  | -2.418195 |
| 69  | 6 | 0 | -4.217016 | -3.200615 | 0.611401  | 138 | 6 | 0 | 0.503043  | 6.084834  | 0.200841  |
| 70  | 1 | 0 | -3.464417 | -3.763593 | 2.543383  | 139 | 1 | 0 | -0.147601 | 5.346781  | -0.279631 |
| 71  | 1 | 0 | -4.587418 | -2.714653 | -1.447019 | 140 | 1 | 0 | 0.457291  | 5.904828  | 1.279637  |
| 72  | 6 | 0 | 3.512531  | 1.959630  | 0.401669  | 141 | 1 | 0 | 0.091786  | 7.084765  | 0.013358  |
| 73  | 6 | 0 | 2.992477  | 2.746180  | 1.463707  | 142 | 6 | 0 | 2.838297  | 7.014976  | 0.416629  |
| 74  | 6 | 0 | 3.549843  | 2.501659  | -0.903323 | 143 | 1 | 0 | 2.453938  | 8.033541  | 0.278593  |
| 75  | 6 | 0 | 2.512326  | 4.027377  | 1.181755  | 144 | 1 | 0 | 2.865009  | 6.809795  | 1.492050  |
| 76  | 6 | 0 | 3.039690  | 3.788760  | -1.127933 | 145 | 1 | 0 | 3.869551  | 6.987229  | 0.045963  |
| 77  | 6 | 0 | 2.505876  | 4.576116  | -0.105644 |     |   |   |           |           |           |
| 78  | 1 | 0 | 2.118589  | 4.615860  | 2.005065  |     |   |   |           |           |           |
| 79  | 1 | 0 | 3.084149  | 4.182122  | -2.137670 |     |   |   |           |           |           |
| 80  | 6 | 0 | -2.256428 | -3.026531 | -2.671469 |     |   |   |           |           |           |
| 81  | 6 | 0 | -2.886962 | -4.156928 | -3.512056 |     |   |   |           |           |           |
| 82  | 6 | 0 | -2.740756 | -1.662365 | -3.197671 |     |   |   |           |           |           |
| 83  | 1 | 0 | -1.174379 | -3.055374 | -2.821581 |     |   |   |           |           |           |
| 84  | 1 | 0 | -3.980106 | -4.151947 | -3.420685 |     |   |   |           |           |           |
| 85  | 1 | 0 | -2.537030 | -5.146393 | -3.200232 |     |   |   |           |           |           |
| 86  | 1 | 0 | -2.302896 | -0.839704 | -2.629161 |     |   |   |           |           |           |
| 87  | 1 | 0 | -3.832905 | -1.569142 | -3.157109 |     |   |   |           |           |           |
| 88  | 6 | 0 | -0.904629 | -4.320858 | 2.160869  |     |   |   |           |           |           |
| 89  | 6 | 0 | -0.733483 | -3.308527 | 3.309544  |     |   |   |           |           |           |
| 90  | 6 | 0 | -1.307841 | -5.709319 | 2.696921  |     |   |   |           |           |           |
| 91  | 1 | 0 | 0.073342  | -4.439606 | 1.689165  |     |   |   |           |           |           |
| 92  | 1 | 0 | -1.667765 | -3.168487 | 3.867115  |     |   |   |           |           |           |
| 93  | 1 | 0 | -0.410634 | -2.335548 | 2.928270  |     |   |   |           |           |           |
| 94  | 1 | 0 | -1.389027 | -6.440015 | 1.884249  |     |   |   |           |           |           |
| 95  | 1 | 0 | -2.273485 | -5.678848 | 3.215568  |     |   |   |           |           |           |
| 96  | 6 | 0 | 4.193059  | 1.769389  | -2.082405 |     |   |   |           |           |           |
| 97  | 6 | 0 | 3.215673  | 1.552427  | -3.252574 |     |   |   |           |           |           |
| 98  | 6 | 0 | 5.467357  | 2.499135  | -2.554197 |     |   |   |           |           |           |
| 99  | 1 | 0 | 4.505575  | 0.779984  | -1.739533 |     |   |   |           |           |           |
| 100 | 1 | 0 | 2.878240  | 2.504361  | -3.681070 |     |   |   |           |           |           |
| 101 | 1 | 0 | 2.338335  | 0.986107  | -2.926612 |     |   |   |           |           |           |
| 102 | 1 | 0 | 6.184440  | 2.613318  | -1.733560 |     |   |   |           |           |           |
| 103 | 1 | 0 | 5.239458  | 3.500384  | -2.938915 |     |   |   |           |           |           |
| 104 | 6 | 0 | 2.954350  | 2.271029  | 2.919636  |     |   |   |           |           |           |
| 105 | 6 | 0 | 3.973058  | 3.049212  | 3.778379  |     |   |   |           |           |           |
| 106 | 6 | 0 | 1.550905  | 2.357002  | 3.549285  |     |   |   |           |           |           |
| 107 | 1 | 0 | 3.240111  | 1.216734  | 2.941109  |     |   |   |           |           |           |
| 108 | 1 | 0 | 3.719484  | 4.115326  | 3.825029  |     |   |   |           |           |           |
| 109 | 1 | 0 | 4.989572  | 2.972060  | 3.376512  |     |   |   |           |           |           |
| 110 | 1 | 0 | 0.840107  | 1.743798  | 2.991762  |     |   |   |           |           |           |
| 111 | 1 | 0 | 1.175437  | 3.386596  | 3.583564  |     |   |   |           |           |           |
| 112 | 1 | 0 | 1.584796  | 1.986705  | 4.581538  |     |   |   |           |           |           |
| 113 | 1 | 0 | 3.984387  | 2.663810  | 4.805341  |     |   |   |           |           |           |
| 114 | 1 | 0 | 3.704818  | 0.988077  | -4.056189 |     |   |   |           |           |           |
| 115 | 1 | 0 | 5.957122  | 1.936324  | -3.358490 |     |   |   |           |           |           |
| 116 | 1 | 0 | -2.445492 | -1.543751 | -4.247496 |     |   |   |           |           |           |
| 117 | 1 | 0 | -2.640004 | -4.030434 | -4.573377 |     |   |   |           |           |           |
| 118 | 1 | 0 | -0.559603 | -6.075791 | 3.410407  |     |   |   |           |           |           |
| 119 | 1 | 0 | 0.022103  | -3.665380 | 4.020348  |     |   |   |           |           |           |
| 120 | 6 | 0 | -5.662649 | -3.019851 | 1.111918  |     |   |   |           |           |           |
| 121 | 6 | 0 | -6.609212 | -2.511614 | 0.007842  |     |   |   |           |           |           |
| 122 | 1 | 0 | -6.679052 | -3.216779 | -0.827862 |     |   |   |           |           |           |
| 123 | 1 | 0 | -7.618483 | -2.382783 | 0.415296  |     |   |   |           |           |           |
| 124 | 1 | 0 | -6.286781 | -1.542729 | -0.391903 |     |   |   |           |           |           |
| 125 | 6 | 0 | -5.696468 | -2.003445 | 2.277215  |     |   |   |           |           |           |

DFT calculation of real system using SPINOL-derived CPA (S)-1be

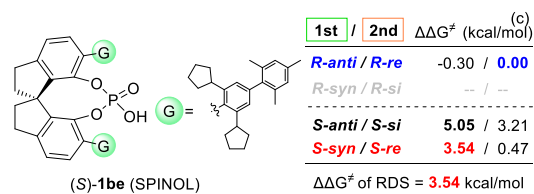

TS-1st-(R)-reaction pathway: R-anti/(S)-1be (SPINOL)

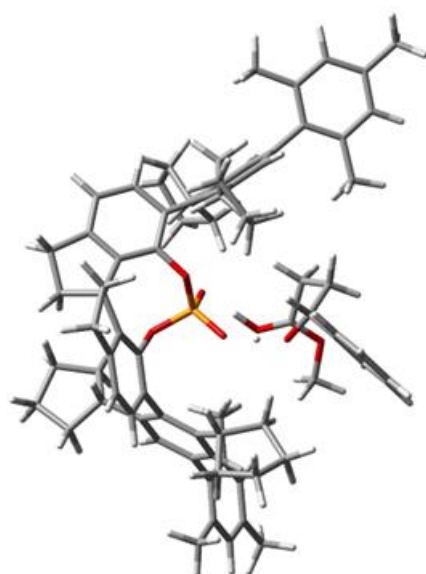

B3LYP/6-31G(d); E(B3LYP) = -3893.99550452 hartree  
 Zero-point Energy Correction = 1.501031 hartree  
 Thermal Correction to Energy = 1.582038 hartree  
 Thermal correction to Enthalpy = 1.582982 hartree  
 Thermal correction to Gibbs Free Energy = 1.372274 hartree  
 Sum of electronic and Zero-point Energies = -3892.494473 hartree  
 Sum of electronic and thermal Energies = -3892.413467 hartree  
 Sum of electronic and thermal Enthalpies = -3892.412523 hartree  
 Sum of electronic and thermal Free Energies = -3892.623231 hartree  
 The number of Imaginary frequencies = 1

| Center Number | Atomic Number | Atomic Type | Coordinates (Angstroms) |           |           |
|---------------|---------------|-------------|-------------------------|-----------|-----------|
|               |               |             | X                       | Y         | Z         |
| 1             | 6             | 0           | -0.058630               | -2.910367 | -0.811692 |
| 2             | 8             | 0           | -0.399811               | -2.474902 | 0.794053  |
| 3             | 6             | 0           | 0.759688                | -2.787824 | 1.629642  |
| 4             | 6             | 0           | 1.762587                | -3.478855 | 0.682621  |
| 5             | 6             | 0           | 1.457334                | -2.902985 | -0.700228 |
| 6             | 1             | 0           | 1.166124                | -1.824973 | 1.956343  |
| 7             | 1             | 0           | 1.605551                | -4.561101 | 0.685043  |
| 8             | 1             | 0           | 2.788154                | -3.285438 | 1.003406  |
| 9             | 1             | 0           | 1.879397                | -3.497984 | -1.514852 |
| 10            | 1             | 0           | 1.811727                | -1.872708 | -0.798849 |
| 11            | 8             | 0           | -0.700046               | -2.042379 | -1.581566 |
| 12            | 8             | 0           | -0.526006               | -4.172735 | -0.910793 |
| 13            | 6             | 0           | -1.938875               | -4.331138 | -1.134715 |
| 14            | 1             | 0           | -2.123194               | -5.402899 | -1.050686 |
| 15            | 1             | 0           | -2.212489               | -3.976195 | -2.129622 |
| 16            | 1             | 0           | -2.510929               | -3.789089 | -0.376954 |
| 17            | 1             | 0           | -0.601778               | -1.364914 | 0.908600  |
| 18            | 1             | 0           | -0.306897               | -1.106057 | -1.518529 |
| 19            | 6             | 0           | 1.115332                | 4.018686  | 0.368403  |
| 20            | 6             | 0           | 1.691652                | 2.751761  | 0.248149  |

|    |    |   |           |           |           |
|----|----|---|-----------|-----------|-----------|
| 21 | 6  | 0 | 3.465078  | 3.693968  | -1.078531 |
| 22 | 6  | 0 | 2.850515  | 4.943854  | -1.056211 |
| 23 | 6  | 0 | 1.673910  | 5.098465  | -0.334149 |
| 24 | 1  | 0 | 4.406529  | 3.566659  | -1.604110 |
| 25 | 1  | 0 | 3.292600  | 5.782023  | -1.589165 |
| 26 | 6  | 0 | 0.827184  | 6.341173  | -0.175062 |
| 27 | 1  | 0 | 1.293983  | 7.055659  | 0.517803  |
| 28 | 1  | 0 | 0.679313  | 6.872795  | -1.122090 |
| 29 | 6  | 0 | -0.042312 | 4.517348  | 1.230288  |
| 30 | 6  | 0 | -0.483945 | 5.772543  | 0.401793  |
| 31 | 1  | 0 | -1.134774 | 5.441114  | -0.415669 |
| 32 | 1  | 0 | -1.046300 | 6.492701  | 1.003858  |
| 33 | 6  | 0 | 0.435531  | 4.974295  | 2.648962  |
| 34 | 1  | 0 | 1.025635  | 4.167306  | 3.098434  |
| 35 | 1  | 0 | 1.066312  | 5.868121  | 2.610961  |
| 36 | 6  | 0 | -0.871027 | 5.178714  | 3.450126  |
| 37 | 1  | 0 | -1.242790 | 6.208564  | 3.355022  |
| 38 | 1  | 0 | -0.740842 | 4.991756  | 4.522429  |
| 39 | 6  | 0 | -1.814572 | 4.186771  | 2.802365  |
| 40 | 6  | 0 | -1.261044 | 3.687999  | 1.613287  |
| 41 | 6  | 0 | -3.067420 | 3.760323  | 3.228431  |
| 42 | 1  | 0 | -3.512711 | 4.157337  | 4.137468  |
| 43 | 6  | 0 | -1.907486 | 2.656194  | 0.939859  |
| 44 | 6  | 0 | -3.758968 | 2.820249  | 2.462015  |
| 45 | 1  | 0 | -4.757452 | 2.514030  | 2.758895  |
| 46 | 8  | 0 | 1.071910  | 1.666397  | 0.871569  |
| 47 | 8  | 0 | -1.273885 | 2.060167  | -0.153684 |
| 48 | 15 | 0 | -0.163036 | 0.891549  | 0.117374  |
| 49 | 8  | 0 | -0.675072 | -0.094566 | 1.166466  |
| 50 | 8  | 0 | 0.248590  | 0.348210  | -1.225778 |
| 51 | 6  | 0 | 2.900175  | 2.568306  | -0.452978 |
| 52 | 6  | 0 | -3.191651 | 2.224062  | 1.324222  |
| 53 | 6  | 0 | 0.353473  | -3.600848 | 2.836412  |
| 54 | 6  | 0 | 0.693482  | -3.165257 | 4.120919  |
| 55 | 6  | 0 | -0.346584 | -4.806362 | 2.688779  |
| 56 | 6  | 0 | 0.348266  | -3.922777 | 5.242782  |
| 57 | 1  | 0 | 1.229055  | -2.226842 | 4.245584  |
| 58 | 6  | 0 | -0.699026 | -5.558801 | 3.807143  |
| 59 | 1  | 0 | -0.618922 | -5.145309 | 1.693153  |
| 60 | 6  | 0 | -0.350316 | -5.119857 | 5.088171  |
| 61 | 1  | 0 | 0.619829  | -3.572521 | 6.234965  |
| 62 | 1  | 0 | -1.246055 | -6.489458 | 3.681281  |
| 63 | 1  | 0 | -0.624130 | -5.708753 | 5.959466  |
| 64 | 6  | 0 | -3.956378 | 1.193626  | 0.547982  |
| 65 | 6  | 0 | -4.992558 | -0.992324 | 0.382137  |
| 66 | 6  | 0 | -5.156629 | 0.532784  | -1.454962 |
| 67 | 6  | 0 | -5.444725 | -0.722107 | -0.912176 |
| 68 | 1  | 0 | -5.215329 | -1.962619 | 0.819705  |
| 69 | 1  | 0 | -5.524575 | 0.764598  | -2.450876 |
| 70 | 6  | 0 | 3.687677  | 1.289087  | -0.537449 |
| 71 | 6  | 0 | 5.389963  | -0.163980 | 0.404275  |
| 72 | 6  | 0 | 4.841156  | -0.339717 | -1.919444 |
| 73 | 6  | 0 | 5.642476  | -0.737573 | -0.844921 |
| 74 | 1  | 0 | 5.993806  | -0.478974 | 1.251928  |
| 75 | 1  | 0 | 5.012851  | -0.796100 | -2.891115 |
| 76 | 6  | 0 | -6.213136 | -1.743213 | -1.692564 |
| 77 | 6  | 0 | -7.656013 | -3.689874 | -3.157272 |
| 78 | 6  | 0 | 6.789022  | -1.685525 | -1.045391 |
| 79 | 6  | 0 | 8.983792  | -3.430665 | -1.435411 |
| 80 | 6  | 0 | -4.423824 | 1.497240  | -0.756112 |
| 81 | 6  | 0 | -4.196792 | 2.847427  | -1.416151 |
| 82 | 6  | 0 | -3.460747 | 2.821324  | -2.774453 |
| 83 | 6  | 0 | -5.487076 | 3.636898  | -1.754167 |
| 84 | 1  | 0 | -3.604830 | 3.474769  | -0.743382 |
| 85 | 6  | 0 | -3.655955 | 4.250099  | -3.315719 |
| 86 | 1  | 0 | -3.939586 | 2.093510  | -3.443040 |
| 87 | 1  | 0 | -2.410698 | 2.532161  | -2.672489 |
| 88 | 6  | 0 | -5.042652 | 4.715419  | -2.776943 |
| 89 | 1  | 0 | -5.956358 | 4.062299  | -0.860107 |

|     |   |   |           |           |           |     |   |   |           |           |           |
|-----|---|---|-----------|-----------|-----------|-----|---|---|-----------|-----------|-----------|
| 90  | 1 | 0 | -6.223343 | 2.962673  | -2.207963 | 159 | 1 | 0 | 9.252802  | 0.505046  | -2.068651 |
| 91  | 1 | 0 | -2.863940 | 4.902796  | -2.927648 | 160 | 6 | 0 | 10.148440 | -4.364081 | -1.672563 |
| 92  | 1 | 0 | -3.592411 | 4.295501  | -4.408387 | 161 | 1 | 0 | 10.235394 | -4.633055 | -2.733945 |
| 93  | 1 | 0 | -4.963130 | 5.700397  | -2.303644 | 162 | 1 | 0 | 11.098437 | -3.903284 | -1.379078 |
| 94  | 1 | 0 | -5.776817 | 4.817269  | -3.583667 | 163 | 1 | 0 | 10.036494 | -5.296054 | -1.108550 |
| 95  | 6 | 0 | -4.258029 | -0.062680 | 1.129119  | 164 | 6 | 0 | -8.207637 | -1.439828 | -0.125531 |
| 96  | 6 | 0 | -3.846846 | -0.436272 | 2.547118  | 165 | 1 | 0 | -7.806953 | -1.795141 | 0.831728  |
| 97  | 6 | 0 | -5.045067 | -0.439110 | 3.546367  | 166 | 1 | 0 | -8.074645 | -0.352895 | -0.136236 |
| 98  | 6 | 0 | -3.197836 | -1.854951 | 2.714093  | 167 | 1 | 0 | -9.281248 | -1.654057 | -0.132047 |
| 99  | 1 | 0 | -3.118687 | 0.297989  | 2.894495  | 168 | 6 | 0 | -4.242484 | -1.991309 | -3.303251 |
| 100 | 6 | 0 | -4.665627 | -1.476355 | 4.612697  | 169 | 1 | 0 | -4.233323 | -1.027529 | -3.827505 |
| 101 | 1 | 0 | -5.959123 | -0.761036 | 3.030083  | 170 | 1 | 0 | -3.526902 | -1.900016 | -2.480430 |
| 102 | 1 | 0 | -5.243574 | 0.556136  | 3.959742  | 171 | 1 | 0 | -3.867458 | -2.743475 | -4.005823 |
| 103 | 6 | 0 | -4.029383 | -2.600887 | 3.781095  | 172 | 6 | 0 | -8.414417 | -4.753356 | -3.917460 |
| 104 | 1 | 0 | -2.165832 | -1.734887 | 3.054642  | 173 | 1 | 0 | -8.080526 | -4.817757 | -4.958663 |
| 105 | 1 | 0 | -3.146428 | -2.403588 | 1.770207  | 174 | 1 | 0 | -8.271232 | -5.745716 | -3.468323 |
| 106 | 1 | 0 | -3.923662 | -1.053146 | 5.304005  | 175 | 1 | 0 | -9.491687 | -4.553506 | -3.919534 |
| 107 | 1 | 0 | -5.520884 | -1.808249 | 5.213062  |     |   |   |           |           |           |
| 108 | 1 | 0 | -3.425399 | -3.295370 | 4.375114  |     |   |   |           |           |           |
| 109 | 1 | 0 | -4.824350 | -3.190919 | 3.303610  |     |   |   |           |           |           |
| 110 | 6 | 0 | 4.434320  | 0.845970  | 0.582007  |     |   |   |           |           |           |
| 111 | 6 | 0 | 4.276926  | 1.461452  | 1.962842  |     |   |   |           |           |           |
| 112 | 6 | 0 | 3.757859  | 0.488910  | 3.054325  |     |   |   |           |           |           |
| 113 | 6 | 0 | 5.561675  | 2.033913  | 2.603619  |     |   |   |           |           |           |
| 114 | 1 | 0 | 3.565660  | 2.289543  | 1.899642  |     |   |   |           |           |           |
| 115 | 6 | 0 | 4.165221  | 1.129414  | 4.411002  |     |   |   |           |           |           |
| 116 | 1 | 0 | 4.241768  | -0.488331 | 2.934359  |     |   |   |           |           |           |
| 117 | 1 | 0 | 2.678358  | 0.330939  | 2.961457  |     |   |   |           |           |           |
| 118 | 6 | 0 | 5.143454  | 2.287708  | 4.062087  |     |   |   |           |           |           |
| 119 | 1 | 0 | 5.919654  | 2.935046  | 2.093030  |     |   |   |           |           |           |
| 120 | 1 | 0 | 6.370610  | 1.292885  | 2.563193  |     |   |   |           |           |           |
| 121 | 1 | 0 | 3.293312  | 1.504170  | 4.957811  |     |   |   |           |           |           |
| 122 | 1 | 0 | 4.644969  | 0.388458  | 5.060154  |     |   |   |           |           |           |
| 123 | 1 | 0 | 4.623097  | 3.251240  | 4.130430  |     |   |   |           |           |           |
| 124 | 1 | 0 | 5.998450  | 2.339694  | 4.744934  |     |   |   |           |           |           |
| 125 | 6 | 0 | 3.861653  | 0.654564  | -1.793935 |     |   |   |           |           |           |
| 126 | 6 | 0 | 3.047002  | 1.043964  | -3.019014 |     |   |   |           |           |           |
| 127 | 6 | 0 | 3.844774  | 1.778047  | -4.133446 |     |   |   |           |           |           |
| 128 | 6 | 0 | 2.386898  | -0.122092 | -3.789384 |     |   |   |           |           |           |
| 129 | 1 | 0 | 2.231873  | 1.696412  | -2.694197 |     |   |   |           |           |           |
| 130 | 6 | 0 | 3.042853  | 1.554649  | -5.447810 |     |   |   |           |           |           |
| 131 | 1 | 0 | 4.846904  | 1.340054  | -4.217380 |     |   |   |           |           |           |
| 132 | 1 | 0 | 3.982104  | 2.839046  | -3.899949 |     |   |   |           |           |           |
| 133 | 6 | 0 | 1.918428  | 0.545741  | -5.091394 |     |   |   |           |           |           |
| 134 | 1 | 0 | 1.570031  | -0.575114 | -3.222496 |     |   |   |           |           |           |
| 135 | 1 | 0 | 3.123285  | -0.905660 | -4.013209 |     |   |   |           |           |           |
| 136 | 1 | 0 | 2.629068  | 2.490988  | -5.837402 |     |   |   |           |           |           |
| 137 | 1 | 0 | 3.696102  | 1.152948  | -6.230819 |     |   |   |           |           |           |
| 138 | 1 | 0 | 0.978341  | 1.078986  | -4.904628 |     |   |   |           |           |           |
| 139 | 1 | 0 | 1.725042  | -0.173839 | -5.894728 |     |   |   |           |           |           |
| 140 | 6 | 0 | 7.754007  | -3.909884 | -0.980769 |     |   |   |           |           |           |
| 141 | 1 | 0 | 7.640797  | -4.972575 | -0.773828 |     |   |   |           |           |           |
| 142 | 6 | 0 | 6.658234  | -3.062619 | -0.780994 |     |   |   |           |           |           |
| 143 | 6 | 0 | 9.098775  | -2.060012 | -1.684769 |     |   |   |           |           |           |
| 144 | 1 | 0 | 10.050764 | -1.661133 | -2.030996 |     |   |   |           |           |           |
| 145 | 6 | 0 | 8.027562  | -1.180614 | -1.501005 |     |   |   |           |           |           |
| 146 | 6 | 0 | -5.632525 | -2.355227 | -2.825228 |     |   |   |           |           |           |
| 147 | 6 | 0 | -6.362506 | -3.318928 | -3.530359 |     |   |   |           |           |           |
| 148 | 1 | 0 | -5.904895 | -3.790471 | -4.398568 |     |   |   |           |           |           |
| 149 | 6 | 0 | -8.220793 | -3.058510 | -2.046102 |     |   |   |           |           |           |
| 150 | 1 | 0 | -9.235659 | -3.316041 | -1.747452 |     |   |   |           |           |           |
| 151 | 6 | 0 | -7.525038 | -2.097038 | -1.306461 |     |   |   |           |           |           |
| 152 | 6 | 0 | 5.354986  | -3.637234 | -0.277274 |     |   |   |           |           |           |
| 153 | 1 | 0 | 5.120228  | -3.271597 | 0.730244  |     |   |   |           |           |           |
| 154 | 1 | 0 | 4.516095  | -3.351771 | -0.921383 |     |   |   |           |           |           |
| 155 | 1 | 0 | 5.396572  | -4.730192 | -0.233854 |     |   |   |           |           |           |
| 156 | 6 | 0 | 8.217660  | 0.293819  | -1.782628 |     |   |   |           |           |           |
| 157 | 1 | 0 | 7.566354  | 0.639157  | -2.594074 |     |   |   |           |           |           |
| 158 | 1 | 0 | 7.974486  | 0.906413  | -0.906798 |     |   |   |           |           |           |

TS-2nd-(R)-reaction pathway: R-re/(S)-Ibe (SPINOL)

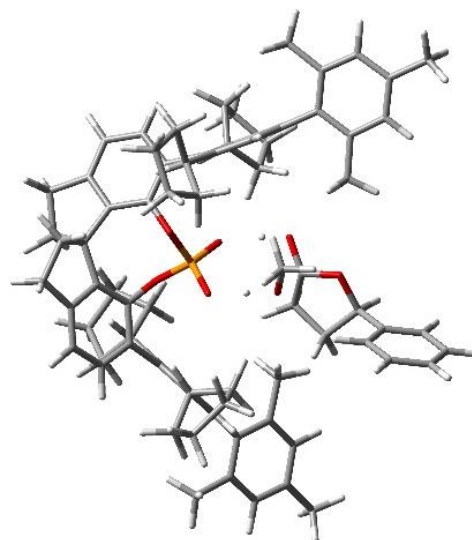

B3LYP/6-31G(d); E(B3LYP) = -3893.99523492 hartree

Zero-point Energy Correction = 1.501708 hartree

Thermal Correction to Energy = 1.582967 hartree

Thermal correction to Enthalpy = 1.583911 hartree

Thermal correction to Gibbs Free Energy = 1.372482 hartree

Sum of electronic and Zero-point Energies = -3892.493527 hartree

Sum of electronic and thermal Energies = -3892.412268 hartree

Sum of electronic and thermal Enthalpies = -3892.411324 hartree

Sum of electronic and thermal Free Energies = -3892.622753 hartree

The number of Imaginary frequencies = 1

| Center Number | Atomic Number | Atomic Type | Coordinates (Angstroms) |          |           |
|---------------|---------------|-------------|-------------------------|----------|-----------|
|               |               |             | X                       | Y        | Z         |
| 1             | 6             | 0           | -0.480325               | 2.598583 | -0.318993 |
| 2             | 8             | 0           | -0.853608               | 3.890066 | -0.185204 |
| 3             | 8             | 0           | -0.282118               | 2.074223 | 1.305455  |
| 4             | 6             | 0           | 0.300190                | 4.789104 | -0.325732 |
| 5             | 6             | 0           | 1.528939                | 3.857355 | -0.316710 |
| 6             | 6             | 0           | 0.955852                | 2.529421 | -0.821245 |
| 7             | 1             | 0           | 0.184200                | 5.251265 | -1.312790 |
| 8             | 1             | 0           | 1.919372                | 3.746261 | 0.697940  |
| 9             | 1             | 0           | 2.330755                | 4.250631 | -0.946691 |
| 10            | 1             | 0           | 1.487075                | 1.643645 | -0.472520 |
| 11            | 1             | 0           | 0.907898                | 2.491201 | -1.915424 |
| 12            | 8             | 0           | -1.441533               | 1.853735 | -0.831665 |

|    |    |   |           |           |           |     |   |   |           |           |           |
|----|----|---|-----------|-----------|-----------|-----|---|---|-----------|-----------|-----------|
| 13 | 6  | 0 | -1.504080 | 2.122606  | 2.073095  | 82  | 6 | 0 | -5.695457 | -2.507756 | 2.478278  |
| 14 | 1  | 0 | -1.817156 | 3.164577  | 2.142062  | 83  | 1 | 0 | -3.693744 | -2.823588 | 1.787873  |
| 15 | 1  | 0 | -1.275940 | 1.726443  | 3.064949  | 84  | 6 | 0 | -4.146751 | -2.091465 | 4.369774  |
| 16 | 1  | 0 | -2.283740 | 1.524461  | 1.595123  | 85  | 1 | 0 | -4.321479 | -0.224385 | 3.251105  |
| 17 | 1  | 0 | 0.062346  | 1.026760  | 1.287224  | 86  | 1 | 0 | -2.732113 | -0.981891 | 3.072879  |
| 18 | 1  | 0 | -1.102846 | 0.908385  | -1.009422 | 87  | 6 | 0 | -5.392667 | -2.925000 | 3.936569  |
| 19 | 6  | 0 | -1.175817 | -4.347914 | 0.085774  | 88  | 1 | 0 | -6.082976 | -3.331325 | 1.868271  |
| 20 | 6  | 0 | -1.787481 | -3.094846 | 0.107305  | 89  | 1 | 0 | -6.450736 | -1.712330 | 2.458679  |
| 21 | 6  | 0 | -3.552699 | -3.934647 | -1.294036 | 90  | 1 | 0 | -3.305279 | -2.757682 | 4.593043  |
| 22 | 6  | 0 | -2.907807 | -5.165836 | -1.404510 | 91  | 1 | 0 | -4.332082 | -1.507175 | 5.277656  |
| 23 | 6  | 0 | -1.713815 | -5.362794 | -0.720843 | 92  | 1 | 0 | -5.170209 | -3.996733 | 3.990908  |
| 24 | 1  | 0 | -4.500053 | -3.775884 | -1.800436 | 93  | 1 | 0 | -6.253750 | -2.751926 | 4.591094  |
| 25 | 1  | 0 | -3.336889 | -5.955689 | -2.016165 | 94  | 6 | 0 | -3.193477 | -1.157344 | -3.017628 |
| 26 | 6  | 0 | -0.822274 | -6.584844 | -0.707931 | 95  | 6 | 0 | -4.145177 | -1.676470 | -4.129439 |
| 27 | 1  | 0 | -1.250749 | -7.386964 | -0.090345 | 96  | 6 | 0 | -2.407256 | 0.015425  | -3.701954 |
| 28 | 1  | 0 | -0.671791 | -7.005656 | -1.708766 | 97  | 1 | 0 | -2.470757 | -1.948678 | -2.808873 |
| 29 | 6  | 0 | 0.009522  | -4.893251 | 0.875939  | 98  | 6 | 0 | -3.356960 | -1.449428 | -5.425691 |
| 30 | 6  | 0 | 0.480010  | -6.034980 | -0.090249 | 99  | 1 | 0 | -5.067159 | -1.079121 | -4.144649 |
| 31 | 1  | 0 | 1.104051  | -5.593982 | -0.876325 | 100 | 1 | 0 | -4.437637 | -2.721123 | -3.974127 |
| 32 | 1  | 0 | 1.076993  | -6.796722 | 0.420625  | 101 | 6 | 0 | -2.739516 | -0.054837 | -5.215845 |
| 33 | 6  | 0 | -0.439354 | -5.520252 | 2.238047  | 102 | 1 | 0 | -1.338823 | -0.117760 | -3.514091 |
| 34 | 1  | 0 | -1.052957 | -4.789192 | 2.776907  | 103 | 1 | 0 | -2.678457 | 0.987040  | -3.279380 |
| 35 | 1  | 0 | -1.039296 | -6.425913 | 2.104400  | 104 | 1 | 0 | -2.564453 | -2.205015 | -5.514840 |
| 36 | 6  | 0 | 0.879550  | -5.765120 | 3.004451  | 105 | 1 | 0 | -3.976554 | -1.516584 | -6.327574 |
| 37 | 1  | 0 | 1.289348  | -6.761804 | 2.788924  | 106 | 1 | 0 | -1.863280 | 0.121469  | -5.849727 |
| 38 | 1  | 0 | 0.752973  | -5.707545 | 4.091818  | 107 | 1 | 0 | -3.480212 | 0.712525  | -5.477019 |
| 39 | 6  | 0 | 1.778259  | -4.670003 | 2.470497  | 108 | 6 | 0 | 3.612675  | 0.038948  | 2.714103  |
| 40 | 6  | 0 | 1.202208  | -4.063688 | 1.343102  | 109 | 6 | 0 | 4.680922  | -0.083145 | 3.834894  |
| 41 | 6  | 0 | 3.013149  | -4.246470 | 2.947685  | 110 | 6 | 0 | 3.013523  | 1.435004  | 2.995132  |
| 42 | 1  | 0 | 3.473526  | -4.727436 | 3.807315  | 111 | 1 | 0 | 2.818265  | -0.685702 | 2.915563  |
| 43 | 6  | 0 | 1.809451  | -2.936519 | 0.791978  | 112 | 6 | 0 | 4.085620  | 0.658622  | 5.063104  |
| 44 | 6  | 0 | 3.667426  | -3.201479 | 2.294636  | 113 | 1 | 0 | 5.606897  | 0.404257  | 3.504880  |
| 45 | 1  | 0 | 4.655656  | -2.896232 | 2.624349  | 114 | 1 | 0 | 4.933780  | -1.125272 | 4.055373  |
| 46 | 8  | 0 | -1.190094 | -2.071112 | 0.842819  | 115 | 6 | 0 | 2.861040  | 1.451920  | 4.525881  |
| 47 | 8  | 0 | 1.160565  | -2.242552 | -0.230865 | 116 | 1 | 0 | 2.069755  | 1.594356  | 2.467930  |
| 48 | 15 | 0 | -0.005801 | -1.163584 | 0.158092  | 117 | 1 | 0 | 3.710070  | 2.224500  | 2.683174  |
| 49 | 8  | 0 | 0.461460  | -0.257132 | 1.293719  | 118 | 1 | 0 | 3.784043  | -0.043188 | 5.848173  |
| 50 | 8  | 0 | -0.440992 | -0.524688 | -1.134462 | 119 | 1 | 0 | 4.829301  | 1.326785  | 5.511519  |
| 51 | 6  | 0 | -3.003320 | -2.865266 | -0.566402 | 120 | 1 | 0 | 1.931316  | 0.941560  | 4.805802  |
| 52 | 6  | 0 | 3.077343  | -2.503827 | 1.227849  | 121 | 1 | 0 | 2.803545  | 2.467125  | 4.934258  |
| 53 | 6  | 0 | 0.265332  | 5.864899  | 0.731558  | 122 | 6 | 0 | 4.091899  | -2.790837 | -1.572719 |
| 54 | 6  | 0 | 0.190455  | 7.209225  | 0.354279  | 123 | 6 | 0 | 3.357598  | -2.527358 | -2.906866 |
| 55 | 6  | 0 | 0.323530  | 5.544188  | 2.095540  | 124 | 6 | 0 | 5.347419  | -3.580590 | -2.026789 |
| 56 | 6  | 0 | 0.182850  | 8.220586  | 1.317215  | 125 | 1 | 0 | 3.469663  | -3.483594 | -0.999715 |
| 57 | 1  | 0 | 0.136354  | 7.467777  | -0.700876 | 126 | 6 | 0 | 3.487992  | -3.867012 | -3.650806 |
| 58 | 6  | 0 | 0.305836  | 6.551392  | 3.058157  | 127 | 1 | 0 | 3.871897  | -1.731953 | -3.463544 |
| 59 | 1  | 0 | 0.381771  | 4.503305  | 2.400973  | 128 | 1 | 0 | 2.322075  | -2.209464 | -2.754212 |
| 60 | 6  | 0 | 0.238279  | 7.892950  | 2.671473  | 129 | 6 | 0 | 4.882914  | -4.425993 | -3.246366 |
| 61 | 1  | 0 | 0.127335  | 9.260722  | 1.007891  | 130 | 1 | 0 | 5.758115  | -4.192281 | -1.215888 |
| 62 | 1  | 0 | 0.348012  | 6.290561  | 4.112268  | 131 | 1 | 0 | 6.138982  | -2.884397 | -2.326985 |
| 63 | 1  | 0 | 0.227967  | 8.677037  | 3.423692  | 132 | 1 | 0 | 2.697244  | -4.549579 | -3.314339 |
| 64 | 6  | 0 | 3.839506  | -1.385362 | 0.577580  | 133 | 1 | 0 | 3.373644  | -3.761878 | -4.735220 |
| 65 | 6  | 0 | -3.757049 | -1.566405 | -0.531131 | 134 | 1 | 0 | 4.821411  | -5.491007 | -2.997238 |
| 66 | 6  | 0 | -5.449522 | 0.704067  | -0.560332 | 135 | 1 | 0 | 5.599953  | -4.341344 | -4.070468 |
| 67 | 6  | 0 | 5.508958  | 0.602308  | -0.559262 | 136 | 6 | 0 | 6.428079  | 1.630278  | -1.145892 |
| 68 | 6  | 0 | 4.967908  | 0.759618  | 0.720128  | 137 | 6 | 0 | 7.753252  | 1.745593  | -0.671937 |
| 69 | 1  | 0 | 5.209701  | 1.661288  | 1.276342  | 138 | 6 | 0 | 5.982634  | 2.483719  | -2.177264 |
| 70 | 6  | 0 | 4.138643  | -0.205257 | 1.306110  | 139 | 6 | 0 | 8.598240  | 2.709516  | -1.231114 |
| 71 | 6  | 0 | 5.182125  | -0.556172 | -1.267191 | 140 | 6 | 0 | 6.859359  | 3.437709  | -2.705088 |
| 72 | 1  | 0 | 5.599863  | -0.691975 | -2.261430 | 141 | 6 | 0 | 8.173402  | 3.566403  | -2.249856 |
| 73 | 6  | 0 | 4.362178  | -1.555208 | -0.729215 | 142 | 1 | 0 | 9.618991  | 2.789323  | -0.861069 |
| 74 | 6  | 0 | -5.260859 | -0.038071 | 0.609072  | 143 | 1 | 0 | 6.503129  | 4.098435  | -3.493671 |
| 75 | 1  | 0 | -5.801651 | 0.257700  | 1.504903  | 144 | 6 | 0 | -6.416962 | 1.849488  | -0.608545 |
| 76 | 6  | 0 | -4.437045 | -1.170965 | 0.647629  | 145 | 6 | 0 | -7.744237 | 1.617100  | -1.030644 |
| 77 | 6  | 0 | -4.747925 | 0.312499  | -1.702676 | 146 | 6 | 0 | -6.020269 | 3.151027  | -0.241002 |
| 78 | 1  | 0 | -4.876301 | 0.891250  | -2.614296 | 147 | 6 | 0 | -8.644034 | 2.686223  | -1.079034 |
| 79 | 6  | 0 | -3.899183 | -0.801314 | -1.715941 | 148 | 6 | 0 | -6.951988 | 4.193489  | -0.307925 |
| 80 | 6  | 0 | -4.349965 | -1.962074 | 1.942788  | 149 | 6 | 0 | -8.267672 | 3.985237  | -0.726702 |
| 81 | 6  | 0 | -3.803120 | -1.188636 | 3.164252  | 150 | 1 | 0 | -9.666723 | 2.497598  | -1.401379 |

|     |   |   |            |           |           |    |   |   |           |           |           |
|-----|---|---|------------|-----------|-----------|----|---|---|-----------|-----------|-----------|
| 151 | 1 | 0 | -6.637038  | 5.196079  | -0.023385 | 3  | 6 | 0 | -1.737221 | -2.731494 | -0.322211 |
| 152 | 6 | 0 | -4.615909  | 3.436365  | 0.239919  | 4  | 6 | 0 | -1.672511 | -3.173859 | -1.810683 |
| 153 | 1 | 0 | -4.450327  | 3.019381  | 1.242061  | 5  | 6 | 0 | -0.419151 | -2.504779 | -2.369290 |
| 154 | 1 | 0 | -3.855171  | 2.996409  | -0.411591 | 6  | 1 | 0 | -2.333564 | -1.816879 | -0.231482 |
| 155 | 1 | 0 | -4.433645  | 4.514247  | 0.298029  | 7  | 1 | 0 | -1.577537 | -4.261216 | -1.871313 |
| 156 | 6 | 0 | -8.208894  | 0.231956  | -1.425239 | 8  | 1 | 0 | -2.578731 | -2.883573 | -2.345999 |
| 157 | 1 | 0 | -7.660412  | -0.146377 | -2.296031 | 9  | 1 | 0 | -0.065456 | -2.965931 | -3.295715 |
| 158 | 1 | 0 | -8.048367  | -0.493256 | -0.619083 | 10 | 1 | 0 | -0.562098 | -1.433494 | -2.536295 |
| 159 | 1 | 0 | -9.274987  | 0.234498  | -1.673418 | 11 | 8 | 0 | 1.653273  | -1.852440 | -1.169570 |
| 160 | 6 | 0 | -9.247597  | 5.132001  | -0.822335 | 12 | 8 | 0 | 0.963168  | -3.985356 | -1.158791 |
| 161 | 1 | 0 | -8.991350  | 5.937920  | -0.126143 | 13 | 6 | 0 | 2.053010  | -4.299113 | -0.277985 |
| 162 | 1 | 0 | -9.258440  | 5.565802  | -1.831577 | 14 | 1 | 0 | 2.084798  | -5.388627 | -0.237405 |
| 163 | 1 | 0 | -10.270009 | 4.806049  | -0.600924 | 15 | 1 | 0 | 2.992618  | -3.905399 | -0.670094 |
| 164 | 6 | 0 | 4.572171   | 2.393479  | -2.717495 | 16 | 1 | 0 | 1.870347  | -3.890221 | 0.719382  |
| 165 | 1 | 0 | 4.418182   | 1.483700  | -3.310213 | 17 | 1 | 0 | -0.304366 | -1.264084 | 0.385430  |
| 166 | 1 | 0 | 3.833542   | 2.363774  | -1.909307 | 18 | 1 | 0 | 1.373764  | -0.905623 | -1.395182 |
| 167 | 1 | 0 | 4.347065   | 3.249744  | -3.361926 | 19 | 6 | 0 | 1.644260  | 4.058231  | -0.162555 |
| 168 | 6 | 0 | 8.283364   | 0.837904  | 0.417280  | 20 | 6 | 0 | 2.161840  | 2.768857  | -0.051727 |
| 169 | 1 | 0 | 7.830356   | 1.057744  | 1.391472  | 21 | 6 | 0 | 4.093378  | 3.452677  | -1.313808 |
| 170 | 1 | 0 | 8.068465   | -0.214873 | 0.203778  | 22 | 6 | 0 | 3.524704  | 4.703055  | -1.552255 |
| 171 | 1 | 0 | 9.367032   | 0.951099  | 0.522470  | 23 | 6 | 0 | 2.295347  | 4.998250  | -0.977056 |
| 172 | 6 | 0 | 9.115242   | 4.579188  | -2.859183 | 24 | 1 | 0 | 5.077522  | 3.225057  | -1.711003 |
| 173 | 1 | 0 | 9.709467   | 4.134740  | -3.669104 | 25 | 1 | 0 | 4.045241  | 5.434187  | -2.165909 |
| 174 | 1 | 0 | 8.569975   | 5.428076  | -3.285529 | 26 | 6 | 0 | 1.478605  | 6.267753  | -1.086975 |
| 175 | 1 | 0 | 9.821452   | 4.968652  | -2.117617 | 27 | 1 | 0 | 1.933771  | 7.089720  | -0.516901 |

TS-1st-(S)-reaction pathway: *S-anti*/(*S*)-1be (SPINOL)

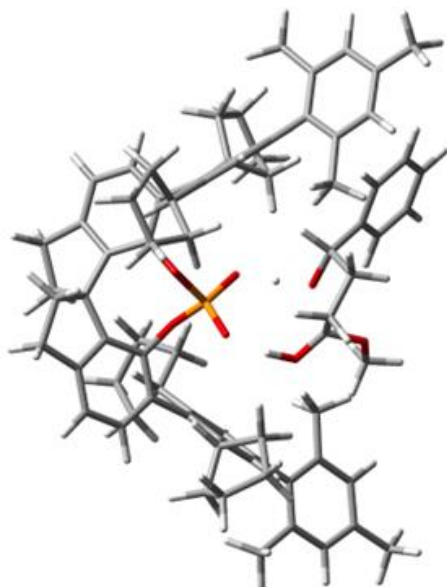

B3LYP/6-31G(d); E(B3LYP) = -3893.98967222 hartree

Zero-point Energy Correction = 1.501491 hartree

Thermal Correction to Energy = 1.582099 hartree

Thermal correction to Enthalpy = 1.583043 hartree

Thermal correction to Gibbs Free Energy = 1.374961 hartree

Sum of electronic and Zero-point Energies = -3892.488181 hartree

Sum of electronic and thermal Energies = -3892.407573 hartree

Sum of electronic and thermal Enthalpies = -3892.406629 hartree

Sum of electronic and thermal Free Energies = -3892.614712 hartree

The number of Imaginary frequencies = 1

| Center Number | Atomic Number | Atomic Type | Coordinates (Angstroms) |           |           |
|---------------|---------------|-------------|-------------------------|-----------|-----------|
|               |               |             | X                       | Y         | Z         |
| 1             | 6             | 0           | 0.629059                | -2.685777 | -1.286055 |
| 2             | 8             | 0           | -0.376567               | -2.373713 | 0.042235  |

|    |    |   |           |           |           |
|----|----|---|-----------|-----------|-----------|
| 28 | 1  | 0 | 1.388984  | 6.617077  | -2.122127 |
| 29 | 6  | 0 | 0.489579  | 4.737704  | 0.561281  |
| 30 | 6  | 0 | 0.121939  | 5.845318  | -0.481935 |
| 31 | 1  | 0 | -0.510002 | 5.400267  | -1.259283 |
| 32 | 1  | 0 | -0.433549 | 6.675635  | -0.034826 |
| 33 | 6  | 0 | 0.995651  | 5.415365  | 1.880422  |
| 34 | 1  | 0 | 1.561580  | 4.676597  | 2.459732  |
| 35 | 1  | 0 | 1.657841  | 6.264627  | 1.686904  |
| 36 | 6  | 0 | -0.291268 | 5.797905  | 2.638248  |
| 37 | 1  | 0 | -0.640257 | 6.801251  | 2.356169  |
| 38 | 1  | 0 | -0.156388 | 5.807052  | 3.726015  |
| 39 | 6  | 0 | -1.262446 | 4.730409  | 2.185603  |
| 40 | 6  | 0 | -0.753450 | 4.027058  | 1.081440  |
| 41 | 6  | 0 | -2.508447 | 4.418888  | 2.714609  |
| 42 | 1  | 0 | -2.913743 | 4.976127  | 3.555542  |
| 43 | 6  | 0 | -1.450198 | 2.920892  | 0.592654  |
| 44 | 8  | 0 | 1.422239  | 1.793798  | 0.630841  |
| 45 | 8  | 0 | -0.901057 | 2.170575  | -0.450126 |
| 46 | 15 | 0 | 0.234025  | 1.018860  | -0.194316 |
| 47 | 8  | 0 | -0.288308 | -0.047176 | 0.775771  |
| 48 | 8  | 0 | 0.686640  | 0.551159  | -1.553289 |
| 49 | 6  | 0 | 3.423700  | 2.449910  | -0.592585 |
| 50 | 6  | 0 | -2.727521 | 2.597956  | 1.091683  |
| 51 | 6  | 0 | -2.305434 | -3.806826 | 0.583813  |
| 52 | 6  | 0 | -1.504804 | -4.547334 | 1.457636  |
| 53 | 6  | 0 | -3.675887 | -4.094435 | 0.509421  |
| 54 | 6  | 0 | -2.062967 | -5.558070 | 2.243696  |
| 55 | 1  | 0 | -0.447238 | -4.321233 | 1.528689  |
| 56 | 6  | 0 | -4.231913 | -5.106285 | 1.291796  |
| 57 | 1  | 0 | -4.316908 | -3.522278 | -0.156943 |
| 58 | 6  | 0 | -3.426158 | -5.842816 | 2.163207  |
| 59 | 1  | 0 | -1.428072 | -6.121807 | 2.922536  |
| 60 | 1  | 0 | -5.296430 | -5.314082 | 1.222532  |
| 61 | 1  | 0 | -3.859046 | -6.628788 | 2.776289  |
| 62 | 6  | 0 | 4.114504  | 1.133414  | -0.392671 |
| 63 | 6  | 0 | -3.240415 | 3.383875  | 2.137467  |
| 64 | 1  | 0 | -4.233056 | 3.151742  | 2.510606  |
| 65 | 6  | 0 | -3.599000 | 1.502178  | 0.553864  |
| 66 | 6  | 0 | -5.526745 | -0.387627 | -0.307590 |
| 67 | 6  | 0 | 5.668314  | -1.211842 | -0.044895 |
| 68 | 6  | 0 | 5.148627  | -0.865775 | -1.296291 |
| 69 | 1  | 0 | 5.348738  | -1.517593 | -2.142530 |
| 70 | 6  | 0 | 4.388894  | 0.292411  | -1.500772 |
| 71 | 6  | 0 | 5.381251  | -0.367206 | 1.031388  |



|     |   |   |           |           |           |     |   |   |            |           |           |
|-----|---|---|-----------|-----------|-----------|-----|---|---|------------|-----------|-----------|
| 72  | 1 | 0 | 5.789706  | -0.612001 | 2.007896  | 141 | 6 | 0 | 8.126417   | -4.748610 | 0.447183  |
| 73  | 6 | 0 | 4.611628  | 0.791623  | 0.890199  | 142 | 1 | 0 | 9.470352   | -3.775603 | -0.918355 |
| 74  | 6 | 0 | -4.864607 | -0.533956 | 0.918035  | 143 | 1 | 0 | 6.597781   | -5.402303 | 1.807101  |
| 75  | 1 | 0 | -5.106432 | -1.388685 | 1.542721  | 144 | 6 | 0 | -6.589706  | -1.353433 | -0.733331 |
| 76  | 6 | 0 | -3.916061 | 0.390276  | 1.374092  | 145 | 6 | 0 | -7.747488  | -1.529563 | 0.066168  |
| 77  | 6 | 0 | -5.180309 | 0.708175  | -1.104438 | 146 | 6 | 0 | -6.472132  | -2.085553 | -1.936864 |
| 78  | 1 | 0 | -5.691566 | 0.843599  | -2.053373 | 147 | 6 | 0 | -8.728802  | -2.438677 | -0.336467 |
| 79  | 6 | 0 | -4.227877 | 1.652925  | -0.706087 | 148 | 6 | 0 | -7.475959  | -2.996006 | -2.292024 |
| 80  | 6 | 0 | 4.380563  | 1.654645  | 2.120422  | 149 | 6 | 0 | -8.610142  | -3.194633 | -1.506405 |
| 81  | 6 | 0 | 3.634751  | 0.965179  | 3.285061  | 150 | 1 | 0 | -9.618502  | -2.554122 | 0.280302  |
| 82  | 6 | 0 | 5.665552  | 2.192632  | 2.805791  | 151 | 1 | 0 | -7.364089  | -3.562217 | -3.215191 |
| 83  | 1 | 0 | 3.782898  | 2.524612  | 1.835227  | 152 | 6 | 0 | -5.303463  | -1.918565 | -2.885848 |
| 84  | 6 | 0 | 3.817834  | 1.952693  | 4.449238  | 153 | 1 | 0 | -5.516231  | -1.165011 | -3.655847 |
| 85  | 1 | 0 | 4.114052  | 0.005318  | 3.521357  | 154 | 1 | 0 | -4.395623  | -1.593445 | -2.372987 |
| 86  | 1 | 0 | 2.586979  | 0.761794  | 3.044024  | 155 | 1 | 0 | -5.094289  | -2.858090 | -3.409262 |
| 87  | 6 | 0 | 5.245995  | 2.538615  | 4.263046  | 156 | 6 | 0 | -7.984187  | -0.731439 | 1.332339  |
| 88  | 1 | 0 | 6.080764  | 3.051541  | 2.267103  | 157 | 1 | 0 | -7.430762  | -1.136611 | -2.188344 |
| 89  | 1 | 0 | 6.441458  | 1.418677  | 2.806539  | 158 | 1 | 0 | -7.673243  | 0.311613  | 1.219816  |
| 90  | 1 | 0 | 3.069981  | 2.752067  | 4.368384  | 159 | 1 | 0 | -9.046371  | -0.745881 | 1.597393  |
| 91  | 1 | 0 | 3.676972  | 1.485488  | 5.430132  | 160 | 6 | 0 | -9.670083  | -4.198683 | -1.895298 |
| 92  | 1 | 0 | 5.255633  | 3.619331  | 4.441930  | 161 | 1 | 0 | -10.677333 | -3.818538 | -1.690122 |
| 93  | 1 | 0 | 5.948834  | 2.099339  | 4.979829  | 162 | 1 | 0 | -9.613757  | -4.449187 | -2.959729 |
| 94  | 6 | 0 | 3.933594  | 0.625036  | -2.917725 | 163 | 1 | 0 | -9.559200  | -5.135238 | -1.332302 |
| 95  | 6 | 0 | 5.093704  | 1.058205  | -3.856694 | 164 | 6 | 0 | 4.845467   | -3.392988 | 1.826098  |
| 96  | 6 | 0 | 3.218049  | -0.527142 | -3.706114 | 165 | 1 | 0 | 5.017272   | -2.899057 | 2.791570  |
| 97  | 1 | 0 | 3.228521  | 1.456913  | -2.861856 | 166 | 1 | 0 | 4.059930   | -2.827545 | 1.319756  |
| 98  | 6 | 0 | 4.535138  | 0.830517  | -5.266776 | 167 | 1 | 0 | 4.469641   | -4.398505 | 2.046761  |
| 99  | 1 | 0 | 5.968032  | 0.413236  | -3.694006 | 168 | 6 | 0 | 8.271278   | -1.453189 | -1.461278 |
| 100 | 1 | 0 | 5.414871  | 2.090073  | -3.677599 | 169 | 1 | 0 | 7.792777   | -1.461717 | -2.448410 |
| 101 | 6 | 0 | 3.816901  | -0.524215 | -5.137033 | 170 | 1 | 0 | 8.097754   | -0.460237 | -1.035259 |
| 102 | 1 | 0 | 2.142608  | -0.327460 | -3.724380 | 171 | 1 | 0 | 9.347574   | -1.574186 | -1.621830 |
| 103 | 1 | 0 | 3.346503  | -1.497461 | -3.220346 | 172 | 6 | 0 | 8.964532   | -5.998585 | 0.582070  |
| 104 | 1 | 0 | 3.813779  | 1.621595  | -5.513043 | 173 | 1 | 0 | 10.031465  | -5.780831 | 0.461768  |
| 105 | 1 | 0 | 5.306948  | 0.837026  | -6.045187 | 174 | 1 | 0 | 8.824201   | -6.473203 | 1.559304  |
| 106 | 1 | 0 | 3.059205  | -0.681717 | -5.912720 | 175 | 1 | 0 | 8.698453   | -6.742471 | -0.181294 |
| 107 | 1 | 0 | 4.550956  | -1.334243 | -5.240899 |     |   |   |            |           |           |
| 108 | 6 | 0 | -3.938600 | 2.824898  | -1.629406 |     |   |   |            |           |           |
| 109 | 6 | 0 | -3.351355 | 2.449592  | -3.009109 |     |   |   |            |           |           |
| 110 | 6 | 0 | -5.162521 | 3.696549  | -2.010232 |     |   |   |            |           |           |
| 111 | 1 | 0 | -3.213970 | 3.485165  | -1.144593 |     |   |   |            |           |           |
| 112 | 6 | 0 | -3.445400 | 3.763908  | -3.804964 |     |   |   |            |           |           |
| 113 | 1 | 0 | -3.971955 | 1.673332  | -3.477818 |     |   |   |            |           |           |
| 114 | 1 | 0 | -2.331785 | 2.059193  | -2.933890 |     |   |   |            |           |           |
| 115 | 6 | 0 | -4.727430 | 4.475897  | -3.281136 |     |   |   |            |           |           |
| 116 | 1 | 0 | -5.466864 | 4.354781  | -1.189018 |     |   |   |            |           |           |
| 117 | 1 | 0 | -6.022483 | 3.054920  | -2.234924 |     |   |   |            |           |           |
| 118 | 1 | 0 | -2.561717 | 4.379994  | -3.597760 |     |   |   |            |           |           |
| 119 | 1 | 0 | -3.467337 | 3.598995  | -4.887692 |     |   |   |            |           |           |
| 120 | 1 | 0 | -4.522432 | 5.527532  | -3.052717 |     |   |   |            |           |           |
| 121 | 1 | 0 | -5.524995 | 4.471596  | -4.032182 |     |   |   |            |           |           |
| 122 | 6 | 0 | -3.300702 | 0.199770  | 2.754903  |     |   |   |            |           |           |
| 123 | 6 | 0 | -4.296623 | 0.442224  | 3.934296  |     |   |   |            |           |           |
| 124 | 6 | 0 | -2.705175 | -1.190601 | 3.069250  |     |   |   |            |           |           |
| 125 | 1 | 0 | -2.477478 | 0.910927  | 2.861280  |     |   |   |            |           |           |
| 126 | 6 | 0 | -3.817328 | -0.466770 | 5.103298  |     |   |   |            |           |           |
| 127 | 1 | 0 | -5.315843 | 0.177750  | 3.630286  |     |   |   |            |           |           |
| 128 | 1 | 0 | -4.319746 | 1.500583  | 4.215540  |     |   |   |            |           |           |
| 129 | 6 | 0 | -2.529751 | -1.152972 | 4.593891  |     |   |   |            |           |           |
| 130 | 1 | 0 | -1.768129 | -1.360804 | 2.533495  |     |   |   |            |           |           |
| 131 | 1 | 0 | -3.400001 | -1.993811 | 2.795149  |     |   |   |            |           |           |
| 132 | 1 | 0 | -3.647626 | 0.096321  | 6.027472  |     |   |   |            |           |           |
| 133 | 1 | 0 | -4.580439 | -1.220696 | 5.330691  |     |   |   |            |           |           |
| 134 | 1 | 0 | -1.651479 | -0.544319 | 4.845983  |     |   |   |            |           |           |
| 135 | 1 | 0 | -2.373381 | -2.144872 | 5.032154  |     |   |   |            |           |           |
| 136 | 6 | 0 | 6.517625  | -2.431807 | 0.133948  |     |   |   |            |           |           |
| 137 | 6 | 0 | 7.745529  | -2.551710 | -0.560130 |     |   |   |            |           |           |
| 138 | 6 | 0 | 6.117690  | -3.468993 | 1.007258  |     |   |   |            |           |           |
| 139 | 6 | 0 | 8.522474  | -3.701123 | -0.387975 |     |   |   |            |           |           |
| 140 | 6 | 0 | 6.923004  | -4.606250 | 1.138962  |     |   |   |            |           |           |

TS-2nd-(S)-reaction pathway: S-si/(S)-1be (SPINOL)

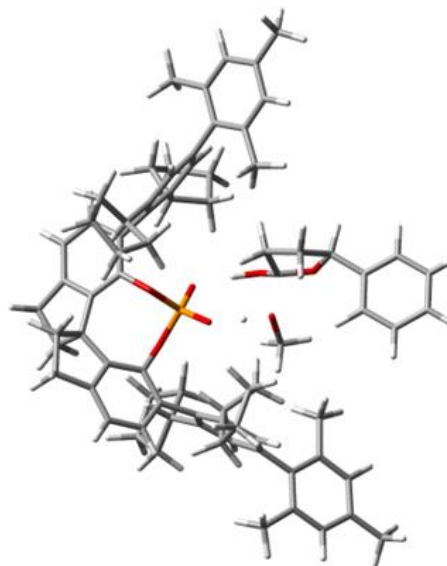

B3LYP/6-31G(d); E(B3LYP) = - 3893.99025248 hartree  
Zero-point Energy Correction = 1.501912 hartree  
Thermal Correction to Energy = 1.583073 hartree  
Thermal correction to Enthalpy = 1.584018 hartree  
Thermal correction to Gibbs Free Energy = 1.371627 hartree

| Sum of electronic and Zero-point Energies = -3892.488341 hartree   | 61     | 1      | 0                       | 2.947943  | 1.875361  | -0.126572 |
|--------------------------------------------------------------------|--------|--------|-------------------------|-----------|-----------|-----------|
| Sum of electronic and thermal Energies = -3892.407179 hartree      | 62     | 1      | 0                       | 2.108491  | 1.418041  | -1.641821 |
| Sum of electronic and thermal Enthalpies = -3892.406235 hartree    | 63     | 1      | 0                       | 2.293634  | 3.145030  | -1.214203 |
| Sum of electronic and thermal Free Energies = -3892.618625 hartree | 64     | 6      | 0                       | 0.057284  | 5.895240  | 0.147531  |
| The number of Imaginary frequencies = 1                            | 65     | 6      | 0                       | 1.250531  | 5.602956  | 0.823808  |
| -----                                                              |        |        |                         |           |           |           |
| Center                                                             | Atomic | Atomic | Coordinates (Angstroms) |           |           |           |
| Number                                                             | Number | Type   | X                       | Y         | Z         |           |
| -----                                                              |        |        |                         |           |           |           |
| 1                                                                  | 6      | 0      | -1.315972               | -4.226992 | -0.271556 |           |
| 2                                                                  | 6      | 0      | -1.902296               | -2.970238 | -0.129521 |           |
| 3                                                                  | 6      | 0      | -3.784796               | -3.712394 | -1.428971 |           |
| 4                                                                  | 6      | 0      | -3.150101               | -4.925147 | -1.696328 |           |
| 5                                                                  | 6      | 0      | -1.912519               | -5.175713 | -1.116269 |           |
| 6                                                                  | 1      | 0      | -4.775832               | -3.524587 | -1.830125 |           |
| 7                                                                  | 1      | 0      | -3.627547               | -5.663744 | -2.335545 |           |
| 8                                                                  | 6      | 0      | -1.033147               | -6.400656 | -1.248813 |           |
| 9                                                                  | 1      | 0      | -1.452292               | -7.256845 | -0.701906 |           |
| 10                                                                 | 1      | 0      | -0.918151               | -6.720901 | -2.290830 |           |
| 11                                                                 | 6      | 0      | -0.129887               | -4.863381 | 0.443941  |           |
| 12                                                                 | 6      | 0      | 0.296907                | -5.927531 | -0.621678 |           |
| 13                                                                 | 1      | 0      | 0.912849                | -5.435501 | -1.383265 |           |
| 14                                                                 | 1      | 0      | 0.887675                | -6.741071 | -0.188993 |           |
| 15                                                                 | 6      | 0      | -0.607335               | -5.593508 | 1.745913  |           |
| 16                                                                 | 1      | 0      | -1.216498               | -4.897600 | 2.334435  |           |
| 17                                                                 | 1      | 0      | -1.221235               | -6.473596 | 1.531345  |           |
| 18                                                                 | 6      | 0      | 0.692431                | -5.920426 | 2.508618  |           |
| 19                                                                 | 1      | 0      | 1.100113                | -6.895345 | 2.206158  |           |
| 20                                                                 | 1      | 0      | 0.548227                | -5.963584 | 3.594355  |           |
| 21                                                                 | 6      | 0      | 1.605220                | -4.789572 | 2.089647  |           |
| 22                                                                 | 6      | 0      | 1.072565                | -4.100124 | 0.989173  |           |
| 23                                                                 | 6      | 0      | 2.820244                | -4.407358 | 2.644715  |           |
| 24                                                                 | 1      | 0      | 3.247078                | -4.951203 | 3.483792  |           |
| 25                                                                 | 6      | 0      | 1.710025                | -2.948495 | 0.524589  |           |
| 26                                                                 | 6      | 0      | 3.494269                | -3.318027 | 2.097372  |           |
| 27                                                                 | 1      | 0      | 4.464509                | -3.032965 | 2.492160  |           |
| 28                                                                 | 8      | 0      | -1.218440               | -1.979786 | 0.581344  |           |
| 29                                                                 | 8      | 0      | 1.122928                | -2.226782 | -0.513301 |           |
| 30                                                                 | 15     | 0      | -0.060924               | -1.129079 | -0.212212 |           |
| 31                                                                 | 8      | 0      | 0.415001                | -0.099445 | 0.810608  |           |
| 32                                                                 | 8      | 0      | -0.526408               | -0.639525 | -1.556287 |           |
| 33                                                                 | 6      | 0      | -3.174543               | -2.699044 | -0.670212 |           |
| 34                                                                 | 6      | 0      | 2.954422                | -2.548050 | 1.051700  |           |
| 35                                                                 | 6      | 0      | -3.945637               | -1.432471 | -0.430352 |           |
| 36                                                                 | 6      | 0      | -5.378847               | -0.100475 | 1.007472  |           |
| 37                                                                 | 6      | 0      | -5.134808               | 0.497773  | -1.296371 |           |
| 38                                                                 | 6      | 0      | -5.729681               | 0.739227  | -0.053629 |           |
| 39                                                                 | 1      | 0      | -5.833321               | 0.072910  | 1.979389  |           |
| 40                                                                 | 1      | 0      | -5.383088               | 1.151581  | -2.129079 |           |
| 41                                                                 | 6      | 0      | 3.785774                | -1.400291 | 0.551625  |           |
| 42                                                                 | 6      | 0      | 5.076821                | 0.597799  | 1.046813  |           |
| 43                                                                 | 6      | 0      | 5.392228                | -0.523588 | -1.043785 |           |
| 44                                                                 | 6      | 0      | 5.761480                | 0.502547  | -0.169394 |           |
| 45                                                                 | 1      | 0      | 5.338863                | 1.402998  | 1.728804  |           |
| 46                                                                 | 1      | 0      | 5.910992                | -0.605161 | -1.995467 |           |
| 47                                                                 | 6      | 0      | -0.410028               | 2.620617  | -1.027153 |           |
| 48                                                                 | 8      | 0      | -0.159772               | 3.925386  | -1.286114 |           |
| 49                                                                 | 8      | 0      | 0.911638                | 2.137480  | -0.077718 |           |
| 50                                                                 | 1      | 0      | -0.497181               | 0.906264  | -1.923539 |           |
| 51                                                                 | 6      | 0      | -0.857013               | 4.794364  | -0.331582 |           |
| 52                                                                 | 6      | 0      | -1.400666               | 3.835730  | 0.746176  |           |
| 53                                                                 | 6      | 0      | -1.548813               | 2.517125  | -0.019638 |           |
| 54                                                                 | 1      | 0      | -1.687279               | 5.235722  | -0.895090 |           |
| 55                                                                 | 1      | 0      | -0.679036               | 3.728036  | 1.560208  |           |
| 56                                                                 | 1      | 0      | -2.339057               | 4.202025  | 1.168954  |           |
| 57                                                                 | 1      | 0      | -1.489535               | 1.622148  | 0.600898  |           |
| 58                                                                 | 1      | 0      | -2.481528               | 2.475755  | -0.593482 |           |
| 59                                                                 | 8      | 0      | -0.360049               | 1.891854  | -2.129215 |           |
| 60                                                                 | 6      | 0      | 2.150812                | 2.138082  | -0.821709 |           |
| 61                                                                 | 1      | 0      | 2.947943                | 1.875361  | -0.126572 |           |
| 62                                                                 | 1      | 0      | 2.108491                | 1.418041  | -1.641821 |           |
| 63                                                                 | 1      | 0      | 2.293634                | 3.145030  | -1.214203 |           |
| 64                                                                 | 6      | 0      | 0.057284                | 5.895240  | 0.147531  |           |
| 65                                                                 | 6      | 0      | 1.250531                | 5.602956  | 0.823808  |           |
| 66                                                                 | 6      | 0      | -0.289889               | 7.232529  | -0.067689 |           |
| 67                                                                 | 6      | 0      | 2.075835                | 6.631412  | 1.273776  |           |
| 68                                                                 | 1      | 0      | 1.531937                | 4.567520  | 0.993150  |           |
| 69                                                                 | 6      | 0      | 0.531454                | 8.264793  | 0.390624  |           |
| 70                                                                 | 1      | 0      | -1.208789               | 7.469015  | -0.599556 |           |
| 71                                                                 | 6      | 0      | 1.717168                | 7.965562  | 1.060733  |           |
| 72                                                                 | 1      | 0      | 3.000143                | 6.392919  | 1.793171  |           |
| 73                                                                 | 1      | 0      | 0.246971                | 9.299126  | 0.217569  |           |
| 74                                                                 | 1      | 0      | 2.361186                | 8.766048  | 1.414725  |           |
| 75                                                                 | 1      | 0      | 0.714775                | 1.129830  | 0.315075  |           |
| 76                                                                 | 6      | 0      | -6.741322               | 1.830318  | 0.125661  |           |
| 77                                                                 | 6      | 0      | -8.671559               | 3.881883  | 0.448204  |           |
| 78                                                                 | 6      | 0      | 6.904933                | 1.418378  | -0.493612 |           |
| 79                                                                 | 6      | 0      | 9.109211                | 3.093269  | -1.092959 |           |
| 80                                                                 | 6      | 0      | 4.425474                | -1.481458 | -0.710541 |           |
| 81                                                                 | 6      | 0      | 4.141502                | -2.596056 | -1.703671 |           |
| 82                                                                 | 6      | 0      | 3.562384                | -2.135333 | -3.061147 |           |
| 83                                                                 | 6      | 0      | 5.365710                | -3.443674 | -2.132706 |           |
| 84                                                                 | 1      | 0      | 3.414102                | -3.283803 | -1.264726 |           |
| 85                                                                 | 6      | 0      | 3.660502                | -3.397281 | -3.938958 |           |
| 86                                                                 | 1      | 0      | 4.185869                | -1.331544 | -3.476475 |           |
| 87                                                                 | 1      | 0      | 2.541618                | -1.751850 | -2.968927 |           |
| 88                                                                 | 6      | 0      | 4.922535                | -4.159947 | -3.435973 |           |
| 89                                                                 | 1      | 0      | 5.677828                | -4.140479 | -1.346912 |           |
| 90                                                                 | 1      | 0      | 6.221890                | -2.788959 | -2.333008 |           |
| 91                                                                 | 1      | 0      | 2.765152                | -4.013782 | -3.793898 |           |
| 92                                                                 | 1      | 0      | 3.709843                | -3.160086 | -5.007151 |           |
| 93                                                                 | 1      | 0      | 4.688774                | -5.213717 | -3.248175 |           |
| 94                                                                 | 1      | 0      | 5.725866                | -4.148479 | -4.180682 |           |
| 95                                                                 | 6      | 0      | 4.089706                | -0.323145 | 1.424358  |           |
| 96                                                                 | 6      | 0      | 3.395697                | -0.143715 | 2.768250  |           |
| 97                                                                 | 6      | 0      | 4.302875                | -0.364164 | 4.011979  |           |
| 98                                                                 | 6      | 0      | 2.788009                | 1.252674  | 3.037629  |           |
| 99                                                                 | 1      | 0      | 2.565730                | -0.853883 | 2.822664  |           |
| 100                                                                | 6      | 0      | 3.628832                | 0.415598  | 5.177086  |           |
| 101                                                                | 1      | 0      | 5.304981                | 0.034619  | 3.813150  |           |
| 102                                                                | 1      | 0      | 4.427173                | -1.428657 | 4.236225  |           |
| 103                                                                | 6      | 0      | 2.454153                | 1.201254  | 4.536632  |           |
| 104                                                                | 1      | 0      | 1.914299                | 1.449300  | 2.410702  |           |
| 105                                                                | 1      | 0      | 3.528075                | 2.041226  | 2.843793  |           |
| 106                                                                | 1      | 0      | 3.276019                | -0.255049 | 5.967875  |           |
| 107                                                                | 1      | 0      | 4.346307                | 1.099000  | 5.645510  |           |
| 108                                                                | 1      | 0      | 1.513659                | 0.654406  | 4.677596  |           |
| 109                                                                | 1      | 0      | 2.317429                | 2.194385  | 4.978876  |           |
| 110                                                                | 6      | 0      | -4.500314               | -1.178861 | 0.849805  |           |
| 111                                                                | 6      | 0      | -4.208938               | -2.053572 | 2.058722  |           |
| 112                                                                | 6      | 0      | -3.512851               | -1.337387 | 3.238136  |           |
| 113                                                                | 6      | 0      | -5.448824               | -2.702549 | 2.731480  |           |
| 114                                                                | 1      | 0      | -3.548155               | -2.868519 | 1.751799  |           |
| 115                                                                | 6      | 0      | -3.622388               | -2.359931 | 4.380628  |           |
| 116                                                                | 1      | 0      | -4.059400               | -0.419266 | 3.494453  |           |
| 117                                                                | 1      | 0      | -2.482052               | -1.055976 | 3.001623  |           |
| 118                                                                | 6      | 0      | -5.007401               | -3.037879 | 4.185095  |           |
| 119                                                                | 1      | 0      | -5.791498               | -3.583225 | 2.177323  |           |
| 120                                                                | 1      | 0      | -6.284994               | -1.994578 | 2.742241  |           |
| 121                                                                | 1      | 0      | -2.821756               | -3.104009 | 4.279746  |           |
| 122                                                                | 1      | 0      | -3.509882               | -1.905767 | 5.371279  |           |
| 123                                                                | 1      | 0      | -4.945517               | -4.118714 | 4.352062  |           |
| 124                                                                | 1      | 0      | -5.738180               | -2.654156 | 4.905836  |           |
| 125                                                                | 6      | 0      | -4.252642               | -0.569527 | -1.512155 |           |
| 126                                                                | 6      | 0      | -3.697620               | -0.783694 | -2.915083 |           |
| 127                                                                | 6      | 0      | -4.756206               | -1.325558 | -3.923285 |           |
| 128                                                                | 6      | 0      | -3.116826               | 0.497071  | -3.613836 |           |
| 129                                                                | 1      | 0      | -2.887086               | -1.511323 | -2.849166 |           |

|     |   |   |            |           |           |
|-----|---|---|------------|-----------|-----------|
| 130 | 6 | 0 | -4.283104  | -0.820312 | -5.293433 |
| 131 | 1 | 0 | -5.742367  | -0.898713 | -3.695608 |
| 132 | 1 | 0 | -4.856016  | -2.414990 | -3.873936 |
| 133 | 6 | 0 | -3.821465  | 0.612352  | -4.984822 |
| 134 | 1 | 0 | -2.039340  | 0.369175  | -3.746375 |
| 135 | 1 | 0 | -3.248499  | 1.400173  | -3.011100 |
| 136 | 1 | 0 | -3.434306  | -1.423322 | -5.643921 |
| 137 | 1 | 0 | -5.061958  | -0.870333 | -6.063331 |
| 138 | 1 | 0 | -3.172689  | 1.036386  | -5.759176 |
| 139 | 1 | 0 | -4.700965  | 1.266749  | -4.908467 |
| 140 | 6 | 0 | 7.875843   | 3.270702  | -1.722356 |
| 141 | 1 | 0 | 7.763985   | 4.067007  | -2.456082 |
| 142 | 6 | 0 | 6.773621   | 2.455295  | -1.440933 |
| 143 | 6 | 0 | 8.149833   | 1.215216  | 0.144481  |
| 144 | 6 | 0 | 9.224343   | 2.054129  | -0.165981 |
| 145 | 1 | 0 | 10.181253  | 1.882978  | 0.324123  |
| 146 | 6 | 0 | -7.996899  | 1.738890  | -0.520179 |
| 147 | 6 | 0 | -8.932870  | 2.762328  | -0.346801 |
| 148 | 1 | 0 | -9.897141  | 2.679189  | -0.845448 |
| 149 | 6 | 0 | -7.430632  | 3.953088  | 1.081871  |
| 150 | 1 | 0 | -7.200746  | 4.816728  | 1.703750  |
| 151 | 6 | 0 | -6.466998  | 2.947079  | 0.943109  |
| 152 | 6 | 0 | -5.152827  | 3.092757  | 1.678645  |
| 153 | 1 | 0 | -5.142082  | 2.517817  | 2.613559  |
| 154 | 1 | 0 | -4.311750  | 2.730591  | 1.081198  |
| 155 | 1 | 0 | -4.971043  | 4.140627  | 1.941581  |
| 156 | 6 | 0 | -8.367230  | 0.547078  | -1.377921 |
| 157 | 1 | 0 | -7.850253  | 0.557194  | -2.344980 |
| 158 | 1 | 0 | -8.103725  | -0.397789 | -0.891188 |
| 159 | 1 | 0 | -9.442962  | 0.539517  | -1.580775 |
| 160 | 6 | 0 | -9.711049  | 4.962803  | 0.634764  |
| 161 | 1 | 0 | -10.463407 | 4.669352  | 1.379233  |
| 162 | 1 | 0 | -9.258543  | 5.898294  | 0.980198  |
| 163 | 1 | 0 | -10.246680 | 5.170641  | -0.298460 |
| 164 | 6 | 0 | 5.461896   | 2.729800  | -2.142466 |
| 165 | 1 | 0 | 5.009531   | 1.819804  | -2.548300 |
| 166 | 1 | 0 | 4.730919   | 3.170225  | -1.453023 |
| 167 | 1 | 0 | 5.600935   | 3.436388  | -2.966640 |
| 168 | 6 | 0 | 8.354294   | 0.090600  | 1.137019  |
| 169 | 1 | 0 | 7.781202   | 0.246143  | 2.058790  |
| 170 | 1 | 0 | 8.029718   | -0.872276 | 0.726816  |
| 171 | 1 | 0 | 9.410242   | 0.005210  | 1.412181  |
| 172 | 6 | 0 | 10.277590  | 4.004122  | -1.390772 |
| 173 | 1 | 0 | 10.194748  | 4.449835  | -2.387730 |
| 174 | 1 | 0 | 10.334577  | 4.830154  | -0.668842 |
| 175 | 1 | 0 | 11.230104  | 3.465145  | -1.338974 |

B3LYP/6-31G(d); E(B3LYP) = -3893.99032101 hartree  
 Zero-point Energy Correction = 1.501064 hartree  
 Thermal Correction to Energy = 1.582241 hartree  
 Thermal correction to Enthalpy = 1.583185 hartree  
 Thermal correction to Gibbs Free Energy= 1.373218 hartree  
 Sum of electronic and Zero-point Energies = -3892.489257 hartree  
 Sum of electronic and thermal Energies = -3892.408080hartree  
 Sum of electronic and thermal Enthalpies = -3892.407136 hartree  
 Sum of electronic and thermal Free Energies= -3892.617103 hartree  
 The number of Imaginary frequencies = 1

| Center Number | Atomic Number | Atomic Type | Coordinates (Angstroms) |           |           |
|---------------|---------------|-------------|-------------------------|-----------|-----------|
|               |               |             | X                       | Y         | Z         |
| 1             | 6             | 0           | -1.314238               | 3.780856  | 0.716880  |
| 2             | 6             | 0           | -1.966205               | 2.624234  | 0.300436  |
| 3             | 6             | 0           | -3.814569               | 3.144197  | 1.742221  |
| 4             | 6             | 0           | -3.118072               | 4.232308  | 2.271389  |
| 5             | 6             | 0           | -1.863822               | 4.543640  | 1.758529  |
| 6             | 1             | 0           | -4.814166               | 2.920201  | 2.101657  |
| 7             | 1             | 0           | -3.561302               | 4.830685  | 3.063697  |
| 8             | 6             | 0           | -0.916248               | 5.656354  | 2.156253  |
| 9             | 1             | 0           | -1.285327               | 6.636527  | 1.823365  |
| 10            | 1             | 0           | -0.784509               | 5.724873  | 3.242414  |
| 11            | 6             | 0           | -0.095291               | 4.496652  | 0.149276  |
| 12            | 6             | 0           | 0.387946                | 5.266668  | 1.422821  |
| 13            | 1             | 0           | 0.975570                | 4.582763  | 2.046161  |
| 14            | 1             | 0           | 1.022555                | 6.124433  | 1.178749  |
| 15            | 6             | 0           | -0.540767               | 5.528497  | -0.943541 |
| 16            | 1             | 0           | -1.192980               | 5.017641  | -1.661379 |
| 17            | 1             | 0           | -1.103199               | 6.366947  | -0.521713 |
| 18            | 6             | 0           | 0.767483                | 5.950664  | -1.639510 |
| 19            | 1             | 0           | 1.235513                | 6.805443  | -1.130798 |
| 20            | 1             | 0           | 0.616116                | 6.250507  | -2.682815 |
| 21            | 6             | 0           | 1.615109                | 4.705191  | -1.512524 |
| 22            | 6             | 0           | 1.060262                | 3.812990  | -0.580547 |
| 23            | 6             | 0           | 2.790207                | 4.393908  | -2.184349 |
| 24            | 1             | 0           | 3.227650                | 5.089922  | -2.895816 |
| 25            | 6             | 0           | 1.640017                | 2.552463  | -0.411504 |
| 26            | 8             | 0           | -1.332768               | 1.789448  | -0.623840 |
| 27            | 8             | 0           | 1.026747                | 1.634977  | 0.445341  |
| 28            | 15            | 0           | -0.224448               | 0.713535  | -0.094605 |
| 29            | 8             | 0           | 0.168047                | -0.138387 | -1.271380 |
| 30            | 8             | 0           | -0.725654               | 0.016935  | 1.169433  |
| 31            | 6             | 0           | -3.252353               | 2.297450  | 0.772693  |
| 32            | 6             | 0           | 2.847318                | 2.218097  | -1.057357 |
| 33            | 6             | 0           | -4.026521               | 1.119325  | 0.259592  |
| 34            | 6             | 0           | 3.408262                | 3.173133  | -1.923806 |
| 35            | 1             | 0           | 4.346695                | 2.929322  | -2.412244 |
| 36            | 6             | 0           | 3.638765                | 0.952767  | -0.859439 |
| 37            | 6             | 0           | 0.066853                | -3.107259 | 0.119094  |
| 38            | 8             | 0           | -0.435176               | -2.378345 | 1.531135  |
| 39            | 6             | 0           | 0.674240                | -2.642328 | 2.456694  |
| 40            | 6             | 0           | 1.581273                | -2.847552 | 0.195763  |
| 41            | 1             | 0           | 2.079769                | -3.792853 | -0.031159 |
| 42            | 1             | 0           | 1.862310                | -2.118122 | -0.565146 |
| 43            | 8             | 0           | -0.661161               | -2.577961 | -0.860215 |
| 44            | 8             | 0           | -0.192964               | -4.420423 | 0.332889  |
| 45            | 6             | 0           | -1.563147               | -4.837076 | 0.198261  |
| 46            | 1             | 0           | -1.576371               | -5.882642 | 0.509202  |
| 47            | 1             | 0           | -1.894295               | -4.745492 | -0.837973 |
| 48            | 1             | 0           | -2.210003               | -4.241957 | 0.849067  |
| 49            | 1             | 0           | -0.583623               | -1.266631 | 1.347288  |
| 50            | 1             | 0           | -0.346512               | -1.645619 | -1.100333 |
| 51            | 6             | 0           | 0.532034                | -1.930507 | 3.781378  |
| 52            | 6             | 0           | 0.674524                | -0.540545 | 3.912955  |
| 53            | 6             | 0           | 0.280863                | -2.695020 | 4.928607  |
| 54            | 6             | 0           | 0.564592                | 0.061327  | 5.166506  |

TS-1st-(S)-reaction pathway: S-syn/(S)-Ibe (SPINOL)

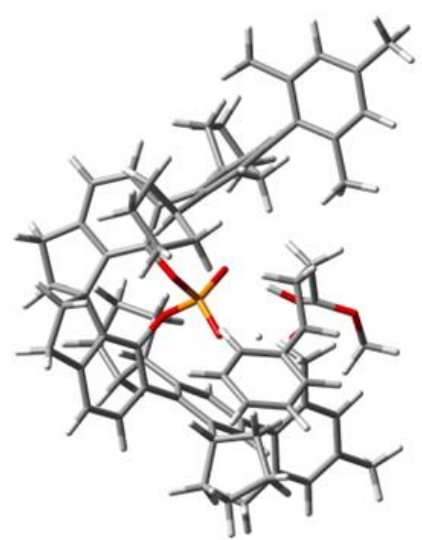

|     |   |   |           |           |           |     |   |   |           |           |           |
|-----|---|---|-----------|-----------|-----------|-----|---|---|-----------|-----------|-----------|
| 55  | 1 | 0 | 0.835638  | 0.077124  | 3.036606  | 124 | 6 | 0 | -5.480816 | 2.924188  | -2.630367 |
| 56  | 6 | 0 | 0.176815  | -2.093077 | 6.183207  | 125 | 1 | 0 | -3.632381 | 3.011535  | -1.550826 |
| 57  | 1 | 0 | 0.168237  | -3.773034 | 4.838144  | 126 | 6 | 0 | -3.586406 | 3.105647  | -4.226939 |
| 58  | 6 | 0 | 0.319172  | -0.710648 | 6.304202  | 127 | 1 | 0 | -3.908529 | 0.990968  | -3.820419 |
| 59  | 1 | 0 | 0.669563  | 1.139358  | 5.252223  | 128 | 1 | 0 | -2.395051 | 1.591278  | -3.130843 |
| 60  | 1 | 0 | -0.015349 | -2.703356 | 7.061499  | 129 | 6 | 0 | -5.000727 | 3.671866  | -3.904399 |
| 61  | 1 | 0 | 0.237951  | -0.236528 | 7.278696  | 130 | 1 | 0 | -5.952006 | 3.588156  | -1.897149 |
| 62  | 1 | 0 | 0.611805  | -3.719367 | 2.633593  | 131 | 1 | 0 | -6.226750 | 2.165230  | -2.893765 |
| 63  | 6 | 0 | 1.917410  | -2.337325 | 1.614170  | 132 | 1 | 0 | -2.817452 | 3.841197  | -3.958272 |
| 64  | 1 | 0 | 2.804719  | -2.815869 | 2.035875  | 133 | 1 | 0 | -3.453110 | 2.885190  | -5.291695 |
| 65  | 1 | 0 | 2.105226  | -1.260063 | 1.592259  | 134 | 1 | 0 | -4.959800 | 4.754473  | -3.741301 |
| 66  | 6 | 0 | -5.551754 | -1.065771 | -0.699547 | 135 | 1 | 0 | -5.696074 | 3.509414  | -4.735318 |
| 67  | 6 | 0 | 5.588698  | -1.096587 | -0.740221 | 136 | 6 | 0 | -6.339272 | -2.232924 | -1.210549 |
| 68  | 6 | 0 | -4.359086 | 0.049311  | 1.127403  | 137 | 6 | 0 | -7.704431 | -2.370067 | -0.880408 |
| 69  | 6 | 0 | -5.116662 | -1.016587 | 0.626324  | 138 | 6 | 0 | -5.715153 | -3.204725 | -2.021269 |
| 70  | 1 | 0 | -5.367248 | -1.842976 | 1.287215  | 139 | 6 | 0 | -8.416035 | -3.474247 | -1.360430 |
| 71  | 6 | 0 | -5.225408 | 0.005639  | -1.534162 | 140 | 6 | 0 | -6.463524 | -4.296236 | -2.475822 |
| 72  | 1 | 0 | -5.574048 | -0.013263 | -2.563585 | 141 | 6 | 0 | -7.815709 | -4.449907 | -2.160678 |
| 73  | 6 | 0 | -4.477741 | 1.099710  | -1.085239 | 142 | 1 | 0 | -9.469282 | -3.572221 | -1.102658 |
| 74  | 6 | 0 | 4.729666  | -0.981284 | -1.837528 | 143 | 1 | 0 | -5.973531 | -5.047387 | -3.093208 |
| 75  | 1 | 0 | 4.850398  | -1.674125 | -2.666119 | 144 | 6 | 0 | 6.721378  | -2.081434 | -0.747784 |
| 76  | 6 | 0 | 3.754387  | 0.021836  | -1.922382 | 145 | 6 | 0 | 7.910303  | -1.759671 | -1.440171 |
| 77  | 6 | 0 | 5.407155  | -0.212953 | 0.327864  | 146 | 6 | 0 | 6.626869  | -3.313201 | -0.701168 |
| 78  | 1 | 0 | 6.068033  | -0.294405 | 1.186935  | 147 | 6 | 0 | 8.968195  | -2.673863 | -1.444961 |
| 79  | 6 | 0 | 4.450146  | 0.810481  | 0.293406  | 148 | 6 | 0 | 7.707844  | -4.201240 | -0.102070 |
| 80  | 6 | 0 | 4.388690  | 1.799358  | 1.447138  | 149 | 6 | 0 | 8.887583  | -3.904284 | -0.786965 |
| 81  | 6 | 0 | 4.369091  | 1.208498  | 2.873284  | 150 | 1 | 0 | 9.882473  | -2.414297 | -1.975939 |
| 82  | 6 | 0 | 5.589045  | 2.778927  | 1.514793  | 151 | 1 | 0 | 7.622701  | -5.150589 | 0.423721  |
| 83  | 1 | 0 | 3.481604  | 2.402311  | 1.344670  | 152 | 6 | 0 | 8.066983  | -0.439290 | -2.162778 |
| 84  | 6 | 0 | 4.616598  | 2.435208  | 3.771985  | 153 | 1 | 0 | 7.367058  | -0.347741 | -3.001736 |
| 85  | 1 | 0 | 5.181946  | 0.481830  | 2.998040  | 154 | 1 | 0 | 7.869260  | 0.409649  | -1.498380 |
| 86  | 1 | 0 | 3.432109  | 0.690609  | 3.105156  | 155 | 1 | 0 | 9.081410  | -0.331768 | -2.559465 |
| 87  | 6 | 0 | 5.549168  | 3.372267  | 2.947586  | 156 | 6 | 0 | 5.376933  | -3.691917 | 0.690518  |
| 88  | 1 | 0 | 5.539760  | 3.542593  | 0.731241  | 157 | 1 | 0 | 5.203247  | -3.020468 | 1.540061  |
| 89  | 1 | 0 | 6.519046  | 2.218437  | 1.357633  | 158 | 1 | 0 | 4.488551  | -3.630886 | 0.052316  |
| 90  | 1 | 0 | 3.664088  | 2.939296  | 3.976742  | 159 | 1 | 0 | 5.448649  | -4.712893 | 1.078711  |
| 91  | 1 | 0 | 5.043891  | 2.161989  | 4.742727  | 160 | 6 | 0 | 10.033503 | -4.888203 | -0.835506 |
| 92  | 1 | 0 | 5.161856  | 4.396969  | 2.942036  | 161 | 1 | 0 | 9.992744  | -5.593136 | 0.001601  |
| 93  | 1 | 0 | 6.554801  | 3.422108  | 3.379030  | 162 | 1 | 0 | 10.013514 | -5.479383 | -1.761051 |
| 94  | 6 | 0 | 2.892294  | 0.112974  | -3.173189 | 163 | 1 | 0 | 11.002530 | -4.377701 | -0.801008 |
| 95  | 6 | 0 | 3.639861  | 0.609606  | -4.443012 | 164 | 6 | 0 | -4.255938 | -3.089720 | -2.406327 |
| 96  | 6 | 0 | 2.245901  | -1.203736 | -3.658946 | 165 | 1 | 0 | -4.088973 | -2.276085 | -3.122736 |
| 97  | 1 | 0 | 2.068071  | 0.802079  | -2.968349 | 166 | 1 | 0 | -3.614610 | -2.873557 | -1.545349 |
| 98  | 6 | 0 | 2.799687  | 0.108309  | -5.651982 | 167 | 1 | 0 | -3.904766 | -4.015417 | -2.874555 |
| 99  | 1 | 0 | 4.646638  | 0.174400  | -4.469220 | 168 | 6 | 0 | -8.413417 | -1.339267 | -0.028752 |
| 100 | 1 | 0 | 3.765692  | 1.697250  | -4.439885 | 169 | 1 | 0 | -8.044675 | -1.337106 | 1.003969  |
| 101 | 6 | 0 | 1.721167  | -0.835716 | -5.055800 | 170 | 1 | 0 | -8.261110 | -0.325384 | -0.415649 |
| 102 | 1 | 0 | 1.456996  | -1.547006 | -2.985303 | 171 | 1 | 0 | -9.490051 | -1.534699 | 0.002313  |
| 103 | 1 | 0 | 2.997067  | -2.001206 | -3.738460 | 172 | 6 | 0 | -8.612365 | -5.619329 | -2.692000 |
| 104 | 1 | 0 | 2.341916  | 0.938287  | -6.201020 | 173 | 1 | 0 | -9.094781 | -5.373285 | -3.647795 |
| 105 | 1 | 0 | 3.436819  | -0.424333 | -6.367229 | 174 | 1 | 0 | -7.974689 | -6.492679 | -2.867182 |
| 106 | 1 | 0 | 0.768310  | -0.302732 | -4.952321 | 175 | 1 | 0 | -9.406029 | -5.914085 | -1.996607 |
| 107 | 1 | 0 | 1.531940  | -1.712849 | -5.684414 |     |   |   |           |           |           |
| 108 | 6 | 0 | -3.950568 | 0.011158  | 2.594253  |     |   |   |           |           |           |
| 109 | 6 | 0 | -5.138752 | 0.261987  | 3.570600  |     |   |   |           |           |           |
| 110 | 6 | 0 | -3.326324 | -1.342904 | 3.084241  |     |   |   |           |           |           |
| 111 | 1 | 0 | -3.205881 | 0.790902  | 2.762242  |     |   |   |           |           |           |
| 112 | 6 | 0 | -4.746628 | -0.475418 | 4.858649  |     |   |   |           |           |           |
| 113 | 1 | 0 | -6.057270 | -0.178047 | 3.159757  |     |   |   |           |           |           |
| 114 | 1 | 0 | -5.334108 | 1.329304  | 3.723446  |     |   |   |           |           |           |
| 115 | 6 | 0 | -4.132266 | -1.780829 | 4.328768  |     |   |   |           |           |           |
| 116 | 1 | 0 | -2.280366 | -1.174307 | 3.350266  |     |   |   |           |           |           |
| 117 | 1 | 0 | -3.326483 | -2.106775 | 2.301935  |     |   |   |           |           |           |
| 118 | 1 | 0 | -3.988361 | 0.101017  | 5.406319  |     |   |   |           |           |           |
| 119 | 1 | 0 | -5.592375 | -0.635439 | 5.537643  |     |   |   |           |           |           |
| 120 | 1 | 0 | -3.512931 | -2.299184 | 5.069286  |     |   |   |           |           |           |
| 121 | 1 | 0 | -4.938113 | -2.470508 | 4.041721  |     |   |   |           |           |           |
| 122 | 6 | 0 | -4.213063 | 2.236419  | -2.059429 |     |   |   |           |           |           |
| 123 | 6 | 0 | -3.434981 | 1.857583  | -3.339857 |     |   |   |           |           |           |

TS-2nd-(S)-reaction pathway: S-re/(S)-1bc (SPINOL)

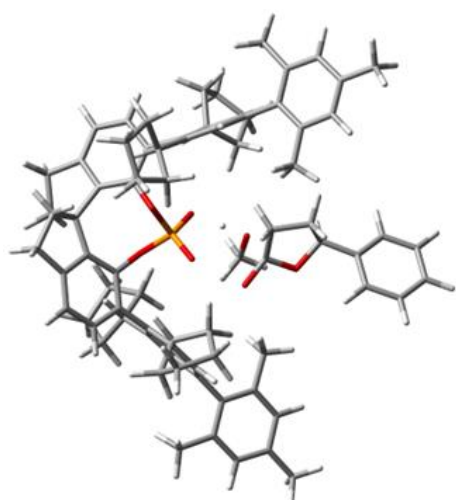

B3LYP/6-31G(d); E(B3LYP) = -3893.99441179 hartree  
 Zero-point Energy Correction = 1.502060 hartree  
 Thermal Correction to Energy = 1.583252 hartree  
 Thermal correction to Enthalpy = 1.584196 hartree  
 Thermal correction to Gibbs Free Energy = 1.372407 hartree  
 Sum of electronic and Zero-point Energies = -3892.492352 hartree  
 Sum of electronic and thermal Energies = -3892.411160 hartree  
 Sum of electronic and thermal Enthalpies = -3892.410215 hartree  
 Sum of electronic and thermal Free Energies = -3892.622004 hartree  
 The number of Imaginary frequencies = 1

| Center Number | Atomic Number | Atomic Type | Coordinates (Angstroms) |           |           |
|---------------|---------------|-------------|-------------------------|-----------|-----------|
|               |               |             | X                       | Y         | Z         |
| 1             | 6             | 0           | 0.465609                | 2.499323  | -0.230116 |
| 2             | 8             | 0           | 0.824748                | 3.761384  | -0.548665 |
| 3             | 8             | 0           | 0.229678                | 1.779631  | -1.790531 |
| 4             | 6             | 0           | -0.379523               | 4.547104  | -0.791860 |
| 5             | 6             | 0           | -1.391779               | 3.952425  | 0.209024  |
| 6             | 6             | 0           | -0.969220               | 2.473618  | 0.314070  |
| 7             | 1             | 0           | -0.702662               | 4.343023  | -1.819595 |
| 8             | 1             | 0           | -1.286092               | 4.458228  | 1.173661  |
| 9             | 1             | 0           | -2.421746               | 4.085922  | -0.130603 |
| 10            | 1             | 0           | -0.953348               | 2.099513  | 1.339849  |
| 11            | 1             | 0           | -1.604120               | 1.806816  | -0.270945 |
| 12            | 8             | 0           | 1.445922                | 1.835882  | 0.341900  |
| 13            | 6             | 0           | 1.429527                | 1.731491  | -2.589007 |
| 14            | 1             | 0           | 2.212495                | 1.163239  | -2.080631 |
| 15            | 1             | 0           | 1.169541                | 1.255654  | -3.537219 |
| 16            | 1             | 0           | 1.759313                | 2.756860  | -2.758736 |
| 17            | 1             | 0           | 1.109909                | 0.927266  | 0.675012  |
| 18            | 1             | 0           | -0.104378               | 0.763339  | -1.623305 |
| 19            | 6             | 0           | -1.284097               | -4.295967 | -0.862966 |
| 20            | 6             | 0           | -1.869219               | -3.086367 | -0.492379 |
| 21            | 6             | 0           | -3.735582               | -3.545858 | -1.936986 |
| 22            | 6             | 0           | -3.102626               | -4.691793 | -2.419989 |
| 23            | 6             | 0           | -1.874236               | -5.059083 | -1.883029 |
| 24            | 1             | 0           | -4.718351               | -3.276095 | -2.311122 |
| 25            | 1             | 0           | -3.573740               | -5.290649 | -3.195641 |
| 26            | 6             | 0           | -0.994883               | -6.238131 | -2.242119 |
| 27            | 1             | 0           | -1.418715               | -7.182320 | -1.872233 |
| 28            | 1             | 0           | -0.873043               | -6.353026 | -3.325441 |
| 29            | 6             | 0           | -0.101262               | -5.061159 | -0.276889 |
| 30            | 6             | 0           | 0.331403                | -5.897275 | -1.526819 |
| 31            | 1             | 0           | 0.951891                | -5.266427 | -2.173719 |
| 32            | 1             | 0           | 0.919689                | -6.779990 | -1.257012 |

|     |    |   |           |           |           |
|-----|----|---|-----------|-----------|-----------|
| 33  | 6  | 0 | -0.581459 | -6.031373 | 0.856846  |
| 34  | 1  | 0 | -1.198547 | -5.465241 | 1.564264  |
| 35  | 1  | 0 | -1.188349 | -6.856646 | 0.471778  |
| 36  | 6  | 0 | 0.716000  | -6.493160 | 1.552271  |
| 37  | 1  | 0 | 1.132422  | -7.388811 | 1.069665  |
| 38  | 1  | 0 | 0.563454  | -6.747622 | 2.607456  |
| 39  | 6  | 0 | 1.623374  | -5.296580 | 1.369811  |
| 40  | 6  | 0 | 1.095517  | -4.414793 | 0.414008  |
| 41  | 6  | 0 | 2.821971  | -5.010541 | 2.012571  |
| 42  | 1  | 0 | 3.242682  | -5.699907 | 2.740536  |
| 43  | 6  | 0 | 1.724067  | -3.189503 | 0.192963  |
| 44  | 6  | 0 | 3.481957  | -3.820405 | 1.709271  |
| 45  | 1  | 0 | 4.432404  | -3.595438 | 2.183534  |
| 46  | 8  | 0 | -1.202553 | -2.253502 | 0.407925  |
| 47  | 8  | 0 | 1.139745  | -2.286785 | -0.694674 |
| 48  | 15 | 0 | -0.028958 | -1.263735 | -0.160525 |
| 49  | 8  | 0 | 0.430774  | -0.439653 | 1.016164  |
| 50  | 8  | 0 | -0.494426 | -0.544902 | -1.419680 |
| 51  | 6  | 0 | -3.129977 | -2.702683 | -0.991136 |
| 52  | 6  | 0 | 2.943855  | -2.872372 | 0.822544  |
| 53  | 6  | 0 | -0.071808 | 6.012908  | -0.627075 |
| 54  | 6  | 0 | -0.673214 | 6.946280  | -1.477756 |
| 55  | 6  | 0 | 0.770937  | 6.464293  | 0.396885  |
| 56  | 6  | 0 | -0.449709 | 8.312880  | -1.302219 |
| 57  | 1  | 0 | -1.319416 | 6.603023  | -2.282861 |
| 58  | 6  | 0 | 1.003670  | 7.828578  | 0.564820  |
| 59  | 1  | 0 | 1.257654  | 5.742507  | 1.045944  |
| 60  | 6  | 0 | 0.390574  | 8.756636  | -0.280675 |
| 61  | 1  | 0 | -0.924355 | 9.027579  | -1.969034 |
| 62  | 1  | 0 | 1.666467  | 8.167848  | 1.356322  |
| 63  | 1  | 0 | 0.572334  | 9.819555  | -0.146838 |
| 64  | 6  | 0 | -3.864871 | -1.479995 | -0.521576 |
| 65  | 6  | 0 | -5.173970 | -0.341765 | 1.177820  |
| 66  | 6  | 0 | -4.914380 | 0.660561  | -0.978683 |
| 67  | 6  | 0 | -5.456584 | 0.714745  | 0.308577  |
| 68  | 1  | 0 | -5.594990 | -0.316560 | 2.179417  |
| 69  | 1  | 0 | -5.122954 | 1.477463  | -1.665593 |
| 70  | 6  | 0 | 3.710447  | -1.602514 | 0.586676  |
| 71  | 6  | 0 | 4.726818  | 0.421059  | 1.456673  |
| 72  | 6  | 0 | 5.223994  | -0.281023 | -0.777096 |
| 73  | 6  | 0 | 5.426034  | 0.627800  | 0.265468  |
| 74  | 1  | 0 | 4.862661  | 1.131470  | 2.268699  |
| 75  | 1  | 0 | 5.763719  | -0.130957 | -1.708964 |
| 76  | 6  | 0 | 6.398370  | 1.762034  | 0.133902  |
| 77  | 6  | 0 | 8.248658  | 3.891473  | -0.074389 |
| 78  | 6  | 0 | -6.326746 | 1.856846  | 0.736507  |
| 79  | 6  | 0 | -7.977626 | 4.014754  | 1.535646  |
| 80  | 6  | 0 | -4.123288 | -0.410167 | -1.415336 |
| 81  | 6  | 0 | -3.609031 | -0.393387 | -2.849365 |
| 82  | 6  | 0 | -4.713594 | -0.649879 | -3.912667 |
| 83  | 6  | 0 | -2.934182 | 0.943100  | -3.316404 |
| 84  | 1  | 0 | -2.860491 | -1.181516 | -2.950851 |
| 85  | 6  | 0 | -4.136172 | -0.052427 | -5.202183 |
| 86  | 1  | 0 | -5.632868 | -0.116013 | -3.635183 |
| 87  | 1  | 0 | -4.968854 | -1.711193 | -4.001493 |
| 88  | 6  | 0 | -3.511617 | 1.267739  | -4.718358 |
| 89  | 1  | 0 | -1.851430 | 0.802297  | -3.354982 |
| 90  | 1  | 0 | -3.115316 | 1.761944  | -2.613343 |
| 91  | 1  | 0 | -3.357712 | -0.715689 | -5.603154 |
| 92  | 1  | 0 | -4.885750 | 0.087389  | -5.989642 |
| 93  | 1  | 0 | -2.755603 | 1.661756  | -5.406816 |
| 94  | 1  | 0 | -4.296915 | 2.031079  | -4.637208 |
| 95  | 6  | 0 | -4.393884 | -1.438388 | 0.793608  |
| 96  | 6  | 0 | -4.174011 | -2.552887 | 1.803429  |
| 97  | 6  | 0 | -3.422819 | -2.138902 | 3.089915  |
| 98  | 6  | 0 | -5.456967 | -3.209116 | 2.368998  |
| 99  | 1  | 0 | -3.592039 | -3.349523 | 1.331136  |
| 100 | 6  | 0 | -3.629954 | -3.333700 | 4.044304  |
| 101 | 1  | 0 | -3.883760 | -1.234422 | 3.508902  |

|     |   |   |           |           |           |     |   |   |           |          |           |
|-----|---|---|-----------|-----------|-----------|-----|---|---|-----------|----------|-----------|
| 102 | 1 | 0 | -2.370295 | -1.911364 | 2.898433  | 171 | 1 | 0 | -9.262583 | 1.146498 | -0.923776 |
| 103 | 6 | 0 | -4.975395 | -3.995044 | 3.612861  | 172 | 6 | 0 | -8.847643 | 5.184006 | 1.935337  |
| 104 | 1 | 0 | -5.960691 | -3.843313 | 1.630912  | 173 | 1 | 0 | -8.758346 | 6.012295 | 1.219269  |
| 105 | 1 | 0 | -6.173587 | -2.432772 | 2.663964  | 174 | 1 | 0 | -9.905965 | 4.902534 | 1.971323  |
| 106 | 1 | 0 | -2.805672 | -4.048701 | 3.935410  | 175 | 1 | 0 | -8.567816 | 5.574223 | 2.919637  |
| 107 | 1 | 0 | -3.635969 | -3.022870 | 5.094647  |     |   |   |           |          |           |
| 108 | 1 | 0 | -4.819161 | -5.050982 | 3.364619  |     |   |   |           |          |           |
| 109 | 1 | 0 | -5.722254 | -3.971390 | 4.413817  |     |   |   |           |          |           |
| 110 | 6 | 0 | 4.388143  | -1.397271 | -0.640828 |     |   |   |           |          |           |
| 111 | 6 | 0 | 4.280776  | -2.371624 | -1.802918 |     |   |   |           |          |           |
| 112 | 6 | 0 | 3.709230  | -1.787383 | -3.114238 |     |   |   |           |          |           |
| 113 | 6 | 0 | 5.617800  | -2.997604 | -2.273065 |     |   |   |           |          |           |
| 114 | 1 | 0 | 3.625868  | -3.197596 | -1.510870 |     |   |   |           |          |           |
| 115 | 6 | 0 | 4.001542  | -2.883702 | -4.156169 |     |   |   |           |          |           |
| 116 | 1 | 0 | 4.243984  | -0.862943 | -3.372096 |     |   |   |           |          |           |
| 117 | 1 | 0 | 2.644886  | -1.546201 | -3.028776 |     |   |   |           |          |           |
| 118 | 6 | 0 | 5.325720  | -3.560099 | -3.689551 |     |   |   |           |          |           |
| 119 | 1 | 0 | 5.980236  | -3.761518 | -1.576318 |     |   |   |           |          |           |
| 120 | 1 | 0 | 6.392398  | -2.223312 | -2.324211 |     |   |   |           |          |           |
| 121 | 1 | 0 | 3.185093  | -3.616109 | -4.155725 |     |   |   |           |          |           |
| 122 | 1 | 0 | 4.068176  | -2.486647 | -5.174998 |     |   |   |           |          |           |
| 123 | 1 | 0 | 5.216143  | -4.649958 | -3.668106 |     |   |   |           |          |           |
| 124 | 1 | 0 | 6.152889  | -3.344753 | -4.374768 |     |   |   |           |          |           |
| 125 | 6 | 0 | 3.865944  | -0.667814 | 1.640959  |     |   |   |           |          |           |
| 126 | 6 | 0 | 3.156986  | -0.810354 | 2.981752  |     |   |   |           |          |           |
| 127 | 6 | 0 | 4.105252  | -1.179791 | 4.157510  |     |   |   |           |          |           |
| 128 | 6 | 0 | 2.399813  | 0.471836  | 3.481173  |     |   |   |           |          |           |
| 129 | 1 | 0 | 2.414960  | -1.605712 | 2.891439  |     |   |   |           |          |           |
| 130 | 6 | 0 | 3.370385  | -0.679224 | 5.408224  |     |   |   |           |          |           |
| 131 | 1 | 0 | 5.059971  | -0.646986 | 4.051618  |     |   |   |           |          |           |
| 132 | 1 | 0 | 4.333752  | -2.251010 | 4.185750  |     |   |   |           |          |           |
| 133 | 6 | 0 | 2.816155  | 0.683236  | 4.957855  |     |   |   |           |          |           |
| 134 | 1 | 0 | 1.323607  | 0.301147  | 3.389631  |     |   |   |           |          |           |
| 135 | 1 | 0 | 2.627463  | 1.348556  | 2.868235  |     |   |   |           |          |           |
| 136 | 1 | 0 | 2.545553  | -1.361608 | 5.655589  |     |   |   |           |          |           |
| 137 | 1 | 0 | 4.016460  | -0.613026 | 6.291462  |     |   |   |           |          |           |
| 138 | 1 | 0 | 1.990293  | 1.038801  | 5.584332  |     |   |   |           |          |           |
| 139 | 1 | 0 | 3.613245  | 1.436183  | 5.022986  |     |   |   |           |          |           |
| 140 | 6 | 0 | -7.628061 | 1.993827  | 0.203047  |     |   |   |           |          |           |
| 141 | 6 | 0 | -8.426971 | 3.065276  | 0.613842  |     |   |   |           |          |           |
| 142 | 1 | 0 | -9.432017 | 3.156147  | 0.205230  |     |   |   |           |          |           |
| 143 | 6 | 0 | -6.693161 | 3.857343  | 2.059467  |     |   |   |           |          |           |
| 144 | 1 | 0 | -6.323225 | 4.580033  | 2.784841  |     |   |   |           |          |           |
| 145 | 6 | 0 | -5.862908 | 2.795707  | 1.682241  |     |   |   |           |          |           |
| 146 | 6 | 0 | 6.949909  | 4.013496  | -0.573155 |     |   |   |           |          |           |
| 147 | 1 | 0 | 6.646631  | 4.947236  | -1.043865 |     |   |   |           |          |           |
| 148 | 6 | 0 | 6.020163  | 2.971323  | -0.484247 |     |   |   |           |          |           |
| 149 | 6 | 0 | 8.605187  | 2.684588  | 0.533089  |     |   |   |           |          |           |
| 150 | 1 | 0 | 9.611336  | 2.566943  | 0.932069  |     |   |   |           |          |           |
| 151 | 6 | 0 | 7.706127  | 1.619406  | 0.646449  |     |   |   |           |          |           |
| 152 | 6 | 0 | 8.151354  | 0.335930  | 1.313223  |     |   |   |           |          |           |
| 153 | 1 | 0 | 7.592231  | 0.141084  | 2.236247  |     |   |   |           |          |           |
| 154 | 1 | 0 | 7.990318  | -0.532430 | 0.664118  |     |   |   |           |          |           |
| 155 | 1 | 0 | 9.215138  | 0.378307  | 1.567766  |     |   |   |           |          |           |
| 156 | 6 | 0 | 4.632736  | 3.158910  | -1.055101 |     |   |   |           |          |           |
| 157 | 1 | 0 | 4.494016  | 2.554476  | -1.961090 |     |   |   |           |          |           |
| 158 | 1 | 0 | 3.850521  | 2.854909  | -0.352855 |     |   |   |           |          |           |
| 159 | 1 | 0 | 4.460785  | 4.205512  | -1.326693 |     |   |   |           |          |           |
| 160 | 6 | 0 | 9.245968  | 5.019055  | -0.210280 |     |   |   |           |          |           |
| 161 | 1 | 0 | 9.830284  | 4.927250  | -1.136067 |     |   |   |           |          |           |
| 162 | 1 | 0 | 8.747418  | 5.994091  | -0.237923 |     |   |   |           |          |           |
| 163 | 1 | 0 | 9.958815  | 5.026812  | 0.621613  |     |   |   |           |          |           |
| 164 | 6 | 0 | -4.488127 | 2.680387  | 2.304713  |     |   |   |           |          |           |
| 165 | 1 | 0 | -4.454118 | 1.901648  | 3.076859  |     |   |   |           |          |           |
| 166 | 1 | 0 | -3.728640 | 2.413850  | 1.563236  |     |   |   |           |          |           |
| 167 | 1 | 0 | -4.195961 | 3.623601  | 2.778064  |     |   |   |           |          |           |
| 168 | 6 | 0 | -8.188153 | 0.991167  | -0.783306 |     |   |   |           |          |           |
| 169 | 1 | 0 | -7.710988 | 1.071226  | -1.767428 |     |   |   |           |          |           |
| 170 | 1 | 0 | -8.032595 | -0.038557 | -0.443689 |     |   |   |           |          |           |

**DFT calculation of real system using SPINOL-derived CPA (S)-1bg**

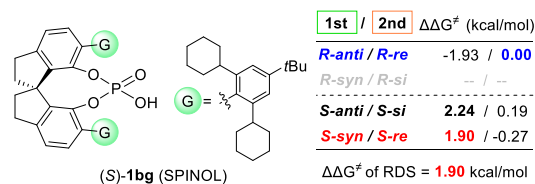

**TS-1st-(R)-reaction pathway: *R-anti*/(S)-1bg (SPINOL)**

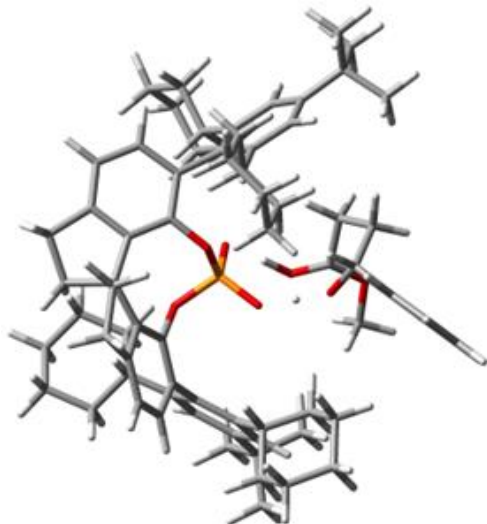

B3LYP/6-31G(d); E(B3LYP) = -3667.78658495 hartree  
 Zero-point Energy Correction = 1.517614 hartree  
 Thermal Correction to Energy = 1.592386 hartree  
 Thermal correction to Enthalpy = 1.593330 hartree  
 Thermal correction to Gibbs Free Energy = 1.404519 hartree  
 Sum of electronic and Zero-point Energies = -3666.268971 hartree  
 Sum of electronic and thermal Energies = -3666.194199 hartree  
 Sum of electronic and thermal Enthalpies = -3666.193255 hartree  
 Sum of electronic and thermal Free Energies = -3666.382065 hartree  
 The number of Imaginary frequencies = 1

| Center Number | Atomic Number | Atomic Type | Coordinates (Angstroms) |           |           |
|---------------|---------------|-------------|-------------------------|-----------|-----------|
|               |               |             | X                       | Y         | Z         |
| 1             | 6             | 0           | -0.154667               | 2.297739  | -2.657605 |
| 2             | 8             | 0           | 0.158574                | 2.734257  | -1.035309 |
| 3             | 6             | 0           | -1.018022               | 3.401115  | -0.485892 |
| 4             | 6             | 0           | -1.996679               | 3.533982  | -1.672096 |
| 5             | 6             | 0           | -1.671363               | 2.350376  | -2.581752 |
| 6             | 1             | 0           | -1.439778               | 2.719582  | 0.260520  |
| 7             | 1             | 0           | -1.829428               | 4.477784  | -2.198990 |
| 8             | 1             | 0           | -3.030288               | 3.519789  | -1.318548 |
| 9             | 1             | 0           | -2.077178               | 2.459993  | -3.591405 |
| 10            | 1             | 0           | -2.034450               | 1.409418  | -2.158849 |
| 11            | 8             | 0           | 0.487966                | 1.160978  | -2.872600 |
| 12            | 8             | 0           | 0.335764                | 3.335602  | -3.366618 |
| 13            | 6             | 0           | 1.757669                | 3.343743  | -3.592355 |
| 14            | 1             | 0           | 1.966394                | 4.302290  | -4.069087 |
| 15            | 1             | 0           | 2.046425                | 2.521300  | -4.249747 |
| 16            | 1             | 0           | 2.295348                | 3.265361  | -2.643875 |
| 17            | 1             | 0           | 0.392901                | 1.832992  | -0.370874 |
| 18            | 1             | 0           | 0.095713                | 0.386893  | -2.341836 |
| 19            | 6             | 0           | -1.130814               | -3.157094 | 1.824456  |
| 20            | 6             | 0           | -1.743070               | -2.087983 | 1.170242  |
| 21            | 6             | 0           | -3.581156               | -3.513979 | 0.560301  |
| 22            | 6             | 0           | -2.935361               | -4.617884 | 1.114584  |
| 23            | 6             | 0           | -1.707013               | -4.434512 | 1.737571  |

|    |    |   |           |           |           |
|----|----|---|-----------|-----------|-----------|
| 24 | 1  | 0 | -4.559194 | -3.636219 | 0.105484  |
| 25 | 1  | 0 | -3.392815 | -5.602828 | 1.063188  |
| 26 | 6  | 0 | -0.814702 | -5.470378 | 2.384157  |
| 27 | 1  | 0 | -1.214395 | -5.793178 | 3.355828  |
| 28 | 1  | 0 | -0.709875 | -6.373715 | 1.772294  |
| 29 | 6  | 0 | 0.086434  | -3.208189 | 2.744609  |
| 30 | 6  | 0 | 0.513355  | -4.703827 | 2.548572  |
| 31 | 1  | 0 | 1.101837  | -4.782365 | 1.626963  |
| 32 | 1  | 0 | 1.132599  | -5.074613 | 3.371024  |
| 33 | 6  | 0 | -0.311232 | -2.974778 | 4.240975  |
| 34 | 1  | 0 | -0.896216 | -2.050064 | 4.309079  |
| 35 | 1  | 0 | -0.923271 | -3.787107 | 4.645332  |
| 36 | 6  | 0 | 1.035824  | -2.797298 | 4.975871  |
| 37 | 1  | 0 | 1.429186  | -3.760393 | 5.330056  |
| 38 | 1  | 0 | 0.953195  | -2.150406 | 5.857020  |
| 39 | 6  | 0 | 1.918745  | -2.198094 | 3.902239  |
| 40 | 6  | 0 | 1.300004  | -2.288551 | 2.645818  |
| 41 | 6  | 0 | 3.176787  | -1.620807 | 4.028546  |
| 42 | 1  | 0 | 3.672335  | -1.569721 | 4.994998  |
| 43 | 6  | 0 | 1.889968  | -1.661181 | 1.550493  |
| 44 | 6  | 0 | 3.807778  | -1.119266 | 2.889879  |
| 45 | 1  | 0 | 4.810595  | -0.712281 | 2.969122  |
| 46 | 8  | 0 | -1.112025 | -0.843131 | 1.177850  |
| 47 | 8  | 0 | 1.203089  | -1.635160 | 0.335240  |
| 48 | 15 | 0 | 0.048779  | -0.511803 | 0.070918  |
| 49 | 8  | 0 | 0.545588  | 0.877606  | 0.472477  |
| 50 | 8  | 0 | -0.435077 | -0.710617 | -1.341372 |
| 51 | 6  | 0 | -2.998324 | -2.235380 | 0.545962  |
| 52 | 6  | 0 | 3.177656  | -1.094525 | 1.634276  |
| 53 | 6  | 0 | -0.645709 | 4.708539  | 0.173920  |
| 54 | 6  | 0 | -1.068063 | 4.979714  | 1.478834  |
| 55 | 6  | 0 | 0.093153  | 5.678019  | -0.518329 |
| 56 | 6  | 0 | -0.768351 | 6.202832  | 2.083399  |
| 57 | 1  | 0 | -1.632818 | 4.228913  | 2.026892  |
| 58 | 6  | 0 | 0.400441  | 6.895241  | 0.086405  |
| 59 | 1  | 0 | 0.429775  | 5.468793  | -1.529882 |
| 60 | 6  | 0 | -0.032424 | 7.162534  | 1.388898  |
| 61 | 1  | 0 | -1.103541 | 6.399998  | 3.098108  |
| 62 | 1  | 0 | 0.977451  | 7.638197  | -0.458098 |
| 63 | 1  | 0 | 0.206541  | 8.113024  | 1.858377  |
| 64 | 6  | 0 | 3.901447  | -0.520656 | 0.450566  |
| 65 | 6  | 0 | 4.284604  | 0.847036  | 0.429727  |
| 66 | 6  | 0 | 4.289919  | -1.360986 | -0.619829 |
| 67 | 6  | 0 | -3.770897 | -1.111544 | -0.084567 |
| 68 | 6  | 0 | -4.350985 | -0.104214 | 0.727937  |
| 69 | 6  | 0 | -4.049035 | -1.125067 | -1.473105 |
| 70 | 6  | 0 | 5.437572  | 0.511521  | -1.717143 |
| 71 | 6  | 0 | -5.541337 | 0.813412  | -1.218268 |
| 72 | 6  | 0 | -5.208369 | 0.832903  | 0.141964  |
| 73 | 1  | 0 | -5.661123 | 1.582714  | 0.785296  |
| 74 | 6  | 0 | -4.930010 | -0.168290 | -2.001072 |
| 75 | 1  | 0 | -5.149219 | -0.216240 | -3.061395 |
| 76 | 6  | 0 | 5.040820  | -0.824933 | -1.675489 |
| 77 | 1  | 0 | 5.331630  | -1.492766 | -2.477832 |
| 78 | 6  | 0 | 5.039759  | 1.321424  | -0.647098 |
| 79 | 1  | 0 | 5.334080  | 2.366967  | -0.640287 |
| 80 | 6  | 0 | 6.292090  | 1.097502  | -2.856909 |
| 81 | 6  | 0 | 7.623539  | 1.632774  | -2.277832 |
| 82 | 1  | 0 | 8.242903  | 2.062592  | -3.075209 |
| 83 | 1  | 0 | 7.456952  | 2.412013  | -1.526841 |
| 84 | 1  | 0 | 8.193793  | 0.827070  | -1.801507 |
| 85 | 6  | 0 | 5.529526  | 2.259367  | -3.535931 |
| 86 | 1  | 0 | 5.294304  | 3.059712  | -2.826333 |
| 87 | 1  | 0 | 6.132759  | 2.694138  | -4.342765 |
| 88 | 1  | 0 | 4.587409  | 1.903941  | -3.969317 |
| 89 | 6  | 0 | 6.627544  | 0.052490  | -3.937967 |
| 90 | 1  | 0 | 7.204283  | -0.784918 | -3.529567 |
| 91 | 1  | 0 | 5.724095  | -0.352331 | -4.408079 |
| 92 | 1  | 0 | 7.232145  | 0.516089  | -4.726161 |

|     |   |   |           |           |           |     |   |   |           |           |           |
|-----|---|---|-----------|-----------|-----------|-----|---|---|-----------|-----------|-----------|
| 93  | 6 | 0 | -6.578330 | 1.807523  | -1.776758 | 162 | 1 | 0 | -5.279104 | -2.601114 | -3.511265 |
| 94  | 6 | 0 | -7.934421 | 1.567047  | -1.069390 | 163 | 1 | 0 | -5.015113 | -3.643823 | -2.122402 |
| 95  | 1 | 0 | -7.860498 | 1.721058  | 0.012160  | 164 | 6 | 0 | -2.074546 | -2.558665 | -4.539316 |
| 96  | 1 | 0 | -8.695860 | 2.256380  | -1.455343 | 165 | 1 | 0 | -3.411771 | -0.895094 | -4.213262 |
| 97  | 1 | 0 | -8.285553 | 0.542666  | -1.237279 | 166 | 1 | 0 | -1.934967 | -0.829977 | -3.243167 |
| 98  | 6 | 0 | -6.124947 | 3.262238  | -1.514833 | 167 | 6 | 0 | -3.114660 | -3.565651 | -5.049487 |
| 99  | 1 | 0 | -5.951029 | 3.453135  | -0.450710 | 168 | 1 | 0 | -4.656940 | -4.885381 | -4.262656 |
| 100 | 1 | 0 | -5.197184 | 3.486498  | -2.053742 | 169 | 1 | 0 | -3.183905 | -4.832017 | -3.298307 |
| 101 | 1 | 0 | -6.890098 | 3.969218  | -1.858576 | 170 | 1 | 0 | -1.573189 | -2.068276 | -5.384086 |
| 102 | 6 | 0 | -6.795569 | 1.643092  | -3.293093 | 171 | 1 | 0 | -1.292101 | -3.091979 | -3.980518 |
| 103 | 1 | 0 | -5.870672 | 1.805392  | -3.858434 | 172 | 1 | 0 | -2.632682 | -4.338417 | -5.662556 |
| 104 | 1 | 0 | -7.178646 | 0.647922  | -3.544804 | 173 | 1 | 0 | -3.829673 | -3.046730 | -5.706040 |
| 105 | 1 | 0 | -7.530659 | 2.377122  | -3.642608 |     |   |   |           |           |           |
| 106 | 6 | 0 | 3.989887  | -2.856914 | -0.654052 |     |   |   |           |           |           |
| 107 | 6 | 0 | 3.170367  | -3.279982 | -1.895038 |     |   |   |           |           |           |
| 108 | 6 | 0 | 5.283273  | -3.701879 | -0.547618 |     |   |   |           |           |           |
| 109 | 1 | 0 | 3.386073  | -3.110801 | 0.222194  |     |   |   |           |           |           |
| 110 | 6 | 0 | 2.869491  | -4.787096 | -1.883701 |     |   |   |           |           |           |
| 111 | 1 | 0 | 3.730259  | -3.035734 | -2.809207 |     |   |   |           |           |           |
| 112 | 1 | 0 | 2.238873  | -2.705010 | -1.929708 |     |   |   |           |           |           |
| 113 | 6 | 0 | 4.978457  | -5.207929 | -0.540664 |     |   |   |           |           |           |
| 114 | 1 | 0 | 5.944664  | -3.470471 | -1.394710 |     |   |   |           |           |           |
| 115 | 1 | 0 | 5.832898  | -3.420875 | 0.359983  |     |   |   |           |           |           |
| 116 | 6 | 0 | 4.152884  | -5.623471 | -1.766875 |     |   |   |           |           |           |
| 117 | 1 | 0 | 2.314292  | -5.064867 | -2.789173 |     |   |   |           |           |           |
| 118 | 1 | 0 | 2.208967  | -5.015952 | -1.033598 |     |   |   |           |           |           |
| 119 | 1 | 0 | 5.914581  | -5.780288 | -0.498584 |     |   |   |           |           |           |
| 120 | 1 | 0 | 4.419427  | -5.459084 | 0.373225  |     |   |   |           |           |           |
| 121 | 1 | 0 | 3.909896  | -6.693143 | -1.718292 |     |   |   |           |           |           |
| 122 | 1 | 0 | 4.759069  | -5.481921 | -2.674391 |     |   |   |           |           |           |
| 123 | 6 | 0 | 3.937411  | 1.825126  | 1.550251  |     |   |   |           |           |           |
| 124 | 6 | 0 | 5.183830  | 2.199862  | 2.390907  |     |   |   |           |           |           |
| 125 | 6 | 0 | 3.251711  | 3.118780  | 1.052578  |     |   |   |           |           |           |
| 126 | 1 | 0 | 3.222478  | 1.335874  | 2.219725  |     |   |   |           |           |           |
| 127 | 6 | 0 | 4.826681  | 3.127863  | 3.561946  |     |   |   |           |           |           |
| 128 | 1 | 0 | 5.917848  | 2.698022  | 1.740512  |     |   |   |           |           |           |
| 129 | 1 | 0 | 5.677635  | 1.294990  | 2.766279  |     |   |   |           |           |           |
| 130 | 6 | 0 | 2.878513  | 4.041402  | 2.223613  |     |   |   |           |           |           |
| 131 | 1 | 0 | 3.925734  | 3.664276  | 0.375808  |     |   |   |           |           |           |
| 132 | 1 | 0 | 2.359770  | 2.864119  | 0.474118  |     |   |   |           |           |           |
| 133 | 6 | 0 | 4.103660  | 4.393605  | 3.079501  |     |   |   |           |           |           |
| 134 | 1 | 0 | 5.734038  | 3.394189  | 4.120351  |     |   |   |           |           |           |
| 135 | 1 | 0 | 4.175689  | 2.585066  | 4.263314  |     |   |   |           |           |           |
| 136 | 1 | 0 | 2.402399  | 4.953426  | 1.843281  |     |   |   |           |           |           |
| 137 | 1 | 0 | 2.128610  | 3.538360  | 2.851193  |     |   |   |           |           |           |
| 138 | 1 | 0 | 3.808190  | 5.013822  | 3.936043  |     |   |   |           |           |           |
| 139 | 1 | 0 | 4.800494  | 4.999793  | 2.480639  |     |   |   |           |           |           |
| 140 | 6 | 0 | -4.124263 | -0.030190 | 2.235169  |     |   |   |           |           |           |
| 141 | 6 | 0 | -3.417984 | 1.277910  | 2.662311  |     |   |   |           |           |           |
| 142 | 6 | 0 | -5.434399 | -0.222797 | 3.036233  |     |   |   |           |           |           |
| 143 | 1 | 0 | -3.462438 | -0.851914 | 2.525012  |     |   |   |           |           |           |
| 144 | 6 | 0 | -3.178003 | 1.326480  | 4.179246  |     |   |   |           |           |           |
| 145 | 1 | 0 | -4.033064 | 2.140511  | 2.366001  |     |   |   |           |           |           |
| 146 | 1 | 0 | -2.463925 | 1.360582  | 2.128877  |     |   |   |           |           |           |
| 147 | 6 | 0 | -5.185479 | -0.175038 | 4.551751  |     |   |   |           |           |           |
| 148 | 1 | 0 | -6.153873 | 0.562498  | 2.764220  |     |   |   |           |           |           |
| 149 | 1 | 0 | -5.897771 | -1.177354 | 2.756228  |     |   |   |           |           |           |
| 150 | 6 | 0 | -4.479704 | 1.123986  | 4.968404  |     |   |   |           |           |           |
| 151 | 1 | 0 | -2.709073 | 2.280235  | 4.455348  |     |   |   |           |           |           |
| 152 | 1 | 0 | -2.460536 | 0.538969  | 4.453658  |     |   |   |           |           |           |
| 153 | 1 | 0 | -6.135406 | -0.283225 | 5.091327  |     |   |   |           |           |           |
| 154 | 1 | 0 | -4.562384 | -1.033765 | 4.842759  |     |   |   |           |           |           |
| 155 | 1 | 0 | -4.275268 | 1.117880  | 6.046925  |     |   |   |           |           |           |
| 156 | 1 | 0 | -5.151578 | 1.975612  | 4.782609  |     |   |   |           |           |           |
| 157 | 6 | 0 | -3.446709 | -2.153092 | -2.429757 |     |   |   |           |           |           |
| 158 | 6 | 0 | -4.503803 | -3.153604 | -2.960111 |     |   |   |           |           |           |
| 159 | 6 | 0 | -2.708602 | -1.501180 | -3.623277 |     |   |   |           |           |           |
| 160 | 1 | 0 | -2.694479 | -2.727340 | -1.879661 |     |   |   |           |           |           |
| 161 | 6 | 0 | -3.877833 | -4.210727 | -3.883722 |     |   |   |           |           |           |

TS-2nd-(R)-reaction pathway: R-re(S)-Ibg (SPINOL)

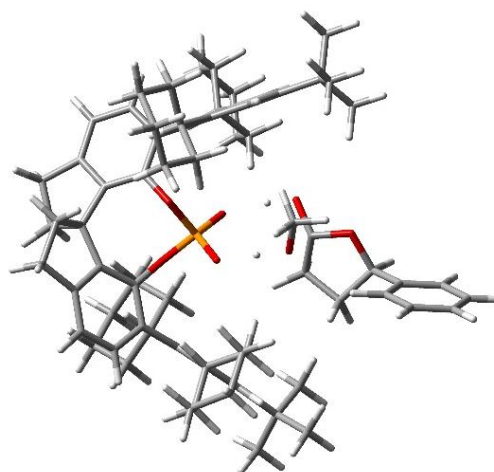

B3LYP/6-31G(d), E(B3LYP) = -3667.78446830 hartree

Zero-point Energy Correction = 1.518547 hartree

Thermal Correction to Energy = 1.593332 hartree

Thermal correction to Enthalpy = 1.594276 hartree

Thermal correction to Gibbs Free Energy = 1.405483 hartree

Sum of electronic and Zero-point Energies = -3666.265922 hartree

Sum of electronic and thermal Energies = -3666.191136 hartree

Sum of electronic and thermal Enthalpies = -3666.190192 hartree

Sum of electronic and thermal Free Energies = -3666.378985 hartree

The number of Imaginary frequencies = 1

| Center Number | Atomic Number | Atomic Type | Coordinates (Angstroms) |           |           |
|---------------|---------------|-------------|-------------------------|-----------|-----------|
|               |               |             | X                       | Y         | Z         |
| 1             | 6             | 0           | 0.209459                | 2.930741  | -1.003756 |
| 2             | 8             | 0           | 0.222737                | 4.280236  | -1.097039 |
| 3             | 8             | 0           | 0.414620                | 2.650329  | 0.673469  |
| 4             | 6             | 0           | 1.559741                | 4.770654  | -1.455730 |
| 5             | 6             | 0           | 2.477158                | 3.536698  | -1.337789 |
| 6             | 6             | 0           | 1.512469                | 2.367881  | -1.557939 |
| 7             | 1             | 0           | 1.479369                | 5.082459  | -2.503440 |
| 8             | 1             | 0           | 2.923243                | 3.481765  | -0.341597 |
| 9             | 1             | 0           | 3.287813                | 3.574484  | -2.070180 |
| 10            | 1             | 0           | 1.816033                | 1.436161  | -1.081155 |
| 11            | 1             | 0           | 1.343453                | 2.168395  | -2.622129 |
| 12            | 8             | 0           | -0.967988               | 2.425792  | -1.319856 |
| 13            | 6             | 0           | -0.662610               | 3.187781  | 1.471662  |
| 14            | 1             | 0           | -0.643557               | 4.273625  | 1.373188  |
| 15            | 1             | 0           | -0.471898               | 2.895738  | 2.506425  |
| 16            | 1             | 0           | -1.624564               | 2.792046  | 1.136567  |
| 17            | 1             | 0           | 0.454883                | 1.560492  | 0.838336  |
| 18            | 1             | 0           | -0.925125               | 1.408992  | -1.316986 |
| 19            | 6             | 0           | -2.112253               | -3.502235 | 0.632626  |
| 20            | 6             | 0           | -2.415755               | -2.147648 | 0.511675  |
| 21            | 6             | 0           | -4.488467               | -2.703272 | -0.572990 |



|    |    |   |           |           |           |     |   |   |           |           |           |
|----|----|---|-----------|-----------|-----------|-----|---|---|-----------|-----------|-----------|
| 22 | 6  | 0 | -4.160769 | -4.058936 | -0.544063 | 91  | 1 | 0 | -2.622274 | 0.522932  | 5.365630  |
| 23 | 6  | 0 | -2.963061 | -4.450308 | 0.042756  | 92  | 1 | 0 | -2.949057 | -1.044890 | 4.637209  |
| 24 | 1  | 0 | -5.430099 | -2.387856 | -1.011977 | 93  | 1 | 0 | -6.744945 | -0.633285 | 4.748761  |
| 25 | 1  | 0 | -4.833186 | -4.793355 | -0.980700 | 94  | 1 | 0 | -5.479817 | -1.756652 | 4.262465  |
| 26 | 6  | 0 | -2.368304 | -5.837726 | 0.146290  | 95  | 1 | 0 | -4.740832 | -0.494783 | 6.266886  |
| 27 | 1  | 0 | -2.880870 | -6.439861 | 0.909853  | 96  | 1 | 0 | -5.049513 | 1.036560  | 5.453235  |
| 28 | 1  | 0 | -2.441367 | -6.395755 | -0.794287 | 97  | 6 | 0 | -3.859935 | -0.445544 | -2.806322 |
| 29 | 6  | 0 | -0.992332 | -4.215656 | 1.384559  | 98  | 6 | 0 | -5.194697 | -0.679246 | -3.556618 |
| 30 | 6  | 0 | -0.908848 | -5.540330 | 0.551081  | 99  | 6 | 0 | -2.836160 | 0.216116  | -3.758913 |
| 31 | 1  | 0 | -0.306244 | -5.353575 | -0.345593 | 100 | 1 | 0 | -3.450491 | -1.428527 | -2.552959 |
| 32 | 1  | 0 | -0.435247 | -6.355817 | 1.106332  | 101 | 6 | 0 | -4.998838 | -1.505949 | -4.836993 |
| 33 | 6  | 0 | -1.412043 | -4.558570 | 2.853418  | 102 | 1 | 0 | -5.635244 | 0.294713  | -3.815576 |
| 34 | 1  | 0 | -1.778174 | -3.645765 | 3.337542  | 103 | 1 | 0 | -5.918442 | -1.173717 | -2.896202 |
| 35 | 1  | 0 | -2.212707 | -5.303491 | 2.897069  | 104 | 6 | 0 | -2.635866 | -0.618479 | -5.034285 |
| 36 | 6  | 0 | -0.104173 | -5.023472 | 3.530459  | 105 | 1 | 0 | -3.179330 | 1.220970  | -4.042930 |
| 37 | 1  | 0 | 0.043922  | -6.106449 | 3.416001  | 106 | 1 | 0 | -1.884139 | 0.334074  | -3.235637 |
| 38 | 1  | 0 | -0.089801 | -4.818116 | 4.607172  | 107 | 6 | 0 | -3.960532 | -0.866094 | -5.769600 |
| 39 | 6  | 0 | 0.949755  | -4.236921 | 2.781062  | 108 | 1 | 0 | -5.958612 | -1.624884 | -5.357274 |
| 40 | 6  | 0 | 0.401593  | -3.641924 | 1.633148  | 109 | 1 | 0 | -4.664210 | -2.517908 | -4.564336 |
| 41 | 6  | 0 | 2.291606  | -4.061441 | 3.097428  | 110 | 1 | 0 | -1.919998 | -0.117122 | -5.699083 |
| 42 | 1  | 0 | 2.725340  | -4.541694 | 3.971208  | 111 | 1 | 0 | -2.184513 | -1.584660 | -4.764190 |
| 43 | 6  | 0 | 1.179603  | -2.750367 | 0.895399  | 112 | 1 | 0 | -3.798171 | -1.500362 | -6.651048 |
| 44 | 6  | 0 | 3.083356  | -3.264698 | 2.270005  | 113 | 1 | 0 | -4.352446 | 0.092453  | -6.142276 |
| 45 | 1  | 0 | 4.141992  | -3.156901 | 2.483917  | 114 | 6 | 0 | 3.161212  | -3.284844 | -1.671976 |
| 46 | 8  | 0 | -1.522254 | -1.211967 | 1.030458  | 115 | 6 | 0 | 2.331024  | -2.956126 | -2.934754 |
| 47 | 8  | 0 | 0.601101  | -2.053606 | -0.165425 | 116 | 6 | 0 | 4.267490  | -4.315056 | -2.004927 |
| 48 | 15 | 0 | -0.255662 | -0.692795 | 0.129696  | 117 | 1 | 0 | 2.483689  | -3.779830 | -0.969655 |
| 49 | 8  | 0 | 0.503820  | 0.235565  | 1.074090  | 118 | 6 | 0 | 1.752806  | -4.228693 | -3.573149 |
| 50 | 8  | 0 | -0.666030 | -0.157922 | -1.216695 | 119 | 1 | 0 | 2.967665  | -2.445275 | -3.671967 |
| 51 | 6  | 0 | -3.617545 | -1.715137 | -0.085805 | 120 | 1 | 0 | 1.526724  | -2.261260 | -2.671270 |
| 52 | 6  | 0 | 2.548684  | -2.563888 | 1.176663  | 121 | 6 | 0 | 3.685531  | -5.584303 | -2.646330 |
| 53 | 6  | 0 | 1.929646  | 5.965639  | -0.611501 | 122 | 1 | 0 | 4.996719  | -3.863988 | -2.693138 |
| 54 | 6  | 0 | 2.172486  | 7.200570  | -1.220694 | 123 | 1 | 0 | 4.820426  | -4.569190 | -1.091426 |
| 55 | 6  | 0 | 2.051419  | 5.859846  | 0.781637  | 124 | 6 | 0 | 2.850093  | -5.254893 | -3.892245 |
| 56 | 6  | 0 | 2.539206  | 8.311857  | -0.458606 | 125 | 1 | 0 | 1.195220  | -3.971190 | -4.483041 |
| 57 | 1  | 0 | 2.072794  | 7.294886  | -2.299731 | 126 | 1 | 0 | 1.024756  | -4.678909 | -2.881472 |
| 58 | 6  | 0 | 2.408372  | 6.969596  | 1.544820  | 127 | 1 | 0 | 4.494754  | -6.281006 | -2.901972 |
| 59 | 1  | 0 | 1.864051  | 4.905680  | 1.265886  | 128 | 1 | 0 | 3.050243  | -6.101344 | -1.911631 |
| 60 | 6  | 0 | 2.656021  | 8.198427  | 0.926283  | 129 | 1 | 0 | 2.409055  | -6.170324 | -4.308060 |
| 61 | 1  | 0 | 2.726992  | 9.264057  | -0.947193 | 130 | 1 | 0 | 3.511401  | -4.845499 | -4.671034 |
| 62 | 1  | 0 | 2.496765  | 6.876214  | 2.623924  | 131 | 6 | 0 | 3.839541  | -0.107331 | 2.353820  |
| 63 | 1  | 0 | 2.937335  | 9.061908  | 1.522982  | 132 | 6 | 0 | 5.078998  | -0.384384 | 3.241160  |
| 64 | 6  | 0 | 3.440694  | -1.687594 | 0.344884  | 133 | 6 | 0 | 3.438649  | 1.379744  | 2.490382  |
| 65 | 6  | 0 | 4.065992  | -0.548142 | 0.908906  | 134 | 1 | 0 | 3.005985  | -0.689498 | 2.759376  |
| 66 | 6  | 0 | 3.731708  | -2.040249 | -0.998310 | 135 | 6 | 0 | 4.825406  | -0.009606 | 4.709498  |
| 67 | 6  | 0 | -3.976092 | -0.264770 | -0.221455 | 136 | 1 | 0 | 5.931769  | 0.194785  | 2.857336  |
| 68 | 6  | 0 | -4.251146 | 0.515359  | 0.924897  | 137 | 1 | 0 | 5.370951  | -1.439058 | 3.167924  |
| 69 | 6  | 0 | -4.082790 | 0.329070  | -1.507556 | 138 | 6 | 0 | 3.166866  | 1.752777  | 3.956415  |
| 70 | 6  | 0 | -4.679187 | 2.483546  | -0.480856 | 139 | 1 | 0 | 4.243999  | 2.023342  | 2.107422  |
| 71 | 6  | 0 | 5.257413  | -0.123594 | -1.199307 | 140 | 1 | 0 | 2.553022  | 1.574522  | 1.880379  |
| 72 | 6  | 0 | 4.622615  | -1.251468 | -1.731324 | 141 | 6 | 0 | 4.378040  | 1.452472  | 4.851604  |
| 73 | 1  | 0 | 4.839588  | -1.546115 | -2.754080 | 142 | 1 | 0 | 5.729595  | -0.190992 | 5.305455  |
| 74 | 6  | 0 | 4.957116  | 0.200805  | 0.124885  | 143 | 1 | 0 | 4.044678  | -0.668173 | 5.117937  |
| 75 | 1  | 0 | 5.432459  | 1.060749  | 0.582153  | 144 | 1 | 0 | 2.896677  | 2.815030  | 4.029706  |
| 76 | 6  | 0 | -4.585853 | 1.869415  | 0.769699  | 145 | 1 | 0 | 2.297281  | 1.183611  | 4.315974  |
| 77 | 1  | 0 | -4.794895 | 2.445360  | 1.664435  | 146 | 1 | 0 | 4.145357  | 1.679547  | 5.900229  |
| 78 | 6  | 0 | -4.436921 | 1.677726  | -1.599251 | 147 | 1 | 0 | 5.210285  | 2.113462  | 4.565957  |
| 79 | 1  | 0 | -4.517358 | 2.116767  | -2.588837 | 148 | 6 | 0 | -5.054907 | 3.965457  | -0.665727 |
| 80 | 6  | 0 | -4.268696 | -0.072027 | 2.333709  | 149 | 6 | 0 | -5.176230 | 4.712580  | 0.676059  |
| 81 | 6  | 0 | -3.275034 | 0.619471  | 3.295156  | 150 | 1 | 0 | -5.966447 | 4.294179  | 1.309728  |
| 82 | 6  | 0 | -5.695377 | -0.061916 | 2.934193  | 151 | 1 | 0 | -4.236919 | 4.688283  | 1.240630  |
| 83 | 1  | 0 | -3.966717 | -1.122626 | 2.272420  | 152 | 1 | 0 | -5.425378 | 5.763868  | 0.491777  |
| 84 | 6  | 0 | -3.313154 | -0.008283 | 4.697702  | 153 | 6 | 0 | -6.418163 | 4.057161  | -1.392685 |
| 85 | 1  | 0 | -3.522273 | 1.688245  | 3.375918  | 154 | 1 | 0 | -6.699206 | 5.105983  | -1.552005 |
| 86 | 1  | 0 | -2.264613 | 0.552374  | 2.877693  | 155 | 1 | 0 | -6.386779 | 3.566446  | -2.371213 |
| 87 | 6  | 0 | -5.728368 | -0.687490 | 4.337451  | 156 | 1 | 0 | -7.209825 | 3.578327  | -0.804667 |
| 88 | 1  | 0 | -6.063123 | 0.972673  | 2.989943  | 157 | 6 | 0 | -3.975998 | 4.678183  | -1.516025 |
| 89 | 1  | 0 | -6.379463 | -0.596897 | 2.263183  | 158 | 1 | 0 | -2.985034 | 4.592650  | -1.058592 |
| 90 | 6  | 0 | -4.731872 | -0.003654 | 5.285002  | 159 | 1 | 0 | -3.906165 | 4.254492  | -2.522779 |

|     |   |   |           |           |           |
|-----|---|---|-----------|-----------|-----------|
| 160 | 1 | 0 | -4.219696 | 5.742970  | -1.620845 |
| 161 | 6 | 0 | 6.258838  | 0.674370  | -2.055343 |
| 162 | 6 | 0 | 5.578246  | 1.142895  | -3.362889 |
| 163 | 1 | 0 | 5.213937  | 0.301144  | -3.960285 |
| 164 | 1 | 0 | 4.721060  | 1.792310  | -3.148794 |
| 165 | 1 | 0 | 6.286277  | 1.708493  | -3.981284 |
| 166 | 6 | 0 | 6.796020  | 1.919898  | -1.324798 |
| 167 | 1 | 0 | 5.989909  | 2.609572  | -1.048377 |
| 168 | 1 | 0 | 7.343780  | 1.655742  | -0.413393 |
| 169 | 1 | 0 | 7.488093  | 2.462818  | -1.978716 |
| 170 | 6 | 0 | 7.461759  | -0.233243 | -2.408542 |
| 171 | 1 | 0 | 8.187372  | 0.312360  | -3.024912 |
| 172 | 1 | 0 | 7.973350  | -0.573621 | -1.501100 |
| 173 | 1 | 0 | 7.147659  | -1.121405 | -2.966624 |

|    |    |   |           |           |           |
|----|----|---|-----------|-----------|-----------|
| 17 | 1  | 0 | 0.509130  | 1.709781  | 0.014388  |
| 18 | 1  | 0 | -1.296165 | 1.207792  | -1.597555 |
| 19 | 6  | 0 | -1.950304 | -3.372786 | 0.758081  |
| 20 | 6  | 0 | -2.325665 | -2.036667 | 0.619392  |
| 21 | 6  | 0 | -4.470463 | -2.730193 | -0.214010 |
| 22 | 6  | 0 | -4.066363 | -4.064091 | -0.210650 |
| 23 | 6  | 0 | -2.797451 | -4.378435 | 0.258416  |
| 24 | 1  | 0 | -5.474228 | -2.477209 | -0.539544 |
| 25 | 1  | 0 | -4.739686 | -4.840771 | -0.565052 |
| 26 | 6  | 0 | -2.123437 | -5.731259 | 0.331885  |
| 27 | 1  | 0 | -2.555193 | -6.355579 | 1.126611  |
| 28 | 1  | 0 | -2.225439 | -6.297606 | -0.601092 |
| 29 | 6  | 0 | -0.764441 | -4.021212 | 1.456375  |
| 30 | 6  | 0 | -0.658809 | -5.355114 | 0.643364  |
| 31 | 1  | 0 | -0.117708 | -5.155850 | -0.289018 |
| 32 | 1  | 0 | -0.114424 | -6.134914 | 1.184836  |
| 33 | 6  | 0 | -1.126107 | -4.354563 | 2.944106  |
| 34 | 1  | 0 | -1.515861 | -3.448711 | 3.422946  |
| 35 | 1  | 0 | -1.894444 | -5.129398 | 3.024077  |
| 36 | 6  | 0 | 0.217376  | -4.751464 | 3.588232  |
| 37 | 1  | 0 | 0.410883  | -5.828271 | 3.483770  |
| 38 | 1  | 0 | 0.255442  | -4.529374 | 4.661020  |
| 39 | 6  | 0 | 1.210688  | -3.931352 | 2.795648  |
| 40 | 6  | 0 | 0.608497  | -3.383918 | 1.650707  |
| 41 | 6  | 0 | 2.551889  | -3.699084 | 3.072492  |
| 42 | 1  | 0 | 3.028560  | -4.146391 | 3.941260  |
| 43 | 6  | 0 | 1.328210  | -2.480843 | 0.866271  |
| 44 | 8  | 0 | -1.416770 | -1.039847 | 0.990093  |
| 45 | 8  | 0 | 0.704127  | -1.876795 | -0.226364 |
| 46 | 15 | 0 | -0.271129 | -0.574787 | -0.080808 |
| 47 | 8  | 0 | 0.454931  | 0.579168  | 0.619235  |
| 48 | 8  | 0 | -0.824398 | -0.312608 | -1.457546 |
| 49 | 6  | 0 | -3.608808 | -1.682160 | 0.154077  |
| 50 | 6  | 0 | 2.692198  | -2.226773 | 1.118537  |
| 51 | 6  | 0 | 2.589139  | 4.183114  | -0.284995 |
| 52 | 6  | 0 | 1.998340  | 4.762603  | 0.843955  |
| 53 | 6  | 0 | 3.760271  | 4.756909  | -0.799374 |
| 54 | 6  | 0 | 2.561464  | 5.893159  | 1.439317  |
| 55 | 1  | 0 | 1.092905  | 4.326801  | 1.251888  |
| 56 | 6  | 0 | 4.326944  | 5.882975  | -0.201009 |
| 57 | 1  | 0 | 4.236363  | 4.327117  | -1.676948 |
| 58 | 6  | 0 | 3.727498  | 6.457335  | 0.920925  |
| 59 | 1  | 0 | 2.084951  | 6.332769  | 2.311792  |
| 60 | 1  | 0 | 5.233991  | 6.313786  | -0.616856 |
| 61 | 1  | 0 | 4.165058  | 7.336704  | 1.385735  |
| 62 | 6  | 0 | -4.111721 | -0.271540 | 0.050749  |
| 63 | 6  | 0 | -4.302912 | 0.509268  | 1.220186  |
| 64 | 6  | 0 | -4.519259 | 0.251194  | -1.202835 |
| 65 | 6  | 0 | 3.282974  | -2.884431 | 2.211460  |
| 66 | 1  | 0 | 4.339918  | -2.720191 | 2.396625  |
| 67 | 6  | 0 | 3.553317  | -1.316617 | 0.293014  |
| 68 | 6  | 0 | 4.161026  | -0.184579 | 0.891889  |
| 69 | 6  | 0 | 3.874161  | -1.645951 | -1.048470 |
| 70 | 6  | 0 | 5.432197  | 0.253145  | -1.167732 |
| 71 | 6  | 0 | -5.330139 | 2.300270  | -0.113653 |
| 72 | 6  | 0 | -5.111989 | 1.521777  | -1.251273 |
| 73 | 1  | 0 | -5.421619 | 1.896272  | -2.220029 |
| 74 | 6  | 0 | -4.902430 | 1.766606  | 1.107070  |
| 75 | 1  | 0 | -5.061146 | 2.338337  | 2.017045  |
| 76 | 6  | 0 | 5.078648  | 0.571888  | 0.145572  |
| 77 | 1  | 0 | 5.542375  | 1.423655  | 0.629765  |
| 78 | 6  | 0 | 4.794011  | -0.853065 | -1.741538 |
| 79 | 1  | 0 | 5.046021  | -1.138852 | -2.758902 |
| 80 | 6  | 0 | 6.519774  | 1.011949  | -1.952693 |
| 81 | 6  | 0 | 7.695444  | 0.045411  | -2.237750 |
| 82 | 1  | 0 | 8.489877  | 0.560878  | -2.792035 |
| 83 | 1  | 0 | 8.123330  | -0.334101 | -1.303026 |
| 84 | 1  | 0 | 7.375878  | -0.816641 | -2.832371 |
| 85 | 6  | 0 | 7.074265  | 2.219616  | -1.172803 |

TS-1st-(S)-reaction pathway: S-anti(S)-1bg (SPINOL)

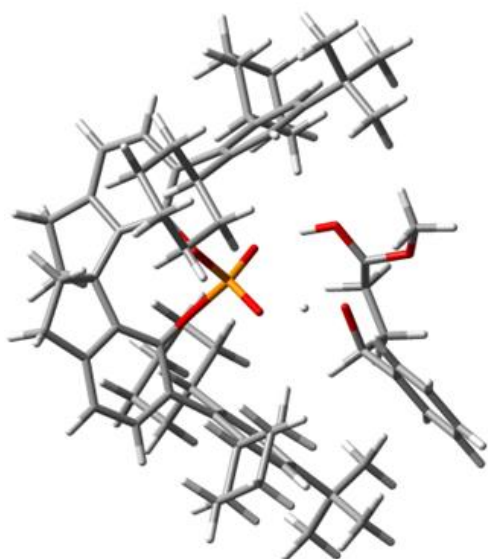

B3LYP/6-31G(d); E(B3LYP) = -3667.78073088 hartree  
 Zero-point Energy Correction = 1.517554 hartree  
 Thermal Correction to Energy = 1.592400 hartree  
 Thermal correction to Enthalpy = 1.593344 hartree  
 Thermal correction to Gibbs Free Energy = 1.405322 hartree  
 Sum of electronic and Zero-point Energies = -3666.263177 hartree  
 Sum of electronic and thermal Energies = -3666.188331 hartree  
 Sum of electronic and thermal Enthalpies = -3666.187387 hartree  
 Sum of electronic and thermal Free Energies = -3666.375409 hartree  
 The number of Imaginary frequencies = 1

| Center Number | Atomic Number | Atomic Type | Coordinates (Angstroms) |          |           |
|---------------|---------------|-------------|-------------------------|----------|-----------|
|               |               |             | X                       | Y        | Z         |
| 1             | 6             | 0           | -0.338228               | 2.863363 | -1.890215 |
| 2             | 8             | 0           | 0.636527                | 2.727603 | -0.512871 |
| 3             | 6             | 0           | 2.015853                | 2.930340 | -0.924242 |
| 4             | 6             | 0           | 2.007833                | 2.944871 | -2.479382 |
| 5             | 6             | 0           | 0.671606                | 2.322363 | -2.885909 |
| 6             | 1             | 0           | 2.567467                | 2.052814 | -0.568903 |
| 7             | 1             | 0           | 2.068129                | 3.972935 | -2.845353 |
| 8             | 1             | 0           | 2.855947                | 2.385689 | -2.881843 |
| 9             | 1             | 0           | 0.367190                | 2.600138 | -3.898980 |
| 10            | 1             | 0           | 0.680808                | 1.232044 | -2.807098 |
| 11            | 8             | 0           | -1.455236               | 2.209100 | -1.613090 |
| 12            | 8             | 0           | -0.505002               | 4.191001 | -2.051013 |
| 13            | 6             | 0           | -1.489577               | 4.826066 | -1.220013 |
| 14            | 1             | 0           | -1.433405               | 5.886751 | -1.467012 |
| 15            | 1             | 0           | -2.484721               | 4.432682 | -1.436209 |
| 16            | 1             | 0           | -1.251557               | 4.672439 | -0.163772 |

|     |   |   |           |           |           |     |   |   |           |           |           |
|-----|---|---|-----------|-----------|-----------|-----|---|---|-----------|-----------|-----------|
| 86  | 1 | 0 | 7.559409  | 1.913503  | -0.239308 | 155 | 1 | 0 | -4.724795 | -1.645593 | -6.329893 |
| 87  | 1 | 0 | 7.826229  | 2.737658  | -1.779289 | 156 | 1 | 0 | -5.400940 | -0.123524 | -5.755425 |
| 88  | 1 | 0 | 6.289819  | 2.943356  | -0.924639 | 157 | 6 | 0 | -3.938696 | 0.016116  | 2.617574  |
| 89  | 6 | 0 | 5.956425  | 1.525115  | -3.297932 | 158 | 6 | 0 | -2.884825 | 0.915156  | 3.305728  |
| 90  | 1 | 0 | 5.556063  | 0.712729  | -3.913060 | 159 | 6 | 0 | -5.183244 | -0.145908 | 3.523136  |
| 91  | 1 | 0 | 5.150261  | 2.250482  | -3.136914 | 160 | 1 | 0 | -3.494601 | -0.979752 | 2.530148  |
| 92  | 1 | 0 | 6.744078  | 2.022870  | -3.876871 | 161 | 6 | 0 | -2.510441 | 0.382295  | 4.697157  |
| 93  | 6 | 0 | -6.059228 | 3.657111  | -0.151531 | 162 | 1 | 0 | -3.283432 | 1.935283  | 3.406752  |
| 94  | 6 | 0 | -5.209562 | 4.745180  | 0.544564  | 163 | 1 | 0 | -1.993526 | 0.982355  | 2.673008  |
| 95  | 1 | 0 | -5.738891 | 5.706018  | 0.533729  | 164 | 6 | 0 | -4.803967 | -0.678603 | 4.913897  |
| 96  | 1 | 0 | -4.996677 | 4.496377  | 1.588927  | 165 | 1 | 0 | -5.689723 | 0.823562  | 3.633560  |
| 97  | 1 | 0 | -4.250248 | 4.881295  | 0.033110  | 166 | 1 | 0 | -5.904232 | -0.818977 | 3.041541  |
| 98  | 6 | 0 | -6.351505 | 4.128442  | -1.588819 | 167 | 6 | 0 | -3.746735 | 0.206280  | 5.591171  |
| 99  | 1 | 0 | -7.017789 | 3.438295  | -2.118110 | 168 | 1 | 0 | -1.787297 | 1.056337  | 5.174720  |
| 100 | 1 | 0 | -6.845069 | 5.106932  | -1.564918 | 169 | 1 | 0 | -2.002150 | -0.587060 | 4.584578  |
| 101 | 1 | 0 | -5.433283 | 4.232994  | -2.178505 | 170 | 1 | 0 | -5.699760 | -0.753517 | 5.544487  |
| 102 | 6 | 0 | -7.408600 | 3.519012  | 0.594763  | 171 | 1 | 0 | -4.408649 | -1.700570 | 4.813278  |
| 103 | 1 | 0 | -7.954366 | 4.470948  | 0.583613  | 172 | 1 | 0 | -3.460359 | -0.218803 | 6.562180  |
| 104 | 1 | 0 | -8.040128 | 2.758579  | 0.121545  | 173 | 1 | 0 | -4.184466 | 1.194213  | 5.800352  |
| 105 | 1 | 0 | -7.262314 | 3.226942  | 1.640089  |     |   |   |           |           |           |
| 106 | 6 | 0 | 3.321254  | -2.882577 | -1.750973 |     |   |   |           |           |           |
| 107 | 6 | 0 | 2.503822  | -2.537626 | -3.017532 |     |   |   |           |           |           |
| 108 | 6 | 0 | 4.438765  | -3.899781 | -2.086717 |     |   |   |           |           |           |
| 109 | 1 | 0 | 2.638290  | -3.392935 | -1.065561 |     |   |   |           |           |           |
| 110 | 6 | 0 | 1.947907  | -3.802432 | -3.690666 |     |   |   |           |           |           |
| 111 | 1 | 0 | 3.143466  | -2.001545 | -3.734270 |     |   |   |           |           |           |
| 112 | 1 | 0 | 1.684143  | -1.862405 | -2.749265 |     |   |   |           |           |           |
| 113 | 6 | 0 | 3.875179  | -5.161035 | -2.759198 |     |   |   |           |           |           |
| 114 | 1 | 0 | 5.174859  | -3.433214 | -2.756886 |     |   |   |           |           |           |
| 115 | 1 | 0 | 4.980232  | -4.166064 | -1.169870 |     |   |   |           |           |           |
| 116 | 6 | 0 | 3.058448  | -4.813150 | -4.012262 |     |   |   |           |           |           |
| 117 | 1 | 0 | 1.402610  | -3.531176 | -4.603923 |     |   |   |           |           |           |
| 118 | 1 | 0 | 1.212885  | -4.271074 | -3.019428 |     |   |   |           |           |           |
| 119 | 1 | 0 | 4.693008  | -5.847865 | -3.014010 |     |   |   |           |           |           |
| 120 | 1 | 0 | 3.231285  | -5.695200 | -2.044543 |     |   |   |           |           |           |
| 121 | 1 | 0 | 2.631315  | -5.723091 | -4.453717 |     |   |   |           |           |           |
| 122 | 1 | 0 | 3.729623  | -4.383283 | -4.771348 |     |   |   |           |           |           |
| 123 | 6 | 0 | 3.897227  | 0.239000  | 2.337577  |     |   |   |           |           |           |
| 124 | 6 | 0 | 5.165327  | 0.105056  | 3.216792  |     |   |   |           |           |           |
| 125 | 6 | 0 | 3.321401  | 1.668560  | 2.454538  |     |   |   |           |           |           |
| 126 | 1 | 0 | 3.140407  | -0.429599 | 2.758193  |     |   |   |           |           |           |
| 127 | 6 | 0 | 4.892657  | 0.490796  | 4.678564  |     |   |   |           |           |           |
| 128 | 1 | 0 | 5.957595  | 0.753503  | 2.815675  |     |   |   |           |           |           |
| 129 | 1 | 0 | 5.554737  | -0.919716 | 3.162979  |     |   |   |           |           |           |
| 130 | 6 | 0 | 3.057664  | 2.059430  | 3.917569  |     |   |   |           |           |           |
| 131 | 1 | 0 | 4.016483  | 2.393582  | 2.009261  |     |   |   |           |           |           |
| 132 | 1 | 0 | 2.388400  | 1.721462  | 1.885508  |     |   |   |           |           |           |
| 133 | 6 | 0 | 4.314126  | 1.908602  | 4.786686  |     |   |   |           |           |           |
| 134 | 1 | 0 | 5.816595  | 0.408478  | 5.266108  |     |   |   |           |           |           |
| 135 | 1 | 0 | 4.180373  | -0.225333 | 5.114630  |     |   |   |           |           |           |
| 136 | 1 | 0 | 2.684823  | 3.090954  | 3.961473  |     |   |   |           |           |           |
| 137 | 1 | 0 | 2.258757  | 1.420614  | 4.322023  |     |   |   |           |           |           |
| 138 | 1 | 0 | 4.086736  | 2.149049  | 5.833494  |     |   |   |           |           |           |
| 139 | 1 | 0 | 5.072820  | 2.634047  | 4.456374  |     |   |   |           |           |           |
| 140 | 6 | 0 | -4.387007 | -0.521285 | -2.517045 |     |   |   |           |           |           |
| 141 | 6 | 0 | -5.772946 | -0.929943 | -3.077185 |     |   |   |           |           |           |
| 142 | 6 | 0 | -3.594676 | 0.238133  | -3.607273 |     |   |   |           |           |           |
| 143 | 1 | 0 | -3.828718 | -1.441373 | -2.319289 |     |   |   |           |           |           |
| 144 | 6 | 0 | -5.652115 | -1.759225 | -4.364668 |     |   |   |           |           |           |
| 145 | 1 | 0 | -6.359256 | -0.022833 | -3.283470 |     |   |   |           |           |           |
| 146 | 1 | 0 | -6.337418 | -1.489281 | -2.320828 |     |   |   |           |           |           |
| 147 | 6 | 0 | -3.471115 | -0.590450 | -4.896392 |     |   |   |           |           |           |
| 148 | 1 | 0 | -4.091757 | 1.190653  | -3.839431 |     |   |   |           |           |           |
| 149 | 1 | 0 | -2.599671 | 0.482729  | -3.229044 |     |   |   |           |           |           |
| 150 | 6 | 0 | -4.842846 | -1.017120 | -5.437436 |     |   |   |           |           |           |
| 151 | 1 | 0 | -6.651398 | -2.010173 | -4.744586 |     |   |   |           |           |           |
| 152 | 1 | 0 | -5.156826 | -2.713888 | -4.133327 |     |   |   |           |           |           |
| 153 | 1 | 0 | -2.924948 | -0.016240 | -5.656573 |     |   |   |           |           |           |
| 154 | 1 | 0 | -2.867036 | -1.486064 | -4.690502 |     |   |   |           |           |           |

TS-2nd-(S)-reaction pathway: S-si(S)-1bg (SPINOL)

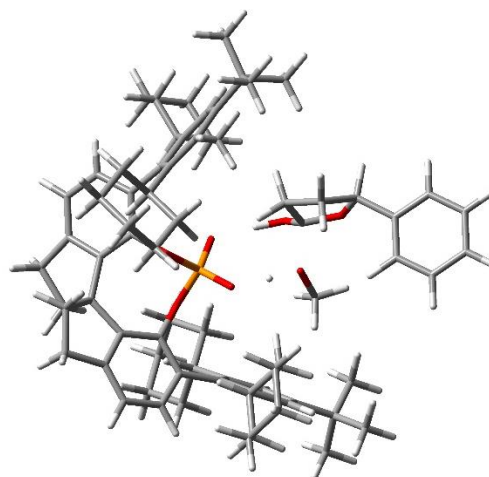

B3LYP/6-31G(d); E(B3LYP) = -3667.78289566 hartree

Zero-point Energy Correction = 1.518508 hartree

Thermal Correction to Energy = 1.593401 hartree

Thermal correction to Enthalpy = 1.594345 hartree

Thermal correction to Gibbs Free Energy = 1.404206 hartree

Sum of electronic and Zero-point Energies = -3666.264388 hartree

Sum of electronic and thermal Energies = -3666.189495 hartree

Sum of electronic and thermal Enthalpies = -3666.188551 hartree

Sum of electronic and thermal Free Energies = -3666.378690 hartree

The number of Imaginary frequencies = 1

| Center Number | Atomic Number | Atomic Type | Coordinates (Angstroms) |           |           |
|---------------|---------------|-------------|-------------------------|-----------|-----------|
|               |               |             | X                       | Y         | Z         |
| 1             | 6             | 0           | -1.209347               | -3.846914 | 0.271279  |
| 2             | 6             | 0           | -1.786859               | -2.577905 | 0.300058  |
| 3             | 6             | 0           | -3.780759               | -3.469749 | -0.703758 |
| 4             | 6             | 0           | -3.170888               | -4.713324 | -0.862161 |
| 5             | 6             | 0           | -1.879603               | -4.893143 | -0.382035 |
| 6             | 1             | 0           | -4.805795               | -3.331210 | -1.031728 |
| 7             | 1             | 0           | -3.705728               | -5.527435 | -1.345165 |
| 8             | 6             | 0           | -1.006987               | -6.127677 | -0.451306 |
| 9             | 1             | 0           | -1.358858               | -6.909320 | 0.236611  |
| 10            | 1             | 0           | -0.996617               | -6.573913 | -1.452498 |
| 11            | 6             | 0           | 0.047584                | -4.396764 | 0.939273  |
| 12            | 6             | 0           | 0.374762                | -5.583457 | -0.027778 |
| 13            | 1             | 0           | 0.904245                | -5.188329 | -0.902502 |
| 14            | 1             | 0           | 1.015811                | -6.339227 | 0.436607  |

|    |    |   |           |           |           |     |   |   |           |           |           |
|----|----|---|-----------|-----------|-----------|-----|---|---|-----------|-----------|-----------|
| 15 | 6  | 0 | -0.290155 | -4.967459 | 2.359329  | 84  | 1 | 0 | -4.878964 | 3.990083  | -0.225797 |
| 16 | 1  | 0 | -0.829315 | -4.199786 | 2.926635  | 85  | 6 | 0 | -7.787948 | 2.080137  | -0.428813 |
| 17 | 1  | 0 | -0.927202 | -5.855909 | 2.312537  | 86  | 1 | 0 | -8.233255 | 1.252514  | 0.134795  |
| 18 | 6  | 0 | 1.084185  | -5.227283 | 3.009294  | 87  | 1 | 0 | -8.485689 | 2.926510  | -0.399704 |
| 19 | 1  | 0 | 1.453645  | -6.235729 | 2.775568  | 88  | 1 | 0 | -7.692579 | 1.759967  | -1.471627 |
| 20 | 1  | 0 | 1.058564  | -5.148006 | 4.102285  | 89  | 6 | 0 | -6.658316 | 2.976454  | 1.613897  |
| 21 | 6  | 0 | 1.948070  | -4.161444 | 2.372368  | 90  | 1 | 0 | -7.125321 | 2.205601  | 2.236836  |
| 22 | 6  | 0 | 1.297355  | -3.585905 | 1.269473  | 91  | 1 | 0 | -5.725387 | 3.286471  | 2.099141  |
| 23 | 6  | 0 | 3.217648  | -3.738283 | 2.746073  | 92  | 1 | 0 | -7.330169 | 3.842394  | 1.603023  |
| 24 | 1  | 0 | 3.736054  | -4.199894 | 3.582910  | 93  | 6 | 0 | 6.416285  | 2.149007  | -1.577637 |
| 25 | 6  | 0 | 1.877413  | -2.491494 | 0.627553  | 94  | 6 | 0 | 5.714417  | 2.727814  | -2.828908 |
| 26 | 6  | 0 | 3.823840  | -2.711953 | 2.024562  | 95  | 1 | 0 | 6.363838  | 3.457527  | -3.328023 |
| 27 | 1  | 0 | 4.829141  | -2.395080 | 2.284693  | 96  | 1 | 0 | 5.467949  | 1.948826  | -3.557517 |
| 28 | 8  | 0 | -1.051730 | -1.512012 | 0.822589  | 97  | 1 | 0 | 4.782263  | 3.237438  | -2.557745 |
| 29 | 8  | 0 | 1.187820  | -1.880932 | -0.417544 | 98  | 6 | 0 | 6.763494  | 3.320581  | -0.639411 |
| 30 | 15 | 0 | 0.032687  | -0.752049 | -0.144051 | 99  | 1 | 0 | 7.301278  | 2.983019  | 0.253621  |
| 31 | 8  | 0 | 0.573147  | 0.379073  | 0.728350  | 100 | 1 | 0 | 7.409345  | 4.034390  | -1.163311 |
| 32 | 8  | 0 | -0.537794 | -0.404591 | -1.491981 | 101 | 1 | 0 | 5.868279  | 3.863022  | -0.313842 |
| 33 | 6  | 0 | -3.103049 | -2.365319 | -0.159333 | 102 | 6 | 0 | 7.739368  | 1.470245  | -2.007056 |
| 34 | 6  | 0 | 3.166717  | -2.040379 | 0.978673  | 103 | 1 | 0 | 7.565254  | 0.650615  | -2.711801 |
| 35 | 6  | 0 | -3.828962 | -1.053655 | -0.066792 | 104 | 1 | 0 | 8.401860  | 2.196530  | -2.494279 |
| 36 | 6  | 0 | -4.167601 | -0.508787 | 1.194981  | 105 | 1 | 0 | 8.266485  | 1.057302  | -1.139393 |
| 37 | 6  | 0 | -4.295749 | -0.409753 | -1.245105 | 106 | 6 | 0 | 3.948344  | -2.235308 | -1.926570 |
| 38 | 6  | 0 | 3.885576  | -0.912695 | 0.296943  | 107 | 6 | 0 | 3.103022  | -1.853192 | -3.164525 |
| 39 | 6  | 0 | 4.280371  | 0.228283  | 1.039689  | 108 | 6 | 0 | 5.210768  | -3.021276 | -2.356438 |
| 40 | 6  | 0 | 4.289457  | -1.027861 | -1.058455 | 109 | 1 | 0 | 3.343881  | -2.927850 | -1.334055 |
| 41 | 6  | 0 | -0.561513 | 2.858027  | -1.266253 | 110 | 6 | 0 | 2.746519  | -3.087648 | -4.006566 |
| 42 | 8  | 0 | -0.458870 | 4.161511  | -1.621374 | 111 | 1 | 0 | 3.665296  | -1.143849 | -3.789292 |
| 43 | 8  | 0 | 0.802777  | 2.593594  | -0.309368 | 112 | 1 | 0 | 2.189720  | -1.342891 | -2.841269 |
| 44 | 1  | 0 | -0.505942 | 1.086675  | -2.032719 | 113 | 6 | 0 | 4.847880  | -4.254003 | -3.199646 |
| 45 | 6  | 0 | -1.243793 | 5.015404  | -0.723727 | 114 | 1 | 0 | 5.873755  | -2.367181 | -2.940533 |
| 46 | 6  | 0 | -1.692949 | 4.080250  | 0.417691  | 115 | 1 | 0 | 5.778181  | -3.322558 | -1.466415 |
| 47 | 6  | 0 | -1.685627 | 2.701772  | -0.249452 | 116 | 6 | 0 | 3.998470  | -3.874108 | -4.421666 |
| 48 | 1  | 0 | -2.111245 | 5.335220  | -1.312682 | 117 | 1 | 0 | 2.175081  | -2.783256 | -4.892864 |
| 49 | 1  | 0 | -0.977683 | 4.114455  | 1.243910  | 118 | 1 | 0 | 2.083969  | -3.741428 | -3.420119 |
| 50 | 1  | 0 | -2.673141 | 4.368216  | 0.806854  | 119 | 1 | 0 | 5.761779  | -4.774012 | -3.515740 |
| 51 | 1  | 0 | -1.530987 | 1.870179  | 0.437991  | 120 | 1 | 0 | 4.285336  | -4.964653 | -2.575842 |
| 52 | 1  | 0 | -2.606309 | 2.512391  | -0.811308 | 121 | 1 | 0 | 3.716991  | -4.774162 | -4.983858 |
| 53 | 8  | 0 | -0.435714 | 2.059921  | -2.316545 | 122 | 1 | 0 | 4.603643  | -3.256933 | -5.102924 |
| 54 | 6  | 0 | 2.034487  | 2.686618  | -1.062573 | 123 | 6 | 0 | 3.873403  | 0.460557  | 2.495318  |
| 55 | 1  | 0 | 2.854802  | 2.564902  | -0.356133 | 124 | 6 | 0 | 5.087854  | 0.440245  | 3.455400  |
| 56 | 1  | 0 | 2.079142  | 1.909838  | -1.828684 | 125 | 6 | 0 | 3.073670  | 1.771282  | 2.692222  |
| 57 | 1  | 0 | 2.060747  | 3.674416  | -1.523953 | 126 | 1 | 0 | 3.205648  | -0.351946 | 2.797200  |
| 58 | 6  | 0 | -0.445932 | 6.230807  | -0.317865 | 127 | 6 | 0 | 4.664640  | 0.633658  | 4.920032  |
| 59 | 6  | 0 | 0.765783  | 6.102640  | 0.376304  | 128 | 1 | 0 | 5.788959  | 1.238816  | 3.172778  |
| 60 | 6  | 0 | -0.921962 | 7.510463  | -0.619308 | 129 | 1 | 0 | 5.639273  | -0.502018 | 3.344459  |
| 61 | 6  | 0 | 1.482092  | 7.234577  | 0.759633  | 130 | 6 | 0 | 2.646545  | 1.958598  | 4.156493  |
| 62 | 1  | 0 | 1.146129  | 5.112598  | 0.611207  | 131 | 1 | 0 | 3.686817  | 2.632204  | 2.386855  |
| 63 | 6  | 0 | -0.209770 | 8.646449  | -0.228486 | 132 | 1 | 0 | 2.190017  | 1.753642  | 2.048302  |
| 64 | 1  | 0 | -1.856257 | 7.620092  | -1.165489 | 133 | 6 | 0 | 3.849362  | 1.921406  | 5.109062  |
| 65 | 6  | 0 | 0.994873  | 8.510231  | 0.460488  | 134 | 1 | 0 | 5.551230  | 0.644057  | 5.567718  |
| 66 | 1  | 0 | 2.421410  | 7.122766  | 1.294673  | 135 | 1 | 0 | 4.057584  | -0.227567 | 5.235943  |
| 67 | 1  | 0 | -0.593919 | 9.634183  | -0.468457 | 136 | 1 | 0 | 2.101627  | 2.905338  | 4.268238  |
| 68 | 1  | 0 | 1.553866  | 9.391850  | 0.762366  | 137 | 1 | 0 | 1.941007  | 1.160321  | 4.428782  |
| 69 | 1  | 0 | 0.719346  | 1.594858  | 0.146684  | 138 | 1 | 0 | 3.516519  | 2.011881  | 6.151267  |
| 70 | 6  | 0 | -5.469933 | 1.272785  | 0.114464  | 139 | 1 | 0 | 4.495145  | 2.790187  | 4.910434  |
| 71 | 6  | 0 | 5.506065  | 1.104370  | -0.904172 | 140 | 6 | 0 | -3.965106 | -0.905025 | -2.652571 |
| 72 | 6  | 0 | -5.105775 | 0.724083  | -1.121454 | 141 | 6 | 0 | -5.199479 | -1.500092 | -3.374282 |
| 73 | 1  | 0 | -5.475318 | 1.186096  | -2.032360 | 142 | 6 | 0 | -3.336779 | 0.191708  | -3.543747 |
| 74 | 6  | 0 | -4.967318 | 0.642668  | 1.253930  | 143 | 1 | 0 | -3.216935 | -1.699207 | -2.566273 |
| 75 | 1  | 0 | -5.221766 | 1.030644  | 2.233569  | 144 | 6 | 0 | -4.835123 | -2.050466 | -4.762385 |
| 76 | 6  | 0 | 5.075833  | -0.017952 | -1.621531 | 145 | 1 | 0 | -5.966180 | -0.718358 | -3.480433 |
| 77 | 1  | 0 | 5.382662  | -0.130748 | -2.657307 | 146 | 1 | 0 | -5.654462 | -2.291037 | -2.765762 |
| 78 | 6  | 0 | 5.085161  | 1.199953  | 0.424091  | 147 | 6 | 0 | -2.955804 | -0.357885 | -4.926565 |
| 79 | 1  | 0 | 5.390544  | 2.053461  | 1.019002  | 148 | 1 | 0 | -4.049575 | 1.018673  | -3.677228 |
| 80 | 6  | 0 | -6.420344 | 2.483889  | 0.173606  | 149 | 1 | 0 | -2.456454 | 0.608377  | -3.049664 |
| 81 | 6  | 0 | -5.838356 | 3.661176  | -0.643104 | 150 | 6 | 0 | -4.164051 | -0.982281 | -5.638658 |
| 82 | 1  | 0 | -5.673649 | 3.392858  | -1.691596 | 151 | 1 | 0 | -5.733060 | -2.442743 | -5.258046 |
| 83 | 1  | 0 | -6.524739 | 4.516659  | -0.622696 | 152 | 1 | 0 | -4.148480 | -2.901119 | -4.639875 |

|     |   |   |           |           |           |
|-----|---|---|-----------|-----------|-----------|
| 153 | 1 | 0 | -2.525141 | 0.444141  | -5.539830 |
| 154 | 1 | 0 | -2.167987 | -1.115484 | -4.807208 |
| 155 | 1 | 0 | -3.861598 | -1.415130 | -6.601202 |
| 156 | 1 | 0 | -4.896382 | -0.193076 | -5.867439 |
| 157 | 6 | 0 | -3.754745 | -1.153703 | 2.514817  |
| 158 | 6 | 0 | -2.870341 | -0.226121 | 3.380309  |
| 159 | 6 | 0 | -4.975925 | -1.648520 | 3.327524  |
| 160 | 1 | 0 | -3.156420 | -2.042227 | 2.293188  |
| 161 | 6 | 0 | -2.446554 | -0.908754 | 4.690147  |
| 162 | 1 | 0 | -3.424210 | 0.693892  | 3.618820  |
| 163 | 1 | 0 | -1.985468 | 0.070568  | 2.806902  |
| 164 | 6 | 0 | -4.543934 | -2.332285 | 4.634109  |
| 165 | 1 | 0 | -5.633048 | -0.799469 | 3.564771  |
| 166 | 1 | 0 | -5.570038 | -2.338568 | 2.714742  |
| 167 | 6 | 0 | -3.658145 | -1.413004 | 5.487765  |
| 168 | 1 | 0 | -1.851051 | -0.215160 | 5.298072  |
| 169 | 1 | 0 | -1.787502 | -1.757781 | 4.454731  |
| 170 | 1 | 0 | -5.428497 | -2.646570 | 5.203575  |
| 171 | 1 | 0 | -3.986504 | -3.250098 | 4.393883  |
| 172 | 1 | 0 | -3.328289 | -1.936720 | 6.394542  |
| 173 | 1 | 0 | -4.253372 | -0.550653 | 5.824682  |

|    |    |   |           |           |           |
|----|----|---|-----------|-----------|-----------|
| 9  | 1  | 0 | -1.260461 | 2.147642  | 6.020958  |
| 10 | 1  | 0 | -0.820384 | 0.445364  | 6.076866  |
| 11 | 6  | 0 | -0.005853 | 2.274272  | 3.332745  |
| 12 | 6  | 0 | 0.425842  | 1.647774  | 4.699910  |
| 13 | 1  | 0 | 0.989886  | 0.728234  | 4.504708  |
| 14 | 1  | 0 | 1.067727  | 2.315404  | 5.283280  |
| 15 | 6  | 0 | -0.418696 | 3.770465  | 3.557903  |
| 16 | 1  | 0 | -1.039825 | 4.092879  | 2.714107  |
| 17 | 1  | 0 | -1.002680 | 3.909637  | 4.472594  |
| 18 | 6  | 0 | 0.911401  | 4.548851  | 3.551176  |
| 19 | 1  | 0 | 1.354777  | 4.594007  | 4.555996  |
| 20 | 1  | 0 | 0.795897  | 5.584621  | 3.211844  |
| 21 | 6  | 0 | 1.760861  | 3.723209  | 2.611775  |
| 22 | 6  | 0 | 1.178849  | 2.464773  | 2.386530  |
| 23 | 6  | 0 | 2.957237  | 4.073601  | 1.999112  |
| 24 | 1  | 0 | 3.416892  | 5.040910  | 2.186238  |
| 25 | 6  | 0 | 1.756301  | 1.605573  | 1.450105  |
| 26 | 8  | 0 | -1.204781 | 1.374331  | 0.634673  |
| 27 | 8  | 0 | 1.129452  | 0.387229  | 1.177715  |
| 28 | 15 | 0 | -0.092199 | 0.314455  | 0.086956  |
| 29 | 8  | 0 | 0.328861  | 0.790945  | -1.276770 |
| 30 | 8  | 0 | -0.606260 | -1.120097 | 0.222714  |
| 31 | 6  | 0 | -3.188020 | 0.609298  | 1.801490  |
| 32 | 6  | 0 | 2.976570  | 1.926124  | 0.820260  |
| 33 | 6  | 0 | -3.948830 | 0.381614  | 0.526980  |
| 34 | 6  | 0 | -4.275242 | 1.472429  | -0.315323 |
| 35 | 6  | 0 | -4.416905 | -0.916120 | 0.185821  |
| 36 | 6  | 0 | 3.565524  | 3.161235  | 1.138769  |
| 37 | 1  | 0 | 4.517030  | 3.408765  | 0.678609  |
| 38 | 6  | 0 | 3.709127  | 1.017031  | -0.127069 |
| 39 | 6  | 0 | 3.825264  | 1.348780  | -1.497679 |
| 40 | 6  | 0 | 4.415144  | -0.103519 | 0.380957  |
| 41 | 6  | 0 | 0.020041  | -1.971665 | -3.020766 |
| 42 | 8  | 0 | -0.404006 | -2.739138 | -1.584495 |
| 43 | 6  | 0 | 0.678178  | -3.707179 | -1.399906 |
| 44 | 6  | 0 | 1.552433  | -1.971936 | -2.884331 |
| 45 | 1  | 0 | 1.959524  | -2.325131 | -3.835263 |
| 46 | 1  | 0 | 1.899117  | -0.950819 | -2.720125 |
| 47 | 8  | 0 | -0.656954 | -0.831143 | -3.054555 |
| 48 | 8  | 0 | -0.372405 | -2.854940 | -3.969165 |
| 49 | 6  | 0 | -1.779662 | -2.884857 | -4.269352 |
| 50 | 1  | 0 | -1.911476 | -3.734510 | -4.940722 |
| 51 | 1  | 0 | -2.087051 | -1.960251 | -4.762587 |
| 52 | 1  | 0 | -2.362692 | -3.028155 | -3.355776 |
| 53 | 1  | 0 | -0.484271 | -1.965918 | -0.740054 |
| 54 | 1  | 0 | -0.269227 | -0.141098 | -2.421926 |
| 55 | 6  | 0 | 0.635333  | -4.434635 | -0.076561 |
| 56 | 6  | 0 | 0.777407  | -3.777667 | 1.155096  |
| 57 | 6  | 0 | 0.501967  | -5.829428 | -0.086307 |
| 58 | 6  | 0 | 0.783888  | -4.507948 | 2.343738  |
| 59 | 1  | 0 | 0.852259  | -2.696419 | 1.191363  |
| 60 | 6  | 0 | 0.518645  | -6.560355 | 1.102388  |
| 61 | 1  | 0 | 0.389307  | -6.349001 | -1.035278 |
| 62 | 6  | 0 | 0.659517  | -5.899109 | 2.322328  |
| 63 | 1  | 0 | 0.887438  | -3.984936 | 3.290542  |
| 64 | 1  | 0 | 0.417894  | -7.641969 | 1.073375  |
| 65 | 1  | 0 | 0.669822  | -6.462838 | 3.251406  |
| 66 | 1  | 0 | 0.517054  | -4.436081 | -2.199207 |
| 67 | 6  | 0 | 1.940522  | -2.892584 | -1.706764 |
| 68 | 1  | 0 | 2.784624  | -3.546997 | -1.940624 |
| 69 | 1  | 0 | 2.223457  | -2.294343 | -0.835559 |
| 70 | 6  | 0 | -5.507852 | -0.018823 | -1.827476 |
| 71 | 6  | 0 | 5.360561  | -0.540101 | -1.845320 |

TS-1st-(S)-reaction pathway: S-syn/(S)-1bg (SPINOL)

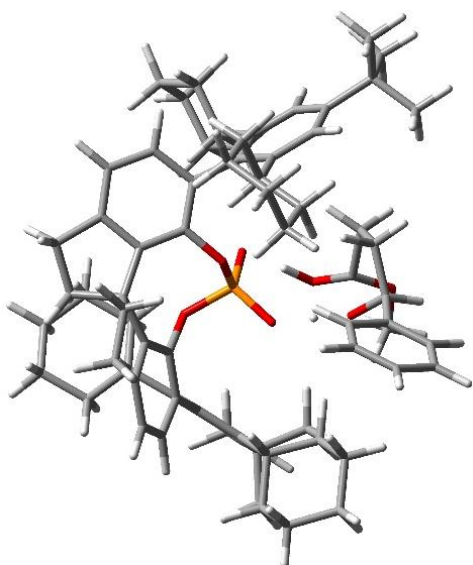

B3LYP/6-31G(d); E(B3LYP) = -3667.77999606 hartree

Zero-point Energy Correction = 1.517549 hartree

Thermal Correction to Energy = 1.592480 hartree

Thermal correction to Enthalpy = 1.593424 hartree

Thermal correction to Gibbs Free Energy = 1.404042 hartree

Sum of electronic and Zero-point Energies = -3666.262447 hartree

Sum of electronic and thermal Energies = -3666.187516 hartree

Sum of electronic and thermal Enthalpies = -3666.186572 hartree

Sum of electronic and thermal Free Energies = -3666.375954 hartree

The number of Imaginary frequencies = 1

| Center Number | Atomic Number | Atomic Type | Coordinates (Angstroms) |           |          |
|---------------|---------------|-------------|-------------------------|-----------|----------|
|               |               |             | X                       | Y         | Z        |
| 1             | 6             | 0           | -1.243769               | 1.433506  | 3.034312 |
| 2             | 6             | 0           | -1.877251               | 1.127101  | 1.832499 |
| 3             | 6             | 0           | -3.793429               | 0.336069  | 3.040135 |
| 4             | 6             | 0           | -3.118321               | 0.496855  | 4.250956 |
| 5             | 6             | 0           | -1.838631               | 1.039847  | 4.242546 |
| 6             | 1             | 0           | -4.812796               | -0.036103 | 3.043074 |
| 7             | 1             | 0           | -3.598428               | 0.213772  | 5.184578 |
| 8             | 6             | 0           | -0.907230               | 1.308131  | 5.406048 |

|     |   |   |           |           |           |     |   |   |           |           |           |
|-----|---|---|-----------|-----------|-----------|-----|---|---|-----------|-----------|-----------|
| 72  | 6 | 0 | 5.215718  | -0.852042 | -0.487172 | 135 | 1 | 0 | 2.827329  | 5.382138  | -2.180744 |
| 73  | 1 | 0 | 5.772216  | -1.689638 | -0.077410 | 136 | 1 | 0 | 1.089266  | 3.269863  | -4.853104 |
| 74  | 6 | 0 | 4.645389  | 0.560578  | -2.320722 | 137 | 1 | 0 | 0.895599  | 3.852810  | -3.203869 |
| 75  | 1 | 0 | 4.734554  | 0.842409  | -3.363274 | 138 | 1 | 0 | 2.116385  | 5.551168  | -4.547315 |
| 76  | 6 | 0 | -5.038720 | 1.244473  | -1.468750 | 139 | 1 | 0 | 3.313351  | 4.351306  | -5.027155 |
| 77  | 1 | 0 | -5.274429 | 2.097582  | -2.093989 | 140 | 6 | 0 | -4.146889 | -2.154009 | 1.039529  |
| 78  | 6 | 0 | -5.180913 | -1.077861 | -0.973604 | 141 | 6 | 0 | -5.428692 | -2.645679 | 1.757487  |
| 79  | 1 | 0 | -5.531133 | -2.076285 | -1.215591 | 142 | 6 | 0 | -3.525834 | -3.325360 | 0.244007  |
| 80  | 6 | 0 | -6.353930 | -0.273162 | -3.088831 | 143 | 1 | 0 | -3.418025 | -1.885750 | 1.811079  |
| 81  | 6 | 0 | -6.607028 | 1.013962  | -3.896446 | 144 | 6 | 0 | -5.149092 | -3.851906 | 2.667316  |
| 82  | 1 | 0 | -7.209367 | 0.782619  | -4.782609 | 145 | 1 | 0 | -6.177309 | -2.924044 | 1.001312  |
| 83  | 1 | 0 | -7.154904 | 1.760737  | -3.310610 | 146 | 1 | 0 | -5.876661 | -1.830648 | 2.339586  |
| 84  | 1 | 0 | -5.671745 | 1.469450  | -4.240737 | 147 | 6 | 0 | -3.229340 | -4.526171 | 1.156011  |
| 85  | 6 | 0 | -5.619486 | -1.278569 | -4.007552 | 148 | 1 | 0 | -4.216694 | -3.647720 | -0.548825 |
| 86  | 1 | 0 | -5.451146 | -2.237531 | -3.506056 | 149 | 1 | 0 | -2.610638 | -2.989236 | -0.251080 |
| 87  | 1 | 0 | -6.208687 | -1.473197 | -4.912577 | 150 | 6 | 0 | -4.489266 | -5.002288 | 1.893260  |
| 88  | 1 | 0 | -4.643607 | -0.883831 | -4.313299 | 151 | 1 | 0 | -6.081498 | -4.192213 | 3.137204  |
| 89  | 6 | 0 | -7.725456 | -0.861818 | -2.681391 | 152 | 1 | 0 | -4.483681 | -3.537579 | 3.485163  |
| 90  | 1 | 0 | -8.338432 | -1.056431 | -3.570443 | 153 | 1 | 0 | -2.799283 | -5.346192 | 0.567050  |
| 91  | 1 | 0 | -7.617756 | -1.805195 | -2.136205 | 154 | 1 | 0 | -2.462390 | -4.240752 | 1.889498  |
| 92  | 1 | 0 | -8.273347 | -0.164919 | -2.036846 | 155 | 1 | 0 | -4.245760 | -5.828691 | 2.573984  |
| 93  | 6 | 0 | 6.316710  | -1.364296 | -2.729527 | 156 | 1 | 0 | -5.207805 | -5.402216 | 1.161557  |
| 94  | 6 | 0 | 5.908835  | -2.855821 | -2.710044 | 157 | 6 | 0 | -3.880101 | 2.914344  | -0.008210 |
| 95  | 1 | 0 | 6.610801  | -3.451689 | -3.306473 | 158 | 6 | 0 | -3.005588 | 3.542323  | -1.119172 |
| 96  | 1 | 0 | 5.903345  | -3.266032 | -1.694915 | 159 | 6 | 0 | -5.113813 | 3.806035  | 0.273508  |
| 97  | 1 | 0 | 4.907160  | -2.993554 | -3.133648 | 160 | 1 | 0 | -3.282208 | 2.923868  | 0.908026  |
| 98  | 6 | 0 | 7.757223  | -1.227248 | -2.179721 | 161 | 6 | 0 | -2.598078 | 4.981194  | -0.768048 |
| 99  | 1 | 0 | 8.459500  | -1.801924 | -2.796436 | 162 | 1 | 0 | -3.564519 | 3.551761  | -2.066011 |
| 100 | 1 | 0 | 8.078678  | -0.179563 | -2.184358 | 163 | 1 | 0 | -2.117719 | 2.922421  | -1.279989 |
| 101 | 1 | 0 | 7.836244  | -1.595423 | -1.151506 | 164 | 6 | 0 | -4.704606 | 5.246619  | 0.619070  |
| 102 | 6 | 0 | 6.318698  | -0.891117 | -4.195724 | 165 | 1 | 0 | -5.769773 | 3.818376  | -0.608503 |
| 103 | 1 | 0 | 5.324399  | -0.966716 | -4.650775 | 166 | 1 | 0 | -5.703333 | 3.371749  | 1.091243  |
| 104 | 1 | 0 | 6.657912  | 0.146462  | -4.289495 | 167 | 6 | 0 | -3.820901 | 5.863279  | -0.475689 |
| 105 | 1 | 0 | 7.001213  | -1.514916 | -4.784310 | 168 | 1 | 0 | -2.003972 | 5.412309  | -1.584474 |
| 106 | 6 | 0 | 4.421019  | -0.444367 | 1.869107  | 169 | 1 | 0 | -1.942427 | 4.964235  | 0.115781  |
| 107 | 6 | 0 | 4.237912  | -1.945588 | 2.179311  | 170 | 1 | 0 | -5.599231 | 5.862644  | 0.779808  |
| 108 | 6 | 0 | 5.708347  | 0.084314  | 2.549527  | 171 | 1 | 0 | -4.152147 | 5.246580  | 1.570766  |
| 109 | 1 | 0 | 3.580814  | 0.073653  | 2.342397  | 172 | 1 | 0 | -3.504509 | 6.873748  | -0.184951 |
| 110 | 6 | 0 | 4.218795  | -2.204947 | 3.693975  | 173 | 1 | 0 | -4.412989 | 5.974835  | -1.396667 |
| 111 | 1 | 0 | 5.058383  | -2.528045 | 1.737321  |     |   |   |           |           |           |
| 112 | 1 | 0 | 3.312368  | -2.311786 | 1.720209  |     |   |   |           |           |           |
| 113 | 6 | 0 | 5.711154  | -0.188642 | 4.061603  |     |   |   |           |           |           |
| 114 | 1 | 0 | 6.581349  | -0.397348 | 2.084977  |     |   |   |           |           |           |
| 115 | 1 | 0 | 5.808848  | 1.160124  | 2.359329  |     |   |   |           |           |           |
| 116 | 6 | 0 | 5.492303  | -1.676932 | 4.371310  |     |   |   |           |           |           |
| 117 | 1 | 0 | 4.100209  | -3.278916 | 3.887791  |     |   |   |           |           |           |
| 118 | 1 | 0 | 3.341092  | -1.708752 | 4.135288  |     |   |   |           |           |           |
| 119 | 1 | 0 | 6.654218  | 0.158393  | 4.503792  |     |   |   |           |           |           |
| 120 | 1 | 0 | 4.910759  | 0.399845  | 4.534192  |     |   |   |           |           |           |
| 121 | 1 | 0 | 5.443372  | -1.837484 | 5.456175  |     |   |   |           |           |           |
| 122 | 1 | 0 | 6.357337  | -2.252412 | 4.008784  |     |   |   |           |           |           |
| 123 | 6 | 0 | 3.143693  | 2.570156  | -2.111635 |     |   |   |           |           |           |
| 124 | 6 | 0 | 4.163795  | 3.699017  | -2.407646 |     |   |   |           |           |           |
| 125 | 6 | 0 | 2.339518  | 2.257665  | -3.395186 |     |   |   |           |           |           |
| 126 | 1 | 0 | 2.424103  | 2.957028  | -1.382709 |     |   |   |           |           |           |
| 127 | 6 | 0 | 3.479853  | 4.959338  | -2.958923 |     |   |   |           |           |           |
| 128 | 1 | 0 | 4.900586  | 3.332736  | -3.137918 |     |   |   |           |           |           |
| 129 | 1 | 0 | 4.729370  | 3.946635  | -1.501274 |     |   |   |           |           |           |
| 130 | 6 | 0 | 1.642312  | 3.515305  | -3.936999 |     |   |   |           |           |           |
| 131 | 1 | 0 | 3.008443  | 1.861734  | -4.173079 |     |   |   |           |           |           |
| 132 | 1 | 0 | 1.596835  | 1.487269  | -3.175846 |     |   |   |           |           |           |
| 133 | 6 | 0 | 2.641954  | 4.649133  | -4.207448 |     |   |   |           |           |           |
| 134 | 1 | 0 | 4.232908  | 5.726045  | -3.184762 |     |   |   |           |           |           |

TS-2nd-(S)-reaction pathway: S-re/(S)-1bg (SPINOL)

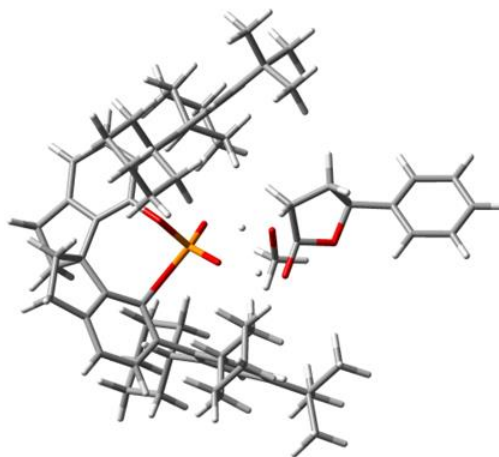

B3LYP/6-31G(d); E(B3LYP) = -3667.78401199 hartree  
Zero-point Energy Correction = 1.518896 hartree  
Thermal Correction to Energy = 1.593894 hartree  
Thermal correction to Enthalpy = 1.594838 hartree

|                                                                   |               |             |                         |           |           |           |
|-------------------------------------------------------------------|---------------|-------------|-------------------------|-----------|-----------|-----------|
| Thermal correction to Gibbs Free Energy= 1.404594 hartree         | 60            | 6           | 0                       | -1.532072 | 9.075991  | 0.500220  |
| Sum of electronic and Zero-point Energies = -3666.265116 hartree  | 61            | 1           | 0                       | -3.102428 | 9.136682  | -0.977466 |
| Sum of electronic and thermal Energies = -3666.190118 hartree     | 62            | 1           | 0                       | 0.063848  | 8.701469  | 1.902325  |
| Sum of electronic and thermal Enthalpies = -3666.189174 hartree   | 63            | 1           | 0                       | -1.574613 | 10.141570 | 0.708811  |
| Sum of electronic and thermal Free Energies= -3666.379418 hartree | 64            | 6           | 0                       | -3.561242 | -1.595613 | -0.229268 |
| The number of Imaginary frequencies = 1                           | 65            | 6           | 0                       | -3.914188 | -1.549380 | 1.144599  |
|                                                                   | 66            | 6           | 0                       | -4.110867 | -0.635223 | -1.114522 |
|                                                                   | 67            | 6           | 0                       | 3.913980  | -0.468408 | 0.286421  |
|                                                                   | 68            | 6           | 0                       | 4.028883  | 0.436090  | 1.375955  |
|                                                                   | 69            | 6           | 0                       | 4.266933  | -0.033825 | -1.012030 |
|                                                                   | 70            | 6           | 0                       | -5.381281 | 0.378963  | 0.730140  |
|                                                                   | 71            | 6           | 0                       | 4.796544  | 2.204588  | -0.151655 |
|                                                                   | 72            | 6           | 0                       | -5.006945 | 0.322150  | -0.613656 |
|                                                                   | 73            | 1           | 0                       | -5.427257 | 1.035755  | -1.313022 |
|                                                                   | 74            | 6           | 0                       | -4.806975 | -0.568464 | 1.584961  |
|                                                                   | 75            | 1           | 0                       | -5.072258 | -0.558551 | 2.638304  |
|                                                                   | 76            | 6           | 0                       | 4.470713  | 1.738108  | 1.126798  |
|                                                                   | 77            | 1           | 0                       | 4.555021  | 2.416595  | 1.970203  |
|                                                                   | 78            | 6           | 0                       | 4.691530  | 1.290174  | -1.201517 |
|                                                                   | 79            | 1           | 0                       | 4.962362  | 1.596824  | -2.205753 |
|                                                                   | 80            | 6           | 0                       | 3.714819  | 0.049826  | 2.821217  |
|                                                                   | 81            | 6           | 0                       | 5.004920  | -0.036663 | 3.674575  |
|                                                                   | 82            | 6           | 0                       | 2.696379  | 0.990797  | 3.507476  |
|                                                                   | 83            | 1           | 0                       | 3.258113  | -0.944643 | 2.819050  |
|                                                                   | 84            | 6           | 0                       | 4.710997  | -0.477511 | 5.116779  |
|                                                                   | 85            | 1           | 0                       | 5.494575  | 0.948138  | 3.687149  |
|                                                                   | 86            | 1           | 0                       | 5.720869  | -0.725644 | 3.208330  |
|                                                                   | 87            | 6           | 0                       | 2.399766  | 0.542688  | 4.947749  |
|                                                                   | 88            | 1           | 0                       | 3.087001  | 2.018173  | 3.528727  |
|                                                                   | 89            | 1           | 0                       | 1.773662  | 1.006705  | 2.922161  |
|                                                                   | 90            | 6           | 0                       | 3.679982  | 0.440580  | 5.788753  |
|                                                                   | 91            | 1           | 0                       | 5.641257  | -0.499711 | 5.699895  |
|                                                                   | 92            | 1           | 0                       | 4.324425  | -1.507572 | 5.106152  |
|                                                                   | 93            | 1           | 0                       | 1.691435  | 1.238645  | 5.416546  |
|                                                                   | 94            | 1           | 0                       | 1.901830  | -0.437837 | 4.924413  |
|                                                                   | 95            | 1           | 0                       | 3.448309  | 0.078331  | 6.799033  |
|                                                                   | 96            | 1           | 0                       | 4.115150  | 1.444420  | 5.908390  |
|                                                                   | 97            | 6           | 0                       | 4.270418  | -0.969608 | -2.217138 |
|                                                                   | 98            | 6           | 0                       | 3.356363  | -0.488986 | -3.367599 |
|                                                                   | 99            | 6           | 0                       | 5.705247  | -1.219303 | -2.742684 |
|                                                                   | 100           | 1           | 0                       | 3.885294  | -1.942915 | -1.897170 |
|                                                                   | 101           | 6           | 0                       | 3.368171  | -1.474205 | -4.547096 |
|                                                                   | 102           | 1           | 0                       | 3.696103  | 0.495246  | -3.722646 |
|                                                                   | 103           | 1           | 0                       | 2.335368  | -0.363333 | -2.991253 |
|                                                                   | 104           | 6           | 0                       | 5.714949  | -2.202266 | -3.923784 |
|                                                                   | 105           | 1           | 0                       | 6.151281  | -0.265567 | -3.059779 |
|                                                                   | 106           | 1           | 0                       | 6.334334  | -1.599050 | -1.927538 |
|                                                                   | 107           | 6           | 0                       | 4.792837  | -1.733193 | -5.058822 |
|                                                                   | 108           | 1           | 0                       | 2.734771  | -1.094502 | -5.359649 |
|                                                                   | 109           | 1           | 0                       | 2.919703  | -2.425659 | -4.224149 |
|                                                                   | 110           | 1           | 0                       | 6.740052  | -2.333805 | -4.294463 |
|                                                                   | 111           | 1           | 0                       | 5.381572  | -3.190416 | -3.573220 |
|                                                                   | 112           | 1           | 0                       | 4.779375  | -2.473153 | -5.869757 |
|                                                                   | 113           | 1           | 0                       | 5.195710  | -0.804338 | -5.490352 |
|                                                                   | 114           | 6           | 0                       | -3.788989 | -0.602416 | -2.608079 |
|                                                                   | 115           | 6           | 0                       | -4.985717 | -1.073515 | -3.471451 |
|                                                                   | 116           | 6           | 0                       | -3.323136 | 0.786226  | -3.104459 |
|                                                                   | 117           | 1           | 0                       | -2.956130 | -1.289233 | -2.789527 |
|                                                                   | 118           | 6           | 0                       | -4.633460 | -1.105042 | -4.967072 |
|                                                                   | 119           | 1           | 0                       | -5.834476 | -0.392666 | -3.309219 |
|                                                                   | 120           | 1           | 0                       | -5.324985 | -2.064161 | -3.145828 |
|                                                                   | 121           | 6           | 0                       | -2.952388 | 0.754068  | -4.595595 |
|                                                                   | 122           | 1           | 0                       | -4.122947 | 1.526112  | -2.956823 |
|                                                                   | 123           | 1           | 0                       | -2.466433 | 1.118291  | -2.512551 |
|                                                                   | 124           | 6           | 0                       | -4.120355 | 0.255974  | -5.459057 |
|                                                                   | 125           | 1           | 0                       | -5.508713 | -1.416187 | -5.552583 |
|                                                                   | 126           | 1           | 0                       | -3.857826 | -1.866455 | -5.136251 |
|                                                                   | 127           | 1           | 0                       | -2.637032 | 1.753446  | -4.924693 |
|                                                                   | 128           | 1           | 0                       | -2.086171 | 0.090998  | -4.735464 |
| Center Number                                                     | Atomic Number | Atomic Type | Coordinates (Angstroms) |           |           |           |
|                                                                   |               |             | X                       | Y         | Z         |           |
| 1                                                                 | 6             | 0           | -0.084906               | 3.005443  | 0.007163  |           |
| 2                                                                 | 8             | 0           | -0.048589               | 4.334137  | -0.241530 |           |
| 3                                                                 | 8             | 0           | -0.286996               | 2.338497  | -1.575937 |           |
| 4                                                                 | 6             | 0           | -1.412692               | 4.842892  | -0.300118 |           |
| 5                                                                 | 6             | 0           | -2.151270               | 3.976075  | 0.739877  |           |
| 6                                                                 | 6             | 0           | -1.421929               | 2.621789  | 0.658462  |           |
| 7                                                                 | 1             | 0           | -1.799379               | 4.635489  | -1.305309 |           |
| 8                                                                 | 1             | 0           | -2.036666               | 4.425822  | 1.731156  |           |
| 9                                                                 | 1             | 0           | -3.219708               | 3.904529  | 0.521470  |           |
| 10                                                                | 1             | 0           | -1.230166               | 2.171248  | 1.634086  |           |
| 11                                                                | 1             | 0           | -1.963724               | 1.890036  | 0.057647  |           |
| 12                                                                | 8             | 0           | 1.069166                | 2.558375  | 0.450381  |           |
| 13                                                                | 6             | 0           | 0.817150                | 2.625391  | -2.459168 |           |
| 14                                                                | 1             | 0           | 1.759219                | 2.280597  | -2.024597 |           |
| 15                                                                | 1             | 0           | 0.621168                | 2.108852  | -3.401129 |           |
| 16                                                                | 1             | 0           | 0.846542                | 3.704042  | -2.617879 |           |
| 17                                                                | 1             | 0           | 0.977073                | 1.578455  | 0.724529  |           |
| 18                                                                | 1             | 0           | -0.368526               | 1.260949  | -1.464683 |           |
| 19                                                                | 6             | 0           | -0.610231               | -3.982684 | -0.804048 |           |
| 20                                                                | 6             | 0           | -1.348999               | -2.882020 | -0.371279 |           |
| 21                                                                | 6             | 0           | -3.243997               | -3.652301 | -1.632901 |           |
| 22                                                                | 6             | 0           | -2.482566               | -4.685696 | -2.179051 |           |
| 23                                                                | 6             | 0           | -1.163368               | -4.839255 | -1.769632 |           |
| 24                                                                | 1             | 0           | -4.288202               | -3.551452 | -1.910817 |           |
| 25                                                                | 1             | 0           | -2.922685               | -5.362894 | -2.907036 |           |
| 26                                                                | 6             | 0           | -0.140657               | -5.856192 | -2.229589 |           |
| 27                                                                | 1             | 0           | -0.358957               | -6.856171 | -1.829350 |           |
| 28                                                                | 1             | 0           | -0.112943               | -5.954900 | -3.320984 |           |
| 29                                                                | 6             | 0           | 0.735818                | -4.542252 | -0.347214 |           |
| 30                                                                | 6             | 0           | 1.174656                | -5.292325 | -1.648778 |           |
| 31                                                                | 1             | 0           | 1.608054                | -4.565214 | -2.345286 |           |
| 32                                                                | 1             | 0           | 1.929703                | -6.060394 | -1.454368 |           |
| 33                                                                | 6             | 0           | 0.539861                | -5.585476 | 0.806733  |           |
| 34                                                                | 1             | 0           | -0.077553               | -5.130697 | 1.590310  |           |
| 35                                                                | 1             | 0           | 0.032841                | -6.494589 | 0.469103  |           |
| 36                                                                | 6             | 0           | 1.962910                | -5.839853 | 1.346860  |           |
| 37                                                                | 1             | 0           | 2.460531                | -6.651430 | 0.797198  |           |
| 38                                                                | 1             | 0           | 1.969210                | -6.127279 | 2.404592  |           |
| 39                                                                | 6             | 0           | 2.641785                | -4.509489 | 1.104592  |           |
| 40                                                                | 6             | 0           | 1.875213                | -3.713879 | 0.238437  |           |
| 41                                                                | 6             | 0           | 3.841988                | -4.037361 | 1.622934  |           |
| 42                                                                | 1             | 0           | 4.450748                | -4.659913 | 2.274142  |           |
| 43                                                                | 6             | 0           | 2.262496                | -2.396359 | 0.002539  |           |
| 44                                                                | 6             | 0           | 4.255562                | -2.744547 | 1.301460  |           |
| 45                                                                | 1             | 0           | 5.200254                | -2.372385 | 1.686115  |           |
| 46                                                                | 8             | 0           | -0.755346               | -1.952502 | 0.481873  |           |
| 47                                                                | 8             | 0           | 1.452451                | -1.594358 | -0.798755 |           |
| 48                                                                | 15            | 0           | 0.193586                | -0.775513 | -0.141738 |           |
| 49                                                                | 8             | 0           | 0.604582                | 0.082898  | 1.028219  |           |
| 50                                                                | 8             | 0           | -0.473528               | -0.106633 | -1.337115 |           |
| 51                                                                | 6             | 0           | -2.695733               | -2.707548 | -0.749880 |           |
| 52                                                                | 6             | 0           | 3.467855                | -1.881149 | 0.522547  |           |
| 53                                                                | 6             | 0           | -1.415508               | 6.327294  | -0.040100 |           |
| 54                                                                | 6             | 0           | -2.325734               | 7.145252  | -0.717898 |           |
| 55                                                                | 6             | 0           | -0.556747               | 6.898340  | 0.907846  |           |
| 56                                                                | 6             | 0           | -2.389922               | 8.512531  | -0.445009 |           |
| 57                                                                | 1             | 0           | -2.987329               | 6.710783  | -1.464350 |           |
| 58                                                                | 6             | 0           | -0.612802               | 8.266285  | 1.171783  |           |
| 59                                                                | 1             | 0           | 0.165859                | 6.270780  | 1.420582  |           |

|     |   |   |           |           |           |
|-----|---|---|-----------|-----------|-----------|
| 129 | 1 | 0 | -3.818254 | 0.191071  | -6.512551 |
| 130 | 1 | 0 | -4.940260 | 0.988800  | -5.414007 |
| 131 | 6 | 0 | -3.388366 | -2.546943 | 2.171892  |
| 132 | 6 | 0 | -2.563698 | -1.859775 | 3.286354  |
| 133 | 6 | 0 | -4.514160 | -3.409883 | 2.790934  |
| 134 | 1 | 0 | -2.714769 | -3.243160 | 1.663822  |
| 135 | 6 | 0 | -2.006826 | -2.883212 | 4.287270  |
| 136 | 1 | 0 | -3.201090 | -1.142606 | 3.824303  |
| 137 | 1 | 0 | -1.746474 | -1.287120 | 2.835864  |
| 138 | 6 | 0 | -3.953118 | -4.431930 | 3.792633  |
| 139 | 1 | 0 | -5.239413 | -2.762156 | 3.304081  |
| 140 | 1 | 0 | -5.066969 | -3.922950 | 1.993438  |
| 141 | 6 | 0 | -3.119616 | -3.753180 | 4.890036  |
| 142 | 1 | 0 | -1.453095 | -2.366961 | 5.082288  |
| 143 | 1 | 0 | -1.279026 | -3.528313 | 3.772537  |
| 144 | 1 | 0 | -4.773643 | -5.009498 | 4.238418  |
| 145 | 1 | 0 | -3.321143 | -5.153884 | 3.254295  |
| 146 | 1 | 0 | -2.694067 | -4.507113 | 5.565248  |
| 147 | 1 | 0 | -3.778899 | -3.120924 | 5.503960  |
| 148 | 6 | 0 | 5.267781  | 3.658079  | -0.343061 |
| 149 | 6 | 0 | 4.209524  | 4.630635  | 0.231010  |
| 150 | 1 | 0 | 4.067652  | 4.488119  | 1.307086  |
| 151 | 1 | 0 | 4.524450  | 5.669755  | 0.072166  |
| 152 | 1 | 0 | 3.235217  | 4.486424  | -0.247435 |
| 153 | 6 | 0 | 6.606390  | 3.862307  | 0.406223  |
| 154 | 1 | 0 | 6.955279  | 4.896734  | 0.294659  |
| 155 | 1 | 0 | 6.504850  | 3.656952  | 1.477132  |
| 156 | 1 | 0 | 7.382819  | 3.196948  | 0.011156  |
| 157 | 6 | 0 | 5.488895  | 4.013755  | -1.825687 |
| 158 | 1 | 0 | 6.269201  | 3.395871  | -2.284302 |
| 159 | 1 | 0 | 4.570866  | 3.895919  | -2.413128 |
| 160 | 1 | 0 | 5.805020  | 5.059663  | -1.912018 |
| 161 | 6 | 0 | -6.396207 | 1.398813  | 1.279646  |
| 162 | 6 | 0 | -7.633570 | 0.641817  | 1.819842  |
| 163 | 1 | 0 | -8.372274 | 1.347593  | 2.220099  |
| 164 | 1 | 0 | -8.113623 | 0.060434  | 1.024476  |
| 165 | 1 | 0 | -7.363647 | -0.052177 | 2.622584  |
| 166 | 6 | 0 | -6.874969 | 2.392597  | 0.204145  |
| 167 | 1 | 0 | -6.042771 | 2.967426  | -0.219136 |
| 168 | 1 | 0 | -7.391628 | 1.886823  | -0.619231 |
| 169 | 1 | 0 | -7.579250 | 3.106457  | 0.646600  |
| 170 | 6 | 0 | -5.757413 | 2.210776  | 2.430686  |
| 171 | 1 | 0 | -5.423073 | 1.567275  | 3.250602  |
| 172 | 1 | 0 | -4.886940 | 2.775451  | 2.076640  |
| 173 | 1 | 0 | -6.480461 | 2.926086  | 2.841969  |



DFT calculation of real system using SPINOL-derived CPA (S)-1bh

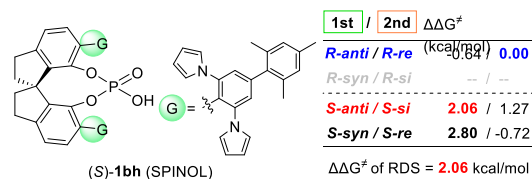

TS-1st-(R)-reaction pathway: R-anti/(S)-1bh (SPINOL)

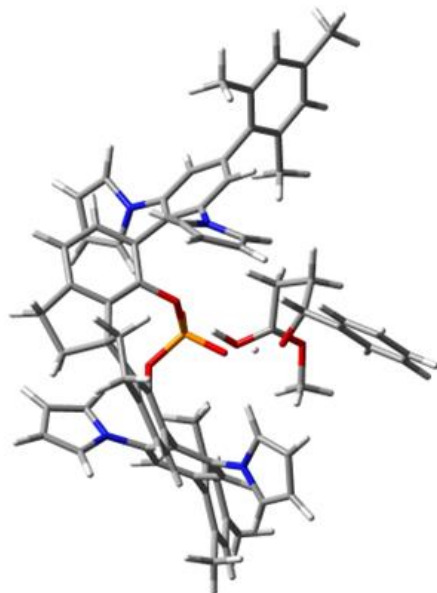

B3LYP/6-31G(d); E(B3LYP) = -3948.43775673 hartree

Zero-point Energy Correction = 1.264313 hartree

Thermal Correction to Energy = 1.340477 hartree

Thermal correction to Enthalpy = 1.341422 hartree

Thermal correction to Gibbs Free Energy = 1.143265 hartree

Sum of electronic and Zero-point Energies = -3947.173443 hartree

Sum of electronic and thermal Energies = -3947.097279 hartree

Sum of electronic and thermal Enthalpies = -3947.096335 hartree

Sum of electronic and thermal Free Energies = -3947.294492 hartree

The number of Imaginary frequencies = 1

| Center Number | Atomic Number | Atomic Type | Coordinates (Angstroms) |           |           |
|---------------|---------------|-------------|-------------------------|-----------|-----------|
|               |               |             | X                       | Y         | Z         |
| 1             | 6             | 0           | -0.242198               | -3.059258 | -0.460450 |
| 2             | 8             | 0           | -0.388468               | -2.467033 | 1.121718  |
| 3             | 6             | 0           | 0.862892                | -2.705520 | 1.845916  |
| 4             | 6             | 0           | 1.715574                | -3.557186 | 0.884137  |
| 5             | 6             | 0           | 1.275046                | -3.126470 | -0.516249 |
| 6             | 1             | 0           | 1.325367                | -1.721779 | 1.979319  |
| 7             | 1             | 0           | 1.513071                | -4.621259 | 1.034310  |
| 8             | 1             | 0           | 2.781075                | -3.390386 | 1.064336  |
| 9             | 1             | 0           | 1.573942                | -3.831428 | -1.296531 |
| 10            | 1             | 0           | 1.656684                | -2.133786 | -0.774131 |
| 11            | 8             | 0           | -0.917975               | -2.221788 | -1.237229 |
| 12            | 8             | 0           | -0.779013               | -4.293362 | -0.386468 |
| 13            | 6             | 0           | -2.216913               | -4.376813 | -0.355734 |
| 14            | 1             | 0           | -2.437886               | -5.420995 | -0.131455 |
| 15            | 1             | 0           | -2.639850               | -4.101082 | -1.323238 |
| 16            | 1             | 0           | -2.617595               | -3.728964 | 0.428259  |
| 17            | 1             | 0           | -0.564484               | -1.368438 | 1.129179  |
| 18            | 1             | 0           | -0.453130               | -1.321861 | -1.325763 |
| 19            | 6             | 0           | 1.006884                | 4.010669  | 0.072107  |
| 20            | 6             | 0           | 1.633506                | 2.767348  | -0.016272 |

|    |    |   |           |           |           |
|----|----|---|-----------|-----------|-----------|
| 21 | 6  | 0 | 3.286203  | 3.708946  | -1.500251 |
| 22 | 6  | 0 | 2.618788  | 4.930131  | -1.497320 |
| 23 | 6  | 0 | 1.481885  | 5.074694  | -0.710199 |
| 24 | 1  | 0 | 4.185700  | 3.590393  | -2.095749 |
| 25 | 1  | 0 | 2.987081  | 5.754702  | -2.102018 |
| 26 | 6  | 0 | 0.597380  | 6.290848  | -0.556768 |
| 27 | 1  | 0 | 1.076986  | 7.050034  | 0.077604  |
| 28 | 1  | 0 | 0.379066  | 6.773583  | -1.516158 |
| 29 | 6  | 0 | -0.129827 | 4.497693  | 0.966796  |
| 30 | 6  | 0 | -0.659304 | 5.703724  | 0.115705  |
| 31 | 1  | 0 | -1.348276 | 5.324083  | -0.646605 |
| 32 | 1  | 0 | -1.205516 | 6.429949  | 0.725729  |
| 33 | 6  | 0 | 0.387682  | 5.014956  | 2.350152  |
| 34 | 1  | 0 | 1.042547  | 4.255438  | 2.791677  |
| 35 | 1  | 0 | 0.965370  | 5.940392  | 2.256910  |
| 36 | 6  | 0 | -0.891551 | 5.179105  | 3.205008  |
| 37 | 1  | 0 | -1.314211 | 6.188852  | 3.105710  |
| 38 | 1  | 0 | -0.706463 | 5.020762  | 4.273768  |
| 39 | 6  | 0 | -1.821087 | 4.134952  | 2.622130  |
| 40 | 6  | 0 | -1.297684 | 3.633685  | 1.420993  |
| 41 | 6  | 0 | -3.030848 | 3.660034  | 3.118847  |
| 42 | 1  | 0 | -3.442894 | 4.046547  | 4.047460  |
| 43 | 6  | 0 | -1.929215 | 2.564445  | 0.798467  |
| 44 | 6  | 0 | -3.721881 | 2.680506  | 2.404614  |
| 45 | 1  | 0 | -4.681699 | 2.325857  | 2.767320  |
| 46 | 8  | 0 | 1.102796  | 1.686712  | 0.685683  |
| 47 | 8  | 0 | -1.295974 | 1.927126  | -0.272561 |
| 48 | 15 | 0 | -0.142829 | 0.823618  | 0.075130  |
| 49 | 8  | 0 | -0.594304 | -0.053079 | 1.241037  |
| 50 | 8  | 0 | 0.222232  | 0.125569  | -1.213012 |
| 51 | 6  | 0 | 2.810510  | 2.603984  | -0.772790 |
| 52 | 6  | 0 | -3.185096 | 2.105759  | 1.241992  |
| 53 | 6  | 0 | 0.589606  | -3.321120 | 3.196755  |
| 54 | 6  | 0 | 1.046227  | -2.687387 | 4.356461  |
| 55 | 6  | 0 | -0.107858 | -4.531563 | 3.309143  |
| 56 | 6  | 0 | 0.826246  | -3.260210 | 5.611192  |
| 57 | 1  | 0 | 1.568313  | -1.736281 | 4.278528  |
| 58 | 6  | 0 | -0.335512 | -5.099430 | 4.560504  |
| 59 | 1  | 0 | -0.481098 | -5.018875 | 2.412453  |
| 60 | 6  | 0 | 0.135487  | -4.467119 | 5.714915  |
| 61 | 1  | 0 | 1.187676  | -2.758536 | 6.504713  |
| 62 | 1  | 0 | -0.882612 | -6.035229 | 4.637692  |
| 63 | 1  | 0 | -0.041679 | -4.912292 | 6.690257  |
| 64 | 6  | 0 | -3.938941 | 1.071779  | 0.476096  |
| 65 | 6  | 0 | -5.074943 | -1.089430 | 0.293278  |
| 66 | 6  | 0 | -4.940970 | 0.318532  | -1.634390 |
| 67 | 6  | 0 | -5.346056 | -0.890958 | -1.063955 |
| 68 | 1  | 0 | -5.370220 | -2.015377 | 0.775833  |
| 69 | 1  | 0 | -5.185946 | 0.544692  | -2.666828 |
| 70 | 6  | 0 | 3.632059  | 1.354752  | -0.792108 |
| 71 | 6  | 0 | 5.151217  | -0.219213 | 0.317949  |
| 72 | 6  | 0 | 4.928489  | -0.301211 | -2.060986 |
| 73 | 6  | 0 | 5.536906  | -0.785798 | -0.900052 |
| 74 | 1  | 0 | 5.614262  | -0.553045 | 1.240856  |
| 75 | 1  | 0 | 5.181485  | -0.725014 | -3.027494 |
| 76 | 6  | 0 | -6.062070 | -1.927918 | -1.870541 |
| 77 | 6  | 0 | -7.409076 | -3.907332 | -3.380268 |
| 78 | 6  | 0 | 6.066644  | -1.833459 | -0.964151 |
| 79 | 6  | 0 | 8.647010  | -3.790446 | -1.084018 |
| 80 | 6  | 0 | -4.256479 | 1.279032  | -0.886683 |
| 81 | 6  | 0 | -4.406784 | -0.128208 | 1.060319  |
| 82 | 6  | 0 | 4.226783  | 0.830710  | 0.379615  |
| 83 | 6  | 0 | 3.998858  | 0.742695  | -2.015395 |
| 84 | 6  | 0 | 7.317412  | -4.118261 | -1.354339 |
| 85 | 1  | 0 | 7.064581  | -5.146110 | -1.607879 |
| 86 | 6  | 0 | 6.294265  | -3.164940 | -1.307695 |
| 87 | 6  | 0 | 8.938228  | -2.463688 | -0.754746 |
| 88 | 1  | 0 | 9.968726  | -2.182855 | -0.544873 |
| 89 | 6  | 0 | 7.947706  | -1.479549 | -0.689979 |

|     |   |   |           |           |           |
|-----|---|---|-----------|-----------|-----------|
| 90  | 6 | 0 | -5.403767 | -2.575402 | -2.940520 |
| 91  | 6 | 0 | -6.088498 | -3.555590 | -3.667113 |
| 92  | 1 | 0 | -5.571947 | -4.055414 | -4.484675 |
| 93  | 6 | 0 | -8.049229 | -3.238848 | -2.334011 |
| 94  | 1 | 0 | -9.085872 | -3.479506 | -2.105301 |
| 95  | 6 | 0 | -7.402781 | -2.260668 | -1.572108 |
| 96  | 6 | 0 | 4.876791  | -3.589919 | -1.619673 |
| 97  | 1 | 0 | 4.164493  | -3.168456 | -0.904097 |
| 98  | 1 | 0 | 4.558255  | -3.254754 | -2.614720 |
| 99  | 1 | 0 | 4.783900  | -4.680387 | -1.595282 |
| 100 | 6 | 0 | 8.342892  | -0.058230 | -0.349549 |
| 101 | 1 | 0 | 7.914126  | 0.660431  | -1.056570 |
| 102 | 1 | 0 | 7.999747  | 0.239560  | 0.648225  |
| 103 | 1 | 0 | 9.431298  | 0.053746  | -0.370226 |
| 104 | 6 | 0 | 9.741932  | -4.828002 | -1.170776 |
| 105 | 1 | 0 | 10.266152 | -4.773814 | -2.134326 |
| 106 | 1 | 0 | 10.494078 | -4.685142 | -0.386854 |
| 107 | 1 | 0 | 9.341123  | -5.842394 | -1.074405 |
| 108 | 6 | 0 | -8.174129 | -1.566918 | -0.468483 |
| 109 | 1 | 0 | -7.884421 | -1.926283 | 0.526828  |
| 110 | 1 | 0 | -8.009398 | -0.484476 | -0.475497 |
| 111 | 1 | 0 | -9.247867 | -1.748216 | -0.579153 |
| 112 | 6 | 0 | -3.979878 | -2.239503 | -3.332483 |
| 113 | 1 | 0 | -3.930778 | -1.318160 | -3.926918 |
| 114 | 1 | 0 | -3.327738 | -2.089236 | -2.467288 |
| 115 | 1 | 0 | -3.552948 | -3.038574 | -3.947585 |
| 116 | 6 | 0 | -8.116519 | -4.988590 | -4.163467 |
| 117 | 1 | 0 | -7.740698 | -5.051501 | -5.190350 |
| 118 | 1 | 0 | -7.970017 | -5.975223 | -3.703225 |
| 119 | 1 | 0 | -9.196279 | -4.809981 | -4.208018 |
| 120 | 7 | 0 | 3.470848  | 1.190507  | -3.257628 |
| 121 | 6 | 0 | 4.246347  | 1.546279  | -4.352379 |
| 122 | 6 | 0 | 2.134026  | 1.295982  | -3.603026 |
| 123 | 6 | 0 | 3.402473  | 1.886665  | -5.382613 |
| 124 | 1 | 0 | 5.324235  | 1.551296  | -4.278681 |
| 125 | 6 | 0 | 2.067027  | 1.721106  | -4.909141 |
| 126 | 1 | 0 | 1.364211  | 1.022285  | -2.895488 |
| 127 | 1 | 0 | 3.709103  | 2.222434  | -6.364488 |
| 128 | 1 | 0 | 1.155632  | 1.888526  | -5.467521 |
| 129 | 7 | 0 | 3.969944  | 1.379068  | 1.669822  |
| 130 | 6 | 0 | 3.689550  | 0.621976  | 2.795238  |
| 131 | 6 | 0 | 4.110924  | 2.700696  | 2.055990  |
| 132 | 6 | 0 | 3.635081  | 1.459849  | 3.883164  |
| 133 | 1 | 0 | 3.534831  | -0.443350 | 2.707844  |
| 134 | 6 | 0 | 3.907111  | 2.778989  | 3.414209  |
| 135 | 1 | 0 | 4.364486  | 3.459592  | 1.332559  |
| 136 | 1 | 0 | 3.413700  | 1.163924  | 4.899880  |
| 137 | 1 | 0 | 3.959475  | 3.682307  | 4.007221  |
| 138 | 7 | 0 | -3.940856 | 2.504508  | -1.541808 |
| 139 | 6 | 0 | -3.273217 | 2.607894  | -2.749679 |
| 140 | 6 | 0 | -4.384883 | 3.762881  | -1.172738 |
| 141 | 6 | 0 | -3.279067 | 3.926863  | -3.136251 |
| 142 | 1 | 0 | -2.810429 | 1.736626  | -3.188651 |
| 143 | 6 | 0 | -3.989592 | 4.659445  | -2.137830 |
| 144 | 1 | 0 | -4.954193 | 3.897360  | -0.265679 |
| 145 | 1 | 0 | -2.813705 | 4.325162  | -4.027871 |
| 146 | 1 | 0 | -4.196878 | 5.721412  | -2.133759 |
| 147 | 7 | 0 | -4.259550 | -0.408329 | 2.449407  |
| 148 | 6 | 0 | -5.317952 | -0.790426 | 3.263226  |
| 149 | 6 | 0 | -3.096099 | -0.421875 | 3.200280  |
| 150 | 6 | 0 | -4.826753 | -1.034799 | 4.523349  |
| 151 | 1 | 0 | -6.323479 | -0.819406 | 2.869488  |
| 152 | 6 | 0 | -3.419418 | -0.807271 | 4.480041  |
| 153 | 1 | 0 | -2.150726 | -0.166334 | 2.747839  |
| 154 | 1 | 0 | -5.412991 | -1.336178 | 5.381473  |
| 155 | 1 | 0 | -2.716918 | -0.921753 | 5.294773  |

TS-2nd-(R)-reaction pathway: R-re(S)-1bh (SPINOL)

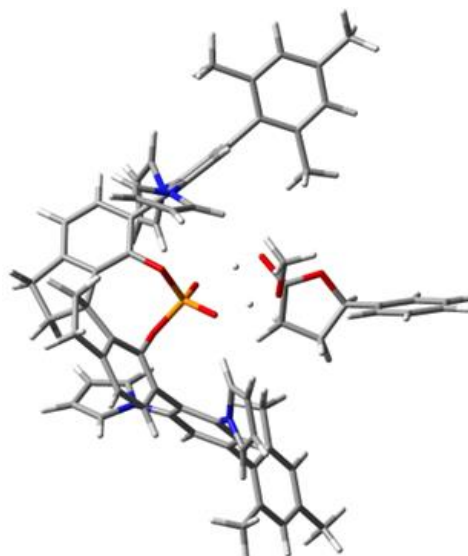

B3LYP/6-31G(d); E(B3LYP) = -3948.43608343 hartree

Zero-point Energy Correction = 1.264041 hartree

Thermal Correction to Energy = 1.340517hartree

Thermal correction to Enthalpy = 1.341461 hartree

Thermal correction to Gibbs Free Energy= 1.142604 hartree

Sum of electronic and Zero-point Energies = -3947.172042 hartree

Sum of electronic and thermal Energies = -3947.095566 hartree

Sum of electronic and thermal Enthalpies = -3947.094622 hartree

Sum of electronic and thermal Free Energies= -3947.293479 hartree

The number of Imaginary frequencies = 1

| Center Number | Atomic Number | Atomic Type | Coordinates (Angstroms) |           |           |
|---------------|---------------|-------------|-------------------------|-----------|-----------|
|               |               |             | X                       | Y         | Z         |
| 1             | 6             | 0           | -0.393574               | 2.700638  | -0.286561 |
| 2             | 8             | 0           | -0.753177               | 3.995443  | -0.144801 |
| 3             | 8             | 0           | -0.208547               | 2.165890  | 1.325057  |
| 4             | 6             | 0           | 0.418001                | 4.880196  | -0.246381 |
| 5             | 6             | 0           | 1.632749                | 3.929596  | -0.247460 |
| 6             | 6             | 0           | 1.043655                | 2.621107  | -0.782578 |
| 7             | 1             | 0           | 0.320121                | 5.368933  | -1.222303 |
| 8             | 1             | 0           | 2.014266                | 3.790995  | 0.767025  |
| 9             | 1             | 0           | 2.444737                | 4.323793  | -0.863812 |
| 10            | 1             | 0           | 1.558074                | 1.720386  | -0.446785 |
| 11            | 1             | 0           | 1.001166                | 2.605100  | -1.877433 |
| 12            | 8             | 0           | -1.357660               | 1.969461  | -0.817265 |
| 13            | 6             | 0           | -1.425571               | 2.243866  | 2.095618  |
| 14            | 1             | 0           | -1.680502               | 3.296288  | 2.220888  |
| 15            | 1             | 0           | -1.221578               | 1.782427  | 3.064190  |
| 16            | 1             | 0           | -2.235365               | 1.716917  | 1.583898  |
| 17            | 1             | 0           | 0.099737                | 1.111484  | 1.294096  |
| 18            | 1             | 0           | -1.019419               | 1.031138  | -1.024315 |
| 19            | 6             | 0           | -1.165097               | -4.262015 | -0.000194 |
| 20            | 6             | 0           | -1.787666               | -3.016112 | 0.002768  |
| 21            | 6             | 0           | -3.458333               | -3.846541 | -1.524564 |
| 22            | 6             | 0           | -2.792084               | -5.066570 | -1.613536 |
| 23            | 6             | 0           | -1.648098               | -5.269231 | -0.848891 |
| 24            | 1             | 0           | -4.361209               | -3.683264 | -2.104503 |
| 25            | 1             | 0           | -3.167036               | -5.845074 | -2.272816 |
| 26            | 6             | 0           | -0.759423               | -6.491289 | -0.784696 |
| 27            | 1             | 0           | -1.234768               | -7.295742 | -0.205418 |
| 28            | 1             | 0           | -0.541963               | -6.903814 | -1.776579 |
| 29            | 6             | 0           | -0.026643               | -4.804851 | 0.855428  |
| 30            | 6             | 0           | 0.500298                | -5.951592 | -0.075356 |
| 31            | 1             | 0           | 1.188741                | -5.522748 | -0.811578 |
| 32            | 1             | 0           | 1.045737                | -6.718676 | 0.483466  |

|     |    |   |           |           |           |     |   |   |            |           |           |
|-----|----|---|-----------|-----------|-----------|-----|---|---|------------|-----------|-----------|
| 33  | 6  | 0 | -0.549794 | -5.412164 | 2.199654  | 102 | 1 | 0 | -8.060528  | -0.358917 | 0.098823  |
| 34  | 1  | 0 | -1.212993 | -4.686721 | 2.683683  | 103 | 1 | 0 | -9.429571  | 0.302833  | -0.809759 |
| 35  | 1  | 0 | -1.121217 | -6.332726 | 2.042945  | 104 | 6 | 0 | -9.200762  | 5.246733  | -0.383860 |
| 36  | 6  | 0 | 0.722671  | -5.622644 | 3.052125  | 105 | 1 | 0 | -8.805677  | 6.101937  | 0.174785  |
| 37  | 1  | 0 | 1.155558  | -6.619855 | 2.889659  | 106 | 1 | 0 | -9.409153  | 5.593623  | -1.405051 |
| 38  | 1  | 0 | 0.528600  | -5.536534 | 4.127513  | 107 | 1 | 0 | -10.160281 | 4.964143  | 0.063015  |
| 39  | 6  | 0 | 1.647721  | -4.535944 | 2.546415  | 108 | 6 | 0 | 4.322062   | 2.248656  | -2.938020 |
| 40  | 6  | 0 | 1.136650  | -3.965918 | 1.370525  | 109 | 1 | 0 | 4.164881   | 1.350671  | -3.548284 |
| 41  | 6  | 0 | 2.845654  | -4.085017 | 3.091480  | 110 | 1 | 0 | 3.633177   | 2.174968  | -2.090873 |
| 42  | 1  | 0 | 3.245437  | -4.526515 | 4.000714  | 111 | 1 | 0 | 4.030313   | 3.110387  | -3.547125 |
| 43  | 6  | 0 | 1.773476  | -2.857470 | 0.821746  | 112 | 6 | 0 | 8.254374   | 0.900069  | 0.040646  |
| 44  | 6  | 0 | 3.540783  | -3.060769 | 2.449369  | 113 | 1 | 0 | 7.920664   | 1.210264  | 1.038535  |
| 45  | 1  | 0 | 4.493250  | -2.724404 | 2.847254  | 114 | 1 | 0 | 7.996348   | -0.158989 | -0.064996 |
| 46  | 8  | 0 | -1.229185 | -1.984522 | 0.757710  | 115 | 1 | 0 | 9.345066   | 0.987678  | 0.019821  |
| 47  | 8  | 0 | 1.165922  | -2.165784 | -0.228834 | 116 | 6 | 0 | 8.815877   | 4.463079  | -3.474910 |
| 48  | 15 | 0 | -0.011647 | -1.092503 | 0.126781  | 117 | 1 | 0 | 9.382486   | 3.974928  | -4.279242 |
| 49  | 8  | 0 | 0.430870  | -0.192725 | 1.278911  | 118 | 1 | 0 | 8.231716   | 5.268875  | -3.931710 |
| 50  | 8  | 0 | -0.397100 | -0.422278 | -1.168538 | 119 | 1 | 0 | 9.546019   | 4.916689  | -2.795646 |
| 51  | 6  | 0 | -2.972833 | -2.797411 | -0.725899 | 120 | 7 | 0 | -3.686116  | -1.196691 | -3.097548 |
| 52  | 6  | 0 | 3.019894  | -2.421800 | 1.312891  | 121 | 6 | 0 | -4.549633  | -1.402057 | -4.164510 |
| 53  | 6  | 0 | 0.385853  | 5.929547  | 0.837517  | 122 | 6 | 0 | -2.386096  | -1.391464 | -3.531826 |
| 54  | 6  | 0 | 0.285471  | 7.281162  | 0.493093  | 123 | 6 | 0 | -3.799005  | -1.736662 | -5.266365 |
| 55  | 6  | 0 | 0.468945  | 5.578337  | 2.192883  | 124 | 1 | 0 | -5.617517  | -1.316268 | -4.025297 |
| 56  | 6  | 0 | 0.275629  | 8.269597  | 1.479466  | 125 | 6 | 0 | -2.430060  | -1.722768 | -4.866072 |
| 57  | 1  | 0 | 0.213708  | 7.563413  | -0.554906 | 126 | 1 | 0 | -1.557517  | -1.242126 | -2.855112 |
| 58  | 6  | 0 | 0.449691  | 6.562535  | 3.179055  | 127 | 1 | 0 | -4.189121  | -1.970006 | -6.248323 |
| 59  | 1  | 0 | 0.548929  | 4.532122  | 2.474390  | 128 | 1 | 0 | -1.569806  | -1.927294 | -5.489587 |
| 60  | 6  | 0 | 0.355545  | 7.911393  | 2.824753  | 129 | 7 | 0 | -4.069663  | -1.776850 | 1.806165  |
| 61  | 1  | 0 | 0.200398  | 9.315677  | 1.195487  | 130 | 6 | 0 | -3.673046  | -1.189197 | 2.995062  |
| 62  | 1  | 0 | 0.513037  | 6.277848  | 4.225826  | 131 | 6 | 0 | -4.355295  | -3.109493 | 2.050218  |
| 63  | 1  | 0 | 0.344747  | 8.677511  | 3.595223  | 132 | 6 | 0 | -3.690782  | -2.145034 | 3.982051  |
| 64  | 6  | 0 | 3.808360  | -1.360413 | 0.620726  | 133 | 1 | 0 | -3.377538  | -0.151108 | 3.014912  |
| 65  | 6  | 0 | -3.758980 | -1.530067 | -0.640977 | 134 | 6 | 0 | -4.128905  | -3.363437 | 3.382818  |
| 66  | 6  | 0 | -5.456617 | 0.771750  | -0.503219 | 135 | 1 | 0 | -4.710525  | -3.747784 | 1.256243  |
| 67  | 6  | 0 | 5.414111  | 0.587843  | -0.735882 | 136 | 1 | 0 | -3.407331  | -1.992786 | 5.014847  |
| 68  | 6  | 0 | 5.056137  | 0.748892  | 0.606192  | 137 | 1 | 0 | -4.273097  | -4.315951 | 3.875214  |
| 69  | 1  | 0 | 5.370080  | 1.635290  | 1.147811  | 138 | 7 | 0 | 3.846384   | -2.688805 | -1.468671 |
| 70  | 6  | 0 | 4.289553  | -0.206861 | 1.284206  | 139 | 6 | 0 | 3.215617   | -2.695173 | -2.700594 |
| 71  | 6  | 0 | 4.967484  | -0.562512 | -1.391664 | 140 | 6 | 0 | 4.236220   | -3.982141 | -1.164477 |
| 72  | 1  | 0 | 5.264068  | -0.757343 | -2.417193 | 141 | 6 | 0 | 3.189982   | -3.987696 | -3.167138 |
| 73  | 6  | 0 | 4.186654  | -1.516226 | -0.733551 | 142 | 1 | 0 | 2.795238   | -1.783848 | -3.099128 |
| 74  | 6  | 0 | -5.113115 | 0.059577  | 0.648502  | 143 | 6 | 0 | 3.842898   | -4.803875 | -2.194790 |
| 75  | 1  | 0 | -5.532402 | 0.344385  | 1.608532  | 144 | 1 | 0 | 4.770496   | -4.191218 | -0.250225 |
| 76  | 6  | 0 | -4.289722 | -1.071403 | 0.587117  | 145 | 1 | 0 | 2.739689   | -4.314861 | -4.094670 |
| 77  | 6  | 0 | -4.937978 | 0.328725  | -1.722673 | 146 | 1 | 0 | 4.013446   | -5.870939 | -2.249485 |
| 78  | 1  | 0 | -5.170841 | 0.863535  | -2.637877 | 147 | 7 | 0 | 4.061189   | 0.021718  | 2.671054  |
| 79  | 6  | 0 | -4.113277 | -0.798113 | -1.799322 | 148 | 6 | 0 | 5.070994   | 0.342643  | 3.569093  |
| 80  | 6  | 0 | 6.280592  | 1.588971  | -1.435517 | 149 | 6 | 0 | 2.852549   | 0.014561  | 3.346926  |
| 81  | 6  | 0 | 7.633237  | 1.740939  | -1.054803 | 150 | 6 | 0 | 4.504286   | 0.528913  | 4.806868  |
| 82  | 6  | 0 | 5.759760  | 2.378048  | -2.483370 | 151 | 1 | 0 | 6.100395   | 0.372210  | 3.243227  |
| 83  | 6  | 0 | 8.427380  | 2.679089  | -1.721031 | 152 | 6 | 0 | 3.099473   | 0.326923  | 4.663246  |
| 84  | 6  | 0 | 6.589369  | 3.310060  | -3.116013 | 153 | 1 | 0 | 1.934835   | -0.200307 | 2.820979  |
| 85  | 6  | 0 | 7.927608  | 3.475911  | -2.754327 | 154 | 1 | 0 | 5.038818   | 0.773867  | 5.715178  |
| 86  | 1  | 0 | 9.469409  | 2.786167  | -1.425122 | 155 | 1 | 0 | 2.350667   | 0.401936  | 5.440735  |
| 87  | 1  | 0 | 6.174882  | 3.922743  | -3.914538 |     |   |   |            |           |           |
| 88  | 6  | 0 | -6.406933 | 1.930978  | -0.451019 |     |   |   |            |           |           |
| 89  | 6  | 0 | -7.793400 | 1.691695  | -0.571230 |     |   |   |            |           |           |
| 90  | 6  | 0 | -5.932996 | 3.248879  | -0.293959 |     |   |   |            |           |           |
| 91  | 6  | 0 | -8.677115 | 2.774132  | -0.532797 |     |   |   |            |           |           |
| 92  | 6  | 0 | -6.854043 | 4.302542  | -0.265141 |     |   |   |            |           |           |
| 93  | 6  | 0 | -8.228623 | 4.089714  | -0.385180 |     |   |   |            |           |           |
| 94  | 1  | 0 | -9.744928 | 2.583043  | -0.623095 |     |   |   |            |           |           |
| 95  | 1  | 0 | -6.481756 | 5.318322  | -0.144212 |     |   |   |            |           |           |
| 96  | 6  | 0 | -4.460290 | 3.545431  | -0.127485 |     |   |   |            |           |           |
| 97  | 1  | 0 | -4.114640 | 3.271952  | 0.877940  |     |   |   |            |           |           |
| 98  | 1  | 0 | -3.833397 | 2.991583  | -0.831417 |     |   |   |            |           |           |
| 99  | 1  | 0 | -4.258974 | 4.612998  | -0.259485 |     |   |   |            |           |           |
| 100 | 6  | 0 | -8.337585 | 0.289846  | -0.740392 |     |   |   |            |           |           |
| 101 | 1  | 0 | -7.948472 | -0.189044 | -1.646961 |     |   |   |            |           |           |

TS-1st-(S)-reaction pathway: S-anti(S)-1bh (SPINOL)

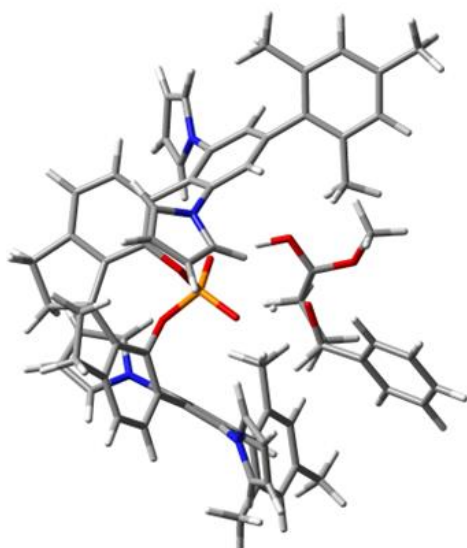

B3LYP/6-31G(d); E(B3LYP) = -3948.43378881 hartree

Zero-point Energy Correction = 1.263696 hartree

Thermal Correction to Energy = 1.339884 hartree

Thermal correction to Enthalpy = 1.340828 hartree

Thermal correction to Gibbs Free Energy = 1.143600 hartree

Sum of electronic and Zero-point Energies = -3947.170093 hartree

Sum of electronic and thermal Energies = -3947.093905 hartree

Sum of electronic and thermal Enthalpies = -3947.092961 hartree

Sum of electronic and thermal Free Energies = -3947.290189 hartree

The number of Imaginary frequencies = 1

| Center Number | Atomic Number | Atomic Type | Coordinates (Angstroms) |           |           |
|---------------|---------------|-------------|-------------------------|-----------|-----------|
|               |               |             | X                       | Y         | Z         |
| 1             | 6             | 0           | 0.173023                | -2.846299 | -1.138402 |
| 2             | 8             | 0           | -0.131294               | -2.541290 | 0.467786  |
| 3             | 6             | 0           | -1.478651               | -3.024385 | 0.752833  |
| 4             | 6             | 0           | -2.149906               | -3.266573 | -0.629657 |
| 5             | 6             | 0           | -1.233303               | -2.584512 | -1.651879 |
| 6             | 1             | 0           | -1.977644               | -2.197244 | 1.267917  |
| 7             | 1             | 0           | -2.205355               | -4.337301 | -0.839452 |
| 8             | 1             | 0           | -3.164056               | -2.860102 | -0.650204 |
| 9             | 1             | 0           | -1.339524               | -2.998227 | -2.658158 |
| 10            | 1             | 0           | -1.390865               | -1.503455 | -1.699998 |
| 11            | 8             | 0           | 1.199585                | -2.074220 | -1.479027 |
| 12            | 8             | 0           | 0.440722                | -4.169409 | -1.202619 |
| 13            | 6             | 0           | 1.752516                | -4.599400 | -0.812485 |
| 14            | 1             | 0           | 1.742847                | -5.684425 | -0.923270 |
| 15            | 1             | 0           | 2.514565                | -4.157849 | -1.457934 |
| 16            | 1             | 0           | 1.943594                | -4.333957 | 0.230340  |
| 17            | 1             | 0           | -0.109802               | -1.396006 | 0.686367  |
| 18            | 1             | 0           | 0.934226                | -1.101339 | -1.545199 |
| 19            | 6             | 0           | 1.394439                | 4.025576  | 0.121995  |
| 20            | 6             | 0           | 1.987935                | 2.770318  | 0.037828  |
| 21            | 6             | 0           | 3.688273                | 3.668129  | -1.416558 |
| 22            | 6             | 0           | 3.035314                | 4.899112  | -1.440857 |
| 23            | 6             | 0           | 1.896634                | 5.075463  | -0.661892 |
| 24            | 1             | 0           | 4.597702                | 3.527861  | -1.992652 |
| 25            | 1             | 0           | 3.423092                | 5.709366  | -2.052786 |
| 26            | 6             | 0           | 1.036506                | 6.310376  | -0.508260 |
| 27            | 1             | 0           | 1.540500                | 7.067515  | 0.109147  |
| 28            | 1             | 0           | 0.811592                | 6.786790  | -1.469400 |
| 29            | 6             | 0           | 0.290307                | 4.541365  | 1.034514  |
| 30            | 6             | 0           | -0.224323               | 5.758055  | 0.190889  |

|    |    |   |           |           |           |
|----|----|---|-----------|-----------|-----------|
| 31 | 1  | 0 | -0.938891 | 5.397047  | -0.556476 |
| 32 | 1  | 0 | -0.737364 | 6.501447  | 0.809260  |
| 33 | 6  | 0 | 0.869328  | 5.048741  | 2.398028  |
| 34 | 1  | 0 | 1.526602  | 4.278300  | 2.815356  |
| 35 | 1  | 0 | 1.460768  | 5.962417  | 2.281068  |
| 36 | 6  | 0 | -0.370863 | 5.236582  | 3.300356  |
| 37 | 1  | 0 | -0.783372 | 6.251710  | 3.213070  |
| 38 | 1  | 0 | -0.147957 | 5.078538  | 4.361881  |
| 39 | 6  | 0 | -1.338758 | 4.207811  | 2.756508  |
| 40 | 6  | 0 | -0.878949 | 3.700454  | 1.531249  |
| 41 | 6  | 0 | -2.536132 | 3.762203  | 3.307090  |
| 42 | 1  | 0 | -2.893740 | 4.154692  | 4.255483  |
| 43 | 6  | 0 | -1.569678 | 2.652679  | 0.929448  |
| 44 | 8  | 0 | 1.391369  | 1.689133  | 0.694035  |
| 45 | 8  | 0 | -1.029558 | 2.016676  | -0.189331 |
| 46 | 15 | 0 | 0.157631  | 0.906485  | -0.033787 |
| 47 | 8  | 0 | -0.240928 | -0.172766 | 0.984185  |
| 48 | 8  | 0 | 0.478942  | 0.438740  | -1.427907 |
| 49 | 6  | 0 | 3.184030  | 2.583341  | -0.680928 |
| 50 | 6  | 0 | -2.825057 | 2.242972  | 1.419206  |
| 51 | 6  | 0 | -1.435773 | -4.225293 | 1.679214  |
| 52 | 6  | 0 | -0.333731 | -4.457958 | 2.510530  |
| 53 | 6  | 0 | -2.539063 | -5.084130 | 1.767256  |
| 54 | 6  | 0 | -0.327591 | -5.537223 | 3.395211  |
| 55 | 1  | 0 | 0.519493  | -3.789931 | 2.460182  |
| 56 | 6  | 0 | -2.536380 | -6.158644 | 2.657117  |
| 57 | 1  | 0 | -3.412005 | -4.914406 | 1.142289  |
| 58 | 6  | 0 | -1.427599 | -6.392380 | 3.471546  |
| 59 | 1  | 0 | 0.538967  | -5.706475 | 4.029250  |
| 60 | 1  | 0 | -3.401441 | -6.814358 | 2.710652  |
| 61 | 1  | 0 | -1.422782 | -7.231366 | 4.162147  |
| 62 | 6  | 0 | 3.969511  | 1.317260  | -0.606977 |
| 63 | 6  | 0 | -3.289265 | 2.815956  | 2.613982  |
| 64 | 1  | 0 | -4.246980 | 2.492313  | 3.010176  |
| 65 | 6  | 0 | -3.694287 | 1.295396  | 0.662774  |
| 66 | 6  | 0 | -5.481008 | -0.412254 | -0.790613 |
| 67 | 6  | 0 | 5.643871  | -0.997668 | -0.419065 |
| 68 | 6  | 0 | 5.167434  | -0.545044 | -1.653021 |
| 69 | 1  | 0 | 5.407834  | -1.088124 | -2.560863 |
| 70 | 6  | 0 | 4.365599  | 0.596792  | -1.757288 |
| 71 | 6  | 0 | 5.275396  | -0.278120 | 0.721363  |
| 72 | 1  | 0 | 5.660320  | -0.562741 | 1.695145  |
| 73 | 6  | 0 | 4.456769  | 0.849720  | 0.635033  |
| 74 | 6  | 0 | -5.063660 | -0.729990 | 0.506690  |
| 75 | 1  | 0 | -5.401347 | -1.649027 | 0.974462  |
| 76 | 6  | 0 | -4.208368 | 0.108360  | 1.232852  |
| 77 | 6  | 0 | -4.997295 | 0.773396  | -1.351401 |
| 78 | 1  | 0 | -5.331894 | 1.089901  | -2.333647 |
| 79 | 6  | 0 | -4.127022 | 1.608858  | -0.646714 |
| 80 | 6  | 0 | 6.539062  | -2.192426 | -0.320970 |
| 81 | 6  | 0 | 7.827408  | -2.165027 | -0.902757 |
| 82 | 6  | 0 | 6.112116  | -3.347853 | 0.368957  |
| 83 | 6  | 0 | 8.649023  | -3.290755 | -0.793191 |
| 84 | 6  | 0 | 6.964930  | -4.454373 | 0.443901  |
| 85 | 6  | 0 | 8.236356  | -4.450701 | -0.132443 |
| 86 | 1  | 0 | 9.644206  | -3.256370 | -1.232924 |
| 87 | 1  | 0 | 6.623221  | -5.343833 | 0.970412  |
| 88 | 6  | 0 | -6.439655 | -1.288453 | -1.534930 |
| 89 | 6  | 0 | -7.748025 | -1.490748 | -1.032287 |
| 90 | 6  | 0 | -6.058038 | -1.908987 | -2.744353 |
| 91 | 6  | 0 | -8.629580 | -2.314725 | -1.735789 |
| 92 | 6  | 0 | -6.972962 | -2.736192 | -3.407168 |
| 93 | 6  | 0 | -8.262959 | -2.953799 | -2.924022 |
| 94 | 1  | 0 | -9.635578 | -2.457534 | -1.345155 |
| 95 | 1  | 0 | -6.663357 | -3.222176 | -4.330463 |
| 96 | 6  | 0 | -4.689351 | -1.712330 | -3.361889 |
| 97 | 1  | 0 | -4.641535 | -0.790240 | -3.955385 |
| 98 | 1  | 0 | -3.899299 | -1.643836 | -2.609439 |
| 99 | 1  | 0 | -4.449763 | -2.540828 | -4.036346 |

|     |   |   |            |           |           |
|-----|---|---|------------|-----------|-----------|
| 100 | 6 | 0 | -8.238237  | -0.817837 | 0.233508  |
| 101 | 1 | 0 | -7.856977  | -1.308149 | 1.137916  |
| 102 | 1 | 0 | -7.927884  | 0.230779  | 0.284448  |
| 103 | 1 | 0 | -9.330999  | -0.851135 | 0.284221  |
| 104 | 6 | 0 | -9.242949  | -3.831944 | -3.666367 |
| 105 | 1 | 0 | -10.039641 | -3.235868 | -4.130245 |
| 106 | 1 | 0 | -8.749239  | -4.398560 | -4.462243 |
| 107 | 1 | 0 | -9.729090  | -4.548605 | -2.993966 |
| 108 | 6 | 0 | 4.754766   | -3.425733 | 1.034827  |
| 109 | 1 | 0 | 4.756911   | -2.941306 | 2.019813  |
| 110 | 1 | 0 | 3.977684   | -2.934296 | 0.442415  |
| 111 | 1 | 0 | 4.464591   | -4.470111 | 1.191543  |
| 112 | 6 | 0 | 8.359782   | -0.940282 | -1.617164 |
| 113 | 1 | 0 | 7.932414   | -0.831060 | -2.621653 |
| 114 | 1 | 0 | 8.130603   | -0.018838 | -1.072051 |
| 115 | 1 | 0 | 9.446226   | -1.006323 | -1.732254 |
| 116 | 6 | 0 | 9.130262   | -5.666763 | -0.062602 |
| 117 | 1 | 0 | 10.186723  | -5.384560 | 0.004150  |
| 118 | 1 | 0 | 8.891054   | -6.291215 | 0.804666  |
| 119 | 1 | 0 | 9.019343   | -6.294634 | -0.956997 |
| 120 | 7 | 0 | -3.911490  | -0.273571 | 2.571323  |
| 121 | 6 | 0 | -4.874315  | -0.673727 | 3.487883  |
| 122 | 6 | 0 | -2.663812  | -0.370964 | 3.169366  |
| 123 | 6 | 0 | -4.241187  | -1.015537 | 4.658457  |
| 124 | 1 | 0 | -5.921735  | -0.643798 | 3.225713  |
| 125 | 6 | 0 | -2.842344  | -0.830755 | 4.453122  |
| 126 | 1 | 0 | -1.769267  | -0.113482 | 2.622117  |
| 127 | 1 | 0 | -4.727788  | -1.354026 | 5.563484  |
| 128 | 1 | 0 | -2.051238  | -1.015952 | 5.167239  |
| 129 | 7 | 0 | -3.749484  | 2.828363  | -1.279935 |
| 130 | 6 | 0 | -3.169519  | 2.923120  | -2.533240 |
| 131 | 6 | 0 | -4.059236  | 4.103703  | -0.837861 |
| 132 | 6 | 0 | -3.095655  | 4.251990  | -2.876320 |
| 133 | 1 | 0 | -2.815460  | 2.035466  | -3.035998 |
| 134 | 6 | 0 | -3.665547  | 5.000906  | -1.802822 |
| 135 | 1 | 0 | -4.544048  | 4.249242  | 0.115454  |
| 136 | 1 | 0 | -2.666427  | 4.645021  | -3.788118 |
| 137 | 1 | 0 | -3.781287  | 6.075291  | -1.748548 |
| 138 | 7 | 0 | 4.011394   | 1.019481  | -3.069288 |
| 139 | 6 | 0 | 4.934578   | 1.197168  | -4.091222 |
| 140 | 6 | 0 | 2.744549   | 1.280163  | -3.563890 |
| 141 | 6 | 0 | 4.255094   | 1.577565  | -5.223595 |
| 142 | 1 | 0 | 5.989798   | 1.066123  | -3.900394 |
| 143 | 6 | 0 | 2.869097   | 1.623031  | -4.889883 |
| 144 | 1 | 0 | 1.875637   | 1.169755  | -2.932193 |
| 145 | 1 | 0 | 4.703061   | 1.803408  | -6.182340 |
| 146 | 1 | 0 | 2.050354   | 1.873794  | -5.551228 |
| 147 | 7 | 0 | 4.191635   | 1.549633  | 1.849716  |
| 148 | 6 | 0 | 3.631476   | 0.981906  | 2.980109  |
| 149 | 6 | 0 | 4.597809   | 2.836901  | 2.156141  |
| 150 | 6 | 0 | 3.665798   | 1.909958  | 3.993915  |
| 151 | 1 | 0 | 3.216795   | -0.014202 | 2.936902  |
| 152 | 6 | 0 | 4.283934   | 3.085882  | 3.472124  |
| 153 | 1 | 0 | 5.084070   | 3.448927  | 1.411766  |
| 154 | 1 | 0 | 3.279562   | 1.766956  | 4.994231  |
| 155 | 1 | 0 | 4.484396   | 4.006539  | 4.004059  |

TS-2nd-(S)-reaction pathway: S-si/(S)-1bh (SPINOL)

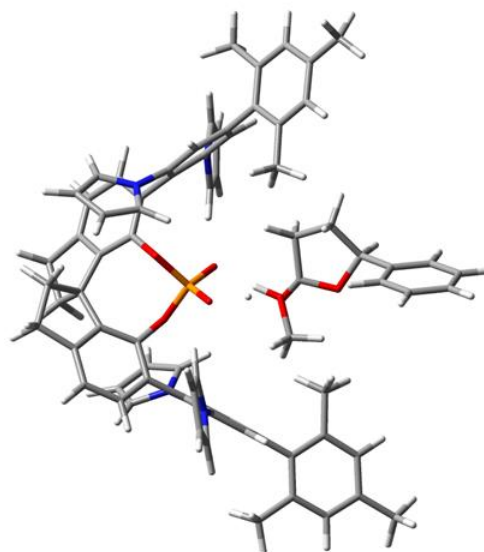

B3LYP/6-31G(d); E(B3LYP) = -3948.43571002 hartree

Zero-point Energy Correction = 1.264691 hartree

Thermal Correction to Energy = 1.340901 hartree

Thermal correction to Enthalpy = 1.341845 hartree

Thermal correction to Gibbs Free Energy = 1.144248 hartree

Sum of electronic and Zero-point Energies = -3947.171019 hartree

Sum of electronic and thermal Energies = -3947.094809 hartree

Sum of electronic and thermal Enthalpies = -3947.093865 hartree

Sum of electronic and thermal Free Energies = -3947.291462 hartree

The number of Imaginary frequencies = 1

| Center Number | Atomic Number | Atomic Type | Coordinates (Angstroms) |           |           |
|---------------|---------------|-------------|-------------------------|-----------|-----------|
|               |               |             | X                       | Y         | Z         |
| 1             | 6             | 0           | -1.063672               | -4.280405 | -0.530642 |
| 2             | 6             | 0           | -1.721047               | -3.067261 | -0.354809 |
| 3             | 6             | 0           | -3.395136               | -3.731224 | -1.958426 |
| 4             | 6             | 0           | -2.675194               | -4.891075 | -2.243204 |
| 5             | 6             | 0           | -1.517589               | -5.164544 | -1.521501 |
| 6             | 1             | 0           | -4.319338               | -3.525013 | -2.489448 |
| 7             | 1             | 0           | -3.025712               | -5.573802 | -3.012892 |
| 8             | 6             | 0           | -0.582507               | -6.348550 | -1.641703 |
| 9             | 1             | 0           | -1.033783               | -7.254245 | -1.212114 |
| 10            | 1             | 0           | -0.338184               | -6.583142 | -2.684156 |
| 11            | 6             | 0           | 0.071581                | -4.923963 | 0.257275  |
| 12            | 6             | 0           | 0.650462                | -5.890881 | -0.830722 |
| 13            | 1             | 0           | 1.337419                | -5.331171 | -1.474697 |
| 14            | 1             | 0           | 1.210146                | -6.722384 | -0.390362 |
| 15            | 6             | 0           | -0.484431               | -5.754796 | 1.464219  |
| 16            | 1             | 0           | -1.193069               | -5.136894 | 2.026213  |
| 17            | 1             | 0           | -1.014895               | -6.654438 | 1.136408  |
| 18            | 6             | 0           | 0.756069                | -6.060159 | 2.332829  |
| 19            | 1             | 0           | 1.239719                | -6.998965 | 2.027573  |
| 20            | 1             | 0           | 0.511504                | -6.163796 | 3.396270  |
| 21            | 6             | 0           | 1.653243                | -4.873029 | 2.058976  |
| 22            | 6             | 0           | 1.184462                | -4.148839 | 0.952559  |
| 23            | 6             | 0           | 2.796421                | -4.468585 | 2.741587  |
| 24            | 1             | 0           | 3.159971                | -5.028358 | 3.599453  |
| 25            | 6             | 0           | 1.813860                | -2.956846 | 0.607244  |
| 26            | 6             | 0           | 3.484606                | -3.337758 | 2.303580  |
| 27            | 1             | 0           | 4.396162                | -3.031363 | 2.807549  |
| 28            | 8             | 0           | -1.171866               | -2.104321 | 0.493032  |
| 29            | 8             | 0           | 1.265978                | -2.161411 | -0.395307 |
| 30            | 15            | 0           | 0.024686                | -1.147643 | -0.075661 |

|    |   |   |           |           |           |     |   |   |           |           |           |
|----|---|---|-----------|-----------|-----------|-----|---|---|-----------|-----------|-----------|
| 31 | 8 | 0 | 0.351819  | -0.220521 | 1.093385  | 100 | 6 | 0 | -8.171256 | 0.822204  | -1.124055 |
| 32 | 8 | 0 | -0.319262 | -0.493433 | -1.390634 | 101 | 1 | 0 | -7.762052 | 0.929572  | -2.136269 |
| 33 | 6 | 0 | -2.935479 | -2.798416 | -1.015881 | 102 | 1 | 0 | -7.938062 | -0.194778 | -0.792655 |
| 34 | 6 | 0 | 3.011008  | -2.560431 | 1.234516  | 103 | 1 | 0 | -9.259105 | 0.912793  | -1.203402 |
| 35 | 6 | 0 | -3.762260 | -1.603783 | -0.674792 | 104 | 6 | 0 | -8.912117 | 5.091413  | 1.436586  |
| 36 | 6 | 0 | -5.050882 | -0.331750 | 0.982759  | 105 | 1 | 0 | -9.619423 | 4.800974  | 2.224988  |
| 37 | 6 | 0 | -4.993004 | 0.425007  | -1.284328 | 106 | 1 | 0 | -8.339784 | 5.946345  | 1.811444  |
| 38 | 6 | 0 | -5.441207 | 0.611184  | 0.027423  | 107 | 1 | 0 | -9.505834 | 5.430110  | 0.580266  |
| 39 | 1 | 0 | -5.416467 | -0.260924 | 2.001859  | 108 | 6 | 0 | 4.302764  | 2.962461  | -1.909661 |
| 40 | 1 | 0 | -5.259478 | 1.139635  | -2.056184 | 109 | 1 | 0 | 3.874610  | 1.979242  | -2.118445 |
| 41 | 6 | 0 | 3.805444  | -1.395712 | 0.743618  | 110 | 1 | 0 | 3.698121  | 3.400317  | -1.105292 |
| 42 | 6 | 0 | 4.968912  | 0.731789  | 1.107299  | 111 | 1 | 0 | 4.156576  | 3.589910  | -2.794533 |
| 43 | 6 | 0 | 5.065215  | -0.293513 | -1.051494 | 112 | 6 | 0 | 8.269977  | 0.798281  | 0.484426  |
| 44 | 6 | 0 | 5.417680  | 0.769567  | -0.215610 | 113 | 1 | 0 | 7.885433  | 0.818303  | 1.511402  |
| 45 | 1 | 0 | 5.215081  | 1.541914  | 1.786662  | 114 | 1 | 0 | 8.047929  | -0.198161 | 0.085803  |
| 46 | 1 | 0 | 5.433908  | -0.327388 | -2.071713 | 115 | 1 | 0 | 9.357572  | 0.907590  | 0.536263  |
| 47 | 6 | 0 | 0.117556  | 2.598747  | -0.865114 | 116 | 6 | 0 | 8.877185  | 5.057580  | -2.142153 |
| 48 | 8 | 0 | 0.502931  | 3.898227  | -0.945800 | 117 | 1 | 0 | 8.464372  | 5.546934  | -3.030455 |
| 49 | 8 | 0 | 0.349571  | 2.212655  | 0.747388  | 118 | 1 | 0 | 9.004714  | 5.830839  | -1.372558 |
| 50 | 1 | 0 | 0.491904  | 0.880652  | -1.614120 | 119 | 1 | 0 | 9.877020  | 4.686424  | -2.393798 |
| 51 | 6 | 0 | -0.662664 | 4.792599  | -0.960358 | 120 | 7 | 0 | -3.857815 | -0.794596 | -3.019363 |
| 52 | 6 | 0 | -1.842180 | 3.898865  | -0.537940 | 121 | 6 | 0 | -4.801068 | -0.778297 | -4.038200 |
| 53 | 6 | 0 | -1.398458 | 2.511914  | -1.008987 | 122 | 6 | 0 | -2.595929 | -0.898410 | -3.580818 |
| 54 | 1 | 0 | -0.780216 | 5.100440  | -2.005951 | 123 | 6 | 0 | -4.139001 | -0.881307 | -5.238267 |
| 55 | 1 | 0 | -1.964467 | 3.915764  | 0.547991  | 124 | 1 | 0 | -5.854509 | -0.728475 | -3.803891 |
| 56 | 1 | 0 | -2.780245 | 4.232379  | -0.989186 | 125 | 6 | 0 | -2.744334 | -0.950403 | -4.947432 |
| 57 | 1 | 0 | -1.831851 | 1.678357  | -0.456395 | 126 | 1 | 0 | -1.716819 | -0.902219 | -2.952793 |
| 58 | 1 | 0 | -1.611416 | 2.352676  | -2.071817 | 127 | 1 | 0 | -4.603919 | -0.911698 | -6.214899 |
| 59 | 8 | 0 | 0.914238  | 1.800921  | -1.567474 | 128 | 1 | 0 | -1.935611 | -1.027077 | -5.662073 |
| 60 | 6 | 0 | 1.666963  | 2.564679  | 1.241678  | 129 | 7 | 0 | -3.945046 | -2.350912 | 1.679232  |
| 61 | 1 | 0 | 1.745581  | 2.150476  | 2.248477  | 130 | 6 | 0 | -3.390665 | -2.028898 | 2.905673  |
| 62 | 1 | 0 | 2.437069  | 2.134150  | 0.598765  | 131 | 6 | 0 | -4.318479 | -3.683854 | 1.698668  |
| 63 | 1 | 0 | 1.744997  | 3.650396  | 1.260352  | 132 | 6 | 0 | -3.396842 | -3.155679 | 3.692967  |
| 64 | 6 | 0 | -0.403018 | 6.014474  | -0.113500 | 133 | 1 | 0 | -2.994552 | -1.039173 | 3.077665  |
| 65 | 6 | 0 | -0.209577 | 5.913722  | 1.271883  | 134 | 6 | 0 | -3.990888 | -4.204830 | 2.928616  |
| 66 | 6 | 0 | -0.365272 | 7.278556  | -0.710480 | 135 | 1 | 0 | -4.794587 | -4.131092 | 0.839410  |
| 67 | 6 | 0 | 0.019236  | 7.054224  | 2.039099  | 136 | 1 | 0 | -3.006022 | -3.224695 | 4.699286  |
| 68 | 1 | 0 | -0.236788 | 4.938830  | 1.750778  | 137 | 1 | 0 | -4.166016 | -5.223666 | 3.247953  |
| 69 | 6 | 0 | -0.145671 | 8.424180  | 0.057191  | 138 | 7 | 0 | 3.814044  | -0.283319 | 2.960565  |
| 70 | 1 | 0 | -0.507204 | 7.367577  | -1.785129 | 139 | 6 | 0 | 4.709029  | -0.062805 | 3.997134  |
| 71 | 6 | 0 | 0.049262  | 8.313612  | 1.433525  | 140 | 6 | 0 | 2.534458  | -0.361130 | 3.486691  |
| 72 | 1 | 0 | 0.171312  | 6.961709  | 3.111072  | 141 | 6 | 0 | 4.001668  | -0.011050 | 5.174844  |
| 73 | 1 | 0 | -0.121748 | 9.399096  | -0.421897 | 142 | 1 | 0 | 5.768058  | 0.008557  | 3.796203  |
| 74 | 1 | 0 | 0.224661  | 9.202451  | 2.033391  | 143 | 6 | 0 | 2.625134  | -0.193197 | 4.849638  |
| 75 | 1 | 0 | 0.275052  | 1.118982  | 0.872033  | 144 | 1 | 0 | 1.684596  | -0.514983 | 2.837876  |
| 76 | 6 | 0 | -6.328658 | 1.760013  | 0.391239  | 145 | 1 | 0 | 4.425575  | 0.132707  | 6.159877  |
| 77 | 6 | 0 | -8.006442 | 3.941395  | 1.062650  | 146 | 1 | 0 | 1.791281  | -0.204186 | 5.538998  |
| 78 | 6 | 0 | 6.291144  | 1.882078  | -0.711736 | 147 | 7 | 0 | 4.042244  | -2.424395 | -1.497274 |
| 79 | 6 | 0 | 7.978827  | 3.943550  | -1.657190 | 148 | 6 | 0 | 3.541796  | -2.270892 | -2.778848 |
| 80 | 6 | 0 | 4.284437  | -1.355914 | -0.587373 | 149 | 6 | 0 | 4.412541  | -3.747442 | -1.322982 |
| 81 | 6 | 0 | 4.187630  | -0.327375 | 1.586276  | 150 | 6 | 0 | 3.578490  | -3.492316 | -3.407454 |
| 82 | 6 | 0 | -4.233062 | -1.412868 | 0.645226  | 151 | 1 | 0 | 3.159548  | -1.313590 | -3.100653 |
| 83 | 6 | 0 | -4.189254 | -0.664219 | -1.641261 | 152 | 6 | 0 | 4.136877  | -4.428387 | -2.485467 |
| 84 | 6 | 0 | 6.624245  | 3.910736  | -1.990254 | 153 | 1 | 0 | 4.852487  | -4.075003 | -0.393538 |
| 85 | 1 | 0 | 6.215473  | 4.692537  | -2.627799 | 154 | 1 | 0 | 3.230385  | -3.695975 | -4.411170 |
| 86 | 6 | 0 | 5.766960  | 2.901826  | -1.533249 | 155 | 1 | 0 | 4.324451  | -5.479832 | -2.658665 |
| 87 | 6 | 0 | 7.662353  | 1.890843  | -0.369138 |     |   |   |           |           |           |
| 88 | 6 | 0 | 8.478352  | 2.919051  | -0.847470 |     |   |   |           |           |           |
| 89 | 1 | 0 | 9.535563  | 2.913184  | -0.588190 |     |   |   |           |           |           |
| 90 | 6 | 0 | -7.622117 | 1.864604  | -0.172133 |     |   |   |           |           |           |
| 91 | 6 | 0 | -8.432150 | 2.949358  | 0.175324  |     |   |   |           |           |           |
| 92 | 1 | 0 | -9.428211 | 3.017694  | -0.258476 |     |   |   |           |           |           |
| 93 | 6 | 0 | -6.729229 | 3.818457  | 1.611437  |     |   |   |           |           |           |
| 94 | 1 | 0 | -6.372915 | 4.580118  | 2.302707  |     |   |   |           |           |           |
| 95 | 6 | 0 | -5.886987 | 2.744413  | 1.302508  |     |   |   |           |           |           |
| 96 | 6 | 0 | -4.525364 | 2.680367  | 1.961778  |     |   |   |           |           |           |
| 97 | 1 | 0 | -4.527906 | 2.017052  | 2.836201  |     |   |   |           |           |           |
| 98 | 1 | 0 | -3.755648 | 2.302166  | 1.283041  |     |   |   |           |           |           |
| 99 | 1 | 0 | -4.220485 | 3.672172  | 2.311617  |     |   |   |           |           |           |

TS-1st-(S)-reaction pathway: S-syn/(S)-1bh (SPINOL)

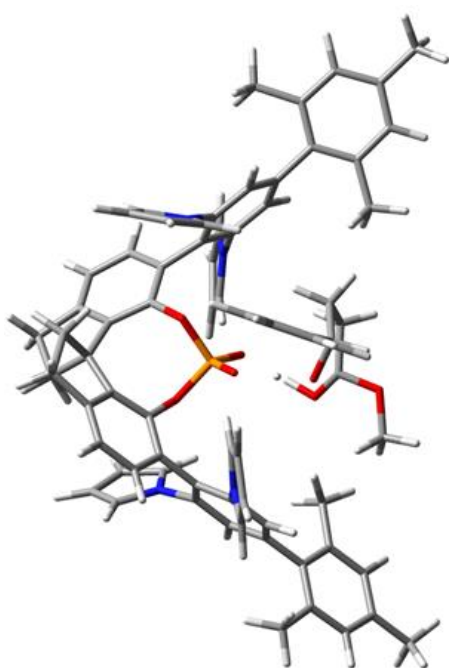

B3LYP/6-31G(d); E(B3LYP) = -3948.43382924 hartree  
 Zero-point Energy Correction = 1.264092 hartree  
 Thermal Correction to Energy = 1.340269 hartree  
 Thermal correction to Enthalpy = 1.341213 hartree  
 Thermal correction to Gibbs Free Energy = 1.144816 hartree  
 Sum of electronic and Zero-point Energies = -3947.169737 hartree  
 Sum of electronic and thermal Energies = -3947.093560 hartree  
 Sum of electronic and thermal Enthalpies = -3947.092616 hartree  
 Sum of electronic and thermal Free Energies = -3947.289013 hartree  
 The number of Imaginary frequencies = 1

|    |    |   |           |           |           |
|----|----|---|-----------|-----------|-----------|
| 28 | 15 | 0 | -0.121630 | 0.695067  | -0.089153 |
| 29 | 8  | 0 | 0.211782  | -0.199943 | -1.256452 |
| 30 | 8  | 0 | -0.549229 | 0.017989  | 1.212729  |
| 31 | 6  | 0 | -3.142588 | 2.194821  | 0.898593  |
| 32 | 6  | 0 | 2.835221  | 2.281341  | -1.246012 |
| 33 | 6  | 0 | -3.919762 | 1.058641  | 0.324383  |
| 34 | 6  | 0 | 3.299774  | 3.233335  | -2.169463 |
| 35 | 1  | 0 | 4.190000  | 3.005683  | -2.747029 |
| 36 | 6  | 0 | 3.656779  | 1.049867  | -1.038118 |
| 37 | 6  | 0 | -0.382550 | -3.154648 | 0.079331  |
| 38 | 8  | 0 | -0.689585 | -2.397096 | 1.516490  |
| 39 | 6  | 0 | 0.381761  | -2.887543 | 2.396934  |
| 40 | 6  | 0 | 1.155510  | -3.169058 | 0.087818  |
| 41 | 1  | 0 | 1.473254  | -4.170274 | -0.211955 |
| 42 | 1  | 0 | 1.519291  | -2.454267 | -0.652530 |
| 43 | 8  | 0 | -1.036481 | -2.471226 | -0.859409 |
| 44 | 8  | 0 | -0.865107 | -4.405792 | 0.273501  |
| 45 | 6  | 0 | -2.296356 | -4.557968 | 0.225080  |
| 46 | 1  | 0 | -2.491946 | -5.560463 | 0.608163  |
| 47 | 1  | 0 | -2.657242 | -4.470427 | -0.801529 |
| 48 | 1  | 0 | -2.783221 | -3.810113 | 0.856458  |
| 49 | 1  | 0 | -0.638253 | -1.283401 | 1.360296  |
| 50 | 1  | 0 | -0.550654 | -1.619396 | -1.108440 |
| 51 | 6  | 0 | 0.422015  | -2.191175 | 3.735578  |
| 52 | 6  | 0 | 0.825740  | -0.855345 | 3.881204  |
| 53 | 6  | 0 | 0.076916  | -2.922134 | 4.879770  |
| 54 | 6  | 0 | 0.877693  | -0.271488 | 5.146652  |
| 55 | 1  | 0 | 1.071376  | -0.254638 | 3.012673  |
| 56 | 6  | 0 | 0.135827  | -2.340207 | 6.146106  |
| 57 | 1  | 0 | -0.240595 | -3.957333 | 4.777739  |
| 58 | 6  | 0 | 0.537415  | -1.010756 | 6.281867  |
| 59 | 1  | 0 | 1.186692  | 0.765914  | 5.239089  |
| 60 | 1  | 0 | -0.133547 | -2.923723 | 7.022217  |
| 61 | 1  | 0 | 0.584906  | -0.552696 | 7.266295  |
| 62 | 1  | 0 | 0.121428  | -3.936903 | 2.555638  |
| 63 | 6  | 0 | 1.631931  | -2.801438 | 1.511399  |
| 64 | 1  | 0 | 2.416529  | -3.467059 | 1.882200  |
| 65 | 1  | 0 | 2.028500  | -1.782100 | 1.525304  |
| 66 | 6  | 0 | -5.372991 | -1.109572 | -0.855087 |
| 67 | 6  | 0 | 5.525261  | -1.101436 | -0.741949 |
| 68 | 6  | 0 | -4.394302 | -0.021829 | 1.103782  |
| 69 | 6  | 0 | -5.083615 | -1.086877 | 0.512658  |
| 70 | 1  | 0 | -5.380875 | -1.917915 | 1.143691  |
| 71 | 6  | 0 | -4.961187 | -0.015739 | -1.621320 |
| 72 | 1  | 0 | -5.219196 | 0.042835  | -2.673422 |
| 73 | 6  | 0 | -4.253037 | 1.043213  | -1.050193 |
| 74 | 6  | 0 | 4.901067  | -0.851428 | -1.966749 |
| 75 | 1  | 0 | 5.127927  | -1.468855 | -2.830029 |
| 76 | 6  | 0 | 3.991882  | 0.200625  | -2.120152 |
| 77 | 6  | 0 | 5.186225  | -0.284641 | 0.339749  |
| 78 | 1  | 0 | 5.673102  | -0.428016 | 1.299014  |
| 79 | 6  | 0 | 4.279413  | 0.773632  | 0.202007  |
| 80 | 6  | 0 | -6.113418 | -2.252569 | -1.474386 |
| 81 | 6  | 0 | -7.443996 | -2.532600 | -1.087339 |
| 82 | 6  | 0 | -5.487329 | -3.058067 | -2.452759 |
| 83 | 6  | 0 | -8.112711 | -3.611812 | -1.673263 |
| 84 | 6  | 0 | -6.194013 | -4.133287 | -3.002569 |
| 85 | 6  | 0 | -7.507335 | -4.428222 | -2.631343 |
| 86 | 1  | 0 | -9.139187 | -3.816198 | -1.373844 |
| 87 | 1  | 0 | -5.699970 | -4.757290 | -3.745238 |
| 88 | 6  | 0 | 6.574420  | -2.164343 | -0.612099 |
| 89 | 6  | 0 | 7.936008  | -1.794875 | -0.550729 |
| 90 | 6  | 0 | 6.218178  | -3.527744 | -0.562589 |
| 91 | 6  | 0 | 8.907693  | -2.794028 | -0.435046 |
| 92 | 6  | 0 | 7.222643  | -4.493354 | -0.442062 |
| 93 | 6  | 0 | 8.575047  | -4.149813 | -0.379710 |
| 94 | 1  | 0 | 9.955235  | -2.501900 | -0.389706 |
| 95 | 1  | 0 | 6.937623  | -5.542798 | -0.394507 |
| 96 | 6  | 0 | 8.368124  | -0.345937 | -0.622464 |

| Center Number | Atomic Number | Atomic Type | Coordinates (Angstroms) |          |           |
|---------------|---------------|-------------|-------------------------|----------|-----------|
|               |               |             | X                       | Y        | Z         |
| 1             | 6             | 0           | -1.237349               | 3.707370 | 0.788966  |
| 2             | 6             | 0           | -1.887260               | 2.553392 | 0.369916  |
| 3             | 6             | 0           | -3.656879               | 2.967856 | 1.951442  |
| 4             | 6             | 0           | -2.946002               | 4.047338 | 2.477662  |
| 5             | 6             | 0           | -1.739423               | 4.415923 | 1.890522  |
| 6             | 1             | 0           | -4.614899               | 2.692293 | 2.381371  |
| 7             | 1             | 0           | -3.341523               | 4.593935 | 3.329859  |
| 8             | 6             | 0           | -0.795486               | 5.539509 | 2.265896  |
| 9             | 1             | 0           | -1.214929               | 6.518534 | 1.995109  |
| 10            | 1             | 0           | -0.593925               | 5.572247 | 3.342904  |
| 11            | 6             | 0           | -0.073136               | 4.468868 | 0.172201  |
| 12            | 6             | 0           | 0.469326                | 5.217842 | 1.434268  |
| 13            | 1             | 0           | 1.128391                | 4.543777 | 1.992655  |
| 14            | 1             | 0           | 1.049138                | 6.108456 | 1.170927  |
| 15            | 6             | 0           | -0.612464               | 5.508475 | -0.870825 |
| 16            | 1             | 0           | -1.316872               | 5.003585 | -1.540631 |
| 17            | 1             | 0           | -1.144201               | 6.336775 | -0.392131 |
| 18            | 6             | 0           | 0.633769                | 5.956668 | -1.659388 |
| 19            | 1             | 0           | 1.128155                | 6.814339 | -1.180834 |
| 20            | 1             | 0           | 0.399157                | 6.260514 | -2.685958 |
| 21            | 6             | 0           | 1.511193                | 4.726929 | -1.607810 |
| 22            | 6             | 0           | 1.045520                | 3.822189 | -0.640698 |
| 23            | 6             | 0           | 2.632820                | 4.437152 | -2.376580 |
| 24            | 1             | 0           | 2.990575                | 5.137753 | -3.126508 |
| 25            | 6             | 0           | 1.667291                | 2.579538 | -0.517204 |
| 26            | 8             | 0           | -1.277077               | 1.736215 | -0.585952 |
| 27            | 8             | 0           | 1.138014                | 1.634680 | 0.363199  |

|     |   |   |           |           |           |
|-----|---|---|-----------|-----------|-----------|
| 97  | 1 | 0 | 7.922856  | 0.165855  | -1.483166 |
| 98  | 1 | 0 | 8.067166  | 0.218749  | 0.267812  |
| 99  | 1 | 0 | 9.456366  | -0.271217 | -0.709854 |
| 100 | 6 | 0 | 4.771722  | -3.963952 | -0.626064 |
| 101 | 1 | 0 | 4.157810  | -3.417895 | 0.097963  |
| 102 | 1 | 0 | 4.331699  | -3.780144 | -1.613728 |
| 103 | 1 | 0 | 4.678211  | -5.034061 | -0.415559 |
| 104 | 6 | 0 | 9.645993  | -5.211432 | -0.284013 |
| 105 | 1 | 0 | 9.277913  | -6.107518 | 0.226994  |
| 106 | 1 | 0 | 9.987913  | -5.523028 | -1.280207 |
| 107 | 1 | 0 | 10.524107 | -4.847468 | 0.260157  |
| 108 | 6 | 0 | -4.071896 | -2.800544 | -2.926864 |
| 109 | 1 | 0 | -4.031832 | -1.977048 | -3.651274 |
| 110 | 1 | 0 | -3.393683 | -2.535383 | -2.110819 |
| 111 | 1 | 0 | -3.670360 | -3.686398 | -3.430057 |
| 112 | 6 | 0 | -8.181359 | -1.684823 | -0.071308 |
| 113 | 1 | 0 | -7.886158 | -1.923161 | 0.958411  |
| 114 | 1 | 0 | -7.991724 | -0.616695 | -0.217619 |
| 115 | 1 | 0 | -9.260579 | -1.852107 | -0.145183 |
| 116 | 6 | 0 | -8.260864 | -5.572454 | -3.268491 |
| 117 | 1 | 0 | -8.829463 | -5.235211 | -4.145651 |
| 118 | 1 | 0 | -7.580676 | -6.361219 | -3.607268 |
| 119 | 1 | 0 | -8.977864 | -6.019247 | -2.571071 |
| 120 | 7 | 0 | 4.073505  | 1.593438  | 1.350106  |
| 121 | 6 | 0 | 3.836911  | 1.106098  | 2.624980  |
| 122 | 6 | 0 | 4.239408  | 2.966105  | 1.430790  |
| 123 | 6 | 0 | 3.832116  | 2.163903  | 3.502793  |
| 124 | 1 | 0 | 3.669988  | 0.051554  | 2.784739  |
| 125 | 6 | 0 | 4.092612  | 3.343963  | 2.744968  |
| 126 | 1 | 0 | 4.466140  | 3.544333  | 0.549004  |
| 127 | 1 | 0 | 3.659333  | 2.098608  | 4.568731  |
| 128 | 1 | 0 | 4.175308  | 4.354810  | 3.121504  |
| 129 | 7 | 0 | 3.462824  | 0.409768  | -3.423671 |
| 130 | 6 | 0 | 4.242642  | 0.525927  | -4.566515 |
| 131 | 6 | 0 | 2.127892  | 0.486033  | -3.783758 |
| 132 | 6 | 0 | 3.403694  | 0.686876  | -5.643187 |
| 133 | 1 | 0 | 5.320501  | 0.513896  | -4.494332 |
| 134 | 6 | 0 | 2.066554  | 0.654355  | -5.147265 |
| 135 | 1 | 0 | 1.353999  | 0.375205  | -3.037771 |
| 136 | 1 | 0 | 3.714800  | 0.818413  | -6.671173 |
| 137 | 1 | 0 | 1.157352  | 0.737383  | -5.727724 |
| 138 | 7 | 0 | -3.930049 | 2.139969  | -1.901229 |
| 139 | 6 | 0 | -3.266196 | 2.036365  | -3.110880 |
| 140 | 6 | 0 | -4.361565 | 3.446079  | -1.743659 |
| 141 | 6 | 0 | -3.262281 | 3.273530  | -3.710032 |
| 142 | 1 | 0 | -2.811453 | 1.100835  | -3.400630 |
| 143 | 6 | 0 | -3.962493 | 4.167511  | -2.844533 |
| 144 | 1 | 0 | -4.926896 | 3.733124  | -0.870113 |
| 145 | 1 | 0 | -2.797500 | 3.514782  | -4.656586 |
| 146 | 1 | 0 | -4.160468 | 5.217482  | -3.015273 |
| 147 | 7 | 0 | -4.231036 | -0.070063 | 2.517575  |
| 148 | 6 | 0 | -5.278539 | -0.312215 | 3.396725  |
| 149 | 6 | 0 | -3.059323 | 0.044168  | 3.246384  |
| 150 | 6 | 0 | -4.771563 | -0.341265 | 4.673882  |
| 151 | 1 | 0 | -6.288776 | -0.406316 | 3.026057  |
| 152 | 6 | 0 | -3.365534 | -0.121641 | 4.576552  |
| 153 | 1 | 0 | -2.120076 | 0.221762  | 2.747280  |
| 154 | 1 | 0 | -5.347016 | -0.495190 | 5.577276  |
| 155 | 1 | 0 | -2.651195 | -0.097859 | 5.388475  |

**TS-2nd-(S)-reaction pathway: S-re/(S)-1bh (SPINOL)**

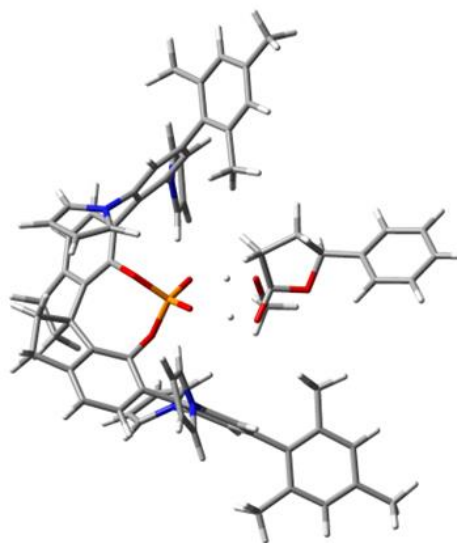

B3LYP/6-31G(d); E(B3LYP) = -3948.43553729 hartree

Zero-point Energy Correction = 1.264091 hartree

Thermal Correction to Energy = 1.340892 hartree

Thermal correction to Enthalpy = 1.341836 hartree

Thermal correction to Gibbs Free Energy = 1.140903 hartree

Sum of electronic and Zero-point Energies = -3947.171446 hartree

Sum of electronic and thermal Energies = -3947.094645 hartree

Sum of electronic and thermal Enthalpies = -3947.093701 hartree

Sum of electronic and thermal Free Energies = -3947.294634 hartree

The number of Imaginary frequencies = 1

| Center Number | Atomic Number | Atomic Type | Coordinates (Angstroms) |           |           |
|---------------|---------------|-------------|-------------------------|-----------|-----------|
|               |               |             | X                       | Y         | Z         |
| 1             | 6             | 0           | 0.488353                | 2.598641  | -0.204460 |
| 2             | 8             | 0           | 0.910208                | 3.840186  | -0.528238 |
| 3             | 8             | 0           | 0.136250                | 1.912719  | -1.754893 |
| 4             | 6             | 0           | -0.249547               | 4.713803  | -0.672480 |
| 5             | 6             | 0           | -1.227717               | 4.164164  | 0.384942  |
| 6             | 6             | 0           | -0.920297               | 2.654264  | 0.403701  |
| 7             | 1             | 0           | -0.656756               | 4.558874  | -1.678894 |
| 8             | 1             | 0           | -1.003113               | 4.619268  | 1.354554  |
| 9             | 1             | 0           | -2.266361               | 4.393388  | 0.134964  |
| 10            | 1             | 0           | -0.897950               | 2.225378  | 1.407547  |
| 11            | 1             | 0           | -1.625994               | 2.074310  | -0.193443 |
| 12            | 8             | 0           | 1.449036                | 1.870450  | 0.320737  |
| 13            | 6             | 0           | 1.270825                | 1.871198  | -2.642510 |
| 14            | 1             | 0           | 2.090378                | 1.304067  | -2.192545 |
| 15            | 1             | 0           | 0.939906                | 1.394342  | -3.567675 |
| 16            | 1             | 0           | 1.585218                | 2.896956  | -2.835557 |
| 17            | 1             | 0           | 1.067764                | 0.993867  | 0.689554  |
| 18            | 1             | 0           | -0.170777               | 0.893838  | -1.579319 |
| 19            | 6             | 0           | -1.354374               | -4.172537 | -0.846413 |
| 20            | 6             | 0           | -1.940126               | -2.956758 | -0.507464 |
| 21            | 6             | 0           | -3.710937               | -3.364339 | -2.093802 |
| 22            | 6             | 0           | -3.065242               | -4.518539 | -2.535187 |
| 23            | 6             | 0           | -1.891486               | -4.920005 | -1.905682 |
| 24            | 1             | 0           | -4.644526               | -3.058231 | -2.555862 |
| 25            | 1             | 0           | -3.483665               | -5.096224 | -3.353322 |
| 26            | 6             | 0           | -1.020975               | -6.123124 | -2.198797 |
| 27            | 1             | 0           | -1.499269               | -7.051303 | -1.855565 |
| 28            | 1             | 0           | -0.827879               | -6.246942 | -3.270634 |
| 29            | 6             | 0           | -0.227843               | -4.955260 | -0.183594 |



|    |    |   |           |           |           |     |   |   |           |           |           |
|----|----|---|-----------|-----------|-----------|-----|---|---|-----------|-----------|-----------|
| 30 | 6  | 0 | 0.262855  | -5.818597 | -1.393713 | 93  | 6 | 0 | 8.724834  | 2.416390  | -0.125059 |
| 31 | 1  | 0 | 0.955671  | -5.222681 | -1.998257 | 94  | 1 | 0 | 9.779405  | 2.229786  | 0.069975  |
| 32 | 1  | 0 | 0.793483  | -6.719703 | -1.069928 | 95  | 6 | 0 | 7.804919  | 1.390616  | 0.109368  |
| 33 | 6  | 0 | -0.796302 | -5.888873 | 0.940152  | 96  | 6 | 0 | 8.292820  | 0.054099  | 0.625071  |
| 34 | 1  | 0 | -1.458849 | -5.303075 | 1.586577  | 97  | 1 | 0 | 7.881632  | -0.173735 | 1.615868  |
| 35 | 1  | 0 | -1.379904 | -6.720087 | 0.531627  | 98  | 1 | 0 | 7.993886  | -0.769256 | -0.034009 |
| 36 | 6  | 0 | 0.445342  | -6.347442 | 1.734162  | 99  | 1 | 0 | 9.384103  | 0.043470  | 0.705330  |
| 37 | 1  | 0 | 0.876450  | -7.267051 | 1.313191  | 100 | 6 | 0 | 4.558883  | 3.166200  | -0.912065 |
| 38 | 1  | 0 | 0.220045  | -6.558468 | 2.785868  | 101 | 1 | 0 | 4.244969  | 2.673580  | -1.841934 |
| 39 | 6  | 0 | 1.390726  | -5.178322 | 1.569769  | 102 | 1 | 0 | 3.890268  | 2.803636  | -0.126497 |
| 40 | 6  | 0 | 0.940770  | -4.317323 | 0.557841  | 103 | 1 | 0 | 4.386419  | 4.239741  | -1.037808 |
| 41 | 6  | 0 | 2.556429  | -4.899082 | 2.274965  | 104 | 6 | 0 | 9.346779  | 4.755649  | -0.865568 |
| 42 | 1  | 0 | 2.907126  | -5.565244 | 3.058917  | 105 | 1 | 0 | 9.807176  | 4.633991  | -1.855368 |
| 43 | 6  | 0 | 1.617028  | -3.121589 | 0.328174  | 106 | 1 | 0 | 8.889266  | 5.750235  | -0.839549 |
| 44 | 6  | 0 | 3.276820  | -3.748807 | 1.961956  | 107 | 1 | 0 | 10.157674 | 4.736455  | -0.128926 |
| 45 | 1  | 0 | 4.198056  | -3.530343 | 2.492767  | 108 | 6 | 0 | -4.340082 | 2.781106  | 2.356668  |
| 46 | 8  | 0 | -1.304139 | -2.122247 | 0.415124  | 109 | 1 | 0 | -4.292286 | 2.022941  | 3.148574  |
| 47 | 8  | 0 | 1.090347  | -2.211290 | -0.588209 | 110 | 1 | 0 | -3.623200 | 2.476973  | 1.588332  |
| 48 | 15 | 0 | -0.082010 | -1.174018 | -0.109688 | 111 | 1 | 0 | -4.000004 | 3.726088  | 2.792726  |
| 49 | 8  | 0 | 0.348700  | -0.336530 | 1.072965  | 112 | 6 | 0 | -8.219940 | 1.209444  | -0.588694 |
| 50 | 8  | 0 | -0.486082 | -0.441586 | -1.382570 | 113 | 1 | 0 | -7.858281 | 1.361566  | -1.613298 |
| 51 | 6  | 0 | -3.163108 | -2.558765 | -1.082729 | 114 | 1 | 0 | -8.003967 | 0.168545  | -0.326778 |
| 52 | 6  | 0 | 2.823684  | -2.834986 | 0.995850  | 115 | 1 | 0 | -9.306757 | 1.337530  | -0.605703 |
| 53 | 6  | 0 | 0.172032  | 6.150014  | -0.499373 | 116 | 6 | 0 | -8.670279 | 5.350718  | 2.239824  |
| 54 | 6  | 0 | -0.417940 | 7.143876  | -1.287238 | 117 | 1 | 0 | -8.589331 | 6.196410  | 1.543553  |
| 55 | 6  | 0 | 1.111604  | 6.515287  | 0.473470  | 118 | 1 | 0 | -9.731835 | 5.088486  | 2.306377  |
| 56 | 6  | 0 | -0.087237 | 8.486796  | -1.098743 | 119 | 1 | 0 | -8.347125 | 5.707567  | 3.223412  |
| 57 | 1  | 0 | -1.139209 | 6.866831  | -2.053115 | 120 | 7 | 0 | -4.063384 | -0.342777 | -2.863780 |
| 58 | 6  | 0 | 1.450695  | 7.855556  | 0.653445  | 121 | 6 | 0 | -5.043607 | -0.128449 | -3.824322 |
| 59 | 1  | 0 | 1.588116  | 5.745330  | 1.072869  | 122 | 6 | 0 | -2.848850 | -0.526882 | -3.503031 |
| 60 | 6  | 0 | 0.849020  | 8.844960  | -0.128303 | 123 | 6 | 0 | -4.452736 | -0.184653 | -5.063478 |
| 61 | 1  | 0 | -0.553844 | 9.249464  | -1.716192 | 124 | 1 | 0 | -6.074022 | 0.007474  | -3.530219 |
| 62 | 1  | 0 | 2.187100  | 8.128029  | 1.404627  | 125 | 6 | 0 | -3.062558 | -0.430578 | -4.858093 |
| 63 | 1  | 0 | 1.113788  | 9.889006  | 0.015020  | 126 | 1 | 0 | -1.950620 | -0.692283 | -2.927825 |
| 64 | 6  | 0 | -3.906311 | -1.357896 | -0.600332 | 127 | 1 | 0 | -4.962365 | -0.071425 | -6.011247 |
| 65 | 6  | 0 | -5.055866 | -0.172715 | 1.217120  | 128 | 1 | 0 | -2.301470 | -0.527208 | -5.621138 |
| 66 | 6  | 0 | -5.046795 | 0.777560  | -0.977245 | 129 | 7 | 0 | -4.035929 | -2.300760 | 1.684638  |
| 67 | 6  | 0 | -5.434583 | 0.866878  | 0.363458  | 130 | 6 | 0 | -3.423109 | -2.120730 | 2.912367  |
| 68 | 1  | 0 | -5.378667 | -0.174753 | 2.253090  | 131 | 6 | 0 | -4.479068 | -3.609692 | 1.598899  |
| 69 | 1  | 0 | -5.306402 | 1.571108  | -1.670232 | 132 | 6 | 0 | -3.461509 | -3.313400 | 3.594455  |
| 70 | 6  | 0 | 3.660523  | -1.638133 | 0.683546  | 133 | 1 | 0 | -2.968527 | -1.172319 | 3.156996  |
| 71 | 6  | 0 | 4.924406  | 0.334039  | 1.408569  | 134 | 6 | 0 | -4.136560 | -4.257216 | 2.762894  |
| 72 | 6  | 0 | 5.056699  | -0.358823 | -0.878007 | 135 | 1 | 0 | -5.009285 | -3.951129 | 0.722993  |
| 73 | 6  | 0 | 5.442620  | 0.532344  | 0.126208  | 136 | 1 | 0 | -3.039008 | -3.494245 | 4.573696  |
| 74 | 1  | 0 | 5.189623  | 1.013908  | 2.211912  | 137 | 1 | 0 | -4.354974 | -5.290920 | 2.996218  |
| 75 | 1  | 0 | 5.472723  | -0.266834 | -1.876459 | 138 | 7 | 0 | 3.924563  | -2.327023 | -1.682118 |
| 76 | 6  | 0 | 6.434599  | 1.625573  | -0.138494 | 139 | 6 | 0 | 3.510948  | -1.945957 | -2.946758 |
| 77 | 6  | 0 | 8.328944  | 3.671410  | -0.596773 | 140 | 6 | 0 | 4.166828  | -3.689975 | -1.691748 |
| 78 | 6  | 0 | -6.263098 | 2.012811  | 0.855229  | 141 | 6 | 0 | 3.474519  | -3.061443 | -3.748372 |
| 79 | 6  | 0 | -7.839304 | 4.177341  | 1.775921  | 142 | 1 | 0 | 3.241525  | -0.918911 | -3.142442 |
| 80 | 6  | 0 | -4.320004 | -0.315871 | -1.463564 | 143 | 6 | 0 | 3.896273  | -4.168144 | -2.952709 |
| 81 | 6  | 0 | -4.310916 | -1.259369 | 0.751311  | 144 | 1 | 0 | 4.526507  | -4.188544 | -0.805067 |
| 82 | 6  | 0 | 4.191466  | -1.426415 | -0.609956 | 145 | 1 | 0 | 3.166589  | -3.084970 | -4.785102 |
| 83 | 6  | 0 | 4.060718  | -0.728924 | 1.691541  | 146 | 1 | 0 | 4.000722  | -5.196685 | -3.271736 |
| 84 | 6  | 0 | -7.587075 | 2.178865  | 0.387758  | 147 | 7 | 0 | 3.645232  | -0.877929 | 3.045348  |
| 85 | 6  | 0 | -8.347352 | 3.253072  | 0.859455  | 148 | 6 | 0 | 4.524422  | -0.933897 | 4.117957  |
| 86 | 1  | 0 | -9.369903 | 3.365705  | 0.503734  | 149 | 6 | 0 | 2.349385  | -0.951926 | 3.526887  |
| 87 | 6  | 0 | -6.533897 | 3.989999  | 2.233917  | 150 | 6 | 0 | 3.787463  | -1.053118 | 5.272160  |
| 88 | 1  | 0 | -6.118206 | 4.691793  | 2.954779  | 151 | 1 | 0 | 5.591281  | -0.911783 | 3.949383  |
| 89 | 6  | 0 | -5.739570 | 2.924060  | 1.797991  | 152 | 6 | 0 | 2.411479  | -1.057748 | 4.896823  |
| 90 | 6  | 0 | 6.969026  | 3.882948  | -0.830910 | 153 | 1 | 0 | 1.511096  | -0.893275 | 2.848190  |
| 91 | 1  | 0 | 6.636494  | 4.854813  | -1.191222 | 154 | 1 | 0 | 4.190974  | -1.132773 | 6.273023  |
| 92 | 6  | 0 | 6.013552  | 2.882825  | -0.615342 | 155 | 1 | 0 | 1.558590  | -1.125474 | 5.559126  |

## 12. DFT Calculation for Distortion Analysis of SPINOL-derived CPA (S)-1bd in Transition States

Distortion analysis of the anion form of CPA (S)-1bd in the transition states.

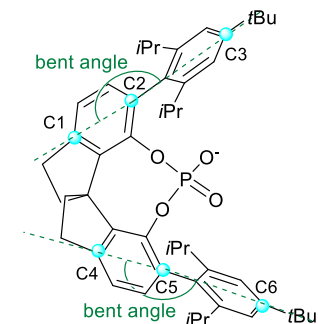

anion form of (S)-1bd  
bent angles : 176.1° and 176.1°  
set to distortion energy: 0.0 kcal/mol

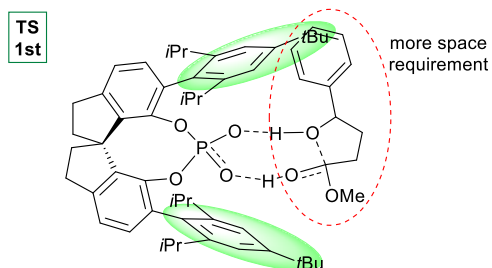

| catalyst structure taken from TS of 1 <sup>st</sup> step | distortion energy (kcal/mol) | bent angles       |
|----------------------------------------------------------|------------------------------|-------------------|
| From <b>R-anti (-2.61)*</b>                              | 7.9                          | 172.1° and 175.9° |
| From <b>S-syn (1.63)*</b>                                | 8.8                          | 172.2° and 176.6° |
| cf. From <b>S-anti (2.35)*</b>                           | 9.4                          | 171.3° and 174.5° |

\*  $\Delta\Delta G^\ddagger$  (kcal/mol) of the corresponding TSs.

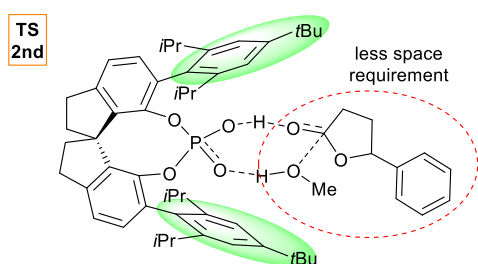

| catalyst structure taken from TS of 2 <sup>nd</sup> step | distortion energy (kcal/mol) | bent angles       |
|----------------------------------------------------------|------------------------------|-------------------|
| From <b>R-re (0.00)*</b>                                 | 7.1                          | 176.4° and 177.6° |
| From <b>S-re (-0.57)*</b>                                | 6.9                          | 175.8° and 177.3° |
| cf. From <b>S-si (0.88)*</b>                             | 7.8                          | 173.0° and 173.3° |

\*  $\Delta\Delta G^\ddagger$  (kcal/mol) of the corresponding TSs.

Optimized structure of the anion form (phosphate) of CPA (S)-1bd

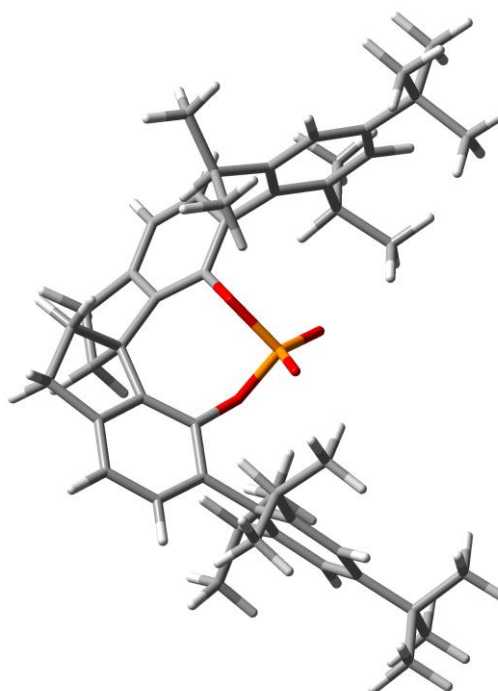

B3LYP/6-31+G(d); E(RB3LYP) = -2547.11082979 Hartree  
Zero-point correction= 1.001453 Hartree  
Thermal correction to Energy= 1.056070 Hartree  
Thermal correction to Enthalpy= 1.057014 Hartree  
Thermal correction to Gibbs Free Energy= 0.913807 Hartree  
Sum of electronic and zero-point Energies= -2546.109376 Hartree  
Sum of electronic and thermal Energies= -2546.054760 Hartree  
Sum of electronic and thermal Enthalpies= -2546.053816 Hartree  
Sum of electronic and thermal Free Energies= -2546.197023 Hartree  
The number of Imaginary frequencies = 0

| Center Number | Atomic Number | Atomic Type | Coordinates (Angstroms) |           |           |
|---------------|---------------|-------------|-------------------------|-----------|-----------|
|               |               |             | X                       | Y         | Z         |
| 1             | 6             | 0           | 0.412586                | 4.497699  | 1.208331  |
| 2             | 6             | 0           | 0.000408                | 3.590305  | -0.000850 |
| 3             | 6             | 0           | -1.213440               | 2.883618  | 0.597825  |
| 4             | 6             | 0           | -1.806214               | 3.701448  | 1.571037  |
| 5             | 6             | 0           | -0.922900               | 4.893661  | 1.877023  |
| 6             | 6             | 0           | -0.411983               | 4.496635  | -1.210782 |
| 7             | 6             | 0           | 0.923353                | 4.892032  | -1.880079 |
| 8             | 6             | 0           | 1.806657                | 3.700007  | -1.573357 |
| 9             | 6             | 0           | 1.214236                | 2.883216  | -0.599053 |
| 10            | 6             | 0           | 3.039620                | 3.365026  | -2.126871 |
| 11            | 6             | 0           | 3.668210                | 2.190214  | -1.704457 |
| 12            | 6             | 0           | 3.063891                | 1.305331  | -0.796509 |
| 13            | 6             | 0           | 1.798803                | 1.654902  | -0.267271 |
| 14            | 6             | 0           | -1.797936               | 1.654986  | 0.267051  |
| 15            | 6             | 0           | -3.063465               | 1.306169  | 0.795798  |
| 16            | 6             | 0           | -3.668187               | 2.192217  | 1.702359  |
| 17            | 6             | 0           | -3.039592               | 3.367266  | 2.124097  |
| 18            | 8             | 0           | -1.149977               | 0.817326  | -0.598821 |
| 19            | 8             | 0           | 1.151158                | 0.818230  | 0.599868  |
| 20            | 15            | 0           | 0.000658                | -0.285050 | 0.001202  |
| 21            | 8             | 0           | 0.528836                | -0.953532 | -1.225897 |
| 22            | 8             | 0           | -0.527467               | -0.952206 | 1.229006  |
| 23            | 6             | 0           | 3.785347                | 0.049998  | -0.395347 |
| 24            | 6             | 0           | -3.785102               | 0.050681  | 0.395357  |
| 25            | 6             | 0           | 4.019646                | -0.985335 | -1.337982 |
| 26            | 6             | 0           | 4.759229                | -2.105270 | -0.945045 |

|    |   |   |           |           |           |     |   |   |          |           |           |
|----|---|---|-----------|-----------|-----------|-----|---|---|----------|-----------|-----------|
| 27 | 6 | 0 | 5.271257  | -2.268128 | 0.348367  | 96  | 1 | 0 | 5.296837 | 2.397040  | 3.156552  |
| 28 | 6 | 0 | 5.019281  | -1.240377 | 1.259018  | 97  | 1 | 0 | 6.100376 | 0.835818  | 2.913767  |
| 29 | 6 | 0 | 4.293971  | -0.088923 | 0.916770  | 98  | 1 | 0 | 3.139443 | 1.263618  | 3.925296  |
| 30 | 6 | 0 | -4.291654 | -0.089774 | -0.917443 | 99  | 1 | 0 | 3.859141 | -0.343483 | 3.726526  |
| 31 | 6 | 0 | -5.016910 | -1.241348 | -1.259426 | 100 | 1 | 0 | 2.343742 | 0.060968  | 2.887437  |
| 32 | 6 | 0 | -5.271056 | -2.267791 | -0.347856 | 101 | 1 | 0 | 2.792954 | -0.098756 | -2.842113 |
| 33 | 6 | 0 | -4.761320 | -2.103311 | 0.946280  | 102 | 1 | 0 | 2.278942 | -2.069921 | -4.169742 |
| 34 | 6 | 0 | -4.021831 | -0.983221 | 1.339028  | 103 | 1 | 0 | 3.342587 | -3.091365 | -3.191001 |
| 35 | 6 | 0 | -4.104602 | 0.979994  | -1.994454 | 104 | 1 | 0 | 1.880170 | -2.354843 | -2.464979 |
| 36 | 6 | 0 | -5.453880 | 1.583892  | -2.437098 | 105 | 1 | 0 | 4.237018 | -0.595081 | -4.801472 |
| 37 | 6 | 0 | -3.309743 | 0.449819  | -3.204091 | 106 | 1 | 0 | 5.356082 | -1.516366 | -3.778352 |
| 38 | 6 | 0 | -3.500155 | -0.929533 | 2.776980  | 107 | 1 | 0 | 5.194518 | 0.232406  | -3.556473 |
| 39 | 6 | 0 | -2.713042 | -2.194605 | 3.171312  | 108 | 1 | 0 | 5.719805 | -3.479054 | 2.886235  |
| 40 | 6 | 0 | -4.645093 | -0.677267 | 3.781945  | 109 | 1 | 0 | 7.103137 | -4.461304 | 2.381029  |
| 41 | 6 | 0 | -6.054072 | -3.544000 | -0.713379 | 110 | 1 | 0 | 7.227028 | -2.694435 | 2.369926  |
| 42 | 6 | 0 | -5.142600 | -4.781275 | -0.524234 | 111 | 1 | 0 | 7.962617 | -2.822931 | -0.089754 |
| 43 | 6 | 0 | -6.547637 | -3.537734 | -2.173898 | 112 | 1 | 0 | 7.005806 | -3.739925 | -1.262946 |
| 44 | 6 | 0 | -7.292767 | -3.679995 | 0.205298  | 113 | 1 | 0 | 7.853924 | -4.593392 | 0.039165  |
| 45 | 6 | 0 | 4.108587  | 0.982212  | 1.992699  | 114 | 1 | 0 | 4.257063 | -4.712028 | 1.172545  |
| 46 | 6 | 0 | 5.458545  | 1.585839  | 2.433611  | 115 | 1 | 0 | 4.790558 | -4.874555 | -0.504006 |
| 47 | 6 | 0 | 3.314368  | 0.453809  | 3.203530  | 116 | 1 | 0 | 5.684596 | -5.701543 | 0.786269  |
| 48 | 6 | 0 | 3.494998  | -0.933226 | -2.774888 |     |   |   |          |           |           |
| 49 | 6 | 0 | 2.704207  | -2.197393 | -3.164796 |     |   |   |          |           |           |
| 50 | 6 | 0 | 4.638186  | -0.684913 | -3.782771 |     |   |   |          |           |           |
| 51 | 6 | 0 | 6.054350  | -3.544139 | 0.714261  |     |   |   |          |           |           |
| 52 | 6 | 0 | 6.550964  | -3.535582 | 2.173695  |     |   |   |          |           |           |
| 53 | 6 | 0 | 7.290886  | -3.682330 | -0.206958 |     |   |   |          |           |           |
| 54 | 6 | 0 | 5.141744  | -4.781173 | 0.529082  |     |   |   |          |           |           |
| 55 | 1 | 0 | 1.017454  | 5.357618  | 0.898431  |     |   |   |          |           |           |
| 56 | 1 | 0 | 1.011856  | 3.898567  | 1.904139  |     |   |   |          |           |           |
| 57 | 1 | 0 | -0.818852 | 5.071936  | 2.955062  |     |   |   |          |           |           |
| 58 | 1 | 0 | -1.329410 | 5.819304  | 1.441481  |     |   |   |          |           |           |
| 59 | 1 | 0 | -1.011348 | 3.896870  | -1.905963 |     |   |   |          |           |           |
| 60 | 1 | 0 | -1.016837 | 5.356805  | -0.901555 |     |   |   |          |           |           |
| 61 | 1 | 0 | 1.330001  | 5.817984  | -1.445324 |     |   |   |          |           |           |
| 62 | 1 | 0 | 0.819064  | 5.069495  | -2.958229 |     |   |   |          |           |           |
| 63 | 1 | 0 | 3.510301  | 4.001440  | -2.874326 |     |   |   |          |           |           |
| 64 | 1 | 0 | 4.645594  | 1.932423  | -2.103966 |     |   |   |          |           |           |
| 65 | 1 | 0 | -4.645984 | 1.935248  | 2.101308  |     |   |   |          |           |           |
| 66 | 1 | 0 | -3.510660 | 4.004521  | 2.870592  |     |   |   |          |           |           |
| 67 | 1 | 0 | 4.922463  | -2.889218 | -1.679639 |     |   |   |          |           |           |
| 68 | 1 | 0 | 5.391037  | -1.320742 | 2.274981  |     |   |   |          |           |           |
| 69 | 1 | 0 | -5.386933 | -1.322824 | -2.275925 |     |   |   |          |           |           |
| 70 | 1 | 0 | -4.926377 | -2.886117 | 1.681680  |     |   |   |          |           |           |
| 71 | 1 | 0 | -3.521624 | 1.796833  | -1.562648 |     |   |   |          |           |           |
| 72 | 1 | 0 | -6.003617 | 1.996354  | -1.582080 |     |   |   |          |           |           |
| 73 | 1 | 0 | -5.291147 | 2.394128  | -3.160891 |     |   |   |          |           |           |
| 74 | 1 | 0 | -6.095799 | 0.833663  | -2.916813 |     |   |   |          |           |           |
| 75 | 1 | 0 | -3.133582 | 1.258827  | -3.926448 |     |   |   |          |           |           |
| 76 | 1 | 0 | -3.854670 | -0.347523 | -3.726851 |     |   |   |          |           |           |
| 77 | 1 | 0 | -2.339663 | 0.056554  | -2.886846 |     |   |   |          |           |           |
| 78 | 1 | 0 | -2.796579 | -0.096327 | 2.844205  |     |   |   |          |           |           |
| 79 | 1 | 0 | -3.353621 | -3.086957 | 3.198698  |     |   |   |          |           |           |
| 80 | 1 | 0 | -1.888206 | -2.356089 | 2.473381  |     |   |   |          |           |           |
| 81 | 1 | 0 | -2.289181 | -2.065654 | 4.176643  |     |   |   |          |           |           |
| 82 | 1 | 0 | -4.245979 | -0.586240 | 4.801351  |     |   |   |          |           |           |
| 83 | 1 | 0 | -5.364361 | -1.507535 | 3.777492  |     |   |   |          |           |           |
| 84 | 1 | 0 | -5.199464 | 0.240512  | 3.552818  |     |   |   |          |           |           |
| 85 | 1 | 0 | -4.256445 | -4.713648 | -1.165827 |     |   |   |          |           |           |
| 86 | 1 | 0 | -4.793787 | -4.873261 | 0.509780  |     |   |   |          |           |           |
| 87 | 1 | 0 | -5.685403 | -5.701732 | -0.781203 |     |   |   |          |           |           |
| 88 | 1 | 0 | -7.222975 | -2.696686 | -2.372998 |     |   |   |          |           |           |
| 89 | 1 | 0 | -7.099752 | -4.463599 | -2.380747 |     |   |   |          |           |           |
| 90 | 1 | 0 | -5.714987 | -3.482817 | -2.884817 |     |   |   |          |           |           |
| 91 | 1 | 0 | -7.855785 | -4.591122 | -0.040631 |     |   |   |          |           |           |
| 92 | 1 | 0 | -7.010128 | -3.736065 | 1.262027  |     |   |   |          |           |           |
| 93 | 1 | 0 | -7.963741 | -2.820403 | 0.085207  |     |   |   |          |           |           |
| 94 | 1 | 0 | 3.525708  | 1.798891  | 1.560406  |     |   |   |          |           |           |
| 95 | 1 | 0 | 6.007892  | 1.996944  | 1.577690  |     |   |   |          |           |           |

  

| <b>Phosphate in <i>R-anti</i></b>                   |        |        |                         |           |           |           |  |  |  |  |  |
|-----------------------------------------------------|--------|--------|-------------------------|-----------|-----------|-----------|--|--|--|--|--|
| B3LYP/6-31+G(d); E(RB3LYP) = -2547.09819535 Hartree |        |        |                         |           |           |           |  |  |  |  |  |
| -----                                               |        |        |                         |           |           |           |  |  |  |  |  |
| Center                                              | Atomic | Atomic | Coordinates (Angstroms) |           |           |           |  |  |  |  |  |
| Number                                              | Number | Type   | X                       | Y         | Z         |           |  |  |  |  |  |
| -----                                               |        |        |                         |           |           |           |  |  |  |  |  |
|                                                     | 1      | 6      | 0                       | 1.183691  | 2.787273  | -0.680063 |  |  |  |  |  |
|                                                     | 2      | 6      | 0                       | 1.779978  | 1.588462  | -0.288080 |  |  |  |  |  |
|                                                     | 3      | 6      | 0                       | 3.645795  | 2.042858  | -1.736025 |  |  |  |  |  |
|                                                     | 4      | 6      | 0                       | 3.018495  | 3.190380  | -2.218225 |  |  |  |  |  |
|                                                     | 5      | 6      | 0                       | 1.783544  | 3.551609  | -1.693858 |  |  |  |  |  |
|                                                     | 6      | 1      | 0                       | 4.626881  | 1.769436  | -2.111486 |  |  |  |  |  |
|                                                     | 7      | 1      | 0                       | 3.494194  | 3.791324  | -2.989336 |  |  |  |  |  |
|                                                     | 8      | 6      | 0                       | 0.905880  | 4.724013  | -2.072133 |  |  |  |  |  |
|                                                     | 9      | 1      | 0                       | 1.305451  | 5.668004  | -1.675294 |  |  |  |  |  |
|                                                     | 10     | 1      | 0                       | 0.821423  | 4.850607  | -3.157609 |  |  |  |  |  |
|                                                     | 11     | 6      | 0                       | -0.038230 | 3.526619  | -0.140308 |  |  |  |  |  |
|                                                     | 12     | 6      | 0                       | -0.437057 | 4.357437  | -1.407832 |  |  |  |  |  |
|                                                     | 13     | 1      | 0                       | -1.019101 | 3.715271  | -2.078745 |  |  |  |  |  |
|                                                     | 14     | 1      | 0                       | -1.053798 | 5.226796  | -1.160415 |  |  |  |  |  |
|                                                     | 15     | 6      | 0                       | 0.345765  | 4.505167  | 1.019775  |  |  |  |  |  |
|                                                     | 16     | 1      | 0                       | 0.914933  | 3.949955  | 1.774208  |  |  |  |  |  |
|                                                     | 17     | 1      | 0                       | 0.968390  | 5.337589  | 0.677140  |  |  |  |  |  |
|                                                     | 18     | 6      | 0                       | -1.009264 | 4.954447  | 1.610779  |  |  |  |  |  |
|                                                     | 19     | 1      | 0                       | -1.389552 | 5.852582  | 1.104184  |  |  |  |  |  |
|                                                     | 20     | 1      | 0                       | -0.943374 | 5.200974  | 2.676876  |  |  |  |  |  |
|                                                     | 21     | 6      | 0                       | -1.894385 | 3.754204  | 1.350474  |  |  |  |  |  |
|                                                     | 22     | 6      | 0                       | -1.266840 | 2.859621  | 0.469868  |  |  |  |  |  |
|                                                     | 23     | 6      | 0                       | -3.159982 | 3.476157  | 1.853000  |  |  |  |  |  |
|                                                     | 24     | 1      | 0                       | -3.663066 | 4.175677  | 2.516166  |  |  |  |  |  |
|                                                     | 25     | 6      | 0                       | -1.857351 | 1.623183  | 0.219321  |  |  |  |  |  |
|                                                     | 26     | 6      | 0                       | -3.787405 | 2.285813  | 1.484176  |  |  |  |  |  |
|                                                     | 27     | 1      | 0                       | -4.793956 | 2.081600  | 1.834238  |  |  |  |  |  |
|                                                     | 28     | 8      | 0                       | 1.128136  | 0.784857  | 0.649297  |  |  |  |  |  |
|                                                     | 29     | 8      | 0                       | -1.161369 | 0.687325  | -0.548240 |  |  |  |  |  |
|                                                     | 30     | 15     | 0                       | -0.032725 | -0.259733 | 0.154902  |  |  |  |  |  |
|                                                     | 31     | 8      | 0                       | -0.573447 | -0.854111 | 1.455621  |  |  |  |  |  |
|                                                     | 32     | 8      | 0                       | 0.462295  | -1.207743 | -0.905491 |  |  |  |  |  |
|                                                     | 33     | 6      | 0                       | 3.038806  | 1.200194  | -0.789761 |  |  |  |  |  |
|                                                     | 34     | 6      | 0                       | -3.148948 | 1.316077  | 0.693135  |  |  |  |  |  |
|                                                     | 35     | 6      | 0                       | -3.863571 | 0.037717  | 0.362276  |  |  |  |  |  |
|                                                     | 36     | 6      | 0                       | -4.242281 | -0.864388 | 1.386322  |  |  |  |  |  |
|                                                     | 37     | 6      | 0                       | -4.240520 | -0.241583 | -0.976678 |  |  |  |  |  |
|                                                     | 38     | 6      | 0                       | -4.980846 | -2.008379 | 1.050349  |  |  |  |  |  |
|                                                     | 39     | 6      | 0                       | -4.969238 | -1.401198 | -1.250810 |  |  |  |  |  |
|                                                     | 40     | 6      | 0                       | -5.359665 | -2.307523 | -0.259000 |  |  |  |  |  |

|     |   |   |           |           |           |     |   |   |          |           |           |
|-----|---|---|-----------|-----------|-----------|-----|---|---|----------|-----------|-----------|
| 41  | 1 | 0 | -5.265485 | -2.678667 | 1.853178  | 110 | 1 | 0 | 5.710222 | -4.864851 | -0.523786 |
| 42  | 1 | 0 | -5.252924 | -1.592728 | -2.281939 | 111 | 1 | 0 | 7.042710 | -3.937593 | -1.240467 |
| 43  | 6 | 0 | 3.783984  | -0.026736 | -0.346234 | 112 | 1 | 0 | 7.371399 | -5.122639 | 0.028042  |
| 44  | 6 | 0 | 4.346433  | -0.086306 | 0.953673  | 113 | 6 | 0 | 6.057195 | -3.995465 | 2.088592  |
| 45  | 6 | 0 | 4.050829  | -1.073126 | -1.261874 | 114 | 1 | 0 | 6.812038 | -4.729635 | 2.395947  |
| 46  | 6 | 0 | 5.170072  | -1.164582 | 1.291713  | 115 | 1 | 0 | 5.923506 | -3.292588 | 2.917335  |
| 47  | 6 | 0 | 4.890956  | -2.125847 | -0.868953 | 116 | 1 | 0 | 5.111916 | -4.530582 | 1.943434  |
| 48  | 6 | 0 | 5.483465  | -2.192987 | 0.394110  |     |   |   |          |           |           |
| 49  | 1 | 0 | 5.613281  | -1.176155 | 2.283947  |     |   |   |          |           |           |
| 50  | 1 | 0 | 5.098333  | -2.902628 | -1.596020 |     |   |   |          |           |           |
| 51  | 6 | 0 | 3.498492  | -1.092423 | -2.690222 |     |   |   |          |           |           |
| 52  | 6 | 0 | 4.616287  | -0.852710 | -3.726609 |     |   |   |          |           |           |
| 53  | 6 | 0 | 2.744742  | -2.394270 | -3.021947 |     |   |   |          |           |           |
| 54  | 1 | 0 | 2.774409  | -0.279088 | -2.782473 |     |   |   |          |           |           |
| 55  | 1 | 0 | 5.359806  | -1.658824 | -3.701895 |     |   |   |          |           |           |
| 56  | 1 | 0 | 5.146195  | 0.088997  | -3.548397 |     |   |   |          |           |           |
| 57  | 1 | 0 | 1.906758  | -2.540723 | -2.338045 |     |   |   |          |           |           |
| 58  | 1 | 0 | 3.399586  | -3.273056 | -2.976515 |     |   |   |          |           |           |
| 59  | 6 | 0 | 4.145539  | 1.019501  | 1.991362  |     |   |   |          |           |           |
| 60  | 6 | 0 | 3.413137  | 0.507031  | 3.246011  |     |   |   |          |           |           |
| 61  | 6 | 0 | 5.479404  | 1.696732  | 2.364136  |     |   |   |          |           |           |
| 62  | 1 | 0 | 3.514274  | 1.792808  | 1.547345  |     |   |   |          |           |           |
| 63  | 1 | 0 | 3.984931  | -0.279800 | 3.753668  |     |   |   |          |           |           |
| 64  | 1 | 0 | 2.428479  | 0.108544  | 2.981469  |     |   |   |          |           |           |
| 65  | 1 | 0 | 5.983901  | 2.091438  | 1.475223  |     |   |   |          |           |           |
| 66  | 1 | 0 | 6.167405  | 0.998777  | 2.855682  |     |   |   |          |           |           |
| 67  | 6 | 0 | -3.901362 | -0.646146 | 2.863040  |     |   |   |          |           |           |
| 68  | 6 | 0 | -5.151355 | -0.247264 | 3.675454  |     |   |   |          |           |           |
| 69  | 6 | 0 | -3.235597 | -1.874249 | 3.511833  |     |   |   |          |           |           |
| 70  | 1 | 0 | -3.180898 | 0.173424  | 2.925720  |     |   |   |          |           |           |
| 71  | 1 | 0 | -5.898330 | -1.050509 | 3.665463  |     |   |   |          |           |           |
| 72  | 1 | 0 | -5.633241 | 0.652357  | 3.278475  |     |   |   |          |           |           |
| 73  | 1 | 0 | -2.360373 | -2.198806 | 2.946579  |     |   |   |          |           |           |
| 74  | 1 | 0 | -3.926977 | -2.722210 | 3.590338  |     |   |   |          |           |           |
| 75  | 6 | 0 | -3.935970 | 0.699739  | -2.143360 |     |   |   |          |           |           |
| 76  | 6 | 0 | -3.087314 | 0.018064  | -3.233511 |     |   |   |          |           |           |
| 77  | 6 | 0 | -5.231379 | 1.291235  | -2.735114 |     |   |   |          |           |           |
| 78  | 1 | 0 | -3.353610 | 1.541984  | -1.762929 |     |   |   |          |           |           |
| 79  | 1 | 0 | -3.626284 | -0.812735 | -3.704903 |     |   |   |          |           |           |
| 80  | 1 | 0 | -2.154088 | -0.371384 | -2.816923 |     |   |   |          |           |           |
| 81  | 1 | 0 | -5.814593 | 1.814400  | -1.968853 |     |   |   |          |           |           |
| 82  | 1 | 0 | -5.871200 | 0.512355  | -3.166673 |     |   |   |          |           |           |
| 83  | 1 | 0 | 4.197224  | -0.817526 | -4.739554 |     |   |   |          |           |           |
| 84  | 1 | 0 | 2.342125  | -2.340815 | -4.040751 |     |   |   |          |           |           |
| 85  | 1 | 0 | 5.304589  | 2.530907  | 3.054506  |     |   |   |          |           |           |
| 86  | 1 | 0 | 3.265389  | 1.323654  | 3.963403  |     |   |   |          |           |           |
| 87  | 1 | 0 | -2.908525 | -1.629285 | 4.529394  |     |   |   |          |           |           |
| 88  | 1 | 0 | -4.883719 | -0.053617 | 4.721558  |     |   |   |          |           |           |
| 89  | 1 | 0 | -2.836502 | 0.736663  | -4.023740 |     |   |   |          |           |           |
| 90  | 1 | 0 | -4.996441 | 2.007515  | -3.532131 |     |   |   |          |           |           |
| 91  | 6 | 0 | -6.181190 | -3.555030 | -0.633967 |     |   |   |          |           |           |
| 92  | 6 | 0 | -5.393512 | -4.407400 | -1.656715 |     |   |   |          |           |           |
| 93  | 1 | 0 | -4.436708 | -4.737685 | -1.235790 |     |   |   |          |           |           |
| 94  | 1 | 0 | -5.969049 | -5.298419 | -1.937453 |     |   |   |          |           |           |
| 95  | 1 | 0 | -5.175461 | -3.848595 | -2.572374 |     |   |   |          |           |           |
| 96  | 6 | 0 | -6.496050 | -4.441551 | 0.585858  |     |   |   |          |           |           |
| 97  | 1 | 0 | -5.583504 | -4.806355 | 1.071601  |     |   |   |          |           |           |
| 98  | 1 | 0 | -7.090008 | -3.907641 | 1.336156  |     |   |   |          |           |           |
| 99  | 1 | 0 | -7.074726 | -5.316574 | 0.268097  |     |   |   |          |           |           |
| 100 | 6 | 0 | -7.523818 | -3.115279 | -1.265498 |     |   |   |          |           |           |
| 101 | 1 | 0 | -8.110275 | -2.516535 | -0.559206 |     |   |   |          |           |           |
| 102 | 1 | 0 | -7.370358 | -2.512149 | -2.166322 |     |   |   |          |           |           |
| 103 | 1 | 0 | -8.120998 | -3.991739 | -1.547060 |     |   |   |          |           |           |
| 104 | 6 | 0 | 6.496759  | -3.286149 | 0.787522  |     |   |   |          |           |           |
| 105 | 6 | 0 | 7.876777  | -2.622485 | 1.017924  |     |   |   |          |           |           |
| 106 | 1 | 0 | 7.839200  | -1.880916 | 1.822836  |     |   |   |          |           |           |
| 107 | 1 | 0 | 8.625138  | -3.377286 | 1.290301  |     |   |   |          |           |           |
| 108 | 1 | 0 | 8.221134  | -2.112891 | 0.110950  |     |   |   |          |           |           |
| 109 | 6 | 0 | 6.658411  | -4.359965 | -0.305491 |     |   |   |          |           |           |

  

**Phosphate in R-re**  
B3LYP/6-31+G(d); E(RB3LYP) = -2547.09952708 Hartree

| Center Number | Atomic Number | Atomic Type | Coordinates (Angstroms) |           |           |
|---------------|---------------|-------------|-------------------------|-----------|-----------|
|               |               |             | X                       | Y         | Z         |
| 1             | 6             | 0           | -1.269065               | 2.914407  | 0.580515  |
| 2             | 6             | 0           | -1.857408               | 1.703854  | 0.217799  |
| 3             | 6             | 0           | -3.754936               | 2.202082  | 1.609463  |
| 4             | 6             | 0           | -3.141767               | 3.372244  | 2.056833  |
| 5             | 6             | 0           | -1.892673               | 3.713774  | 1.552178  |
| 6             | 1             | 0           | -4.739434               | 1.935664  | 1.981876  |
| 7             | 1             | 0           | -3.635933               | 4.001430  | 2.793105  |
| 8             | 6             | 0           | -1.016432               | 4.892042  | 1.916780  |
| 9             | 1             | 0           | -1.394257               | 5.825861  | 1.476843  |
| 10            | 1             | 0           | -0.962631               | 5.054511  | 2.999445  |
| 11            | 6             | 0           | -0.027202               | 3.627649  | 0.051895  |
| 12            | 6             | 0           | 0.342926                | 4.491995  | 1.305749  |
| 13            | 1             | 0           | 0.896510                | 3.864193  | 2.013395  |
| 14            | 1             | 0           | 0.976527                | 5.347506  | 1.052338  |
| 15            | 6             | 0           | -0.371850               | 4.576985  | -1.144154 |
| 16            | 1             | 0           | -0.924373               | 4.005463  | -1.898698 |
| 17            | 1             | 0           | -0.997182               | 5.422511  | -0.841052 |
| 18            | 6             | 0           | 1.002053                | 5.000499  | -1.708918 |
| 19            | 1             | 0           | 1.378208                | 5.905653  | -1.211782 |
| 20            | 1             | 0           | 0.967294                | 5.224012  | -2.781524 |
| 21            | 6             | 0           | 1.867055                | 3.797323  | -1.399578 |
| 22            | 6             | 0           | 1.210289                | 2.931721  | -0.510166 |
| 23            | 6             | 0           | 3.136523                | 3.491847  | -1.875657 |
| 24            | 1             | 0           | 3.659293                | 4.171095  | -2.544657 |
| 25            | 6             | 0           | 1.779885                | 1.691971  | -0.225502 |
| 26            | 6             | 0           | 3.739559                | 2.298316  | -1.477369 |
| 27            | 1             | 0           | 4.746699                | 2.070119  | -1.811366 |
| 28            | 8             | 0           | -1.192071               | 0.874070  | -0.684328 |
| 29            | 8             | 0           | 1.068606                | 0.778011  | 0.550673  |
| 30            | 15            | 0           | -0.053641               | -0.179114 | -0.153644 |
| 31            | 8             | 0           | 0.498266                | -0.803107 | -1.432545 |
| 32            | 8             | 0           | -0.549472               | -1.100442 | 0.929689  |
| 33            | 6             | 0           | -3.121834               | 1.325019  | 0.714186  |
| 34            | 6             | 0           | 3.071846                | 1.355366  | -0.679175 |
| 35            | 6             | 0           | 3.750170                | 0.063444  | -0.324790 |
| 36            | 6             | 0           | 4.109026                | -0.864384 | -1.333280 |
| 37            | 6             | 0           | 4.107412                | -0.209792 | 1.020720  |
| 38            | 6             | 0           | 4.809547                | -2.026237 | -0.976250 |
| 39            | 6             | 0           | 4.800070                | -1.386494 | 1.316280  |
| 40            | 6             | 0           | 5.171884                | -2.317599 | 0.340031  |
| 41            | 1             | 0           | 5.081678                | -2.715058 | -1.767768 |
| 42            | 1             | 0           | 5.072217                | -1.570334 | 2.351916  |
| 43            | 6             | 0           | -3.789455               | 0.039315  | 0.324917  |
| 44            | 6             | 0           | -4.234776               | -0.161741 | -1.001457 |
| 45            | 6             | 0           | -4.022112               | -0.970989 | 1.295126  |
| 46            | 6             | 0           | -4.860253               | -1.370567 | -1.340391 |
| 47            | 6             | 0           | -4.663554               | -2.148045 | 0.901943  |
| 48            | 6             | 0           | -5.082214               | -2.389532 | -0.411449 |
| 49            | 1             | 0           | -5.195630               | -1.498037 | -2.363955 |
| 50            | 1             | 0           | -4.834284               | -2.910871 | 1.655564  |
| 51            | 6             | 0           | -4.131337               | 0.920748  | -2.077656 |
| 52            | 6             | 0           | -3.327704               | 0.463003  | -3.308880 |
| 53            | 6             | 0           | -5.530334               | 1.424777  | -2.487027 |
| 54            | 1             | 0           | -3.601138               | 1.775655  | -1.650489 |

|     |   |   |           |           |           |    |    |   |           |           |           |
|-----|---|---|-----------|-----------|-----------|----|----|---|-----------|-----------|-----------|
| 55  | 1 | 0 | -3.810254 | -0.380608 | -3.817912 |    |    |   |           |           |           |
| 56  | 1 | 0 | -2.315028 | 0.164400  | -3.022461 | 1  | 6  | 0 | -1.263719 | 2.865587  | 0.454684  |
| 57  | 1 | 0 | -6.087249 | 1.794088  | -1.618646 | 2  | 6  | 0 | -1.863024 | 1.628988  | 0.227934  |
| 58  | 1 | 0 | -6.125736 | 0.629161  | -2.950581 | 3  | 6  | 0 | -3.802313 | 2.342785  | 1.448802  |
| 59  | 6 | 0 | -3.633600 | -0.822576 | 2.769480  | 4  | 6  | 0 | -3.164490 | 3.532468  | 1.802339  |
| 60  | 6 | 0 | -4.888370 | -0.654511 | 3.651767  | 5  | 6  | 0 | -1.890025 | 3.785897  | 1.309101  |
| 61  | 6 | 0 | -2.768059 | -1.985184 | 3.291403  | 6  | 1  | 0 | -4.816651 | 2.160046  | 1.787615  |
| 62  | 1 | 0 | -3.032042 | 0.083729  | 2.872871  | 7  | 1  | 0 | -3.667936 | 4.251634  | 2.443914  |
| 63  | 1 | 0 | -5.519147 | -1.551179 | 3.617553  | 8  | 6  | 0 | -0.995160 | 4.983475  | 1.549239  |
| 64  | 1 | 0 | -5.504984 | 0.191696  | 3.328623  | 9  | 1  | 0 | -1.367335 | 5.875693  | 1.026539  |
| 65  | 1 | 0 | -1.838830 | -2.060066 | 2.723334  | 10 | 1  | 0 | -0.929009 | 5.248580  | 2.610935  |
| 66  | 1 | 0 | -3.291535 | -2.947072 | 3.237550  | 11 | 6  | 0 | -0.031777 | 3.512563  | -0.169621 |
| 67  | 6 | 0 | 3.792883  | -0.651697 | -2.816454 | 12 | 6  | 0 | 0.357971  | 4.513492  | 0.968784  |
| 68  | 6 | 0 | 5.068450  | -0.318279 | -3.618336 | 13 | 1  | 0 | 0.924422  | 3.971875  | 1.735126  |
| 69  | 6 | 0 | 3.077608  | -1.856025 | -3.457397 | 14 | 1  | 0 | 0.985105  | 5.334972  | 0.608394  |
| 70  | 1 | 0 | 3.110352  | 0.197667  | -2.898177 | 15 | 6  | 0 | -0.435320 | 4.319305  | -1.451761 |
| 71  | 1 | 0 | 5.777997  | -1.154494 | -3.595463 | 16 | 1  | 0 | -1.024474 | 3.665817  | -2.105293 |
| 72  | 1 | 0 | 5.586017  | 0.560845  | -3.220397 | 17 | 1  | 0 | -1.047128 | 5.195905  | -1.218264 |
| 73  | 1 | 0 | 2.163789  | -2.103799 | -2.913918 | 18 | 6  | 0 | 0.903884  | 4.666023  | -2.132444 |
| 74  | 1 | 0 | 3.717349  | -2.746558 | -3.488604 | 19 | 1  | 0 | 1.311806  | 5.614752  | -1.755826 |
| 75  | 6 | 0 | 3.817978  | 0.754266  | 2.172389  | 20 | 1  | 0 | 0.812359  | 4.773009  | -3.219433 |
| 76  | 6 | 0 | 2.939768  | 0.109170  | 3.261486  | 21 | 6  | 0 | 1.777241  | 3.496010  | -1.738325 |
| 77  | 6 | 0 | 5.123391  | 1.316939  | 2.770126  | 22 | 6  | 0 | 1.183847  | 2.756797  | -0.701887 |
| 78  | 1 | 0 | 3.262721  | 1.606796  | 1.775061  | 23 | 6  | 0 | 3.003108  | 3.116459  | -2.270036 |
| 79  | 1 | 0 | 3.452500  | -0.728421 | 3.750248  | 24 | 1  | 0 | 3.472228  | 3.697343  | -3.060272 |
| 80  | 1 | 0 | 2.001164  | -0.260902 | 2.839339  | 25 | 6  | 0 | 1.778807  | 1.563960  | -0.288440 |
| 81  | 1 | 0 | 5.728552  | 1.814528  | 2.003855  | 26 | 8  | 0 | -1.165189 | 0.666661  | -0.503793 |
| 82  | 1 | 0 | 5.737140  | 0.526334  | 3.218071  | 27 | 8  | 0 | 1.135198  | 0.789036  | 0.679528  |
| 83  | 1 | 0 | 2.699228  | 0.844483  | 4.039279  | 28 | 15 | 0 | -0.042355 | -0.262124 | 0.231377  |
| 84  | 1 | 0 | 4.900043  | 2.049148  | 3.555786  | 29 | 8  | 0 | 0.438072  | -1.256415 | -0.790788 |
| 85  | 1 | 0 | 2.803997  | -1.618139 | -4.492840 | 30 | 8  | 0 | -0.577606 | -0.792730 | 1.561011  |
| 86  | 1 | 0 | 4.821638  | -0.118477 | -4.668392 | 31 | 6  | 0 | -3.165721 | 1.347810  | 0.687991  |
| 87  | 1 | 0 | -2.511170 | -1.811322 | 4.343833  | 32 | 6  | 0 | 3.029489  | 1.158065  | -0.797907 |
| 88  | 1 | 0 | -4.603506 | -0.486641 | 4.697697  | 33 | 6  | 0 | -3.887871 | 0.070501  | 0.370278  |
| 89  | 1 | 0 | -5.446859 | 2.244189  | -3.211670 | 34 | 6  | 0 | -4.222512 | -0.244549 | -0.972449 |
| 90  | 1 | 0 | -3.247852 | 1.280676  | -4.035933 | 35 | 6  | 0 | -4.307129 | -0.800575 | 1.405464  |
| 91  | 6 | 0 | -5.776238 | -3.717453 | -0.767001 | 36 | 6  | 0 | -4.939903 | -1.412822 | -1.238925 |
| 92  | 6 | 0 | -4.878092 | -4.907283 | -0.351671 | 37 | 6  | 0 | -5.034075 | -1.953613 | 1.076248  |
| 93  | 1 | 0 | -4.703241 | -4.927295 | 0.728700  | 38 | 6  | 0 | -5.361210 | -2.293372 | -0.236622 |
| 94  | 1 | 0 | -5.355967 | -5.855707 | -0.627935 | 39 | 1  | 0 | -5.186069 | -1.634529 | -2.273618 |
| 95  | 1 | 0 | -3.898359 | -4.858582 | -0.837937 | 40 | 1  | 0 | -5.345446 | -2.601957 | 1.886922  |
| 96  | 6 | 0 | -6.068210 | -3.842096 | -2.274583 | 41 | 6  | 0 | 3.628886  | 1.975403  | -1.770896 |
| 97  | 1 | 0 | -6.749894 | -3.059748 | -2.627249 | 42 | 1  | 0 | 4.602093  | 1.685501  | -2.154457 |
| 98  | 1 | 0 | -5.150555 | -3.790220 | -2.871975 | 43 | 6  | 0 | 3.777329  | -0.062659 | -0.339479 |
| 99  | 1 | 0 | -6.543067 | -4.808263 | -2.480277 | 44 | 6  | 0 | 3.977733  | -1.153502 | -1.217067 |
| 100 | 6 | 0 | -7.121682 | -3.806109 | -0.007331 | 45 | 6  | 0 | 4.409899  | -0.066504 | 0.930594  |
| 101 | 1 | 0 | -7.629113 | -4.752475 | -0.233485 | 46 | 6  | 0 | 4.809906  | -2.209130 | -0.812151 |
| 102 | 1 | 0 | -6.976382 | -3.754680 | 1.076920  | 47 | 6  | 0 | 5.225813  | -1.145801 | 1.279965  |
| 103 | 1 | 0 | -7.789137 | -2.985087 | -0.293946 | 48 | 6  | 0 | 5.456600  | -2.231658 | 0.424345  |
| 104 | 6 | 0 | 5.965550  | -3.576805 | 0.736246  | 49 | 1  | 0 | 4.961277  | -3.026842 | -1.507199 |
| 105 | 6 | 0 | 7.322822  | -3.153382 | 1.347706  | 50 | 1  | 0 | 5.722450  | -1.122614 | 2.245125  |
| 106 | 1 | 0 | 7.189761  | -2.528473 | 2.236874  | 51 | 6  | 0 | 3.369372  | -1.214399 | -2.621161 |
| 107 | 1 | 0 | 7.903688  | -4.036476 | 1.642218  | 52 | 6  | 0 | 4.446868  | -0.985931 | -3.702408 |
| 108 | 1 | 0 | 7.915413  | -2.581948 | 0.624264  | 53 | 6  | 0 | 2.621872  | -2.531581 | -2.901580 |
| 109 | 6 | 0 | 6.249699  | -4.497128 | -0.466019 | 54 | 1  | 0 | 2.632348  | -0.411435 | -2.703110 |
| 110 | 1 | 0 | 5.325179  | -4.846343 | -0.940427 | 55 | 1  | 0 | 5.203024  | -1.780372 | -3.680062 |
| 111 | 1 | 0 | 6.855202  | -3.996219 | -1.229640 | 56 | 1  | 0 | 4.967459  | -0.031916 | -3.569301 |
| 112 | 1 | 0 | 6.805416  | -5.381091 | -0.132534 | 57 | 1  | 0 | 1.819670  | -2.686235 | -2.178066 |
| 113 | 6 | 0 | 5.169283  | -4.389141 | 1.784427  | 58 | 1  | 0 | 3.291773  | -3.399795 | -2.881921 |
| 114 | 1 | 0 | 5.730580  | -5.283000 | 2.083794  | 59 | 6  | 0 | 4.318350  | 1.131436  | 1.878659  |
| 115 | 1 | 0 | 4.966618  | -3.804824 | 2.687615  | 60 | 6  | 0 | 4.186287  | 0.745981  | 3.362029  |
| 116 | 1 | 0 | 4.204841  | -4.714779 | 1.376749  | 61 | 6  | 0 | 5.525088  | 2.070155  | 1.669317  |
|     |   |   |           |           |           | 62 | 1  | 0 | 3.420085  | 1.698278  | 1.621993  |
|     |   |   |           |           |           | 63 | 1  | 0 | 5.092786  | 0.267940  | 3.751389  |
|     |   |   |           |           |           | 64 | 1  | 0 | 3.346445  | 0.063686  | 3.529887  |
|     |   |   |           |           |           | 65 | 1  | 0 | 5.583213  | 2.415406  | 0.631632  |
|     |   |   |           |           |           | 66 | 1  | 0 | 6.465169  | 1.557274  | 1.906674  |
|     |   |   |           |           |           | 67 | 6  | 0 | -3.886352 | 0.667177  | -2.154063 |
|     |   |   |           |           |           | 68 | 6  | 0 | -3.017913 | -0.042650 | -3.210107 |

-----

**Phosphate in S-syn**  
B3LYP/6-31+G(d); E(RB3LYP) = -2547.09677777 Hartree

-----

| Center Number | Atomic Number | Atomic Type | Coordinates (Angstroms) |           |           |
|---------------|---------------|-------------|-------------------------|-----------|-----------|
|               |               |             | X                       | Y         | Z         |
| 67            | 6             | O           | -3.886352               | 0.667177  | -2.154063 |
| 68            | 6             | O           | -3.017913               | -0.042650 | -3.210107 |

|     |   |   |           |           |           |    |    |   |           |           |           |
|-----|---|---|-----------|-----------|-----------|----|----|---|-----------|-----------|-----------|
| 69  | 6 | 0 | -5.166506 | 1.249345  | -2.787146 | 14 | 1  | 0 | -0.993817 | 5.421990  | -0.859148 |
| 70  | 1 | 0 | -3.308918 | 1.516106  | -1.781098 | 15 | 6  | 0 | 0.339949  | 4.490210  | 1.290343  |
| 71  | 1 | 0 | -3.552538 | -0.878145 | -3.678109 | 16 | 1  | 0 | 0.889250  | 3.861461  | 2.000511  |
| 72  | 1 | 0 | -2.098072 | -0.431300 | -2.764274 | 17 | 1  | 0 | 0.978054  | 5.342198  | 1.036289  |
| 73  | 1 | 0 | -5.763382 | 1.793360  | -2.046323 | 18 | 6  | 0 | -1.018829 | 4.898558  | 1.898185  |
| 74  | 1 | 0 | -5.800385 | 0.462190  | -3.212383 | 19 | 1  | 0 | -1.390591 | 5.833759  | 1.456026  |
| 75  | 6 | 0 | -4.016222 | -0.544605 | 2.886615  | 20 | 1  | 0 | -0.965967 | 5.062663  | 2.980663  |
| 76  | 6 | 0 | -5.287383 | -0.104982 | 3.643124  | 21 | 6  | 0 | -1.900767 | 3.724263  | 1.534042  |
| 77  | 6 | 0 | -3.394731 | -1.764729 | 3.592233  | 22 | 6  | 0 | -1.278497 | 2.920042  | 0.566082  |
| 78  | 1 | 0 | -3.284828 | 0.265062  | 2.952530  | 23 | 6  | 0 | -3.153336 | 3.388782  | 2.034539  |
| 79  | 1 | 0 | -6.046111 | -0.896986 | 3.625639  | 24 | 1  | 0 | -3.648405 | 4.021790  | 2.766928  |
| 80  | 1 | 0 | -5.740895 | 0.791345  | 3.207228  | 25 | 6  | 0 | -1.869545 | 1.711290  | 0.203897  |
| 81  | 1 | 0 | -2.525627 | -2.138985 | 3.048582  | 26 | 6  | 0 | -3.768617 | 2.218776  | 1.588996  |
| 82  | 1 | 0 | -4.113441 | -2.587128 | 3.695432  | 27 | 1  | 0 | -4.754827 | 1.956598  | 1.959937  |
| 83  | 1 | 0 | 2.169511  | -2.494143 | -3.899940 | 28 | 8  | 0 | 1.054563  | 0.764547  | 0.538200  |
| 84  | 1 | 0 | 3.992751  | -0.985775 | -4.700781 | 29 | 8  | 0 | -1.204755 | 0.882543  | -0.697222 |
| 85  | 1 | 0 | 5.447675  | 2.952170  | 2.317162  | 30 | 15 | 0 | -0.076441 | -0.182370 | -0.167796 |
| 86  | 1 | 0 | 4.014718  | 1.645218  | 3.965516  | 31 | 8  | 0 | -0.592126 | -1.087826 | 0.922611  |
| 87  | 1 | 0 | -2.742982 | 0.658213  | -4.008242 | 32 | 8  | 0 | 0.456309  | -0.814572 | -1.447227 |
| 88  | 1 | 0 | -4.911963 | 1.944862  | -3.596484 | 33 | 6  | 0 | 3.059497  | 1.338971  | -0.688862 |
| 89  | 1 | 0 | -3.070148 | -1.488395 | 4.602401  | 34 | 6  | 0 | -3.135367 | 1.335872  | 0.699284  |
| 90  | 1 | 0 | -5.054181 | 0.110793  | 4.693194  | 35 | 6  | 0 | 3.741561  | 0.051552  | -0.324247 |
| 91  | 6 | 0 | 6.423066  | -3.355699 | 0.845608  | 36 | 6  | 0 | 4.114184  | -0.200227 | 1.021084  |
| 92  | 6 | 0 | 5.944710  | -4.000834 | 2.167160  | 37 | 6  | 0 | 4.096734  | -0.887532 | -1.323560 |
| 93  | 1 | 0 | 6.649499  | -4.776729 | 2.490822  | 38 | 6  | 0 | 4.822793  | -1.365182 | 1.325426  |
| 94  | 1 | 0 | 5.863246  | -3.267101 | 2.975773  | 39 | 6  | 0 | 4.811429  | -2.038331 | -0.957663 |
| 95  | 1 | 0 | 4.962609  | -4.470903 | 2.039372  | 40 | 6  | 0 | 5.194269  | -2.305744 | 0.358251  |
| 96  | 6 | 0 | 6.530606  | -4.468192 | -0.214723 | 41 | 1  | 0 | 5.109862  | -1.530346 | 2.360134  |
| 97  | 1 | 0 | 5.562202  | -4.944564 | -0.406060 | 42 | 1  | 0 | 5.082269  | -2.735266 | -1.742563 |
| 98  | 1 | 0 | 6.917793  | -4.088751 | -1.166898 | 43 | 6  | 0 | -3.799593 | 0.045226  | 0.320719  |
| 99  | 1 | 0 | 7.219240  | -5.246151 | 0.134361  | 44 | 6  | 0 | -4.043412 | -0.949980 | 1.304161  |
| 100 | 6 | 0 | 7.834723  | -2.756648 | 1.057070  | 45 | 6  | 0 | -4.226292 | -0.179548 | -1.008038 |
| 101 | 1 | 0 | 7.837380  | -1.988297 | 1.837222  | 46 | 6  | 0 | -4.680184 | -2.133442 | 0.922787  |
| 102 | 1 | 0 | 8.542684  | -3.539866 | 1.355703  | 47 | 6  | 0 | -4.847645 | -1.393943 | -1.334381 |
| 103 | 1 | 0 | 8.205700  | -2.296449 | 0.134245  | 48 | 6  | 0 | -5.082827 | -2.396676 | -0.391419 |
| 104 | 6 | 0 | -6.147570 | -3.564638 | -0.606032 | 49 | 1  | 0 | -4.859582 | -2.883840 | 1.686920  |
| 105 | 6 | 0 | -7.456865 | -3.171816 | -1.330929 | 50 | 1  | 0 | -5.168732 | -1.539004 | -2.360119 |
| 106 | 1 | 0 | -7.260793 | -2.603078 | -2.245730 | 51 | 6  | 0 | 3.767539  | -0.693345 | -2.806565 |
| 107 | 1 | 0 | -8.024425 | -4.068428 | -1.610169 | 52 | 6  | 0 | 5.032889  | -0.344834 | -3.618590 |
| 108 | 1 | 0 | -8.091742 | -2.555100 | -0.684406 | 53 | 6  | 0 | 3.072126  | -1.914937 | -3.436267 |
| 109 | 6 | 0 | -5.288599 | -4.444812 | -1.544843 | 54 | 1  | 0 | 3.069743  | 0.143495  | -2.890090 |
| 110 | 1 | 0 | -4.352536 | -4.738992 | -1.055971 | 55 | 1  | 0 | 5.756012  | -1.169317 | -3.592933 |
| 111 | 1 | 0 | -5.832873 | -5.357044 | -1.820086 | 56 | 1  | 0 | 5.538351  | 0.545913  | -3.231542 |
| 112 | 1 | 0 | -5.027208 | -3.919659 | -2.469147 | 57 | 1  | 0 | 2.165326  | -2.180682 | -2.889650 |
| 113 | 6 | 0 | -6.520788 | -4.405770 | 0.629381  | 58 | 1  | 0 | 3.728804  | -2.793007 | -3.466132 |
| 114 | 1 | 0 | -5.632683 | -4.743156 | -1.176107 | 59 | 6  | 0 | 3.824345  | 0.775692  | 2.162624  |
| 115 | 1 | 0 | -7.157702 | -3.848261 | 1.325468  | 60 | 6  | 0 | 2.952018  | 0.132825  | 3.260949  |
| 116 | 1 | 0 | -7.075376 | -5.297790 | 0.315915  | 61 | 6  | 0 | 5.128177  | 1.351914  | 2.750625  |

**Phosphate in S-re**

B3LYP/6-31+G(d); E(RB3LYP) = -2547.09985916 Hartree

| Center Number | Atomic Number | Atomic Type | Coordinates (Angstroms) |          |           |
|---------------|---------------|-------------|-------------------------|----------|-----------|
|               |               |             | X                       | Y        | Z         |
| 1             | 6             | 0           | 1.201975                | 2.920506 | -0.522736 |
| 2             | 6             | 0           | 1.767520                | 1.678367 | -0.237103 |
| 3             | 6             | 0           | 3.730225                | 2.277984 | -1.488909 |
| 4             | 6             | 0           | 3.130459                | 3.471917 | -1.890141 |
| 5             | 6             | 0           | 1.862375                | 3.782094 | -1.413832 |
| 6             | 1             | 0           | 4.737496                | 2.047068 | -1.820355 |
| 7             | 1             | 0           | 3.654898                | 4.148514 | -2.560511 |
| 8             | 6             | 0           | 1.003358                | 4.988763 | -1.725696 |
| 9             | 1             | 0           | 1.384029                | 5.893061 | -1.230432 |
| 10            | 1             | 0           | 0.970027                | 5.210093 | -2.798800 |
| 11            | 6             | 0           | -0.032404               | 3.624714 | 0.037805  |
| 12            | 6             | 0           | -0.372264               | 4.573009 | -1.160340 |
| 13            | 1             | 0           | -0.927295               | 4.002396 | -1.913704 |

|     |   |   |           |           |           |    |    |   |           |           |           |
|-----|---|---|-----------|-----------|-----------|----|----|---|-----------|-----------|-----------|
| 83  | 1 | 0 | -2.546909 | -1.749357 | 4.370220  | 28 | 15 | 0 | 0.000228  | -0.231725 | 0.127460  |
| 84  | 1 | 0 | -4.648991 | -0.430190 | 4.698315  | 29 | 8  | 0 | -0.558610 | -0.927577 | 1.371782  |
| 85  | 1 | 0 | -3.192131 | 1.196643  | -4.056337 | 30 | 8  | 0 | 0.581529  | -1.108092 | -0.952487 |
| 86  | 1 | 0 | -5.399775 | 2.187739  | -3.279894 | 31 | 6  | 0 | 3.095640  | 1.291100  | -0.583074 |
| 87  | 1 | 0 | 2.789488  | -1.687943 | -4.471628 | 32 | 6  | 0 | -3.196062 | 1.342109  | 0.506983  |
| 88  | 1 | 0 | 4.776521  | -0.158080 | -4.668728 | 33 | 6  | 0 | 3.804432  | 0.024322  | -0.198294 |
| 89  | 1 | 0 | 4.902618  | 2.093438  | 3.526827  | 34 | 6  | 0 | 4.221519  | -0.203930 | 1.132603  |
| 90  | 1 | 0 | 2.714394  | 0.879122  | 4.034377  | 35 | 6  | 0 | 4.187780  | -0.898152 | -1.209876 |
| 91  | 6 | 0 | 6.019661  | -3.542555 | 0.760837  | 36 | 6  | 0 | 5.022938  | -1.318749 | 1.420098  |
| 92  | 6 | 0 | 6.272123  | -4.493732 | -0.424403 | 37 | 6  | 0 | 5.000154  | -1.980768 | -0.865534 |
| 93  | 1 | 0 | 6.847004  | -4.010068 | -1.221973 | 38 | 6  | 0 | 5.447640  | -2.216689 | 0.439187  |
| 94  | 1 | 0 | 6.846280  | -5.363699 | -0.085661 | 39 | 1  | 0 | 5.340633  | -1.459693 | 2.447348  |
| 95  | 1 | 0 | 5.335038  | -4.863160 | -0.857866 | 40 | 1  | 0 | 5.300640  | -2.661367 | -1.656756 |
| 96  | 6 | 0 | 5.280575  | -4.336593 | 1.863288  | 41 | 6  | 0 | -3.910928 | 2.332049  | 1.202754  |
| 97  | 1 | 0 | 5.106555  | -3.730875 | 2.758217  | 42 | 1  | 0 | -4.940996 | 2.124391  | 1.475682  |
| 98  | 1 | 0 | 4.305969  | -4.690285 | 1.507319  | 43 | 6  | 0 | -3.865140 | 0.029517  | 0.227055  |
| 99  | 1 | 0 | 5.869423  | -5.212148 | 2.163543  | 44 | 6  | 0 | -4.324711 | -0.770859 | 1.302527  |
| 100 | 6 | 0 | 7.392459  | -3.079410 | 1.305722  | 45 | 6  | 0 | -4.127898 | -0.384833 | -1.103623 |
| 101 | 1 | 0 | 7.999135  | -3.943648 | 1.604224  | 46 | 6  | 0 | -5.026130 | -1.953797 | 1.023038  |
| 102 | 1 | 0 | 7.947089  | -2.520871 | 0.543172  | 47 | 6  | 0 | -4.831696 | -1.572359 | -1.319516 |
| 103 | 1 | 0 | 7.281640  | -2.429432 | 2.179911  | 48 | 6  | 0 | -5.305579 | -2.378385 | -0.277671 |
| 104 | 6 | 0 | -5.772580 | -3.730213 | -0.733592 | 49 | 1  | 0 | -5.374600 | -2.543768 | 1.863264  |
| 105 | 6 | 0 | -6.047467 | -3.878902 | -2.242204 | 50 | 1  | 0 | -5.037751 | -1.861953 | -2.346250 |
| 106 | 1 | 0 | -6.520042 | -4.848226 | -2.438106 | 51 | 6  | 0 | 3.764943  | -0.766643 | -2.677520 |
| 107 | 1 | 0 | -6.724864 | -3.102184 | -2.614853 | 52 | 6  | 0 | 4.973952  | -0.496476 | -3.596320 |
| 108 | 1 | 0 | -5.123074 | -3.836051 | -2.829885 | 53 | 6  | 0 | 2.984293  | -1.999334 | -3.174297 |
| 109 | 6 | 0 | -4.878073 | -4.912476 | -0.289791 | 54 | 1  | 0 | 3.086835  | 0.085478  | -2.762993 |
| 110 | 1 | 0 | -3.893127 | -4.868392 | -0.766081 | 55 | 1  | 0 | 5.677289  | -1.337933 | -3.589437 |
| 111 | 1 | 0 | -4.715604 | -4.915421 | 0.792748  | 56 | 1  | 0 | 5.528844  | 0.397175  | -3.290319 |
| 112 | 1 | 0 | -5.350838 | -5.865972 | -0.557155 | 57 | 1  | 0 | 2.073069  | -2.138412 | -2.588858 |
| 113 | 6 | 0 | -7.126303 | -3.808242 | 0.012310  | 58 | 1  | 0 | 3.584217  | -2.915496 | -3.117064 |
| 114 | 1 | 0 | -7.630983 | -4.758107 | -0.205213 | 59 | 6  | 0 | 3.889526  | 0.751070  | 2.279573  |
| 115 | 1 | 0 | -6.993223 | -3.740286 | 1.097213  | 60 | 6  | 0 | 3.060202  | 0.062293  | 3.380083  |
| 116 | 1 | 0 | -7.790647 | -2.991911 | -0.294119 | 61 | 6  | 0 | 5.162035  | 1.396999  | 2.863441  |

**Phosphate in *S-anti***

B3LYP/6-31+G(d); E(RB3LYP) = -2547.09578230 Hartree

| Center Number | Atomic Number | Atomic Type | Coordinates (Angstroms) |           |           |
|---------------|---------------|-------------|-------------------------|-----------|-----------|
|               |               |             | X                       | Y         | Z         |
| 1             | 6             | 0           | 1.224126                | 2.861289  | -0.571806 |
| 2             | 6             | 0           | 1.801773                | 1.660156  | -0.158853 |
| 3             | 6             | 0           | 3.769707                | 2.177100  | -1.441892 |
| 4             | 6             | 0           | 3.173101                | 3.333185  | -1.938996 |
| 5             | 6             | 0           | 1.890348                | 3.657817  | -1.517432 |
| 6             | 1             | 0           | 4.778821                | 1.920675  | -1.748513 |
| 7             | 1             | 0           | 3.704164                | 3.962818  | -2.648655 |
| 8             | 6             | 0           | 1.021416                | 4.815501  | -1.955222 |
| 9             | 1             | 0           | 1.360759                | 5.764076  | -1.515709 |
| 10            | 1             | 0           | 1.027556                | 4.953656  | -3.042588 |
| 11            | 6             | 0           | -0.047736               | 3.574577  | -0.122861 |
| 12            | 6             | 0           | -0.362950               | 4.406892  | -1.413029 |
| 13            | 1             | 0           | -0.867581               | 3.755523  | -2.135849 |
| 14            | 1             | 0           | -1.022591               | 5.256526  | -1.212878 |
| 15            | 6             | 0           | 0.236420                | 4.556978  | 1.061889  |
| 16            | 1             | 0           | 0.739103                | 4.004588  | 1.863997  |
| 17            | 1             | 0           | 0.886011                | 5.387996  | 0.770649  |
| 18            | 6             | 0           | -1.164269               | 5.006210  | 1.529446  |
| 19            | 1             | 0           | -1.501639               | 5.900598  | 0.987311  |
| 20            | 1             | 0           | -1.194072               | 5.257235  | 2.596120  |
| 21            | 6             | 0           | -2.018442               | 3.800710  | 1.201572  |
| 22            | 6             | 0           | -1.313087               | 2.894008  | 0.392814  |
| 23            | 6             | 0           | -3.325210               | 3.535267  | 1.591052  |
| 24            | 1             | 0           | -3.886403               | 4.250658  | 2.187192  |
| 25            | 6             | 0           | -1.873509               | 1.645083  | 0.122631  |
| 26            | 8             | 0           | 1.088247                | 0.838833  | 0.718651  |
| 27            | 8             | 0           | -1.132724               | 0.698522  | -0.588104 |
| 28            | 15            | 0           | 0.000228                | -0.231725 | 0.127460  |
| 29            | 8             | 0           | -0.558610               | -0.927577 | 1.371782  |
| 30            | 8             | 0           | 0.581529                | -1.108092 | -0.952487 |
| 31            | 6             | 0           | 3.095640                | 1.291100  | -0.583074 |
| 32            | 6             | 0           | -3.196062               | 1.342109  | 0.506983  |
| 33            | 6             | 0           | 3.804432                | 0.024322  | -0.198294 |
| 34            | 6             | 0           | 4.221519                | -0.203930 | 1.132603  |
| 35            | 6             | 0           | 4.187780                | -0.898152 | -1.209876 |
| 36            | 6             | 0           | 5.022938                | -1.318749 | 1.420098  |
| 37            | 6             | 0           | 5.000154                | -1.980768 | -0.865534 |
| 38            | 6             | 0           | 5.447640                | -2.216689 | 0.439187  |
| 39            | 1             | 0           | 5.340633                | -1.459693 | 2.447348  |
| 40            | 1             | 0           | 5.300640                | -2.661367 | -1.656756 |
| 41            | 6             | 0           | -3.910928               | 2.332049  | 1.202754  |
| 42            | 1             | 0           | -4.940996               | 2.124391  | 1.475682  |
| 43            | 6             | 0           | -3.865140               | 0.029517  | 0.227055  |
| 44            | 6             | 0           | -4.324711               | -0.770859 | 1.302527  |
| 45            | 6             | 0           | -4.127898               | -0.384833 | -1.103623 |
| 46            | 6             | 0           | -5.026130               | -1.953797 | 1.023038  |
| 47            | 6             | 0           | -4.831696               | -1.572359 | -1.319516 |
| 48            | 6             | 0           | -5.305579               | -2.378385 | -0.277671 |
| 49            | 1             | 0           | -5.374600               | -2.543768 | 1.863264  |
| 50            | 1             | 0           | -5.037751               | -1.861953 | -2.346250 |
| 51            | 6             | 0           | 3.764943                | -0.766643 | -2.677520 |
| 52            | 6             | 0           | 4.973952                | -0.496476 | -3.596320 |
| 53            | 6             | 0           | 2.984293                | -1.999334 | -3.174297 |
| 54            | 1             | 0           | 3.086835                | 0.085478  | -2.762993 |
| 55            | 1             | 0           | 5.677289                | -1.337933 | -3.589437 |
| 56            | 1             | 0           | 5.528844                | 0.397175  | -3.290319 |
| 57            | 1             | 0           | 2.073069                | -2.138412 | -2.588858 |
| 58            | 1             | 0           | 3.584217                | -2.915496 | -3.117064 |
| 59            | 6             | 0           | 3.889526                | 0.751070  | 2.279573  |
| 60            | 6             | 0           | 3.060202                | 0.062293  | 3.380083  |
| 61            | 6             | 0           | 5.162035                | 1.396999  | 2.863441  |
| 62            | 1             | 0           | 3.279266                | 1.564612  | 1.881067  |
| 63            | 1             | 0           | 3.618608                | -0.755003 | 3.853134  |
| 64            | 1             | 0           | 2.130998                | -0.345894 | 2.972073  |
| 65            | 1             | 0           | 5.732511                | 1.919926  | 2.087525  |
| 66            | 1             | 0           | 5.824422                | 0.650942  | 3.318308  |
| 67            | 6             | 0           | -3.740447               | 0.448223  | -2.326496 |
| 68            | 6             | 0           | -2.810535               | -0.319988 | -3.284642 |
| 69            | 6             | 0           | -4.991714               | 0.967899  | -3.063394 |
| 70            | 1             | 0           | -3.191861               | 1.327672  | -1.982556 |
| 71            | 1             | 0           | -3.306490               | -1.202026 | -3.708412 |
| 72            | 1             | 0           | -1.901464               | -0.647464 | -2.772257 |
| 73            | 1             | 0           | -5.634351               | 1.549319  | -2.392630 |
| 74            | 1             | 0           | -5.592356               | 0.145934  | -3.470783 |
| 75            | 6             | 0           | -4.123950               | -0.399361 | 2.775781  |
| 76            | 6             | 0           | -5.471447               | -0.126429 | 3.474873  |
| 77            | 6             | 0           | -3.318787               | -1.458182 | 3.548821  |
| 78            | 1             | 0           | -3.541103               | 0.522433  | 2.820023  |
| 79            | 1             | 0           | -6.093933               | -1.028297 | 3.514271  |
| 80            | 1             | 0           | -6.049007               | 0.648282  | 2.957640  |
| 81            | 1             | 0           | -2.322238               | -1.570690 | 3.114800  |
| 82            | 1             | 0           | -3.812168               | -2.436357 | 3.550623  |
| 83            | 1             | 0           | -2.515394               | 0.323542  | -4.122539 |
| 84            | 1             | 0           | -4.701406               | 1.613870  | -3.901049 |
| 85            | 1             | 0           | -3.198048               | -1.149079 | 4.594564  |
| 86            | 1             | 0           | -5.305404               | 0.206599  | 4.506590  |
| 87            | 1             | 0           | 4.642465                | -0.350135 | -4.631582 |
| 88            | 1             | 0           | 2.694448                | -1.859824 | -4.223202 |
| 89            | 1             | 0           | 4.899233                | 2.124784  | 3.640996  |
| 90            | 1             | 0           | 2.799541                | 0.781598  | 4.166308  |
| 91            | 6             | 0           | -6.130480               | -3.641085 | -0.591821 |
| 92            | 6             | 0           | -6.564874               | -4.392855 | 0.680800  |
| 93            | 1             | 0           | -5.706368               | -4.717848 | 1.279433  |
| 94            | 1             | 0           | -7.207217               | -3.775096 | 1.318355  |
| 95            | 1             | 0           | -7.136208               | -5.286841 | 0.405176  |
| 96            | 6             | 0           | -7.408132               | -3.234959 | -1.365789 |

|     |   |   |           |           |           |    |   |   |           |           |           |
|-----|---|---|-----------|-----------|-----------|----|---|---|-----------|-----------|-----------|
| 97  | 1 | 0 | -7.170338 | -2.736672 | -2.311230 | 42 | 1 | 0 | 5.380655  | -2.671301 | -1.695021 |
| 98  | 1 | 0 | -8.013528 | -4.120392 | -1.596806 | 43 | 6 | 0 | -3.850275 | 0.016567  | 0.311441  |
| 99  | 1 | 0 | -8.022117 | -2.548407 | -0.772006 | 44 | 6 | 0 | -4.220654 | -0.903010 | 1.324203  |
| 100 | 6 | 0 | -5.299355 | -4.609788 | -1.464907 | 45 | 6 | 0 | -4.276860 | -0.217264 | -1.020796 |
| 101 | 1 | 0 | -4.976069 | -4.142639 | -2.400751 | 46 | 6 | 0 | -5.021553 | -2.005144 | 0.988356  |
| 102 | 1 | 0 | -4.401213 | -4.944216 | -0.931754 | 47 | 6 | 0 | -5.056297 | -1.344012 | -1.298189 |
| 103 | 1 | 0 | -5.889224 | -5.498618 | -1.720976 | 48 | 6 | 0 | -5.461007 | -2.253391 | -0.313952 |
| 104 | 6 | 0 | 6.412779  | -3.383057 | 0.726431  | 49 | 1 | 0 | -5.309184 | -2.681753 | 1.785650  |
| 105 | 6 | 0 | 5.861065  | -4.703919 | 0.140764  | 50 | 1 | 0 | -5.381181 | -1.497575 | -2.323479 |
| 106 | 1 | 0 | 5.745174  | -4.655540 | -0.946425 | 51 | 6 | 0 | -3.978514 | 0.745428  | -2.171214 |
| 107 | 1 | 0 | 6.546762  | -5.531216 | 0.361612  | 52 | 6 | 0 | -3.169093 | 0.072361  | -3.296001 |
| 108 | 1 | 0 | 4.882263  | -4.950498 | 0.565990  | 53 | 6 | 0 | -5.273593 | 1.378324  | -2.719474 |
| 109 | 6 | 0 | 6.650359  | -3.592033 | 2.234563  | 54 | 1 | 0 | -3.369310 | 1.564493  | -1.783370 |
| 110 | 1 | 0 | 7.121774  | -2.719676 | 2.700262  | 55 | 1 | 0 | -3.728207 | -0.748950 | -3.760862 |
| 111 | 1 | 0 | 5.716133  | -3.798658 | 2.769940  | 56 | 1 | 0 | -2.223091 | -0.324806 | -2.916844 |
| 112 | 1 | 0 | 7.318727  | -4.446816 | 2.389569  | 57 | 1 | 0 | -5.831650 | 1.890054  | -1.927215 |
| 113 | 6 | 0 | 7.775976  | -3.071419 | 0.061635  | 58 | 1 | 0 | -5.937174 | 0.626092  | -3.162287 |
| 114 | 1 | 0 | 8.488325  | -3.886932 | 0.240446  | 59 | 6 | 0 | -3.801291 | -0.752374 | 2.790465  |
| 115 | 1 | 0 | 7.672964  | -2.944776 | -1.021399 | 60 | 6 | 0 | -5.015245 | -0.480188 | 3.702194  |
| 116 | 1 | 0 | 8.206296  | -2.148127 | 0.466022  | 61 | 6 | 0 | -3.010735 | -1.969969 | 3.307589  |

### Phosphate in S-si

B3LYP/6-31+G(d); E(RB3LYP) = -2547.09833394 Hartree

| Center Number | Atomic Number | Atomic Type | Coordinates (Angstroms) |           |           |
|---------------|---------------|-------------|-------------------------|-----------|-----------|
|               |               |             | X                       | Y         | Z         |
| 1             | 6             | 0           | 1.237528                | 2.829904  | -0.540548 |
| 2             | 6             | 0           | 1.811290                | 1.598954  | -0.222923 |
| 3             | 6             | 0           | 3.780377                | 2.204907  | -1.462486 |
| 4             | 6             | 0           | 3.172396                | 3.382285  | -1.895384 |
| 5             | 6             | 0           | 1.894788                | 3.683764  | -1.440669 |
| 6             | 1             | 0           | 4.795134                | 1.981337  | -1.774674 |
| 7             | 1             | 0           | 3.697539                | 4.052792  | -2.571206 |
| 8             | 6             | 0           | 1.025802                | 4.874982  | -1.781524 |
| 9             | 1             | 0           | 1.396184                | 5.793527  | -1.305074 |
| 10            | 1             | 0           | 0.994462                | 5.072181  | -2.859354 |
| 11            | 6             | 0           | -0.002168               | 3.534357  | 0.003229  |
| 12            | 6             | 0           | -0.347580               | 4.458330  | -1.212360 |
| 13            | 1             | 0           | -0.896082               | 3.869457  | -1.956362 |
| 14            | 1             | 0           | -0.977075               | 5.307118  | -0.927795 |
| 15            | 6             | 0           | 0.367946                | 4.424759  | 1.238529  |
| 16            | 1             | 0           | 0.916089                | 3.810140  | 1.961867  |
| 17            | 1             | 0           | 1.006827                | 5.271015  | 0.968311  |
| 18            | 6             | 0           | -0.991377               | 4.845172  | 1.834389  |
| 19            | 1             | 0           | -1.360454               | 5.773644  | 1.376315  |
| 20            | 1             | 0           | -0.943230               | 5.026072  | 2.914462  |
| 21            | 6             | 0           | -1.874176               | 3.667407  | 1.485545  |
| 22            | 6             | 0           | -1.248023               | 2.837509  | 0.541916  |
| 23            | 6             | 0           | -3.138131               | 3.358349  | 1.972656  |
| 24            | 1             | 0           | -3.638348               | 4.012636  | 2.682425  |
| 25            | 6             | 0           | -1.843527               | 1.624415  | 0.195862  |
| 26            | 6             | 0           | -3.760713               | 2.191358  | 1.534284  |
| 27            | 1             | 0           | -4.760369               | 1.953573  | 1.884393  |
| 28            | 8             | 0           | 1.090198                | 0.697825  | 0.562400  |
| 29            | 8             | 0           | -1.176064               | 0.771871  | -0.680924 |
| 30            | 15            | 0           | -0.024657               | -0.267069 | -0.156141 |
| 31            | 8             | 0           | -0.551703               | -1.129427 | 0.988749  |
| 32            | 8             | 0           | 0.510956                | -0.953340 | -1.383035 |
| 33            | 6             | 0           | 3.112835                | 1.268925  | -0.654522 |
| 34            | 6             | 0           | -3.125253               | 1.280006  | 0.673269  |
| 35            | 6             | 0           | 3.832891                | 0.006754  | -0.274168 |
| 36            | 6             | 0           | 4.213031                | -0.224344 | 1.068838  |
| 37            | 6             | 0           | 4.250276                | -0.909739 | -1.276754 |
| 38            | 6             | 0           | 5.000749                | -1.343109 | 1.378517  |
| 39            | 6             | 0           | 5.050117                | -1.996752 | -0.910273 |
| 40            | 6             | 0           | 5.453122                | -2.239785 | 0.490901  |
| 41            | 1             | 0           | 5.286962                | -1.487358 | 2.414315  |

|     |   |   |           |           |           |
|-----|---|---|-----------|-----------|-----------|
| 62  | 1 | 0 | -3.130927 | 0.106680  | 2.865501  |
| 63  | 1 | 0 | -5.711643 | -1.327458 | 3.704540  |
| 64  | 1 | 0 | -5.576302 | 0.404290  | 3.381332  |
| 65  | 1 | 0 | -2.102083 | -2.120988 | 2.720087  |
| 66  | 1 | 0 | -3.607767 | -2.889935 | 3.278847  |
| 67  | 6 | 0 | 3.884700  | -0.755899 | -2.756316 |
| 68  | 6 | 0 | 5.108896  | -0.352674 | -3.604759 |
| 69  | 6 | 0 | 3.247735  | -2.028819 | -3.345203 |
| 70  | 1 | 0 | 3.137751  | 0.037555  | -2.837998 |
| 71  | 1 | 0 | 5.879443  | -1.133040 | -3.579758 |
| 72  | 1 | 0 | 5.570582  | 0.575480  | -3.252666 |
| 73  | 1 | 0 | 2.384607  | -2.350907 | -2.760795 |
| 74  | 1 | 0 | 3.960657  | -2.861231 | -3.391117 |
| 75  | 6 | 0 | 3.862627  | 0.732838  | 2.209565  |
| 76  | 6 | 0 | 3.006124  | 0.054205  | 3.295326  |
| 77  | 6 | 0 | 5.129713  | 1.368328  | 2.816949  |
| 78  | 1 | 0 | 3.268323  | 1.551928  | 1.798838  |
| 79  | 1 | 0 | 3.540813  | -0.776355 | 3.772406  |
| 80  | 1 | 0 | 2.073082  | -0.330622 | 2.873189  |
| 81  | 1 | 0 | 5.720562  | 1.883093  | 2.050981  |
| 82  | 1 | 0 | 5.775455  | 0.617684  | 3.287828  |
| 83  | 1 | 0 | 2.908704  | -1.835258 | -4.369864 |
| 84  | 1 | 0 | 4.816600  | -0.207510 | -4.651874 |
| 85  | 1 | 0 | 4.857873  | 2.101265  | 3.586394  |
| 86  | 1 | 0 | 2.749639  | 0.774547  | 4.081941  |
| 87  | 1 | 0 | -4.688430 | -0.316362 | 4.736268  |
| 88  | 1 | 0 | -2.713194 | -1.806793 | 4.350736  |
| 89  | 1 | 0 | -2.939134 | 0.799876  | -4.084060 |
| 90  | 1 | 0 | -5.038630 | 2.113150  | -3.499136 |
| 91  | 6 | 0 | 6.392886  | -3.418977 | 0.727009  |
| 92  | 6 | 0 | 5.778449  | -4.746350 | 0.224782  |
| 93  | 1 | 0 | 5.581384  | -4.727866 | -0.851807 |
| 94  | 1 | 0 | 6.460661  | -5.582055 | 0.423532  |
| 95  | 1 | 0 | 4.831431  | -4.957609 | 0.735892  |
| 96  | 6 | 0 | 6.666777  | -3.563071 | 2.236184  |
| 97  | 1 | 0 | 7.165441  | -2.678406 | 2.647224  |
| 98  | 1 | 0 | 5.743772  | -3.727795 | 2.804412  |
| 99  | 1 | 0 | 7.323468  | -4.422602 | 2.413038  |
| 100 | 6 | 0 | 7.746184  | -3.188444 | 0.011413  |
| 101 | 1 | 0 | 8.437646  | -4.014183 | 0.221244  |
| 102 | 1 | 0 | 7.622815  | -3.121494 | -1.074577 |
| 103 | 1 | 0 | 8.213813  | -2.257740 | 0.351991  |
| 104 | 6 | 0 | -6.367879 | -3.442086 | -0.685428 |
| 105 | 6 | 0 | -5.677507 | -4.314359 | -1.760334 |
| 106 | 1 | 0 | -6.327255 | -5.149505 | -2.049758 |
| 107 | 1 | 0 | -5.446971 | -3.743025 | -2.665161 |
| 108 | 1 | 0 | -4.737952 | -4.735200 | -1.383068 |
| 109 | 6 | 0 | -6.688385 | -4.339661 | 0.525003  |
| 110 | 1 | 0 | -5.782327 | -4.772557 | 0.964689  |



|     |   |   |           |           |           |
|-----|---|---|-----------|-----------|-----------|
| 111 | 1 | 0 | -7.220219 | -3.791267 | 1.310655  |
| 112 | 1 | 0 | -7.330658 | -5.169783 | 0.209554  |
| 113 | 6 | 0 | -7.705011 | -2.904829 | -1.250389 |
| 114 | 1 | 0 | -8.366763 | -3.736066 | -1.524007 |
| 115 | 1 | 0 | -8.223204 | -2.287497 | -0.507735 |
| 116 | 1 | 0 | -7.551143 | -2.291847 | -2.144424 |

---

### 13. Screening of CPA Candidates by Calculation and their Structural Properties

#### Optimized structure of SPHENOL-derived CPA (S)-1ca

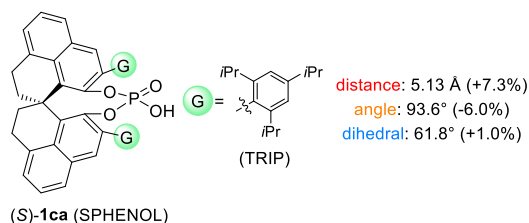

B3LYP/6-31G(d); E(RB3LYP) = -2776.21311781 Hartree  
 Zero-point correction= 1.055886 Hartree  
 Thermal correction to Energy= 1.113561 Hartree  
 Thermal correction to Enthalpy= 1.114505 Hartree  
 Thermal correction to Gibbs Free Energy= 0.964482 Hartree  
 Sum of electronic and zero-point Energies= -2775.157232 Hartree  
 Sum of electronic and thermal Energies= -2775.099557 Hartree  
 Sum of electronic and thermal Enthalpies= -2775.098613 Hartree  
 Sum of electronic and thermal Free Energies= -2775.248636 Hartree  
 The number of Imaginary frequencies = 0

| Center Number | Atomic Number | Atomic Type | Coordinates (Angstroms) |           |           |
|---------------|---------------|-------------|-------------------------|-----------|-----------|
|               |               |             | X                       | Y         | Z         |
| 1             | 6             | 0           | -2.113194               | -3.016592 | -1.479905 |
| 2             | 6             | 0           | -1.251833               | -2.242915 | -0.603885 |
| 3             | 6             | 0           | -1.746675               | -1.020179 | -0.181513 |
| 4             | 6             | 0           | -3.070687               | -0.539833 | -0.426848 |
| 5             | 6             | 0           | -3.885517               | -1.323620 | -1.206324 |
| 6             | 6             | 0           | -3.427933               | -2.529894 | -1.788182 |
| 7             | 6             | 0           | -1.720828               | -4.261820 | -2.064496 |
| 8             | 6             | 0           | -0.378390               | -4.869579 | -1.747808 |
| 9             | 6             | 0           | 0.600884                | -3.853000 | -1.175757 |
| 10            | 6             | 0           | -0.002379               | -2.980327 | -0.029511 |
| 11            | 6             | 0           | -0.639762               | -3.841363 | 1.110211  |
| 12            | 6             | 0           | 0.310776                | -4.862284 | 1.717271  |
| 13            | 6             | 0           | 1.613335                | -4.234537 | 2.133026  |
| 14            | 6             | 0           | 2.039099                | -3.004032 | 1.540431  |
| 15            | 6             | 0           | 1.253730                | -2.274113 | 0.561637  |
| 16            | 6             | 0           | -4.281789               | -3.262506 | -2.651635 |
| 17            | 6             | 0           | -3.865202               | -4.444667 | -3.215264 |
| 18            | 6             | 0           | -2.579642               | -4.934438 | -2.915503 |

|    |    |   |           |           |           |
|----|----|---|-----------|-----------|-----------|
| 19 | 6  | 0 | 3.325999  | -2.501591 | 1.931532  |
| 20 | 6  | 0 | 3.825711  | -1.315097 | 1.346237  |
| 21 | 6  | 0 | 3.093921  | -0.590712 | 0.437246  |
| 22 | 6  | 0 | 1.811446  | -1.108753 | 0.066477  |
| 23 | 6  | 0 | 2.405051  | -4.871276 | 3.071422  |
| 24 | 6  | 0 | 3.657508  | -4.358215 | 3.460262  |
| 25 | 6  | 0 | 4.110771  | -3.193561 | 2.889665  |
| 26 | 8  | 0 | -0.920005 | -0.146843 | 0.548333  |
| 27 | 8  | 0 | 1.127444  | -0.378432 | -0.909171 |
| 28 | 15 | 0 | 0.038678  | 0.723068  | -0.421827 |
| 29 | 8  | 0 | -0.538108 | 1.412951  | -1.588198 |
| 30 | 8  | 0 | 0.727688  | 1.609059  | 0.722953  |
| 31 | 6  | 0 | -3.584080 | 0.738214  | 0.173295  |
| 32 | 6  | 0 | 3.625422  | 0.695748  | -0.130660 |
| 33 | 6  | 0 | 3.856637  | 1.819307  | 0.718225  |
| 34 | 6  | 0 | 4.319951  | 3.011622  | 0.146075  |
| 35 | 6  | 0 | 4.586172  | 3.138826  | -1.219941 |
| 36 | 6  | 0 | 4.392118  | 2.014097  | -2.020404 |
| 37 | 6  | 0 | 3.921673  | 0.797402  | -1.512673 |
| 38 | 6  | 0 | -3.774938 | 0.827929  | 1.573727  |
| 39 | 6  | 0 | -4.306921 | 2.004259  | 2.112850  |
| 40 | 6  | 0 | -4.665683 | 3.094372  | 1.321030  |
| 41 | 6  | 0 | -4.480101 | 2.979812  | -0.058132 |
| 42 | 6  | 0 | -3.946459 | 1.832517  | -0.655465 |
| 43 | 6  | 0 | -3.477365 | -0.328094 | 2.529306  |
| 44 | 6  | 0 | -4.773500 | -0.872808 | 3.162771  |
| 45 | 6  | 0 | -2.451217 | 0.059183  | 3.610941  |
| 46 | 6  | 0 | -5.240195 | 4.357992  | 1.947804  |
| 47 | 6  | 0 | -6.672334 | 4.644559  | 1.458338  |
| 48 | 6  | 0 | -4.325005 | 5.576187  | 1.720726  |
| 49 | 6  | 0 | -3.807689 | 1.814848  | -2.179866 |
| 50 | 6  | 0 | -3.067862 | 3.050245  | -2.727560 |
| 51 | 6  | 0 | -5.187281 | 1.680544  | -2.858175 |
| 52 | 6  | 0 | 3.818612  | -0.390267 | -2.469432 |
| 53 | 6  | 0 | 5.223838  | -0.860065 | -2.899298 |
| 54 | 6  | 0 | 2.935018  | -0.091459 | -3.694948 |
| 55 | 6  | 0 | 3.686567  | 1.776740  | 2.243475  |
| 56 | 6  | 0 | 2.889474  | 2.962994  | 2.822656  |
| 57 | 6  | 0 | 5.066627  | 1.701914  | 2.932121  |
| 58 | 6  | 0 | 5.080236  | 4.448902  | -1.818581 |
| 59 | 6  | 0 | 4.039879  | 5.574671  | -1.664724 |
| 60 | 6  | 0 | 6.442940  | 4.870665  | -1.237108 |
| 61 | 1  | 0 | -4.907360 | -1.009422 | -1.395969 |
| 62 | 1  | 0 | -0.515805 | -5.695134 | -1.034417 |
| 63 | 1  | 0 | 0.047647  | -5.326970 | -2.649648 |
| 64 | 1  | 0 | 1.496615  | -4.367487 | -0.814741 |
| 65 | 1  | 0 | 0.930335  | -3.166724 | -1.965071 |
| 66 | 1  | 0 | -0.980279 | -3.147965 | 1.889122  |
| 67 | 1  | 0 | -1.532200 | -4.347312 | 0.733187  |
| 68 | 1  | 0 | -0.165467 | -5.347046 | 2.578630  |
| 69 | 1  | 0 | 0.508140  | -5.667101 | 0.994296  |
| 70 | 1  | 0 | -5.269794 | -2.861781 | -2.863526 |
| 71 | 1  | 0 | -4.515503 | -4.998606 | -3.886635 |
| 72 | 1  | 0 | -2.247104 | -5.869524 | -3.361455 |
| 73 | 1  | 0 | 4.816002  | -0.974333 | 1.632159  |
| 74 | 1  | 0 | 2.046209  | -5.797553 | 3.515012  |
| 75 | 1  | 0 | 4.254839  | -4.882865 | 4.200732  |
| 76 | 1  | 0 | 5.077170  | -2.777943 | 3.163804  |
| 77 | 1  | 0 | 1.523854  | 2.067824  | 0.391840  |
| 78 | 1  | 0 | 4.490027  | 3.865760  | 0.795606  |
| 79 | 1  | 0 | 4.617480  | 2.086682  | -3.081659 |
| 80 | 1  | 0 | -4.456057 | 2.070072  | 3.188500  |
| 81 | 1  | 0 | -4.756712 | 3.814126  | -0.697015 |
| 82 | 1  | 0 | -3.042684 | -1.149365 | 1.953002  |
| 83 | 1  | 0 | -5.485489 | -1.193379 | 2.393992  |
| 84 | 1  | 0 | -4.554815 | -1.734674 | 3.805331  |
| 85 | 1  | 0 | -5.268672 | -0.113942 | 3.779906  |
| 86 | 1  | 0 | -1.522822 | 0.419243  | 3.157982  |
| 87 | 1  | 0 | -2.214182 | -0.808456 | 4.239359  |

|     |   |   |           |           |           |     |   |   |           |           |           |
|-----|---|---|-----------|-----------|-----------|-----|---|---|-----------|-----------|-----------|
| 88  | 1 | 0 | -2.836346 | 0.846180  | 4.270124  | 107 | 1 | 0 | 2.827557  | -0.993889 | -4.308834 |
| 89  | 1 | 0 | -6.692410 | 4.844039  | 0.380350  | 108 | 1 | 0 | 3.373537  | 0.685065  | -4.332915 |
| 90  | 1 | 0 | -7.086895 | 5.523535  | 1.966827  | 109 | 1 | 0 | 3.134987  | 0.868971  | 2.500385  |
| 91  | 1 | 0 | -7.334650 | 3.793640  | 1.652099  | 110 | 1 | 0 | 1.882290  | 3.028265  | 2.401331  |
| 92  | 1 | 0 | -3.315739 | 5.388833  | 2.103068  | 111 | 1 | 0 | 2.782253  | 2.836541  | 3.906186  |
| 93  | 1 | 0 | -4.237735 | 5.814124  | 0.654021  | 112 | 1 | 0 | 3.393669  | 3.922049  | 2.658250  |
| 94  | 1 | 0 | -4.725463 | 6.461988  | 2.228825  | 113 | 1 | 0 | 5.661189  | 0.856453  | 2.570629  |
| 95  | 1 | 0 | -3.207670 | 0.944707  | -2.456480 | 114 | 1 | 0 | 4.948974  | 1.595752  | 4.017155  |
| 96  | 1 | 0 | -2.081654 | 3.143833  | -2.268942 | 115 | 1 | 0 | 5.646831  | 2.613344  | 2.744500  |
| 97  | 1 | 0 | -2.930144 | 2.946715  | -3.810848 | 116 | 1 | 0 | 3.860712  | 5.809927  | -0.608746 |
| 98  | 1 | 0 | -3.630333 | 3.976573  | -2.558822 | 117 | 1 | 0 | 4.388553  | 6.491405  | -2.154865 |
| 99  | 1 | 0 | -5.725288 | 0.785799  | -2.525617 | 118 | 1 | 0 | 3.080662  | 5.292380  | -2.111909 |
| 100 | 1 | 0 | -5.074921 | 1.621989  | -3.947747 | 119 | 1 | 0 | 6.371840  | 5.078980  | -0.162881 |
| 101 | 1 | 0 | -5.822450 | 2.546289  | -2.633766 | 120 | 1 | 0 | 7.194125  | 4.085488  | -1.376135 |
| 102 | 1 | 0 | 3.358328  | -1.223893 | -1.933606 | 121 | 1 | 0 | 6.805669  | 5.781456  | -1.728085 |
| 103 | 1 | 0 | 5.838052  | -1.124609 | -2.031189 | 122 | 1 | 0 | 5.221288  | 4.276666  | -2.894260 |
| 104 | 1 | 0 | 5.150188  | -1.742800 | -3.545848 | 123 | 1 | 0 | -5.292781 | 4.184452  | 3.031628  |
| 105 | 1 | 0 | 5.753572  | -0.079687 | -3.458423 |     |   |   |           |           |           |
| 106 | 1 | 0 | 1.936899  | 0.237703  | -3.392655 |     |   |   |           |           |           |

#### DFT calculation for all conformations of real system using SPHENOL-derived CPA (S)-1ca

| TS            | Orientation I | Orientation II | G <sup>‡</sup> (a.u.) | ΔΔG <sup>‡</sup> (kcal/mmol) |
|---------------|---------------|----------------|-----------------------|------------------------------|
| <i>R-anti</i> | up            | up             |                       |                              |
|               | up            | down           | -3428.311328          | -2.30                        |
|               | down          | up             |                       |                              |
|               | down          | down           | -3428.310477          | -1.76                        |

|               |      |      |              |      |
|---------------|------|------|--------------|------|
| <i>S-anti</i> | up   | up   | -3428.301208 | 4.05 |
|               | up   | down | -3428.302572 | 3.20 |
|               | down | up   | -3428.298938 | 5.48 |
|               | down | down | -3428.299655 | 5.03 |

|              |      |      |              |      |
|--------------|------|------|--------------|------|
| <i>S-syn</i> | up   | up   | -3428.305496 | 1.36 |
|              | up   | down | -3428.305311 | 1.48 |
|              | down | down | -3428.30585  | 1.14 |
|              | down | up   | -3428.305498 | 1.36 |

| TS          | Orientation I | Orientation II | G <sup>‡</sup> (a.u.) | ΔΔG <sup>‡</sup> (kcal/mmol) |
|-------------|---------------|----------------|-----------------------|------------------------------|
| <i>R-re</i> | up            | up             | -3428.307665          | 0.00                         |
|             | up            | down           | -3428.307105          | 0.35                         |
|             | down          | up             | -3428.306828          | 0.53                         |
|             | down          | down           | -3428.306622          | 0.65                         |

|             |      |      |              |      |
|-------------|------|------|--------------|------|
| <i>S-si</i> | up   | up   | -3428.303409 | 2.67 |
|             | up   | down |              |      |
|             | down | up   | -3428.303673 | 2.51 |
|             | down | down |              |      |

|             |      |      |             |       |
|-------------|------|------|-------------|-------|
| <i>S-re</i> | up   | up   | -3428.30801 | -0.22 |
|             | up   | down |             |       |
|             | down | up   |             |       |
|             | down | down |             |       |

\* Assignments of “up” and “down” are shown in ESI page S55.

#### DFT calculation of real system using SPHENOL-derived CPA (S)-1ca

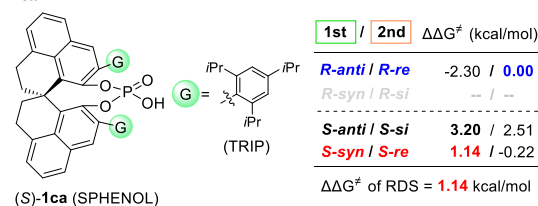

#### TS-1st-(R)-reaction pathway: *R-anti*/(*S*)-1ca (SPHENOL)

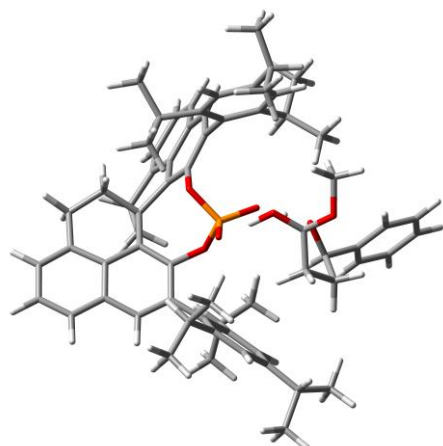

B3LYP/6-31G(d); E(RB3LYP) = -3429.49279510 Hartree  
 Zero-point correction = 1.289302 Hartree  
 Thermal correction to Energy = 1.360115 Hartree  
 Thermal correction to Enthalpy = 1.361060 Hartree  
 Thermal correction to Gibbs Free Energy = 1.181467 Hartree  
 Sum of electronic and zero-point Energies = -3428.203494 Hartree  
 Sum of electronic and thermal Energies = -3428.132680 Hartree  
 Sum of electronic and thermal Enthalpies = -3428.131736 Hartree  
 Sum of electronic and thermal Free Energies = -3428.311328 Hartree  
 The number of Imaginary frequencies = 1

| Center Number | Atomic Number | Atomic Type | Coordinates (Angstroms) |          |           |
|---------------|---------------|-------------|-------------------------|----------|-----------|
|               |               |             | X                       | Y        | Z         |
| 1             | 6             | 0           | 1.142601                | 4.520991 | -0.835144 |
| 2             | 6             | 0           | 0.608810                | 3.381129 | -0.111639 |
| 3             | 6             | 0           | 1.379861                | 2.228922 | -0.100389 |
| 4             | 6             | 0           | 2.688847                | 2.127905 | -0.670298 |
| 5             | 6             | 0           | 3.181138                | 3.231958 | -1.323817 |
| 6             | 6             | 0           | 2.427484                | 4.418521 | -1.465350 |
| 7             | 6             | 0           | 0.465551                | 5.777320 | -0.944016 |
| 8             | 6             | 0           | -0.840453               | 5.998794 | -0.230714 |
| 9             | 6             | 0           | -1.538040               | 4.687702 | 0.096731  |
| 10            | 6             | 0           | -0.621227               | 3.638531 | 0.807521  |
| 11            | 6             | 0           | 0.050024                | 4.200570 | 2.102347  |
| 12            | 6             | 0           | -0.934836               | 4.799929 | 3.095972  |
| 13            | 6             | 0           | -2.114206               | 3.897941 | 3.348733  |
| 14            | 6             | 0           | -2.445389               | 2.858562 | 2.422783  |
| 15            | 6             | 0           | -1.658704               | 2.559859 | 1.239897  |
| 16            | 6             | 0           | 2.964487                | 5.508611 | -2.197653 |

|    |   |   |           |           |           |     |    |   |           |           |           |
|----|---|---|-----------|-----------|-----------|-----|----|---|-----------|-----------|-----------|
| 17 | 6 | 0 | 2.268231  | 6.686969  | -2.315064 | 86  | 1  | 0 | 7.800562  | -1.371395 | -1.557863 |
| 18 | 6 | 0 | 1.018276  | 6.810933  | -1.678202 | 87  | 1  | 0 | 8.111146  | -1.117512 | 0.165937  |
| 19 | 6 | 0 | -3.632291 | 2.099048  | 2.690515  | 88  | 1  | 0 | 8.530643  | -2.668310 | -0.589771 |
| 20 | 6 | 0 | -4.045823 | 1.105019  | 1.774455  | 89  | 1  | 0 | 2.800464  | 1.366839  | -3.056261 |
| 21 | 6 | 0 | -3.288561 | 0.757684  | 0.681781  | 90  | 1  | 0 | 2.069197  | -0.938408 | -3.454676 |
| 22 | 6 | 0 | -2.072495 | 1.484215  | 0.469840  | 91  | 1  | 0 | 2.698495  | -0.209593 | -4.937701 |
| 23 | 6 | 0 | -2.892013 | 4.107156  | 4.473595  | 92  | 1  | 0 | 3.681255  | -1.388341 | -4.064510 |
| 24 | 6 | 0 | -4.044617 | 3.341613  | 4.734866  | 93  | 1  | 0 | 5.217184  | 2.053876  | -3.358720 |
| 25 | 6 | 0 | -4.411681 | 2.359452  | 3.846700  | 94  | 1  | 0 | 4.458015  | 1.554076  | -4.881213 |
| 26 | 6 | 0 | 3.552193  | 0.905798  | -0.542358 | 95  | 1  | 0 | 5.565969  | 0.460868  | -4.036005 |
| 27 | 6 | 0 | -3.779146 | -0.308374 | -0.256038 | 96  | 1  | 0 | -3.559275 | 2.082603  | -1.392768 |
| 28 | 6 | 0 | -4.004146 | -1.630281 | 0.210105  | 97  | 1  | 0 | -6.035601 | 2.018121  | -1.557818 |
| 29 | 6 | 0 | -4.534344 | -2.576764 | -0.676963 | 98  | 1  | 0 | -5.319205 | 3.062080  | -2.801816 |
| 30 | 6 | 0 | -4.855334 | -2.275669 | -1.999911 | 99  | 1  | 0 | -5.922126 | 1.453585  | -3.231831 |
| 31 | 6 | 0 | -4.638564 | -0.966159 | -2.432566 | 100 | 1  | 0 | -2.103401 | 1.118653  | -3.177693 |
| 32 | 6 | 0 | -4.116178 | 0.022931  | -1.594549 | 101 | 1  | 0 | -2.992566 | 2.551787  | -3.731067 |
| 33 | 6 | 0 | 4.032816  | 0.506785  | 0.728588  | 102 | 1  | 0 | -3.516868 | 0.941318  | -4.236382 |
| 34 | 6 | 0 | 4.915460  | -0.578060 | 0.820169  | 103 | 1  | 0 | -3.168068 | -1.289731 | 2.150989  |
| 35 | 6 | 0 | 5.354054  | -1.279521 | -0.303100 | 104 | 1  | 0 | -1.946211 | -3.255917 | 1.202081  |
| 36 | 6 | 0 | 4.866209  | -0.868738 | -1.547550 | 105 | 1  | 0 | -2.654654 | -3.580099 | 2.788322  |
| 37 | 6 | 0 | 3.983801  | 0.206438  | -1.701995 | 106 | 1  | 0 | -3.422027 | -4.231875 | 1.339553  |
| 38 | 6 | 0 | 3.699416  | 1.262850  | 2.015859  | 107 | 1  | 0 | -5.686286 | -1.386030 | 2.416458  |
| 39 | 6 | 0 | 4.954391  | 1.947605  | 2.594861  | 108 | 1  | 0 | -4.853351 | -2.545439 | 3.467967  |
| 40 | 6 | 0 | 3.022953  | 0.364241  | 3.067937  | 109 | 1  | 0 | -5.645807 | -3.096140 | 1.981974  |
| 41 | 6 | 0 | 6.387572  | -2.400481 | -0.232560 | 110 | 1  | 0 | -7.037817 | -2.084499 | -3.778014 |
| 42 | 6 | 0 | 6.423220  | -3.149957 | 1.108096  | 111 | 1  | 0 | -7.376143 | -3.822850 | -3.845107 |
| 43 | 6 | 0 | 7.791288  | -1.858129 | -0.576942 | 112 | 1  | 0 | -7.525340 | -2.943357 | -2.309307 |
| 44 | 6 | 0 | 3.576316  | 0.601462  | -3.125504 | 113 | 1  | 0 | -4.671843 | -2.607487 | -4.831094 |
| 45 | 6 | 0 | 2.973003  | -0.560706 | -3.935574 | 114 | 1  | 0 | -3.601146 | -3.743394 | -4.002717 |
| 46 | 6 | 0 | 4.773528  | 1.205197  | -3.890502 | 115 | 1  | 0 | -5.066519 | -4.331817 | -4.817126 |
| 47 | 6 | 0 | -4.007214 | 1.441793  | -2.155498 | 116 | 8  | 0 | 0.908734  | 1.087402  | 0.550717  |
| 48 | 6 | 0 | -5.403689 | 2.025397  | -2.453117 | 117 | 8  | 0 | -1.314179 | 1.081378  | -0.630981 |
| 49 | 6 | 0 | -3.099652 | 1.511977  | -3.397935 | 118 | 15 | 0 | -0.049082 | 0.098662  | -0.329296 |
| 50 | 6 | 0 | -3.736204 | -2.077262 | 1.650355  | 119 | 8  | 0 | -0.429791 | -1.025189 | 0.635100  |
| 51 | 6 | 0 | -2.889715 | -3.360159 | 1.740114  | 120 | 8  | 0 | 0.551229  | -0.289096 | -1.654757 |
| 52 | 6 | 0 | -5.057153 | -2.282267 | 2.422765  | 121 | 6  | 0 | 0.558759  | -3.600491 | -1.575980 |
| 53 | 6 | 0 | -5.458135 | -3.331807 | -2.917159 | 122 | 8  | 0 | 0.303521  | -3.272422 | 0.087852  |
| 54 | 6 | 0 | -6.936761 | -3.028466 | -3.229284 | 123 | 6  | 0 | 1.547976  | -3.487360 | 0.816677  |
| 55 | 6 | 0 | -4.651174 | -3.514253 | -4.215531 | 124 | 6  | 0 | 2.494203  | -4.139574 | -0.211181 |
| 56 | 1 | 0 | 4.181218  | 3.201412  | -1.745198 | 125 | 6  | 0 | 2.075957  | -3.536171 | -1.549967 |
| 57 | 1 | 0 | -0.656520 | 6.565384  | 0.693886  | 126 | 1  | 0 | 1.935004  | -2.498482 | 1.087092  |
| 58 | 1 | 0 | -1.500752 | 6.629958  | -0.838783 | 127 | 1  | 0 | 2.357884  | -5.225008 | -0.219023 |
| 59 | 1 | 0 | -2.419124 | 4.883929  | 0.713507  | 128 | 1  | 0 | 3.537216  | -3.927394 | 0.035850  |
| 60 | 1 | 0 | -1.901498 | 4.223435  | -0.828288 | 129 | 1  | 0 | 2.471390  | -4.080460 | -2.412267 |
| 61 | 1 | 0 | 0.590358  | 3.368791  | 2.570518  | 130 | 1  | 0 | 2.385112  | -2.490135 | -1.621602 |
| 62 | 1 | 0 | 0.801101  | 4.948853  | 1.832619  | 131 | 8  | 0 | -0.160458 | -2.715424 | -2.248176 |
| 63 | 1 | 0 | -0.421263 | 5.022112  | 4.040067  | 132 | 8  | 0 | 0.127892  | -4.868465 | -1.723994 |
| 64 | 1 | 0 | -1.297246 | 5.768387  | 2.721427  | 133 | 6  | 0 | -1.288833 | -5.057008 | -1.897167 |
| 65 | 1 | 0 | 3.937977  | 5.386768  | -2.666086 | 134 | 1  | 0 | -1.439557 | -6.136562 | -1.855884 |
| 66 | 1 | 0 | 2.674137  | 7.518036  | -2.885293 | 135 | 1  | 0 | -1.611086 | -4.665115 | -2.864152 |
| 67 | 1 | 0 | 0.469186  | 7.746965  | -1.756558 | 136 | 1  | 0 | -1.844908 | -4.563487 | -1.096328 |
| 68 | 1 | 0 | -4.991676 | 0.603120  | 1.950316  | 137 | 6  | 0 | 1.311384  | -4.301368 | 2.067373  |
| 69 | 1 | 0 | -2.602868 | 4.891964  | 5.169648  | 138 | 6  | 0 | 1.815796  | -3.861439 | 3.294810  |
| 70 | 1 | 0 | -4.634458 | 3.532334  | 5.627265  | 139 | 6  | 0 | 0.615383  | -5.516697 | 2.011623  |
| 71 | 1 | 0 | -5.301802 | 1.758692  | 4.016178  | 140 | 6  | 0 | 1.640579  | -4.627463 | 4.449628  |
| 72 | 1 | 0 | -4.714880 | -3.587603 | -0.317665 | 141 | 1  | 0 | 2.342427  | -2.911434 | 3.349450  |
| 73 | 1 | 0 | -4.899391 | -0.696495 | -3.452799 | 142 | 6  | 0 | 0.432411  | -6.277388 | 3.164503  |
| 74 | 1 | 0 | 5.286724  | -0.859058 | 1.801130  | 143 | 1  | 0 | 0.210460  | -5.855018 | 1.061874  |
| 75 | 1 | 0 | 5.204628  | -1.398733 | -2.435937 | 144 | 6  | 0 | 0.948081  | -5.836291 | 4.386777  |
| 76 | 1 | 0 | 2.992643  | 2.059616  | 1.774181  | 145 | 1  | 0 | 2.037162  | -4.273409 | 5.397418  |
| 77 | 1 | 0 | 5.411014  | 2.621413  | 1.861367  | 146 | 1  | 0 | -0.113648 | -7.215641 | 3.111379  |
| 78 | 1 | 0 | 4.693698  | 2.537164  | 3.482297  | 147 | 1  | 0 | 0.805114  | -6.430999 | 5.285054  |
| 79 | 1 | 0 | 5.713707  | 1.215011  | 2.893092  | 148 | 1  | 0 | -0.078326 | -2.215847 | 0.302389  |
| 80 | 1 | 0 | 2.104117  | -0.077925 | 2.671009  | 149 | 1  | 0 | 0.157455  | -1.761696 | -2.100454 |
| 81 | 1 | 0 | 2.759984  | 0.950622  | 3.956874  | 150 | 1  | 0 | -5.427847 | -4.286386 | -2.373066 |
| 82 | 1 | 0 | 3.687969  | -0.444522 | 3.396292  | 151 | 1  | 0 | 6.122875  | -3.129965 | -1.012203 |
| 83 | 1 | 0 | 6.792413  | -2.510641 | 1.918688  |     |    |   |           |           |           |
| 84 | 1 | 0 | 7.099074  | -4.009965 | 1.041660  |     |    |   |           |           |           |
| 85 | 1 | 0 | 5.433867  | -3.520018 | 1.400030  |     |    |   |           |           |           |

TS-2nd-(R)-reaction pathway: R-re(S)-1ca (SPHENOL)

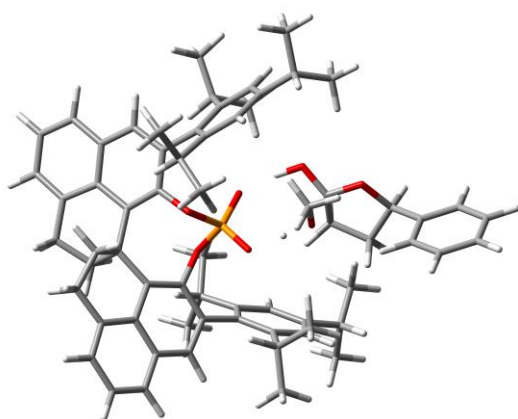

B3LYP/6-31G(d); E(RB3LYP) = -3429.48594863

Zero-point correction= 1.290558 (Hartree/Particle)  
 Thermal correction to Energy= 1.361343  
 Thermal correction to Enthalpy= 1.362287  
 Thermal correction to Gibbs Free Energy= 1.183242  
 Sum of electronic and zero-point Energies= -3428.200349  
 Sum of electronic and thermal Energies= -3428.129564  
 Sum of electronic and thermal Enthalpies= -3428.128620  
 Sum of electronic and thermal Free Energies= -3428.307665  
 The number of Imaginary frequencies = 1

| Center Number | Atomic Number | Atomic Type | Coordinates (Angstroms) |           |           |
|---------------|---------------|-------------|-------------------------|-----------|-----------|
|               |               |             | X                       | Y         | Z         |
| 1             | 6             | 0           | 3.446748                | -2.642314 | -1.998650 |
| 2             | 6             | 0           | 3.009279                | -1.710322 | -0.973710 |
| 3             | 6             | 0           | 1.842859                | -2.031837 | -0.297275 |
| 4             | 6             | 0           | 1.139450                | -3.271716 | -0.442875 |
| 5             | 6             | 0           | 1.625734                | -4.170490 | -1.360719 |
| 6             | 6             | 0           | 2.731866                | -3.871267 | -2.188793 |
| 7             | 6             | 0           | 4.582552                | -2.413414 | -2.838264 |
| 8             | 6             | 0           | 5.432705                | -1.182431 | -2.660599 |
| 9             | 6             | 0           | 4.723763                | -0.094401 | -1.866305 |
| 10            | 6             | 0           | 4.036062                | -0.611593 | -0.561900 |
| 11            | 6             | 0           | 5.009862                | -1.423964 | 0.354819  |
| 12            | 6             | 0           | 6.282041                | -0.676720 | 0.722782  |
| 13            | 6             | 0           | 5.989284                | 0.699860  | 1.253700  |
| 14            | 6             | 0           | 4.746165                | 1.340034  | 0.948385  |
| 15            | 6             | 0           | 3.686445                | 0.714124  | 0.177432  |
| 16            | 6             | 0           | 3.136584                | -4.797476 | -3.183773 |
| 17            | 6             | 0           | 4.215910                | -4.533132 | -3.992187 |
| 18            | 6             | 0           | 4.931601                | -3.334488 | -3.810117 |
| 19            | 6             | 0           | 4.576515                | 2.684710  | 1.419607  |
| 20            | 6             | 0           | 3.398282                | 3.394141  | 1.097638  |
| 21            | 6             | 0           | 2.364657                | 2.816512  | 0.400505  |
| 22            | 6             | 0           | 2.540360                | 1.464207  | -0.037989 |
| 23            | 6             | 0           | 6.946342                | 1.348313  | 2.012944  |
| 24            | 6             | 0           | 6.756512                | 2.660184  | 2.488409  |
| 25            | 6             | 0           | 5.589623                | 3.318272  | 2.184746  |
| 26            | 6             | 0           | -0.066089               | -3.623447 | 0.381393  |
| 27            | 6             | 0           | 1.124219                | 3.614028  | 0.121817  |
| 28            | 6             | 0           | 0.330742                | 4.097840  | 1.197916  |
| 29            | 6             | 0           | -0.797623               | 4.871999  | 0.908804  |
| 30            | 6             | 0           | -1.184799               | 5.182059  | -0.396094 |
| 31            | 6             | 0           | -0.376518               | 4.717680  | -1.434670 |
| 32            | 6             | 0           | 0.774403                | 3.952291  | -1.207871 |
| 33            | 6             | 0           | 0.046309                | -3.764228 | 1.789274  |
| 34            | 6             | 0           | -1.075713               | -4.147465 | 2.529936  |
| 35            | 6             | 0           | -2.311455               | -4.411072 | 1.935291  |
| 36            | 6             | 0           | -2.397635               | -4.283757 | 0.549046  |
| 37            | 6             | 0           | -1.309064               | -3.901124 | -0.247051 |

|     |   |   |           |           |           |
|-----|---|---|-----------|-----------|-----------|
| 38  | 6 | 0 | 1.366945  | -3.588352 | 2.540210  |
| 39  | 6 | 0 | 1.858714  | -4.934802 | 3.109928  |
| 40  | 6 | 0 | 1.275197  | -2.518061 | 3.643969  |
| 41  | 6 | 0 | -3.513472 | -4.863884 | 2.754418  |
| 42  | 6 | 0 | -3.881527 | -3.861587 | 3.863739  |
| 43  | 6 | 0 | -3.297587 | -6.273033 | 3.340287  |
| 44  | 6 | 0 | -1.519917 | -3.852234 | -1.763598 |
| 45  | 6 | 0 | -2.736108 | -3.006710 | -2.183689 |
| 46  | 6 | 0 | -1.657211 | -5.274548 | -2.347862 |
| 47  | 6 | 0 | 1.647379  | 3.589654  | -2.410194 |
| 48  | 6 | 0 | 2.287928  | 4.853707  | -3.019657 |
| 49  | 6 | 0 | 0.885190  | 2.786398  | -3.480035 |
| 50  | 6 | 0 | 0.661625  | 3.849368  | 2.673919  |
| 51  | 6 | 0 | -0.504788 | 3.232868  | 3.469664  |
| 52  | 6 | 0 | 1.131351  | 5.153080  | 3.353901  |
| 53  | 6 | 0 | -2.416098 | 6.030040  | -0.688425 |
| 54  | 6 | 0 | -3.675521 | 5.526501  | 0.040350  |
| 55  | 6 | 0 | -2.156370 | 7.516271  | -0.370981 |
| 56  | 1 | 0 | 1.144488  | -5.137025 | -1.471266 |
| 57  | 1 | 0 | 6.367395  | -1.463123 | -2.153860 |
| 58  | 1 | 0 | 5.734950  | -0.790262 | -3.640094 |
| 59  | 1 | 0 | 5.433821  | 0.699887  | -1.617910 |
| 60  | 1 | 0 | 3.940584  | 0.366404  | -2.480286 |
| 61  | 1 | 0 | 4.456215  | -1.678671 | 1.267044  |
| 62  | 1 | 0 | 5.266946  | -2.370556 | -0.127588 |
| 63  | 1 | 0 | 6.851415  | -1.253762 | 1.462448  |
| 64  | 1 | 0 | 6.936082  | -0.595300 | -0.157676 |
| 65  | 1 | 0 | 2.566932  | -5.716576 | -3.296949 |
| 66  | 1 | 0 | 4.518219  | -5.236554 | -4.763214 |
| 67  | 1 | 0 | 5.788677  | -3.122345 | -4.446081 |
| 68  | 1 | 0 | 3.312073  | 4.427297  | 1.420308  |
| 69  | 1 | 0 | 7.873164  | 0.825918  | 2.241003  |
| 70  | 1 | 0 | 7.527905  | 3.141574  | 3.083275  |
| 71  | 1 | 0 | 5.417079  | 4.335311  | 2.528003  |
| 72  | 1 | 0 | -1.401600 | 5.234507  | 1.735780  |
| 73  | 1 | 0 | -0.641156 | 4.979877  | -2.457380 |
| 74  | 1 | 0 | -0.972049 | -4.262006 | 3.606147  |
| 75  | 1 | 0 | -3.347364 | -4.505338 | 0.066994  |
| 76  | 1 | 0 | 2.126508  | -3.254614 | 1.829879  |
| 77  | 1 | 0 | 1.969505  | -5.684286 | 2.318128  |
| 78  | 1 | 0 | 2.832499  | -4.810231 | 3.599243  |
| 79  | 1 | 0 | 1.161111  | -5.336583 | 3.854405  |
| 80  | 1 | 0 | 0.944332  | -1.559978 | 3.233792  |
| 81  | 1 | 0 | 2.256847  | -2.371122 | 4.110939  |
| 82  | 1 | 0 | 0.577437  | -2.813427 | 4.437079  |
| 83  | 1 | 0 | -3.078237 | -3.769540 | 4.603870  |
| 84  | 1 | 0 | -4.784966 | -4.185871 | 4.394149  |
| 85  | 1 | 0 | -4.067179 | -2.862788 | 3.452424  |
| 86  | 1 | 0 | -3.077948 | -6.999432 | 2.550393  |
| 87  | 1 | 0 | -2.457794 | -6.283104 | 4.045185  |
| 88  | 1 | 0 | -4.191077 | -6.611958 | 3.878763  |
| 89  | 1 | 0 | -0.642627 | -3.383177 | -2.214340 |
| 90  | 1 | 0 | -2.656180 | -1.985428 | -1.806984 |
| 91  | 1 | 0 | -2.794893 | -2.959926 | -3.278137 |
| 92  | 1 | 0 | -3.680670 | -3.436455 | -1.828125 |
| 93  | 1 | 0 | -0.799575 | -5.908199 | -2.099028 |
| 94  | 1 | 0 | -1.742802 | -5.234586 | -3.440714 |
| 95  | 1 | 0 | -2.553910 | -5.773286 | -1.960237 |
| 96  | 1 | 0 | 2.468590  | 2.959257  | -2.060831 |
| 97  | 1 | 0 | 2.871083  | 5.401675  | -2.271133 |
| 98  | 1 | 0 | 2.959494  | 4.584732  | -3.844361 |
| 99  | 1 | 0 | 1.528451  | 5.537720  | -3.416688 |
| 100 | 1 | 0 | 0.471542  | 1.866981  | -3.055693 |
| 101 | 1 | 0 | 1.560403  | 2.509112  | -4.298959 |
| 102 | 1 | 0 | 0.065158  | 3.369321  | -3.917312 |
| 103 | 1 | 0 | 1.483841  | 3.132423  | 2.724516  |
| 104 | 1 | 0 | -0.785323 | 2.262434  | 3.056753  |
| 105 | 1 | 0 | -0.199648 | 3.082758  | 4.512789  |
| 106 | 1 | 0 | -1.389977 | 3.879377  | 3.477104  |

|     |    |   |            |           |           |
|-----|----|---|------------|-----------|-----------|
| 107 | 1  | 0 | 1.981986   | 5.605548  | 2.832066  |
| 108 | 1  | 0 | 1.433813   | 4.958370  | 4.390126  |
| 109 | 1  | 0 | 0.327895   | 5.899361  | 3.375504  |
| 110 | 1  | 0 | -3.589590  | 5.660968  | 1.125055  |
| 111 | 1  | 0 | -4.557334  | 6.088912  | -0.289955 |
| 112 | 1  | 0 | -3.852178  | 4.462079  | -0.143409 |
| 113 | 1  | 0 | -1.952443  | 7.657991  | 0.697258  |
| 114 | 1  | 0 | -1.292914  | 7.896316  | -0.928162 |
| 115 | 1  | 0 | -3.028509  | 8.128952  | -0.630807 |
| 116 | 8  | 0 | 1.302142   | -1.146903 | 0.634980  |
| 117 | 8  | 0 | 1.492751   | 0.919469  | -0.780583 |
| 118 | 15 | 0 | 0.372869   | 0.055789  | 0.041487  |
| 119 | 8  | 0 | -0.208402  | 0.781295  | 1.225599  |
| 120 | 8  | 0 | -0.586829  | -0.449069 | -1.032175 |
| 121 | 1  | 0 | -1.839695  | 0.060718  | -1.063656 |
| 122 | 6  | 0 | -3.336435  | 0.975744  | 0.438631  |
| 123 | 8  | 0 | -4.593046  | 1.437983  | 0.246832  |
| 124 | 8  | 0 | -2.856354  | 0.476866  | -1.128052 |
| 125 | 6  | 0 | -5.589724  | 0.413689  | 0.586100  |
| 126 | 6  | 0 | -4.773337  | -0.879613 | 0.782147  |
| 127 | 6  | 0 | -3.388478  | -0.356862 | 1.174680  |
| 128 | 1  | 0 | -6.020629  | 0.737213  | 1.540597  |
| 129 | 1  | 0 | -4.718803  | -1.445075 | -0.151154 |
| 130 | 1  | 0 | -5.224982  | -1.523173 | 1.541640  |
| 131 | 1  | 0 | -2.565042  | -1.024106 | 0.919821  |
| 132 | 1  | 0 | -3.323741  | -0.128590 | 2.244631  |
| 133 | 8  | 0 | -2.504546  | 1.939183  | 0.785322  |
| 134 | 6  | 0 | -2.836378  | 1.558614  | -2.086296 |
| 135 | 1  | 0 | -3.860443  | 1.909366  | -2.216770 |
| 136 | 1  | 0 | -2.451478  | 1.149201  | -3.022588 |
| 137 | 1  | 0 | -2.196590  | 2.372085  | -1.735219 |
| 138 | 1  | 0 | -1.586047  | 1.554158  | 0.990858  |
| 139 | 6  | 0 | -6.678394  | 0.369728  | -0.458060 |
| 140 | 6  | 0 | -7.999991  | 0.651793  | -0.098889 |
| 141 | 6  | 0 | -6.393081  | 0.034668  | -1.789697 |
| 142 | 6  | 0 | -9.024382  | 0.593181  | -1.046224 |
| 143 | 1  | 0 | -8.230235  | 0.920992  | 0.929529  |
| 144 | 6  | 0 | -7.412331  | -0.015579 | -2.738404 |
| 145 | 1  | 0 | -5.369892  | -0.185253 | -2.080961 |
| 146 | 6  | 0 | -8.731676  | 0.261044  | -2.368523 |
| 147 | 1  | 0 | -10.046750 | 0.812713  | -0.750899 |
| 148 | 1  | 0 | -7.178658  | -0.273828 | -3.767803 |
| 149 | 1  | 0 | -9.525584  | 0.218404  | -3.109236 |
| 150 | 1  | 0 | -2.606960  | 5.955231  | -1.768462 |
| 151 | 1  | 0 | -4.368731  | -4.922911 | 2.066672  |

B3LYP/6-31G(d); E(RB3LYP) = -3429.48406763 Hartree  
 Zero-point correction= 1.289509 Hartree  
 Thermal correction to Energy= 1.360308 Hartree  
 Thermal correction to Enthalpy= 1.361252 Hartree  
 Thermal correction to Gibbs Free Energy= 1.181496 Hartree  
 Sum of electronic and zero-point Energies= -3428.194558 Hartree  
 Sum of electronic and thermal Energies= -3428.123759 Hartree  
 Sum of electronic and thermal Enthalpies= -3428.122815 Hartree  
 Sum of electronic and thermal Free Energies= -3428.302572 Hartree  
 The number of Imaginary frequencies = 1

| Center Number | Atomic Number | Atomic Type | Coordinates (Angstroms) |           |           |
|---------------|---------------|-------------|-------------------------|-----------|-----------|
|               |               |             | X                       | Y         | Z         |
| 1             | 6             | 0           | -0.697916               | -4.193685 | 1.808519  |
| 2             | 6             | 0           | -0.967401               | -3.168487 | 0.812383  |
| 3             | 6             | 0           | 0.132142                | -2.569005 | 0.212241  |
| 4             | 6             | 0           | 1.487343                | -2.970924 | 0.443647  |
| 5             | 6             | 0           | 1.703961                | -3.992062 | 1.337807  |
| 6             | 6             | 0           | 0.655534                | -4.588842 | 2.068533  |
| 7             | 6             | 0           | -1.718754               | -4.879300 | 2.541779  |
| 8             | 6             | 0           | -3.171512               | -4.600561 | 2.270674  |
| 9             | 6             | 0           | -3.374133               | -3.274459 | 1.556685  |
| 10            | 6             | 0           | -2.440912               | -3.065550 | 0.317490  |
| 11            | 6             | 0           | -2.512803               | -4.242285 | -0.710648 |
| 12            | 6             | 0           | -3.923966               | -4.583944 | -1.163461 |
| 13            | 6             | 0           | -4.710072               | -3.361563 | -1.554182 |
| 14            | 6             | 0           | -4.296341               | -2.061759 | -1.121787 |
| 15            | 6             | 0           | -3.092201               | -1.816262 | -0.345578 |
| 16            | 6             | 0           | 0.953542                | -5.583991 | 3.034997  |
| 17            | 6             | 0           | -0.050482               | -6.193517 | 3.746577  |
| 18            | 6             | 0           | -1.386402               | -5.832481 | 3.487681  |
| 19            | 6             | 0           | -5.150309               | -0.962809 | -1.464568 |
| 20            | 6             | 0           | -4.822860               | 0.335967  | -1.018643 |
| 21            | 6             | 0           | -3.652012               | 0.611109  | -0.353558 |
| 22            | 6             | 0           | -2.792222               | -0.494770 | -0.050502 |
| 23            | 6             | 0           | -5.857731               | -3.517231 | -2.311104 |
| 24            | 6             | 0           | -6.677431               | -2.425634 | -2.655510 |
| 25            | 6             | 0           | -6.329673               | -1.168018 | -2.225748 |
| 26            | 6             | 0           | 2.681422                | -2.360044 | -0.229505 |
| 27            | 6             | 0           | -3.361600               | 2.032856  | 0.031128  |
| 28            | 6             | 0           | -3.293444               | 3.040120  | -0.970586 |
| 29            | 6             | 0           | -3.117678               | 4.371109  | -0.573448 |
| 30            | 6             | 0           | -3.023915               | 4.756685  | 0.763935  |
| 31            | 6             | 0           | -3.105642               | 3.752659  | 1.729757  |
| 32            | 6             | 0           | -3.274567               | 2.404785  | 1.397137  |
| 33            | 6             | 0           | 2.871912                | -2.484046 | -1.627786 |
| 34            | 6             | 0           | 4.056795                | -2.006905 | -2.202355 |
| 35            | 6             | 0           | 5.071849                | -1.420322 | -1.445021 |
| 36            | 6             | 0           | 4.861846                | -1.304166 | -0.067881 |
| 37            | 6             | 0           | 3.700167                | -1.764838 | 0.564325  |
| 38            | 6             | 0           | 1.876330                | -3.201162 | -2.540675 |
| 39            | 6             | 0           | 2.487210                | -4.495226 | -3.116529 |
| 40            | 6             | 0           | 1.350148                | -2.287839 | -3.663683 |
| 41            | 6             | 0           | 6.410461                | -1.002739 | -2.045580 |
| 42            | 6             | 0           | 6.312420                | -0.415308 | -3.462508 |
| 43            | 6             | 0           | 7.400207                | -2.186915 | -2.023087 |
| 44            | 6             | 0           | 3.622244                | -1.636283 | 2.090766  |
| 45            | 6             | 0           | 3.711464                | -0.180829 | 2.581485  |
| 46            | 6             | 0           | 4.704271                | -2.497100 | 2.775650  |
| 47            | 6             | 0           | -3.443052               | 1.407785  | 2.544889  |
| 48            | 6             | 0           | -4.739581               | 1.685634  | 3.332978  |
| 49            | 6             | 0           | -2.219484               | 1.382497  | 3.479968  |
| 50            | 6             | 0           | -3.464230               | 2.767005  | -2.470996 |
| 51            | 6             | 0           | -2.295072               | 3.275340  | -3.335556 |
| 52            | 6             | 0           | -4.789853               | 3.369716  | -2.984926 |
| 53            | 6             | 0           | -2.920180               | 6.232154  | 1.132792  |
| 54            | 6             | 0           | -4.311273               | 6.808990  | 1.467809  |
| 55            | 6             | 0           | -1.929953               | 6.515178  | 2.275064  |

TS-1st-(S)-reaction pathway: *S-anti*/(*S*)-1ca (SPHENOL)

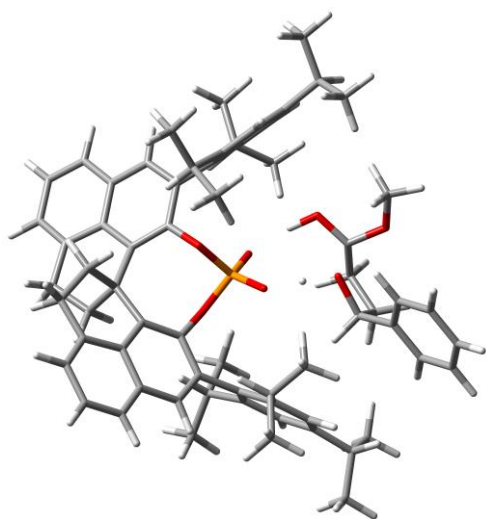



|    |   |   |           |           |           |     |    |   |           |           |           |
|----|---|---|-----------|-----------|-----------|-----|----|---|-----------|-----------|-----------|
| 5  | 6 | 0 | -1.975072 | -4.023257 | 1.464772  | 74  | 1  | 0 | 0.738671  | -5.015002 | -3.277312 |
| 6  | 6 | 0 | -3.099998 | -3.595741 | 2.200821  | 75  | 1  | 0 | 2.847856  | -5.198454 | 0.430969  |
| 7  | 6 | 0 | -4.915011 | -2.013314 | 2.593515  | 76  | 1  | 0 | -2.240188 | -3.309153 | -1.850926 |
| 8  | 6 | 0 | -5.694020 | -0.777860 | 2.236923  | 77  | 1  | 0 | -2.421730 | -5.774863 | -2.113392 |
| 9  | 6 | 0 | -4.834901 | 0.237784  | 1.502134  | 78  | 1  | 0 | -3.073682 | -4.905668 | -3.516523 |
| 10 | 6 | 0 | -4.037424 | -0.353953 | 0.292315  | 79  | 1  | 0 | -1.492130 | -5.693735 | -3.618141 |
| 11 | 6 | 0 | -4.953002 | -1.089701 | -0.739356 | 80  | 1  | 0 | -0.760156 | -1.936473 | -3.301605 |
| 12 | 6 | 0 | -6.126650 | -0.253958 | -1.228588 | 81  | 1  | 0 | -2.086994 | -2.667201 | -4.221841 |
| 13 | 6 | 0 | -5.713319 | 1.138084  | -1.627452 | 82  | 1  | 0 | -0.458202 | -3.343759 | -4.343550 |
| 14 | 6 | 0 | -4.469103 | 1.685274  | -1.179677 | 83  | 1  | 0 | 3.431810  | -7.402957 | -0.578343 |
| 15 | 6 | 0 | -3.506602 | 0.945013  | -0.383479 | 84  | 1  | 0 | 3.896703  | -7.989948 | -2.183545 |
| 16 | 6 | 0 | -3.620752 | -4.421931 | 3.230449  | 85  | 1  | 0 | 2.184939  | -7.938854 | -1.714394 |
| 17 | 6 | 0 | -4.739812 | -4.046796 | 3.932562  | 86  | 1  | 0 | 4.346959  | -4.270268 | -2.589532 |
| 18 | 6 | 0 | -5.383040 | -2.838916 | 3.599433  | 87  | 1  | 0 | 4.746465  | -5.152128 | -1.104322 |
| 19 | 6 | 0 | -4.193367 | 3.047075  | -1.530662 | 88  | 1  | 0 | 5.161367  | -5.841899 | -2.679575 |
| 20 | 6 | 0 | -3.010017 | 3.658147  | -1.061259 | 89  | 1  | 0 | 0.291876  | -3.318594 | 2.349732  |
| 21 | 6 | 0 | -2.043361 | 2.960535  | -0.376706 | 90  | 1  | 0 | 2.391533  | -2.145328 | 1.827511  |
| 22 | 6 | 0 | -2.310709 | 1.582638  | -0.085852 | 91  | 1  | 0 | 2.477457  | -2.938627 | 3.405060  |
| 23 | 6 | 0 | -6.569724 | 1.893939  | -2.408118 | 92  | 1  | 0 | 3.318728  | -3.650327 | 2.024083  |
| 24 | 6 | 0 | -6.277592 | 3.225463  | -2.760887 | 93  | 1  | 0 | 0.232394  | -5.830484 | 2.649024  |
| 25 | 6 | 0 | -5.108848 | 3.794102  | -2.315532 | 94  | 1  | 0 | 1.193716  | -5.017760 | 3.897572  |
| 26 | 6 | 0 | -0.197866 | -3.807496 | -0.228181 | 95  | 1  | 0 | 1.996294  | -5.863468 | 2.565489  |
| 27 | 6 | 0 | -0.811151 | 3.697332  | 0.068901  | 96  | 1  | 0 | -2.207042 | 2.687307  | 2.092804  |
| 28 | 6 | 0 | 0.008810  | 4.362026  | -0.886786 | 97  | 1  | 0 | -2.702207 | 5.046247  | 2.699042  |
| 29 | 6 | 0 | 1.059305  | 5.170070  | -0.433912 | 98  | 1  | 0 | -2.790742 | 3.965202  | 4.103678  |
| 30 | 6 | 0 | 1.346113  | 5.345265  | 0.922088  | 99  | 1  | 0 | -1.390910 | 5.027194  | 3.888438  |
| 31 | 6 | 0 | 0.542912  | 4.668022  | 1.839313  | 100 | 1  | 0 | -0.185326 | 1.510496  | 2.925473  |
| 32 | 6 | 0 | -0.535312 | 3.863268  | 1.450071  | 101 | 1  | 0 | -1.302245 | 1.906113  | 4.243674  |
| 33 | 6 | 0 | -0.268044 | -4.109200 | -1.610675 | 102 | 1  | 0 | 0.166630  | 2.864562  | 4.022278  |
| 34 | 6 | 0 | 0.803447  | -4.777156 | -2.217847 | 103 | 1  | 0 | -0.957105 | 3.505547  | -2.596379 |
| 35 | 6 | 0 | 1.930826  | -5.191216 | -1.510249 | 104 | 1  | 0 | 1.483298  | 2.948081  | -2.806839 |
| 36 | 6 | 0 | 1.982289  | -4.883466 | -0.147496 | 105 | 1  | 0 | 0.818885  | 3.748385  | -4.236851 |
| 37 | 6 | 0 | 0.956063  | -4.194765 | 0.510360  | 106 | 1  | 0 | 1.834836  | 4.655563  | -3.114671 |
| 38 | 6 | 0 | -1.499322 | -3.818664 | -2.469758 | 107 | 1  | 0 | -1.665551 | 5.943984  | -2.470710 |
| 39 | 6 | 0 | -2.156967 | -5.126436 | -2.956249 | 108 | 1  | 0 | -0.954765 | 5.520567  | -4.037695 |
| 40 | 6 | 0 | -1.175678 | -2.885617 | -3.651809 | 109 | 1  | 0 | -0.006176 | 6.416566  | -2.840842 |
| 41 | 6 | 0 | 3.037040  | -5.981488 | -2.198626 | 110 | 1  | 0 | 3.783637  | 6.166689  | -0.331806 |
| 42 | 6 | 0 | 3.142202  | -7.412288 | -1.635952 | 111 | 1  | 0 | 4.572159  | 6.686552  | 1.162645  |
| 43 | 6 | 0 | 4.400009  | -5.267496 | -2.138435 | 112 | 1  | 0 | 4.133976  | 4.983350  | 0.938577  |
| 44 | 6 | 0 | 1.134217  | -3.924344 | 2.009664  | 113 | 1  | 0 | 1.906408  | 7.983597  | 0.114248  |
| 45 | 6 | 0 | 2.408398  | -3.117109 | 2.325040  | 114 | 1  | 0 | 1.076196  | 7.982645  | 1.677261  |
| 46 | 6 | 0 | 1.135548  | -5.234990 | 2.824180  | 115 | 1  | 0 | 2.788306  | 8.444813  | 1.581769  |
| 47 | 6 | 0 | -1.414881 | 3.278267  | 2.556479  | 116 | 8  | 0 | -1.402601 | -1.217886 | -0.795419 |
| 48 | 6 | 0 | -2.113418 | 4.396935  | 3.356699  | 117 | 8  | 0 | -1.299030 | 0.891499  | 0.584743  |
| 49 | 6 | 0 | -0.631976 | 2.334847  | 3.488582  | 118 | 15 | 0 | -0.345612 | -0.051232 | -0.354839 |
| 50 | 6 | 0 | -0.212579 | 4.280879  | -2.401870 | 119 | 8  | 0 | 0.108734  | 0.635405  | -1.613948 |
| 51 | 6 | 0 | 1.058699  | 3.882769  | -3.175335 | 120 | 8  | 0 | 0.720587  | -0.596550 | 0.592536  |
| 52 | 6 | 0 | -0.745685 | 5.616085  | -2.965350 | 121 | 1  | 0 | 2.004115  | -0.620470 | 0.115818  |
| 53 | 6 | 0 | 2.440432  | 6.293159  | 1.398367  | 122 | 6  | 0 | 3.315826  | 0.946575  | -0.898713 |
| 54 | 6 | 0 | 3.809323  | 6.013625  | 0.753365  | 123 | 8  | 0 | 4.654842  | 0.978088  | -1.100598 |
| 55 | 6 | 0 | 2.027865  | 7.763116  | 1.181539  | 124 | 8  | 0 | 3.041733  | -0.581875 | -0.235568 |
| 56 | 1 | 0 | -1.564213 | -5.005109 | 1.676972  | 125 | 1  | 0 | 1.653005  | 0.886921  | -1.891701 |
| 57 | 1 | 0 | -6.555103 | -1.060131 | 1.613619  | 126 | 6  | 0 | 5.339304  | 1.639922  | 0.015218  |
| 58 | 1 | 0 | -6.118439 | -0.322969 | 3.140909  | 127 | 6  | 0 | 4.252799  | 1.808990  | 1.096014  |
| 59 | 1 | 0 | -5.458869 | 1.067832  | 1.161181  | 128 | 6  | 0 | 2.963725  | 1.856448  | 0.270834  |
| 60 | 1 | 0 | -4.098347 | 0.664789  | 2.194037  | 129 | 1  | 0 | 5.641996  | 2.620648  | -0.370061 |
| 61 | 1 | 0 | -4.316769 | -1.370701 | -1.587254 | 130 | 1  | 0 | 4.249337  | 0.949223  | 1.771449  |
| 62 | 1 | 0 | -5.323341 | -2.022464 | -0.303971 | 131 | 1  | 0 | 4.419427  | 2.708984  | 1.693690  |
| 63 | 1 | 0 | -6.616146 | -0.758055 | -2.071658 | 132 | 1  | 0 | 2.071418  | 1.538186  | 0.809731  |
| 64 | 1 | 0 | -6.890326 | -0.187924 | -0.439955 | 133 | 1  | 0 | 2.776043  | 2.854102  | -0.139546 |
| 65 | 1 | 0 | -3.110076 | -5.356006 | 3.451079  | 134 | 8  | 0 | 2.655009  | 0.965021  | -2.047332 |
| 66 | 1 | 0 | -5.133053 | -4.672613 | 4.729002  | 135 | 6  | 0 | 3.289022  | -1.644814 | -1.186182 |
| 67 | 1 | 0 | -6.280576 | -2.544875 | 4.139620  | 136 | 1  | 0 | 3.155759  | -2.587170 | -0.657745 |
| 68 | 1 | 0 | -2.864087 | 4.714368  | -1.259499 | 137 | 1  | 0 | 2.594261  | -1.579116 | -2.025845 |
| 69 | 1 | 0 | -7.498427 | 1.442220  | -2.750852 | 138 | 1  | 0 | 4.316181  | -1.535477 | -1.535400 |
| 70 | 1 | 0 | -6.972959 | 3.791749  | -3.374400 | 139 | 6  | 0 | 6.569454  | 0.863977  | 0.417441  |
| 71 | 1 | 0 | -4.858907 | 4.822774  | -2.563066 | 140 | 6  | 0 | 6.477657  | -0.468628 | 0.844149  |
| 72 | 1 | 0 | 1.661990  | 5.693056  | -1.171880 | 141 | 6  | 0 | 7.823602  | 1.481480  | 0.387718  |
| 73 | 1 | 0 | 0.740297  | 4.801270  | 2.900919  | 142 | 6  | 0 | 7.620448  | -1.164297 | 1.233273  |



|     |   |   |          |           |           |
|-----|---|---|----------|-----------|-----------|
| 143 | 1 | 0 | 5.508482 | -0.958721 | 0.867137  |
| 144 | 6 | 0 | 8.968874 | 0.788656  | 0.785957  |
| 145 | 1 | 0 | 7.906083 | 2.511872  | 0.049020  |
| 146 | 6 | 0 | 8.869234 | -0.536653 | 1.207961  |
| 147 | 1 | 0 | 7.537805 | -2.197769 | 1.559083  |
| 148 | 1 | 0 | 9.936181 | 1.282970  | 0.759269  |
| 149 | 1 | 0 | 9.758832 | -1.080444 | 1.514144  |
| 150 | 1 | 0 | 2.759144 | -6.065689 | -3.258157 |
| 151 | 1 | 0 | 2.550192 | 6.140060  | 2.480961  |

TS-1st-(S)-reaction pathway: S-syn/(S)-1ca (SPHENOL)

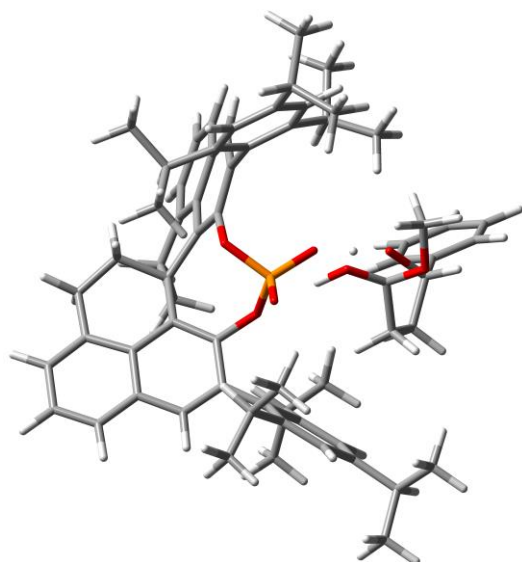

B3LYP/6-31G(d); E(RB3LYP) = -3429.48612444 Hartree

Zero-point correction= 1.289224 Hartree  
 Thermal correction to Energy= 1.360292 Hartree  
 Thermal correction to Enthalpy= 1.361236 Hartree  
 Thermal correction to Gibbs Free Energy= 1.180275 Hartree  
 Sum of electronic and zero-point Energies= -3428.196900 Hartree  
 Sum of electronic and thermal Energies= -3428.125833 Hartree  
 Sum of electronic and thermal Enthalpies= -3428.124888 Hartree  
 Sum of electronic and thermal Free Energies= -3428.305850 Hartree

The number of Imaginary frequencies = 1

| Center Number | Atomic Number | Atomic Type | Coordinates (Angstroms) |          |           |
|---------------|---------------|-------------|-------------------------|----------|-----------|
|               |               |             | X                       | Y        | Z         |
| 1             | 6             | 0           | 2.056970                | 4.038254 | -0.939631 |
| 2             | 6             | 0           | 1.283626                | 3.048072 | -0.212586 |
| 3             | 6             | 0           | 1.815811                | 1.768824 | -0.130443 |
| 4             | 6             | 0           | 3.095434                | 1.394589 | -0.651432 |
| 5             | 6             | 0           | 3.801945                | 2.352540 | -1.338900 |
| 6             | 6             | 0           | 3.303445                | 3.658183 | -1.538999 |
| 7             | 6             | 0           | 1.663718                | 5.407625 | -1.080895 |
| 8             | 6             | 0           | 0.429328                | 5.910280 | -0.386073 |
| 9             | 6             | 0           | -0.549375               | 4.782014 | -0.105675 |
| 10            | 6             | 0           | 0.082057                | 3.557331 | 0.636513  |
| 11            | 6             | 0           | 0.761222                | 3.955235 | 1.985658  |
| 12            | 6             | 0           | -0.145671               | 4.748010 | 2.918220  |
| 13            | 6             | 0           | -1.520200               | 4.142032 | 3.046117  |
| 14            | 6             | 0           | -1.994929               | 3.201851 | 2.078007  |
| 15            | 6             | 0           | -1.188569               | 2.722391 | 0.972019  |
| 16            | 6             | 0           | 4.064868                | 4.593496 | -2.286777 |
| 17            | 6             | 0           | 3.631568                | 5.887447 | -2.442086 |
| 18            | 6             | 0           | 2.429405                | 6.285793 | -1.825357 |
| 19            | 6             | 0           | -3.343695               | 2.736126 | 2.219133  |
| 20            | 6             | 0           | -3.881968               | 1.855690 | 1.251878  |
| 21            | 6             | 0           | -3.117048               | 1.321275 | 0.242565  |

|    |   |   |           |           |           |
|----|---|---|-----------|-----------|-----------|
| 22 | 6 | 0 | -1.749746 | 1.743905  | 0.167765  |
| 23 | 6 | 0 | -2.332384 | 4.530999  | 4.096670  |
| 24 | 6 | 0 | -3.650471 | 4.054415  | 4.234315  |
| 25 | 6 | 0 | -4.148876 | 3.178309  | 3.299804  |
| 26 | 6 | 0 | 3.745575  | 0.059138  | -0.419610 |
| 27 | 6 | 0 | -3.730779 | 0.379650  | -0.754168 |
| 28 | 6 | 0 | -4.330578 | -0.837745 | -0.327686 |
| 29 | 6 | 0 | -4.931516 | -1.666543 | -1.281509 |
| 30 | 6 | 0 | -4.968468 | -1.348581 | -2.640190 |
| 31 | 6 | 0 | -4.396982 | -0.139650 | -3.032231 |
| 32 | 6 | 0 | -3.789003 | 0.735667  | -2.125637 |
| 33 | 6 | 0 | 4.180625  | -0.288295 | 0.882830  |
| 34 | 6 | 0 | 4.911309  | -1.469370 | 1.065088  |
| 35 | 6 | 0 | 5.252671  | -2.310309 | 0.005770  |
| 36 | 6 | 0 | 4.818171  | -1.946233 | -1.271648 |
| 37 | 6 | 0 | 4.072294  | -0.786231 | -1.514353 |
| 38 | 6 | 0 | 3.983749  | 0.628032  | 2.091742  |
| 39 | 6 | 0 | 5.328781  | 1.241213  | 2.532936  |
| 40 | 6 | 0 | 3.286355  | -0.076167 | 3.268710  |
| 41 | 6 | 0 | 6.120904  | -3.541189 | 0.238204  |
| 42 | 6 | 0 | 7.515941  | -3.366920 | -0.394187 |
| 43 | 6 | 0 | 5.459237  | -4.842124 | -0.250853 |
| 44 | 6 | 0 | 3.695320  | -0.466407 | -2.964728 |
| 45 | 6 | 0 | 2.982302  | -1.630862 | -3.677974 |
| 46 | 6 | 0 | 4.937052  | -0.049034 | -3.781675 |
| 47 | 6 | 0 | -3.288148 | 2.075779  | -2.666559 |
| 48 | 6 | 0 | -4.468077 | 2.948913  | -3.141385 |
| 49 | 6 | 0 | -2.240122 | 1.906395  | -3.782413 |
| 50 | 6 | 0 | -4.388959 | -1.287502 | 1.135464  |
| 51 | 6 | 0 | -3.932480 | -2.744057 | 1.339991  |
| 52 | 6 | 0 | -5.810512 | -1.117106 | 1.713506  |
| 53 | 6 | 0 | -5.614453 | -2.274565 | -3.662060 |
| 54 | 6 | 0 | -4.890544 | -3.632147 | -3.741481 |
| 55 | 6 | 0 | -7.119767 | -2.466274 | -3.397744 |
| 56 | 1 | 0 | 4.786398  | 2.110798  | -1.726748 |
| 57 | 1 | 0 | 0.714667  | 6.402113  | 0.555644  |
| 58 | 1 | 0 | -0.057798 | 6.685142  | -0.991161 |
| 59 | 1 | 0 | -1.396416 | 5.163265  | 0.469976  |
| 60 | 1 | 0 | -0.958444 | 4.410120  | -1.053213 |
| 61 | 1 | 0 | 1.076589  | 3.024560  | 2.472510  |
| 62 | 1 | 0 | 1.672356  | 4.527443  | 1.785170  |
| 63 | 1 | 0 | 0.321804  | 4.832720  | 3.907594  |
| 64 | 1 | 0 | -0.243957 | 5.779365  | 2.549128  |
| 65 | 1 | 0 | 4.998461  | 4.260078  | -2.733021 |
| 66 | 1 | 0 | 4.208897  | 6.601406  | -3.023050 |
| 67 | 1 | 0 | 2.092027  | 7.315129  | -1.926888 |
| 68 | 1 | 0 | -4.932310 | 1.594022  | 1.322526  |
| 69 | 1 | 0 | -1.938344 | 5.231232  | 4.830509  |
| 70 | 1 | 0 | -4.263004 | 4.382136  | 5.069854  |
| 71 | 1 | 0 | -5.165766 | 2.801306  | 3.375762  |
| 72 | 1 | 0 | -5.386959 | -2.594739 | -0.946781 |
| 73 | 1 | 0 | -4.437095 | 0.138106  | -4.083119 |
| 74 | 1 | 0 | 5.258945  | -1.723811 | 2.064149  |
| 75 | 1 | 0 | 5.081249  | -2.577682 | -2.116436 |
| 76 | 1 | 0 | 3.342034  | 1.459808  | 1.793393  |
| 77 | 1 | 0 | 5.802093  | 1.787935  | 1.709875  |
| 78 | 1 | 0 | 5.178234  | 1.941037  | 3.364120  |
| 79 | 1 | 0 | 6.030745  | 0.468550  | 2.868380  |
| 80 | 1 | 0 | 2.310248  | -0.468824 | 2.968160  |
| 81 | 1 | 0 | 3.127730  | 0.629930  | 4.092962  |
| 82 | 1 | 0 | 3.882230  | -0.908267 | 3.661907  |
| 83 | 1 | 0 | 7.446971  | -3.278591 | -1.484961 |
| 84 | 1 | 0 | 8.155968  | -4.228341 | -0.167604 |
| 85 | 1 | 0 | 8.010208  | -2.464844 | -0.017668 |
| 86 | 1 | 0 | 4.491205  | -5.003250 | 0.236347  |
| 87 | 1 | 0 | 5.290747  | -4.824687 | -1.334066 |
| 88 | 1 | 0 | 6.097309  | -5.706088 | -0.029639 |
| 89 | 1 | 0 | 2.995525  | 0.372393  | -2.954983 |
| 90 | 1 | 0 | 2.072206  | -1.919917 | -3.150458 |

|     |    |   |           |           |           |
|-----|----|---|-----------|-----------|-----------|
| 91  | 1  | 0 | 2.697478  | -1.323510 | -4.691404 |
| 92  | 1  | 0 | 3.627508  | -2.512367 | -3.776194 |
| 93  | 1  | 0 | 5.461828  | 0.801410  | -3.334295 |
| 94  | 1  | 0 | 4.646621  | 0.232556  | -4.801065 |
| 95  | 1  | 0 | 5.655357  | -0.874711 | -3.855745 |
| 96  | 1  | 0 | -2.806938 | 2.621605  | -1.851905 |
| 97  | 1  | 0 | -5.191963 | 3.110450  | -2.334617 |
| 98  | 1  | 0 | -4.108365 | 3.929248  | -3.477699 |
| 99  | 1  | 0 | -5.000701 | 2.483821  | -3.979261 |
| 100 | 1  | 0 | -1.398233 | 1.298440  | -3.440229 |
| 101 | 1  | 0 | -1.854191 | 2.885827  | -4.091223 |
| 102 | 1  | 0 | -2.669444 | 1.429482  | -4.671699 |
| 103 | 1  | 0 | -3.707473 | -0.658507 | 1.713581  |
| 104 | 1  | 0 | -2.950462 | -2.922459 | 0.898901  |
| 105 | 1  | 0 | -3.867000 | -2.967078 | 2.411592  |
| 106 | 1  | 0 | -4.640127 | -3.459656 | 0.903302  |
| 107 | 1  | 0 | -6.179797 | -0.090394 | 1.621966  |
| 108 | 1  | 0 | -5.828277 | -1.390198 | 2.775832  |
| 109 | 1  | 0 | -6.523014 | -1.765812 | 1.189422  |
| 110 | 1  | 0 | -4.972670 | -4.180101 | -2.794847 |
| 111 | 1  | 0 | -5.326622 | -4.259625 | -4.528459 |
| 112 | 1  | 0 | -3.825320 | -3.497843 | -3.959518 |
| 113 | 1  | 0 | -7.295414 | -2.959160 | -2.434069 |
| 114 | 1  | 0 | -7.643540 | -1.504274 | -3.379865 |
| 115 | 1  | 0 | -7.574590 | -3.089012 | -4.177773 |
| 116 | 8  | 0 | -0.982559 | 1.137870  | -0.828913 |
| 117 | 8  | 0 | 1.104918  | 0.771591  | 0.546442  |
| 118 | 15 | 0 | 0.016595  | -0.057369 | -0.352320 |
| 119 | 8  | 0 | 0.619381  | -0.670439 | -1.585542 |
| 120 | 8  | 0 | -0.675450 | -0.986009 | 0.647867  |
| 121 | 1  | 0 | -0.657826 | -2.269008 | 0.530507  |
| 122 | 6  | 0 | 0.143417  | -3.881196 | -0.933474 |
| 123 | 8  | 0 | -0.657229 | -3.416226 | 0.456340  |
| 124 | 6  | 0 | 0.125645  | -4.065636 | 1.513033  |
| 125 | 6  | 0 | 1.593973  | -3.806824 | -0.433015 |
| 126 | 1  | 0 | 2.118797  | -4.683039 | -0.820690 |
| 127 | 1  | 0 | 2.069157  | -2.916577 | -0.846316 |
| 128 | 8  | 0 | -0.285559 | -3.085133 | -1.905842 |
| 129 | 8  | 0 | -0.234997 | -5.172322 | -1.101248 |
| 130 | 6  | 0 | -1.540086 | -5.387613 | -1.668511 |
| 131 | 1  | 0 | -1.705167 | -6.464132 | -1.605543 |
| 132 | 1  | 0 | -1.565627 | -5.059857 | -2.709809 |
| 133 | 1  | 0 | -2.301643 | -4.852879 | -1.094360 |
| 134 | 1  | 0 | 0.092261  | -2.147377 | -1.837091 |
| 135 | 6  | 0 | -0.310052 | -3.690807 | 2.909653  |
| 136 | 6  | 0 | -0.226544 | -2.381652 | 3.406816  |
| 137 | 6  | 0 | -0.782049 | -4.704728 | 3.753819  |
| 138 | 6  | 0 | -0.610657 | -2.102183 | 4.717951  |
| 139 | 1  | 0 | 0.102470  | -1.574227 | 2.762132  |
| 140 | 6  | 0 | -1.155810 | -4.426807 | 5.069076  |
| 141 | 1  | 0 | -0.855148 | -5.722839 | 3.377952  |
| 142 | 6  | 0 | -1.071152 | -3.121686 | 5.554087  |
| 143 | 1  | 0 | -0.550440 | -1.081549 | 5.085671  |
| 144 | 1  | 0 | -1.516487 | -5.227437 | 5.709253  |
| 145 | 1  | 0 | -1.365310 | -2.898555 | 6.576243  |
| 146 | 1  | 0 | -0.073067 | -5.130035 | 1.365219  |
| 147 | 6  | 0 | 1.577024  | -3.763602 | 1.113324  |
| 148 | 1  | 0 | 2.263704  | -4.484858 | 1.565952  |
| 149 | 1  | 0 | 1.866977  | -2.770381 | 1.467452  |
| 150 | 1  | 0 | 6.262992  | -3.634026 | 1.323838  |
| 151 | 1  | 0 | -5.512453 | -1.791606 | -4.643647 |

TS-2nd-(S)-reaction pathway: S-re/(S)-1ca (SPHENOL)

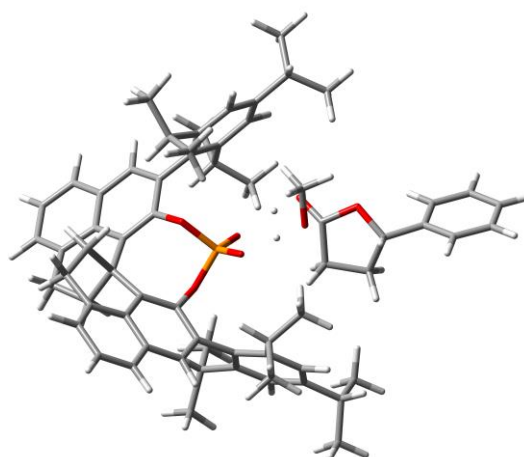

B3LYP/6-31G(d); E(RB3LYP) = -3429.49046166 Hartree  
 Zero-point correction= 1.290670 Hartree  
 Thermal correction to Energy= 1.361657 Hartree  
 Thermal correction to Enthalpy= 1.362601 Hartree  
 Thermal correction to Gibbs Free Energy= 1.182452 Hartree  
 Sum of electronic and zero-point Energies= -3428.199791 Hartree  
 Sum of electronic and thermal Energies= -3428.128804 Hartree  
 Sum of electronic and thermal Enthalpies= -3428.127860 Hartree  
 Sum of electronic and thermal Free Energies= -3428.308010 Hartree  
 The number of Imaginary frequencies = 1

| Center Number | Atomic Number | Atomic Type | Coordinates (Angstroms) |           |           |
|---------------|---------------|-------------|-------------------------|-----------|-----------|
|               |               |             | X                       | Y         | Z         |
| 1             | 6             | 0           | 4.019010                | -2.279593 | -1.673120 |
| 2             | 6             | 0           | 3.346099                | -1.406348 | -0.726958 |
| 3             | 6             | 0           | 2.137113                | -1.854300 | -0.217375 |
| 4             | 6             | 0           | 1.595222                | -3.160173 | -0.451452 |
| 5             | 6             | 0           | 2.296132                | -3.994588 | -1.287553 |
| 6             | 6             | 0           | 3.469821                | -3.574462 | -1.954339 |
| 7             | 6             | 0           | 5.232339                | -1.927696 | -2.345111 |
| 8             | 6             | 0           | 5.916487                | -0.616974 | -2.056718 |
| 9             | 6             | 0           | 4.990891                | 0.386199  | -1.383144 |
| 10            | 6             | 0           | 4.182417                | -0.207004 | -0.184495 |
| 11            | 6             | 0           | 5.095562                | -0.915107 | 0.870482  |
| 12            | 6             | 0           | 6.217260                | -0.039046 | 1.406202  |
| 13            | 6             | 0           | 5.710667                | 1.298837  | 1.871321  |
| 14            | 6             | 0           | 4.462806                | 1.804660  | 1.386387  |
| 15            | 6             | 0           | 3.593825                | 1.071389  | 0.483121  |
| 16            | 6             | 0           | 4.104709                | -4.445471 | -2.876255 |
| 17            | 6             | 0           | 5.254113                | -4.064217 | -3.525720 |
| 18            | 6             | 0           | 5.808874                | -2.799593 | -3.251775 |
| 19            | 6             | 0           | 4.088434                | 3.123288  | 1.810774  |
| 20            | 6             | 0           | 2.897770                | 3.703448  | 1.319658  |
| 21            | 6             | 0           | 2.037439                | 3.019335  | 0.495022  |
| 22            | 6             | 0           | 2.415820                | 1.694932  | 0.101441  |
| 23            | 6             | 0           | 6.478545                | 2.044143  | 2.747596  |
| 24            | 6             | 0           | 6.087747                | 3.328396  | 3.173151  |
| 25            | 6             | 0           | 4.912461                | 3.859798  | 2.700568  |
| 26            | 6             | 0           | 0.335112                | -3.648867 | 0.205127  |
| 27            | 6             | 0           | 0.766147                | 3.676404  | 0.042700  |
| 28            | 6             | 0           | -0.211003               | 4.070218  | 0.997828  |
| 29            | 6             | 0           | -1.369499               | 4.714301  | 0.551536  |
| 30            | 6             | 0           | -1.612788               | 4.978403  | -0.797554 |
| 31            | 6             | 0           | -0.628958               | 4.604746  | -1.713889 |
| 32            | 6             | 0           | 0.559136                | 3.972064  | -1.326472 |
| 33            | 6             | 0           | 0.275798                | -3.794054 | 1.615730  |
| 34            | 6             | 0           | -0.882337               | -4.312997 | 2.202461  |
| 35            | 6             | 0           | -1.990618               | -4.708049 | 1.450675  |

|     |   |   |           |           |           |     |    |   |            |           |           |
|-----|---|---|-----------|-----------|-----------|-----|----|---|------------|-----------|-----------|
| 36  | 6 | 0 | -1.908528 | -4.569979 | 0.064921  | 105 | 1  | 0 | -1.061922  | 2.995220  | 4.225656  |
| 37  | 6 | 0 | -0.775605 | -4.055784 | -0.581566 | 106 | 1  | 0 | -2.185086  | 3.651172  | 3.031017  |
| 38  | 6 | 0 | 1.456022  | -3.477885 | 2.535625  | 107 | 1  | 0 | 1.027237   | 5.753346  | 2.816124  |
| 39  | 6 | 0 | 2.015891  | -4.765091 | 3.175092  | 108 | 1  | 0 | 0.351303   | 5.046820  | 4.296326  |
| 40  | 6 | 0 | 1.096827  | -2.434054 | 3.609747  | 109 | 1  | 0 | -0.707151  | 5.857928  | 3.130215  |
| 41  | 6 | 0 | -3.225421 | -5.317243 | 2.102973  | 110 | 1  | 0 | -4.238461  | 5.168217  | 0.378542  |
| 42  | 6 | 0 | -3.829955 | -4.412285 | 3.191780  | 111 | 1  | 0 | -5.048935  | 5.497653  | -1.156883 |
| 43  | 6 | 0 | -2.926335 | -6.721676 | 2.663820  | 112 | 1  | 0 | -4.189158  | 3.960082  | -0.907511 |
| 44  | 6 | 0 | -0.788554 | -4.014557 | -2.113191 | 113 | 1  | 0 | -2.796958  | 7.343493  | 0.162692  |
| 45  | 6 | 0 | -2.034797 | -3.324914 | -2.698456 | 114 | 1  | 0 | -1.953583  | 7.668034  | -1.359469 |
| 46  | 6 | 0 | -0.670480 | -5.436609 | -2.703116 | 115 | 1  | 0 | -3.728534  | 7.700371  | -1.302988 |
| 47  | 6 | 0 | 1.616229  | 3.706407  | -2.399283 | 116 | 8  | 0 | 1.381503   | -1.037446 | 0.622966  |
| 48  | 6 | 0 | 2.189418  | 5.032714  | -2.939625 | 117 | 8  | 0 | 1.547900   | 1.044149  | -0.773863 |
| 49  | 6 | 0 | 1.091794  | 2.823226  | -3.546399 | 118 | 15 | 0 | 0.421546   | 0.059363  | -0.112249 |
| 50  | 6 | 0 | -0.054279 | 3.859676  | 2.508131  | 119 | 8  | 0 | -0.391280  | 0.715364  | 0.974649  |
| 51  | 6 | 0 | -1.239638 | 3.113147  | 3.149461  | 120 | 8  | 0 | -0.313005  | -0.539210 | -1.304852 |
| 52  | 6 | 0 | 0.170485  | 5.207220  | 3.226410  | 121 | 1  | 0 | -1.627805  | -0.186602 | -1.513184 |
| 53  | 6 | 0 | -2.880111 | 5.684926  | -1.261361 | 122 | 6  | 0 | -3.360862  | 0.526688  | -0.172223 |
| 54  | 6 | 0 | -4.161607 | 5.035793  | -0.707113 | 123 | 8  | 0 | -4.638791  | 0.805271  | -0.511663 |
| 55  | 6 | 0 | -2.836198 | 7.188234  | -0.922271 | 124 | 8  | 0 | -2.661846  | 0.090021  | -1.696018 |
| 56  | 1 | 0 | 1.940381  | -5.005703 | -1.457218 | 125 | 6  | 0 | -5.397168  | -0.439257 | -0.555664 |
| 57  | 1 | 0 | 6.791514  | -0.802738 | -1.417148 | 126 | 6  | 0 | -4.755379  | -1.279485 | 0.568188  |
| 58  | 1 | 0 | 6.315576  | -0.189270 | -2.985338 | 127 | 6  | 0 | -3.287670  | -0.809513 | 0.578272  |
| 59  | 1 | 0 | 5.570369  | 1.250123  | -1.044713 | 128 | 1  | 0 | -5.206871  | -0.906022 | -1.529453 |
| 60  | 1 | 0 | 4.259128  | 0.764144  | -2.107301 | 129 | 1  | 0 | -5.248177  | -1.048717 | 1.517789  |
| 61  | 1 | 0 | 4.447445  | -1.229581 | 1.697898  | 130 | 1  | 0 | -4.861741  | -2.351020 | 0.382354  |
| 62  | 1 | 0 | 5.516397  | -1.827920 | 0.440796  | 131 | 1  | 0 | -2.898234  | -0.631981 | 1.582797  |
| 63  | 1 | 0 | 6.731519  | -0.554425 | 2.227318  | 132 | 1  | 0 | -2.615932  | -1.513336 | 0.086045  |
| 64  | 1 | 0 | 6.978843  | 0.111695  | 0.627209  | 133 | 8  | 0 | -2.715080  | 1.597341  | 0.232167  |
| 65  | 1 | 0 | 3.655111  | -5.417652 | -3.062770 | 134 | 6  | 0 | -2.684771  | 1.159600  | -2.664220 |
| 66  | 1 | 0 | 5.733517  | -4.726119 | -4.241773 | 135 | 1  | 0 | -2.189125  | 2.050130  | -2.268768 |
| 67  | 1 | 0 | 6.720718  | -2.494641 | -3.761258 | 136 | 1  | 0 | -2.166292  | 0.799923  | -3.555583 |
| 68  | 1 | 0 | 2.658433  | 4.720767  | 1.614296  | 137 | 1  | 0 | -3.727750  | 1.378785  | -2.895852 |
| 69  | 1 | 0 | 7.413602  | 1.622282  | 3.110395  | 138 | 1  | 0 | -1.786477  | 1.335775  | 0.564764  |
| 70  | 1 | 0 | 6.713476  | 3.888150  | 3.862930  | 139 | 6  | 0 | -6.867007  | -0.144783 | -0.402062 |
| 71  | 1 | 0 | 4.587960  | 4.852593  | 3.002304  | 140 | 6  | 0 | -7.801638  | -0.887454 | -1.131112 |
| 72  | 1 | 0 | -2.112979 | 5.009072  | 1.286823  | 141 | 6  | 0 | -7.319449  | 0.829697  | 0.496931  |
| 73  | 1 | 0 | -0.783502 | 4.834720  | -2.766433 | 142 | 6  | 0 | -9.169813  | -0.672524 | -0.956965 |
| 74  | 1 | 0 | -0.907946 | -4.429002 | 3.282941  | 143 | 1  | 0 | -7.458024  | -1.637376 | -1.840467 |
| 75  | 1 | 0 | -2.754254 | -4.893415 | -0.538271 | 144 | 6  | 0 | -8.685679  | 1.052509  | 0.662381  |
| 76  | 1 | 0 | 2.261475  | -3.054646 | 1.931628  | 145 | 1  | 0 | -6.597468  | 1.424137  | 1.048730  |
| 77  | 1 | 0 | 2.314894  | -5.490700 | 2.410226  | 146 | 6  | 0 | -9.614500  | 0.299245  | -0.060024 |
| 78  | 1 | 0 | 2.895609  | -4.535646 | 3.788793  | 147 | 1  | 0 | -9.885339  | -1.257199 | -1.528736 |
| 79  | 1 | 0 | 1.275419  | -5.249135 | 3.822933  | 148 | 1  | 0 | -9.026142  | 1.817196  | 1.355373  |
| 80  | 1 | 0 | 0.720022  | -1.515356 | 3.151801  | 149 | 1  | 0 | -10.678872 | 0.473935  | 0.071621  |
| 81  | 1 | 0 | 1.983547  | -2.182431 | 4.204481  | 150 | 1  | 0 | -3.982081  | -5.434757 | 1.314256  |
| 82  | 1 | 0 | 0.335316  | -2.812144 | 4.302777  | 151 | 1  | 0 | -2.912610  | 5.597770  | -2.356702 |
| 83  | 1 | 0 | -3.136694 | -4.274330 | 4.029552  |     |    |   |            |           |           |
| 84  | 1 | 0 | -4.749667 | -4.854026 | 3.593676  |     |    |   |            |           |           |
| 85  | 1 | 0 | -4.073609 | -3.419921 | 2.796412  |     |    |   |            |           |           |
| 86  | 1 | 0 | -2.537452 | -7.384236 | 1.883020  |     |    |   |            |           |           |
| 87  | 1 | 0 | -2.178231 | -6.674753 | 3.464096  |     |    |   |            |           |           |
| 88  | 1 | 0 | -3.833882 | -7.176743 | 3.079074  |     |    |   |            |           |           |
| 89  | 1 | 0 | 0.075829  | -3.434997 | -2.444917 |     |    |   |            |           |           |
| 90  | 1 | 0 | -2.139280 | -2.303599 | -2.327908 |     |    |   |            |           |           |
| 91  | 1 | 0 | -1.952409 | -3.279143 | -3.791347 |     |    |   |            |           |           |
| 92  | 1 | 0 | -2.956598 | -3.872913 | -2.467871 |     |    |   |            |           |           |
| 93  | 1 | 0 | 0.215665  | -5.965186 | -2.337114 |     |    |   |            |           |           |
| 94  | 1 | 0 | -0.611620 | -5.394827 | -3.797639 |     |    |   |            |           |           |
| 95  | 1 | 0 | -1.544390 | -6.044285 | -2.438183 |     |    |   |            |           |           |
| 96  | 1 | 0 | 2.448289  | 3.170420  | -1.936606 |     |    |   |            |           |           |
| 97  | 1 | 0 | 2.607229  | 5.641885  | -2.130294 |     |    |   |            |           |           |
| 98  | 1 | 0 | 2.987773  | 4.838384  | -3.666475 |     |    |   |            |           |           |
| 99  | 1 | 0 | 1.418290  | 5.629050  | -3.441702 |     |    |   |            |           |           |
| 100 | 1 | 0 | 0.726197  | 1.865378  | -3.165160 |     |    |   |            |           |           |
| 101 | 1 | 0 | 1.894818  | 2.618828  | -4.265280 |     |    |   |            |           |           |
| 102 | 1 | 0 | 0.279267  | 3.313570  | -4.096724 |     |    |   |            |           |           |
| 103 | 1 | 0 | 0.829148  | 3.240660  | 2.677879  |     |    |   |            |           |           |
| 104 | 1 | 0 | -1.351109 | 2.118352  | 2.714544  |     |    |   |            |           |           |

Optimized structure of Oxa-SPINOL-derived CPA (S)-1da

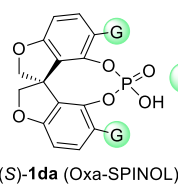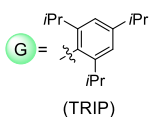

distance: 4.67 Å (-2.3%)  
 angle: 101.8° (+2.2%)  
 dihedral: 55.7° (-9.0%)

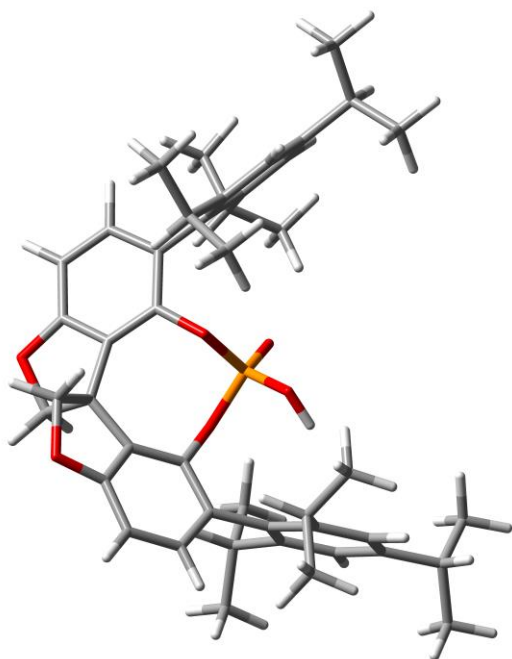

B3LYP/6-31G(d); E(RB3LYP) = -2540.72833210 Hartree  
 Zero-point correction= 0.912841 Hartree  
 Thermal correction to Energy= 0.965045 Hartree  
 Thermal correction to Enthalpy= 0.965990 Hartree  
 Thermal correction to Gibbs Free Energy= 0.826596 Hartree  
 Sum of electronic and zero-point Energies= -2539.815491 Hartree  
 Sum of electronic and thermal Energies= -2539.763287 Hartree  
 Sum of electronic and thermal Enthalpies= -2539.762342 Hartree  
 Sum of electronic and thermal Free Energies= -2539.901736 Hartree  
 The number of Imaginary frequencies = 0

| Center Number | Atomic Number | Atomic Type | Coordinates (Angstroms) |           |           |
|---------------|---------------|-------------|-------------------------|-----------|-----------|
|               |               |             | X                       | Y         | Z         |
| 1             | 1             | 0           | -1.545245               | -1.457118 | 0.753893  |
| 2             | 6             | 0           | 1.216625                | 2.771616  | -0.480932 |
| 3             | 6             | 0           | 1.773777                | 1.528077  | -0.212392 |
| 4             | 6             | 0           | 3.755797                | 2.176230  | -1.396628 |
| 5             | 6             | 0           | 3.178965                | 3.389463  | -1.785141 |
| 6             | 6             | 0           | 1.895918                | 3.651833  | -1.329395 |
| 7             | 1             | 0           | 4.766749                | 1.950341  | -1.720590 |
| 8             | 1             | 0           | 3.703951                | 4.092323  | -2.422873 |
| 9             | 6             | 0           | -0.032307               | 3.493346  | -0.017906 |
| 10            | 6             | 0           | -0.204328               | 4.443966  | -1.234417 |
| 11            | 1             | 0           | -0.717897               | 3.937737  | -2.061354 |
| 12            | 1             | 0           | -0.712223               | 5.378569  | -0.989992 |
| 13            | 6             | 0           | 0.199492                | 4.367022  | 1.250093  |
| 14            | 1             | 0           | 0.724609                | 3.798946  | 2.027923  |
| 15            | 1             | 0           | 0.725925                | 5.300457  | 1.045059  |
| 16            | 6             | 0           | -1.914392               | 3.627046  | 1.375515  |
| 17            | 6             | 0           | -1.300703               | 2.801509  | 0.427240  |
| 18            | 6             | 0           | -3.171284               | 3.346819  | 1.891776  |
| 19            | 1             | 0           | -3.648315               | 4.013737  | 2.601584  |

|    |    |   |           |           |           |
|----|----|---|-----------|-----------|-----------|
| 20 | 6  | 0 | -1.893874 | 1.592900  | 0.102217  |
| 21 | 6  | 0 | -3.774221 | 2.150737  | 1.488316  |
| 22 | 1  | 0 | -4.754434 | 1.901984  | 1.882417  |
| 23 | 8  | 0 | 1.010334  | 0.598787  | 0.509202  |
| 24 | 8  | 0 | -1.241553 | 0.745480  | -0.790356 |
| 25 | 15 | 0 | -0.070524 | -0.286347 | -0.317248 |
| 26 | 8  | 0 | -0.666771 | -1.074892 | 0.945873  |
| 27 | 8  | 0 | 0.401838  | -1.049532 | -1.483124 |
| 28 | 6  | 0 | 3.075023  | 1.202952  | -0.643434 |
| 29 | 6  | 0 | -3.148162 | 1.226540  | 0.635089  |
| 30 | 6  | 0 | -3.756302 | -0.115461 | 0.344100  |
| 31 | 6  | 0 | -3.892268 | -1.081350 | 1.380922  |
| 32 | 6  | 0 | -4.192456 | -0.435500 | -0.968347 |
| 33 | 6  | 0 | -4.425862 | -2.339285 | 1.062875  |
| 34 | 6  | 0 | -4.722874 | -1.704413 | -1.219312 |
| 35 | 6  | 0 | -4.841564 | -2.678463 | -0.224929 |
| 36 | 1  | 0 | -4.530288 | -3.079395 | 1.852369  |
| 37 | 1  | 0 | -5.055312 | -1.937105 | -2.227473 |
| 38 | 6  | 0 | 3.736306  | -0.103547 | -0.313044 |
| 39 | 6  | 0 | 4.119577  | -0.382474 | 1.023595  |
| 40 | 6  | 0 | 4.028496  | -1.039343 | -1.335867 |
| 41 | 6  | 0 | 4.775341  | -1.584177 | 1.305750  |
| 42 | 6  | 0 | 4.696614  | -2.221508 | -0.993610 |
| 43 | 6  | 0 | 5.076161  | -2.520839 | 0.314056  |
| 44 | 1  | 0 | 5.067579  | -1.789086 | 2.332819  |
| 45 | 1  | 0 | 4.924153  | -2.940447 | -1.777019 |
| 46 | 6  | 0 | 3.665771  | -0.814161 | -2.805051 |
| 47 | 6  | 0 | 4.923548  | -0.515430 | -3.647180 |
| 48 | 6  | 0 | 2.882948  | -1.994394 | -3.411814 |
| 49 | 1  | 0 | 3.009940  | 0.058880  | -2.862404 |
| 50 | 1  | 0 | 5.612173  | -1.369113 | -3.643838 |
| 51 | 1  | 0 | 5.475421  | 0.352262  | -3.268278 |
| 52 | 1  | 0 | 1.976693  | -2.191969 | -2.835797 |
| 53 | 1  | 0 | 3.486114  | -2.909397 | -3.451547 |
| 54 | 6  | 0 | 3.888441  | 0.597417  | 2.174830  |
| 55 | 6  | 0 | 3.009916  | -0.009209 | 3.285645  |
| 56 | 6  | 0 | 5.224002  | 1.116115  | 2.744582  |
| 57 | 1  | 0 | 3.355900  | 1.468368  | 1.783178  |
| 58 | 1  | 0 | 3.498367  | -0.866884 | 3.763130  |
| 59 | 1  | 0 | 2.048722  | -0.345839 | 2.885717  |
| 60 | 1  | 0 | 5.831024  | 1.588295  | 1.963988  |
| 61 | 1  | 0 | 5.817242  | 0.304667  | 3.182121  |
| 62 | 6  | 0 | -3.542932 | -0.796010 | 2.846823  |
| 63 | 6  | 0 | -4.829594 | -0.578459 | 3.671831  |
| 64 | 6  | 0 | -2.681531 | -1.889672 | 3.509165  |
| 65 | 1  | 0 | -2.963446 | 0.130299  | 2.884536  |
| 66 | 1  | 0 | -5.435561 | -1.491945 | 3.700095  |
| 67 | 1  | 0 | -5.455053 | 0.216761  | 3.252686  |
| 68 | 1  | 0 | -1.735221 | -2.041486 | 2.982059  |
| 69 | 1  | 0 | -3.202964 | -2.852044 | 3.563026  |
| 70 | 6  | 0 | -4.161528 | 0.574541  | -2.115580 |
| 71 | 6  | 0 | -3.381389 | 0.057308  | -3.338974 |
| 72 | 6  | 0 | -5.592415 | 0.996727  | -2.507542 |
| 73 | 1  | 0 | -3.651794 | 1.475046  | -1.763785 |
| 74 | 1  | 0 | -3.870758 | -0.811223 | -3.795559 |
| 75 | 1  | 0 | -2.361257 | -0.229426 | -3.067628 |
| 76 | 1  | 0 | -6.133715 | 1.413005  | -1.650481 |
| 77 | 1  | 0 | -6.171462 | 0.146539  | -2.887129 |
| 78 | 1  | 0 | 4.648392  | -0.312455 | -4.689385 |
| 79 | 1  | 0 | 2.590057  | -1.753253 | -4.441194 |
| 80 | 1  | 0 | 5.043656  | 1.858531  | 3.531792  |
| 81 | 1  | 0 | 2.815365  | 0.735590  | 4.067433  |
| 82 | 1  | 0 | -2.440992 | -1.594556 | 4.537084  |
| 83 | 1  | 0 | -4.582084 | -0.307224 | 4.705043  |
| 84 | 1  | 0 | -3.324308 | 0.839110  | -4.105872 |
| 85 | 1  | 0 | -5.563763 | 1.759238  | -3.295136 |
| 86 | 6  | 0 | -5.409840 | -4.059559 | -0.522750 |
| 87 | 6  | 0 | -4.537018 | -4.831849 | -1.530253 |
| 88 | 1  | 0 | -3.503745 | -4.918145 | -1.177080 |

|    |   |   |           |           |           |     |   |   |           |           |           |
|----|---|---|-----------|-----------|-----------|-----|---|---|-----------|-----------|-----------|
| 89 | 1 | 0 | -4.930703 | -5.843441 | -1.684699 | 100 | 6 | 0 | 4.964135  | -4.714528 | 1.583715  |
| 90 | 1 | 0 | -4.515021 | -4.330561 | -2.505028 | 101 | 1 | 0 | 5.469429  | -5.672622 | 1.756248  |
| 91 | 6 | 0 | -6.872945 | -3.987246 | -0.999302 | 102 | 1 | 0 | 4.820384  | -4.233485 | 2.558590  |
| 92 | 1 | 0 | -7.503772 | -3.469920 | -0.268182 | 103 | 1 | 0 | 3.973291  | -4.920328 | 1.164630  |
| 93 | 1 | 0 | -6.956134 | -3.450635 | -1.951818 | 104 | 8 | 0 | 1.150151  | 4.759423  | -1.641094 |
| 94 | 1 | 0 | -7.279117 | -4.994547 | -1.149230 | 105 | 8 | 0 | -1.130975 | 4.692739  | 1.725466  |
| 95 | 6 | 0 | 5.793337  | -3.824687 | 0.638455  | 106 | 1 | 0 | -5.399218 | -4.621959 | 0.420963  |
| 96 | 6 | 0 | 7.204213  | -3.580020 | 1.206223  | 107 | 1 | 0 | 5.910640  | -4.371016 | -0.307514 |
| 97 | 1 | 0 | 7.161480  | -3.048975 | 2.164678  |     |   |   |           |           |           |
| 98 | 1 | 0 | 7.723642  | -4.530951 | 1.376046  |     |   |   |           |           |           |
| 99 | 1 | 0 | 7.808898  | -2.978473 | 0.518677  |     |   |   |           |           |           |

DFT calculation for all conformations of real system using Oxa-SPINOL-derived CPA (*S*)-1da

| TS            | Orientation I | Orientation II | $\Delta\Delta G^\ddagger$ (a.u.) | $\Delta\Delta G^\ddagger$ (kcal/mmol) |
|---------------|---------------|----------------|----------------------------------|---------------------------------------|
| <i>R-anti</i> | up            | up             |                                  |                                       |
|               | up            | down           |                                  |                                       |
|               | down          | up             | -3192.968059                     | -2.08                                 |
|               | down          | down           |                                  |                                       |
| <i>S-anti</i> | up            | up             | -3192.961634                     | 1.95                                  |
|               | up            | down           | -3192.961495                     | 2.04                                  |
|               | down          | up             | -3192.960879                     | 2.43                                  |
|               | down          | down           | -3192.962941                     | 1.13                                  |
| <i>S-syn</i>  | up            | up             | -3192.961417                     | 2.09                                  |
|               | up            | down           | -3192.961902                     | 1.79                                  |
|               | down          | down           | -3192.961517                     | 2.03                                  |
|               | down          | up             | -3192.961841                     | 1.82                                  |

  

| TS          | Orientation I | Orientation II | $\Delta\Delta G^\ddagger$ (a.u.) | $\Delta\Delta G^\ddagger$ (kcal/mmol) |
|-------------|---------------|----------------|----------------------------------|---------------------------------------|
| <i>R-re</i> | up            | up             | -3192.964749                     | 0.00                                  |
|             | up            | down           | -3192.964557                     | 0.12                                  |
|             | down          | up             | -3192.964200                     | 0.34                                  |
|             | down          | down           | -3192.964032                     | 0.45                                  |
| <i>S-si</i> | up            | up             | -3192.962941                     | 1.13                                  |
|             | up            | down           |                                  |                                       |
|             | down          | up             |                                  |                                       |
|             | down          | down           |                                  |                                       |
| <i>S-re</i> | up            | up             | -3192.964942                     | -0.12                                 |
|             | up            | down           |                                  |                                       |
|             | down          | up             |                                  |                                       |
|             | down          | down           |                                  |                                       |

\* Assignments of "up" and "down" are shown in ESI page S55.

DFT calculation of real system using Oxa-SPINOL-derived CPA (*S*)-1da

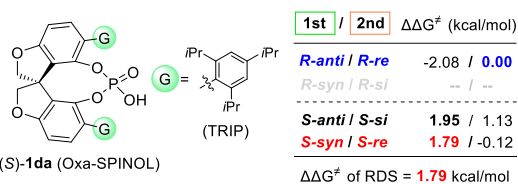

B3LYP/6-31G(d); E(RB3LYP) = -3194.01120632 Hartree  
 Zero-point correction= 1.146457 Hartree  
 Thermal correction to Energy= 1.211877 Hartree  
 Thermal correction to Enthalpy= 1.212821 Hartree  
 Thermal correction to Gibbs Free Energy= 1.043148 Hartree  
 Sum of electronic and zero-point Energies= -3192.864750 Hartree  
 Sum of electronic and thermal Energies= -3192.799329 Hartree  
 Sum of electronic and thermal Enthalpies= -3192.798385 Hartree  
 Sum of electronic and thermal Free Energies= -3192.968059 Hartree  
 The number of Imaginary frequencies = 1

TS-1st-(*R*)-reaction pathway: *R-anti*/(*S*)-1da (Oxa-SPINOL)

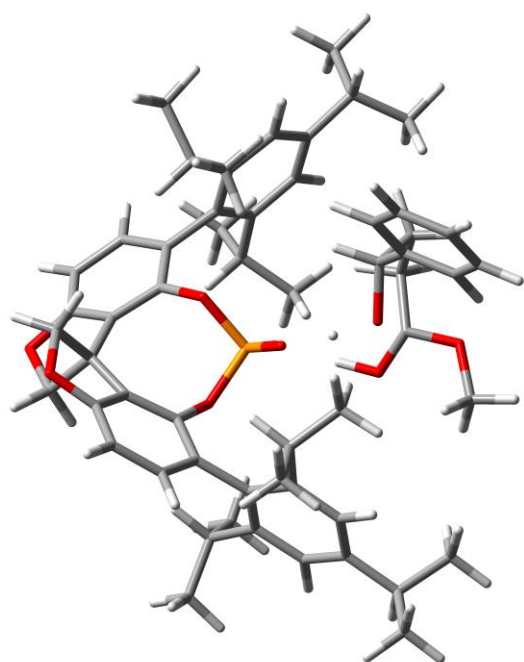

| Center Number | Atomic Number | Atomic Type | Coordinates (Angstroms) |           |           |
|---------------|---------------|-------------|-------------------------|-----------|-----------|
|               |               |             | X                       | Y         | Z         |
| 1             | 6             | 0           | -0.157910               | 3.007882  | -1.631295 |
| 2             | 8             | 0           | 0.214615                | 2.771753  | -0.000964 |
| 3             | 6             | 0           | -0.923240               | 3.187276  | 0.819763  |
| 4             | 6             | 0           | -1.938584               | 3.785150  | -0.177387 |
| 5             | 6             | 0           | -1.670818               | 3.053840  | -1.492805 |
| 6             | 1             | 0           | -1.336938               | 2.272593  | 1.256419  |
| 7             | 1             | 0           | -1.769420               | 4.859208  | -0.295462 |
| 8             | 1             | 0           | -2.959730               | 3.637670  | 0.183568  |
| 9             | 1             | 0           | -2.095964               | 3.563089  | -2.361996 |
| 10            | 1             | 0           | -2.052934               | 2.029225  | -1.466261 |
| 11            | 8             | 0           | 0.440341                | 2.032724  | -2.303658 |
| 12            | 8             | 0           | 0.343063                | 4.232129  | -1.905431 |
| 13            | 6             | 0           | 1.759179                | 4.305095  | -2.153489 |
| 14            | 1             | 0           | 1.980205                | 5.369600  | -2.240833 |
| 15            | 1             | 0           | 2.013913                | 3.787009  | -3.080181 |
| 16            | 1             | 0           | 2.316200                | 3.868969  | -1.320054 |
| 17            | 1             | 0           | 0.453995                | 1.682549  | 0.252612  |
| 18            | 1             | 0           | 0.030154                | 1.127831  | -2.107573 |
| 19            | 6             | 0           | -1.198977               | -3.709149 | 0.520731  |
| 20            | 6             | 0           | -1.789644               | -2.464449 | 0.350115  |
| 21            | 6             | 0           | -3.735278               | -3.549200 | -0.556550 |
| 22            | 6             | 0           | -3.122065               | -4.803927 | -0.497992 |
| 23            | 6             | 0           | -1.838856               | -4.849677 | 0.024725  |
| 24            | 1             | 0           | -4.747481               | -3.480598 | -0.942808 |
| 25            | 1             | 0           | -3.618269               | -5.700183 | -0.854047 |

|    |    |   |           |           |           |     |   |   |           |           |           |
|----|----|---|-----------|-----------|-----------|-----|---|---|-----------|-----------|-----------|
| 26 | 6  | 0 | 0.071004  | -4.176484 | 1.194929  | 95  | 1 | 0 | 5.695837  | -0.255880 | 2.899625  |
| 27 | 6  | 0 | 0.280272  | -5.491282 | 0.390928  | 96  | 1 | 0 | 2.460696  | 2.236050  | 1.392544  |
| 28 | 1  | 0 | 0.789466  | -5.293019 | -0.560514 | 97  | 1 | 0 | 4.035214  | 2.965229  | 1.758014  |
| 29 | 1  | 0 | 0.811734  | -6.263804 | 0.949231  | 98  | 6 | 0 | 3.933469  | -2.523716 | -2.025612 |
| 30 | 6  | 0 | -0.111318 | -4.552728 | 2.691831  | 99  | 6 | 0 | 3.050538  | -2.327484 | -3.272974 |
| 31 | 1  | 0 | -0.618777 | -3.749174 | 3.240414  | 100 | 6 | 0 | 5.203135  | -3.330598 | -2.363961 |
| 32 | 1  | 0 | -0.631444 | -5.500160 | 2.843786  | 101 | 1 | 0 | 3.359859  | -3.125672 | -1.316580 |
| 33 | 6  | 0 | 2.000516  | -3.822073 | 2.463799  | 102 | 1 | 0 | 3.575195  | -1.763396 | -4.053458 |
| 34 | 6  | 0 | 1.330992  | -3.351584 | 1.330083  | 103 | 1 | 0 | 2.131306  | -1.790251 | -3.022188 |
| 35 | 6  | 0 | 3.294252  | -3.427964 | 2.767407  | 104 | 1 | 0 | 5.811184  | -3.506977 | -1.469469 |
| 36 | 1  | 0 | 3.815980  | -3.821880 | 3.632851  | 105 | 1 | 0 | 5.830682  | -2.808866 | -3.096031 |
| 37 | 6  | 0 | 1.901254  | -2.340397 | 0.569252  | 106 | 1 | 0 | -4.610413 | -2.450141 | -4.518563 |
| 38 | 6  | 0 | 3.889106  | -2.498372 | 1.908681  | 107 | 1 | 0 | -2.656036 | -0.895573 | -4.769139 |
| 39 | 1  | 0 | 4.912775  | -2.193452 | 2.100141  | 108 | 1 | 0 | -5.129475 | -1.606522 | 3.946039  |
| 40 | 8  | 0 | -1.085734 | -1.334689 | 0.754916  | 109 | 1 | 0 | -3.003180 | -0.234448 | 4.076634  |
| 41 | 8  | 0 | 1.161511  | -1.798214 | -0.478377 | 110 | 1 | 0 | 3.008998  | 2.379250  | 3.069008  |
| 42 | 15 | 0 | 0.037954  | -0.638275 | -0.218222 | 111 | 1 | 0 | 4.962105  | 1.001209  | 3.910932  |
| 43 | 8  | 0 | 0.618030  | 0.474655  | 0.654054  | 112 | 1 | 0 | 2.773567  | -3.299613 | -3.699448 |
| 44 | 8  | 0 | -0.523607 | -0.272332 | -1.564577 | 113 | 1 | 0 | 4.935059  | -4.304843 | -2.790876 |
| 45 | 6  | 0 | -3.093755 | -2.355980 | -0.179292 | 114 | 6 | 0 | 6.277409  | 1.920169  | -2.392900 |
| 46 | 6  | 0 | 3.218973  | -1.903880 | 0.824501  | 115 | 6 | 0 | 7.672729  | 2.144073  | -1.779598 |
| 47 | 6  | 0 | -0.479930 | 4.120387  | 1.921790  | 116 | 1 | 0 | 8.204827  | 1.195071  | -1.652322 |
| 48 | 6  | 0 | -0.807553 | 3.838568  | 3.251462  | 117 | 1 | 0 | 8.279777  | 2.793268  | -2.422332 |
| 49 | 6  | 0 | 0.240693  | 5.286781  | 1.629429  | 118 | 1 | 0 | 7.602784  | 2.621393  | -0.794894 |
| 50 | 6  | 0 | -0.433500 | 4.711959  | 4.275370  | 119 | 6 | 0 | 5.555508  | 3.261128  | -2.622051 |
| 51 | 1  | 0 | -1.355228 | 2.929418  | 3.488488  | 120 | 1 | 0 | 4.582091  | 3.105606  | -3.100415 |
| 52 | 6  | 0 | 0.621749  | 6.154326  | 2.650727  | 121 | 1 | 0 | 5.385779  | 3.787746  | -1.675041 |
| 53 | 1  | 0 | 0.506369  | 5.504690  | 0.598694  | 122 | 1 | 0 | 6.152017  | 3.918724  | -3.266106 |
| 54 | 6  | 0 | 0.282608  | 5.870745  | 3.976991  | 123 | 6 | 0 | -6.291561 | 2.519526  | -0.742093 |
| 55 | 1  | 0 | -0.695532 | 4.481018  | 5.304391  | 124 | 6 | 0 | -5.793217 | 3.567327  | -1.752307 |
| 56 | 1  | 0 | 1.184386  | 7.053494  | 2.413620  | 125 | 1 | 0 | -5.768152 | 3.166422  | -2.772209 |
| 57 | 1  | 0 | 0.579456  | 6.549147  | 4.772361  | 126 | 1 | 0 | -6.459597 | 4.437881  | -1.759659 |
| 58 | 6  | 0 | 3.928499  | -0.884888 | -0.019809 | 127 | 1 | 0 | -4.784709 | 3.916435  | -1.505337 |
| 59 | 6  | 0 | 4.327137  | 0.358938  | 0.537556  | 128 | 6 | 0 | -7.728604 | 2.076219  | -1.085215 |
| 60 | 6  | 0 | 4.281625  | -1.193936 | -1.356106 | 129 | 1 | 0 | -8.405803 | 2.938509  | -1.116584 |
| 61 | 6  | 0 | 5.078138  | 1.242353  | -0.245130 | 130 | 1 | 0 | -7.762493 | 1.584700  | -2.064923 |
| 62 | 6  | 0 | 5.023697  | -0.264571 | -2.094841 | 131 | 1 | 0 | -8.111093 | 1.366979  | -0.343342 |
| 63 | 6  | 0 | 5.442072  | 0.953915  | -1.562803 | 132 | 1 | 0 | -6.325915 | 3.003657  | 0.244044  |
| 64 | 1  | 0 | 5.390620  | 2.186740  | 0.193437  | 133 | 1 | 0 | 6.422857  | 1.455385  | -3.377764 |
| 65 | 1  | 0 | 5.299154  | -0.507340 | -3.118924 | 134 | 8 | 0 | 1.238515  | -4.692355 | 3.200077  |
| 66 | 6  | 0 | -3.818487 | -1.050074 | -0.331335 | 135 | 8 | 0 | -1.059028 | -5.971970 | 0.116846  |
| 67 | 6  | 0 | -4.259460 | -0.344117 | 0.814368  |     |   |   |           |           |           |
| 68 | 6  | 0 | -4.147812 | -0.560997 | -1.622565 |     |   |   |           |           |           |
| 69 | 6  | 0 | -5.013491 | 0.824163  | 0.645062  |     |   |   |           |           |           |
| 70 | 6  | 0 | -4.921479 | 0.600873  | -1.730390 |     |   |   |           |           |           |
| 71 | 6  | 0 | -5.372429 | 1.309837  | -0.613667 |     |   |   |           |           |           |
| 72 | 1  | 0 | -5.364623 | 1.356114  | 1.527273  |     |   |   |           |           |           |
| 73 | 1  | 0 | -5.189355 | 0.953150  | -2.722997 |     |   |   |           |           |           |
| 74 | 6  | 0 | -3.723737 | -1.266600 | -2.913269 |     |   |   |           |           |           |
| 75 | 6  | 0 | -4.935267 | -1.903202 | -3.625243 |     |   |   |           |           |           |
| 76 | 6  | 0 | -2.966226 | -0.335406 | -3.878661 |     |   |   |           |           |           |
| 77 | 1  | 0 | -3.032809 | -2.070518 | -2.647461 |     |   |   |           |           |           |
| 78 | 1  | 0 | -5.654263 | -1.139303 | -3.945453 |     |   |   |           |           |           |
| 79 | 1  | 0 | -5.469522 | -2.605055 | -2.975472 |     |   |   |           |           |           |
| 80 | 1  | 0 | -2.068821 | 0.064441  | -3.402018 |     |   |   |           |           |           |
| 81 | 1  | 0 | -3.590139 | 0.499625  | -4.219883 |     |   |   |           |           |           |
| 82 | 6  | 0 | -4.007330 | -0.840046 | 2.238878  |     |   |   |           |           |           |
| 83 | 6  | 0 | -3.178215 | 0.159122  | 3.067806  |     |   |   |           |           |           |
| 84 | 6  | 0 | -5.329421 | -1.188524 | 2.951935  |     |   |   |           |           |           |
| 85 | 1  | 0 | -3.428171 | -1.764921 | 2.180178  |     |   |   |           |           |           |
| 86 | 1  | 0 | -3.694898 | 1.121078  | 3.174500  |     |   |   |           |           |           |
| 87 | 1  | 0 | -2.203751 | 0.334770  | 2.600977  |     |   |   |           |           |           |
| 88 | 1  | 0 | -5.903014 | -1.927543 | 2.381599  |     |   |   |           |           |           |
| 89 | 1  | 0 | -5.963844 | -0.304298 | 3.084735  |     |   |   |           |           |           |
| 90 | 6  | 0 | 3.986196  | 0.776569  | 1.970169  |     |   |   |           |           |           |
| 91 | 6  | 0 | 5.230769  | 0.735394  | 2.881169  |     |   |   |           |           |           |
| 92 | 6  | 0 | 3.334936  | 2.170642  | 2.043053  |     |   |   |           |           |           |
| 93 | 1  | 0 | 3.255691  | 0.064954  | 2.364061  |     |   |   |           |           |           |
| 94 | 1  | 0 | 5.991178  | 1.448345  | 2.539682  |     |   |   |           |           |           |

TS-2nd-(R)-reaction pathway: R-re/(S)-1da (Oxa-SPINOL)

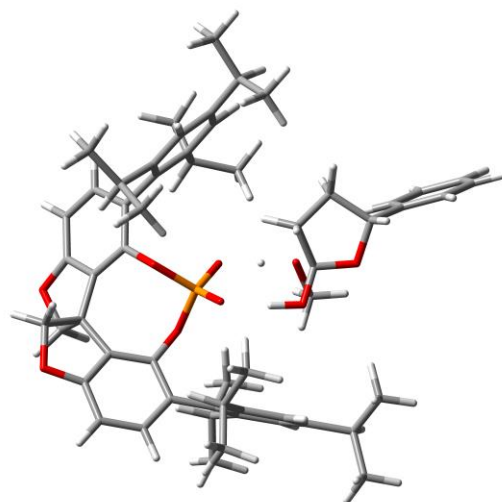

B3LYP/6-31G(d); E(RB3LYP) = -3194.00903732 Hartree  
 Zero-point correction = 1.147386 Hartree  
 Thermal correction to Energy = 1.212762 Hartree  
 Thermal correction to Enthalpy = 1.213706 Hartree

|                                              |                      |        |                         |           |           |           |           |   |
|----------------------------------------------|----------------------|--------|-------------------------|-----------|-----------|-----------|-----------|---|
| Thermal correction to Gibbs Free Energy=     | 1.044288 Hartree     | 60     | 6                       | 0         | -2.246809 | -3.584838 | 1.250928  |   |
| Sum of electronic and zero-point Energies=   | -3192.861651 Hartree | 61     | 6                       | 0         | -4.268196 | -2.433519 | -0.290554 |   |
| Sum of electronic and thermal Energies=      | -3192.796276 Hartree | 62     | 6                       | 0         | -3.484851 | -3.252151 | 1.810088  |   |
| Sum of electronic and thermal Enthalpies=    | -3192.795331 Hartree | 63     | 6                       | 0         | -4.514990 | -2.680160 | 1.060397  |   |
| Sum of electronic and thermal Free Energies= | -3192.964749 Hartree | 64     | 1                       | 0         | -5.061790 | -1.993230 | -0.890441 |   |
| The number of Imaginary frequencies = 1      |                      | 65     | 1                       | 0         | -3.651512 | -3.463605 | 2.863369  |   |
|                                              |                      | 66     | 6                       | 0         | 3.722139  | 1.700857  | 0.268026  |   |
| Center                                       | Atomic               | Atomic | Coordinates (Angstroms) |           |           | 67        | 6         | 0 |
| Number                                       | Number               | Type   | X                       | Y         | Z         | 68        | 6         | 0 |
| 1                                            | 6                    | 0      | -1.625562               | 2.430322  | 0.608113  | 69        | 6         | 0 |
| 2                                            | 8                    | 0      | -2.317557               | 3.589961  | 0.509965  | 70        | 6         | 0 |
| 3                                            | 8                    | 0      | -1.499834               | 1.907643  | -1.001033 | 71        | 6         | 0 |
| 4                                            | 6                    | 0      | -3.748080               | 3.373397  | 0.761468  | 72        | 1         | 0 |
| 5                                            | 6                    | 0      | -3.914460               | 1.840750  | 0.797359  | 73        | 1         | 0 |
| 6                                            | 6                    | 0      | -2.521895               | 1.353207  | 1.207925  | 74        | 6         | 0 |
| 7                                            | 1                    | 0      | -3.932490               | 3.796462  | 1.755665  | 75        | 6         | 0 |
| 8                                            | 1                    | 0      | -4.177779               | 1.458376  | -0.191957 | 76        | 6         | 0 |
| 9                                            | 1                    | 0      | -4.701615               | 1.543297  | 1.495047  | 77        | 1         | 0 |
| 10                                           | 1                    | 0      | -2.277243               | 0.347894  | 0.864653  | 78        | 1         | 0 |
| 11                                           | 1                    | 0      | -2.377259               | 1.389757  | 2.293494  | 79        | 1         | 0 |
| 12                                           | 8                    | 0      | -0.390068               | 2.633477  | 1.034451  | 80        | 1         | 0 |
| 13                                           | 6                    | 0      | -0.756157               | 2.822567  | -1.837936 | 81        | 1         | 0 |
| 14                                           | 1                    | 0      | -1.314338               | 3.757737  | -1.888461 | 82        | 6         | 0 |
| 15                                           | 1                    | 0      | -0.687077               | 2.365172  | -2.826828 | 83        | 6         | 0 |
| 16                                           | 1                    | 0      | 0.241438                | 2.996190  | -1.427057 | 84        | 6         | 0 |
| 17                                           | 1                    | 0      | -0.988204               | 0.927698  | -1.013583 | 85        | 1         | 0 |
| 18                                           | 1                    | 0      | 0.082870                | 1.747262  | 1.174112  | 86        | 1         | 0 |
| 19                                           | 6                    | 0      | 3.721626                | -2.092372 | -0.162177 | 87        | 1         | 0 |
| 20                                           | 6                    | 0      | 3.312608                | -0.767522 | -0.211055 | 88        | 1         | 0 |
| 21                                           | 6                    | 0      | 5.356912                | -0.125380 | 0.880263  | 89        | 1         | 0 |
| 22                                           | 6                    | 0      | 5.748728                | -1.459693 | 1.031078  | 90        | 6         | 0 |
| 23                                           | 6                    | 0      | 4.892765                | -2.426014 | 0.525278  | 91        | 6         | 0 |
| 24                                           | 1                    | 0      | 6.008035                | 0.655917  | 1.260293  | 92        | 6         | 0 |
| 25                                           | 1                    | 0      | 6.668715                | -1.731062 | 1.537392  | 93        | 1         | 0 |
| 26                                           | 6                    | 0      | 3.161572                | -3.375947 | -0.731245 | 94        | 1         | 0 |
| 27                                           | 6                    | 0      | 3.785420                | -4.364277 | 0.295697  | 95        | 1         | 0 |
| 28                                           | 1                    | 0      | 3.170602                | -4.427334 | 1.202394  | 96        | 1         | 0 |
| 29                                           | 1                    | 0      | 3.961697                | -5.361810 | -0.110432 | 97        | 1         | 0 |
| 30                                           | 6                    | 0      | 3.710438                | -3.738792 | -2.138638 | 98        | 6         | 0 |
| 31                                           | 1                    | 0      | 3.618079                | -2.890574 | -2.828473 | 99        | 6         | 0 |
| 32                                           | 1                    | 0      | 4.738588                | -4.104621 | -2.125340 | 100       | 6         | 0 |
| 33                                           | 6                    | 0      | 1.632025                | -4.582502 | -2.022463 | 101       | 1         | 0 |
| 34                                           | 6                    | 0      | 1.693899                | -3.632166 | -0.997680 | 102       | 1         | 0 |
| 35                                           | 6                    | 0      | 0.443345                | -5.196835 | -2.384939 | 103       | 1         | 0 |
| 36                                           | 1                    | 0      | 0.414103                | -5.954930 | -3.160055 | 104       | 1         | 0 |
| 37                                           | 6                    | 0      | 0.515615                | -3.160482 | -0.434653 | 105       | 1         | 0 |
| 38                                           | 6                    | 0      | -0.711795               | -4.786013 | -1.712098 | 106       | 1         | 0 |
| 39                                           | 1                    | 0      | -1.654335               | -5.267048 | -1.953248 | 107       | 1         | 0 |
| 40                                           | 8                    | 0      | 2.096934                | -0.472646 | -0.817209 | 108       | 1         | 0 |
| 41                                           | 8                    | 0      | 0.578967                | -2.124540 | 0.490947  | 109       | 1         | 0 |
| 42                                           | 15                   | 0      | 0.680662                | -0.562430 | 0.009255  | 110       | 1         | 0 |
| 43                                           | 8                    | 0      | -0.369005               | -0.261642 | -1.056753 | 111       | 1         | 0 |
| 44                                           | 8                    | 0      | 0.681407                | 0.258211  | 1.269113  | 112       | 1         | 0 |
| 45                                           | 6                    | 0      | 4.133311                | 0.258929  | 0.305207  | 113       | 1         | 0 |
| 46                                           | 6                    | 0      | -0.725031               | -3.749156 | -0.763085 | 114       | 6         | 0 |
| 47                                           | 6                    | 0      | -4.582359               | 4.115610  | -0.253814 | 115       | 6         | 0 |
| 48                                           | 6                    | 0      | -5.464314               | 5.115857  | 0.166662  | 116       | 1         | 0 |
| 49                                           | 6                    | 0      | -4.502523               | 3.810801  | -1.620417 | 117       | 1         | 0 |
| 50                                           | 6                    | 0      | -6.261688               | 5.797137  | -0.755459 | 118       | 1         | 0 |
| 51                                           | 1                    | 0      | -5.527360               | 5.365455  | 1.223471  | 119       | 6         | 0 |
| 52                                           | 6                    | 0      | -5.290706               | 4.495480  | -2.543133 | 120       | 1         | 0 |
| 53                                           | 1                    | 0      | -3.819737               | 3.036584  | -1.958932 | 121       | 1         | 0 |
| 54                                           | 6                    | 0      | -6.174729               | 5.489075  | -2.112655 | 122       | 1         | 0 |
| 55                                           | 1                    | 0      | -6.943942               | 6.570240  | -0.412717 | 123       | 6         | 0 |
| 56                                           | 1                    | 0      | -5.218288               | 4.252392  | -3.599839 | 124       | 6         | 0 |
| 57                                           | 1                    | 0      | -6.790740               | 6.019845  | -2.833459 | 125       | 1         | 0 |
| 58                                           | 6                    | 0      | -2.018285               | -3.329966 | -0.125758 | 126       | 1         | 0 |
| 59                                           | 6                    | 0      | -3.046813               | -2.740825 | -0.904463 | 127       | 1         | 0 |
|                                              |                      |        |                         |           |           | 128       | 6         | 0 |

|     |   |   |           |           |           |
|-----|---|---|-----------|-----------|-----------|
| 129 | 1 | 0 | -6.778439 | -1.216466 | 3.287576  |
| 130 | 1 | 0 | -5.242040 | -1.970453 | 3.733139  |
| 131 | 1 | 0 | -5.248337 | -0.540225 | 2.692840  |
| 132 | 1 | 0 | 2.286039  | 6.116312  | -0.915202 |
| 133 | 1 | 0 | -6.454080 | -1.825798 | 0.914847  |
| 134 | 8 | 0 | 5.067634  | -3.781417 | 0.635320  |
| 135 | 8 | 0 | 2.854349  | -4.815347 | -2.597082 |

TS-1st-(S)-reaction pathway: *S-anti*/(S)-1da (Oxa-SPINOL)

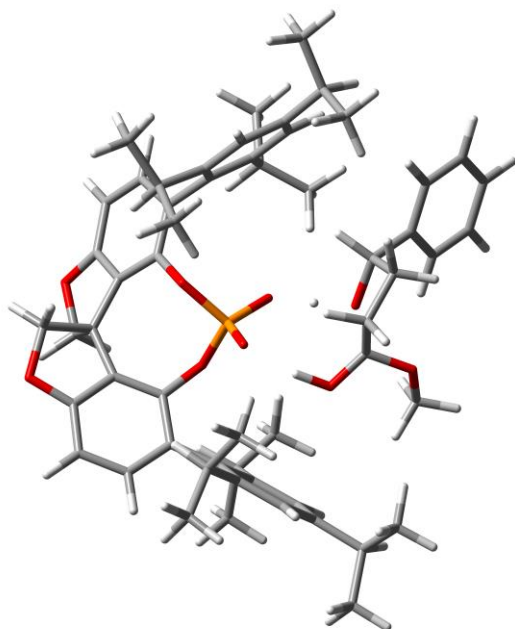

B3LYP/6-31G(d); E(RB3LYP) = -3194.00631468 Hartree  
 Zero-point correction= 1.146421 Hartree  
 Thermal correction to Energy= 1.211682 Hartree  
 Thermal correction to Enthalpy= 1.212627 Hartree  
 Thermal correction to Gibbs Free Energy= 1.044681 Hartree  
 Sum of electronic and zero-point Energies= -3192.859894 Hartree  
 Sum of electronic and thermal Energies= -3192.794632 Hartree  
 Sum of electronic and thermal Enthalpies= -3192.793688 Hartree  
 Sum of electronic and thermal Free Energies= -3192.961634 Hartree  
 The number of Imaginary frequencies = 1

| Center Number | Atomic Number | Atomic Type | Coordinates (Angstroms) |           |           |
|---------------|---------------|-------------|-------------------------|-----------|-----------|
|               |               |             | X                       | Y         | Z         |
| 1             | 6             | 0           | 0.521974                | 3.241343  | 0.563274  |
| 2             | 8             | 0           | -0.695131               | 2.636512  | -0.463089 |
| 3             | 6             | 0           | -1.990815               | 2.954671  | 0.106466  |
| 4             | 6             | 0           | -1.690885               | 3.733670  | 1.414559  |
| 5             | 6             | 0           | -0.298909               | 3.272980  | 1.840154  |
| 6             | 1             | 0           | -2.472630               | 1.999570  | 0.346137  |
| 7             | 1             | 0           | -1.688363               | 4.808738  | 1.215280  |
| 8             | 1             | 0           | -2.450313               | 3.530602  | 2.174651  |
| 9             | 1             | 0           | 0.175130                | 3.947886  | 2.558303  |
| 10            | 1             | 0           | -0.315494               | 2.262395  | 2.259294  |
| 11            | 8             | 0           | 1.556617                | 2.424418  | 0.441228  |
| 12            | 8             | 0           | 0.753875                | 4.482559  | 0.092271  |
| 13            | 6             | 0           | 1.548722                | 4.578502  | -1.103986 |
| 14            | 1             | 0           | 1.569729                | 5.640943  | -1.348958 |
| 15            | 1             | 0           | 2.557965                | 4.201682  | -0.931070 |
| 16            | 1             | 0           | 1.080272                | 4.012868  | -1.914364 |
| 17            | 1             | 0           | -0.585115               | 1.503738  | -0.666376 |
| 18            | 1             | 0           | 1.378849                | 1.531114  | 0.878078  |
| 19            | 6             | 0           | 2.183075                | -3.422954 | -0.313929 |
| 20            | 6             | 0           | 2.472660                | -2.065102 | -0.360859 |

|    |    |   |           |           |           |
|----|----|---|-----------|-----------|-----------|
| 21 | 6  | 0 | 4.658512  | -2.543585 | 0.523456  |
| 22 | 6  | 0 | 4.359835  | -3.899944 | 0.670905  |
| 23 | 6  | 0 | 3.095210  | -4.305029 | 0.275674  |
| 24 | 1  | 0 | 5.640737  | -2.190426 | 0.821462  |
| 25 | 1  | 0 | 5.071043  | -4.600801 | 1.094294  |
| 26 | 6  | 0 | 1.021904  | -4.260876 | -0.797701 |
| 27 | 6  | 0 | 1.164737  | -5.441266 | 0.205241  |
| 28 | 1  | 0 | 0.685048  | -5.203254 | 1.163071  |
| 29 | 1  | 0 | 0.787104  | -6.389391 | -0.181034 |
| 30 | 6  | 0 | 1.206926  | -4.837940 | -2.227451 |
| 31 | 1  | 0 | 1.461424  | -4.046995 | -2.944006 |
| 32 | 1  | 0 | 1.937603  | -5.646734 | -2.280591 |
| 33 | 6  | 0 | -1.001652 | -4.594880 | -1.905821 |
| 34 | 6  | 0 | -0.403537 | -3.776363 | -0.940856 |
| 35 | 6  | 0 | -2.368945 | -4.588008 | -2.131962 |
| 36 | 1  | 0 | -2.825083 | -5.255811 | -2.854642 |
| 37 | 6  | 0 | -1.160628 | -2.794984 | -0.313957 |
| 38 | 8  | 0 | 1.507947  | -1.200070 | -0.873327 |
| 39 | 8  | 0 | -0.534979 | -1.913736 | 0.564170  |
| 40 | 15 | 0 | 0.307246  | -0.603409 | 0.071350  |
| 41 | 8  | 0 | -0.523244 | 0.248928  | -0.892339 |
| 42 | 8  | 0 | 0.829688  | 0.060552  | 1.317221  |
| 43 | 6  | 0 | 3.733872  | -1.589068 | 0.060940  |
| 44 | 6  | 0 | -2.555846 | -2.728599 | -0.519189 |
| 45 | 6  | 0 | -2.859159 | 3.738312  | -0.859302 |
| 46 | 6  | 0 | -2.360804 | 4.270051  | -2.051385 |
| 47 | 6  | 0 | -4.202340 | 3.963023  | -0.526087 |
| 48 | 6  | 0 | -3.189024 | 5.014281  | -2.894769 |
| 49 | 1  | 0 | -1.327369 | 4.088216  | -2.322536 |
| 50 | 6  | 0 | -5.028390 | 4.709056  | -1.366007 |
| 51 | 1  | 0 | -4.606450 | 3.548420  | 0.394453  |
| 52 | 6  | 0 | -4.523218 | 5.238301  | -2.555921 |
| 53 | 1  | 0 | -2.787889 | 5.416758  | -3.821341 |
| 54 | 1  | 0 | -6.067553 | 4.873437  | -1.093053 |
| 55 | 1  | 0 | -5.166340 | 5.816499  | -3.213803 |
| 56 | 6  | 0 | 4.132894  | -0.142297 | 0.073002  |
| 57 | 6  | 0 | 4.318098  | 0.569918  | -1.135912 |
| 58 | 6  | 0 | 4.423615  | 0.494093  | 1.310022  |
| 59 | 6  | 0 | 4.791792  | 1.886692  | -1.082695 |
| 60 | 6  | 0 | 4.907495  | 1.805948  | 1.299332  |
| 61 | 6  | 0 | 5.100792  | 2.525235  | 0.118562  |
| 62 | 1  | 0 | 4.942920  | 2.428266  | -2.014648 |
| 63 | 1  | 0 | 5.136165  | 2.280339  | 2.249855  |
| 64 | 6  | 0 | -3.123154 | -3.669458 | -1.397329 |
| 65 | 1  | 0 | -4.199031 | -3.644956 | -1.540243 |
| 66 | 6  | 0 | -3.432422 | -1.701254 | 0.131810  |
| 67 | 6  | 0 | -4.133790 | -0.763160 | -0.668852 |
| 68 | 6  | 0 | -3.618360 | -1.697136 | 1.537840  |
| 69 | 6  | 0 | -4.989569 | 0.152714  | -0.041914 |
| 70 | 6  | 0 | -4.487934 | -0.761406 | 2.106882  |
| 71 | 6  | 0 | -5.187612 | 0.173101  | 1.339770  |
| 72 | 1  | 0 | -5.529542 | 0.869996  | -0.656075 |
| 73 | 1  | 0 | -4.635492 | -0.779046 | 3.183776  |
| 74 | 6  | 0 | 4.240880  | -0.186144 | 2.670567  |
| 75 | 6  | 0 | 5.595000  | -0.420340 | 3.370720  |
| 76 | 6  | 0 | 3.286955  | 0.595821  | 3.594673  |
| 77 | 1  | 0 | 3.781437  | -1.163501 | 2.505593  |
| 78 | 1  | 0 | 6.095449  | 0.528298  | 3.599544  |
| 79 | 1  | 0 | 6.278705  | -1.010370 | 2.750178  |
| 80 | 1  | 0 | 2.299785  | 0.689395  | 3.136291  |
| 81 | 1  | 0 | 3.667414  | 1.598599  | 3.823383  |
| 82 | 6  | 0 | 4.071266  | -0.053598 | -2.509302 |
| 83 | 6  | 0 | 2.989772  | 0.704338  | -3.302543 |
| 84 | 6  | 0 | 5.378972  | -0.164195 | -3.318636 |
| 85 | 1  | 0 | 3.705583  | -1.072678 | -2.360797 |
| 86 | 1  | 0 | 3.300555  | 1.732725  | -3.524533 |
| 87 | 1  | 0 | 2.048873  | 0.741326  | -2.745805 |
| 88 | 1  | 0 | 6.135345  | -0.739500 | -2.772953 |
| 89 | 1  | 0 | 5.804226  | 0.822630  | -3.536698 |



|     |   |   |           |           |           |
|-----|---|---|-----------|-----------|-----------|
| 90  | 6 | 0 | -2.957451 | -2.716957 | 2.466029  |
| 91  | 6 | 0 | -2.081881 | -2.045147 | 3.540967  |
| 92  | 6 | 0 | -4.007938 | -3.646869 | 3.106535  |
| 93  | 1 | 0 | -2.301054 | -3.351622 | 1.866127  |
| 94  | 1 | 0 | -2.680121 | -1.422533 | 4.217500  |
| 95  | 1 | 0 | -1.311383 | -1.416496 | 3.085372  |
| 96  | 1 | 0 | -4.603603 | -4.158830 | 2.342355  |
| 97  | 1 | 0 | -4.699375 | -3.091508 | 3.751317  |
| 98  | 6 | 0 | -4.028969 | -0.717582 | -2.196233 |
| 99  | 6 | 0 | -5.367987 | -1.104800 | -2.857096 |
| 100 | 6 | 0 | -3.542033 | 0.644205  | -2.722211 |
| 101 | 1 | 0 | -3.285251 | -1.453286 | -2.509010 |
| 102 | 1 | 0 | -6.155630 | -0.379830 | -2.619328 |
| 103 | 1 | 0 | -5.717206 | -2.089191 | -2.524792 |
| 104 | 1 | 0 | -2.553386 | 0.880417  | -2.321122 |
| 105 | 1 | 0 | -4.226586 | 1.459049  | -2.462973 |
| 106 | 1 | 0 | -1.582595 | -2.806491 | 4.152768  |
| 107 | 1 | 0 | -3.518030 | -4.409712 | 3.723906  |
| 108 | 1 | 0 | -3.464252 | 0.614827  | -3.816123 |
| 109 | 1 | 0 | -5.261390 | -1.133556 | -3.948250 |
| 110 | 1 | 0 | 5.449617  | -0.956014 | 4.316681  |
| 111 | 1 | 0 | 3.170481  | 0.063642  | 4.546941  |
| 112 | 1 | 0 | 5.195520  | -0.665985 | -4.276633 |
| 113 | 1 | 0 | 2.799765  | 0.204315  | -4.260246 |
| 114 | 6 | 0 | -6.178649 | 1.144139  | 1.970084  |
| 115 | 6 | 0 | -7.450028 | 0.411740  | 2.443774  |
| 116 | 1 | 0 | -7.215654 | -0.309515 | 3.235751  |
| 117 | 1 | 0 | -8.184161 | 1.122506  | 2.842585  |
| 118 | 1 | 0 | -7.918095 | -0.138260 | 1.620349  |
| 119 | 6 | 0 | -5.565811 | 1.965919  | 3.118419  |
| 120 | 1 | 0 | -5.268899 | 1.326288  | 3.957482  |
| 121 | 1 | 0 | -4.674423 | 2.512780  | 2.789050  |
| 122 | 1 | 0 | -6.289642 | 2.695614  | 3.500342  |
| 123 | 6 | 0 | 5.668432  | 3.939455  | 0.123770  |
| 124 | 6 | 0 | 4.973068  | 4.865950  | 1.137680  |
| 125 | 1 | 0 | 5.181583  | 4.560389  | 2.169634  |
| 126 | 1 | 0 | 5.332147  | 5.895811  | 1.024216  |
| 127 | 1 | 0 | 3.885684  | 4.863847  | 1.006434  |
| 128 | 6 | 0 | 7.192486  | 3.922595  | 0.357681  |
| 129 | 1 | 0 | 7.607101  | 4.937114  | 0.309531  |
| 130 | 1 | 0 | 7.430764  | 3.507475  | 1.344408  |
| 131 | 1 | 0 | 7.701239  | 3.308783  | -0.393560 |
| 132 | 1 | 0 | 5.496847  | 4.358179  | -0.878230 |
| 133 | 1 | 0 | -6.482632 | 1.849751  | 1.184010  |
| 134 | 8 | 0 | 2.591795  | -5.572260 | 0.411141  |
| 135 | 8 | 0 | -0.093819 | -5.381961 | -2.564547 |

TS-2nd-(S)-reaction pathway: S-si/(S)-1da (Oxa-SPINOL)

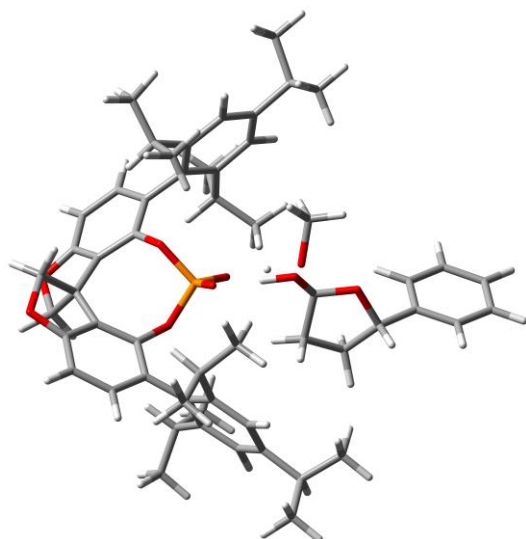

B3LYP/6-31G(d); E(RB3LYP) = -3194.00789230 Hartree  
 Zero-point correction= 1.147579 Hartree  
 Thermal correction to Energy= 1.212879 Hartree  
 Thermal correction to Enthalpy= 1.213824 Hartree  
 Thermal correction to Gibbs Free Energy= 1.044952 Hartree  
 Sum of electronic and zero-point Energies= -3192.860313 Hartree  
 Sum of electronic and thermal Energies= -3192.795013 Hartree  
 Sum of electronic and thermal Enthalpies= -3192.794069 Hartree  
 Sum of electronic and thermal Free Energies= -3192.962941 Hartree  
 The number of Imaginary frequencies = 1

| Center Number | Atomic Number | Atomic Type | Coordinates (Angstroms) |           |           |
|---------------|---------------|-------------|-------------------------|-----------|-----------|
|               |               |             | X                       | Y         | Z         |
| 1             | 6             | 0           | 0.443921                | -4.125428 | -0.025950 |
| 2             | 6             | 0           | 1.237903                | -2.990809 | -0.128412 |
| 3             | 6             | 0           | 3.045430                | -4.213615 | 0.881507  |
| 4             | 6             | 0           | 2.232021                | -5.327329 | 1.108351  |
| 5             | 6             | 0           | 0.922047                | -5.244346 | 0.663605  |
| 6             | 1             | 0           | 4.084336                | -4.256295 | 1.191756  |
| 7             | 1             | 0           | 2.602371                | -6.212835 | 1.613322  |
| 8             | 6             | 0           | -0.918358               | -4.500205 | -0.564310 |
| 9             | 6             | 0           | -1.294161               | -5.567518 | 0.500372  |
| 10            | 1             | 0           | -1.702432               | -5.097026 | 1.403564  |
| 11            | 1             | 0           | -1.979143               | -6.331981 | 0.129607  |
| 12            | 6             | 0           | -0.855077               | -5.208840 | -1.947249 |
| 13            | 1             | 0           | -0.240174               | -4.636988 | -2.653647 |
| 14            | 1             | 0           | -0.505311               | -6.241121 | -1.892564 |
| 15            | 6             | 0           | -2.801041               | -4.094543 | -1.887761 |
| 16            | 6             | 0           | -2.029106               | -3.521853 | -0.871577 |
| 17            | 6             | 0           | -4.012517               | -3.551473 | -2.285873 |
| 18            | 1             | 0           | -4.618504               | -4.023513 | -3.051526 |
| 19            | 6             | 0           | -2.390623               | -2.287287 | -0.348057 |
| 20            | 6             | 0           | -4.402746               | -2.361987 | -1.665397 |
| 21            | 1             | 0           | -5.353261               | -1.916896 | -1.942725 |
| 22            | 8             | 0           | 0.692753                | -1.845542 | -0.701700 |
| 23            | 8             | 0           | -1.561436               | -1.697878 | 0.597870  |
| 24            | 15            | 0           | -0.229248               | -0.827490 | 0.200653  |
| 25            | 8             | 0           | -0.589524               | 0.284662  | -0.781667 |
| 26            | 8             | 0           | 0.426774                | -0.460678 | 1.501148  |
| 27            | 6             | 0           | 2.580889                | -3.016551 | 0.307149  |
| 28            | 6             | 0           | -3.607068               | -1.678445 | -0.727928 |
| 29            | 6             | 0           | 3.530758                | -1.862492 | 0.161553  |
| 30            | 6             | 0           | 3.966957                | -1.455627 | -1.123457 |
| 31            | 6             | 0           | 4.083669                | -1.242557 | 1.314058  |
| 32            | 6             | 0           | 4.946046                | -0.458798 | -1.225618 |
| 33            | 6             | 0           | 5.073949                | -0.266684 | 1.150375  |
| 34            | 6             | 0           | 5.529119                | 0.138221  | -0.107636 |
| 35            | 1             | 0           | 5.288729                | -0.158883 | -2.213847 |
| 36            | 1             | 0           | 5.509405                | 0.182624  | 2.039219  |
| 37            | 6             | 0           | -4.085791               | -0.362051 | -0.189761 |
| 38            | 6             | 0           | -4.269677               | 0.736670  | -1.068295 |
| 39            | 6             | 0           | -4.449761               | -0.230609 | 1.174941  |
| 40            | 6             | 0           | -4.830023               | 1.918759  | -0.565357 |
| 41            | 6             | 0           | -4.987542               | 0.980556  | 1.623639  |
| 42            | 6             | 0           | -5.199861               | 2.067539  | 0.772095  |
| 43            | 1             | 0           | -4.991019               | 2.753825  | -1.244510 |
| 44            | 1             | 0           | -5.272691               | 1.065361  | 2.669356  |
| 45            | 6             | 0           | 1.085825                | 2.689173  | 0.885636  |
| 46            | 8             | 0           | 1.267164                | 4.020211  | 1.077436  |
| 47            | 8             | 0           | -0.300190               | 2.600543  | -0.040726 |
| 48            | 1             | 0           | 0.693714                | 1.079390  | 1.873201  |
| 49            | 6             | 0           | 2.221736                | 4.566590  | 0.108016  |
| 50            | 6             | 0           | 2.449176                | 3.427329  | -0.906087 |
| 51            | 6             | 0           | 2.147668                | 2.174393  | -0.079219 |
| 52            | 1             | 0           | 3.140341                | 4.752696  | 0.676824  |
| 53            | 1             | 0           | 1.751144                | 3.516120  | -1.742954 |
| 54            | 1             | 0           | 3.465285                | 3.446372  | -1.308852 |
| 55            | 1             | 0           | 1.818100                | 1.318118  | -0.667443 |

|     |   |   |           |           |           |
|-----|---|---|-----------|-----------|-----------|
| 56  | 1 | 0 | 3.008109  | 1.861599  | 0.521280  |
| 57  | 8 | 0 | 0.815599  | 2.071623  | 2.030641  |
| 58  | 6 | 0 | -1.479136 | 3.055651  | 0.665202  |
| 59  | 1 | 0 | -2.321033 | 2.956442  | -0.019381 |
| 60  | 1 | 0 | -1.646849 | 2.453328  | 1.560298  |
| 61  | 1 | 0 | -1.316734 | 4.099244  | 0.936353  |
| 62  | 6 | 0 | 1.715526  | 5.871910  | -0.455977 |
| 63  | 6 | 0 | 0.498845  | 5.937260  | -1.150231 |
| 64  | 6 | 0 | 2.473487  | 7.037235  | -0.306254 |
| 65  | 6 | 0 | 0.054546  | 7.145819  | -1.682478 |
| 66  | 1 | 0 | -0.099396 | 5.038322  | -1.269422 |
| 67  | 6 | 0 | 2.034250  | 8.247789  | -0.846658 |
| 68  | 1 | 0 | 3.414049  | 6.998694  | 0.238766  |
| 69  | 6 | 0 | 0.822596  | 8.304396  | -1.534488 |
| 70  | 1 | 0 | -0.891461 | 7.184898  | -2.215973 |
| 71  | 1 | 0 | 2.635691  | 9.144368  | -0.723609 |
| 72  | 1 | 0 | 0.475501  | 9.245476  | -1.952464 |
| 73  | 1 | 0 | -0.444244 | 1.551253  | -0.367350 |
| 74  | 6 | 0 | -4.338621 | -1.379740 | 2.177635  |
| 75  | 6 | 0 | -3.408910 | -1.034085 | 3.356447  |
| 76  | 6 | 0 | -5.729745 | -1.820040 | 2.676865  |
| 77  | 1 | 0 | -3.902422 | -2.240329 | 1.665404  |
| 78  | 1 | 0 | -3.796290 | -0.192458 | 3.943470  |
| 79  | 1 | 0 | -2.405640 | -0.776195 | 3.004963  |
| 80  | 1 | 0 | -6.379741 | -2.104301 | 1.841627  |
| 81  | 1 | 0 | -6.232273 | -1.019996 | 3.233193  |
| 82  | 6 | 0 | -3.897959 | 0.695734  | -2.553463 |
| 83  | 6 | 0 | -5.148932 | 0.780571  | -3.451420 |
| 84  | 6 | 0 | -2.887141 | 1.793341  | -2.938371 |
| 85  | 1 | 0 | -3.409867 | -0.260457 | -2.755645 |
| 86  | 1 | 0 | -5.668421 | 1.737951  | -3.323973 |
| 87  | 1 | 0 | -5.867344 | -0.014978 | -3.224803 |
| 88  | 1 | 0 | -1.964187 | 1.689038  | -2.362500 |
| 89  | 1 | 0 | -3.293091 | 2.799719  | -2.777489 |
| 90  | 6 | 0 | 3.661123  | -1.606149 | 2.739954  |
| 91  | 6 | 0 | 4.770933  | -2.382804 | 3.478699  |
| 92  | 6 | 0 | 3.250400  | -0.373209 | 3.567122  |
| 93  | 1 | 0 | 2.781018  | -2.250958 | 2.676482  |
| 94  | 1 | 0 | 5.673352  | -1.769439 | 3.591214  |
| 95  | 1 | 0 | 5.059169  | -3.296596 | 2.948591  |
| 96  | 1 | 0 | 2.469864  | 0.200439  | 3.064325  |
| 97  | 1 | 0 | 4.099344  | 0.294289  | 3.758614  |
| 98  | 6 | 0 | 3.462249  | -2.098353 | -2.416019 |
| 99  | 6 | 0 | 2.755469  | -1.080662 | -3.331591 |
| 100 | 6 | 0 | 4.600096  | -2.822097 | -3.163872 |
| 101 | 1 | 0 | 2.724845  | -2.860627 | -2.153732 |
| 102 | 1 | 0 | 3.437874  | -0.284043 | -3.652298 |
| 103 | 1 | 0 | 1.902599  | -0.621705 | -2.822431 |
| 104 | 1 | 0 | 5.079593  | -3.572337 | -2.525184 |
| 105 | 1 | 0 | 5.375889  | -2.122711 | -3.497070 |
| 106 | 1 | 0 | 2.861133  | -0.691665 | 4.541439  |
| 107 | 1 | 0 | 4.434574  | -2.667737 | 4.482918  |
| 108 | 1 | 0 | 4.209154  | -3.331885 | -4.052842 |
| 109 | 1 | 0 | 2.382283  | -1.577533 | -4.235553 |
| 110 | 1 | 0 | -4.868868 | 0.692198  | -4.508082 |
| 111 | 1 | 0 | -2.631619 | 1.710700  | -4.001885 |
| 112 | 1 | 0 | -3.320473 | -1.892761 | 4.033151  |
| 113 | 1 | 0 | -5.639182 | -2.683720 | 3.346778  |
| 114 | 6 | 0 | 6.658521  | 1.149279  | -0.266128 |
| 115 | 6 | 0 | 6.385422  | 2.477771  | 0.461608  |
| 116 | 1 | 0 | 6.307079  | 2.335579  | 1.545670  |
| 117 | 1 | 0 | 7.198606  | 3.190668  | 0.280397  |
| 118 | 1 | 0 | 5.451395  | 2.936074  | 0.116571  |
| 119 | 6 | 0 | 8.005661  | 0.549363  | 0.183830  |
| 120 | 1 | 0 | 8.825152  | 1.257325  | 0.009792  |
| 121 | 1 | 0 | 7.991374  | 0.308123  | 1.253395  |
| 122 | 1 | 0 | 8.228504  | -0.373288 | -0.362706 |
| 123 | 6 | 0 | -5.840297 | 3.358706  | 1.266439  |
| 124 | 6 | 0 | -5.043448 | 4.011858  | 2.410801  |

|     |   |   |           |           |           |
|-----|---|---|-----------|-----------|-----------|
| 125 | 1 | 0 | -5.505286 | 4.960147  | 2.710539  |
| 126 | 1 | 0 | -5.009633 | 3.365715  | 3.295662  |
| 127 | 1 | 0 | -4.010018 | 4.219587  | 2.111123  |
| 128 | 6 | 0 | -7.308719 | 3.136750  | 1.678667  |
| 129 | 1 | 0 | -7.776629 | 4.083940  | 1.973173  |
| 130 | 1 | 0 | -7.890344 | 2.709459  | 0.854629  |
| 131 | 1 | 0 | -7.381247 | 2.449132  | 2.529626  |
| 132 | 1 | 0 | -5.840174 | 4.062289  | 0.422208  |
| 133 | 1 | 0 | 6.741805  | 1.373510  | -1.338664 |
| 134 | 8 | 0 | -2.225365 | -5.219682 | -2.416493 |
| 135 | 8 | 0 | -0.036716 | -6.209418 | 0.829087  |

TS-1st-(S)-reaction pathway: S-syn/(S)-1da (Oxa-SPINOL)

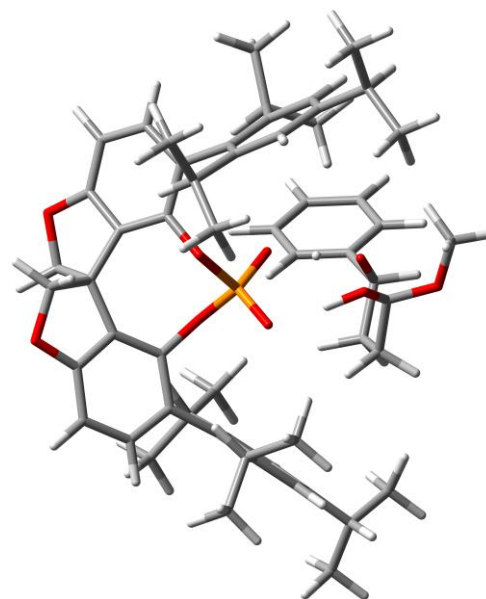

B3LYP/6-31G(d); E(RB3LYP) = -3194.00462938 Hartree

Zero-point correction= 1.146396 Hartree  
 Thermal correction to Energy= 1.211920 Hartree  
 Thermal correction to Enthalpy= 1.212864 Hartree  
 Thermal correction to Gibbs Free Energy= 1.042727 Hartree  
 Sum of electronic and zero-point Energies= -3192.858233 Hartree  
 Sum of electronic and thermal Energies= -3192.792710 Hartree  
 Sum of electronic and thermal Enthalpies= -3192.791766 Hartree  
 Sum of electronic and thermal Free Energies= -3192.961902 Hartree  
 The number of Imaginary frequencies = 1

| Center Number | Atomic Number | Atomic Type | Coordinates (Angstroms) |          |           |
|---------------|---------------|-------------|-------------------------|----------|-----------|
|               |               |             | X                       | Y        | Z         |
| 1             | 6             | 0           | -1.355021               | 3.108208 | 1.314884  |
| 2             | 6             | 0           | -1.949957               | 2.086587 | 0.589279  |
| 3             | 6             | 0           | -3.867264               | 2.227252 | 2.027736  |
| 4             | 6             | 0           | -3.237898               | 3.163945 | 2.854409  |
| 5             | 6             | 0           | -1.966954               | 3.573410 | 2.482292  |
| 6             | 1             | 0           | -4.876853               | 1.914032 | 2.272191  |
| 7             | 1             | 0           | -3.719115               | 3.553755 | 3.744858  |
| 8             | 6             | 0           | -0.127348               | 3.962405 | 1.097798  |
| 9             | 6             | 0           | 0.141753                | 4.346696 | 2.578806  |
| 10            | 1             | 0           | 0.700477                | 3.556322 | 3.095915  |
| 11            | 1             | 0           | 0.648890                | 5.305981 | 2.696435  |
| 12            | 6             | 0           | -0.435974               | 5.268605 | 0.310734  |
| 13            | 1             | 0           | -1.012258               | 5.051496 | -0.597384 |
| 14            | 1             | 0           | -0.945541               | 6.026659 | 0.907920  |
| 15            | 6             | 0           | 1.663802                | 4.687652 | -0.220406 |
| 16            | 6             | 0           | 1.102928                | 3.530477 | 0.331131  |
| 17            | 6             | 0           | 2.897855                | 4.679867 | -0.850819 |

|    |    |   |           |           |           |     |   |   |           |           |           |
|----|----|---|-----------|-----------|-----------|-----|---|---|-----------|-----------|-----------|
| 18 | 1  | 0 | 3.331767  | 5.589077  | -1.252390 | 87  | 1 | 0 | 3.421902  | -0.802383 | 2.746576  |
| 19 | 6  | 0 | 1.718501  | 2.303041  | 0.119119  | 88  | 1 | 0 | 5.548973  | 2.699291  | 1.279184  |
| 20 | 8  | 0 | -1.254529 | 1.547562  | -0.489734 | 89  | 1 | 0 | 6.474395  | 1.352832  | 1.964581  |
| 21 | 8  | 0 | 1.088638  | 1.154322  | 0.592450  | 90  | 6 | 0 | -4.068069 | 2.230022  | -1.917505 |
| 22 | 15 | 0 | -0.095114 | 0.414041  | -0.275909 | 91  | 6 | 0 | -3.230861 | 2.051360  | -3.198420 |
| 23 | 8  | 0 | 0.375473  | 0.014355  | -1.646027 | 92  | 6 | 0 | -5.366141 | 3.011019  | -2.205979 |
| 24 | 8  | 0 | -0.594449 | -0.674896 | 0.672741  | 93  | 1 | 0 | -3.479756 | 2.844532  | -1.231832 |
| 25 | 6  | 0 | -3.248722 | 1.636683  | 0.911169  | 94  | 1 | 0 | -3.777115 | 1.484783  | -3.962093 |
| 26 | 6  | 0 | 2.976841  | 2.234528  | -0.517929 | 95  | 1 | 0 | -2.295784 | 1.525120  | -2.986196 |
| 27 | 6  | 0 | -3.981206 | 0.606275  | 0.101627  | 96  | 1 | 0 | -5.941103 | 3.177767  | -1.288057 |
| 28 | 6  | 0 | -4.367800 | 0.895505  | -1.232921 | 97  | 1 | 0 | -6.011988 | 2.473767  | -2.910447 |
| 29 | 6  | 0 | -4.352360 | -0.633892 | 0.680243  | 98  | 6 | 0 | -3.987331 | -1.031779 | 2.112001  |
| 30 | 6  | 0 | -5.098948 | -0.055003 | -1.951563 | 99  | 6 | 0 | -5.215566 | -0.975836 | 3.044276  |
| 31 | 6  | 0 | -5.095560 | -1.541287 | -0.085142 | 100 | 6 | 0 | -3.340534 | -2.427470 | 2.193193  |
| 32 | 6  | 0 | -5.477026 | -1.281120 | -1.400566 | 101 | 1 | 0 | -3.247467 | -0.317206 | 2.482658  |
| 33 | 1  | 0 | -5.390885 | 0.177982  | -2.972635 | 102 | 1 | 0 | -5.983095 | -1.690532 | 2.722970  |
| 34 | 1  | 0 | -5.384643 | -2.490372 | 0.360497  | 103 | 1 | 0 | -5.678672 | 0.016345  | 3.060505  |
| 35 | 6  | 0 | 3.543571  | 3.444997  | -0.955681 | 104 | 1 | 0 | -2.502519 | -2.518494 | 1.499648  |
| 36 | 1  | 0 | 4.520475  | 3.404874  | -1.427196 | 105 | 1 | 0 | -4.059642 | -3.224119 | 1.966191  |
| 37 | 6  | 0 | 3.747225  | 0.960368  | -0.721680 | 106 | 1 | 0 | 2.065424  | 0.541388  | -4.988538 |
| 38 | 6  | 0 | 3.922408  | 0.430493  | -2.023009 | 107 | 1 | 0 | 3.866028  | 2.278898  | -4.978049 |
| 39 | 6  | 0 | 4.403626  | 0.351403  | 0.379470  | 108 | 1 | 0 | 5.461105  | 2.359162  | 3.018065  |
| 40 | 6  | 0 | 4.755993  | -0.684726 | -2.189102 | 109 | 1 | 0 | 4.083318  | 0.396196  | 3.871048  |
| 41 | 6  | 0 | 5.220284  | -0.761326 | 0.153986  | 110 | 1 | 0 | -2.983760 | 3.029336  | -3.629865 |
| 42 | 6  | 0 | 5.419959  | -1.292979 | -1.124378 | 111 | 1 | 0 | -5.135539 | 3.989162  | -2.645801 |
| 43 | 1  | 0 | 4.905755  | -1.083602 | -3.189804 | 112 | 1 | 0 | -2.963615 | -2.608225 | 3.206703  |
| 44 | 1  | 0 | 5.737621  | -1.210430 | 0.997177  | 113 | 1 | 0 | -4.929680 | -1.231731 | 4.071982  |
| 45 | 6  | 0 | 0.148109  | -3.264950 | -1.418275 | 114 | 6 | 0 | 6.363860  | -2.465246 | -1.364167 |
| 46 | 8  | 0 | -0.364748 | -3.042381 | 0.151061  | 115 | 6 | 0 | 5.942123  | -3.731892 | -0.597367 |
| 47 | 6  | 0 | 0.681405  | -3.702142 | 0.941386  | 116 | 1 | 0 | 6.620567  | -4.563769 | -0.821638 |
| 48 | 6  | 0 | 1.670499  | -3.149047 | -1.228089 | 117 | 1 | 0 | 5.963548  | -3.569703 | 0.486866  |
| 49 | 1  | 0 | 2.129172  | -3.971135 | -1.783181 | 118 | 1 | 0 | 4.926877  | -4.040317 | -0.870764 |
| 50 | 1  | 0 | 2.016157  | -2.208583 | -1.659884 | 119 | 6 | 0 | 7.822943  | -2.089207 | -1.040078 |
| 51 | 8  | 0 | -0.509532 | -2.383851 | -2.164953 | 120 | 1 | 0 | 7.945379  | -1.854623 | 0.024040  |
| 52 | 8  | 0 | -0.199103 | -4.548634 | -1.682954 | 121 | 1 | 0 | 8.499755  | -2.918383 | -1.279361 |
| 53 | 6  | 0 | -1.588633 | -4.784535 | -1.974176 | 122 | 1 | 0 | 8.141084  | -1.211756 | -1.613370 |
| 54 | 1  | 0 | -1.690253 | -5.869348 | -2.027913 | 123 | 6 | 0 | -6.278805 | -2.301925 | -2.197184 |
| 55 | 1  | 0 | -1.863792 | -4.330030 | -2.928489 | 124 | 6 | 0 | -7.666875 | -1.762867 | -2.591694 |
| 56 | 1  | 0 | -2.219792 | -4.383221 | -1.176477 | 125 | 1 | 0 | -7.582282 | -0.899137 | -3.261780 |
| 57 | 1  | 0 | -0.465094 | -1.923102 | 0.380805  | 126 | 1 | 0 | -8.248548 | -2.532870 | -3.113060 |
| 58 | 1  | 0 | -0.153082 | -1.445404 | -2.047545 | 127 | 1 | 0 | -8.233211 | -1.445552 | -1.709265 |
| 59 | 6  | 0 | 0.527555  | -3.494480 | 2.429166  | 128 | 6 | 0 | -5.507646 | -2.797008 | -3.435365 |
| 60 | 6  | 0 | 0.708289  | -2.245335 | 3.041824  | 129 | 1 | 0 | -4.531842 | -3.208642 | -3.154312 |
| 61 | 6  | 0 | 0.221706  | -4.601918 | 3.230895  | 130 | 1 | 0 | -6.073024 | -3.577867 | -3.958623 |
| 62 | 6  | 0 | 0.581875  | -2.116210 | 4.424636  | 131 | 1 | 0 | -5.329692 | -1.981397 | -4.146022 |
| 63 | 1  | 0 | 0.912738  | -1.366415 | 2.440744  | 132 | 1 | 0 | 6.317339  | -2.701018 | -2.436263 |
| 64 | 6  | 0 | 0.103006  | -4.474204 | 4.615202  | 133 | 1 | 0 | -6.438395 | -3.168876 | -1.540936 |
| 65 | 1  | 0 | 0.076924  | -5.574536 | 2.766076  | 134 | 8 | 0 | 0.861635  | 5.787128  | -0.068179 |
| 66 | 6  | 0 | 0.283019  | -3.227952 | 5.215518  | 135 | 8 | 0 | -1.177026 | 4.458497  | 3.170760  |
| 67 | 1  | 0 | 0.716237  | -1.141112 | 4.884609  |     |   |   |           |           |           |
| 68 | 1  | 0 | -0.131995 | -5.345506 | 5.220506  |     |   |   |           |           |           |
| 69 | 1  | 0 | 0.189353  | -3.122015 | 6.293034  |     |   |   |           |           |           |
| 70 | 1  | 0 | 0.540221  | -4.764141 | 0.723493  |     |   |   |           |           |           |
| 71 | 6  | 0 | 1.979878  | -3.218141 | 0.284385  |     |   |   |           |           |           |
| 72 | 1  | 0 | 2.811000  | -3.889577 | 0.516610  |     |   |   |           |           |           |
| 73 | 1  | 0 | 2.247761  | -2.226511 | 0.660008  |     |   |   |           |           |           |
| 74 | 6  | 0 | 3.284965  | 1.053690  | -3.267132 |     |   |   |           |           |           |
| 75 | 6  | 0 | 4.339248  | 1.798226  | -4.113286 |     |   |   |           |           |           |
| 76 | 6  | 0 | 2.538882  | 0.029237  | -4.142244 |     |   |   |           |           |           |
| 77 | 1  | 0 | 2.542501  | 1.783934  | -2.934523 |     |   |   |           |           |           |
| 78 | 1  | 0 | 5.101593  | 1.106004  | -4.491206 |     |   |   |           |           |           |
| 79 | 1  | 0 | 4.854882  | 2.573825  | -3.537321 |     |   |   |           |           |           |
| 80 | 1  | 0 | 1.753408  | -0.470064 | -3.571932 |     |   |   |           |           |           |
| 81 | 1  | 0 | 3.214043  | -0.728208 | -4.558333 |     |   |   |           |           |           |
| 82 | 6  | 0 | 4.331253  | 0.948258  | 1.786652  |     |   |   |           |           |           |
| 83 | 6  | 0 | 4.247545  | -0.101423 | 2.907959  |     |   |   |           |           |           |
| 84 | 6  | 0 | 5.524385  | 1.897618  | 2.024823  |     |   |   |           |           |           |
| 85 | 1  | 0 | 3.421267  | 1.550516  | 1.852370  |     |   |   |           |           |           |
| 86 | 1  | 0 | 5.171192  | -0.684104 | 3.002888  |     |   |   |           |           |           |

TS-2nd-(S)-reaction pathway: S-rel(S)-1da (Oxa-SPINOL)

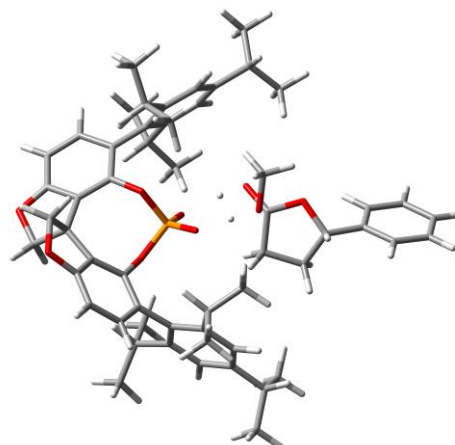

|                                              |                        |        |                         |           |           |           |           |
|----------------------------------------------|------------------------|--------|-------------------------|-----------|-----------|-----------|-----------|
| B3LYP/6-31G(d); E(RB3LYP) =                  | -3194.00864995 Hartree | 56     | 1                       | 0         | -7.927172 | 3.445557  | 1.600181  |
| Zero-point correction=                       | 1.147678 Hartree       | 57     | 1                       | 0         | -9.830648 | 2.548898  | 0.274856  |
| Thermal correction to Energy=                | 1.213227 Hartree       | 58     | 6                       | 0         | 0.203042  | -3.949703 | -0.176627 |
| Thermal correction to Enthalpy=              | 1.214171 Hartree       | 59     | 6                       | 0         | -0.081950 | -4.242883 | 1.181541  |
| Thermal correction to Gibbs Free Energy=     | 1.043708 Hartree       | 60     | 6                       | 0         | -0.831345 | -4.049354 | -1.141895 |
| Sum of electronic and zero-point Energies=   | -3192.860972 Hartree   | 61     | 6                       | 0         | -1.377614 | -4.629851 | 1.539306  |
| Sum of electronic and thermal Energies=      | -3192.795423 Hartree   | 62     | 6                       | 0         | -2.109322 | -4.444716 | -0.724894 |
| Sum of electronic and thermal Enthalpies=    | -3192.794479 Hartree   | 63     | 6                       | 0         | -2.408911 | -4.744471 | 0.604774  |
| Sum of electronic and thermal Free Energies= | -3192.964942 Hartree   | 64     | 1                       | 0         | -1.579091 | -4.864818 | 2.581419  |
| The number of Imaginary frequencies = 1      |                        | 65     | 1                       | 0         | -2.899493 | -4.534583 | -1.467316 |
| -----                                        |                        |        |                         |           |           |           |           |
| Center                                       | Atomic                 | Atomic | Coordinates (Angstroms) |           |           |           |           |
| Number                                       | Number                 | Type   | X                       | Y         | Z         |           |           |
| -----                                        |                        |        |                         |           |           |           |           |
| 1                                            | 6                      | 0      | -2.662425               | 1.085327  | -0.083240 | 70        | 6         |
| 2                                            | 8                      | 0      | -3.857391               | 1.644110  | -0.383946 | 71        | 6         |
| 3                                            | 8                      | 0      | -2.061489               | 0.640011  | -1.627066 | 72        | 1         |
| 4                                            | 6                      | 0      | -4.859832               | 0.591121  | -0.486675 | 73        | 1         |
| 5                                            | 6                      | 0      | -4.403146               | -0.425887 | 0.578753  | 74        | 6         |
| 6                                            | 6                      | 0      | -2.868288               | -0.292013 | 0.565845  | 75        | 6         |
| 7                                            | 1                      | 0      | -4.775581               | 0.150674  | -1.487648 | 76        | 6         |
| 8                                            | 1                      | 0      | -4.814129               | -0.138172 | 1.551506  | 77        | 1         |
| 9                                            | 1                      | 0      | -4.749974               | -1.436342 | 0.348905  | 78        | 1         |
| 10                                           | 1                      | 0      | -2.424138               | -0.289477 | 1.563157  | 79        | 1         |
| 11                                           | 1                      | 0      | -2.383669               | -1.081495 | -0.010378 | 80        | 1         |
| 12                                           | 8                      | 0      | -1.820466               | 1.973081  | 0.405078  | 81        | 1         |
| 13                                           | 6                      | 0      | -1.846432               | 1.767072  | -2.503989 | 82        | 6         |
| 14                                           | 1                      | 0      | -1.173443               | 2.493645  | -2.041418 | 83        | 6         |
| 15                                           | 1                      | 0      | -1.412279               | 1.378050  | -3.427153 | 84        | 6         |
| 16                                           | 1                      | 0      | -2.816461               | 2.223535  | -2.703346 | 85        | 1         |
| 17                                           | 1                      | 0      | -0.969714               | 1.508814  | 0.716769  | 86        | 1         |
| 18                                           | 1                      | 0      | -1.112922               | 0.131784  | -1.473967 | 87        | 1         |
| 19                                           | 6                      | 0      | 3.583175                | -2.195433 | -0.539900 | 88        | 1         |
| 20                                           | 6                      | 0      | 2.258680                | -2.425774 | -0.191917 | 89        | 1         |
| 21                                           | 6                      | 0      | 2.336255                | -4.507734 | -1.392668 | 90        | 6         |
| 22                                           | 6                      | 0      | 3.627767                | -4.243324 | -1.859413 | 91        | 6         |
| 23                                           | 6                      | 0      | 4.218562                | -3.063597 | -1.434240 | 92        | 6         |
| 24                                           | 1                      | 0      | 1.856997                | -5.436830 | -1.684106 | 93        | 1         |
| 25                                           | 1                      | 0      | 4.143943                | -4.923047 | -2.528669 | 94        | 1         |
| 26                                           | 6                      | 0      | 4.613438                | -1.165214 | -0.129468 | 95        | 1         |
| 27                                           | 6                      | 0      | 5.505288                | -1.223060 | -1.400220 | 96        | 1         |
| 28                                           | 1                      | 0      | 5.094223                | -0.593244 | -2.199121 | 97        | 1         |
| 29                                           | 1                      | 0      | 6.548725                | -0.963262 | -1.213525 | 98        | 6         |
| 30                                           | 6                      | 0      | 5.480752                | -1.606071 | 1.084619  | 99        | 6         |
| 31                                           | 1                      | 0      | 4.849581                | -1.959150 | 1.909863  | 100       | 6         |
| 32                                           | 1                      | 0      | 6.230620                | -2.358665 | 0.834808  | 101       | 1         |
| 33                                           | 6                      | 0      | 5.319694                | 0.629554  | 1.196484  | 102       | 1         |
| 34                                           | 6                      | 0      | 4.291317                | 0.236862  | 0.334281  | 103       | 1         |
| 35                                           | 6                      | 0      | 5.423309                | 1.927397  | 1.673264  | 104       | 1         |
| 36                                           | 1                      | 0      | 6.242220                | 2.227291  | 2.318110  | 105       | 1         |
| 37                                           | 6                      | 0      | 3.252345                | 1.115914  | 0.065150  | 106       | 1         |
| 38                                           | 6                      | 0      | 4.410906                | 2.819769  | 1.305078  | 107       | 1         |
| 39                                           | 1                      | 0      | 4.465612                | 3.845260  | 1.657620  | 108       | 1         |
| 40                                           | 8                      | 0      | 1.596313                | -1.489041 | 0.593615  | 109       | 1         |
| 41                                           | 8                      | 0      | 2.195978                | 0.670454  | -0.719127 | 110       | 1         |
| 42                                           | 15                     | 0      | 0.927282                | -0.150068 | -0.074047 | 111       | 1         |
| 43                                           | 8                      | 0      | 0.276923                | 0.588762  | 1.065790  | 112       | 1         |
| 44                                           | 8                      | 0      | 0.086490                | -0.513782 | -1.290249 | 113       | 1         |
| 45                                           | 6                      | 0      | 1.605602                | -3.611697 | -0.593277 | 114       | 6         |
| 46                                           | 6                      | 0      | 3.292283                | 2.444713  | 0.541070  | 115       | 6         |
| 47                                           | 6                      | 0      | -6.234872               | 1.176621  | -0.293783 | 116       | 1         |
| 48                                           | 6                      | 0      | -7.307739               | 0.686194  | -1.045490 | 117       | 1         |
| 49                                           | 6                      | 0      | -6.468876               | 2.173013  | 0.662717  | 118       | 1         |
| 50                                           | 6                      | 0      | -8.599852               | 1.171573  | -0.837637 | 119       | 6         |
| 51                                           | 1                      | 0      | -7.132115               | -0.078713 | -1.798968 | 120       | 1         |
| 52                                           | 6                      | 0      | -7.757564               | 2.666098  | 0.862243  | 121       | 1         |
| 53                                           | 1                      | 0      | -5.635714               | 2.572599  | 1.233007  | 122       | 1         |
| 54                                           | 6                      | 0      | -8.826968               | 2.163816  | 0.116574  | 123       | 6         |
| 55                                           | 1                      | 0      | -9.424713               | 0.781197  | -1.427491 | 124       | 6         |

|     |   |   |           |           |           |
|-----|---|---|-----------|-----------|-----------|
| 125 | 1 | 0 | -2.649607 | 4.717514  | -0.280288 |
| 126 | 1 | 0 | -2.404478 | 5.741468  | 1.136841  |
| 127 | 1 | 0 | -3.222796 | 6.402327  | -0.284033 |
| 128 | 6 | 0 | -0.725920 | 7.631562  | -0.032604 |
| 129 | 1 | 0 | -1.526341 | 8.336581  | -0.288817 |
| 130 | 1 | 0 | -0.603288 | 7.645093  | 1.057118  |
| 131 | 1 | 0 | 0.206589  | 7.996409  | -0.477246 |
| 132 | 1 | 0 | -1.170623 | 6.267246  | -1.624433 |
| 133 | 1 | 0 | -4.449267 | -5.086390 | 0.123870  |
| 134 | 8 | 0 | 6.170487  | -0.401652 | 1.500841  |
| 135 | 8 | 0 | 5.453472  | -2.610111 | -1.818804 |

---

Optimized structure of Oxa-SPISOL-derived CPA (S)-1ea

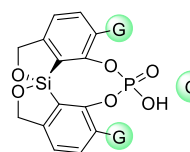

(S)-1ea (Oxa-SPISOL)

distance: 5.26 Å (+10.0%)  
 angle: 98.3° (-1.3%)  
 dihedral: 50.6° (-17.3%)

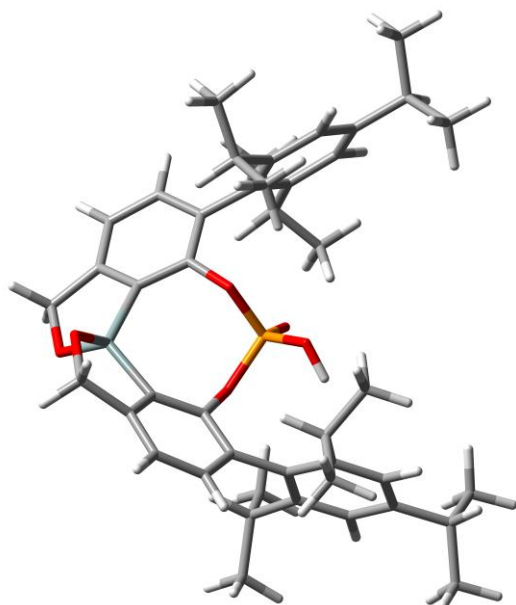

B3LYP/6-31G(d); E(RB3LYP) = -2792.22153413 Hartree

Zero-point correction= 0.907065 Hartree  
 Thermal correction to Energy= 0.960420 Hartree  
 Thermal correction to Enthalpy= 0.961364 Hartree  
 Thermal correction to Gibbs Free Energy= 0.819374 Hartree  
 Sum of electronic and zero-point Energies= -2791.314469 Hartree  
 Sum of electronic and thermal Energies= -2791.261115 Hartree  
 Sum of electronic and thermal Enthalpies= -2791.260170 Hartree  
 Sum of electronic and thermal Free Energies= -2791.402160 Hartree

The number of Imaginary frequencies = 0

| Center Number | Atomic Number | Atomic Type | Coordinates (Angstroms) |           |           |
|---------------|---------------|-------------|-------------------------|-----------|-----------|
|               |               |             | X                       | Y         | Z         |
| 1             | 1             | 0           | -1.489627               | -1.380882 | 0.661246  |
| 2             | 6             | 0           | 1.462112                | 2.870128  | -0.488274 |
| 3             | 6             | 0           | 1.907226                | 1.578233  | -0.219132 |
| 4             | 6             | 0           | 3.932058                | 2.024353  | -1.396316 |
| 5             | 6             | 0           | 3.445701                | 3.263169  | -1.814761 |
| 6             | 6             | 0           | 2.190555                | 3.678763  | -1.371026 |
| 7             | 1             | 0           | 4.922038                | 1.709293  | -1.711605 |
| 8             | 1             | 0           | 4.040545                | 3.881194  | -2.483185 |
| 9             | 6             | 0           | 1.422966                | 4.911144  | -1.829010 |
| 10            | 1             | 0           | 1.904127                | 5.844560  | -1.505910 |
| 11            | 1             | 0           | 1.358325                | 4.930872  | -2.923620 |
| 12            | 6             | 0           | -1.415434               | 4.800102  | 1.983697  |
| 13            | 1             | 0           | -1.899365               | 5.759514  | 1.752423  |
| 14            | 1             | 0           | -1.295697               | 4.743161  | 3.072535  |
| 15            | 6             | 0           | -2.225036               | 3.613573  | 1.482875  |
| 16            | 6             | 0           | -1.581771               | 2.895092  | 0.466265  |
| 17            | 6             | 0           | -3.431434               | 3.149878  | 2.007134  |
| 18            | 1             | 0           | -3.965006               | 3.709210  | 2.771917  |
| 19            | 6             | 0           | -2.046544               | 1.628049  | 0.127837  |
| 20            | 6             | 0           | -3.935762               | 1.927828  | 1.561489  |
| 21            | 1             | 0           | -4.877856               | 1.565974  | 1.961798  |
| 22            | 8             | 0           | 1.025933                | 0.728764  | 0.475874  |
| 23            | 8             | 0           | -1.292888               | 0.882401  | -0.780631 |

|    |    |   |           |           |           |
|----|----|---|-----------|-----------|-----------|
| 24 | 15 | 0 | -0.067232 | -0.117928 | -0.375831 |
| 25 | 8  | 0 | -0.615560 | -0.988037 | 0.854790  |
| 26 | 8  | 0 | 0.404536  | -0.797213 | -1.593877 |
| 27 | 6  | 0 | 3.167646  | 1.121406  | -0.628272 |
| 28 | 6  | 0 | -3.237060 | 1.103335  | 0.657697  |
| 29 | 6  | 0 | -3.723276 | -0.277520 | 0.323983  |
| 30 | 6  | 0 | -3.789557 | -1.280250 | 1.332997  |
| 31 | 6  | 0 | -4.123845 | -0.592992 | -1.001824 |
| 32 | 6  | 0 | -4.221539 | -2.566083 | 0.975417  |
| 33 | 6  | 0 | -4.551910 | -1.892069 | -1.290697 |
| 34 | 6  | 0 | -4.602097 | -2.899708 | -0.324407 |
| 35 | 1  | 0 | -4.270781 | -3.334450 | 1.742914  |
| 36 | 1  | 0 | -4.857902 | -2.121614 | -2.307795 |
| 37 | 6  | 0 | 3.711700  | -0.232100 | -0.278225 |
| 38 | 6  | 0 | 4.026062  | -0.536567 | 1.071196  |
| 39 | 6  | 0 | 3.964845  | -1.189972 | -1.291593 |
| 40 | 6  | 0 | 4.576842  | -1.785182 | 1.373743  |
| 41 | 6  | 0 | 4.525339  | -2.420123 | -0.926795 |
| 42 | 6  | 0 | 4.836383  | -2.744958 | 0.392859  |
| 43 | 1  | 0 | 4.817586  | -2.009581 | 2.409932  |
| 44 | 1  | 0 | 4.721226  | -3.156983 | -1.702037 |
| 45 | 6  | 0 | 3.669074  | -0.944175 | -2.772662 |
| 46 | 6  | 0 | 4.973393  | -0.758977 | -3.575850 |
| 47 | 6  | 0 | 2.809741  | -2.059184 | -3.399199 |
| 48 | 1  | 0 | 3.088895  | -0.021297 | -2.855365 |
| 49 | 1  | 0 | 5.584551  | -1.669298 | -3.550405 |
| 50 | 1  | 0 | 5.587940  | 0.058390  | -3.181621 |
| 51 | 1  | 0 | 1.871255  | -2.173083 | -2.853217 |
| 52 | 1  | 0 | 3.333946  | -3.022313 | -3.413335 |
| 53 | 6  | 0 | 3.834555  | 0.458649  | 2.216774  |
| 54 | 6  | 0 | 2.877595  | -0.079657 | 3.297649  |
| 55 | 6  | 0 | 5.187563  | 0.872667  | 2.829591  |
| 56 | 1  | 0 | 3.382832  | 1.368622  | 1.813743  |
| 57 | 1  | 0 | 3.286215  | -0.969080 | 3.792029  |
| 58 | 1  | 0 | 1.908446  | -0.346109 | 2.865511  |
| 59 | 1  | 0 | 5.853953  | 1.296542  | 2.069914  |
| 60 | 1  | 0 | 5.702377  | 0.018267  | 3.284527  |
| 61 | 6  | 0 | -3.461906 | -1.017305 | 2.808357  |
| 62 | 6  | 0 | -4.758003 | -0.955509 | 3.644619  |
| 63 | 6  | 0 | -2.494951 | -2.048736 | 3.423821  |
| 64 | 1  | 0 | -2.971933 | -0.042773 | 2.881430  |
| 65 | 1  | 0 | -5.272776 | -1.923619 | 3.641248  |
| 66 | 1  | 0 | -5.460809 | -0.210008 | 3.257561  |
| 67 | 1  | 0 | -1.542887 | -2.087336 | 2.886982  |
| 68 | 1  | 0 | -2.921919 | -3.057890 | 3.439367  |
| 69 | 6  | 0 | -4.165248 | 0.445029  | -2.123725 |
| 70 | 6  | 0 | -3.333273 | 0.022498  | -3.349596 |
| 71 | 6  | 0 | -5.622371 | 0.757421  | -2.522263 |
| 72 | 1  | 0 | -3.735089 | 1.376136  | -1.747594 |
| 73 | 1  | 0 | -3.748145 | -0.869672 | -3.833775 |
| 74 | 1  | 0 | -2.296323 | -0.189208 | -3.073350 |
| 75 | 1  | 0 | -6.205309 | 1.106019  | -1.662225 |
| 76 | 1  | 0 | -6.125567 | -0.127222 | -2.930265 |
| 77 | 1  | 0 | 4.748850  | -0.537201 | -4.626326 |
| 78 | 1  | 0 | 2.572556  | -1.802417 | -4.439056 |
| 79 | 1  | 0 | 5.039104  | 1.627522  | 3.611379  |
| 80 | 1  | 0 | 2.711789  | 0.680608  | 4.070813  |
| 81 | 1  | 0 | -2.277243 | -1.773304 | 4.462254  |
| 82 | 1  | 0 | -4.530639 | -0.699968 | 4.686396  |
| 83 | 1  | 0 | -3.330433 | 0.826837  | -4.094699 |
| 84 | 1  | 0 | -5.647700 | 1.539853  | -3.289960 |
| 85 | 6  | 0 | -5.059206 | -4.311615 | -0.665449 |
| 86 | 6  | 0 | -4.118589 | -4.986418 | -1.681966 |
| 87 | 1  | 0 | -3.085622 | -5.002838 | -1.317996 |
| 88 | 1  | 0 | -4.431639 | -6.020530 | -1.868364 |
| 89 | 1  | 0 | -4.124849 | -4.458066 | -2.642538 |
| 90 | 6  | 0 | -6.518503 | -4.338867 | -1.158182 |
| 91 | 1  | 0 | -7.195014 | -3.891185 | -0.421943 |
| 92 | 1  | 0 | -6.633055 | -3.785285 | -2.097638 |

|     |   |   |           |           |           |     |    |   |           |           |           |
|-----|---|---|-----------|-----------|-----------|-----|----|---|-----------|-----------|-----------|
| 93  | 1 | 0 | -6.844118 | -5.370059 | -1.338928 | 102 | 1  | 0 | 3.519203  | -5.048514 | 1.202305  |
| 94  | 6 | 0 | 5.437157  | -4.100373 | 0.741360  | 103 | 14 | 0 | -0.045824 | 3.819870  | 0.001377  |
| 95  | 6 | 0 | 6.842088  | -3.966129 | 1.358586  | 104 | 8  | 0 | 0.091216  | 4.868589  | -1.298576 |
| 96  | 1 | 0 | 6.807676  | -3.431322 | 2.315258  | 105 | 8  | 0 | -0.118623 | 4.773511  | 1.381449  |
| 97  | 1 | 0 | 7.278822  | -4.954599 | 1.545949  | 106 | 1  | 0 | -5.015073 | -4.897069 | 0.263175  |
| 98  | 1 | 0 | 7.516002  | -3.415452 | 0.693148  | 107 | 1  | 0 | 5.544212  | -4.656409 | -0.200205 |
| 99  | 6 | 0 | 4.507668  | -4.919959 | 1.656426  |     |    |   |           |           |           |
| 100 | 1 | 0 | 4.929789  | -5.914260 | 1.846751  |     |    |   |           |           |           |
| 101 | 1 | 0 | 4.367503  | -4.426404 | 2.625525  |     |    |   |           |           |           |

DFT calculation for all conformations of real system using Oxa-SPISOL-derived CPA (S)-Iea

| TS            | Orientation I | Orientation II | G <sup>‡</sup> (a.u.) | ΔΔG <sup>‡</sup> (kcal/mmol) |
|---------------|---------------|----------------|-----------------------|------------------------------|
| <i>R-anti</i> | up            | up             |                       |                              |
|               | up            | down           |                       |                              |
|               | down          | up             |                       |                              |
|               | down          | down           | -3444.465681          | -2.08                        |

|               |      |      |              |      |
|---------------|------|------|--------------|------|
| <i>S-anti</i> | up   | up   | -3444.460132 | 1.40 |
|               | up   | down | -3444.458679 | 2.31 |
|               | down | up   | -3444.456643 | 3.59 |
|               | down | down | -3444.455752 | 4.15 |

|              |      |      |              |      |
|--------------|------|------|--------------|------|
| <i>S-syn</i> | up   | up   | -3444.459471 | 1.81 |
|              | up   | down | -3444.45906  | 2.07 |
|              | down | down | -3444.459477 | 1.81 |
|              | down | up   | -3444.459111 | 2.04 |

| TS          | Orientation I | Orientation II | G <sup>‡</sup> (a.u.) | ΔΔG <sup>‡</sup> (kcal/mmol) |
|-------------|---------------|----------------|-----------------------|------------------------------|
| <i>R-re</i> | up            | up             | -3444.462362          | 0.00                         |
|             | up            | down           | -3444.461982          | 0.24                         |
|             | down          | up             | -3444.461695          | 0.42                         |
|             | down          | down           | -3444.461386          | 0.61                         |

|             |      |      |              |      |
|-------------|------|------|--------------|------|
| <i>S-si</i> | up   | up   | -3444.460073 | 1.44 |
|             | up   | down | -3444.460224 | 1.34 |
|             | down | up   | -3444.459617 | 1.72 |
|             | down | down | -3444.45952  | 1.78 |

|             |      |      |              |       |
|-------------|------|------|--------------|-------|
| <i>S-re</i> | up   | up   | -3444.463046 | -0.43 |
|             | up   | down |              |       |
|             | down | up   |              |       |
|             | down | down |              |       |

\* Assignments of "up" and "down" are shown in ESI page S55.

DFT calculation of real system using Oxa-SPISOL-derived CPA (S)-Iea

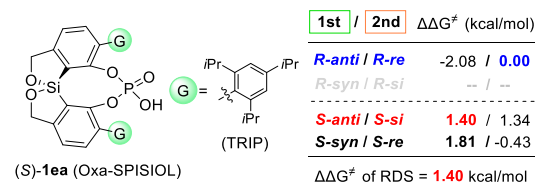

TS-1st-(R)-reaction pathway: *R-anti*/(*S*)-Iea (Oxa-SPISOL)

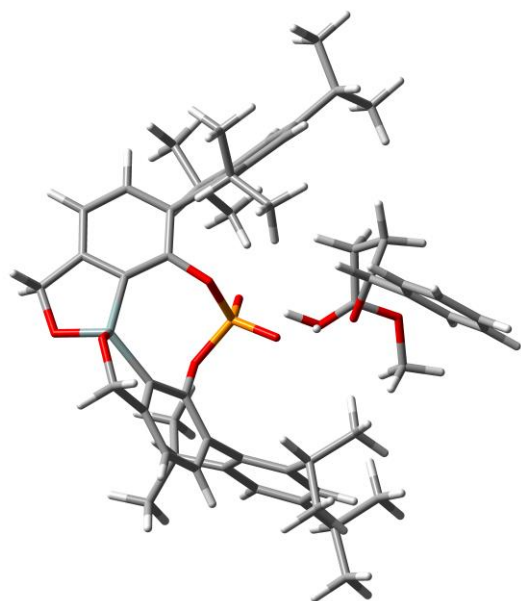

B3LYP/6-31G(d); E(RB3LYP) = -3445.50188311 Hartree  
 Zero-point correction= 1.140584 Hartree  
 Thermal correction to Energy= 1.207165 Hartree  
 Thermal correction to Enthalpy= 1.208109 Hartree  
 Thermal correction to Gibbs Free Energy= 1.036203 Hartree

Sum of electronic and zero-point Energies= -3444.361299 Hartree  
 Sum of electronic and thermal Energies= -3444.294718 Hartree  
 Sum of electronic and thermal Enthalpies= -3444.293774 Hartree  
 Sum of electronic and thermal Free Energies= -3444.465681 Hartree  
 The number of Imaginary frequencies = 1

| Center Number | Atomic Number | Atomic Type | Coordinates (Angstroms) |           |           |
|---------------|---------------|-------------|-------------------------|-----------|-----------|
|               |               |             | X                       | Y         | Z         |
| 1             | 6             | 0           | 0.131522                | -3.009178 | -1.428467 |
| 2             | 8             | 0           | -0.236441               | -2.704319 | 0.195390  |
| 3             | 6             | 0           | 0.886575                | -3.129230 | 1.031012  |
| 4             | 6             | 0           | 1.893596                | -3.773388 | 0.053763  |
| 5             | 6             | 0           | 1.642029                | -3.075460 | -1.282673 |
| 6             | 1             | 0           | 1.319327                | -2.215330 | 1.449650  |
| 7             | 1             | 0           | 1.706111                | -4.847300 | -0.034012 |
| 8             | 1             | 0           | 2.916441                | -3.632535 | 0.412104  |
| 9             | 1             | 0           | 2.062239                | -3.615451 | -2.135502 |
| 10            | 1             | 0           | 2.041418                | -2.057485 | -1.283831 |
| 11            | 8             | 0           | -0.451852               | -2.052183 | -2.137311 |
| 12            | 8             | 0           | -0.388930               | -4.234762 | -1.655274 |
| 13            | 6             | 0           | -1.801913               | -4.292504 | -1.923484 |
| 14            | 1             | 0           | -2.044686               | -5.355467 | -1.953703 |
| 15            | 1             | 0           | -2.028414               | -3.823743 | -2.883055 |
| 16            | 1             | 0           | -2.364430               | -3.796296 | -1.128381 |
| 17            | 1             | 0           | -0.439948               | -1.598337 | 0.412235  |
| 18            | 1             | 0           | -0.037921               | -1.141245 | -1.973412 |
| 19            | 6             | 0           | 1.490943                | 3.746813  | 0.425656  |
| 20            | 6             | 0           | 1.964706                | 2.445810  | 0.263414  |
| 21            | 6             | 0           | 3.917266                | 3.318288  | -0.811086 |
| 22            | 6             | 0           | 3.389005                | 4.608063  | -0.799505 |
| 23            | 6             | 0           | 2.152653                | 4.816420  | -0.190829 |
| 24            | 1             | 0           | 4.897043                | 3.151744  | -1.248464 |
| 25            | 1             | 0           | 3.936499                | 5.424758  | -1.264121 |
| 26            | 6             | 0           | 1.341757                | 6.103599  | -0.198350 |
| 27            | 1             | 0           | 1.824311                | 6.899742  | 0.386100  |
| 28            | 1             | 0           | 1.226297                | 6.470776  | -1.225819 |
| 29            | 6             | 0           | -1.460208               | 4.717281  | 3.360228  |
| 30            | 1             | 0           | -1.922154               | 5.710553  | 3.447977  |
| 31            | 1             | 0           | -1.392481               | 4.292140  | 4.369345  |
| 32            | 6             | 0           | -2.258874               | 3.791153  | 2.453387  |

|     |    |   |           |           |           |     |    |   |           |           |           |
|-----|----|---|-----------|-----------|-----------|-----|----|---|-----------|-----------|-----------|
| 33  | 6  | 0 | -1.547670 | 3.382280  | 1.318573  | 102 | 1  | 0 | -1.953117 | 1.620567  | -3.041044 |
| 34  | 6  | 0 | -3.534089 | 3.279923  | 2.688276  | 103 | 1  | 0 | -5.744798 | 3.335951  | -1.780360 |
| 35  | 1  | 0 | -4.123963 | 3.597806  | 3.544842  | 104 | 1  | 0 | -5.645311 | 2.607456  | -3.390882 |
| 36  | 6  | 0 | -2.016609 | 2.324238  | 0.543374  | 105 | 1  | 0 | 4.566458  | 1.979681  | -4.724629 |
| 37  | 6  | 0 | -4.052025 | 2.343242  | 1.794374  | 106 | 1  | 0 | 2.536006  | 0.514727  | -4.818563 |
| 38  | 1  | 0 | -5.063643 | 1.978379  | 1.940884  | 107 | 1  | 0 | 5.317868  | 1.527129  | 3.779544  |
| 39  | 8  | 0 | 1.161631  | 1.408371  | 0.741347  | 108 | 1  | 0 | 3.126639  | 0.284449  | 4.023882  |
| 40  | 8  | 0 | -1.166106 | 1.828093  | -0.448405 | 109 | 1  | 0 | -3.151493 | -2.455885 | 3.022950  |
| 41  | 15 | 0 | -0.014548 | 0.698447  | -0.163307 | 110 | 1  | 0 | -5.193833 | -1.140699 | 3.731265  |
| 42  | 8  | 0 | -0.575162 | -0.374915 | 0.770674  | 111 | 1  | 0 | -2.562032 | 3.106539  | -3.794586 |
| 43  | 8  | 0 | 0.512982  | 0.280389  | -1.509383 | 112 | 1  | 0 | -4.783297 | 4.115828  | -3.051500 |
| 44  | 6  | 0 | 3.215025  | 2.194800  | -0.326600 | 113 | 6  | 0 | -6.162694 | -2.077812 | -2.605338 |
| 45  | 6  | 0 | -3.306534 | 1.799295  | 0.726528  | 114 | 6  | 0 | -7.595625 | -2.253189 | -2.066746 |
| 46  | 6  | 0 | 0.417191  | -4.026740 | 2.151969  | 115 | 1  | 0 | -8.108964 | -1.288672 | -1.989043 |
| 47  | 6  | 0 | 0.740351  | -3.718271 | 3.476859  | 116 | 1  | 0 | -8.182739 | -2.901132 | -2.728943 |
| 48  | 6  | 0 | -0.323341 | -5.186396 | 1.883246  | 117 | 1  | 0 | -7.592271 | -2.710163 | -1.069957 |
| 49  | 6  | 0 | 0.342214  | -4.558535 | 4.519275  | 118 | 6  | 0 | -5.465850 | -3.441310 | -2.765429 |
| 50  | 1  | 0 | 1.303521  | -2.814045 | 3.695623  | 119 | 1  | 0 | -4.466312 | -3.322680 | -3.197804 |
| 51  | 6  | 0 | -0.728451 | -6.020746 | 2.922834  | 120 | 1  | 0 | -5.358653 | -3.949759 | -1.799529 |
| 52  | 1  | 0 | -0.585116 | -5.425216 | 0.856193  | 121 | 1  | 0 | -6.046328 | -4.098847 | -3.423913 |
| 53  | 6  | 0 | -0.393734 | -5.710653 | 4.244298  | 122 | 6  | 0 | 6.180636  | -2.834915 | -0.736955 |
| 54  | 1  | 0 | 0.601286  | -4.306957 | 5.544216  | 123 | 6  | 0 | 5.626405  | -3.910370 | -1.687127 |
| 55  | 1  | 0 | -1.306261 | -6.914862 | 2.703706  | 124 | 1  | 0 | 5.589404  | -3.551174 | -2.723506 |
| 56  | 1  | 0 | -0.709149 | -6.363353 | 5.053924  | 125 | 1  | 0 | 6.266128  | -4.800518 | -1.669863 |
| 57  | 6  | 0 | -3.934453 | 0.754983  | -0.149097 | 126 | 1  | 0 | 4.614419  | -4.217162 | -1.401644 |
| 58  | 6  | 0 | -4.361773 | -0.482869 | 0.402332  | 127 | 6  | 0 | 7.623446  | -2.456005 | -1.129971 |
| 59  | 6  | 0 | -4.205961 | 1.041587  | -1.510161 | 128 | 1  | 0 | 8.271202  | -3.341123 | -1.135178 |
| 60  | 6  | 0 | -5.063428 | -1.380399 | -0.409546 | 129 | 1  | 0 | 7.651532  | -2.011356 | -2.132022 |
| 61  | 6  | 0 | -4.903581 | 0.098609  | -2.274744 | 130 | 1  | 0 | 8.045287  | -1.726856 | -0.429924 |
| 62  | 6  | 0 | -5.355469 | -1.110379 | -1.748936 | 131 | 14 | 0 | -0.029504 | 4.421585  | 1.225150  |
| 63  | 1  | 0 | -5.401079 | -2.317838 | 0.025527  | 132 | 8  | 0 | 0.042616  | 5.849336  | 0.342946  |
| 64  | 1  | 0 | -5.120521 | 0.326116  | -3.316101 | 133 | 8  | 0 | -0.132714 | 4.865882  | 2.841227  |
| 65  | 6  | 0 | 3.853548  | 0.841327  | -0.436172 | 134 | 1  | 0 | 6.221395  | -3.274696 | 0.269472  |
| 66  | 6  | 0 | 4.298998  | 0.174613  | 0.731615  | 135 | 1  | 0 | -6.241052 | -1.632006 | -3.606399 |
| 67  | 6  | 0 | 4.124120  | 0.277300  | -1.710674 |     |    |   |           |           |           |
| 68  | 6  | 0 | 5.001323  | -1.030289 | 0.598229  |     |    |   |           |           |           |
| 69  | 6  | 0 | 4.848489  | -0.918526 | -1.781930 |     |    |   |           |           |           |
| 70  | 6  | 0 | 5.306375  | -1.589061 | -0.644308 |     |    |   |           |           |           |
| 71  | 1  | 0 | 5.358004  | -1.532100 | 1.495656  |     |    |   |           |           |           |
| 72  | 1  | 0 | 5.072528  | -1.328999 | -2.762911 |     |    |   |           |           |           |
| 73  | 6  | 0 | 3.686878  | 0.933268  | -3.023513 |     |    |   |           |           |           |
| 74  | 6  | 0 | 4.899602  | 1.464496  | -3.815669 |     |    |   |           |           |           |
| 75  | 6  | 0 | 2.848401  | -0.009640 | -3.907386 |     |    |   |           |           |           |
| 76  | 1  | 0 | 3.045902  | 1.784323  | -2.780300 |     |    |   |           |           |           |
| 77  | 1  | 0 | 5.563394  | 0.646646  | -4.121289 |     |    |   |           |           |           |
| 78  | 1  | 0 | 5.497599  | 2.169648  | -3.228055 |     |    |   |           |           |           |
| 79  | 1  | 0 | 1.948569  | -0.333433 | -3.380863 |     |    |   |           |           |           |
| 80  | 1  | 0 | 3.416334  | -0.894823 | -4.218579 |     |    |   |           |           |           |
| 81  | 6  | 0 | 4.113402  | 0.748575  | 2.137351  |     |    |   |           |           |           |
| 82  | 6  | 0 | 3.246355  | -0.160520 | 3.028666  |     |    |   |           |           |           |
| 83  | 6  | 0 | 5.470731  | 1.047768  | 2.805220  |     |    |   |           |           |           |
| 84  | 1  | 0 | 3.589336  | 1.703245  | 2.052117  |     |    |   |           |           |           |
| 85  | 1  | 0 | 3.702680  | -1.149632 | 3.160867  |     |    |   |           |           |           |
| 86  | 1  | 0 | 2.248946  | -0.288160 | 2.596255  |     |    |   |           |           |           |
| 87  | 1  | 0 | 6.076050  | 1.720267  | 2.187288  |     |    |   |           |           |           |
| 88  | 1  | 0 | 6.052728  | 0.133768  | 2.972257  |     |    |   |           |           |           |
| 89  | 6  | 0 | -4.103394 | -0.884537 | 1.857227  |     |    |   |           |           |           |
| 90  | 6  | 0 | -5.406306 | -0.894763 | 2.683653  |     |    |   |           |           |           |
| 91  | 6  | 0 | -3.402917 | -2.251215 | 1.975463  |     |    |   |           |           |           |
| 92  | 1  | 0 | -3.428916 | -0.146314 | 2.298818  |     |    |   |           |           |           |
| 93  | 1  | 0 | -6.109195 | -1.644913 | 2.301412  |     |    |   |           |           |           |
| 94  | 1  | 0 | -5.918230 | 0.073219  | 2.661752  |     |    |   |           |           |           |
| 95  | 1  | 0 | -2.477551 | -2.276017 | 1.396991  |     |    |   |           |           |           |
| 96  | 1  | 0 | -4.045230 | -3.070429 | 1.629778  |     |    |   |           |           |           |
| 97  | 6  | 0 | -3.824332 | 2.359915  | -2.184670 |     |    |   |           |           |           |
| 98  | 6  | 0 | -2.858479 | 2.141676  | -3.365271 |     |    |   |           |           |           |
| 99  | 6  | 0 | -5.074290 | 3.147577  | -2.626521 |     |    |   |           |           |           |
| 100 | 1  | 0 | -3.304047 | 2.985403  | -1.456309 |     |    |   |           |           |           |
| 101 | 1  | 0 | -3.325901 | 1.554092  | -4.164789 |     |    |   |           |           |           |

TS-2nd-(R)-reaction pathway: R-re/(S)-Iea (Oxa-SPISIOI)

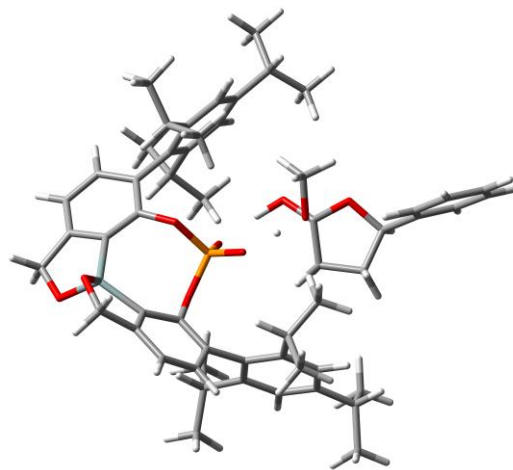

B3LYP/6-31G(d); E(RB3LYP) = -3445.50043667 Hartree

Zero-point correction= 1.141675 Hartree  
Thermal correction to Energy= 1.208159 Hartree  
Thermal correction to Enthalpy= 1.209103 Hartree  
Thermal correction to Gibbs Free Energy= 1.038075 Hartree  
Sum of electronic and zero-point Energies= -3444.358761 Hartree  
Sum of electronic and thermal Energies= -3444.292278 Hartree  
Sum of electronic and thermal Enthalpies= -3444.291334 Hartree  
Sum of electronic and thermal Free Energies= -3444.462362 Hartree  
The number of Imaginary frequencies = 1

| Center Number | Atomic Number | Atomic Type | Coordinates (Angstroms) |   |   |
|---------------|---------------|-------------|-------------------------|---|---|
|               |               |             | X                       | Y | Z |



|    |    |   |           |           |           |     |    |   |           |           |           |
|----|----|---|-----------|-----------|-----------|-----|----|---|-----------|-----------|-----------|
|    |    |   |           |           |           | 69  | 6  | 0 | 1.867567  | 4.408303  | 1.392783  |
| 1  | 6  | 0 | -2.107635 | 1.930863  | 0.516912  | 70  | 6  | 0 | 1.584752  | 5.014952  | 0.167077  |
| 2  | 8  | 0 | -3.046951 | 2.899469  | 0.401299  | 71  | 1  | 0 | 1.914747  | 4.890506  | -1.945114 |
| 3  | 8  | 0 | -1.837244 | 1.449598  | -1.090799 | 72  | 1  | 0 | 1.490277  | 4.863760  | 2.304132  |
| 4  | 6  | 0 | -4.392443 | 2.359662  | 0.636227  | 73  | 6  | 0 | 3.446750  | 2.712347  | -2.253887 |
| 5  | 6  | 0 | -4.201548 | 0.830403  | 0.673816  | 74  | 6  | 0 | 2.367461  | 2.366898  | -3.296618 |
| 6  | 6  | 0 | -2.740504 | 0.676259  | 1.106128  | 75  | 6  | 0 | 4.474228  | 3.707457  | -2.830911 |
| 7  | 1  | 0 | -4.681296 | 2.728722  | 1.627116  | 76  | 1  | 0 | 3.989887  | 1.788648  | -2.039635 |
| 8  | 1  | 0 | -4.354031 | 0.397932  | -0.317946 | 77  | 1  | 0 | 1.790627  | 3.252768  | -3.590470 |
| 9  | 1  | 0 | -4.909287 | 0.358862  | 1.360187  | 78  | 1  | 0 | 1.676391  | 1.613610  | -2.906941 |
| 10 | 1  | 0 | -2.266442 | -0.245942 | 0.769827  | 79  | 1  | 0 | 5.267423  | 3.922605  | -2.106186 |
| 11 | 1  | 0 | -2.624305 | 0.744233  | 2.193649  | 80  | 1  | 0 | 4.004405  | 4.660148  | -3.102917 |
| 12 | 8  | 0 | -0.959936 | 2.414007  | 0.959605  | 81  | 6  | 0 | 2.865213  | 2.658726  | 2.893670  |
| 13 | 6  | 0 | -1.342475 | 2.519827  | -1.927690 | 82  | 6  | 0 | 3.840661  | 3.562094  | 3.677003  |
| 14 | 1  | 0 | -2.131426 | 3.266867  | -2.017157 | 83  | 6  | 0 | 1.576162  | 2.434496  | 3.707084  |
| 15 | 1  | 0 | -1.116917 | 2.083637  | -2.902713 | 84  | 1  | 0 | 3.336486  | 1.678969  | 2.783629  |
| 16 | 1  | 0 | -0.444373 | 2.963889  | -1.491825 | 85  | 1  | 0 | 3.406923  | 4.553911  | 3.852961  |
| 17 | 1  | 0 | -1.094472 | 0.632891  | -1.092571 | 86  | 1  | 0 | 4.784185  | 3.708981  | 3.139168  |
| 18 | 1  | 0 | -0.294853 | 1.662273  | 1.110464  | 87  | 1  | 0 | 0.915540  | 1.730310  | 3.197540  |
| 19 | 6  | 0 | 4.282967  | -0.999377 | -0.121899 | 88  | 1  | 0 | 1.028506  | 3.368589  | 3.878492  |
| 20 | 6  | 0 | 3.476786  | 0.136362  | -0.168517 | 89  | 6  | 0 | -2.466213 | -3.022977 | -2.302130 |
| 21 | 6  | 0 | 5.159212  | 1.355544  | 1.019297  | 90  | 6  | 0 | -3.172118 | -4.162962 | -3.065626 |
| 22 | 6  | 0 | 5.912693  | 0.196654  | 1.204881  | 91  | 6  | 0 | -3.071217 | -1.667423 | -2.712823 |
| 23 | 6  | 0 | 5.451997  | -0.996248 | 0.650142  | 92  | 1  | 0 | -1.419329 | -3.004781 | -2.614794 |
| 24 | 1  | 0 | 5.522774  | 2.294201  | 1.426991  | 93  | 1  | 0 | -4.239651 | -4.202344 | -2.817309 |
| 25 | 1  | 0 | 6.831605  | 0.232744  | 1.785432  | 94  | 1  | 0 | -2.745243 | -5.143199 | -2.828078 |
| 26 | 6  | 0 | 6.026469  | -2.386821 | 0.877557  | 95  | 1  | 0 | -2.566990 | -0.843004 | -2.204600 |
| 27 | 1  | 0 | 7.015040  | -2.508566 | 0.412543  | 96  | 1  | 0 | -4.143438 | -1.611469 | -2.488175 |
| 28 | 1  | 0 | 6.140219  | -2.577408 | 1.951965  | 97  | 6  | 0 | -0.328406 | -4.225754 | 2.270297  |
| 29 | 6  | 0 | 3.730007  | -4.291179 | -2.793682 | 98  | 6  | 0 | -0.067964 | -3.196510 | 3.387117  |
| 30 | 1  | 0 | 4.273677  | -5.241280 | -2.694892 | 99  | 6  | 0 | -0.544781 | -5.637187 | 2.852603  |
| 31 | 1  | 0 | 3.558821  | -4.116427 | -3.863185 | 100 | 1  | 0 | 0.577019  | -4.274911 | 1.662057  |
| 32 | 6  | 0 | 2.403173  | -4.309473 | -2.047148 | 101 | 1  | 0 | -0.917173 | -3.127938 | 4.078215  |
| 33 | 6  | 0 | 2.341338  | -3.371407 | -1.008648 | 102 | 1  | 0 | 0.118241  | -2.202613 | 2.970096  |
| 34 | 6  | 0 | 1.280744  | -5.076794 | -2.354231 | 103 | 1  | 0 | -0.690518 | -6.377255 | 2.057573  |
| 35 | 1  | 0 | 1.307919  | -5.833311 | -3.135052 | 104 | 1  | 0 | -1.422361 | -5.675321 | 3.508881  |
| 36 | 6  | 0 | 1.114278  | -3.057437 | -0.427857 | 105 | 1  | 0 | 0.810633  | -3.490551 | 3.973998  |
| 37 | 6  | 0 | 0.103930  | -4.855305 | -1.639043 | 106 | 1  | 0 | 0.326394  | -5.941986 | 3.444840  |
| 38 | 1  | 0 | -0.761969 | -5.477916 | -1.841857 | 107 | 1  | 0 | -2.957791 | -1.520683 | -3.793978 |
| 39 | 8  | 0 | 2.241400  | 0.017272  | -0.805333 | 108 | 1  | 0 | -3.086726 | -4.010569 | -4.148471 |
| 40 | 8  | 0 | 1.071231  | -1.980330 | 0.457045  | 109 | 1  | 0 | 1.827161  | 2.016711  | 4.690000  |
| 41 | 15 | 0 | 0.860516  | -0.427616 | -0.029227 | 110 | 1  | 0 | 4.072391  | 3.121138  | 4.654232  |
| 42 | 8  | 0 | -0.196086 | -0.369101 | -1.129132 | 111 | 1  | 0 | 4.940964  | 3.295403  | -3.733880 |
| 43 | 8  | 0 | 0.638683  | 0.363429  | 1.231596  | 112 | 1  | 0 | 2.832719  | 1.962724  | -4.203869 |
| 44 | 6  | 0 | 3.903896  | 1.359028  | 0.377518  | 113 | 6  | 0 | 0.777853  | 6.303888  | 0.078770  |
| 45 | 6  | 0 | -0.037292 | -3.816971 | -0.695110 | 114 | 6  | 0 | -0.567123 | 6.214962  | 0.823358  |
| 46 | 6  | 0 | -5.362391 | 2.891485  | -0.390541 | 115 | 1  | 0 | -0.418506 | 6.134389  | 1.906671  |
| 47 | 6  | 0 | -6.448675 | 3.672323  | 0.016307  | 116 | 1  | 0 | -1.163937 | 7.116937  | 0.640853  |
| 48 | 6  | 0 | -5.204657 | 2.605734  | -1.754527 | 117 | 1  | 0 | -1.147939 | 5.342830  | 0.507420  |
| 49 | 6  | 0 | -7.369184 | 4.154955  | -0.916419 | 118 | 6  | 0 | 1.599889  | 7.511589  | 0.570982  |
| 50 | 1  | 0 | -6.575277 | 3.906479  | 1.070938  | 119 | 1  | 0 | 1.030733  | 8.442480  | 0.457632  |
| 51 | 6  | 0 | -6.116910 | 3.093710  | -2.687899 | 120 | 1  | 0 | 1.858482  | 7.403479  | 1.631276  |
| 52 | 1  | 0 | -4.364265 | 2.000806  | -2.083087 | 121 | 1  | 0 | 2.534848  | 7.611569  | 0.008553  |
| 53 | 6  | 0 | -7.203572 | 3.867825  | -2.270888 | 122 | 6  | 0 | -5.280730 | -3.307215 | 1.870819  |
| 54 | 1  | 0 | -8.209416 | 4.758423  | -0.584039 | 123 | 6  | 0 | -5.818858 | -4.725589 | 2.148254  |
| 55 | 1  | 0 | -5.982654 | 2.867811  | -3.742371 | 124 | 1  | 0 | -5.183959 | -5.249794 | 2.872521  |
| 56 | 1  | 0 | -7.915611 | 4.244972  | -2.999934 | 125 | 1  | 0 | -6.835419 | -4.684313 | 2.558300  |
| 57 | 6  | 0 | -1.361250 | -3.596692 | -0.024468 | 126 | 1  | 0 | -5.843423 | -5.324946 | 1.231791  |
| 58 | 6  | 0 | -2.507480 | -3.257270 | -0.789545 | 127 | 6  | 0 | -5.318640 | -2.453278 | 3.150331  |
| 59 | 6  | 0 | -1.494679 | -3.811057 | 1.372014  | 128 | 1  | 0 | -6.345133 | -2.371468 | 3.526819  |
| 60 | 6  | 0 | -3.745120 | -3.150248 | -0.142192 | 129 | 1  | 0 | -4.711322 | -2.894316 | 3.949055  |
| 61 | 6  | 0 | -2.757313 | -3.688520 | 1.962208  | 130 | 1  | 0 | -4.940299 | -1.441039 | 2.968470  |
| 62 | 6  | 0 | -3.900217 | -3.365722 | 1.228173  | 131 | 8  | 0 | 5.132626  | -3.364142 | 0.334889  |
| 63 | 1  | 0 | -4.625778 | -2.902122 | -0.731019 | 132 | 8  | 0 | 4.548039  | -3.230793 | -2.286284 |
| 64 | 1  | 0 | -2.847646 | -3.870377 | 3.029829  | 133 | 14 | 0 | 4.048043  | -2.710694 | -0.769385 |
| 65 | 6  | 0 | 3.096558  | 2.619872  | 0.307288  | 134 | 1  | 0 | -5.955755 | -2.838106 | 1.141203  |
| 66 | 6  | 0 | 2.855478  | 3.236908  | -0.944144 | 135 | 1  | 0 | 0.556367  | 6.470712  | -0.984914 |
| 67 | 6  | 0 | 2.604918  | 3.224681  | 1.494433  |     |    |   |           |           |           |
| 68 | 6  | 0 | 2.097597  | 4.414393  | -0.983539 |     |    |   |           |           |           |

TS-1st-(S)-reaction pathway: S-anti(S)-1ea (Oxa-SPISOL)

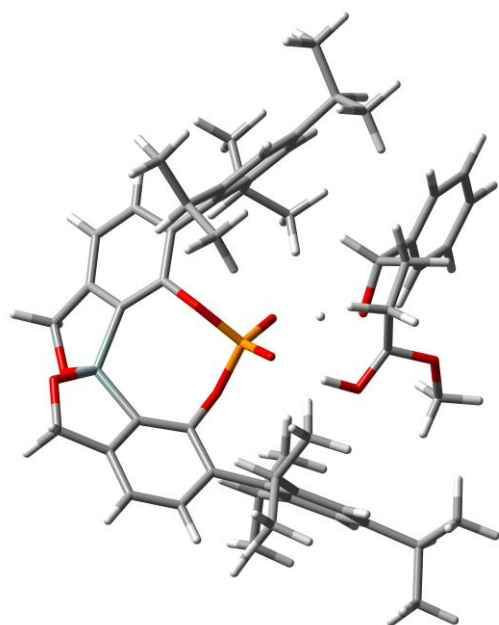

B3LYP/6-31G(d); E(RB3LYP) = -3445.49532186 Hartree  
 Zero-point correction= 1.140788 Hartree  
 Thermal correction to Energy= 1.207317 Hartree  
 Thermal correction to Enthalpy= 1.208261 Hartree  
 Thermal correction to Gibbs Free Energy= 1.035190 Hartree  
 Sum of electronic and zero-point Energies= -3444.354534 Hartree  
 Sum of electronic and thermal Energies= -3444.288005 Hartree  
 Sum of electronic and thermal Enthalpies= -3444.287061 Hartree  
 Sum of electronic and thermal Free Energies= -3444.460132 Hartree

The number of Imaginary frequencies = 1

| Center Number | Atomic Number | Atomic Type | Coordinates (Angstroms) |           |           |
|---------------|---------------|-------------|-------------------------|-----------|-----------|
|               |               |             | X                       | Y         | Z         |
| 1             | 6             | 0           | -0.340300               | -3.131716 | 0.639205  |
| 2             | 8             | 0           | 0.760397                | -2.513837 | -0.489939 |
| 3             | 6             | 0           | 2.104169                | -2.830102 | -0.034434 |
| 4             | 6             | 0           | 1.942603                | -3.446838 | 1.383131  |
| 5             | 6             | 0           | 0.554917                | -3.019241 | 1.859188  |
| 6             | 1             | 0           | 2.630919                | -1.872333 | 0.039997  |
| 7             | 1             | 0           | 2.003305                | -4.536698 | 1.326167  |
| 8             | 1             | 0           | 2.730456                | -3.095672 | 2.054297  |
| 9             | 1             | 0           | 0.164487                | -3.657678 | 2.656628  |
| 10            | 1             | 0           | 0.540511                | -1.979628 | 2.198118  |
| 11            | 8             | 0           | -1.436418               | -2.397123 | 0.528052  |
| 12            | 8             | 0           | -0.498428               | -4.417355 | 0.268294  |
| 13            | 6             | 0           | -1.332540               | -4.663237 | -0.878113 |
| 14            | 1             | 0           | -1.335848               | -5.746624 | -1.002430 |
| 15            | 1             | 0           | -2.343368               | -4.289039 | -0.710158 |
| 16            | 1             | 0           | -0.903484               | -4.185270 | -1.763020 |
| 17            | 1             | 0           | 0.618180                | -1.393931 | -0.670896 |
| 18            | 1             | 0           | -1.300585               | -1.476387 | 0.919754  |
| 19            | 6             | 0           | -2.515235               | 3.365482  | -0.262748 |
| 20            | 6             | 0           | -2.646991               | 1.977131  | -0.314500 |
| 21            | 6             | 0           | -4.841415               | 2.189157  | 0.620710  |
| 22            | 6             | 0           | -4.671261               | 3.557479  | 0.813556  |
| 23            | 6             | 0           | -3.477990               | 4.142180  | 0.395820  |
| 24            | 1             | 0           | -5.775211               | 1.724906  | 0.922867  |
| 25            | 1             | 0           | -5.451509               | 4.141947  | 1.295459  |
| 26            | 6             | 0           | -3.024504               | 5.567703  | 0.673050  |
| 27            | 1             | 0           | -3.624662               | 6.307699  | 0.124613  |
| 28            | 1             | 0           | -3.118652               | 5.791907  | 1.742812  |
| 29            | 6             | 0           | 0.267888                | 5.565553  | -2.639791 |

|    |    |   |           |           |           |
|----|----|---|-----------|-----------|-----------|
| 30 | 1  | 0 | 0.431578  | 6.641348  | -2.484710 |
| 31 | 1  | 0 | 0.405719  | 5.359132  | -3.708359 |
| 32 | 6  | 0 | 1.224664  | 4.714905  | -1.815470 |
| 33 | 6  | 0 | 0.578464  | 3.919139  | -0.860253 |
| 34 | 6  | 0 | 2.603506  | 4.608564  | -1.986052 |
| 35 | 1  | 0 | 3.139239  | 5.241657  | -2.689458 |
| 36 | 6  | 0 | 1.260904  | 2.871537  | -0.243461 |
| 37 | 8  | 0 | -1.570997 | 1.250765  | -0.835517 |
| 38 | 8  | 0 | 0.528129  | 2.011241  | 0.576925  |
| 39 | 15 | 0 | -0.321133 | 0.702377  | 0.080658  |
| 40 | 8  | 0 | 0.517259  | -0.123425 | -0.899121 |
| 41 | 8  | 0 | -0.808800 | 0.025389  | 1.335254  |
| 42 | 6  | 0 | -3.829022 | 1.346431  | 0.112244  |
| 43 | 6  | 0 | 2.648493  | 2.717694  | -0.403308 |
| 44 | 6  | 0 | 2.826706  | -3.733740 | -1.016598 |
| 45 | 6  | 0 | 2.303824  | -4.029572 | -2.278938 |
| 46 | 6  | 0 | 4.073784  | -4.267603 | -0.660289 |
| 47 | 6  | 0 | 3.006698  | -4.851444 | -3.162863 |
| 48 | 1  | 0 | 1.348257  | -3.607828 | -2.569263 |
| 49 | 6  | 0 | 4.777801  | -5.084667 | -1.544375 |
| 50 | 1  | 0 | 4.499680  | -4.044609 | 0.315235  |
| 51 | 6  | 0 | 4.244277  | -5.382439 | -2.800167 |
| 52 | 1  | 0 | 2.584251  | -5.072754 | -4.139574 |
| 53 | 1  | 0 | 5.742457  | -5.490279 | -1.250712 |
| 54 | 1  | 0 | 4.790619  | -6.020595 | -3.489370 |
| 55 | 6  | 0 | -4.101846 | -0.128517 | 0.083494  |
| 56 | 6  | 0 | -4.225231 | -0.817101 | -1.147722 |
| 57 | 6  | 0 | -4.371079 | -0.814741 | 1.298371  |
| 58 | 6  | 0 | -4.630627 | -2.157039 | -1.135627 |
| 59 | 6  | 0 | -4.785257 | -2.149514 | 1.245296  |
| 60 | 6  | 0 | -4.930991 | -2.842363 | 0.042540  |
| 61 | 1  | 0 | -4.738031 | -2.680254 | -2.083990 |
| 62 | 1  | 0 | -4.997907 | -2.661188 | 2.179636  |
| 63 | 6  | 0 | 3.292051  | 3.652079  | -1.243007 |
| 64 | 1  | 0 | 4.369890  | 3.574661  | -1.350848 |
| 65 | 6  | 0 | 3.464380  | 1.629883  | 0.226424  |
| 66 | 6  | 0 | 4.168715  | 0.714269  | -0.599999 |
| 67 | 6  | 0 | 3.610367  | 1.555989  | 1.634198  |
| 68 | 6  | 0 | 4.988637  | -0.245970 | 0.005752  |
| 69 | 6  | 0 | 4.450830  | 0.578990  | 2.181309  |
| 70 | 6  | 0 | 5.156454  | -0.329804 | 1.390491  |
| 71 | 1  | 0 | 5.531209  | -0.945862 | -0.626611 |
| 72 | 1  | 0 | 4.569572  | 0.547258  | 3.260764  |
| 73 | 6  | 0 | -4.232243 | -0.169223 | 2.681488  |
| 74 | 6  | 0 | -5.592762 | -0.067015 | 3.400645  |
| 75 | 6  | 0 | -3.211674 | -0.907484 | 3.570145  |
| 76 | 1  | 0 | -3.850485 | 0.845941  | 2.550435  |
| 77 | 1  | 0 | -6.012458 | -1.059067 | 3.605913  |
| 78 | 1  | 0 | -6.329860 | 0.483528  | 2.805458  |
| 79 | 1  | 0 | -2.220647 | -0.892650 | 3.111255  |
| 80 | 1  | 0 | -3.502711 | -1.949404 | 3.749218  |
| 81 | 6  | 0 | -3.986926 | -0.148924 | -2.501751 |
| 82 | 6  | 0 | -2.837446 | -0.819081 | -3.278434 |
| 83 | 6  | 0 | -5.277383 | -0.107127 | -3.344552 |
| 84 | 1  | 0 | -3.692273 | 0.888279  | -2.327269 |
| 85 | 1  | 0 | -3.072161 | -1.862626 | -3.522550 |
| 86 | 1  | 0 | -1.909226 | -0.800650 | -2.699918 |
| 87 | 1  | 0 | -6.085476 | 0.402572  | -2.807785 |
| 88 | 1  | 0 | -5.629034 | -1.114220 | -3.598328 |
| 89 | 6  | 0 | 2.943438  | 2.543692  | 2.592416  |
| 90 | 6  | 0 | 2.015859  | 1.839361  | 3.600855  |
| 91 | 6  | 0 | 3.993480  | 3.411963  | 3.315075  |
| 92 | 1  | 0 | 3.222729  | 3.225336  | 2.007517  |
| 93 | 1  | 0 | 2.574018  | 1.159243  | 4.256241  |
| 94 | 1  | 0 | 1.238484  | 1.265583  | 3.088047  |
| 95 | 1  | 0 | 4.629168  | 3.945252  | 2.599187  |
| 96 | 1  | 0 | 4.646826  | 2.808109  | 3.956069  |
| 97 | 6  | 0 | 4.102130  | 0.735689  | -2.130894 |
| 98 | 6  | 0 | 5.474800  | 1.078326  | -2.745396 |

|     |    |   |           |           |           |
|-----|----|---|-----------|-----------|-----------|
| 99  | 6  | 0 | 3.558596  | -0.576894 | -2.721856 |
| 100 | 1  | 0 | 3.404683  | 1.519105  | -2.432927 |
| 101 | 1  | 0 | 6.217361  | 0.301764  | -2.526825 |
| 102 | 1  | 0 | 5.868806  | 2.026178  | -2.360970 |
| 103 | 1  | 0 | 2.542198  | -0.765575 | -2.366771 |
| 104 | 1  | 0 | 4.184638  | -1.438288 | -2.465309 |
| 105 | 1  | 0 | 1.522929  | 2.581056  | 4.240926  |
| 106 | 1  | 0 | 3.499404  | 4.156302  | 3.951020  |
| 107 | 1  | 0 | 3.525225  | -0.508622 | -3.816215 |
| 108 | 1  | 0 | 5.394227  | 1.162033  | -3.835890 |
| 109 | 1  | 0 | -5.479603 | 0.450154  | 4.361141  |
| 110 | 1  | 0 | -3.139558 | -0.412135 | 4.546317  |
| 111 | 1  | 0 | -5.102038 | 0.430333  | -4.284310 |
| 112 | 1  | 0 | -2.659491 | -0.290794 | -4.222962 |
| 113 | 6  | 0 | 6.147686  | -1.327142 | 1.980212  |
| 114 | 6  | 0 | 7.514463  | -0.652019 | 2.219192  |
| 115 | 1  | 0 | 7.427318  | 0.147667  | 2.964499  |
| 116 | 1  | 0 | 8.250485  | -1.378182 | 2.585592  |
| 117 | 1  | 0 | 7.902219  | -0.206954 | 1.296658  |
| 118 | 6  | 0 | 5.654840  | -2.012157 | 3.265496  |
| 119 | 1  | 0 | 5.548226  | -1.299128 | 4.090955  |
| 120 | 1  | 0 | 4.683352  | -2.497735 | 3.119053  |
| 121 | 1  | 0 | 6.370470  | -2.777468 | 3.587764  |
| 122 | 6  | 0 | -5.452267 | -4.274061 | -0.011186 |
| 123 | 6  | 0 | -4.870435 | -5.184874 | 1.083706  |
| 124 | 1  | 0 | -5.223536 | -4.894581 | 2.080069  |
| 125 | 1  | 0 | -5.181704 | -6.223290 | 0.919978  |
| 126 | 1  | 0 | -3.775650 | -5.152951 | 1.097811  |
| 127 | 6  | 0 | -6.994266 | -4.294051 | 0.030095  |
| 128 | 1  | 0 | -7.375250 | -5.318518 | -0.063762 |
| 129 | 1  | 0 | -7.362212 | -3.881635 | 0.977368  |
| 130 | 1  | 0 | -7.419820 | -3.694630 | -0.781945 |
| 131 | 14 | 0 | -1.164552 | 4.510167  | -0.775128 |
| 132 | 8  | 0 | -1.081106 | 5.240236  | -2.285631 |
| 133 | 8  | 0 | -1.650783 | 5.707259  | 0.298401  |
| 134 | 1  | 0 | 6.300037  | -2.111758 | 1.225173  |
| 135 | 1  | 0 | -5.147912 | -4.689618 | -0.982648 |

Sum of electronic and thermal Free Energies= -3444.460224 Hartree  
The number of Imaginary frequencies = 1

| Center Number | Atomic Number | Atomic Type | Coordinates (Angstroms) |           |           |
|---------------|---------------|-------------|-------------------------|-----------|-----------|
|               |               |             | X                       | Y         | Z         |
| 1             | 6             | 0           | 1.059876                | -4.104716 | 0.059629  |
| 2             | 6             | 0           | 1.656121                | -2.846808 | -0.026334 |
| 3             | 6             | 0           | 3.587236                | -3.731671 | 1.076755  |
| 4             | 6             | 0           | 2.943001                | -4.942714 | 1.319626  |
| 5             | 6             | 0           | 1.654178                | -5.119077 | 0.821143  |
| 6             | 1             | 0           | 4.608707                | -3.600416 | 1.418556  |
| 7             | 1             | 0           | 3.444719                | -5.722870 | 1.887258  |
| 8             | 6             | 0           | 0.728572                | -6.297865 | 1.086048  |
| 9             | 1             | 0           | 1.106721                | -7.228941 | 0.640913  |
| 10            | 1             | 0           | 0.628500                | -6.462971 | 2.166046  |
| 11            | 6             | 0           | -1.942034               | -5.369245 | -2.675753 |
| 12            | 1             | 0           | -2.496293               | -6.313304 | -2.576435 |
| 13            | 1             | 0           | -1.823392               | -5.166020 | -3.747426 |
| 14            | 6             | 0           | -2.659698               | -4.210253 | -1.999609 |
| 15            | 6             | 0           | -1.942513               | -3.659513 | -0.930320 |
| 16            | 6             | 0           | -3.864199               | -3.631560 | -2.394320 |
| 17            | 1             | 0           | -4.461930               | -4.055493 | -3.197813 |
| 18            | 6             | 0           | -2.309727               | -2.424777 | -0.396017 |
| 19            | 6             | 0           | -4.291624               | -2.479051 | -1.739191 |
| 20            | 1             | 0           | -5.245029               | -2.038450 | -2.014645 |
| 21            | 8             | 0           | 0.918369                | -1.824684 | -0.630456 |
| 22            | 8             | 0           | -1.457020               | -1.859224 | 0.551409  |
| 23            | 15            | 0           | -0.160528               | -0.906503 | 0.211246  |
| 24            | 8             | 0           | -0.570974               | 0.171054  | -0.790588 |
| 25            | 8             | 0           | 0.402533                | -0.488250 | 1.540883  |
| 26            | 6             | 0           | 2.961228                | -2.632572 | 0.449929  |
| 27            | 6             | 0           | -3.518181               | -1.808779 | -0.766344 |
| 28            | 6             | 0           | 3.750013                | -1.362521 | 0.311727  |
| 29            | 6             | 0           | 4.172497                | -0.922550 | -0.969559 |
| 30            | 6             | 0           | 4.209854                | -0.683069 | 1.469790  |
| 31            | 6             | 0           | 5.060180                | 0.156242  | -1.060088 |
| 32            | 6             | 0           | 5.109094                | 0.380453  | 1.316182  |
| 33            | 6             | 0           | 5.565267                | 0.807769  | 0.068325  |
| 34            | 1             | 0           | 5.395640                | 0.469321  | -2.045920 |
| 35            | 1             | 0           | 5.483388                | 0.882304  | 2.205764  |
| 36            | 6             | 0           | -4.048260               | -0.521701 | -0.208315 |
| 37            | 6             | 0           | -4.314923               | 0.567081  | -1.079497 |
| 38            | 6             | 0           | -4.411299               | -0.424916 | 1.160002  |
| 39            | 6             | 0           | -4.962273               | 1.699568  | -0.568001 |
| 40            | 6             | 0           | -5.034627               | 0.742012  | 1.616806  |
| 41            | 6             | 0           | -5.337448               | 1.812251  | 0.771618  |
| 42            | 1             | 0           | -5.185610               | 2.525245  | -1.240992 |
| 43            | 1             | 0           | -5.318368               | 0.800251  | 2.664591  |
| 44            | 6             | 0           | 0.818450                | 2.719275  | 0.926037  |
| 45            | 8             | 0           | 0.861840                | 4.059852  | 1.132316  |
| 46            | 8             | 0           | -0.547358               | 2.499658  | -0.009937 |
| 47            | 1             | 0           | 0.557792                | 1.068503  | 1.897753  |
| 48            | 6             | 0           | 1.753025                | 4.711405  | 0.167256  |
| 49            | 6             | 0           | 2.094817                | 3.611060  | -0.857483 |
| 50            | 6             | 0           | 1.929645                | 2.327709  | -0.038932 |
| 51            | 1             | 0           | 2.648419                | 4.986018  | 0.737428  |
| 52            | 1             | 0           | 1.385990                | 3.632734  | -1.689808 |
| 53            | 1             | 0           | 3.100279                | 3.739416  | -1.264658 |
| 54            | 1             | 0           | 1.694014                | 1.443958  | -0.631507 |
| 55            | 1             | 0           | 2.819255                | 2.106976  | 0.560386  |
| 56            | 8             | 0           | 0.602138                | 2.067087  | 2.063044  |
| 57            | 6             | 0           | -1.764243               | 2.820900  | 0.706107  |
| 58            | 1             | 0           | -2.583155               | 2.757828  | -0.008243 |
| 59            | 1             | 0           | -1.925235               | 2.120801  | 1.527864  |
| 60            | 1             | 0           | -1.657663               | 3.836513  | 1.088224  |
| 61            | 6             | 0           | 1.114166                | 5.963175  | -0.383223 |
| 62            | 6             | 0           | -0.105979               | 5.910523  | -1.072380 |
| 63            | 6             | 0           | 1.751061                | 7.198029  | -0.226697 |

**TS-2nd-(S)-reaction pathway: S-si/(S)-1ea (Oxa-SPISLIOL)**

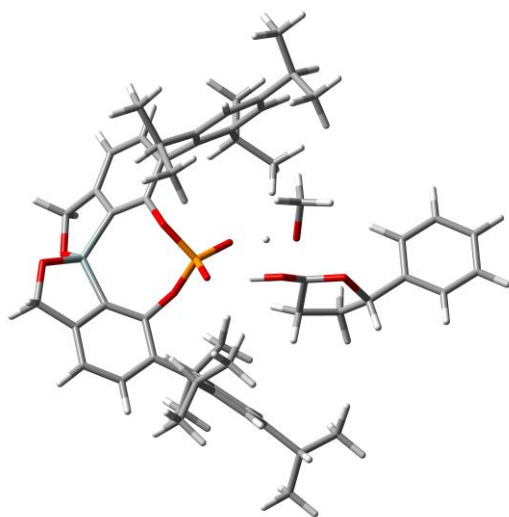

B3LYP/6-31G(d); E(RB3LYP) = -3445.49705483 Hartree  
Zero-point correction= 1.141688 Hartree  
Thermal correction to Energy= 1.208234 Hartree  
Thermal correction to Enthalpy= 1.209178 Hartree  
Thermal correction to Gibbs Free Energy= 1.036831 Hartree  
Sum of electronic and zero-point Energies= -3444.355367 Hartree  
Sum of electronic and thermal Energies= -3444.288821 Hartree  
Sum of electronic and thermal Enthalpies= -3444.287877 Hartree

|     |   |   |           |           |           |
|-----|---|---|-----------|-----------|-----------|
| 64  | 6 | 0 | -0.672320 | 7.072083  | -1.593292 |
| 65  | 1 | 0 | -0.610888 | 4.956695  | -1.196303 |
| 66  | 6 | 0 | 1.189479  | 8.362119  | -0.755725 |
| 67  | 1 | 0 | 2.693160  | 7.250572  | 0.314517  |
| 68  | 6 | 0 | -0.024638 | 8.301200  | -1.438813 |
| 69  | 1 | 0 | -1.619796 | 7.019506  | -2.123028 |
| 70  | 1 | 0 | 1.697790  | 9.313925  | -0.627578 |
| 71  | 1 | 0 | -0.466853 | 9.205545  | -1.848004 |
| 72  | 1 | 0 | -0.577305 | 1.450762  | -0.353112 |
| 73  | 6 | 0 | -4.213065 | -1.565986 | 2.158859  |
| 74  | 6 | 0 | -3.282903 | -1.163389 | 3.319273  |
| 75  | 6 | 0 | -5.565044 | -2.089111 | 2.685214  |
| 76  | 1 | 0 | -3.735760 | -2.400006 | 1.640775  |
| 77  | 1 | 0 | -3.704917 | -0.339836 | 3.908328  |
| 78  | 1 | 0 | -2.299814 | -0.856705 | 2.950178  |
| 79  | 1 | 0 | -6.215593 | -2.407623 | 1.862827  |
| 80  | 1 | 0 | -6.101924 | -1.323968 | 3.258352  |
| 81  | 6 | 0 | -3.930646 | 0.573550  | -2.562866 |
| 82  | 6 | 0 | -5.172754 | 0.634131  | -3.474660 |
| 83  | 6 | 0 | -2.957284 | 1.717531  | -2.908720 |
| 84  | 1 | 0 | -3.403084 | -0.356983 | -2.783650 |
| 85  | 1 | 0 | -5.726031 | 1.570856  | -3.337483 |
| 86  | 1 | 0 | -5.867389 | -0.188893 | -3.273262 |
| 87  | 1 | 0 | -2.032923 | 1.628945  | -2.332417 |
| 88  | 1 | 0 | -3.399945 | 2.703033  | -2.717892 |
| 89  | 6 | 0 | 3.788856  | -1.067303 | 2.891290  |
| 90  | 6 | 0 | 4.954683  | -1.696200 | 3.682880  |
| 91  | 6 | 0 | 3.220672  | 0.128608  | 3.679033  |
| 92  | 1 | 0 | 2.987417  | -1.806943 | 2.818310  |
| 93  | 1 | 0 | 5.776002  | -0.980465 | 3.809653  |
| 94  | 1 | 0 | 5.364891  | -2.581976 | 3.187199  |
| 95  | 1 | 0 | 2.398670  | 0.607341  | 3.144681  |
| 96  | 1 | 0 | 3.986649  | 0.887950  | 3.878286  |
| 97  | 6 | 0 | 3.754873  | -1.617225 | -2.267021 |
| 98  | 6 | 0 | 2.945407  | -0.682459 | -3.185983 |
| 99  | 6 | 0 | 4.970855  | -2.209356 | -3.007512 |
| 100 | 1 | 0 | 3.104337  | -2.457010 | -2.014240 |
| 101 | 1 | 0 | 3.532614  | 0.192941  | -3.489860 |
| 102 | 1 | 0 | 2.035354  | -0.334410 | -2.687795 |
| 103 | 1 | 0 | 5.529984  | -2.898026 | -2.364224 |
| 104 | 1 | 0 | 5.664013  | -1.428854 | -3.342866 |
| 105 | 1 | 0 | 2.839825  | -0.212159 | 4.649058  |
| 106 | 1 | 0 | 4.617898  | -1.995932 | 4.682590  |
| 107 | 1 | 0 | 4.642235  | -2.764260 | -3.894369 |
| 108 | 1 | 0 | 2.646906  | -1.213069 | -4.098208 |
| 109 | 1 | 0 | -4.876124 | 0.575765  | -4.528811 |
| 110 | 1 | 0 | -2.694294 | 1.677041  | -3.972793 |
| 111 | 1 | 0 | -3.137522 | -2.012634 | 3.997681  |
| 112 | 1 | 0 | -5.407519 | -2.949518 | 3.346488  |
| 113 | 6 | 0 | 6.619991  | 1.902863  | -0.039538 |
| 114 | 6 | 0 | 7.945967  | 1.347053  | -0.595633 |
| 115 | 1 | 0 | 7.824393  | 0.985931  | -1.623729 |
| 116 | 1 | 0 | 8.719793  | 2.124217  | -0.602901 |
| 117 | 1 | 0 | 8.307737  | 0.509756  | 0.010722  |
| 118 | 6 | 0 | 6.147096  | 3.112678  | -0.864851 |
| 119 | 1 | 0 | 6.926941  | 3.882526  | -0.905362 |
| 120 | 1 | 0 | 5.909160  | 2.827444  | -1.896510 |
| 121 | 1 | 0 | 5.251130  | 3.564554  | -0.424702 |
| 122 | 6 | 0 | -6.073745 | 3.047266  | 1.275781  |
| 123 | 6 | 0 | -5.318806 | 3.760049  | 2.412996  |
| 124 | 1 | 0 | -5.852842 | 4.666679  | 2.721470  |
| 125 | 1 | 0 | -5.222021 | 3.116386  | 3.294990  |
| 126 | 1 | 0 | -4.309600 | 4.052437  | 2.101756  |
| 127 | 6 | 0 | -7.515133 | 2.707806  | 1.703127  |
| 128 | 1 | 0 | -8.053938 | 3.614338  | 2.004169  |
| 129 | 1 | 0 | -8.069607 | 2.236171  | 0.884569  |
| 130 | 1 | 0 | -7.523446 | 2.015949  | 2.553668  |
| 131 | 8 | 0 | -0.643243 | -5.525615 | -2.096067 |
| 132 | 8 | 0 | -0.567673 | -6.015376 | 0.547919  |

|     |    |   |           |           |           |
|-----|----|---|-----------|-----------|-----------|
| 133 | 14 | 0 | -0.522927 | -4.784136 | -0.592973 |
| 134 | 1  | 0 | 6.817683  | 2.260185  | 0.980469  |
| 135 | 1  | 0 | -6.138957 | 3.749826  | 0.433249  |

TS-1st-(S)-reaction pathway: S-syn(S)-1ea (Oxa-SPISIOI)

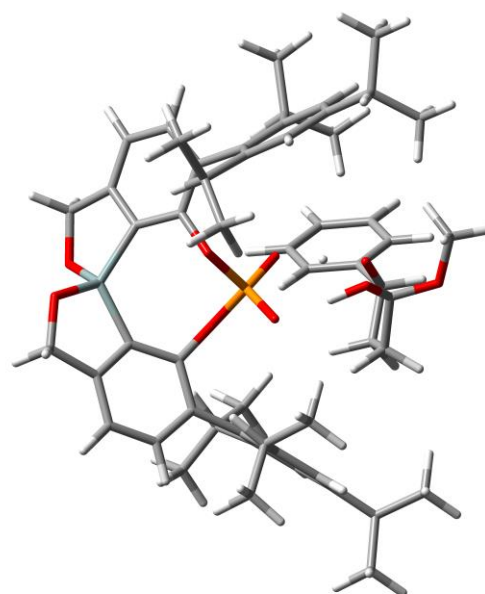

B3LYP/6-31G(d); E(RB3LYP) = -3445.49527041 Hartree  
 Zero-point correction= 1.140506 Hartree  
 Thermal correction to Energy= 1.207239 Hartree  
 Thermal correction to Enthalpy= 1.208184 Hartree  
 Thermal correction to Gibbs Free Energy= 1.035793 Hartree  
 Sum of electronic and zero-point Energies= -3444.354764 Hartree  
 Sum of electronic and thermal Energies= -3444.288031 Hartree  
 Sum of electronic and thermal Enthalpies= -3444.287087 Hartree  
 Sum of electronic and thermal Free Energies= -3444.459477 Hartree  
 The number of Imaginary frequencies = 1

| Center Number | Atomic Number | Atomic Type | Coordinates (Angstroms) |           |           |
|---------------|---------------|-------------|-------------------------|-----------|-----------|
|               |               |             | X                       | Y         | Z         |
| 1             | 6             | 0           | -1.559823               | 3.278446  | 1.021508  |
| 2             | 6             | 0           | -2.040747               | 2.181450  | 0.312555  |
| 3             | 6             | 0           | -4.091281               | 2.330292  | 1.527374  |
| 4             | 6             | 0           | -3.563606               | 3.312552  | 2.365797  |
| 5             | 6             | 0           | -2.273715               | 3.778512  | 2.116807  |
| 6             | 1             | 0           | -5.113453               | 2.000578  | 1.682362  |
| 7             | 1             | 0           | -4.158510               | 3.700040  | 3.189622  |
| 8             | 6             | 0           | -1.461520               | 4.747679  | 2.965948  |
| 9             | 1             | 0           | -1.902925               | 5.753848  | 2.982862  |
| 10            | 1             | 0           | -1.408522               | 4.390616  | 4.001967  |
| 11            | 6             | 0           | 1.312957                | 5.872209  | -0.699320 |
| 12            | 1             | 0           | 1.815714                | 6.702691  | -0.183623 |
| 13            | 1             | 0           | 1.171135                | 6.170100  | -1.745801 |
| 14            | 6             | 0           | 2.117801                | 4.584013  | -0.626784 |
| 15            | 6             | 0           | 1.473166                | 3.560507  | 0.080507  |
| 16            | 6             | 0           | 3.334444                | 4.332576  | -1.257391 |
| 17            | 1             | 0           | 3.865866                | 5.114117  | -1.795289 |
| 18            | 6             | 0           | 1.944004                | 2.249646  | -0.002593 |
| 19            | 8             | 0           | -1.185217               | 1.603004  | -0.629365 |
| 20            | 8             | 0           | 1.154572                | 1.249625  | 0.572104  |
| 21            | 15            | 0           | -0.053749               | 0.482747  | -0.245862 |
| 22            | 8             | 0           | 0.448612                | -0.079621 | -1.547289 |
| 23            | 8             | 0           | -0.626717               | -0.473845 | 0.799495  |
| 24            | 6             | 0           | -3.344857               | 1.697771  | 0.509975  |
| 25            | 6             | 0           | 3.179384                | 1.959162  | -0.607021 |

|    |   |   |           |           |           |     |    |   |           |           |           |
|----|---|---|-----------|-----------|-----------|-----|----|---|-----------|-----------|-----------|
| 26 | 6 | 0 | -3.973526 | 0.605282  | -0.303390 | 95  | 1  | 0 | -5.690327 | 3.065716  | -2.167646 |
| 27 | 6 | 0 | -4.182028 | 0.786797  | -1.693762 | 96  | 1  | 0 | -5.557106 | 2.218082  | -3.716187 |
| 28 | 6 | 0 | -4.445984 | -0.579406 | 0.323866  | 97  | 6  | 0 | -4.271883 | -0.864991 | 1.818265  |
| 29 | 6 | 0 | -4.847131 | -0.211751 | -2.415223 | 98  | 6  | 0 | -5.614047 | -0.769719 | 2.573534  |
| 30 | 6 | 0 | -5.112495 | -1.535779 | -0.448924 | 99  | 6  | 0 | -3.624685 | -2.236884 | 2.086156  |
| 31 | 6 | 0 | -5.326766 | -1.376817 | -1.819983 | 100 | 1  | 0 | -3.595782 | -0.112466 | 2.232492  |
| 32 | 1 | 0 | -5.009968 | -0.067351 | -3.480951 | 101 | 1  | 0 | -6.319966 | -1.528883 | 2.215436  |
| 33 | 1 | 0 | -5.477528 | -2.435061 | 0.040724  | 102 | 1  | 0 | -6.093916 | 0.206585  | 2.446866  |
| 34 | 6 | 0 | 3.863536  | 3.045157  | -1.192835 | 103 | 1  | 0 | -2.688471 | -2.349415 | 1.536425  |
| 35 | 1 | 0 | 4.829730  | 2.846421  | -1.646493 | 104 | 1  | 0 | -4.288876 | -3.062787 | 1.802905  |
| 36 | 6 | 0 | 3.839456  | 0.609838  | -0.631977 | 105 | 1  | 0 | 2.234498  | -0.197699 | -4.868092 |
| 37 | 6 | 0 | 4.018025  | -0.080527 | -1.858096 | 106 | 1  | 0 | 4.167014  | 1.381073  | -5.021376 |
| 38 | 6 | 0 | 4.417056  | 0.095321  | 0.556014  | 107 | 1  | 0 | 5.529080  | 2.347826  | 2.963139  |
| 39 | 6 | 0 | 4.776468  | -1.257842 | -1.864996 | 108 | 1  | 0 | 4.041453  | 0.572651  | 4.009271  |
| 40 | 6 | 0 | 5.160162  | -1.089522 | 0.487795  | 109 | 1  | 0 | -2.450728 | 2.674642  | -4.067074 |
| 41 | 6 | 0 | 5.363304  | -1.778933 | -0.709324 | 110 | 1  | 0 | -4.691985 | 3.743023  | -3.468930 |
| 42 | 1 | 0 | 4.924233  | -1.773805 | -2.810247 | 111 | 1  | 0 | -3.405775 | -2.346848 | 3.154953  |
| 43 | 1 | 0 | 5.620691  | -1.477400 | 1.392664  | 112 | 1  | 0 | -5.462564 | -0.935082 | 3.647295  |
| 44 | 6 | 0 | 0.113599  | -3.311158 | -0.948847 | 113 | 6  | 0 | 6.236973  | -3.027219 | -0.747566 |
| 45 | 8 | 0 | -0.469761 | -2.893090 | 0.560198  | 114 | 6  | 0 | 7.532053  | -2.780560 | -1.546172 |
| 46 | 6 | 0 | 0.503189  | -3.502317 | 1.473467  | 115 | 1  | 0 | 8.182526  | -3.662977 | -1.513293 |
| 47 | 6 | 0 | 1.624664  | -3.216241 | -0.687144 | 116 | 1  | 0 | 7.313122  | -2.565470 | -2.598838 |
| 48 | 1 | 0 | 2.088427  | -4.095480 | -1.140367 | 117 | 1  | 0 | 8.089780  | -1.929205 | -1.141227 |
| 49 | 1 | 0 | 2.018828  | -2.328710 | -1.183460 | 118 | 6  | 0 | 5.489257  | -4.260344 | -1.286427 |
| 50 | 8 | 0 | -0.475677 | -2.503492 | -1.823560 | 119 | 1  | 0 | 5.169694  | -4.113859 | -2.324893 |
| 51 | 8 | 0 | -0.263541 | -4.605773 | -1.082591 | 120 | 1  | 0 | 6.135923  | -5.145568 | -1.260783 |
| 52 | 6 | 0 | -1.639799 | -4.835973 | -1.434725 | 121 | 1  | 0 | 4.596612  | -4.476220 | -0.688776 |
| 53 | 1 | 0 | -1.779456 | -5.915020 | -1.355853 | 122 | 6  | 0 | -6.065931 | -2.424361 | -2.642226 |
| 54 | 1 | 0 | -1.835286 | -4.501945 | -2.455853 | 123 | 6  | 0 | -5.319430 | -3.771301 | -2.666116 |
| 55 | 1 | 0 | -2.305713 | -4.314709 | -0.741976 | 124 | 1  | 0 | -5.257394 | -4.208276 | -1.661983 |
| 56 | 1 | 0 | -0.530676 | -1.753913 | 0.659237  | 125 | 1  | 0 | -5.837752 | -4.491457 | -3.310928 |
| 57 | 1 | 0 | -0.100953 | -1.564406 | -1.791224 | 126 | 1  | 0 | -4.298166 | -3.647101 | -3.042830 |
| 58 | 6 | 0 | 0.287335  | -3.120418 | 2.918622  | 127 | 6  | 0 | -7.519306 | -2.607979 | -2.165827 |
| 59 | 6 | 0 | 0.485684  | -1.815348 | 3.394179  | 128 | 1  | 0 | -8.064288 | -1.657925 | -2.185019 |
| 60 | 6 | 0 | -0.094919 | -4.118562 | 3.824414  | 129 | 1  | 0 | -8.051052 | -3.320471 | -2.808178 |
| 61 | 6 | 0 | 0.302796  | -1.525002 | 4.745919  | 130 | 1  | 0 | -7.556567 | -2.992858 | -1.139706 |
| 62 | 1 | 0 | 0.749165  | -1.017600 | 2.708692  | 131 | 14 | 0 | -0.032370 | 4.292034  | 0.861503  |
| 63 | 6 | 0 | -0.270271 | -3.829446 | 5.178098  | 132 | 8  | 0 | -0.126656 | 4.834233  | 2.448539  |
| 64 | 1 | 0 | -0.254293 | -5.133036 | 3.465913  | 133 | 8  | 0 | 0.029466  | 5.663083  | -0.106716 |
| 65 | 6 | 0 | -0.071109 | -2.529003 | 5.641874  | 134 | 1  | 0 | -6.103851 | -2.053731 | -3.675774 |
| 66 | 1 | 0 | 0.452382  | -0.508225 | 5.098387  | 135 | 1  | 0 | 6.528471  | -3.247686 | 0.288646  |
| 67 | 1 | 0 | -0.563742 | -4.617940 | 5.865855  |     |    |   |           |           |           |
| 68 | 1 | 0 | -0.208261 | -2.297642 | 6.694850  |     |    |   |           |           |           |
| 69 | 1 | 0 | 0.322444  | -4.575220 | 1.367604  |     |    |   |           |           |           |
| 70 | 6 | 0 | 1.855210  | -3.149729 | 0.839631  |     |    |   |           |           |           |
| 71 | 1 | 0 | 2.637873  | -3.833448 | 1.180757  |     |    |   |           |           |           |
| 72 | 1 | 0 | 2.156557  | -2.139550 | 1.129653  |     |    |   |           |           |           |
| 73 | 6 | 0 | 3.458312  | 0.430830  | -3.188509 |     |    |   |           |           |           |
| 74 | 6 | 0 | 4.584844  | 0.975001  | -4.092269 |     |    |   |           |           |           |
| 75 | 6 | 0 | 2.647359  | -0.634058 | -3.950676 |     |    |   |           |           |           |
| 76 | 1 | 0 | 2.770788  | 1.252584  | -2.971548 |     |    |   |           |           |           |
| 77 | 1 | 0 | 5.291175  | 0.180799  | -4.363167 |     |    |   |           |           |           |
| 78 | 1 | 0 | 5.156947  | 1.771089  | -3.604308 |     |    |   |           |           |           |
| 79 | 1 | 0 | 1.811969  | -0.994281 | -3.347925 |     |    |   |           |           |           |
| 80 | 1 | 0 | 3.266100  | -1.489412 | -4.247901 |     |    |   |           |           |           |
| 81 | 6 | 0 | 4.351152  | 0.857239  | 1.881807  |     |    |   |           |           |           |
| 82 | 6 | 0 | 4.198603  | -0.045658 | 3.117867  |     |    |   |           |           |           |
| 83 | 6 | 0 | 5.587285  | 1.768988  | 2.033317  |     |    |   |           |           |           |
| 84 | 1 | 0 | 3.471497  | 1.505429  | 1.858955  |     |    |   |           |           |           |
| 85 | 1 | 0 | 5.091888  | -0.653471 | 3.303130  |     |    |   |           |           |           |
| 86 | 1 | 0 | 3.342748  | -0.722364 | 3.024825  |     |    |   |           |           |           |
| 87 | 1 | 0 | 5.666704  | 2.474691  | 1.199740  |     |    |   |           |           |           |
| 88 | 1 | 0 | 6.508733  | 1.174599  | 2.060568  |     |    |   |           |           |           |
| 89 | 6 | 0 | -3.768534 | 2.050047  | -2.450226 |     |    |   |           |           |           |
| 90 | 6 | 0 | -2.773774 | 1.743178  | -3.586221 |     |    |   |           |           |           |
| 91 | 6 | 0 | -5.000818 | 2.810851  | -2.980487 |     |    |   |           |           |           |
| 92 | 1 | 0 | -3.263467 | 2.723285  | -1.754539 |     |    |   |           |           |           |
| 93 | 1 | 0 | -3.227939 | 1.113139  | -4.360628 |     |    |   |           |           |           |
| 94 | 1 | 0 | -1.886308 | 1.230704  | -3.204159 |     |    |   |           |           |           |

TS-2nd-(S)-reaction pathway: S-re/(S)-1ea (Oxa-SPISLIOL)

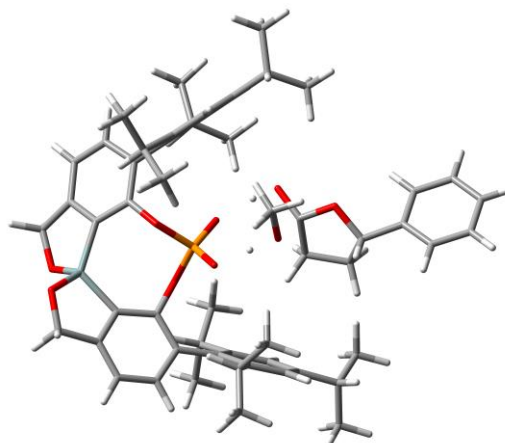

B3LYP/6-31G(d); E(RB3LYP) = -3445.50002732 Hartree

Zero-point correction= 1.141781 Hartree  
Thermal correction to Energy= 1.208492 Hartree  
Thermal correction to Enthalpy= 1.209436 Hartree  
Thermal correction to Gibbs Free Energy= 1.036981 Hartree  
Sum of electronic and zero-point Energies= -3444.358246 Hartree  
Sum of electronic and thermal Energies= -3444.291535 Hartree  
Sum of electronic and thermal Enthalpies= -3444.290591 Hartree

| Sum of electronic and thermal Free Energies= |               |             | -3444.463046 Hartree    |           |           | 64  | 1  | 0 | -3.209529 | -4.330145 | -1.310015 |
|----------------------------------------------|---------------|-------------|-------------------------|-----------|-----------|-----|----|---|-----------|-----------|-----------|
| The number of Imaginary frequencies = 1      |               |             |                         |           |           | 65  | 6  | 0 | 2.063930  | 3.463517  | 0.273955  |
| Center Number                                | Atomic Number | Atomic Type | Coordinates (Angstroms) |           |           |     |    |   |           |           |           |
|                                              |               |             | X                       | Y         | Z         |     |    |   |           |           |           |
| 1                                            | 6             | 0           | -2.585444               | 1.064566  | -0.114366 | 66  | 6  | 0 | 1.232011  | 3.921580  | 1.330093  |
| 2                                            | 8             | 0           | -3.777734               | 1.626586  | -0.419079 | 67  | 6  | 0 | 1.823578  | 3.908331  | -1.048714 |
| 3                                            | 8             | 0           | -1.970568               | 0.638378  | -1.662081 | 68  | 6  | 0 | 0.175561  | 4.787038  | 1.030069  |
| 4                                            | 6             | 0           | -4.771526               | 0.571319  | -0.570017 | 69  | 6  | 0 | 0.740606  | 4.763741  | -1.289210 |
| 5                                            | 6             | 0           | -4.328337               | -0.476940 | 0.471466  | 70  | 6  | 0 | -0.102597 | 5.210843  | -0.271232 |
| 6                                            | 6             | 0           | -2.795777               | -0.320442 | 0.513309  | 71  | 1  | 0 | -0.459166 | 5.130989  | 1.842092  |
| 7                                            | 1             | 0           | -4.667326               | 0.162363  | -1.582257 | 72  | 1  | 0 | 0.558440  | 5.108674  | -2.305335 |
| 8                                            | 1             | 0           | -4.774680               | -0.233849 | 1.440779  | 73  | 6  | 0 | -0.908455 | -3.778975 | -2.555879 |
| 9                                            | 1             | 0           | -4.648558               | -1.483520 | 0.192458  | 74  | 6  | 0 | -1.056882 | -5.118371 | -3.308001 |
| 10                                           | 1             | 0           | -2.389602               | -0.318324 | 1.526780  | 75  | 6  | 0 | -1.863684 | -2.735674 | -3.165223 |
| 11                                           | 1             | 0           | -2.278440               | -1.099487 | -0.047695 | 76  | 1  | 0 | 0.106434  | -3.408345 | -2.720087 |
| 12                                           | 8             | 0           | -1.747549               | 1.945487  | 0.390227  | 77  | 1  | 0 | -2.073990 | -5.516032 | -3.206397 |
| 13                                           | 6             | 0           | -1.774440               | 1.773384  | -2.532524 | 78  | 1  | 0 | -0.368642 | -5.882064 | -2.930900 |
| 14                                           | 1             | 0           | -1.142908               | 2.524023  | -2.050552 | 79  | 1  | 0 | -1.766733 | -1.769455 | -2.666252 |
| 15                                           | 1             | 0           | -1.298718               | 1.402862  | -3.442733 | 80  | 1  | 0 | -2.911775 | -3.053099 | -3.103604 |
| 16                                           | 1             | 0           | -2.754730               | 2.193161  | -2.760651 | 81  | 6  | 0 | 0.761207  | -4.060445 | 2.348423  |
| 17                                           | 1             | 0           | -0.896608               | 1.478615  | 0.698816  | 82  | 6  | 0 | 0.499641  | -2.965919 | 3.401030  |
| 18                                           | 1             | 0           | -1.014057               | 0.141630  | -1.511547 | 83  | 6  | 0 | 0.922574  | -5.443578 | 3.010893  |
| 19                                           | 6             | 0           | 3.494308                | -2.483913 | -0.591706 | 84  | 1  | 0 | 1.717365  | -3.827813 | 1.875337  |
| 20                                           | 6             | 0           | 2.155301                | -2.569954 | -0.215128 | 85  | 1  | 0 | -0.425813 | -3.155489 | 3.958790  |
| 21                                           | 6             | 0           | 1.979318                | -4.645684 | -1.390357 | 86  | 1  | 0 | 0.424517  | -1.980475 | 2.932247  |
| 22                                           | 6             | 0           | 3.263145                | -4.494501 | -1.914063 | 87  | 1  | 0 | 1.146983  | -6.216665 | 2.267272  |
| 23                                           | 6             | 0           | 4.017192                | -3.388896 | -1.524495 | 88  | 1  | 0 | 0.013678  | -5.747079 | 3.543892  |
| 24                                           | 1             | 0           | 1.402576                | -5.526739 | -1.653766 | 89  | 6  | 0 | 2.737517  | 3.551511  | -2.222294 |
| 25                                           | 1             | 0           | 3.654813                | -5.229415 | -2.613520 | 90  | 6  | 0 | 1.990662  | 2.825147  | -3.356423 |
| 26                                           | 6             | 0           | 5.369206                | -2.963830 | -2.080601 | 91  | 6  | 0 | 3.465268  | 4.803526  | -2.753083 |
| 27                                           | 1             | 0           | 6.165139                | -3.676990 | -1.823774 | 92  | 1  | 0 | 3.509946  | 2.868447  | -1.860744 |
| 28                                           | 1             | 0           | 5.323195                | -2.897815 | -3.174773 | 93  | 1  | 0 | 1.213125  | 3.459630  | -3.800000 |
| 29                                           | 6             | 0           | 6.324206                | -0.257336 | 1.679006  | 94  | 1  | 0 | 1.524587  | 1.905746  | -2.990018 |
| 30                                           | 1             | 0           | 7.359210                | -0.065634 | 1.362197  | 95  | 1  | 0 | 4.033355  | 5.298754  | -1.957637 |
| 31                                           | 1             | 0           | 6.324720                | -0.352854 | 2.771928  | 96  | 1  | 0 | 2.760276  | 5.538837  | -3.164255 |
| 32                                           | 6             | 0           | 5.377202                | 0.854055  | 1.250546  | 97  | 6  | 0 | 1.447468  | 3.534710  | 2.796406  |
| 33                                           | 6             | 0           | 4.407664                | 0.431452  | 0.331980  | 98  | 6  | 0 | 1.942354  | 4.744763  | 3.616043  |
| 34                                           | 6             | 0           | 5.337220                | 2.154610  | 1.750597  | 99  | 6  | 0 | 0.194467  | 2.922624  | 3.451367  |
| 35                                           | 1             | 0           | 6.093116                | 2.518048  | 2.442899  | 100 | 1  | 0 | 2.224136  | 2.767216  | 2.837183  |
| 36                                           | 6             | 0           | 3.296734                | 1.232285  | 0.074212  | 101 | 1  | 0 | 1.187113  | 5.539476  | 3.644529  |
| 37                                           | 6             | 0           | 4.289252                | 2.988807  | 1.361701  | 102 | 1  | 0 | 2.856512  | 5.178015  | 3.194498  |
| 38                                           | 1             | 0           | 4.262821                | 4.010931  | 1.727860  | 103 | 1  | 0 | -0.113268 | 2.017476  | 2.923883  |
| 39                                           | 8             | 0           | 1.629688                | -1.533490 | 0.555574  | 104 | 1  | 0 | -0.647910 | 3.624104  | 3.466147  |
| 40                                           | 8             | 0           | 2.283643                | 0.685106  | -0.711553 | 105 | 1  | 0 | 0.414687  | 2.652885  | 4.491731  |
| 41                                           | 15            | 0           | 1.011673                | -0.161378 | -0.100079 | 106 | 1  | 0 | 2.153488  | 4.447908  | 4.650648  |
| 42                                           | 8             | 0           | 0.353551                | 0.564288  | 1.045000  | 107 | 1  | 0 | 2.689323  | 2.554665  | -4.157436 |
| 43                                           | 8             | 0           | 0.187332                | -0.499586 | -1.335857 | 108 | 1  | 0 | 4.165699  | 4.529527  | -3.551378 |
| 44                                           | 6             | 0           | 1.365098                | -3.676261 | -0.570838 | 109 | 1  | 0 | -1.629979 | -2.593581 | -4.227425 |
| 45                                           | 6             | 0           | 3.215828                | 2.548502  | 0.560658  | 110 | 1  | 0 | -0.856964 | -4.982189 | -4.377831 |
| 46                                           | 6             | 0           | -6.153324               | 1.143011  | -0.383753 | 111 | 1  | 0 | 1.743042  | -5.423537 | 3.738221  |
| 47                                           | 6             | 0           | -7.209878               | 0.669907  | -1.168926 | 112 | 1  | 0 | 1.321083  | -2.936351 | 4.127109  |
| 48                                           | 6             | 0           | -6.410310               | 2.108447  | 0.598266  | 113 | 6  | 0 | -4.093236 | -4.867138 | 1.197113  |
| 49                                           | 6             | 0           | -8.508386               | 1.141597  | -0.969484 | 114 | 6  | 0 | -4.594833 | -4.094267 | 2.429164  |
| 50                                           | 1             | 0           | -7.016362               | -0.070637 | -1.942107 | 115 | 1  | 0 | -4.006243 | -4.331822 | 3.322727  |
| 51                                           | 6             | 0           | -7.705247               | 2.588190  | 0.789698  | 116 | 1  | 0 | -4.541522 | -3.011149 | 2.274463  |
| 52                                           | 1             | 0           | -5.589793               | 2.494958  | 1.195284  | 117 | 1  | 0 | -5.637105 | -4.356116 | 2.646129  |
| 53                                           | 6             | 0           | -8.758322               | 2.103036  | 0.010204  | 118 | 6  | 0 | -4.179741 | -6.388194 | 1.438547  |
| 54                                           | 1             | 0           | -9.320340               | 0.764881  | -1.585567 | 119 | 1  | 0 | -5.203983 | -6.685241 | 1.695331  |
| 55                                           | 1             | 0           | -7.892528               | 3.343872  | 1.547831  | 120 | 1  | 0 | -3.873606 | -6.948021 | 0.548243  |
| 56                                           | 1             | 0           | -9.766939               | 2.477627  | 0.162189  | 121 | 1  | 0 | -3.523602 | -6.689544 | 2.263880  |
| 57                                           | 6             | 0           | -0.047942               | -3.881592 | -0.108973 | 122 | 6  | 0 | -1.259534 | 6.153419  | -0.576284 |
| 58                                           | 6             | 0           | -0.321357               | -4.084694 | 1.268312  | 123 | 6  | 0 | -2.600977 | 5.646020  | -0.015512 |
| 59                                           | 6             | 0           | -1.108640               | -3.963293 | -1.048929 | 124 | 1  | 0 | -2.810491 | 4.620707  | -0.336108 |
| 60                                           | 6             | 0           | -1.631385               | -4.371104 | 1.668300  | 125 | 1  | 0 | -2.602590 | 5.653449  | 1.080929  |
| 61                                           | 6             | 0           | -2.399341               | -4.253176 | -0.587716 | 126 | 1  | 0 | -3.422792 | 6.291222  | -0.349201 |
| 62                                           | 6             | 0           | -2.687822               | -4.469666 | 0.761184  | 127 | 6  | 0 | -0.962036 | 7.582649  | -0.081256 |
| 63                                           | 1             | 0           | -1.822781               | -4.540839 | 2.724367  | 128 | 1  | 0 | -1.777559 | 8.265478  | -0.349566 |
|                                              |               |             |                         |           |           | 129 | 1  | 0 | -0.851311 | 7.604740  | 1.009618  |
|                                              |               |             |                         |           |           | 130 | 1  | 0 | -0.034567 | 7.969127  | -0.518091 |
|                                              |               |             |                         |           |           | 131 | 14 | 0 | 4.838673  | -1.286950 | -0.182012 |
|                                              |               |             |                         |           |           | 132 | 8  | 0 | 5.886229  | -1.497752 | 1.114783  |

|     |   |   |           |           |           |
|-----|---|---|-----------|-----------|-----------|
| 133 | 8 | 0 | 5.713718  | -1.674002 | -1.562592 |
| 134 | 1 | 0 | -4.768094 | -4.630856 | 0.361895  |
| 135 | 1 | 0 | -1.355172 | 6.199517  | -1.670345 |

---

Optimized structure of SBIDOL-derived CPA (S)-1fa

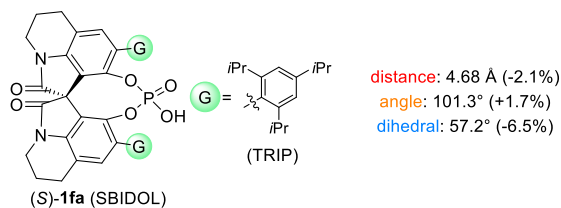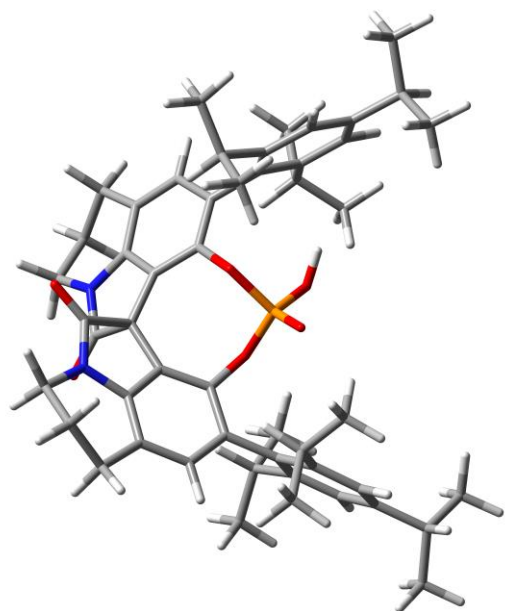

B3LYP/6-31G(d); E(RB3LYP) = -2882.55683454 Hartree  
 Zero-point correction= 1.029830 Hartree  
 Thermal correction to Energy= 1.088754 Hartree  
 Thermal correction to Enthalpy= 1.089698 Hartree  
 Thermal correction to Gibbs Free Energy= 0.936293 Hartree  
 Sum of electronic and zero-point Energies= -2881.527005 Hartree  
 Sum of electronic and thermal Energies= -2881.468080 Hartree  
 Sum of electronic and thermal Enthalpies= -2881.467136 Hartree  
 Sum of electronic and thermal Free Energies= -2881.620542 Hartree  
 The number of Imaginary frequencies = 0

| Center Number | Atomic Number | Atomic Type | Coordinates (Angstroms) |           |           |
|---------------|---------------|-------------|-------------------------|-----------|-----------|
|               |               |             | X                       | Y         | Z         |
| 1             | 1             | 0           | 1.636943                | -2.076821 | -0.604809 |
| 2             | 6             | 0           | -1.262762               | 2.110213  | 0.381577  |
| 3             | 6             | 0           | -1.780930               | 0.860519  | 0.076327  |
| 4             | 6             | 0           | -3.817672               | 1.426234  | 1.233420  |
| 5             | 6             | 0           | -3.270862               | 2.628531  | 1.698016  |
| 6             | 6             | 0           | -1.992640               | 2.922349  | 1.250377  |
| 7             | 1             | 0           | -4.831318               | 1.162288  | 1.521099  |
| 8             | 6             | 0           | 0.006747                | 2.837648  | 0.043290  |
| 9             | 6             | 0           | 1.963299                | 2.951414  | -1.243097 |
| 10            | 6             | 0           | 1.309456                | 2.172711  | -0.287078 |
| 11            | 6             | 0           | 3.223508                | 2.667932  | -1.748803 |
| 12            | 6             | 0           | 1.884744                | 0.963971  | 0.064411  |
| 13            | 6             | 0           | 3.818330                | 1.489959  | -1.281525 |
| 14            | 1             | 0           | 4.808909                | 1.224464  | -1.639409 |
| 15            | 8             | 0           | -0.955528               | -0.054885 | -0.594609 |
| 16            | 8             | 0           | 1.178073                | 0.106613  | 0.904872  |
| 17            | 15            | 0           | 0.055966                | -0.929855 | 0.329043  |
| 18            | 8             | 0           | 0.766951                | -1.720418 | -0.871724 |
| 19            | 8             | 0           | -0.514955               | -1.692801 | 1.450340  |
| 20            | 6             | 0           | -3.095130               | 0.504734  | 0.453480  |
| 21            | 6             | 0           | 3.164102                | 0.596671  | -0.414665 |
| 22            | 6             | 0           | 3.774672                | -0.727468 | -0.053578 |
| 23            | 6             | 0           | 3.997093                | -1.719284 | -1.051466 |

|    |   |   |           |           |           |
|----|---|---|-----------|-----------|-----------|
| 24 | 6 | 0 | 4.132303  | -1.003426 | 1.293139  |
| 25 | 6 | 0 | 4.531378  | -2.957224 | -0.663317 |
| 26 | 6 | 0 | 4.667254  | -2.254551 | 1.613475  |
| 27 | 6 | 0 | 4.867275  | -3.253417 | 0.657617  |
| 28 | 1 | 0 | 4.700796  | -3.716431 | -1.422806 |
| 29 | 1 | 0 | 4.938417  | -2.452268 | 2.647125  |
| 30 | 6 | 0 | -3.727035 | -0.791272 | 0.034825  |
| 31 | 6 | 0 | -4.024899 | -1.015969 | -1.334291 |
| 32 | 6 | 0 | -4.079529 | -1.770410 | 0.997251  |
| 33 | 6 | 0 | -4.653547 | -2.207646 | -1.706530 |
| 34 | 6 | 0 | -4.717137 | -2.939616 | 0.564161  |
| 35 | 6 | 0 | -5.010329 | -3.186317 | -0.776179 |
| 36 | 1 | 0 | -4.879439 | -2.369830 | -2.757646 |
| 37 | 1 | 0 | -4.989450 | -3.691488 | 1.301035  |
| 38 | 6 | 0 | -3.733791 | 0.011961  | -2.429216 |
| 39 | 6 | 0 | -2.783669 | -0.543001 | -3.507722 |
| 40 | 6 | 0 | -5.037732 | 0.542107  | -3.058572 |
| 41 | 1 | 0 | -3.235757 | 0.871885  | -1.974350 |
| 42 | 1 | 0 | -3.233646 | -1.384023 | -4.048737 |
| 43 | 1 | 0 | -1.845449 | -0.888710 | -3.063303 |
| 44 | 1 | 0 | -5.696470 | 0.975632  | -2.297787 |
| 45 | 1 | 0 | -5.593951 | -0.254820 | -3.566207 |
| 46 | 6 | 0 | -3.814922 | -1.609555 | 2.495819  |
| 47 | 6 | 0 | -5.126483 | -1.348842 | 3.265867  |
| 48 | 6 | 0 | -3.073869 | -2.816374 | 3.102936  |
| 49 | 1 | 0 | -3.164808 | -0.741477 | 2.633568  |
| 50 | 1 | 0 | -5.808549 | -2.203686 | 3.182409  |
| 51 | 1 | 0 | -5.658996 | -0.468595 | 2.888146  |
| 52 | 1 | 0 | -2.131805 | -2.991961 | 2.580273  |
| 53 | 1 | 0 | -3.678700 | -3.730382 | 3.065676  |
| 54 | 6 | 0 | 3.742779  | -1.485308 | -2.546267 |
| 55 | 6 | 0 | 5.078931  | -1.271085 | -3.289783 |
| 56 | 6 | 0 | 2.947806  | -2.614594 | -3.232087 |
| 57 | 1 | 0 | 3.151516  | -0.571773 | -2.651432 |
| 58 | 1 | 0 | 5.696364  | -2.176443 | -3.252107 |
| 59 | 1 | 0 | 5.666511  | -0.457052 | -2.852306 |
| 60 | 1 | 0 | 1.969722  | -2.769010 | -2.767915 |
| 61 | 1 | 0 | 3.488209  | -3.567846 | -3.220016 |
| 62 | 6 | 0 | 4.015545  | 0.036577  | 2.408094  |
| 63 | 6 | 0 | 3.168246  | -0.460241 | 3.594665  |
| 64 | 6 | 0 | 5.413522  | 0.490343  | 2.876320  |
| 65 | 1 | 0 | 3.517358  | 0.920608  | 2.003279  |
| 66 | 1 | 0 | 3.640081  | -1.308515 | 4.104921  |
| 67 | 1 | 0 | 2.171269  | -0.769631 | 3.267940  |
| 68 | 1 | 0 | 6.001834  | 0.890799  | 2.043048  |
| 69 | 1 | 0 | 5.978967  | -0.339924 | 3.316103  |
| 70 | 1 | 0 | 3.052179  | 0.341666  | 4.333427  |
| 71 | 1 | 0 | 5.324447  | 1.274760  | 3.637223  |
| 72 | 1 | 0 | 2.774664  | -2.354906 | -4.282974 |
| 73 | 1 | 0 | 4.898045  | -1.032356 | -4.344797 |
| 74 | 1 | 0 | -2.848523 | -2.618753 | 4.158345  |
| 75 | 1 | 0 | -4.921032 | -1.189405 | 4.331650  |
| 76 | 1 | 0 | -4.816693 | 1.319788  | -3.799739 |
| 77 | 1 | 0 | -2.549096 | 0.235329  | -4.244389 |
| 78 | 6 | 0 | -5.696142 | -4.478704 | -1.199300 |
| 79 | 6 | 0 | -7.069865 | -4.217194 | -1.845321 |
| 80 | 1 | 0 | -6.970124 | -3.646515 | -2.776318 |
| 81 | 1 | 0 | -7.570725 | -5.162589 | -2.086972 |
| 82 | 1 | 0 | -7.721209 | -3.647358 | -1.173543 |
| 83 | 6 | 0 | -4.802172 | -5.324517 | -2.125759 |
| 84 | 1 | 0 | -5.288657 | -6.276705 | -2.370320 |
| 85 | 1 | 0 | -4.599664 | -4.802078 | -3.068337 |
| 86 | 1 | 0 | -3.838690 | -5.543454 | -1.652941 |
| 87 | 6 | 0 | 5.438308  | -4.614710 | 1.031377  |
| 88 | 6 | 0 | 6.865418  | -4.501722 | 1.600293  |
| 89 | 1 | 0 | 6.876587  | -3.937068 | 2.540057  |
| 90 | 1 | 0 | 7.277879  | -5.496615 | 1.805836  |
| 91 | 1 | 0 | 7.534199  | -3.993216 | 0.897230  |
| 92 | 6 | 0 | 4.514263  | -5.375158 | 2.001517  |



|     |   |   |           |           |           |     |   |   |           |           |           |
|-----|---|---|-----------|-----------|-----------|-----|---|---|-----------|-----------|-----------|
| 93  | 1 | 0 | 4.914223  | -6.374337 | 2.211077  | 109 | 1 | 0 | -2.136738 | 5.821931  | 2.134792  |
| 94  | 1 | 0 | 4.419163  | -4.847059 | 2.957553  | 110 | 1 | 0 | -0.894439 | 5.296488  | 3.281591  |
| 95  | 1 | 0 | 3.508261  | -5.490882 | 1.583923  | 111 | 6 | 0 | 3.781254  | 3.603957  | -2.799739 |
| 96  | 6 | 0 | -0.134558 | 3.867652  | -1.168596 | 112 | 6 | 0 | 2.631016  | 4.206711  | -3.638672 |
| 97  | 6 | 0 | 0.065985  | 3.931206  | 1.200986  | 113 | 1 | 0 | 4.482779  | 3.074651  | -3.454284 |
| 98  | 8 | 0 | 1.005236  | 4.638297  | 1.498948  | 114 | 1 | 0 | 4.350324  | 4.416069  | -2.324128 |
| 99  | 8 | 0 | -1.113699 | 4.510383  | -1.480038 | 115 | 6 | 0 | 1.556335  | 4.879190  | -2.766836 |
| 100 | 7 | 0 | -1.216500 | 3.996130  | 1.695239  | 116 | 1 | 0 | 3.024016  | 4.949159  | -4.341595 |
| 101 | 7 | 0 | 1.128986  | 3.967593  | -1.709307 | 117 | 1 | 0 | 2.164545  | 3.411315  | -4.232770 |
| 102 | 6 | 0 | -3.912397 | 3.598690  | 2.667102  | 118 | 1 | 0 | 0.673711  | 5.153525  | -3.350528 |
| 103 | 6 | 0 | -2.828056 | 4.290332  | 3.524769  | 119 | 1 | 0 | 1.952257  | 5.794817  | -2.307654 |
| 104 | 1 | 0 | -4.625443 | 3.078811  | 3.316622  | 120 | 1 | 0 | -5.869387 | -5.064655 | -0.286132 |
| 105 | 1 | 0 | -4.486654 | 4.360661  | 2.119960  | 121 | 1 | 0 | 5.499442  | -5.203146 | 0.105557  |
| 106 | 6 | 0 | -1.732790 | 4.952204  | 2.670251  |     |   |   |           |           |           |
| 107 | 1 | 0 | -3.281718 | 5.056427  | 4.162886  |     |   |   |           |           |           |
| 108 | 1 | 0 | -2.365912 | 3.547706  | 4.186615  |     |   |   |           |           |           |

#### DFT calculation for all conformations of real system using SBIDOL-derived CPA (S)-1fa

| TS            | Orientation I | Orientation II | $\Delta\Delta G^\ddagger$ (a.u.) | $\Delta\Delta G^\ddagger$ (kcal/mmol) |
|---------------|---------------|----------------|----------------------------------|---------------------------------------|
| <i>R-anti</i> | up            | up             | -3534.687278                     | -2.84                                 |
|               | up            | down           |                                  |                                       |
|               | down          | up             | -3534.687176                     | -2.77                                 |
|               | down          | down           |                                  |                                       |
| <i>S-anti</i> | up            | up             | -3534.681598                     | 0.73                                  |
|               | up            | down           | -3534.681219                     | 0.97                                  |
|               | down          | up             | -3534.679384                     | 2.12                                  |
|               | down          | down           | -3534.679369                     | 2.13                                  |
| <i>S-syn</i>  | up            | up             | -3534.680196                     | 1.61                                  |
|               | up            | down           | -3534.680501                     | 1.42                                  |
|               | down          | down           | -3534.679993                     | 1.73                                  |
|               | down          | up             | -3534.680469                     | 1.44                                  |

| TS          | Orientation I | Orientation II | $\Delta\Delta G^\ddagger$ (a.u.) | $\Delta\Delta G^\ddagger$ (kcal/mmol) |
|-------------|---------------|----------------|----------------------------------|---------------------------------------|
| <i>R-re</i> | up            | up             | -3534.682597                     | 0.10                                  |
|             | up            | down           | -3534.682757                     | 0.00                                  |
|             | down          | up             | -3534.682026                     | 0.46                                  |
|             | down          | down           | -3534.682257                     | 0.31                                  |
| <i>S-si</i> | up            | up             | -3534.682354                     | 0.25                                  |
|             | up            | down           |                                  |                                       |
|             | down          | up             |                                  |                                       |
|             | down          | down           |                                  |                                       |
| <i>S-re</i> | up            | up             | -3534.683429                     | -0.42                                 |
|             | up            | down           |                                  |                                       |
|             | down          | up             |                                  |                                       |
|             | down          | down           |                                  |                                       |

\* Assignments of "up" and "down" are shown in ESI page S55.

#### DFT calculation of real system using SBIDOL-derived CPA (S)-1fa

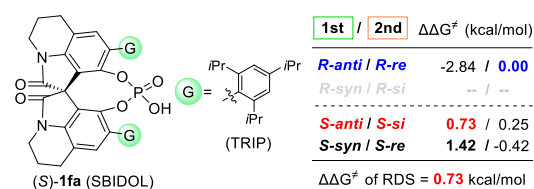

#### TS-1st-(R)-reaction pathway: *R-anti*/(S)-1fa (SBIDOL)

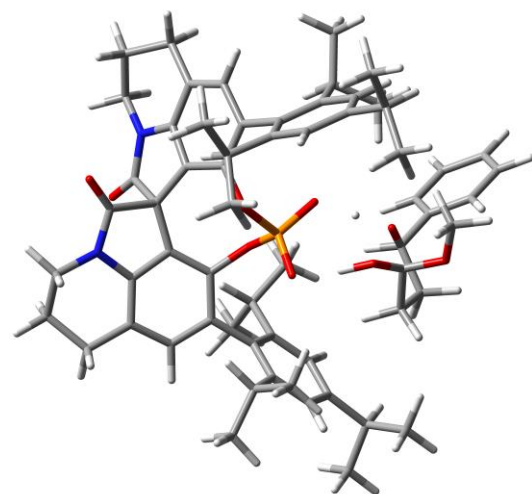

B3LYP/6-31G(d); E(RB3LYP) = -3535.83963680 Hartree

Zero-point correction= 1.263229 Hartree  
 Thermal correction to Energy= 1.335446 Hartree  
 Thermal correction to Enthalpy= 1.336390 Hartree  
 Thermal correction to Gibbs Free Energy= 1.152359 Hartree  
 Sum of electronic and zero-point Energies= -3534.576408 Hartree  
 Sum of electronic and thermal Energies= -3534.504191 Hartree  
 Sum of electronic and thermal Enthalpies= -3534.503247 Hartree  
 Sum of electronic and thermal Free Energies= -3534.687278 Hartree  
 The number of Imaginary frequencies = 1

| Center Number | Atomic Number | Atomic Type | Coordinates (Angstroms) |           |           |
|---------------|---------------|-------------|-------------------------|-----------|-----------|
|               |               |             | X                       | Y         | Z         |
| 1             | 6             | 0           | 0.444499                | -3.805891 | -1.336587 |
| 2             | 8             | 0           | -0.011625               | -3.401012 | 0.248866  |
| 3             | 6             | 0           | 1.113066                | -3.640852 | 1.150808  |
| 4             | 6             | 0           | 2.192189                | -4.309267 | 0.273235  |
| 5             | 6             | 0           | 1.949513                | -3.756868 | -1.131106 |
| 6             | 1             | 0           | 1.466003                | -2.656196 | 1.474819  |
| 7             | 1             | 0           | 2.071404                | -5.396345 | 0.283312  |
| 8             | 1             | 0           | 3.190704                | -4.072614 | 0.649719  |
| 9             | 1             | 0           | 2.437773                | -4.343513 | -1.914193 |
| 10            | 1             | 0           | 2.280954                | -2.717764 | -1.213810 |
| 11            | 8             | 0           | -0.167630               | -2.946027 | -2.138295 |
| 12            | 8             | 0           | 0.010823                | -5.076043 | -1.480782 |
| 13            | 6             | 0           | -1.387418               | -5.247488 | -1.777984 |
| 14            | 1             | 0           | -1.558094               | -6.324064 | -1.738572 |
| 15            | 1             | 0           | -1.618430               | -4.862206 | -2.773354 |
| 16            | 1             | 0           | -2.002320               | -4.737670 | -1.031361 |
| 17            | 1             | 0           | -0.327851               | -2.310299 | 0.358699  |
| 18            | 1             | 0           | 0.186897                | -2.002073 | -2.028381 |
| 19            | 6             | 0           | 0.998188                | 3.163355  | 0.080986  |
| 20            | 6             | 0           | 1.664856                | 1.948175  | 0.066736  |
| 21            | 6             | 0           | 3.555440                | 3.025897  | -0.985759 |

|    |    |   |           |           |           |     |   |   |           |           |           |
|----|----|---|-----------|-----------|-----------|-----|---|---|-----------|-----------|-----------|
| 22 | 6  | 0 | 2.850426  | 4.226321  | -1.134258 | 91  | 6 | 0 | -2.969115 | 1.229753  | -3.715822 |
| 23 | 6  | 0 | 1.573475  | 4.237843  | -0.598210 | 92  | 6 | 0 | -5.232704 | 2.118107  | -2.974111 |
| 24 | 1  | 0 | 4.580015  | 2.969164  | -1.343112 | 93  | 1 | 0 | -3.429171 | 2.149085  | -1.844893 |
| 25 | 6  | 0 | -0.323132 | 3.619534  | 0.623755  | 94  | 1 | 0 | -3.413923 | 0.572632  | -4.472966 |
| 26 | 6  | 0 | -2.262952 | 3.223194  | 1.863598  | 95  | 1 | 0 | -2.025105 | 0.784324  | -3.388802 |
| 27 | 6  | 0 | -1.534376 | 2.748357  | 0.773219  | 96  | 1 | 0 | -5.892534 | 2.311076  | -2.120765 |
| 28 | 6  | 0 | -3.518618 | 2.761363  | 2.218984  | 97  | 1 | 0 | -5.782954 | 1.492019  | -3.686639 |
| 29 | 6  | 0 | -2.001266 | 1.621661  | 0.116370  | 98  | 1 | 0 | 4.708107  | 1.463705  | -4.693966 |
| 30 | 6  | 0 | -4.033524 | 1.735292  | 1.415923  | 99  | 1 | 0 | 2.870706  | -0.239108 | -4.798756 |
| 31 | 1  | 0 | -5.039428 | 1.372911  | 1.606949  | 100 | 1 | 0 | 4.880029  | 1.830422  | 3.818316  |
| 32 | 8  | 0 | 1.014467  | 0.828290  | 0.574955  | 101 | 1 | 0 | 2.847525  | 0.336572  | 4.069919  |
| 33 | 8  | 0 | -1.179774 | 1.014042  | -0.830086 | 102 | 1 | 0 | -2.998264 | -2.929579 | 3.054102  |
| 34 | 15 | 0 | -0.014658 | -0.039588 | -0.367313 | 103 | 1 | 0 | -5.089477 | -1.617918 | 3.624275  |
| 35 | 8  | 0 | -0.588697 | -1.074131 | 0.599632  | 104 | 1 | 0 | -2.746197 | 2.187722  | -4.201561 |
| 36 | 8  | 0 | 0.646261  | -0.529857 | -1.627117 | 105 | 1 | 0 | -5.022913 | 3.076442  | -3.464407 |
| 37 | 6  | 0 | 2.985937  | 1.863150  | -0.435509 | 106 | 6 | 0 | -5.858510 | -3.214798 | -2.614656 |
| 38 | 6  | 0 | -3.294184 | 1.114416  | 0.392910  | 107 | 6 | 0 | -5.012253 | -3.715919 | -3.799658 |
| 39 | 6  | 0 | 0.678608  | -4.445608 | 2.353226  | 108 | 1 | 0 | -4.019897 | -4.041011 | -3.467713 |
| 40 | 6  | 0 | 0.967430  | -3.988753 | 3.642638  | 109 | 1 | 0 | -5.502726 | -4.561824 | -4.296614 |
| 41 | 6  | 0 | 0.007792  | -5.666409 | 2.196291  | 110 | 1 | 0 | -4.867962 | -2.928586 | -4.548655 |
| 42 | 6  | 0 | 0.603912  | -4.742804 | 4.760850  | 111 | 6 | 0 | -7.265110 | -2.794799 | -3.082935 |
| 43 | 1  | 0 | 1.476147  | -3.036491 | 3.773580  | 112 | 1 | 0 | -7.884614 | -2.477518 | -2.237004 |
| 44 | 6  | 0 | -0.362984 | -6.415166 | 3.311146  | 113 | 1 | 0 | -7.213730 | -1.958561 | -3.790270 |
| 45 | 1  | 0 | -0.227775 | -6.020126 | 1.196345  | 114 | 1 | 0 | -7.772489 | -3.627158 | -3.585930 |
| 46 | 6  | 0 | -0.062829 | -5.956648 | 4.597241  | 115 | 6 | 0 | 6.512928  | -2.809735 | -0.197470 |
| 47 | 1  | 0 | 0.835343  | -4.376244 | 5.757347  | 116 | 6 | 0 | 6.135283  | -4.013074 | -1.078427 |
| 48 | 1  | 0 | -0.887206 | -7.357971 | 3.178421  | 117 | 1 | 0 | 6.142694  | -3.753418 | -2.143379 |
| 49 | 1  | 0 | -0.351584 | -6.542444 | 5.465841  | 118 | 1 | 0 | 6.852145  | -4.830381 | -0.936477 |
| 50 | 6  | 0 | -3.899820 | -0.018496 | -0.384160 | 119 | 1 | 0 | 5.137353  | -4.393124 | -0.834083 |
| 51 | 6  | 0 | -4.245163 | -1.234788 | 0.258705  | 120 | 6 | 0 | 7.935996  | -2.318070 | -0.532966 |
| 52 | 6  | 0 | -4.195600 | 0.148933  | -1.762372 | 121 | 1 | 0 | 8.666192  | -3.128520 | -0.418030 |
| 53 | 6  | 0 | -4.871766 | -2.240120 | -0.488970 | 122 | 1 | 0 | 7.991169  | -1.958266 | -1.567442 |
| 54 | 6  | 0 | -4.814080 | -0.894160 | -2.458156 | 123 | 1 | 0 | 8.233754  | -1.493006 | 0.122999  |
| 55 | 6  | 0 | -5.164569 | -2.098609 | -1.844873 | 124 | 6 | 0 | 3.340052  | 5.475094  | -1.839596 |
| 56 | 1  | 0 | -5.144073 | -3.169719 | 0.005991  | 125 | 6 | 0 | 2.509833  | 6.710118  | -1.424169 |
| 57 | 1  | 0 | -5.040189 | -0.752212 | -3.512106 | 126 | 1 | 0 | 3.273254  | 5.338848  | -2.929109 |
| 58 | 6  | 0 | 3.801560  | 0.603920  | -0.380795 | 127 | 1 | 0 | 4.399855  | 5.651073  | -1.618582 |
| 59 | 6  | 0 | 4.231931  | 0.091230  | 0.868017  | 128 | 6 | 0 | 0.994819  | 6.463077  | -1.525748 |
| 60 | 6  | 0 | 4.224297  | -0.031581 | -1.578426 | 129 | 1 | 0 | 2.750370  | 6.978480  | -0.388368 |
| 61 | 6  | 0 | 5.065880  | -1.033947 | 0.890341  | 130 | 1 | 0 | 2.771029  | 7.568002  | -2.053097 |
| 62 | 6  | 0 | 5.074803  | -1.140599 | -1.494333 | 131 | 1 | 0 | 0.418858  | 7.308385  | -1.139730 |
| 63 | 6  | 0 | 5.514961  | -1.659666 | -0.273910 | 132 | 1 | 0 | 0.697299  | 6.306018  | -2.572257 |
| 64 | 1  | 0 | 5.407458  | -1.415720 | 1.850603  | 133 | 6 | 0 | -4.190935 | 3.384766  | 3.425564  |
| 65 | 1  | 0 | 5.412243  | -1.604138 | -2.417602 | 134 | 6 | 0 | -3.566699 | 4.757930  | 3.761538  |
| 66 | 6  | 0 | 3.820170  | 0.457360  | -2.972138 | 135 | 1 | 0 | -4.094828 | 2.716460  | 4.294092  |
| 67 | 6  | 0 | 5.023032  | 1.068570  | -3.720439 | 136 | 1 | 0 | -5.266975 | 3.502098  | 3.248561  |
| 68 | 6  | 0 | 3.170192  | -0.647899 | -3.825948 | 137 | 6 | 0 | -2.030514 | 4.706670  | 3.835530  |
| 69 | 1  | 0 | 3.068230  | 1.240786  | -2.850332 | 138 | 1 | 0 | -3.853550 | 5.485161  | 2.992435  |
| 70 | 1  | 0 | 5.800689  | 0.316906  | -3.902698 | 139 | 1 | 0 | -3.954338 | 5.123641  | 4.718540  |
| 71 | 1  | 0 | 5.484418  | 1.886740  | -3.156534 | 140 | 1 | 0 | -1.597765 | 5.700478  | 3.978629  |
| 72 | 1  | 0 | 2.276433  | -1.037018 | -3.334341 | 141 | 1 | 0 | -1.704362 | 4.075923  | 4.674761  |
| 73 | 1  | 0 | 3.860182  | -1.478100 | -4.019951 | 142 | 7 | 0 | 0.660008  | 5.284697  | -0.735111 |
| 74 | 6  | 0 | 3.885978  | 0.756525  | 2.201176  | 143 | 7 | 0 | -1.521077 | 4.163861  | 2.582193  |
| 75 | 6  | 0 | 3.094748  | -0.179539 | 3.134303  | 144 | 6 | 0 | -0.573570 | 4.946624  | -0.228286 |
| 76 | 6  | 0 | 5.150568  | 1.294961  | 2.900410  | 145 | 6 | 0 | -0.261278 | 4.324616  | 2.053010  |
| 77 | 1  | 0 | 3.248252  | 1.620245  | 1.999742  | 146 | 8 | 0 | -1.599240 | 5.587107  | -0.319682 |
| 78 | 1  | 0 | 3.673432  | -1.074927 | 3.393972  | 147 | 8 | 0 | 0.653066  | 4.967024  | 2.525083  |
| 79 | 1  | 0 | 2.156746  | -0.492787 | 2.664757  | 148 | 1 | 0 | -5.982617 | -4.056918 | -1.919422 |
| 80 | 1  | 0 | 5.695211  | 1.989236  | 2.250978  | 149 | 1 | 0 | 6.524746  | -3.156494 | 0.845424  |
| 81 | 1  | 0 | 5.837922  | 0.486201  | 3.175783  |     |   |   |           |           |           |
| 82 | 6  | 0 | -3.984814 | -1.502064 | 1.743110  |     |   |   |           |           |           |
| 83 | 6  | 0 | -5.295368 | -1.466665 | 2.557323  |     |   |   |           |           |           |
| 84 | 6  | 0 | -3.258604 | -2.837191 | 1.992893  |     |   |   |           |           |           |
| 85 | 1  | 0 | -3.330812 | -0.710772 | 2.118688  |     |   |   |           |           |           |
| 86 | 1  | 0 | -5.979307 | -2.260792 | 2.233774  |     |   |   |           |           |           |
| 87 | 1  | 0 | -5.825184 | -0.514547 | 2.447119  |     |   |   |           |           |           |
| 88 | 1  | 0 | -2.335908 | -2.903246 | 1.413809  |     |   |   |           |           |           |
| 89 | 1  | 0 | -3.886877 | -3.699361 | 1.738073  |     |   |   |           |           |           |
| 90 | 6  | 0 | -3.919598 | 1.447121  | -2.522988 |     |   |   |           |           |           |

TS-2nd-(R)-reaction pathway: R-re(S)-1fa (SBIDOL)

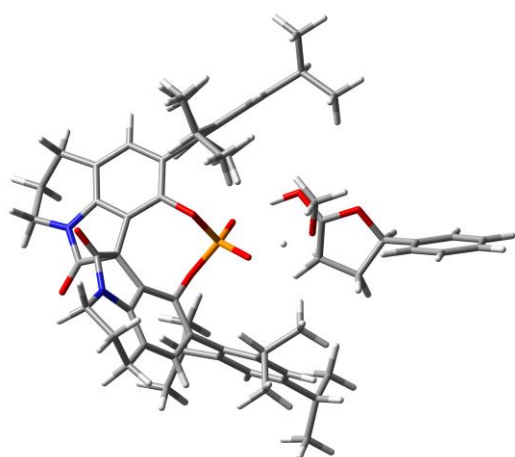

B3LYP/6-31G(d); E(RB3LYP) = -3535.83695266 Hartree  
 Zero-point correction= 1.264440 Hartree  
 Thermal correction to Energy= 1.336548 Hartree  
 Thermal correction to Enthalpy= 1.337492 Hartree  
 Thermal correction to Gibbs Free Energy= 1.154196 Hartree  
 Sum of electronic and zero-point Energies= -3534.572512 Hartree  
 Sum of electronic and thermal Energies= -3534.500405 Hartree  
 Sum of electronic and thermal Enthalpies= -3534.499460 Hartree  
 Sum of electronic and thermal Free Energies= -3534.682757 Hartree  
 The number of Imaginary frequencies = 1

| Center Number | Atomic Number | Atomic Type | Coordinates (Angstroms) |           |           |
|---------------|---------------|-------------|-------------------------|-----------|-----------|
|               |               |             | X                       | Y         | Z         |
| 1             | 6             | 0           | 3.398985                | 1.129833  | -0.598271 |
| 2             | 8             | 0           | 4.646041                | 1.629475  | -0.437000 |
| 3             | 8             | 0           | 2.956781                | 0.655776  | 0.977869  |
| 4             | 6             | 0           | 5.663961                | 0.618371  | -0.750828 |
| 5             | 6             | 0           | 4.876757                | -0.698624 | -0.906630 |
| 6             | 6             | 0           | 3.477978                | -0.218426 | -1.304433 |
| 7             | 1             | 0           | 6.083983                | 0.923671  | -1.716118 |
| 8             | 1             | 0           | 4.840546                | -1.240159 | 0.041876  |
| 9             | 1             | 0           | 5.339279                | -1.351752 | -1.651284 |
| 10            | 1             | 0           | 2.671896                | -0.897915 | -1.027491 |
| 11            | 1             | 0           | 3.402431                | -0.017463 | -2.379011 |
| 12            | 8             | 0           | 2.538864                | 2.065270  | -0.961208 |
| 13            | 6             | 0           | 2.889631                | 1.761751  | 1.906066  |
| 14            | 1             | 0           | 3.889799                | 2.186769  | 1.992918  |
| 15            | 1             | 0           | 2.562990                | 1.354148  | 2.864908  |
| 16            | 1             | 0           | 2.185414                | 2.518871  | 1.553187  |
| 17            | 1             | 0           | 1.961272                | 0.182157  | 0.934179  |
| 18            | 1             | 0           | 1.631725                | 1.650462  | -1.150594 |
| 19            | 6             | 0           | -3.596790               | 0.694595  | 0.039074  |
| 20            | 6             | 0           | -2.467036               | 1.493740  | 0.124054  |
| 21            | 6             | 0           | -3.653749               | 3.260707  | -1.021261 |
| 22            | 6             | 0           | -4.761216               | 2.434888  | -1.246492 |
| 23            | 6             | 0           | -4.676939               | 1.159456  | -0.711492 |
| 24            | 1             | 0           | -3.671605               | 4.279206  | -1.399266 |
| 25            | 6             | 0           | -3.927060               | -0.689756 | 0.510907  |
| 26            | 6             | 0           | -3.404874               | -2.615735 | 1.726039  |
| 27            | 6             | 0           | -2.931081               | -1.795727 | 0.700941  |
| 28            | 6             | 0           | -2.810051               | -3.807693 | 2.105881  |
| 29            | 6             | 0           | -1.698632               | -2.097102 | 0.141819  |
| 30            | 6             | 0           | -1.652657               | -4.158819 | 1.400847  |
| 31            | 1             | 0           | -1.168271               | -5.104842 | 1.624592  |
| 32            | 8             | 0           | -1.329195               | 0.967500  | 0.725274  |
| 33            | 8             | 0           | -1.113351               | -1.182907 | -0.728814 |
| 34            | 15            | 0           | -0.249547               | 0.080914  | -0.141937 |
| 35            | 8             | 0           | 0.745513                | -0.393371 | 0.912977  |

|     |   |   |           |           |           |
|-----|---|---|-----------|-----------|-----------|
| 36  | 8 | 0 | 0.276692  | 0.814321  | -1.345142 |
| 37  | 6 | 0 | -2.483232 | 2.816545  | -0.380132 |
| 38  | 6 | 0 | -1.051595 | -3.319384 | 0.445622  |
| 39  | 6 | 0 | 6.757610  | 0.627756  | 0.289085  |
| 40  | 6 | 0 | 8.072384  | 0.921593  | -0.085296 |
| 41  | 6 | 0 | 6.483852  | 0.330503  | 1.632046  |
| 42  | 6 | 0 | 9.101648  | 0.911521  | 0.858510  |
| 43  | 1 | 0 | 8.293461  | 1.161770  | -1.122884 |
| 44  | 6 | 0 | 7.507852  | 0.328734  | 2.576923  |
| 45  | 1 | 0 | 5.465759  | 0.102497  | 1.934680  |
| 46  | 6 | 0 | 8.820483  | 0.616739  | 2.192112  |
| 47  | 1 | 0 | 10.118662 | 1.139661  | 0.551456  |
| 48  | 1 | 0 | 7.283204  | 0.099715  | 3.615220  |
| 49  | 1 | 0 | 9.618113  | 0.612052  | 2.930032  |
| 50  | 6 | 0 | 0.222206  | -3.742571 | -0.227244 |
| 51  | 6 | 0 | 1.409043  | -3.942598 | 0.524502  |
| 52  | 6 | 0 | 0.229567  | -4.011654 | -1.621206 |
| 53  | 6 | 0 | 2.558121  | -4.401097 | -0.133329 |
| 54  | 6 | 0 | 1.408803  | -4.461969 | -2.223227 |
| 55  | 6 | 0 | 2.586745  | -4.668096 | -1.502165 |
| 56  | 1 | 0 | 3.464752  | -4.564545 | 0.445341  |
| 57  | 1 | 0 | 1.397670  | -4.673914 | -3.289500 |
| 58  | 6 | 0 | -1.293530 | 3.723757  | -0.269598 |
| 59  | 6 | 0 | -0.858924 | 4.173626  | 1.003430  |
| 60  | 6 | 0 | -0.613220 | 4.162835  | -1.434527 |
| 61  | 6 | 0 | 0.256946  | 5.014073  | 1.085744  |
| 62  | 6 | 0 | 0.488608  | 5.014144  | -1.289980 |
| 63  | 6 | 0 | 0.952744  | 5.443922  | -0.047555 |
| 64  | 1 | 0 | 0.579089  | 5.356758  | 2.066414  |
| 65  | 1 | 0 | 1.013454  | 5.348801  | -2.181603 |
| 66  | 6 | 0 | -1.606050 | 3.835804  | 2.295174  |
| 67  | 6 | 0 | -0.716342 | 3.114274  | 3.324424  |
| 68  | 6 | 0 | -2.245238 | 5.099008  | 2.907036  |
| 69  | 1 | 0 | -2.426174 | 3.156604  | 2.050004  |
| 70  | 1 | 0 | 0.119733  | 3.745200  | 3.650952  |
| 71  | 1 | 0 | -0.310492 | 2.187985  | 2.906750  |
| 72  | 1 | 0 | -2.913352 | 5.590325  | 2.190960  |
| 73  | 1 | 0 | -1.485272 | 5.829620  | 3.209008  |
| 74  | 6 | 0 | -1.040011 | 3.779554  | -2.854351 |
| 75  | 6 | 0 | -1.657853 | 4.990195  | -3.585359 |
| 76  | 6 | 0 | 0.104954  | 3.181932  | -3.694231 |
| 77  | 1 | 0 | -1.809091 | 3.006775  | -2.780830 |
| 78  | 1 | 0 | -0.918724 | 5.789175  | -3.720078 |
| 79  | 1 | 0 | -2.501794 | 5.416697  | -3.031467 |
| 80  | 1 | 0 | 0.503116  | 2.283009  | -3.219924 |
| 81  | 1 | 0 | 0.924750  | 3.894750  | -3.841756 |
| 82  | 6 | 0 | 1.494083  | -3.708746 | 2.034956  |
| 83  | 6 | 0 | 1.579835  | -5.044681 | 2.802865  |
| 84  | 6 | 0 | 2.674326  | -2.804866 | 2.438051  |
| 85  | 1 | 0 | 0.582488  | -3.194178 | 2.348641  |
| 86  | 1 | 0 | 2.498819  | -5.586249 | 2.547602  |
| 87  | 1 | 0 | 0.737652  | -5.706331 | 2.574294  |
| 88  | 1 | 0 | 2.632014  | -1.847811 | 1.914657  |
| 89  | 1 | 0 | 3.642919  | -3.274490 | 2.227562  |
| 90  | 6 | 0 | -1.015487 | -3.887239 | -2.501162 |
| 91  | 6 | 0 | -0.816074 | -2.878856 | -3.648765 |
| 92  | 6 | 0 | -1.455590 | -5.263436 | -3.040061 |
| 93  | 1 | 0 | -1.838503 | -3.516229 | -1.886641 |
| 94  | 1 | 0 | -0.036641 | -3.208887 | -4.346524 |
| 95  | 1 | 0 | -0.536292 | -1.894722 | -3.261816 |
| 96  | 1 | 0 | -1.637907 | -5.969467 | -2.222111 |
| 97  | 1 | 0 | -0.695866 | -5.702835 | -3.697562 |
| 98  | 1 | 0 | -1.744955 | -2.769942 | -4.221849 |
| 99  | 1 | 0 | -2.382362 | -5.167747 | -3.618491 |
| 100 | 1 | 0 | 2.639135  | -2.605161 | 3.516239  |
| 101 | 1 | 0 | 1.586923  | -4.867059 | 3.885483  |
| 102 | 1 | 0 | -0.270364 | 2.906059  | -4.687685 |
| 103 | 1 | 0 | -2.017128 | 4.697271  | -4.579696 |
| 104 | 1 | 0 | -2.832177 | 4.839161  | 3.796387  |

|     |   |   |           |           |           |
|-----|---|---|-----------|-----------|-----------|
| 105 | 1 | 0 | -1.300571 | 2.856902  | 4.216344  |
| 106 | 6 | 0 | 2.178328  | 6.342605  | 0.052307  |
| 107 | 6 | 0 | 1.877809  | 7.667418  | 0.776926  |
| 108 | 1 | 0 | 1.595482  | 7.497487  | 1.822784  |
| 109 | 1 | 0 | 2.761074  | 8.317604  | 0.774853  |
| 110 | 1 | 0 | 1.055754  | 8.206688  | 0.293414  |
| 111 | 6 | 0 | 3.364937  | 5.608218  | 0.706018  |
| 112 | 1 | 0 | 4.261878  | 6.239917  | 0.702792  |
| 113 | 1 | 0 | 3.142064  | 5.354618  | 1.750178  |
| 114 | 1 | 0 | 3.594159  | 4.679232  | 0.173614  |
| 115 | 6 | 0 | 3.849813  | -5.200284 | -2.167241 |
| 116 | 6 | 0 | 3.672337  | -6.661487 | -2.624348 |
| 117 | 1 | 0 | 2.893837  | -6.742894 | -3.392196 |
| 118 | 1 | 0 | 4.604780  | -7.052791 | -3.049369 |
| 119 | 1 | 0 | 3.381812  | -7.304477 | -1.786492 |
| 120 | 6 | 0 | 4.318136  | -4.315212 | -3.336677 |
| 121 | 1 | 0 | 5.261834  | -4.689371 | -3.751538 |
| 122 | 1 | 0 | 3.582134  | -4.300726 | -4.148918 |
| 123 | 1 | 0 | 4.474070  | -3.279767 | -3.013143 |
| 124 | 6 | 0 | -4.750674 | -0.765846 | 1.872714  |
| 125 | 6 | 0 | -5.147378 | -1.067397 | -0.448511 |
| 126 | 8 | 0 | -5.648456 | -2.160206 | -0.610630 |
| 127 | 8 | 0 | -5.537936 | 0.047512  | 2.308685  |
| 128 | 7 | 0 | -5.593645 | 0.132707  | -0.951644 |
| 129 | 7 | 0 | -4.483344 | -2.017205 | 2.381369  |
| 130 | 6 | 0 | -5.990806 | 2.772953  | -2.062302 |
| 131 | 6 | 0 | -6.530113 | 1.504041  | -2.761534 |
| 132 | 1 | 0 | -5.758436 | 3.539805  | -2.809874 |
| 133 | 1 | 0 | -6.775226 | 3.194521  | -1.416571 |
| 134 | 6 | 0 | -6.778575 | 0.349082  | -1.775528 |
| 135 | 1 | 0 | -7.468820 | 1.726772  | -3.280590 |
| 136 | 1 | 0 | -5.808091 | 1.178012  | -3.520255 |
| 137 | 1 | 0 | -7.629513 | 0.581059  | -1.120798 |
| 138 | 1 | 0 | -7.003120 | -0.586401 | -2.294841 |
| 139 | 6 | 0 | -3.437409 | -4.567855 | 3.255046  |
| 140 | 6 | 0 | -4.116273 | -3.584116 | 4.235684  |
| 141 | 1 | 0 | -2.682057 | -5.159379 | 3.784811  |
| 142 | 1 | 0 | -4.185030 | -5.281791 | 2.879128  |
| 143 | 6 | 0 | -5.116563 | -2.648239 | 3.534294  |
| 144 | 1 | 0 | -4.646374 | -4.135754 | 5.019823  |
| 145 | 1 | 0 | -3.345140 | -2.978928 | 4.728078  |
| 146 | 1 | 0 | -5.467763 | -1.857010 | 4.202065  |
| 147 | 1 | 0 | -5.995035 | -3.212761 | 3.193279  |
| 148 | 1 | 0 | 2.476147  | 6.591450  | -0.975538 |
| 149 | 1 | 0 | 4.643819  | -5.188657 | -1.407491 |

TS-1st-(S)-reaction pathway: *S-anti*/(*S*)-1fa (SBIDOL)

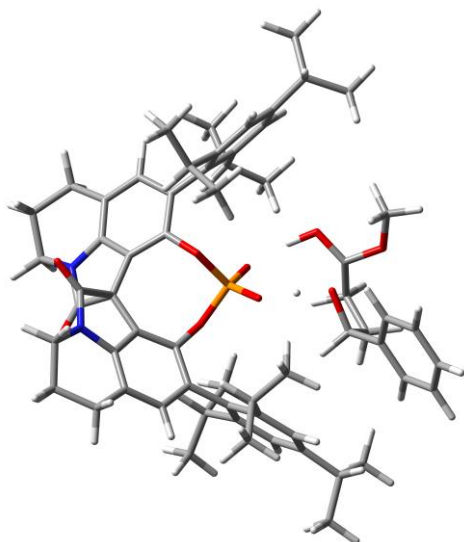

B3LYP/6-31G(d); E(RB3LYP) = -3535.83374456 Hartree  
 Zero-point correction= 1.263191 Hartree  
 Thermal correction to Energy= 1.335448 Hartree  
 Thermal correction to Enthalpy= 1.336393 Hartree  
 Thermal correction to Gibbs Free Energy= 1.152146 Hartree  
 Sum of electronic and zero-point Energies= -3534.570554 Hartree  
 Sum of electronic and thermal Energies= -3534.498296 Hartree  
 Sum of electronic and thermal Enthalpies= -3534.497352 Hartree  
 Sum of electronic and thermal Free Energies= -3534.681598 Hartree  
 The number of Imaginary frequencies = 1

| Center Number | Atomic Number | Atomic Type | Coordinates (Angstroms) |           |           |
|---------------|---------------|-------------|-------------------------|-----------|-----------|
|               |               |             | X                       | Y         | Z         |
| 1             | 6             | 0           | 1.218037                | 3.671545  | -0.976209 |
| 2             | 8             | 0           | 1.959635                | 2.763670  | 0.231546  |
| 3             | 6             | 0           | 3.316980                | 2.465624  | -0.193897 |
| 4             | 6             | 0           | 3.424923                | 2.954034  | -1.666429 |
| 5             | 6             | 0           | 1.982354                | 3.091348  | -2.153578 |
| 6             | 1             | 0           | 3.410990                | 1.374681  | -0.161442 |
| 7             | 1             | 0           | 3.930642                | 3.922239  | -1.704630 |
| 8             | 1             | 0           | 3.993887                | 2.244505  | -2.272365 |
| 9             | 1             | 0           | 1.886808                | 3.760279  | -3.013371 |
| 10            | 1             | 0           | 1.538965                | 2.124773  | -2.407837 |
| 11            | 8             | 0           | -0.086383               | 3.474894  | -0.837777 |
| 12            | 8             | 0           | 1.605720                | 4.940084  | -0.731578 |
| 13            | 6             | 0           | 0.907806                | 5.642741  | 0.308929  |
| 14            | 1             | 0           | 1.423716                | 6.598709  | 0.405785  |
| 15            | 1             | 0           | -0.136993               | 5.797218  | 0.033656  |
| 16            | 1             | 0           | 0.965017                | 5.087782  | 1.249562  |
| 17            | 1             | 0           | 1.387021                | 1.780936  | 0.464924  |
| 18            | 1             | 0           | -0.344616               | 2.539529  | -1.121220 |
| 19            | 6             | 0           | -2.847683               | -1.955377 | -0.115809 |
| 20            | 6             | 0           | -2.701958               | -0.598410 | 0.127653  |
| 21            | 6             | 0           | -4.883938               | -0.227488 | -0.842550 |
| 22            | 6             | 0           | -4.983148               | -1.559198 | -1.260461 |
| 23            | 6             | 0           | -3.931772               | -2.377271 | -0.885711 |
| 24            | 1             | 0           | -5.703261               | 0.452537  | -1.056402 |
| 25            | 6             | 0           | -2.043042               | -3.170945 | 0.227968  |
| 26            | 6             | 0           | -0.294713               | -4.191193 | 1.388512  |
| 27            | 6             | 0           | -0.561479               | -3.193791 | 0.449411  |
| 28            | 6             | 0           | 0.976868                | -4.614123 | 1.736486  |
| 29            | 6             | 0           | 0.500200                | -2.437906 | -0.025882 |
| 30            | 8             | 0           | -1.513932               | -0.150074 | 0.708023  |
| 31            | 8             | 0           | 0.232733                | -1.335428 | -0.831501 |
| 32            | 15            | 0           | -0.208474               | 0.129849  | -0.244927 |
| 33            | 8             | 0           | 0.852506                | 0.657124  | 0.727004  |
| 34            | 8             | 0           | -0.530742               | 0.971249  | -1.450029 |
| 35            | 6             | 0           | -3.748174               | 0.298824  | -0.198163 |
| 36            | 6             | 0           | 1.831014                | -2.820655 | 0.270550  |
| 37            | 6             | 0           | 4.336035                | 3.091688  | 0.741158  |
| 38            | 6             | 0           | 3.967196                | 3.659401  | 1.964715  |
| 39            | 6             | 0           | 5.692933                | 3.074954  | 0.387243  |
| 40            | 6             | 0           | 4.932488                | 4.207821  | 2.812155  |
| 41            | 1             | 0           | 2.921755                | 3.667038  | 2.251789  |
| 42            | 6             | 0           | 6.657547                | 3.618673  | 1.235216  |
| 43            | 1             | 0           | 6.000634                | 2.635244  | -0.558267 |
| 44            | 6             | 0           | 6.279847                | 4.190227  | 2.452067  |
| 45            | 1             | 0           | 4.627315                | 4.647444  | 3.758254  |
| 46            | 1             | 0           | 7.704275                | 3.598194  | 0.943028  |
| 47            | 1             | 0           | 7.029948                | 4.616394  | 3.112794  |
| 48            | 6             | 0           | -3.725309               | 1.763540  | 0.129025  |
| 49            | 6             | 0           | -3.730971               | 2.191410  | 1.480007  |
| 50            | 6             | 0           | -3.819849               | 2.731099  | -0.909049 |
| 51            | 6             | 0           | -3.848759               | 3.558398  | 1.758712  |
| 52            | 6             | 0           | -3.940822               | 4.082063  | -0.566901 |
| 53            | 6             | 0           | -3.972084               | 4.521553  | 0.758685  |
| 54            | 1             | 0           | -3.871975               | 3.881328  | 2.797395  |
| 55            | 1             | 0           | -4.028276               | 4.813338  | -1.366689 |

|     |   |   |           |           |           |     |   |   |           |           |           |
|-----|---|---|-----------|-----------|-----------|-----|---|---|-----------|-----------|-----------|
| 56  | 6 | 0 | 2.025909  | -3.934680 | 1.108739  | 125 | 6 | 0 | -2.570234 | -3.962976 | 1.510415  |
| 57  | 1 | 0 | 3.048016  | -4.246874 | 1.305460  | 126 | 8 | 0 | -2.090557 | -5.295781 | -1.141803 |
| 58  | 6 | 0 | 3.037291  | -2.104137 | -0.259326 | 127 | 8 | 0 | -3.709118 | -4.041139 | 1.919678  |
| 59  | 6 | 0 | 3.952638  | -1.498362 | 0.641617  | 128 | 7 | 0 | -1.474773 | -4.652640 | 1.974229  |
| 60  | 6 | 0 | 3.326874  | -2.111048 | -1.647363 | 129 | 7 | 0 | -3.772471 | -3.706664 | -1.282905 |
| 61  | 6 | 0 | 5.125355  | -0.927436 | 0.130445  | 130 | 6 | 0 | 1.107224  | -5.726393 | 2.757416  |
| 62  | 6 | 0 | 4.516419  | -1.527286 | -2.099206 | 131 | 6 | 0 | -0.209782 | -6.524559 | 2.880618  |
| 63  | 6 | 0 | 5.438811  | -0.939141 | -1.230956 | 132 | 1 | 0 | 1.372524  | -5.304277 | 3.738011  |
| 64  | 1 | 0 | 5.830325  | -0.470040 | 0.821569  | 133 | 1 | 0 | 1.925865  | -6.403570 | 2.485087  |
| 65  | 1 | 0 | 4.736638  | -1.562064 | -3.162777 | 134 | 6 | 0 | -1.434305 | -5.612857 | 3.070344  |
| 66  | 6 | 0 | -3.834700 | 2.368329  | -2.398242 | 135 | 1 | 0 | -0.358634 | -7.122979 | 1.973768  |
| 67  | 6 | 0 | -5.216943 | 2.641901  | -3.027833 | 136 | 1 | 0 | -0.151455 | -7.219232 | 3.725466  |
| 68  | 6 | 0 | -2.743314 | 3.096075  | -3.205969 | 137 | 1 | 0 | -2.368794 | -6.180226 | 3.061172  |
| 69  | 1 | 0 | -3.629839 | 1.298989  | -2.490054 | 138 | 1 | 0 | -1.375743 | -5.080414 | 4.030267  |
| 70  | 1 | 0 | -5.456255 | 3.711955  | -3.007424 | 139 | 6 | 0 | -6.101628 | -2.165386 | -2.083687 |
| 71  | 1 | 0 | -6.021415 | 2.118120  | -2.500285 | 140 | 6 | 0 | -6.111146 | -3.705484 | -1.958847 |
| 72  | 1 | 0 | -1.748345 | 2.857680  | -2.827141 | 141 | 1 | 0 | -5.982200 | -1.884309 | -3.140487 |
| 73  | 1 | 0 | -2.869290 | 4.184851  | -3.180721 | 142 | 1 | 0 | -7.072190 | -1.763229 | -1.768743 |
| 74  | 6 | 0 | -3.680023 | 1.225607  | 2.664644  | 143 | 6 | 0 | -4.723300 | -4.325040 | -2.198722 |
| 75  | 6 | 0 | -2.440673 | 1.465489  | 3.547926  | 144 | 1 | 0 | -6.448236 | -3.986570 | -0.953851 |
| 76  | 6 | 0 | -4.976502 | 1.287515  | 3.497182  | 145 | 1 | 0 | -6.819378 | -4.136866 | -2.674471 |
| 77  | 1 | 0 | -3.607763 | 0.206564  | 2.278772  | 146 | 1 | 0 | -4.722404 | -5.402850 | -2.015233 |
| 78  | 1 | 0 | -2.459244 | 2.461974  | 4.006082  | 147 | 1 | 0 | -4.400675 | -4.162020 | -3.236852 |
| 79  | 1 | 0 | -1.519768 | 1.372923  | 2.964775  | 148 | 1 | 0 | 7.173612  | 0.245020  | -0.916815 |
| 80  | 1 | 0 | -5.855715 | 1.080897  | 2.876681  | 149 | 1 | 0 | -4.157531 | 6.061415  | 2.208895  |
| 81  | 1 | 0 | -5.116766 | 2.272444  | 3.958168  |     |   |   |           |           |           |
| 82  | 6 | 0 | 2.429014  | -2.795613 | -2.679130 |     |   |   |           |           |           |
| 83  | 6 | 0 | 1.906359  | -1.808627 | -3.740170 |     |   |   |           |           |           |
| 84  | 6 | 0 | 3.146753  | -3.990993 | -3.338091 |     |   |   |           |           |           |
| 85  | 1 | 0 | 1.557418  | -3.202293 | -2.161783 |     |   |   |           |           |           |
| 86  | 1 | 0 | 2.725539  | -1.371490 | -4.324433 |     |   |   |           |           |           |
| 87  | 1 | 0 | 1.340368  | -0.995841 | -3.275428 |     |   |   |           |           |           |
| 88  | 1 | 0 | 3.487127  | -4.711997 | -2.586450 |     |   |   |           |           |           |
| 89  | 1 | 0 | 4.022654  | -3.671284 | -3.915229 |     |   |   |           |           |           |
| 90  | 6 | 0 | 3.741257  | -1.462499 | 2.158788  |     |   |   |           |           |           |
| 91  | 6 | 0 | 4.814490  | -2.292643 | 2.892655  |     |   |   |           |           |           |
| 92  | 6 | 0 | 3.693049  | -0.029874 | 2.719847  |     |   |   |           |           |           |
| 93  | 1 | 0 | 2.771270  | -1.913906 | 2.377517  |     |   |   |           |           |           |
| 94  | 1 | 0 | 5.814729  | -1.864710 | 2.755940  |     |   |   |           |           |           |
| 95  | 1 | 0 | 4.848147  | -3.326841 | 2.531355  |     |   |   |           |           |           |
| 96  | 1 | 0 | 2.861508  | 0.527171  | 2.280969  |     |   |   |           |           |           |
| 97  | 1 | 0 | 4.621155  | 0.520853  | 2.531427  |     |   |   |           |           |           |
| 98  | 1 | 0 | 1.240895  | -2.325513 | -4.442178 |     |   |   |           |           |           |
| 99  | 1 | 0 | 2.467757  | -4.511290 | -4.024156 |     |   |   |           |           |           |
| 100 | 1 | 0 | 3.541929  | -0.058852 | 3.806105  |     |   |   |           |           |           |
| 101 | 1 | 0 | 4.608821  | -2.316020 | 3.969747  |     |   |   |           |           |           |
| 102 | 1 | 0 | -5.232250 | 2.318000  | -4.075815 |     |   |   |           |           |           |
| 103 | 1 | 0 | -2.788801 | 2.783778  | -4.256603 |     |   |   |           |           |           |
| 104 | 1 | 0 | -4.947678 | 0.543798  | 4.302656  |     |   |   |           |           |           |
| 105 | 1 | 0 | -2.405721 | 0.729269  | 4.360374  |     |   |   |           |           |           |
| 106 | 6 | 0 | 6.785546  | -0.408723 | -1.710686 |     |   |   |           |           |           |
| 107 | 6 | 0 | 7.790706  | -1.566910 | -1.881501 |     |   |   |           |           |           |
| 108 | 1 | 0 | 7.456930  | -2.259498 | -2.663507 |     |   |   |           |           |           |
| 109 | 1 | 0 | 8.780131  | -1.187326 | -2.164907 |     |   |   |           |           |           |
| 110 | 1 | 0 | 7.895979  | -2.138394 | -0.953140 |     |   |   |           |           |           |
| 111 | 6 | 0 | 6.704930  | 0.426884  | -2.999073 |     |   |   |           |           |           |
| 112 | 1 | 0 | 6.373654  | -0.174236 | -3.853548 |     |   |   |           |           |           |
| 113 | 1 | 0 | 6.009101  | 1.267076  | -2.894291 |     |   |   |           |           |           |
| 114 | 1 | 0 | 7.690689  | 0.834959  | -3.251396 |     |   |   |           |           |           |
| 115 | 6 | 0 | -4.179644 | 5.988915  | 1.112713  |     |   |   |           |           |           |
| 116 | 6 | 0 | -3.057330 | 6.892103  | 0.571103  |     |   |   |           |           |           |
| 117 | 1 | 0 | -3.009648 | 6.858647  | -0.523799 |     |   |   |           |           |           |
| 118 | 1 | 0 | -3.222080 | 7.935725  | 0.865769  |     |   |   |           |           |           |
| 119 | 1 | 0 | -2.081886 | 6.579724  | 0.959095  |     |   |   |           |           |           |
| 120 | 6 | 0 | -5.560385 | 6.491531  | 0.647969  |     |   |   |           |           |           |
| 121 | 1 | 0 | -5.724426 | 7.527828  | 0.967871  |     |   |   |           |           |           |
| 122 | 1 | 0 | -5.646461 | 6.461947  | -0.444760 |     |   |   |           |           |           |
| 123 | 1 | 0 | -6.364920 | 5.874208  | 1.062112  |     |   |   |           |           |           |
| 124 | 6 | 0 | -2.572279 | -4.220999 | -0.852082 |     |   |   |           |           |           |

  

TS-2nd-(S)-reaction pathway: S-si/(S)-1fa (SBIDOL)

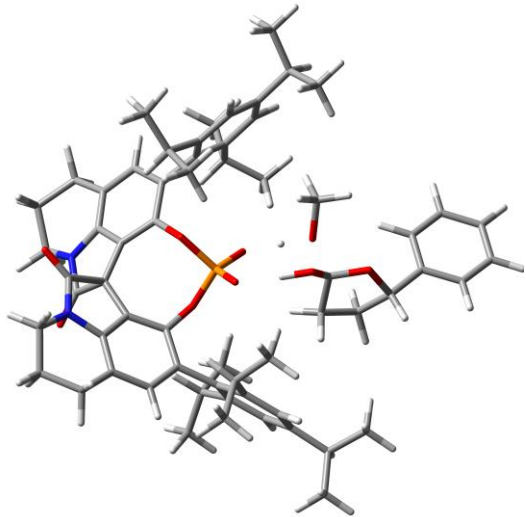

  

|                                                    |        |        |                         |           |           |  |  |  |  |              |         |
|----------------------------------------------------|--------|--------|-------------------------|-----------|-----------|--|--|--|--|--------------|---------|
| B3LYP/6-31G(d); E(RB3LYP) = -3535.83598552 Hartree |        |        |                         |           |           |  |  |  |  |              |         |
| Zero-point correction=                             |        |        |                         |           |           |  |  |  |  | 1.264271     | Hartree |
| Thermal correction to Energy=                      |        |        |                         |           |           |  |  |  |  | 1.336464     | Hartree |
| Thermal correction to Enthalpy=                    |        |        |                         |           |           |  |  |  |  | 1.337408     | Hartree |
| Thermal correction to Gibbs Free Energy=           |        |        |                         |           |           |  |  |  |  | 1.153631     | Hartree |
| Sum of electronic and zero-point Energies=         |        |        |                         |           |           |  |  |  |  | -3534.571714 | Hartree |
| Sum of electronic and thermal Energies=            |        |        |                         |           |           |  |  |  |  | -3534.499521 | Hartree |
| Sum of electronic and thermal Enthalpies=          |        |        |                         |           |           |  |  |  |  | -3534.498577 | Hartree |
| Sum of electronic and thermal Free Energies=       |        |        |                         |           |           |  |  |  |  | -3534.682354 | Hartree |
| The number of Imaginary frequencies = 1            |        |        |                         |           |           |  |  |  |  |              |         |
| -----                                              |        |        |                         |           |           |  |  |  |  |              |         |
| Center                                             | Atomic | Atomic | Coordinates (Angstroms) |           |           |  |  |  |  |              |         |
| Number                                             | Number | Type   | X                       | Y         | Z         |  |  |  |  |              |         |
| -----                                              |        |        |                         |           |           |  |  |  |  |              |         |
| 1                                                  | 6      | 0      | 3.205830                | -1.450507 | -0.108601 |  |  |  |  |              |         |
| 2                                                  | 6      | 0      | 1.912761                | -1.918140 | 0.067029  |  |  |  |  |              |         |
| 3                                                  | 6      | 0      | 2.564747                | -4.007170 | -0.959689 |  |  |  |  |              |         |
| 4                                                  | 6      | 0      | 3.821440                | -3.500477 | -1.311770 |  |  |  |  |              |         |
| 5                                                  | 6      | 0      | 4.086635                | -2.214154 | -0.874685 |  |  |  |  |              |         |
| 6                                                  | 1      | 0      | 2.320068                | -5.032487 | -1.220878 |  |  |  |  |              |         |

|    |    |   |            |           |           |     |   |   |           |           |           |
|----|----|---|------------|-----------|-----------|-----|---|---|-----------|-----------|-----------|
| 7  | 6  | 0 | 3.934838   | -0.210157 | 0.312158  | 76  | 6 | 0 | -1.628047 | 3.435558  | 2.664593  |
| 8  | 6  | 0 | 4.016498   | 1.757266  | 1.570002  | 77  | 1 | 0 | 0.487682  | 3.375887  | 2.453907  |
| 9  | 6  | 0 | 3.294516   | 1.122508  | 0.558976  | 78  | 1 | 0 | -0.827412 | 6.112138  | 2.907156  |
| 10 | 6  | 0 | 3.800372   | 3.062236  | 1.979191  | 79  | 1 | 0 | 0.913359  | 5.833306  | 2.798557  |
| 11 | 6  | 0 | 2.169547   | 1.758332  | 0.055973  | 80  | 1 | 0 | -1.784189 | 2.490693  | 2.138755  |
| 12 | 6  | 0 | 2.752058   | 3.727596  | 1.333827  | 81  | 1 | 0 | -2.490663 | 4.088456  | 2.483062  |
| 13 | 1  | 0 | 2.560020   | 4.768672  | 1.578585  | 82  | 6 | 0 | -0.230615 | -4.085321 | -2.589546 |
| 14 | 8  | 0 | 0.968748   | -1.068776 | 0.638580  | 83  | 6 | 0 | 0.184443  | -5.403635 | -3.276060 |
| 15 | 8  | 0 | 1.352111   | 1.062673  | -0.826128 | 84  | 6 | 0 | -1.376693 | -3.429908 | -3.382965 |
| 16 | 15 | 0 | 0.187620   | 0.026302  | -0.309159 | 85  | 1 | 0 | 0.617246  | -3.397287 | -2.632800 |
| 17 | 8  | 0 | -0.756007  | 0.726912  | 0.665507  | 86  | 1 | 0 | -0.645627 | -6.120623 | -3.285414 |
| 18 | 8  | 0 | -0.387153  | -0.598295 | -1.549107 | 87  | 1 | 0 | 1.027908  | -5.886697 | -2.771772 |
| 19 | 6  | 0 | 1.575077   | -3.238628 | -0.319245 | 88  | 1 | 0 | -1.703068 | -2.499277 | -2.916286 |
| 20 | 6  | 0 | 1.891792   | 3.100839  | 0.412835  | 89  | 1 | 0 | -2.246032 | -4.092688 | -3.472151 |
| 21 | 6  | 0 | 0.236826   | -3.862136 | -0.044371 | 90  | 6 | 0 | 0.672936  | -3.721646 | 2.506262  |
| 22 | 6  | 0 | -0.171802  | -4.107042 | 1.290726  | 91  | 6 | 0 | -0.062309 | -2.737588 | 3.435926  |
| 23 | 6  | 0 | -0.584061  | -4.307057 | -1.116142 | 92  | 6 | 0 | 1.141196  | -4.971125 | 3.279354  |
| 24 | 6  | 0 | -1.374103  | -4.788461 | 1.520387  | 93  | 1 | 0 | 1.575267  | -3.217303 | 2.153984  |
| 25 | 6  | 0 | -1.764875  | -5.000195 | -0.824480 | 94  | 1 | 0 | -0.975888 | -3.179736 | 3.852147  |
| 26 | 6  | 0 | -2.180506  | -5.259786 | 0.484449  | 95  | 1 | 0 | -0.333491 | -1.822079 | 2.901556  |
| 27 | 1  | 0 | -1.677075  | -4.985988 | 2.546607  | 96  | 1 | 0 | 1.695654  | -5.655133 | 2.627231  |
| 28 | 1  | 0 | -2.372940  | -5.357177 | -1.651848 | 97  | 1 | 0 | 0.296454  | -5.525936 | 3.704751  |
| 29 | 6  | 0 | 0.738465   | 3.882868  | -0.143930 | 98  | 1 | 0 | -1.039949 | -3.197609 | -4.400335 |
| 30 | 6  | 0 | -0.263014  | 4.389658  | 0.724996  | 99  | 1 | 0 | 0.474844  | -5.217840 | -4.317376 |
| 31 | 6  | 0 | 0.688659   | 4.205359  | -1.525106 | 100 | 1 | 0 | 1.800672  | -4.681979 | 4.106391  |
| 32 | 6  | 0 | -1.263754  | 5.215922  | 0.195722  | 101 | 1 | 0 | 0.582273  | -2.459433 | 4.278659  |
| 33 | 6  | 0 | -0.346216  | 5.019380  | -1.998340 | 102 | 1 | 0 | -0.016870 | 5.122345  | 4.130815  |
| 34 | 6  | 0 | -1.328860  | 5.548234  | -1.158080 | 103 | 1 | 0 | -1.601805 | 3.221391  | 3.740132  |
| 35 | 1  | 0 | -2.018859  | 5.621432  | 0.866522  | 104 | 1 | 0 | 1.962260  | 2.557442  | -4.329650 |
| 36 | 1  | 0 | -0.366982  | 5.267558  | -3.056624 | 105 | 1 | 0 | 3.338221  | 4.618015  | -3.750552 |
| 37 | 6  | 0 | -3.572528  | -0.375039 | -0.815367 | 106 | 6 | 0 | -3.433644 | -6.074465 | 0.782224  |
| 38 | 8  | 0 | -4.910682  | -0.216674 | -0.967910 | 107 | 6 | 0 | -4.698931 | -5.492255 | 0.126916  |
| 39 | 8  | 0 | -3.088867  | 1.022265  | -0.024743 | 108 | 1 | 0 | -4.625949 | -5.498986 | -0.966846 |
| 40 | 1  | 0 | -1.952954  | -0.495716 | -1.858170 | 109 | 1 | 0 | -5.582175 | -6.080725 | 0.402674  |
| 41 | 6  | 0 | -5.646775  | -0.900786 | 0.099732  | 110 | 1 | 0 | -4.870375 | -4.457128 | 0.444150  |
| 42 | 6  | 0 | -4.565464  | -1.326323 | 1.113534  | 111 | 6 | 0 | -3.244022 | -7.551323 | 0.382526  |
| 43 | 6  | 0 | -3.311818  | -1.441684 | 0.241884  | 112 | 1 | 0 | -4.124463 | -8.145392 | 0.656450  |
| 44 | 1  | 0 | -6.088803  | -1.785970 | -0.372460 | 113 | 1 | 0 | -3.095213 | -7.650685 | -0.699316 |
| 45 | 1  | 0 | -4.435458  | -0.556085 | 1.878580  | 114 | 1 | 0 | -2.370028 | -7.985133 | 0.880106  |
| 46 | 1  | 0 | -4.832405  | -2.260334 | 1.614983  | 115 | 6 | 0 | -2.416066 | 6.477688  | -1.682927 |
| 47 | 1  | 0 | -2.375944  | -1.294923 | 0.780841  | 116 | 6 | 0 | -3.275514 | 5.818849  | -2.777786 |
| 48 | 1  | 0 | -3.257893  | -2.405310 | -0.275476 | 117 | 1 | 0 | -4.075188 | 6.496040  | -3.100919 |
| 49 | 8  | 0 | -2.950932  | -0.374772 | -1.988206 | 118 | 1 | 0 | -2.676321 | 5.568288  | -3.660849 |
| 50 | 6  | 0 | -3.237067  | 2.208326  | -0.840833 | 119 | 1 | 0 | -3.740886 | 4.894006  | -2.418454 |
| 51 | 1  | 0 | -2.906331  | 3.055293  | -0.240295 | 120 | 6 | 0 | -1.826184 | 7.812447  | -2.178613 |
| 52 | 1  | 0 | -2.633197  | 2.129148  | -1.747082 | 121 | 1 | 0 | -2.623682 | 8.495591  | -2.495182 |
| 53 | 1  | 0 | -4.293047  | 2.299749  | -1.097181 | 122 | 1 | 0 | -1.246401 | 8.305123  | -1.390536 |
| 54 | 6  | 0 | -6.750627  | -0.019134 | 0.631046  | 123 | 1 | 0 | -1.159574 | 7.656963  | -3.035119 |
| 55 | 6  | 0 | -6.468200  | 1.232292  | 1.197377  | 124 | 6 | 0 | 5.153793  | -0.192154 | -0.716695 |
| 56 | 6  | 0 | -8.077781  | -0.456221 | 0.580765  | 125 | 6 | 0 | 4.816479  | -0.388029 | 1.631799  |
| 57 | 6  | 0 | -7.496096  | 2.025800  | 1.702437  | 126 | 8 | 0 | 5.369705  | -1.392953 | 2.025656  |
| 58 | 1  | 0 | -5.440697  | 1.582644  | 1.238125  | 127 | 8 | 0 | 5.925131  | 0.717051  | -0.938957 |
| 59 | 6  | 0 | -9.108477  | 0.333769  | 1.094548  | 128 | 7 | 0 | 5.229311  | -1.479189 | -1.196992 |
| 60 | 1  | 0 | -8.307895  | -1.421297 | 0.134804  | 129 | 7 | 0 | 4.925955  | 0.877221  | 2.159641  |
| 61 | 6  | 0 | -8.819290  | 1.577465  | 1.654918  | 130 | 6 | 0 | 4.884750  | -4.210953 | -2.124752 |
| 62 | 1  | 0 | -7.265616  | 2.995219  | 2.136248  | 131 | 6 | 0 | 6.270246  | -3.558577 | -1.917963 |
| 63 | 1  | 0 | -10.134668 | -0.020755 | 1.049978  | 132 | 1 | 0 | 4.621376  | -4.180319 | -3.192362 |
| 64 | 1  | 0 | -9.619191  | 2.196860  | 2.051584  | 133 | 1 | 0 | 4.932083  | -5.272358 | -1.852398 |
| 65 | 1  | 0 | -2.031308  | 0.906273  | 0.275170  | 134 | 6 | 0 | 6.235567  | -2.030614 | -2.096126 |
| 66 | 6  | 0 | 1.756115   | 3.754855  | -2.523454 | 135 | 1 | 0 | 6.629996  | -3.782584 | -0.906484 |
| 67 | 6  | 0 | 1.164462   | 2.896584  | -3.657848 | 136 | 1 | 0 | 6.993927  | -3.980361 | -2.623792 |
| 68 | 6  | 0 | 2.535026   | 4.960581  | -3.087250 | 137 | 1 | 0 | 5.991274  | -1.767347 | -3.135041 |
| 69 | 1  | 0 | 2.482650   | 3.133571  | -1.995665 | 138 | 1 | 0 | 7.197934  | -1.571695 | -1.854044 |
| 70 | 1  | 0 | 0.445158   | 3.463541  | -4.261577 | 139 | 6 | 0 | 4.678941  | 3.621182  | 3.080264  |
| 71 | 1  | 0 | 0.658902   | 2.011838  | -3.259961 | 140 | 6 | 0 | 5.976367  | 2.795522  | 3.228816  |
| 72 | 1  | 0 | 2.988186   | 5.551204  | -2.283132 | 141 | 1 | 0 | 4.131226  | 3.616771  | 4.034306  |
| 73 | 1  | 0 | 1.885943   | 5.627760  | -3.666937 | 142 | 1 | 0 | 4.929552  | 4.669494  | 2.877214  |
| 74 | 6  | 0 | -0.304688  | 4.092846  | 2.227284  | 143 | 6 | 0 | 5.705032  | 1.284113  | 3.322672  |
| 75 | 6  | 0 | -0.040939  | 5.363516  | 3.061037  | 144 | 1 | 0 | 6.625473  | 2.979535  | 2.364243  |

|     |   |   |           |           |           |
|-----|---|---|-----------|-----------|-----------|
| 145 | 1 | 0 | 6.524292  | 3.112709  | 4.122658  |
| 146 | 1 | 0 | 6.632214  | 0.704843  | 3.332248  |
| 147 | 1 | 0 | 5.152847  | 1.046259  | 4.243018  |
| 148 | 1 | 0 | -3.079763 | 6.707156  | -0.837533 |
| 149 | 1 | 0 | -3.584975 | -6.046458 | 1.870241  |

TS-1st-(S)-reaction pathway: S-syn/(S)-1fa (SBIDOL)

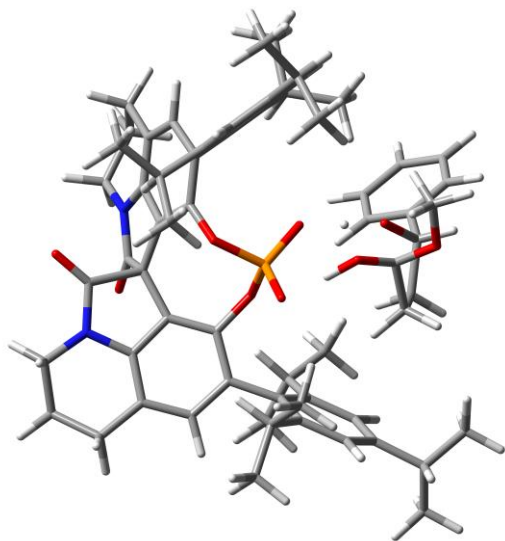

B3LYP/6-31G(d); E(RB3LYP) = -3535.83275672 Hartree  
 Zero-point correction= 1.263335 Hartree  
 Thermal correction to Energy= 1.335622 Hartree  
 Thermal correction to Enthalpy= 1.336567 Hartree  
 Thermal correction to Gibbs Free Energy= 1.152256 Hartree  
 Sum of electronic and zero-point Energies= -3534.569422 Hartree  
 Sum of electronic and thermal Energies= -3534.497134 Hartree  
 Sum of electronic and thermal Enthalpies= -3534.496190 Hartree  
 Sum of electronic and thermal Free Energies= -3534.680501 Hartree  
 The number of Imaginary frequencies = 1

| Center Number | Atomic Number | Atomic Type | Coordinates (Angstroms) |           |           |
|---------------|---------------|-------------|-------------------------|-----------|-----------|
|               |               |             | X                       | Y         | Z         |
| 1             | 6             | 0           | -1.316690               | 2.709810  | 0.660673  |
| 2             | 6             | 0           | -1.897102               | 1.618851  | 0.035141  |
| 3             | 6             | 0           | -3.873477               | 1.926010  | 1.386535  |
| 4             | 6             | 0           | -3.250593               | 2.916492  | 2.156202  |
| 5             | 6             | 0           | -1.972558               | 3.268575  | 1.756800  |
| 6             | 1             | 0           | -4.896595               | 1.647210  | 1.619545  |
| 7             | 6             | 0           | -0.038638               | 3.467498  | 0.465841  |
| 8             | 6             | 0           | 1.839438                | 3.916209  | -0.856086 |
| 9             | 6             | 0           | 1.216240                | 2.900516  | -0.129108 |
| 10            | 6             | 0           | 3.081599                | 3.796410  | -1.455938 |
| 11            | 6             | 0           | 1.786850                | 1.636148  | -0.148381 |
| 12            | 8             | 0           | -1.150016               | 0.922950  | -0.912956 |
| 13            | 8             | 0           | 1.078272                | 0.580324  | 0.419933  |
| 14            | 15            | 0           | -0.069787               | -0.217086 | -0.450963 |
| 15            | 8             | 0           | 0.495377                | -0.811948 | -1.710774 |
| 16            | 8             | 0           | -0.700837               | -1.152317 | 0.578991  |
| 17            | 6             | 0           | -3.223174               | 1.233309  | 0.348435  |
| 18            | 6             | 0           | 3.071050                | 1.442305  | -0.713302 |
| 19            | 6             | 0           | -3.947213               | 0.152486  | -0.400865 |
| 20            | 6             | 0           | -4.231826               | 0.320411  | -1.782030 |
| 21            | 6             | 0           | -4.410968               | -1.010247 | 0.266901  |
| 22            | 6             | 0           | -4.947450               | -0.673382 | -2.456359 |
| 23            | 6             | 0           | -5.134103               | -1.964501 | -0.459762 |
| 24            | 6             | 0           | -5.409863               | -1.826377 | -1.819109 |
| 25            | 1             | 0           | -5.158945               | -0.532922 | -3.513491 |

|    |   |   |           |           |           |
|----|---|---|-----------|-----------|-----------|
| 26 | 1 | 0 | -5.492288 | -2.853897 | 0.053666  |
| 27 | 6 | 0 | 3.697703  | 2.547370  | -1.317738 |
| 28 | 1 | 0 | 4.694862  | 2.403940  | -1.724589 |
| 29 | 6 | 0 | 3.812247  | 0.135773  | -0.666865 |
| 30 | 6 | 0 | 4.069314  | -0.587785 | -1.857284 |
| 31 | 6 | 0 | 4.364356  | -0.314377 | 0.561496  |
| 32 | 6 | 0 | 4.876122  | -1.732653 | -1.788880 |
| 33 | 6 | 0 | 5.158872  | -1.465370 | 0.568622  |
| 34 | 6 | 0 | 5.437079  | -2.187878 | -0.596305 |
| 35 | 1 | 0 | 5.088130  | -2.280707 | -2.704211 |
| 36 | 1 | 0 | 5.596783  | -1.792371 | 1.507567  |
| 37 | 6 | 0 | 0.153760  | -4.022189 | -1.065443 |
| 38 | 8 | 0 | -0.481588 | -3.573251 | 0.415535  |
| 39 | 6 | 0 | 0.480090  | -4.127414 | 1.374728  |
| 40 | 6 | 0 | 1.657535  | -3.911936 | -0.760547 |
| 41 | 1 | 0 | 2.132124  | -4.817411 | -1.146949 |
| 42 | 1 | 0 | 2.070436  | -3.054155 | -1.293221 |
| 43 | 8 | 0 | -0.412682 | -3.238531 | -1.975626 |
| 44 | 8 | 0 | -0.212563 | -5.321817 | -1.179710 |
| 45 | 6 | 0 | -1.579659 | -5.567310 | -1.556801 |
| 46 | 1 | 0 | -1.710575 | -6.647056 | -1.472973 |
| 47 | 1 | 0 | -1.759578 | -5.241753 | -2.583719 |
| 48 | 1 | 0 | -2.262118 | -5.048358 | -0.878130 |
| 49 | 1 | 0 | -0.573454 | -2.435645 | 0.478254  |
| 50 | 1 | 0 | -0.041706 | -2.297178 | -1.951935 |
| 51 | 6 | 0 | 0.214733  | -3.704269 | 2.800038  |
| 52 | 6 | 0 | 0.390448  | -2.384410 | 3.242186  |
| 53 | 6 | 0 | -0.192255 | -4.676997 | 3.722454  |
| 54 | 6 | 0 | 0.161355  | -2.054670 | 4.577721  |
| 55 | 1 | 0 | 0.673135  | -1.606061 | 2.542339  |
| 56 | 6 | 0 | -0.415009 | -4.348330 | 5.060053  |
| 57 | 1 | 0 | -0.333779 | -5.702840 | 3.389820  |
| 58 | 6 | 0 | -0.237890 | -3.033349 | 5.490676  |
| 59 | 1 | 0 | 0.295935  | -1.027221 | 4.904386  |
| 60 | 1 | 0 | -0.727290 | -5.117548 | 5.761206  |
| 61 | 1 | 0 | -0.410812 | -2.771425 | 6.531174  |
| 62 | 1 | 0 | 0.328636  | -5.207702 | 1.299875  |
| 63 | 6 | 0 | 1.839311  | -3.762104 | 0.766379  |
| 64 | 1 | 0 | 2.631966  | -4.402265 | 1.163067  |
| 65 | 1 | 0 | 2.100442  | -2.729485 | 1.014573  |
| 66 | 6 | 0 | 3.550674  | -0.149057 | -3.229259 |
| 67 | 6 | 0 | 4.693680  | 0.422131  | -4.095135 |
| 68 | 6 | 0 | 2.831350  | -1.276011 | -3.993821 |
| 69 | 1 | 0 | 2.815311  | 0.644409  | -3.072822 |
| 70 | 1 | 0 | 5.450159  | -0.344073 | -4.304331 |
| 71 | 1 | 0 | 5.201652  | 1.259979  | -3.605974 |
| 72 | 1 | 0 | 1.982932  | -1.654445 | -3.421100 |
| 73 | 1 | 0 | 3.503386  | -2.110111 | -4.228986 |
| 74 | 6 | 0 | 4.211342  | 0.489733  | 1.854649  |
| 75 | 6 | 0 | 4.012444  | -0.376422 | 3.110213  |
| 76 | 6 | 0 | 5.416287  | 1.436312  | 2.037711  |
| 77 | 1 | 0 | 3.321561  | 1.117327  | 1.763617  |
| 78 | 1 | 0 | 4.907151  | -0.957734 | 3.362286  |
| 79 | 1 | 0 | 3.178034  | -1.075893 | 2.992601  |
| 80 | 1 | 0 | 5.521806  | 2.113179  | 1.183342  |
| 81 | 1 | 0 | 6.349045  | 0.867130  | 2.134451  |
| 82 | 6 | 0 | -3.843158 | 1.572908  | -2.570039 |
| 83 | 6 | 0 | -2.934704 | 1.246837  | -3.770826 |
| 84 | 6 | 0 | -5.093811 | 2.356821  | -3.017070 |
| 85 | 1 | 0 | -3.279637 | 2.237537  | -1.911588 |
| 86 | 1 | 0 | -3.451204 | 0.624876  | -4.511988 |
| 87 | 1 | 0 | -2.033536 | 0.717157  | -3.448799 |
| 88 | 1 | 0 | -5.719857 | 2.626682  | -2.159148 |
| 89 | 1 | 0 | -5.710863 | 1.772227  | -3.709838 |
| 90 | 6 | 0 | -4.172059 | -1.277607 | 1.754823  |
| 91 | 6 | 0 | -5.465009 | -1.088726 | 2.576091  |
| 92 | 6 | 0 | -3.595551 | -2.680628 | 2.023315  |
| 93 | 1 | 0 | -3.432197 | -0.556991 | 2.113024  |
| 94 | 1 | 0 | -6.231631 | -1.810307 | 2.268379  |

|     |   |   |           |           |           |
|-----|---|---|-----------|-----------|-----------|
| 95  | 1 | 0 | -5.892817 | -0.087970 | 2.454527  |
| 96  | 1 | 0 | -2.711489 | -2.871612 | 1.412628  |
| 97  | 1 | 0 | -4.329620 | -3.469469 | 1.817878  |
| 98  | 1 | 0 | 2.447427  | -0.890459 | -4.946070 |
| 99  | 1 | 0 | 4.304470  | 0.777795  | -5.056988 |
| 100 | 1 | 0 | 5.294624  | 2.047159  | 2.940398  |
| 101 | 1 | 0 | 3.794612  | 0.265665  | 3.971653  |
| 102 | 1 | 0 | -2.627733 | 2.171620  | -4.274765 |
| 103 | 1 | 0 | -4.802052 | 3.282028  | -3.528712 |
| 104 | 1 | 0 | -3.306161 | -2.772117 | 3.076924  |
| 105 | 1 | 0 | -5.268568 | -1.245763 | 3.644067  |
| 106 | 6 | 0 | 6.357269  | -3.402651 | -0.583397 |
| 107 | 6 | 0 | 5.837086  | -4.530220 | 0.326707  |
| 108 | 1 | 0 | 6.503327  | -5.400273 | 0.284297  |
| 109 | 1 | 0 | 5.780397  | -4.206624 | 1.372828  |
| 110 | 1 | 0 | 4.836331  | -4.855445 | 0.021151  |
| 111 | 6 | 0 | 7.799169  | -3.013356 | -0.202920 |
| 112 | 1 | 0 | 7.848104  | -2.624069 | 0.820984  |
| 113 | 1 | 0 | 8.464520  | -3.883290 | -0.261745 |
| 114 | 1 | 0 | 8.188637  | -2.238956 | -0.872582 |
| 115 | 6 | 0 | -6.188758 | -2.897877 | -2.570439 |
| 116 | 6 | 0 | -7.517848 | -2.358611 | -3.132119 |
| 117 | 1 | 0 | -7.345289 | -1.574335 | -3.878630 |
| 118 | 1 | 0 | -8.087805 | -3.160283 | -3.617538 |
| 119 | 1 | 0 | -8.138528 | -1.930859 | -2.337182 |
| 120 | 6 | 0 | -5.342776 | -3.545625 | -3.683062 |
| 121 | 1 | 0 | -4.410760 | -3.958254 | -3.280965 |
| 122 | 1 | 0 | -5.896983 | -4.357374 | -4.170134 |
| 123 | 1 | 0 | -5.074460 | -2.814793 | -4.454964 |
| 124 | 7 | 0 | 1.008954  | 5.033131  | -0.964904 |
| 125 | 7 | 0 | -1.127196 | 4.141968  | 2.446006  |
| 126 | 6 | 0 | 0.128134  | 4.179723  | 1.880995  |
| 127 | 6 | 0 | -0.218346 | 4.806164  | -0.389489 |
| 128 | 8 | 0 | -1.190301 | 5.529970  | -0.435290 |
| 129 | 8 | 0 | 1.110682  | 4.742098  | 2.317358  |
| 130 | 6 | 0 | 3.631446  | 4.990499  | -2.209529 |
| 131 | 6 | 0 | 2.928917  | 6.295026  | -1.772560 |
| 132 | 1 | 0 | 3.493295  | 4.844957  | -3.291090 |
| 133 | 1 | 0 | 4.712695  | 5.081154  | -2.049502 |
| 134 | 6 | 0 | 1.395909  | 6.171272  | -1.790300 |
| 135 | 1 | 0 | 3.246251  | 6.556381  | -0.755816 |
| 136 | 1 | 0 | 3.224559  | 7.120210  | -2.429348 |
| 137 | 1 | 0 | 0.911397  | 7.064832  | -1.387769 |
| 138 | 1 | 0 | 1.030908  | 6.027012  | -2.817055 |
| 139 | 6 | 0 | -3.812528 | 3.602854  | 3.383133  |
| 140 | 6 | 0 | -2.668011 | 3.983776  | 4.350742  |
| 141 | 1 | 0 | -4.530737 | 2.952481  | 3.895221  |
| 142 | 1 | 0 | -4.363783 | 4.510155  | 3.095360  |
| 143 | 6 | 0 | -1.564031 | 4.810338  | 3.666920  |
| 144 | 1 | 0 | -3.061782 | 4.560401  | 5.194930  |
| 145 | 1 | 0 | -2.225835 | 3.067450  | 4.761006  |
| 146 | 1 | 0 | -1.938001 | 5.810915  | 3.410571  |
| 147 | 1 | 0 | -0.692532 | 4.936354  | 4.315014  |
| 148 | 1 | 0 | 6.384569  | -3.796062 | -1.608931 |
| 149 | 1 | 0 | -6.435375 | -3.685262 | -1.844452 |

### TS-2nd-(S)-reaction pathway: S-re/(S)-1fa (SBIDOL)

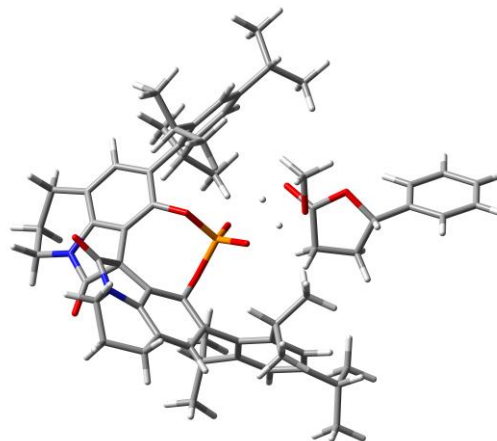

B3LYP/6-31G(d); E(RB3LYP) = -3535.83669684 Hartree

Zero-point correction= 1.264518 Hartree  
 Thermal correction to Energy= 1.336859 Hartree  
 Thermal correction to Enthalpy= 1.337803 Hartree  
 Thermal correction to Gibbs Free Energy= 1.153268 Hartree  
 Sum of electronic and zero-point Energies= -3534.572178 Hartree  
 Sum of electronic and thermal Energies= -3534.499838 Hartree  
 Sum of electronic and thermal Enthalpies= -3534.498894 Hartree  
 Sum of electronic and thermal Free Energies= -3534.683429 Hartree  
 The number of Imaginary frequencies = 1

| Center Number | Atomic Number | Atomic Type | Coordinates (Angstroms) |           |           |
|---------------|---------------|-------------|-------------------------|-----------|-----------|
|               |               |             | X                       | Y         | Z         |
| 1             | 6             | 0           | -3.502883               | 0.474277  | -0.126999 |
| 2             | 8             | 0           | -4.792251               | 0.721595  | -0.451754 |
| 3             | 8             | 0           | -2.810502               | 0.062377  | -1.648737 |
| 4             | 6             | 0           | -5.525695               | -0.537900 | -0.468648 |
| 5             | 6             | 0           | -4.852598               | -1.345498 | 0.659704  |
| 6             | 6             | 0           | -3.390025               | -0.862343 | 0.621716  |
| 7             | 1             | 0           | -5.337832               | -1.016543 | -1.437388 |
| 8             | 1             | 0           | -5.324590               | -1.093524 | 1.614516  |
| 9             | 1             | 0           | -4.955276               | -2.422239 | 0.503812  |
| 10            | 1             | 0           | -2.965883               | -0.684067 | 1.611809  |
| 11            | 1             | 0           | -2.731387               | -1.558654 | 0.100920  |
| 12            | 8             | 0           | -2.885332               | 1.562923  | 0.280261  |
| 13            | 6             | 0           | -2.847907               | 1.143301  | -2.605039 |
| 14            | 1             | 0           | -2.355535               | 2.032721  | -2.203244 |
| 15            | 1             | 0           | -2.334340               | 0.796354  | -3.504007 |
| 16            | 1             | 0           | -3.894393               | 1.357494  | -2.824694 |
| 17            | 1             | 0           | -1.948907               | 1.328018  | 0.607382  |
| 18            | 1             | 0           | -1.774267               | -0.210173 | -1.471856 |
| 19            | 6             | 0           | 3.322351                | -1.323681 | -0.438040 |
| 20            | 6             | 0           | 2.086426                | -1.821751 | -0.055764 |
| 21            | 6             | 0           | 2.590429                | -3.891325 | -1.198185 |
| 22            | 6             | 0           | 3.763864                | -3.357132 | -1.745748 |
| 23            | 6             | 0           | 4.076335                | -2.068705 | -1.346093 |
| 24            | 1             | 0           | 2.323066                | -4.918745 | -1.428207 |
| 25            | 6             | 0           | 4.085784                | -0.065949 | -0.141102 |
| 26            | 6             | 0           | 4.321769                | 1.910934  | 1.088020  |
| 27            | 6             | 0           | 3.464100                | 1.253189  | 0.206463  |
| 28            | 6             | 0           | 4.111368                | 3.194944  | 1.564691  |
| 29            | 6             | 0           | 2.245569                | 1.845627  | -0.085557 |
| 30            | 6             | 0           | 2.933174                | 3.816216  | 1.133376  |
| 31            | 1             | 0           | 2.725451                | 4.832199  | 1.457918  |
| 32            | 8             | 0           | 1.229763                | -1.008023 | 0.677617  |
| 33            | 8             | 0           | 1.317874                | 1.119585  | -0.822085 |
| 34            | 15            | 0           | 0.273295                | 0.083672  | -0.087412 |
| 35            | 8             | 0           | -0.531241               | 0.745348  | 1.000765  |
| 36            | 8             | 0           | -0.461602               | -0.562477 | -1.254009 |
| 37            | 6             | 0           | 1.711221                | -3.145146 | -0.393735 |



|     |   |   |            |           |           |     |   |   |           |           |           |
|-----|---|---|------------|-----------|-----------|-----|---|---|-----------|-----------|-----------|
| 38  | 6 | 0 | 1.965613   | 3.164186  | 0.347648  | 107 | 6 | 0 | -3.889401 | -5.048489 | 2.651517  |
| 39  | 6 | 0 | -6.999277  | -0.271143 | -0.300939 | 108 | 1 | 0 | -3.279871 | -4.940630 | 3.556174  |
| 40  | 6 | 0 | -7.927437  | -1.045533 | -1.004831 | 109 | 1 | 0 | -4.168308 | -4.042481 | 2.318632  |
| 41  | 6 | 0 | -7.460271  | 0.709260  | 0.587169  | 110 | 1 | 0 | -4.805938 | -5.580805 | 2.932847  |
| 42  | 6 | 0 | -9.297429  | -0.855913 | -0.816335 | 111 | 6 | 0 | -2.779011 | -7.238618 | 2.021213  |
| 43  | 1 | 0 | -7.577376  | -1.800444 | -1.705699 | 112 | 1 | 0 | -3.680862 | -7.786721 | 2.320391  |
| 44  | 6 | 0 | -8.828641  | 0.906569  | 0.766835  | 113 | 1 | 0 | -2.282119 | -7.804882 | 1.226040  |
| 45  | 1 | 0 | -6.743743  | 1.327951  | 1.119029  | 114 | 1 | 0 | -2.101779 | -7.210379 | 2.883118  |
| 46  | 6 | 0 | -9.750719  | 0.121869  | 0.069721  | 115 | 6 | 0 | -3.104936 | 5.784279  | -0.987209 |
| 47  | 1 | 0 | -10.007890 | -1.465074 | -1.368515 | 116 | 6 | 0 | -4.323403 | 5.059228  | -0.386132 |
| 48  | 1 | 0 | -9.176070  | 1.675931  | 1.451133  | 117 | 1 | 0 | -4.320617 | 3.993135  | -0.634338 |
| 49  | 1 | 0 | -10.816726 | 0.276764  | 0.212431  | 118 | 1 | 0 | -4.335762 | 5.140422  | 0.707255  |
| 50  | 6 | 0 | 0.439798   | -3.770111 | 0.104164  | 119 | 1 | 0 | -5.254812 | 5.502719  | -0.758800 |
| 51  | 6 | 0 | 0.272464   | -4.022563 | 1.490679  | 120 | 6 | 0 | -3.098822 | 7.272987  | -0.587583 |
| 52  | 6 | 0 | -0.573615  | -4.174117 | -0.803065 | 121 | 1 | 0 | -4.031474 | 7.762736  | -0.893791 |
| 53  | 6 | 0 | -0.890148  | -4.662051 | 1.932717  | 122 | 1 | 0 | -3.001189 | 7.386988  | 0.498816  |
| 54  | 6 | 0 | -1.714966  | -4.813916 | -0.301255 | 123 | 1 | 0 | -2.263239 | 7.805814  | -1.054780 |
| 55  | 6 | 0 | -1.898397  | -5.071520 | 1.057743  | 124 | 7 | 0 | 5.136217  | -1.311195 | -1.848941 |
| 56  | 1 | 0 | -0.999909  | -4.860134 | 2.996006  | 125 | 7 | 0 | 5.341727  | 1.057511  | 1.516708  |
| 57  | 1 | 0 | -2.486233  | -5.135035 | -0.998141 | 126 | 6 | 0 | 5.117488  | -0.026569 | -1.356413 |
| 58  | 6 | 0 | 0.672042   | 3.846278  | 0.014346  | 127 | 6 | 0 | 5.178415  | -0.213320 | 1.013689  |
| 59  | 6 | 0 | -0.239994  | 4.204765  | 1.043349  | 128 | 8 | 0 | 5.825023  | 0.896829  | -1.699752 |
| 60  | 6 | 0 | 0.358064   | 4.154469  | -1.332192 | 129 | 8 | 0 | 5.814151  | -1.203420 | 1.308876  |
| 61  | 6 | 0 | -1.440263  | 4.832339  | 0.694770  | 130 | 6 | 0 | 5.124981  | 3.753951  | 2.540345  |
| 62  | 6 | 0 | -0.867364  | 4.768170  | -1.621203 | 131 | 6 | 0 | 5.742796  | 2.610266  | 3.377382  |
| 63  | 6 | 0 | -1.787683  | 5.108581  | -0.629212 | 132 | 1 | 0 | 4.656676  | 4.489768  | 3.203833  |
| 64  | 1 | 0 | -2.133660  | 5.101460  | 1.486892  | 133 | 1 | 0 | 5.924203  | 4.283968  | 2.001530  |
| 65  | 1 | 0 | -1.105995  | 5.005636  | -2.656237 | 134 | 6 | 0 | 6.328542  | 1.488714  | 2.501412  |
| 66  | 6 | 0 | -0.467849  | -3.975844 | -2.317324 | 135 | 1 | 0 | 6.538124  | 2.999314  | 4.022621  |
| 67  | 6 | 0 | -0.195431  | -5.314124 | -3.036236 | 136 | 1 | 0 | 4.970654  | 2.187151  | 4.031644  |
| 68  | 6 | 0 | -1.713825  | -3.307571 | -2.928094 | 137 | 1 | 0 | 7.225090  | 1.843132  | 1.974915  |
| 69  | 1 | 0 | 0.375194   | -3.307975 | -2.511296 | 138 | 1 | 0 | 6.614199  | 0.617005  | 3.096218  |
| 70  | 1 | 0 | -1.030102  | -6.011901 | -2.896401 | 139 | 6 | 0 | 4.690085  | -4.042605 | -2.730106 |
| 71  | 1 | 0 | 0.708016   | -5.806539 | -2.661734 | 140 | 6 | 0 | 6.079793  | -3.367464 | -2.748047 |
| 72  | 1 | 0 | -1.926764  | -2.351618 | -2.445883 | 141 | 1 | 0 | 4.254169  | -4.009307 | -3.739648 |
| 73  | 1 | 0 | -2.603859  | -3.943270 | -2.846526 | 142 | 1 | 0 | 4.798981  | -5.104927 | -2.479753 |
| 74  | 6 | 0 | 1.335339   | -3.675317 | 2.534359  | 143 | 6 | 0 | 5.990680  | -1.839559 | -2.905037 |
| 75  | 6 | 0 | 0.803441   | -2.695782 | 3.598003  | 144 | 1 | 0 | 6.604386  | -3.598088 | -1.811270 |
| 76  | 6 | 0 | 1.911795   | -4.947294 | 3.188175  | 145 | 1 | 0 | 6.684652  | -3.772391 | -3.566603 |
| 77  | 1 | 0 | 2.167630   | -3.180396 | 2.029131  | 146 | 1 | 0 | 6.971825  | -1.364701 | -2.819938 |
| 78  | 1 | 0 | -0.008132  | -3.140235 | 4.187191  | 147 | 1 | 0 | 5.575428  | -1.575007 | -3.887931 |
| 79  | 1 | 0 | 0.428736   | -1.779083 | 3.133382  | 148 | 1 | 0 | -3.814062 | -5.913409 | 0.692360  |
| 80  | 1 | 0 | 2.326981   | -5.626596 | 2.435217  | 149 | 1 | 0 | -3.200714 | 5.739662  | -2.081330 |
| 81  | 1 | 0 | 1.146478   | -5.497473 | 3.748684  |     |   |   |           |           |           |
| 82  | 6 | 0 | 1.332218   | 3.910037  | -2.485878 |     |   |   |           |           |           |
| 83  | 6 | 0 | 0.738802   | 3.010320  | -3.585925 |     |   |   |           |           |           |
| 84  | 6 | 0 | 1.829283   | 5.246244  | -3.074571 |     |   |   |           |           |           |
| 85  | 1 | 0 | 2.211085   | 3.394996  | -2.090719 |     |   |   |           |           |           |
| 86  | 1 | 0 | -0.130262  | 3.476553  | -4.066634 |     |   |   |           |           |           |
| 87  | 1 | 0 | 0.432678   | 2.043278  | -3.175947 |     |   |   |           |           |           |
| 88  | 1 | 0 | 2.293111   | 5.870179  | -2.302469 |     |   |   |           |           |           |
| 89  | 1 | 0 | 1.007778   | 5.821015  | -3.518866 |     |   |   |           |           |           |
| 90  | 6 | 0 | 0.032712   | 3.962030  | 2.530881  |     |   |   |           |           |           |
| 91  | 6 | 0 | 0.304021   | 5.293471  | 3.262239  |     |   |   |           |           |           |
| 92  | 6 | 0 | -1.096034  | 3.187287  | 3.237394  |     |   |   |           |           |           |
| 93  | 1 | 0 | 0.931808   | 3.347177  | 2.616077  |     |   |   |           |           |           |
| 94  | 1 | 0 | -0.579415  | 5.943065  | 3.241701  |     |   |   |           |           |           |
| 95  | 1 | 0 | 1.129067   | 5.851091  | 2.804550  |     |   |   |           |           |           |
| 96  | 1 | 0 | -1.244405  | 2.211569  | 2.770449  |     |   |   |           |           |           |
| 97  | 1 | 0 | -2.046414  | 3.733582  | 3.219728  |     |   |   |           |           |           |
| 98  | 1 | 0 | -0.831792  | 3.025538  | 4.289976  |     |   |   |           |           |           |
| 99  | 1 | 0 | 0.558956   | 5.110760  | 4.313525  |     |   |   |           |           |           |
| 100 | 1 | 0 | 1.485582   | 2.826329  | -4.367913 |     |   |   |           |           |           |
| 101 | 1 | 0 | 2.574563   | 5.065824  | -3.858765 |     |   |   |           |           |           |
| 102 | 1 | 0 | -1.548249  | -3.119186 | -3.996031 |     |   |   |           |           |           |
| 103 | 1 | 0 | -0.071197  | -5.153773 | -4.114392 |     |   |   |           |           |           |
| 104 | 1 | 0 | 2.714268   | -4.685738 | 3.888344  |     |   |   |           |           |           |
| 105 | 1 | 0 | 1.604833   | -2.423166 | 4.295532  |     |   |   |           |           |           |
| 106 | 6 | 0 | -3.134136  | -5.814335 | 1.550336  |     |   |   |           |           |           |

Optimized structure of Cy-SPINOL-derived CPA (S)-1ga

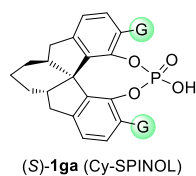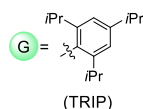

distance: 4.84 Å (+1.3%)  
 angle: 96.1° (-3.5%)  
 dihedral: 66.9° (+9.3%)

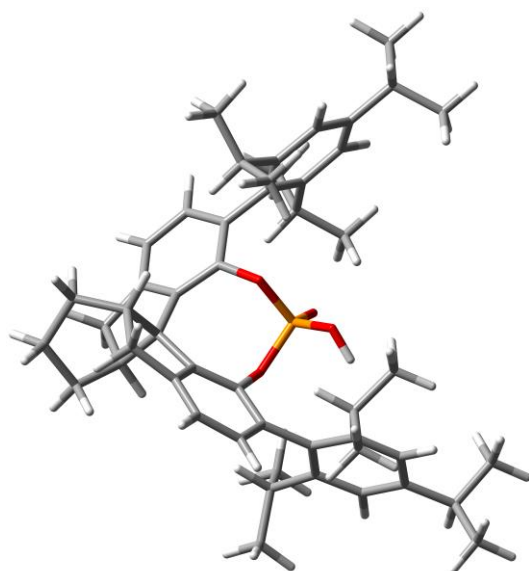

B3LYP/6-31G(d); E(RB3LYP) = -2585.65908158 Hartree

Zero-point correction= 1.026655 Hartree  
 Thermal correction to Energy= 1.081351 Hartree  
 Thermal correction to Enthalpy= 1.082295 Hartree  
 Thermal correction to Gibbs Free Energy= 0.938460 Hartree  
 Sum of electronic and zero-point Energies= -2584.632426 Hartree  
 Sum of electronic and thermal Energies= -2584.577731 Hartree  
 Sum of electronic and thermal Enthalpies= -2584.576787 Hartree  
 Sum of electronic and thermal Free Energies= -2584.720621 Hartree  
 The number of Imaginary frequencies = 0

| Center Number | Atomic Number | Atomic Type | Coordinates (Angstroms) |           |           |
|---------------|---------------|-------------|-------------------------|-----------|-----------|
|               |               |             | X                       | Y         | Z         |
| 1             | 6             | 0           | -0.882367               | 4.257332  | 2.118632  |
| 2             | 6             | 0           | 0.392185                | 4.104926  | 1.241351  |
| 3             | 6             | 0           | -1.245818               | 2.479244  | 0.552290  |
| 4             | 6             | 0           | -1.799075               | 3.162668  | 1.643456  |
| 5             | 6             | 0           | -0.406016               | 4.165535  | -1.229511 |
| 6             | 6             | 0           | 0.895786                | 4.324440  | -2.068671 |
| 7             | 6             | 0           | 1.789062                | 3.205748  | -1.598899 |
| 8             | 6             | 0           | 1.168696                | 2.459750  | -0.587501 |
| 9             | 6             | 0           | -0.031162               | 3.217720  | -0.012041 |
| 10            | 6             | 0           | -1.857614               | 1.293743  | 0.143615  |
| 11            | 6             | 0           | -3.082114               | 0.853170  | 0.683498  |
| 12            | 6             | 0           | -3.671130               | 1.654611  | 1.674623  |
| 13            | 6             | 0           | -3.022059               | 2.776760  | 2.185407  |
| 14            | 6             | 0           | 3.044508                | 2.846727  | -2.081564 |
| 15            | 6             | 0           | 3.671488                | 1.711318  | -1.571236 |
| 16            | 6             | 0           | 3.019351                | 0.846989  | -0.675961 |
| 17            | 6             | 0           | 1.740567                | 1.233656  | -0.236178 |
| 18            | 8             | 0           | 0.978885                | 0.330380  | 0.530538  |
| 19            | 8             | 0           | -1.223190               | 0.504722  | -0.819944 |
| 20            | 15            | 0           | -0.065215               | -0.544602 | -0.353718 |
| 21            | 8             | 0           | -0.685424               | -1.389603 | 0.861100  |
| 22            | 8             | 0           | 0.443181                | -1.268548 | -1.530770 |
| 23            | 6             | 0           | -3.714898               | -0.440506 | 0.254253  |
| 24            | 6             | 0           | 3.690729                | -0.413167 | -0.211006 |

|    |   |   |           |           |           |
|----|---|---|-----------|-----------|-----------|
| 25 | 6 | 0 | 4.070204  | -0.547779 | 1.147418  |
| 26 | 6 | 0 | 4.739247  | -1.708006 | 1.553898  |
| 27 | 6 | 0 | 5.056581  | -2.738101 | 0.670162  |
| 28 | 6 | 0 | 4.682534  | -2.580288 | -0.666016 |
| 29 | 6 | 0 | 4.004719  | -1.448613 | -1.130943 |
| 30 | 6 | 0 | -3.875972 | -1.510963 | 1.184303  |
| 31 | 6 | 0 | -4.433184 | -2.716004 | 0.736564  |
| 32 | 6 | 0 | -4.854797 | -2.907563 | -0.581693 |
| 33 | 6 | 0 | -4.718709 | -1.835525 | -1.462351 |
| 34 | 6 | 0 | -4.162233 | -0.609142 | -1.080630 |
| 35 | 6 | 0 | 3.654000  | -1.384687 | -2.619689 |
| 36 | 6 | 0 | 4.916365  | -1.156291 | -3.477306 |
| 37 | 6 | 0 | 2.901141  | -2.637084 | -3.108310 |
| 38 | 6 | 0 | 3.827866  | 0.538843  | 2.196022  |
| 39 | 6 | 0 | 2.943996  | 0.038387  | 3.354593  |
| 40 | 6 | 0 | 5.157739  | 1.115664  | 2.721747  |
| 41 | 6 | 0 | -3.530003 | -1.394514 | 2.675481  |
| 42 | 6 | 0 | -4.818595 | -1.246450 | 3.513223  |
| 43 | 6 | 0 | -2.696311 | -2.571444 | 3.221309  |
| 44 | 6 | 0 | -4.125656 | 0.514537  | -2.116643 |
| 45 | 6 | 0 | -3.358855 | 0.118435  | -3.392536 |
| 46 | 6 | 0 | -5.554380 | 0.989418  | -2.452837 |
| 47 | 6 | 0 | -5.449773 | -4.230292 | -1.045733 |
| 48 | 6 | 0 | -4.431684 | -5.381827 | -0.942111 |
| 49 | 6 | 0 | -6.750663 | -4.571682 | -0.294682 |
| 50 | 6 | 0 | 5.784392  | -3.985224 | 1.154393  |
| 51 | 6 | 0 | 4.922417  | -5.251230 | 0.988815  |
| 52 | 6 | 0 | 7.153471  | -4.156003 | 0.469427  |
| 53 | 6 | 0 | 0.997584  | 5.460597  | 0.858675  |
| 54 | 6 | 0 | -0.987611 | 5.515420  | -0.792654 |
| 55 | 6 | 0 | 0.011162  | 6.345241  | 0.054144  |
| 56 | 1 | 0 | -0.647469 | 4.143358  | 3.184461  |
| 57 | 1 | 0 | -1.339319 | 5.248624  | 2.013352  |
| 58 | 1 | 0 | 1.133094  | 3.527524  | 1.806729  |
| 59 | 1 | 0 | -1.147417 | 3.632728  | -1.836418 |
| 60 | 1 | 0 | 0.686523  | 4.233155  | -3.142079 |
| 61 | 1 | 0 | 1.357582  | 5.309421  | -1.933351 |
| 62 | 1 | 0 | -4.633864 | 1.359408  | 2.079100  |
| 63 | 1 | 0 | -3.462562 | 3.334023  | 3.008411  |
| 64 | 1 | 0 | 3.534366  | 3.443114  | -2.847370 |
| 65 | 1 | 0 | 4.670181  | 1.449966  | -1.906029 |
| 66 | 1 | 0 | 5.031044  | -1.808761 | 2.597137  |
| 67 | 1 | 0 | 4.920107  | -3.368537 | -1.375348 |
| 68 | 1 | 0 | -4.550590 | -3.528446 | 1.448268  |
| 69 | 1 | 0 | -5.060438 | -1.958958 | -2.487303 |
| 70 | 1 | 0 | 2.981379  | -0.537584 | -2.774725 |
| 71 | 1 | 0 | 4.648659  | -1.065278 | -4.537194 |
| 72 | 1 | 0 | 5.454988  | -0.247637 | -3.185838 |
| 73 | 1 | 0 | 5.615564  | -1.995943 | -3.380830 |
| 74 | 1 | 0 | 2.612296  | -2.507230 | -4.158618 |
| 75 | 1 | 0 | 1.992568  | -2.792449 | -2.523633 |
| 76 | 1 | 0 | 3.522265  | -3.539217 | -3.051355 |
| 77 | 1 | 0 | 3.295223  | 1.365661  | 1.718932  |
| 78 | 1 | 0 | 3.432287  | -0.767491 | 3.915312  |
| 79 | 1 | 0 | 2.741766  | 0.854329  | 4.059865  |
| 80 | 1 | 0 | 1.986965  | -0.338345 | 2.981786  |
| 81 | 1 | 0 | 5.769180  | 1.511203  | 1.902928  |
| 82 | 1 | 0 | 5.750298  | 0.353943  | 3.241819  |
| 83 | 1 | 0 | 4.968775  | 1.931401  | 3.430598  |
| 84 | 1 | 0 | -2.932673 | -0.490530 | 2.818458  |
| 85 | 1 | 0 | -4.573519 | -1.088739 | 4.570385  |
| 86 | 1 | 0 | -5.432570 | -0.404212 | 3.177575  |
| 87 | 1 | 0 | -5.436147 | -2.149843 | 3.442776  |
| 88 | 1 | 0 | -2.460342 | -2.393663 | 4.276937  |
| 89 | 1 | 0 | -1.747332 | -2.685949 | 2.689958  |
| 90 | 1 | 0 | -3.237091 | -3.523117 | 3.167452  |
| 91 | 1 | 0 | -3.604570 | 1.368667  | -1.677786 |
| 92 | 1 | 0 | -3.298048 | 0.974840  | -4.074982 |
| 93 | 1 | 0 | -2.340601 | -0.204249 | -3.157856 |

|     |   |   |           |           |           |     |   |   |           |           |           |
|-----|---|---|-----------|-----------|-----------|-----|---|---|-----------|-----------|-----------|
| 94  | 1 | 0 | -3.860320 | -0.693453 | -3.932599 | 107 | 1 | 0 | 7.684167  | -5.025660 | 0.875741  |
| 95  | 1 | 0 | -5.521707 | 1.829751  | -3.156767 | 108 | 1 | 0 | 7.783126  | -3.271679 | 0.617076  |
| 96  | 1 | 0 | -6.086150 | 1.319656  | -1.553366 | 109 | 1 | 0 | 7.042104  | -4.309443 | -0.610533 |
| 97  | 1 | 0 | -6.144927 | 0.189696  | -2.915333 | 110 | 1 | 0 | 1.310633  | 5.985689  | 1.770038  |
| 98  | 1 | 0 | -4.859091 | -6.311166 | -1.336953 | 111 | 1 | 0 | 1.915175  | 5.290496  | 0.284094  |
| 99  | 1 | 0 | -3.520627 | -5.158093 | -1.507535 | 112 | 1 | 0 | -1.287012 | 6.086045  | -1.680809 |
| 100 | 1 | 0 | -4.142346 | -5.565301 | 0.099573  | 113 | 1 | 0 | -1.910845 | 5.337609  | -0.228342 |
| 101 | 1 | 0 | -7.192205 | -5.494547 | -0.689123 | 114 | 1 | 0 | 0.584456  | 7.021256  | -0.590809 |
| 102 | 1 | 0 | -7.489573 | -3.769227 | -0.395648 | 115 | 1 | 0 | -0.551975 | 6.997968  | 0.731395  |
| 103 | 1 | 0 | -6.566072 | -4.723477 | 0.775500  | 116 | 1 | 0 | -1.543978 | -1.787794 | 0.619428  |
| 104 | 1 | 0 | 5.439472  | -6.128373 | 1.396844  | 117 | 1 | 0 | 5.969930  | -3.852687 | 2.229379  |
| 105 | 1 | 0 | 3.963254  | -5.146846 | 1.507437  | 118 | 1 | 0 | -5.705074 | -4.111996 | -2.107590 |
| 106 | 1 | 0 | 4.708985  | -5.451145 | -0.067857 |     |   |   |           |           |           |

#### DFT calculation for all conformations of real system using Cy-SPINOL-derived CPA (S)-Iga

| TS            | Orientation I | Orientation II | $\Delta\Delta G^\ddagger$ (a.u.) | $\Delta\Delta G^\ddagger$ (kcal/mmol) |
|---------------|---------------|----------------|----------------------------------|---------------------------------------|
| <i>R-anti</i> | up            | up             | -3237.783695                     | -1.06                                 |
|               | up            | down           | -3237.783858                     | -1.16                                 |
|               | down          | up             | -3237.784410                     | -1.51                                 |
|               | down          | down           | -3237.783176                     | -0.73                                 |

| TS          | Orientation I | Orientation II | $\Delta\Delta G^\ddagger$ (a.u.) | $\Delta\Delta G^\ddagger$ (kcal/mmol) |
|-------------|---------------|----------------|----------------------------------|---------------------------------------|
| <i>R-re</i> | up            | up             | -3237.782005                     | 0.00                                  |
|             | up            | down           | -3237.781048                     | 0.60                                  |
|             | down          | up             | -3237.780722                     | 0.81                                  |
|             | down          | down           | -3237.781204                     | 0.50                                  |

|               |      |      |              |      |
|---------------|------|------|--------------|------|
| <i>S-anti</i> | up   | up   | -3237.776556 | 3.42 |
|               | up   | down | -3237.777016 | 3.13 |
|               | down | up   | -3237.775437 | 4.12 |
|               | down | down | -3237.776137 | 3.68 |

|             |      |      |              |      |
|-------------|------|------|--------------|------|
| <i>S-si</i> | up   | up   | -3237.779510 | 1.57 |
|             | up   | down | -3237.778033 | 2.49 |
|             | down | up   | -3237.779687 | 1.45 |
|             | down | down | -3237.779924 | 1.31 |

|              |      |      |              |      |
|--------------|------|------|--------------|------|
| <i>S-syn</i> | up   | up   | -3237.778129 | 2.43 |
|              | up   | down | -3237.779085 | 1.83 |
|              | down | down | -3237.778401 | 2.26 |
|              | down | up   | -3237.777997 | 2.52 |

|             |      |      |              |       |
|-------------|------|------|--------------|-------|
| <i>S-re</i> | up   | up   | -3237.782338 | -0.21 |
|             | up   | down | -3237.780577 | 0.90  |
|             | down | up   | -3237.781510 | 0.31  |
|             | down | down | -3237.781326 | 0.43  |

\* Assignments of "up" and "down" are shown in ESI page S55.

#### DFT calculation of real system using Cy-SPINOL-derive CPA (S)-Iga

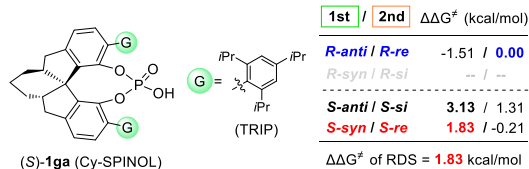

#### TS-1st-(R)-reaction pathway: *R-anti*-(S)-Iga (Cy-SPINOL)

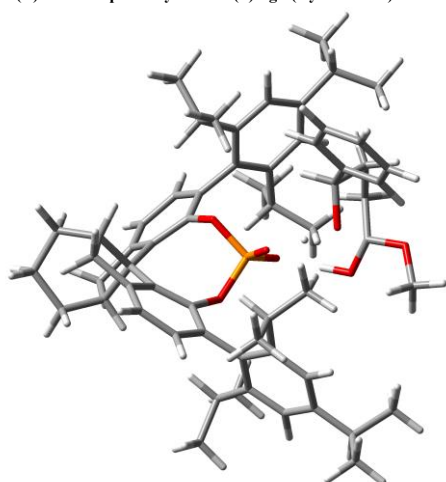

B3LYP/6-31G(d); E(B3LYP) = -3238.940382 hartree

Zero-point Energy Correction = 1.260477 hartree

Thermal Correction to Energy = 1.328243 hartree

Thermal correction to Enthalpy = 1.329188 hartree

Thermal correction to Gibbs Free Energy = 1.155973 hartree

Sum of electronic and Zero-point Energies = -3237.679905 hartree

Sum of electronic and thermal Energies = -3237.612139 hartree

Sum of electronic and thermal Enthalpies = -3237.611195 hartree

Sum of electronic and thermal Free Energies = -3237.784410 hartree

The number of Imaginary frequencies = 1

| Center Number | Atomic Number | Atomic Type | Coordinates (Angstroms) |           |           |
|---------------|---------------|-------------|-------------------------|-----------|-----------|
|               |               |             | X                       | Y         | Z         |
| 1             | 6             | 0           | -1.316553               | 4.210154  | 3.148812  |
| 2             | 6             | 0           | -0.076459               | 4.459863  | 2.241101  |
| 3             | 6             | 0           | -1.569506               | 2.923768  | 1.142883  |
| 4             | 6             | 0           | -2.164274               | 3.236824  | 2.372046  |
| 5             | 6             | 0           | -1.061327               | 5.142630  | -0.061374 |
| 6             | 6             | 0           | 0.125179                | 5.697383  | -0.898092 |
| 7             | 6             | 0           | 1.167446                | 4.613262  | -0.840579 |
| 8             | 6             | 0           | 0.745974                | 3.546897  | -0.035883 |
| 9             | 6             | 0           | -0.476671               | 3.934773  | 0.795944  |
| 10            | 6             | 0           | -2.077115               | 1.842346  | 0.417689  |
| 11            | 6             | 0           | -3.306336               | 1.239919  | 0.750516  |
| 12            | 6             | 0           | -3.952159               | 1.704243  | 1.909215  |
| 13            | 6             | 0           | -3.363951               | 2.643695  | 2.753528  |
| 14            | 6             | 0           | 2.394603                | 4.572782  | -1.495516 |
| 15            | 6             | 0           | 3.189325                | 3.436444  | -1.372156 |
| 16            | 6             | 0           | 2.741098                | 2.287327  | -0.698081 |
| 17            | 6             | 0           | 1.485810                | 2.360658  | -0.063143 |
| 18            | 8             | 0           | 0.953318                | 1.225884  | 0.551448  |
| 19            | 8             | 0           | -1.333012               | 1.338813  | -0.653291 |
| 20            | 15            | 0           | -0.103432               | 0.314597  | -0.313180 |
| 21            | 8             | 0           | -0.550803               | -0.759411 | 0.678198  |
| 22            | 8             | 0           | 0.472826                | -0.135085 | -1.630052 |
| 23            | 6             | 0           | -3.948404               | 0.168571  | -0.083425 |
| 24            | 6             | 0           | 3.620120                | 1.070227  | -0.670001 |
| 25            | 6             | 0           | 4.181307                | 0.625179  | 0.553036  |
| 26            | 6             | 0           | 5.077589                | -0.451002 | 0.539911  |
| 27            | 6             | 0           | 5.467408                | -1.090796 | -0.638065 |
| 28            | 6             | 0           | 4.898957                | -0.639658 | -1.831923 |
| 29            | 6             | 0           | 3.981741                | 0.417624  | -1.879183 |

|    |   |   |           |           |           |     |   |   |           |           |           |
|----|---|---|-----------|-----------|-----------|-----|---|---|-----------|-----------|-----------|
| 30 | 6 | 0 | -4.225047 | -1.111074 | 0.470353  | 99  | 1 | 0 | -4.189083 | -3.779177 | -3.222820 |
| 31 | 6 | 0 | -4.892417 | -2.058588 | -0.313057 | 100 | 1 | 0 | -4.871586 | -4.595993 | -1.805785 |
| 32 | 6 | 0 | -5.294440 | -1.800848 | -1.625499 | 101 | 1 | 0 | -7.885832 | -3.978443 | -2.480736 |
| 33 | 6 | 0 | -5.013953 | -0.539900 | -2.148001 | 102 | 1 | 0 | -8.006031 | -2.405577 | -1.665579 |
| 34 | 6 | 0 | -4.358562 | 0.453139  | -1.410325 | 103 | 1 | 0 | -7.202658 | -3.762487 | -0.861796 |
| 35 | 6 | 0 | 3.444736  | 0.834319  | -3.252351 | 104 | 1 | 0 | 6.987603  | -4.166088 | -1.362129 |
| 36 | 6 | 0 | 4.553729  | 1.475968  | -4.112680 | 105 | 1 | 0 | 5.251761  | -3.845012 | -1.201662 |
| 37 | 6 | 0 | 2.794171  | -0.331904 | -4.020386 | 106 | 1 | 0 | 6.168543  | -3.140199 | -2.542652 |
| 38 | 6 | 0 | 3.916107  | 1.317933  | 1.890720  | 107 | 1 | 0 | 8.699941  | -2.344184 | -0.917986 |
| 39 | 6 | 0 | 3.263411  | 0.375419  | 2.919579  | 108 | 1 | 0 | 8.179960  | -0.744544 | -0.346975 |
| 40 | 6 | 0 | 5.204983  | 1.948120  | 2.456435  | 109 | 1 | 0 | 7.899254  | -1.216513 | -2.029467 |
| 41 | 6 | 0 | -3.843540 | -1.508286 | 1.899033  | 110 | 1 | 0 | 0.696452  | 6.196850  | 3.267760  |
| 42 | 6 | 0 | -5.086224 | -1.596390 | 2.809728  | 111 | 1 | 0 | 1.255390  | 6.035017  | 1.618231  |
| 43 | 6 | 0 | -3.066245 | -2.836367 | 1.961753  | 112 | 1 | 0 | -2.155168 | 6.995691  | 0.122623  |
| 44 | 6 | 0 | -4.175830 | 1.820412  | -2.070571 | 113 | 1 | 0 | -2.583727 | 5.793017  | 1.317293  |
| 45 | 6 | 0 | -3.320259 | 1.738806  | -3.349005 | 114 | 1 | 0 | -0.292714 | 7.781434  | 1.343216  |
| 46 | 6 | 0 | -5.537463 | 2.486885  | -2.354257 | 115 | 1 | 0 | -1.318700 | 7.258497  | 2.652586  |
| 47 | 6 | 0 | -6.016603 | -2.848857 | -2.462104 | 116 | 6 | 0 | 0.516795  | -3.420565 | -1.351417 |
| 48 | 6 | 0 | -5.125590 | -4.075316 | -2.737158 | 117 | 8 | 0 | 0.155773  | -3.044211 | 0.280152  |
| 49 | 6 | 0 | -7.356018 | -3.271795 | -1.830287 | 118 | 6 | 0 | 1.360124  | -3.206621 | 1.087893  |
| 50 | 6 | 0 | 6.540308  | -2.173998 | -0.607760 | 119 | 6 | 0 | 2.401984  | -3.820999 | 0.130289  |
| 51 | 6 | 0 | 6.213160  | -3.398914 | -1.478377 | 120 | 6 | 0 | 2.026209  | -3.283004 | -1.249940 |
| 52 | 6 | 0 | 7.912232  | -1.584812 | -0.996569 | 121 | 1 | 0 | 1.682547  | -2.200243 | 1.375525  |
| 53 | 6 | 0 | 0.369653  | 5.926860  | 2.255442  | 122 | 1 | 0 | 2.337796  | -4.912968 | 0.146890  |
| 54 | 6 | 0 | -1.731118 | 6.231205  | 0.786234  | 123 | 1 | 0 | 3.412832  | -3.532587 | 0.429851  |
| 55 | 6 | 0 | -0.750753 | 6.891126  | 1.789769  | 124 | 1 | 0 | 2.491341  | -3.838938 | -2.068849 |
| 56 | 1 | 0 | -1.018895 | 3.786026  | 4.116493  | 125 | 1 | 0 | 2.290647  | -2.226765 | -1.350619 |
| 57 | 1 | 0 | -1.854509 | 5.137551  | 3.377578  | 126 | 8 | 0 | -0.204099 | -2.595366 | -2.093698 |
| 58 | 1 | 0 | 0.747004  | 3.829175  | 2.596237  | 127 | 8 | 0 | 0.149542  | -4.712523 | -1.468643 |
| 59 | 1 | 0 | -1.801692 | 4.717640  | -0.749213 | 128 | 6 | 0 | -1.251960 | -4.969542 | -1.675852 |
| 60 | 1 | 0 | -0.178661 | 5.899263  | -1.933258 | 129 | 1 | 0 | -1.350210 | -6.055393 | -1.645554 |
| 61 | 1 | 0 | 0.500576  | 6.648828  | -0.502173 | 130 | 1 | 0 | -1.574619 | -4.585130 | -2.645336 |
| 62 | 1 | 0 | -4.916934 | 1.280271  | 2.166815  | 131 | 1 | 0 | -1.845929 | -4.512061 | -0.880163 |
| 63 | 1 | 0 | -3.843332 | 2.912815  | 3.691602  | 132 | 6 | 0 | 1.073447  | -4.022299 | 2.326963  |
| 64 | 1 | 0 | 2.732904  | 5.415420  | -2.093583 | 133 | 6 | 0 | 1.448717  | -3.541578 | 3.584912  |
| 65 | 1 | 0 | 4.168132  | 3.411201  | -1.840266 | 134 | 6 | 0 | 0.456148  | -5.277219 | 2.232581  |
| 66 | 1 | 0 | 5.516570  | -0.779975 | 1.480019  | 135 | 6 | 0 | 1.223560  | -4.304939 | 4.732769  |
| 67 | 1 | 0 | 5.185365  | -1.116043 | -2.765544 | 136 | 1 | 0 | 1.915658  | -2.562926 | 3.668295  |
| 68 | 1 | 0 | -5.104749 | -3.032555 | 0.120345  | 137 | 6 | 0 | 0.223156  | -6.035899 | 3.377672  |
| 69 | 1 | 0 | -5.329432 | -0.316442 | -3.164929 | 138 | 1 | 0 | 0.153292  | -5.648992 | 1.257607  |
| 70 | 1 | 0 | 2.662532  | 1.581154  | -3.099019 | 139 | 6 | 0 | 0.609613  | -5.552974 | 4.631432  |
| 71 | 1 | 0 | 4.143973  | 1.820859  | -5.069761 | 140 | 1 | 0 | 1.520676  | -3.919189 | 5.704320  |
| 72 | 1 | 0 | 5.016958  | 2.334652  | -3.614755 | 141 | 1 | 0 | -0.260573 | -7.005623 | 3.293895  |
| 73 | 1 | 0 | 5.351113  | 0.755680  | -4.332462 | 142 | 1 | 0 | 0.428247  | -6.146441 | 5.523590  |
| 74 | 1 | 0 | 2.406516  | 0.027564  | -4.981352 | 143 | 1 | 0 | -0.221676 | -1.978470 | 0.418319  |
| 75 | 1 | 0 | 1.957586  | -0.747723 | -3.455927 | 144 | 1 | 0 | 0.090131  | -1.627130 | -1.992544 |
| 76 | 1 | 0 | 3.510574  | -1.133398 | -4.237776 | 145 | 1 | 0 | 6.617477  | -4.520750 | 0.432460  |
| 77 | 1 | 0 | 3.215513  | 2.138319  | 1.719189  | 146 | 1 | 0 | -6.243262 | -2.386028 | -3.432460 |
| 78 | 1 | 0 | 3.911937  | -0.478151 | 3.153783  |     |   |   |           |           |           |
| 79 | 1 | 0 | 3.071373  | 0.909801  | 3.858151  |     |   |   |           |           |           |
| 80 | 1 | 0 | 2.306776  | -0.003202 | 2.545974  |     |   |   |           |           |           |
| 81 | 1 | 0 | 5.653955  | 2.642175  | 1.737281  |     |   |   |           |           |           |
| 82 | 1 | 0 | 5.956252  | 1.187472  | 2.699726  |     |   |   |           |           |           |
| 83 | 1 | 0 | 4.986658  | 2.505106  | 3.375812  |     |   |   |           |           |           |
| 84 | 1 | 0 | -3.181632 | -0.736799 | 2.299673  |     |   |   |           |           |           |
| 85 | 1 | 0 | -4.791187 | -1.832569 | 3.839571  |     |   |   |           |           |           |
| 86 | 1 | 0 | -5.654708 | -0.660626 | 2.828227  |     |   |   |           |           |           |
| 87 | 1 | 0 | -5.767313 | -2.385725 | 2.468728  |     |   |   |           |           |           |
| 88 | 1 | 0 | -2.725404 | -3.023723 | 2.986965  |     |   |   |           |           |           |
| 89 | 1 | 0 | -2.186794 | -2.813743 | 1.316031  |     |   |   |           |           |           |
| 90 | 1 | 0 | -3.689023 | -3.690118 | 1.667314  |     |   |   |           |           |           |
| 91 | 1 | 0 | -3.648849 | 2.473265  | -1.371040 |     |   |   |           |           |           |
| 92 | 1 | 0 | -3.162777 | 2.741941  | -3.764733 |     |   |   |           |           |           |
| 93 | 1 | 0 | -2.341906 | 1.298587  | -3.136852 |     |   |   |           |           |           |
| 94 | 1 | 0 | -3.808212 | 1.135423  | -4.123893 |     |   |   |           |           |           |
| 95 | 1 | 0 | -5.392822 | 3.489523  | -2.775268 |     |   |   |           |           |           |
| 96 | 1 | 0 | -6.129647 | 2.585402  | -1.437367 |     |   |   |           |           |           |
| 97 | 1 | 0 | -6.129197 | 1.907044  | -3.072284 |     |   |   |           |           |           |
| 98 | 1 | 0 | -5.639360 | -4.791474 | -3.390149 |     |   |   |           |           |           |

TS-1st-(S)-reaction pathway: S-anti(S)-Iga (Cy-SPINOL)

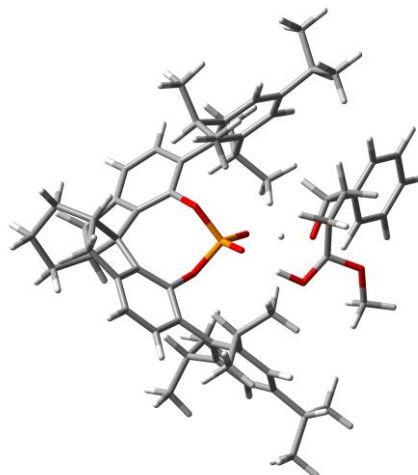

|                                                                   |        |        |                         |           |           |           |
|-------------------------------------------------------------------|--------|--------|-------------------------|-----------|-----------|-----------|
| B3LYP/6-31G(d); E(B3LYP) = -3238.933781 hartree                   | 56     | 1      | 0                       | -3.153578 | 4.610138  | 2.637418  |
| Zero-point Energy Correction = 1.260586 hartree                   | 57     | 1      | 0                       | -4.158174 | 5.213014  | 1.334817  |
| Thermal Correction to Energy = 1.328330 hartree                   | 58     | 1      | 0                       | -1.189371 | 4.703933  | 1.389903  |
| Thermal correction to Enthalpy = 1.329274 hartree                 | 59     | 1      | 0                       | -3.072674 | 3.292623  | -2.209246 |
| Thermal correction to Gibbs Free Energy= 1.156764 hartree         | 60     | 1      | 0                       | -1.620903 | 4.436316  | -3.628265 |
| Sum of electronic and Zero-point Energies = -3237.673194 hartree  | 61     | 1      | 0                       | -1.553043 | 5.863154  | -2.613548 |
| Sum of electronic and thermal Energies = -3237.605451 hartree     | 62     | 1      | 0                       | -5.670973 | 0.385432  | 1.657103  |
| Sum of electronic and thermal Enthalpies = -3237.604507 hartree   | 63     | 1      | 0                       | -5.479224 | 2.746782  | 2.378185  |
| Sum of electronic and thermal Free Energies= -3237.777016 hartree | 64     | 1      | 0                       | 1.252905  | 5.094399  | -3.252307 |
| The number of Imaginary frequencies = 1                           | 65     | 1      | 0                       | 3.108370  | 3.972222  | -2.049540 |
| -----                                                             |        |        |                         |           |           |           |
| Center                                                            | Atomic | Atomic | Coordinates (Angstroms) |           |           |           |
| Number                                                            | Number | Type   | X                       | Y         | Z         |           |
| -----                                                             |        |        |                         |           |           |           |
| 1                                                                 | 6      | 0      | -3.345017               | 4.513194  | 1.560910  | 70        |
| 2                                                                 | 6      | 0      | -2.061199               | 4.814736  | 0.734586  | 71        |
| 3                                                                 | 6      | 0      | -2.780867               | 2.558164  | 0.292177  | 72        |
| 4                                                                 | 6      | 0      | -3.697925               | 3.093056  | 1.206895  | 73        |
| 5                                                                 | 6      | 0      | -2.664164               | 4.176508  | -1.705532 | 74        |
| 6                                                                 | 6      | 0      | -1.528172               | 4.767407  | -2.585849 | 75        |
| 7                                                                 | 6      | 0      | -0.260396               | 4.244956  | -1.966786 | 76        |
| 8                                                                 | 6      | 0      | -0.530983               | 3.454982  | -0.840956 | 77        |
| 9                                                                 | 6      | 0      | -1.968112               | 3.670835  | -0.366281 | 78        |
| 10                                                                | 6      | 0      | -2.786458               | 1.177105  | 0.074507  | 79        |
| 11                                                                | 6      | 0      | -3.831910               | 0.361070  | 0.552174  | 80        |
| 12                                                                | 6      | 0      | -4.833181               | 0.985092  | 1.317117  | 81        |
| 13                                                                | 6      | 0      | -4.742454               | 2.319821  | 1.702081  | 82        |
| 14                                                                | 6      | 0      | 1.044152                | 4.444236  | -2.406257 | 83        |
| 15                                                                | 6      | 0      | 2.081698                | 3.796168  | -1.744529 | 84        |
| 16                                                                | 6      | 0      | 1.841118                | 2.857423  | -0.725663 | 85        |
| 17                                                                | 6      | 0      | 0.507002                | 2.682296  | -0.306732 | 86        |
| 18                                                                | 8      | 0      | 0.214208                | 1.733645  | 0.675516  | 87        |
| 19                                                                | 8      | 0      | -1.712463               | 0.597803  | -0.613179 | 88        |
| 20                                                                | 15     | 0      | -0.372162               | 0.261696  | 0.268465  | 89        |
| 21                                                                | 8      | 0      | -0.679641               | -0.440497 | 1.565220  | 90        |
| 22                                                                | 8      | 0      | 0.562658                | -0.454753 | -0.712522 | 91        |
| 23                                                                | 6      | 0      | -3.925769               | -1.113373 | 0.288902  | 92        |
| 24                                                                | 6      | 0      | 3.007619                | 2.101069  | -0.162073 | 93        |
| 25                                                                | 6      | 0      | 3.382651                | 2.252713  | 1.197048  | 94        |
| 26                                                                | 6      | 0      | 4.538580                | 1.614801  | 1.662659  | 95        |
| 27                                                                | 6      | 0      | 5.346782                | 0.832394  | 0.835348  | 96        |
| 28                                                                | 6      | 0      | 4.952954                | 0.686081  | -0.496917 | 97        |
| 29                                                                | 6      | 0      | 3.809952                | 1.303229  | -1.021552 | 98        |
| 30                                                                | 6      | 0      | -3.969319               | -2.033420 | 1.371440  | 99        |
| 31                                                                | 6      | 0      | -4.129988               | -3.396023 | 1.091905  | 100       |
| 32                                                                | 6      | 0      | -4.264200               | -3.890920 | -0.205144 | 101       |
| 33                                                                | 6      | 0      | -4.227324               | -2.968975 | -1.252377 | 102       |
| 34                                                                | 6      | 0      | -4.061960               | -1.597005 | -1.038588 | 103       |
| 35                                                                | 6      | 0      | 3.515631                | 1.105799  | -2.513086 | 104       |
| 36                                                                | 6      | 0      | 4.617121                | 1.742295  | -3.386012 | 105       |
| 37                                                                | 6      | 0      | 3.318089                | -0.371493 | -2.896337 | 106       |
| 38                                                                | 6      | 0      | 2.621482                | 3.148747  | 2.175746  | 107       |
| 39                                                                | 6      | 0      | 2.087805                | 2.363543  | 3.388649  | 108       |
| 40                                                                | 6      | 0      | 3.487175                | 4.344238  | 2.623720  | 109       |
| 41                                                                | 6      | 0      | -3.903799               | -1.614641 | 2.845351  | 110       |
| 42                                                                | 6      | 0      | -5.268726               | -1.828283 | 3.535008  | 111       |
| 43                                                                | 6      | 0      | -2.802372               | -2.334638 | 3.645848  | 112       |
| 44                                                                | 6      | 0      | -4.108521               | -0.680372 | -2.262067 | 113       |
| 45                                                                | 6      | 0      | -2.988959               | -0.999810 | -3.271008 | 114       |
| 46                                                                | 6      | 0      | -5.494315               | -0.724693 | -2.937711 | 115       |
| 47                                                                | 6      | 0      | -4.509887               | -5.375033 | -0.448065 | 116       |
| 48                                                                | 6      | 0      | -5.994081               | -5.641783 | -0.771158 | 117       |
| 49                                                                | 6      | 0      | -3.602107               | -5.968233 | -1.539623 | 118       |
| 50                                                                | 6      | 0      | 6.660249                | 0.225957  | 1.316832  | 119       |
| 51                                                                | 6      | 0      | 7.780392                | 1.286845  | 1.310035  | 120       |
| 52                                                                | 6      | 0      | 6.566621                | -0.450433 | 2.694784  | 121       |
| 53                                                                | 6      | 0      | -2.073257               | 6.231804  | 0.148126  | 122       |
| 54                                                                | 6      | 0      | -3.793640               | 5.185853  | -1.468622 | 123       |
| 55                                                                | 6      | 0      | -3.294995               | 6.479152  | -0.774385 | 124       |

|     |   |   |           |           |           |
|-----|---|---|-----------|-----------|-----------|
| 125 | 1 | 0 | 1.503286  | -3.335219 | 3.223533  |
| 126 | 1 | 0 | 1.299693  | -1.728120 | 2.489465  |
| 127 | 8 | 0 | -0.556047 | -3.007915 | 1.135077  |
| 128 | 8 | 0 | 0.952854  | -4.662617 | 1.072141  |
| 129 | 6 | 0 | 0.091974  | -5.369468 | 0.164923  |
| 130 | 1 | 0 | 0.495113  | -6.381611 | 0.116177  |
| 131 | 1 | 0 | -0.933597 | -5.381734 | 0.539442  |
| 132 | 1 | 0 | 0.116570  | -4.906182 | -0.825472 |
| 133 | 1 | 0 | -0.689623 | -2.026838 | 1.352109  |
| 134 | 6 | 0 | 3.775297  | -3.285250 | -0.691150 |
| 135 | 6 | 0 | 3.266466  | -3.963181 | -1.802996 |
| 136 | 6 | 0 | 5.152052  | -3.352588 | -0.431710 |
| 137 | 6 | 0 | 4.114299  | -4.699941 | -2.633253 |
| 138 | 1 | 0 | 2.205532  | -3.906780 | -2.018792 |
| 139 | 6 | 0 | 5.999309  | -4.084904 | -1.262742 |
| 140 | 1 | 0 | 5.566901  | -2.829391 | 0.426552  |
| 141 | 6 | 0 | 5.481934  | -4.764400 | -2.367695 |
| 142 | 1 | 0 | 3.701498  | -5.222225 | -3.492554 |
| 143 | 1 | 0 | 7.063508  | -4.125985 | -1.045370 |
| 144 | 1 | 0 | 6.140202  | -5.336927 | -3.015580 |
| 145 | 1 | 0 | -4.280690 | -5.897146 | 0.491549  |
| 146 | 1 | 0 | 6.941263  | -0.547849 | 0.588403  |

TS-1st-(S)-reaction pathway: S-syn/(S)-Iga (Cy-SPINOL)

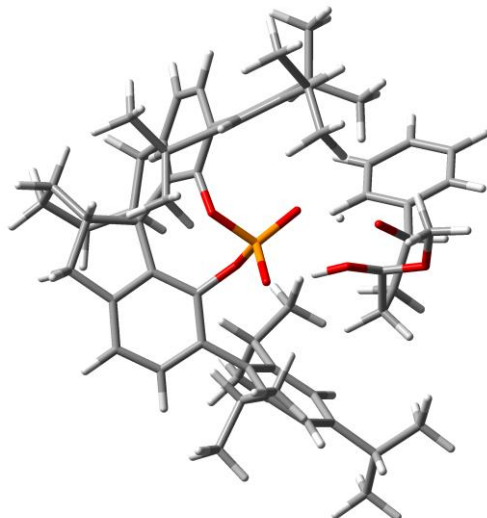

B3LYP/6-31G(d); E(B3LYP) = -3238.933745 hartree  
 Zero-point Energy Correction = 1.260299 hartree  
 Thermal Correction to Energy = 1.328323 hartree  
 Thermal correction to Enthalpy = 1.329267 hartree  
 Thermal correction to Gibbs Free Energy = 1.154660 hartree  
 Sum of electronic and Zero-point Energies = -3237.673446 hartree  
 Sum of electronic and thermal Energies = -3237.605422 hartree  
 Sum of electronic and thermal Enthalpies = -3237.604478 hartree  
 Sum of electronic and thermal Free Energies = -3237.779085 hartree  
 The number of Imaginary frequencies = 1

| Center Number | Atomic Number | Atomic Type | Coordinates (Angstroms) |          |           |
|---------------|---------------|-------------|-------------------------|----------|-----------|
|               |               |             | X                       | Y        | Z         |
| 1             | 6             | 0           | 0.240324                | 5.473378 | -1.085127 |
| 2             | 6             | 0           | -0.895756               | 4.965464 | -0.154749 |
| 3             | 6             | 0           | 0.867073                | 3.319905 | -0.231826 |
| 4             | 6             | 0           | 1.251269                | 4.359251 | -1.089125 |
| 5             | 6             | 0           | 0.221197                | 4.278323 | 2.086021  |
| 6             | 6             | 0           | -0.969805               | 4.079913 | 3.070486  |
| 7             | 6             | 0           | -1.897914               | 3.131846 | 2.355423  |
| 8             | 6             | 0           | -1.382015               | 2.778342 | 1.102059  |
| 9             | 6             | 0           | -0.283814               | 3.751213 | 0.676384  |
| 10            | 6             | 0           | 1.578094                | 2.116540 | -0.282323 |

|    |    |   |           |           |           |
|----|----|---|-----------|-----------|-----------|
| 11 | 6  | 0 | 2.780312  | 2.001993  | -1.008359 |
| 12 | 6  | 0 | 3.196681  | 3.122355  | -1.747495 |
| 13 | 6  | 0 | 2.420280  | 4.273949  | -1.838299 |
| 14 | 6  | 0 | -3.102124 | 2.596400  | 2.802663  |
| 15 | 6  | 0 | -3.775311 | 1.680519  | 1.996192  |
| 16 | 6  | 0 | -3.209853 | 1.172743  | 0.813599  |
| 17 | 6  | 0 | -1.966857 | 1.708185  | 0.420672  |
| 18 | 8  | 0 | -1.290688 | 1.153740  | -0.669913 |
| 19 | 8  | 0 | 1.066374  | 1.010065  | 0.403368  |
| 20 | 15 | 0 | -0.069141 | 0.107503  | -0.370459 |
| 21 | 8  | 0 | 0.417332  | -0.396047 | -1.701426 |
| 22 | 8  | 0 | -0.489428 | -0.921346 | 0.681161  |
| 23 | 6  | 0 | 3.658514  | 0.783198  | -0.996009 |
| 24 | 6  | 0 | -3.948154 | 0.137652  | 0.014442  |
| 25 | 6  | 0 | -4.370091 | 0.430350  | -1.310478 |
| 26 | 6  | 0 | -5.107264 | -0.523396 | -2.018269 |
| 27 | 6  | 0 | -5.464564 | -1.755217 | -1.467002 |
| 28 | 6  | 0 | -5.056547 | -2.016423 | -0.160446 |
| 29 | 6  | 0 | -4.304053 | -1.107870 | 0.594564  |
| 30 | 6  | 0 | 3.884821  | 0.043702  | -2.185460 |
| 31 | 6  | 0 | 4.807479  | -1.010884 | -2.157866 |
| 32 | 6  | 0 | 5.514738  | -1.365624 | -1.008756 |
| 33 | 6  | 0 | 5.271049  | -0.627626 | 0.152396  |
| 34 | 6  | 0 | 4.368711  | 0.441631  | 0.183700  |
| 35 | 6  | 0 | -3.913286 | -1.520610 | 2.015733  |
| 36 | 6  | 0 | -5.131584 | -1.512534 | 2.962797  |
| 37 | 6  | 0 | -3.235991 | -2.903387 | 2.063619  |
| 38 | 6  | 0 | -4.112903 | 1.772773  | -1.997539 |
| 39 | 6  | 0 | -3.308515 | 1.614176  | -3.301677 |
| 40 | 6  | 0 | -5.433118 | 2.530427  | -2.246632 |
| 41 | 6  | 0 | 3.210376  | 0.375711  | -3.519834 |
| 42 | 6  | 0 | 4.216088  | 1.016105  | -4.500879 |
| 43 | 6  | 0 | 2.547879  | -0.844181 | -4.187394 |
| 44 | 6  | 0 | 4.259743  | 1.252172  | 1.476727  |
| 45 | 6  | 0 | 3.821252  | 0.394284  | 2.676958  |
| 46 | 6  | 0 | 5.580412  | 1.989601  | 1.778162  |
| 47 | 6  | 0 | 6.549065  | -2.484391 | -1.043906 |
| 48 | 6  | 0 | 7.972533  | -1.943418 | -0.806355 |
| 49 | 6  | 0 | 6.224163  | -3.620785 | -0.057389 |
| 50 | 6  | 0 | -6.267111 | -2.781691 | -2.255298 |
| 51 | 6  | 0 | -7.643656 | -2.238661 | -2.682469 |
| 52 | 6  | 0 | -5.479852 | -3.306248 | -3.471334 |
| 53 | 6  | 0 | -1.469575 | 6.085605  | 0.721025  |
| 54 | 6  | 0 | 0.714934  | 5.729562  | 2.051040  |
| 55 | 6  | 0 | -0.400272 | 6.725951  | 1.642298  |
| 56 | 1  | 0 | -0.133995 | 5.674379  | -2.097043 |
| 57 | 1  | 0 | 0.674386  | 6.416025  | -0.729766 |
| 58 | 1  | 0 | -1.697278 | 4.554105  | -0.779326 |
| 59 | 1  | 0 | 1.044267  | 3.624834  | 2.398505  |
| 60 | 1  | 0 | -0.628429 | 3.651875  | 4.022003  |
| 61 | 1  | 0 | -1.458569 | 5.027861  | 3.323909  |
| 62 | 1  | 0 | 4.137054  | 3.062946  | -2.285684 |
| 63 | 1  | 0 | 2.729178  | 5.094457  | -2.481313 |
| 64 | 1  | 0 | -3.523629 | 2.896015  | 3.759180  |
| 65 | 1  | 0 | -4.748304 | 1.311047  | 2.301690  |
| 66 | 1  | 0 | -0.295529 | -2.188011 | 0.522844  |
| 67 | 1  | 0 | -5.423179 | -0.287461 | -3.031329 |
| 68 | 1  | 0 | -5.331238 | -2.968821 | 0.287266  |
| 69 | 1  | 0 | 4.993124  | -1.568456 | -3.073090 |
| 70 | 1  | 0 | 5.822653  | -0.869923 | 1.057879  |
| 71 | 1  | 0 | -3.184904 | -0.797766 | 2.391712  |
| 72 | 1  | 0 | -4.826045 | -1.776235 | 3.982862  |
| 73 | 1  | 0 | -5.623297 | -0.534718 | 2.999973  |
| 74 | 1  | 0 | -5.882747 | -2.243515 | 2.639739  |
| 75 | 1  | 0 | -2.843706 | -3.094327 | 3.069448  |
| 76 | 1  | 0 | -2.403575 | -2.964474 | 1.360168  |
| 77 | 1  | 0 | -3.940633 | -3.710843 | 1.829485  |
| 78 | 1  | 0 | -3.518176 | 2.396473  | -1.326699 |
| 79 | 1  | 0 | -3.866709 | 1.043772  | -4.053868 |

|     |   |   |           |           |           |
|-----|---|---|-----------|-----------|-----------|
| 80  | 1 | 0 | -3.088287 | 2.598429  | -3.733721 |
| 81  | 1 | 0 | -2.360591 | 1.101477  | -3.116173 |
| 82  | 1 | 0 | -5.985430 | 2.682795  | -1.312416 |
| 83  | 1 | 0 | -6.088464 | 1.984589  | -2.935586 |
| 84  | 1 | 0 | -5.232580 | 3.514608  | -2.687902 |
| 85  | 1 | 0 | 2.415006  | 1.099337  | -3.325763 |
| 86  | 1 | 0 | 3.713785  | 1.296563  | -5.434685 |
| 87  | 1 | 0 | 4.683058  | 1.915558  | -4.086366 |
| 88  | 1 | 0 | 5.020897  | 0.314347  | -4.752183 |
| 89  | 1 | 0 | 2.041102  | -0.530623 | -5.108005 |
| 90  | 1 | 0 | 1.799675  | -1.293962 | -3.533057 |
| 91  | 1 | 0 | 3.280914  | -1.610711 | -4.466294 |
| 92  | 1 | 0 | 3.495890  | 2.020626  | 1.336728  |
| 93  | 1 | 0 | 3.714767  | 1.018521  | 3.572683  |
| 94  | 1 | 0 | 2.857138  | -0.085932 | 2.483664  |
| 95  | 1 | 0 | 4.552620  | -0.389055 | 2.908429  |
| 96  | 1 | 0 | 5.474558  | 2.616737  | 2.671922  |
| 97  | 1 | 0 | 5.872216  | 2.635332  | 0.942534  |
| 98  | 1 | 0 | 6.402249  | 1.286814  | 1.959499  |
| 99  | 1 | 0 | 8.713608  | -2.746776 | -0.897932 |
| 100 | 1 | 0 | 8.223724  | -1.161732 | -1.531392 |
| 101 | 1 | 0 | 8.070263  | -1.511481 | 0.196695  |
| 102 | 1 | 0 | 6.968365  | -4.422756 | -0.132152 |
| 103 | 1 | 0 | 5.238492  | -4.053200 | -0.262346 |
| 104 | 1 | 0 | 6.224504  | -3.262908 | 0.979027  |
| 105 | 1 | 0 | -8.224979 | -3.015561 | -3.193930 |
| 106 | 1 | 0 | -7.541790 | -1.392374 | -3.372185 |
| 107 | 1 | 0 | -8.219775 | -1.894977 | -1.816362 |
| 108 | 1 | 0 | -4.517150 | -3.730414 | -3.165430 |
| 109 | 1 | 0 | -6.047453 | -4.084501 | -3.996289 |
| 110 | 1 | 0 | -5.273931 | -2.501977 | -4.187502 |
| 111 | 1 | 0 | -1.914074 | 6.854798  | 0.076510  |
| 112 | 1 | 0 | -2.296599 | 5.683534  | 1.317019  |
| 113 | 1 | 0 | 1.115131  | 6.001898  | 3.035989  |
| 114 | 1 | 0 | 1.560763  | 5.798541  | 1.356567  |
| 115 | 1 | 0 | -0.894367 | 7.129394  | 2.533999  |
| 116 | 1 | 0 | 0.057819  | 7.590536  | 1.147771  |
| 117 | 6 | 0 | 0.507551  | -3.640204 | -1.097986 |
| 118 | 8 | 0 | -0.130938 | -3.317889 | 0.413316  |
| 119 | 6 | 0 | 0.900206  | -3.836947 | 1.317915  |
| 120 | 6 | 0 | 1.992313  | -3.352452 | -0.822068 |
| 121 | 1 | 0 | 2.571583  | -4.147077 | -1.298845 |
| 122 | 1 | 0 | 2.265367  | -2.405119 | -1.288554 |
| 123 | 8 | 0 | -0.179279 | -2.908030 | -1.966305 |
| 124 | 8 | 0 | 0.302939  | -4.972285 | -1.248507 |
| 125 | 6 | 0 | -1.032014 | -5.376510 | -1.602474 |
| 126 | 1 | 0 | -1.019640 | -6.466809 | -1.568007 |
| 127 | 1 | 0 | -1.284995 | -5.031153 | -2.607090 |
| 128 | 1 | 0 | -1.754237 | -4.982809 | -0.881873 |
| 129 | 1 | 0 | 0.067351  | -1.925128 | -1.926529 |
| 130 | 6 | 0 | 0.634417  | -3.539258 | 2.774600  |
| 131 | 6 | 0 | 0.606987  | -2.235219 | 3.291220  |
| 132 | 6 | 0 | 0.443288  | -4.616457 | 3.649968  |
| 133 | 6 | 0 | 0.389142  | -2.023577 | 4.652290  |
| 134 | 1 | 0 | 0.717424  | -1.384532 | 2.628003  |
| 135 | 6 | 0 | 0.235297  | -4.404765 | 5.013346  |
| 136 | 1 | 0 | 0.458818  | -5.631741 | 3.260037  |
| 137 | 6 | 0 | 0.206762  | -3.104547 | 5.517728  |
| 138 | 1 | 0 | 0.361143  | -1.007615 | 5.036575  |
| 139 | 1 | 0 | 0.091449  | -5.253497 | 5.676573  |
| 140 | 1 | 0 | 0.041239  | -2.933449 | 6.578156  |
| 141 | 1 | 0 | 0.851013  | -4.919233 | 1.173677  |
| 142 | 6 | 0 | 2.204910  | -3.305277 | 0.709206  |
| 143 | 1 | 0 | 3.060835  | -3.901673 | 1.037043  |
| 144 | 1 | 0 | 2.380723  | -2.276380 | 1.035344  |
| 145 | 1 | 0 | -6.444713 | -3.634923 | -1.585848 |
| 146 | 1 | 0 | 6.526310  | -2.912159 | -2.055698 |

**TS-2nd-(R)-reaction pathway: R-re/(S)-1ga (Cy-SPINOL)**

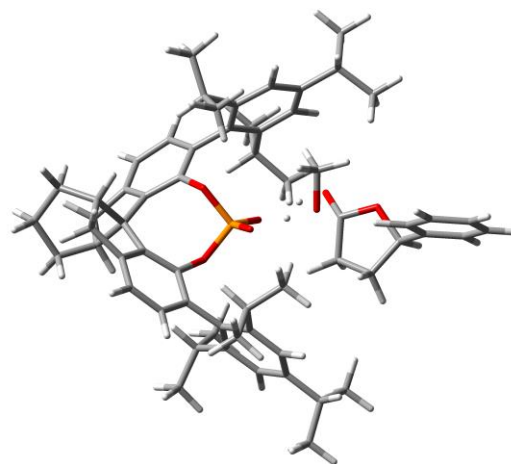

B3LYP/6-31G(d); E(B3LYP) = -3238.937809 hartree

Zero-point Energy Correction = 1.261298 hartree

Thermal Correction to Energy = 1.329144 hartree

Thermal correction to Enthalpy = 1.330089 hartree

Thermal correction to Gibbs Free Energy = 1.155780 hartree

Sum of electronic and Zero-point Energies = -3237.676512 hartree

Sum of electronic and thermal Energies = -3237.608665 hartree

Sum of electronic and thermal Enthalpies = -3237.607721 hartree

Sum of electronic and thermal Free Energies = -3237.782029 hartree

The number of Imaginary frequencies = 1

| Center Number | Atomic Number | Atomic Type | Coordinates (Angstroms) |           |           |
|---------------|---------------|-------------|-------------------------|-----------|-----------|
|               |               |             | X                       | Y         | Z         |
| 1             | 6             | 0           | -5.896457               | 0.025821  | 1.294477  |
| 2             | 6             | 0           | -5.364396               | 1.224076  | 0.458414  |
| 3             | 6             | 0           | -3.908075               | -0.669540 | 0.148661  |
| 4             | 6             | 0           | -4.896939               | -1.073342 | 1.055366  |
| 5             | 6             | 0           | -5.047120               | 0.322788  | -1.953471 |
| 6             | 6             | 0           | -4.827074               | 1.586072  | -2.835160 |
| 7             | 6             | 0           | -3.710473               | 2.333768  | -2.155327 |
| 8             | 6             | 0           | -3.284771               | 1.661767  | -1.001435 |
| 9             | 6             | 0           | -4.316098               | 0.615293  | -0.573450 |
| 10            | 6             | 0           | -2.769272               | -1.468412 | 0.010772  |
| 11            | 6             | 0           | -2.682895               | -2.744881 | 0.602291  |
| 12            | 6             | 0           | -3.775418               | -3.171027 | 1.376109  |
| 13            | 6             | 0           | -4.852596               | -2.331546 | 1.648571  |
| 14            | 6             | 0           | -3.091193               | 3.510176  | -2.566495 |
| 15            | 6             | 0           | -2.005241               | 3.993149  | -1.839448 |
| 16            | 6             | 0           | -1.438395               | 3.260567  | -0.783106 |
| 17            | 6             | 0           | -2.083139               | 2.064132  | -0.410449 |
| 18            | 8             | 0           | -1.496499               | 1.251816  | 0.560959  |
| 19            | 8             | 0           | -1.690615               | -0.974801 | -0.723580 |
| 20            | 15            | 0           | -0.600705               | -0.020789 | 0.050151  |
| 21            | 8             | 0           | -0.030241               | -0.655597 | 1.290548  |
| 22            | 8             | 0           | 0.366046                | 0.397479  | -1.054501 |
| 23            | 6             | 0           | -1.474983               | -3.623443 | 0.457648  |
| 24            | 6             | 0           | -0.202791               | 3.767965  | -0.096822 |
| 25            | 6             | 0           | -0.244373               | 4.122222  | 1.277635  |
| 26            | 6             | 0           | 0.903549                | 4.640694  | 1.884931  |
| 27            | 6             | 0           | 2.097343                | 4.836141  | 1.187759  |
| 28            | 6             | 0           | 2.115972                | 4.490632  | -0.163227 |
| 29            | 6             | 0           | 1.000157                | 3.961963  | -0.825928 |
| 30            | 6             | 0           | -0.713883               | -3.988765 | 1.601669  |
| 31            | 6             | 0           | 0.408240                | -4.806367 | 1.434628  |
| 32            | 6             | 0           | 0.822311                | -5.270217 | 0.184537  |
| 33            | 6             | 0           | 0.045274                | -4.921368 | -0.920768 |
| 34            | 6             | 0           | -1.098706               | -4.120195 | -0.814208 |
| 35            | 6             | 0           | 1.139984                | 3.651513  | -2.319146 |
| 36            | 6             | 0           | 1.222118                | 4.947450  | -3.152853 |

|     |   |   |           |           |           |     |   |   |           |           |           |
|-----|---|---|-----------|-----------|-----------|-----|---|---|-----------|-----------|-----------|
| 37  | 6 | 0 | 2.350834  | 2.754479  | -2.637609 | 106 | 1 | 0 | 2.298778  | 6.972607  | 3.028056  |
| 38  | 6 | 0 | -1.510701 | 4.020526  | 2.129645  | 107 | 1 | 0 | 2.793686  | 7.508873  | 1.415696  |
| 39  | 6 | 0 | -1.320947 | 3.090406  | 3.343106  | 108 | 1 | 0 | 4.005330  | 3.558209  | 2.765367  |
| 40  | 6 | 0 | -1.998493 | 5.415889  | 2.569650  | 109 | 1 | 0 | 4.721842  | 5.013483  | 3.487379  |
| 41  | 6 | 0 | -1.073318 | -3.555316 | 3.026678  | 110 | 1 | 0 | 3.048538  | 4.569743  | 3.855600  |
| 42  | 6 | 0 | -1.615468 | -4.749586 | 3.840580  | 111 | 1 | 0 | -7.143283 | 2.441198  | 0.572454  |
| 43  | 6 | 0 | 0.095873  | -2.892436 | 3.779173  | 112 | 1 | 0 | -6.074739 | 2.867448  | -0.744098 |
| 44  | 6 | 0 | -1.929975 | -3.882117 | -2.075889 | 113 | 1 | 0 | -6.950689 | -0.273903 | -2.781971 |
| 45  | 6 | 0 | -1.129619 | -3.192159 | -3.196024 | 114 | 1 | 0 | -6.627858 | -0.930325 | -1.193000 |
| 46  | 6 | 0 | -2.555903 | -5.200394 | -2.575497 | 115 | 1 | 0 | -7.771570 | 1.775028  | -1.948788 |
| 47  | 6 | 0 | 2.051870  | -6.155013 | 0.024373  | 116 | 1 | 0 | -8.209483 | 0.717303  | -0.633562 |
| 48  | 6 | 0 | 3.301891  | -5.566744 | 0.704504  | 117 | 6 | 0 | 3.085111  | -0.933505 | 0.521485  |
| 49  | 6 | 0 | 1.777739  | -7.586952 | 0.525633  | 118 | 8 | 0 | 4.343260  | -1.407862 | 0.378249  |
| 50  | 6 | 0 | 3.327502  | 5.432838  | 1.859669  | 119 | 8 | 0 | 2.597470  | -0.616412 | -1.093530 |
| 51  | 6 | 0 | 3.091944  | 6.898152  | 2.274715  | 120 | 6 | 0 | 5.334255  | -0.343898 | 0.585421  |
| 52  | 6 | 0 | 3.802745  | 4.594123  | 3.060438  | 121 | 6 | 0 | 4.509682  | 0.958592  | 0.632087  |
| 53  | 6 | 0 | -6.499719 | 2.012120  | -0.206216 | 122 | 6 | 0 | 3.132051  | 0.476507  | 1.096222  |
| 54  | 6 | 0 | -6.533727 | -0.021368 | -1.798707 | 123 | 1 | 0 | 5.773506  | -0.548043 | 1.568703  |
| 55  | 6 | 0 | -7.347250 | 1.136850  | -1.164887 | 124 | 1 | 0 | 4.443496  | 1.407480  | -0.362001 |
| 56  | 1 | 0 | -5.955287 | 0.281111  | 2.360349  | 125 | 1 | 0 | 4.962290  | 1.691608  | 1.305045  |
| 57  | 1 | 0 | -6.910632 | -0.266303 | 0.996967  | 126 | 1 | 0 | 2.301048  | 1.102335  | 0.770852  |
| 58  | 1 | 0 | -4.807229 | 1.892324  | 1.125581  | 127 | 1 | 0 | 3.077784  | 0.375485  | 2.186135  |
| 59  | 1 | 0 | -4.528238 | -0.522933 | -2.419653 | 128 | 8 | 0 | 2.258550  | -1.854357 | 0.978136  |
| 60  | 1 | 0 | -4.545008 | 1.308904  | -3.859130 | 129 | 6 | 0 | 2.542599  | -1.805200 | -1.912115 |
| 61  | 1 | 0 | -5.736517 | 2.191538  | -2.926378 | 130 | 1 | 0 | 3.554425  | -2.204669 | -1.988842 |
| 62  | 1 | 0 | -3.744330 | -4.164844 | 1.811376  | 131 | 1 | 0 | 2.178051  | -1.501036 | -2.895596 |
| 63  | 1 | 0 | -5.641421 | -2.654721 | 2.323567  | 132 | 1 | 0 | 1.873186  | -2.548684 | -1.471752 |
| 64  | 1 | 0 | -3.448635 | 4.049608  | -3.440283 | 133 | 1 | 0 | 1.339222  | -1.448912 | 1.141204  |
| 65  | 1 | 0 | -1.548269 | 4.936721  | -2.119181 | 134 | 6 | 0 | 6.416074  | -0.415971 | -0.464151 |
| 66  | 1 | 0 | 1.593370  | -0.166096 | -1.066438 | 135 | 6 | 0 | 7.744935  | -0.622422 | -0.080997 |
| 67  | 1 | 0 | 0.854766  | 4.914741  | 2.935895  | 136 | 6 | 0 | 6.117429  | -0.262506 | -1.825774 |
| 68  | 1 | 0 | 3.034214  | 4.647653  | -0.725053 | 137 | 6 | 0 | 8.763511  | -0.666600 | -1.035342 |
| 69  | 1 | 0 | 0.987226  | -5.075495 | 2.313552  | 138 | 1 | 0 | 7.985385  | -0.751348 | 0.971951  |
| 70  | 1 | 0 | 0.331758  | -5.302024 | -1.899422 | 139 | 6 | 0 | 7.131095  | -0.315619 | -2.780307 |
| 71  | 1 | 0 | 0.251512  | 3.100562  | -2.635876 | 140 | 1 | 0 | 5.088467  | -0.102933 | -2.135263 |
| 72  | 1 | 0 | 1.259508  | 4.713455  | -4.223929 | 141 | 6 | 0 | 8.457684  | -0.515134 | -2.387359 |
| 73  | 1 | 0 | 0.362323  | 5.603190  | -2.980227 | 142 | 1 | 0 | 9.791611  | -0.825421 | -0.721561 |
| 74  | 1 | 0 | 2.124198  | 5.519907  | -2.904591 | 143 | 1 | 0 | 6.887291  | -0.198536 | -3.832847 |
| 75  | 1 | 0 | 2.363048  | 2.512808  | -3.707707 | 144 | 1 | 0 | 9.247017  | -0.553352 | -3.133211 |
| 76  | 1 | 0 | 2.302158  | 1.816910  | -2.080599 | 145 | 1 | 0 | 2.261277  | -6.219849 | -1.052811 |
| 77  | 1 | 0 | 3.302723  | 3.248395  | -2.406942 | 146 | 1 | 0 | 4.135850  | 5.428679  | 1.11518   |
| 78  | 1 | 0 | -2.305753 | 3.591266  | 1.515935  |     |   |   |           |           |           |
| 79  | 1 | 0 | -0.570340 | 3.483243  | 4.039925  |     |   |   |           |           |           |
| 80  | 1 | 0 | -2.262796 | 2.993448  | 3.897397  |     |   |   |           |           |           |
| 81  | 1 | 0 | -1.007064 | 2.092080  | 3.025843  |     |   |   |           |           |           |
| 82  | 1 | 0 | -2.177421 | 6.064821  | 1.704918  |     |   |   |           |           |           |
| 83  | 1 | 0 | -1.266663 | 5.915427  | 3.215488  |     |   |   |           |           |           |
| 84  | 1 | 0 | -2.936156 | 5.332552  | 3.132717  |     |   |   |           |           |           |
| 85  | 1 | 0 | -1.865907 | -2.806250 | 2.965793  |     |   |   |           |           |           |
| 86  | 1 | 0 | -1.934711 | -4.421814 | 4.837620  |     |   |   |           |           |           |
| 87  | 1 | 0 | -2.471753 | -5.226411 | 3.350643  |     |   |   |           |           |           |
| 88  | 1 | 0 | -0.845853 | -5.519864 | 3.973683  |     |   |   |           |           |           |
| 89  | 1 | 0 | -0.236526 | -2.585604 | 4.778731  |     |   |   |           |           |           |
| 90  | 1 | 0 | 0.441781  | -2.003246 | 3.249401  |     |   |   |           |           |           |
| 91  | 1 | 0 | 0.943875  | -3.574322 | 3.912548  |     |   |   |           |           |           |
| 92  | 1 | 0 | -2.758901 | -3.218185 | -1.818408 |     |   |   |           |           |           |
| 93  | 1 | 0 | -1.775394 | -3.002786 | -4.062463 |     |   |   |           |           |           |
| 94  | 1 | 0 | -0.730415 | -2.232814 | -2.854274 |     |   |   |           |           |           |
| 95  | 1 | 0 | -0.295085 | -3.815034 | -3.541340 |     |   |   |           |           |           |
| 96  | 1 | 0 | -3.199704 | -5.015001 | -3.444254 |     |   |   |           |           |           |
| 97  | 1 | 0 | -3.164740 | -5.669986 | -1.794810 |     |   |   |           |           |           |
| 98  | 1 | 0 | -1.787575 | -5.922080 | -2.877567 |     |   |   |           |           |           |
| 99  | 1 | 0 | 4.185275  | -6.172590 | 0.468575  |     |   |   |           |           |           |
| 100 | 1 | 0 | 3.490137  | -4.536913 | 0.384914  |     |   |   |           |           |           |
| 101 | 1 | 0 | 3.194549  | -5.555615 | 1.795577  |     |   |   |           |           |           |
| 102 | 1 | 0 | 2.650931  | -8.230948 | 0.363431  |     |   |   |           |           |           |
| 103 | 1 | 0 | 0.922429  | -8.032912 | 0.005991  |     |   |   |           |           |           |
| 104 | 1 | 0 | 1.553616  | -7.588829 | 1.599154  |     |   |   |           |           |           |
| 105 | 1 | 0 | 4.003101  | 7.332414  | 2.704040  |     |   |   |           |           |           |

TS-2nd-(S)-reaction pathway: S-si/(S)-Iga (Cy-SPINOL)

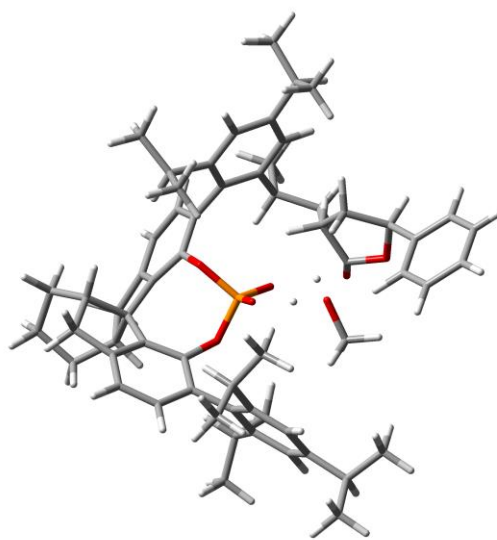

B3LYP/6-31G(d); E(B3LYP) = -3238.935855 hartree

Zero-point Energy Correction = 1.261444 hartree

Thermal Correction to Energy = 1.329344 hartree



|                                                                   |     |   |   |           |           |           |
|-------------------------------------------------------------------|-----|---|---|-----------|-----------|-----------|
| Thermal correction to Enthalpy = 1.330288 hartree                 | 59  | 1 | 0 | -4.478098 | -1.152655 | -2.094116 |
| Thermal correction to Gibbs Free Energy= 1.156167 hartree         | 60  | 1 | 0 | -4.821853 | 0.551088  | -3.644399 |
| Sum of electronic and Zero-point Energies = -3237.674410 hartree  | 61  | 1 | 0 | -6.043924 | 1.354516  | -2.679519 |
| Sum of electronic and thermal Energies = -3237.606511 hartree     | 62  | 1 | 0 | -3.061797 | -4.559040 | 1.899627  |
| Sum of electronic and thermal Enthalpies = -3237.605567 hartree   | 63  | 1 | 0 | -5.049582 | -3.257972 | 2.599514  |
| Sum of electronic and thermal Free Energies=- 3237.779687 hartree | 64  | 1 | 0 | -4.025202 | 3.404444  | -3.505768 |
| The number of Imaginary frequencies = 1                           | 65  | 1 | 0 | -2.187477 | 4.620673  | -2.373981 |
|                                                                   | 66  | 1 | 0 | 1.772083  | 0.686841  | -0.249118 |
|                                                                   | 67  | 1 | 0 | 0.352835  | 5.573688  | 2.420031  |
|                                                                   | 68  | 1 | 0 | 2.318523  | 5.234776  | -1.355833 |
|                                                                   | 69  | 1 | 0 | 1.559924  | -5.457802 | 2.008029  |
|                                                                   | 70  | 1 | 0 | 0.632731  | -5.349933 | -2.158465 |
|                                                                   | 71  | 1 | 0 | -0.231209 | 2.967187  | -2.831445 |
|                                                                   | 72  | 1 | 0 | 0.527196  | 4.424215  | -4.677990 |
|                                                                   | 73  | 1 | 0 | -0.434017 | 5.381109  | -3.536338 |
|                                                                   | 74  | 1 | 0 | 1.326896  | 5.517003  | -3.537292 |
|                                                                   | 75  | 1 | 0 | 1.925957  | 2.502392  | -3.909996 |
|                                                                   | 76  | 1 | 0 | 1.941883  | 1.986949  | -2.218658 |
|                                                                   | 77  | 1 | 0 | 2.786726  | 3.473782  | -2.711281 |
|                                                                   | 78  | 1 | 0 | -2.578407 | 3.525921  | 1.423539  |
|                                                                   | 79  | 1 | 0 | -0.705294 | 4.039394  | 3.793892  |
|                                                                   | 80  | 1 | 0 | -2.298972 | 3.276786  | 3.855632  |
|                                                                   | 81  | 1 | 0 | -0.972468 | 2.473485  | 2.997940  |
|                                                                   | 82  | 1 | 0 | -2.890314 | 5.990200  | 1.308671  |
|                                                                   | 83  | 1 | 0 | -1.897778 | 6.194568  | 2.760448  |
|                                                                   | 84  | 1 | 0 | -3.434916 | 5.322902  | 2.860561  |
|                                                                   | 85  | 1 | 0 | -1.142051 | -3.113255 | 2.996174  |
|                                                                   | 86  | 1 | 0 | -1.103291 | -4.826961 | 4.791034  |
|                                                                   | 87  | 1 | 0 | -1.798063 | -5.540583 | 3.325262  |
|                                                                   | 88  | 1 | 0 | -0.131873 | -5.907809 | 3.778720  |
|                                                                   | 89  | 1 | 0 | 0.625826  | -3.001787 | 4.664915  |
|                                                                   | 90  | 1 | 0 | 1.268219  | -2.454071 | 3.111670  |
|                                                                   | 91  | 1 | 0 | 1.676816  | -4.065248 | 3.726432  |
|                                                                   | 92  | 1 | 0 | -2.348338 | -3.181210 | -1.758117 |
|                                                                   | 93  | 1 | 0 | -1.410061 | -2.741016 | -3.994208 |
|                                                                   | 94  | 1 | 0 | -0.334070 | -2.109124 | -2.734818 |
|                                                                   | 95  | 1 | 0 | 0.072024  | -3.614883 | -3.586672 |
|                                                                   | 96  | 1 | 0 | -2.867431 | -4.778533 | -3.547997 |
|                                                                   | 97  | 1 | 0 | -2.784965 | -5.620358 | -1.987852 |
|                                                                   | 98  | 1 | 0 | -1.450952 | -5.759459 | -3.143046 |
|                                                                   | 99  | 1 | 0 | 2.667289  | -8.578800 | -0.935584 |
|                                                                   | 100 | 1 | 0 | 1.144024  | -8.269845 | -0.076321 |
|                                                                   | 101 | 1 | 0 | 1.318112  | -7.788877 | -1.770495 |
|                                                                   | 102 | 1 | 0 | 4.232076  | -6.666206 | -1.509156 |
|                                                                   | 103 | 1 | 0 | 3.841296  | -5.002249 | -1.035962 |
|                                                                   | 104 | 1 | 0 | 2.959291  | -5.778981 | -2.359788 |
|                                                                   | 105 | 1 | 0 | 2.902727  | 8.502973  | 1.655311  |
|                                                                   | 106 | 1 | 0 | 1.588409  | 8.269696  | 0.484164  |
|                                                                   | 107 | 1 | 0 | 1.347531  | 7.839927  | 2.183956  |
|                                                                   | 108 | 1 | 0 | 4.153572  | 6.500273  | 2.604471  |
|                                                                   | 109 | 1 | 0 | 3.745706  | 4.852726  | 2.090588  |
|                                                                   | 110 | 1 | 0 | 2.654786  | 5.742437  | 3.162823  |
|                                                                   | 111 | 1 | 0 | -7.240881 | 1.643788  | 0.923248  |
|                                                                   | 112 | 1 | 0 | -6.311961 | 2.115253  | -0.482368 |
|                                                                   | 113 | 1 | 0 | -6.932690 | -1.214656 | -2.301792 |
|                                                                   | 114 | 1 | 0 | -6.424754 | -1.732287 | -0.710513 |
|                                                                   | 115 | 1 | 0 | -7.941271 | 0.769952  | -1.512933 |
|                                                                   | 116 | 1 | 0 | -8.162418 | -0.260115 | -0.122931 |
|                                                                   | 117 | 6 | 0 | 3.157716  | -0.616727 | 1.021678  |
|                                                                   | 118 | 8 | 0 | 4.494708  | -0.540509 | 1.221662  |
|                                                                   | 119 | 8 | 0 | 2.812289  | 0.759838  | 0.095995  |
|                                                                   | 120 | 1 | 0 | 1.485750  | -0.506262 | 1.986684  |
|                                                                   | 121 | 6 | 0 | 5.221143  | -1.341767 | 0.230667  |
|                                                                   | 122 | 6 | 0 | 4.150155  | -1.762146 | -0.796229 |
|                                                                   | 123 | 6 | 0 | 2.860182  | -1.733572 | 0.029188  |
|                                                                   | 124 | 1 | 0 | 5.583928  | -2.219743 | 0.777675  |
|                                                                   | 125 | 1 | 0 | 4.099892  | -1.038035 | -1.613719 |
|                                                                   | 126 | 1 | 0 | 4.370334  | -2.742879 | -1.225265 |
|                                                                   | 127 | 1 | 0 | 1.956321  | -1.559229 | -0.554544 |

|     |   |   |          |           |           |
|-----|---|---|----------|-----------|-----------|
| 128 | 1 | 0 | 2.720361 | -2.653241 | 0.607656  |
| 129 | 8 | 0 | 2.488833 | -0.470674 | 2.155018  |
| 130 | 6 | 0 | 3.002240 | 1.985329  | 0.841000  |
| 131 | 1 | 0 | 2.809306 | 2.812556  | 0.158888  |
| 132 | 1 | 0 | 2.319031 | 2.029488  | 1.691658  |
| 133 | 1 | 0 | 4.036322 | 1.999025  | 1.187405  |
| 134 | 6 | 0 | 6.401939 | -0.573884 | -0.311471 |
| 135 | 6 | 0 | 6.227889 | 0.651458  | -0.970822 |
| 136 | 6 | 0 | 7.692616 | -1.095069 | -0.178833 |
| 137 | 6 | 0 | 7.326091 | 1.336384  | -1.486754 |
| 138 | 1 | 0 | 5.229634 | 1.066802  | -1.075035 |
| 139 | 6 | 0 | 8.793578 | -0.414313 | -0.703084 |
| 140 | 1 | 0 | 7.838546 | -2.040176 | 0.339603  |
| 141 | 6 | 0 | 8.612020 | 0.803862  | -1.356929 |
| 142 | 1 | 0 | 7.179637 | 2.286609  | -1.993416 |
| 143 | 1 | 0 | 9.790212 | -0.833346 | -0.594074 |
| 144 | 1 | 0 | 9.466800 | 1.338521  | -1.762345 |
| 145 | 1 | 0 | 2.904193 | -6.634424 | 0.589111  |
| 146 | 1 | 0 | 3.326121 | 6.494249  | 0.261977  |

|    |    |   |           |           |           |
|----|----|---|-----------|-----------|-----------|
| 17 | 6  | 0 | -2.369010 | 1.887195  | -0.286407 |
| 18 | 8  | 0 | -1.580253 | 1.132838  | 0.583088  |
| 19 | 8  | 0 | -1.753222 | -1.102068 | -0.691595 |
| 20 | 15 | 0 | -0.654580 | -0.050105 | -0.073010 |
| 21 | 8  | 0 | 0.139007  | -0.632732 | 1.068962  |
| 22 | 8  | 0 | 0.097132  | 0.455265  | -1.297680 |
| 23 | 6  | 0 | -1.133554 | -3.722591 | 0.397887  |
| 24 | 6  | 0 | -0.623722 | 3.754682  | -0.225295 |
| 25 | 6  | 0 | -0.508414 | 4.112173  | 1.144016  |
| 26 | 6  | 0 | 0.659752  | 4.736599  | 1.592753  |
| 27 | 6  | 0 | 1.725119  | 5.033854  | 0.740934  |
| 28 | 6  | 0 | 1.590046  | 4.682835  | -0.602264 |
| 29 | 6  | 0 | 0.445952  | 4.052684  | -1.110628 |
| 30 | 6  | 0 | -0.187362 | -4.030193 | 1.413847  |
| 31 | 6  | 0 | 0.967144  | -4.740296 | 1.069456  |
| 32 | 6  | 0 | 1.237696  | -5.149917 | -0.237526 |
| 33 | 6  | 0 | 0.283820  | -4.859594 | -1.213273 |
| 34 | 6  | 0 | -0.899330 | -4.166808 | -0.926621 |
| 35 | 6  | 0 | 0.404745  | 3.756738  | -2.612768 |
| 36 | 6  | 0 | 0.232432  | 5.056060  | -3.428595 |
| 37 | 6  | 0 | 1.646604  | 2.999071  | -3.118447 |
| 38 | 6  | 0 | -1.632567 | 3.902429  | 2.159751  |
| 39 | 6  | 0 | -1.195222 | 3.004481  | 3.332843  |
| 40 | 6  | 0 | -2.181465 | 5.251583  | 2.666873  |
| 41 | 6  | 0 | -0.372615 | -3.646783 | 2.885997  |
| 42 | 6  | 0 | -0.664233 | -4.896108 | 3.743350  |
| 43 | 6  | 0 | 0.824177  | -2.872292 | 3.470649  |
| 44 | 6  | 0 | -1.917346 | -3.990449 | -2.054328 |
| 45 | 6  | 0 | -1.342159 | -3.224774 | -3.260301 |
| 46 | 6  | 0 | -2.492900 | -5.354076 | -2.488798 |
| 47 | 6  | 0 | 2.507057  | -5.913655 | -0.591035 |
| 48 | 6  | 0 | 3.781889  | -5.198269 | -0.106587 |
| 49 | 6  | 0 | 2.455499  | -7.361553 | -0.064405 |
| 50 | 6  | 0 | 2.972988  | 5.752314  | 1.239305  |
| 51 | 6  | 0 | 2.661869  | 7.209058  | 1.635326  |
| 52 | 6  | 0 | 3.661451  | 5.006730  | 2.397178  |
| 53 | 6  | 0 | -6.691584 | 1.422428  | 0.538078  |
| 54 | 6  | 0 | -6.756406 | -0.610765 | -1.051961 |
| 55 | 6  | 0 | -7.579216 | 0.464471  | -0.297305 |
| 56 | 1  | 0 | -5.620222 | -0.239655 | 2.986903  |
| 57 | 1  | 0 | -6.712566 | -0.876953 | 1.774248  |
| 58 | 1  | 0 | -4.824439 | 1.469677  | 1.617338  |
| 59 | 1  | 0 | -4.821674 | -0.913800 | -1.959965 |
| 60 | 1  | 0 | -5.224901 | 0.907718  | -3.358255 |
| 61 | 1  | 0 | -6.342760 | 1.674222  | -2.247692 |
| 62 | 1  | 0 | -3.128657 | -4.474316 | 2.057196  |
| 63 | 1  | 0 | -5.056589 | -3.141807 | 2.862132  |
| 64 | 1  | 0 | -4.324072 | 3.731282  | -3.073188 |
| 65 | 1  | 0 | -2.341559 | 4.789179  | -2.029195 |
| 66 | 1  | 0 | 1.393543  | 0.038013  | -1.491319 |
| 67 | 1  | 0 | 0.729287  | 5.012872  | 2.641992  |
| 68 | 1  | 0 | 2.403586  | 4.921266  | -1.284048 |
| 69 | 1  | 0 | 1.688033  | -4.967732 | 1.849970  |
| 70 | 1  | 0 | 0.460296  | -5.200929 | -2.231587 |
| 71 | 1  | 0 | -0.456407 | 3.113812  | -2.808554 |
| 72 | 1  | 0 | 0.146374  | 4.829464  | -4.498467 |
| 73 | 1  | 0 | -0.658699 | 5.617692  | -3.129922 |
| 74 | 1  | 0 | 1.095687  | 5.719874  | -3.296057 |
| 75 | 1  | 0 | 1.525079  | 2.757508  | -4.181615 |
| 76 | 1  | 0 | 1.791652  | 2.063111  | -2.576004 |
| 77 | 1  | 0 | 2.560917  | 3.598053  | -3.026706 |
| 78 | 1  | 0 | -2.460300 | 3.396809  | 1.657964  |
| 79 | 1  | 0 | -0.398835 | 3.472687  | 3.924021  |
| 80 | 1  | 0 | -2.040962 | 2.823594  | 4.007744  |
| 81 | 1  | 0 | -0.833629 | 2.037734  | 2.971425  |
| 82 | 1  | 0 | -2.530805 | 5.875620  | 1.836485  |
| 83 | 1  | 0 | -1.418358 | 5.819375  | 3.212375  |
| 84 | 1  | 0 | -3.025467 | 5.089583  | 3.348627  |
| 85 | 1  | 0 | -1.236044 | -2.982264 | 2.960513  |

TS-2nd-(S)-reaction pathway: S-re/(S)-1ga (Cy-SPINOL)

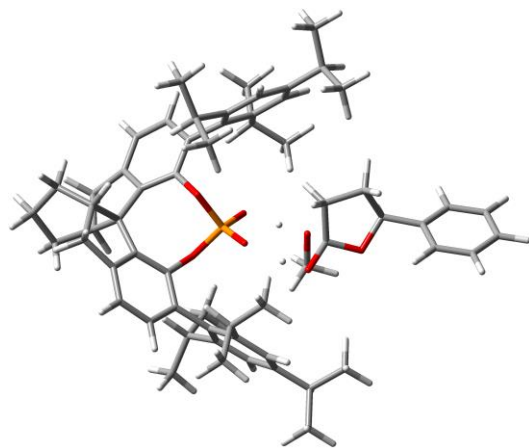

B3LYP/6-31G(d); E(B3LYP) = -3238.937365 hartree

Zero-point Energy Correction = 1.261248 hartree

Thermal Correction to Energy = 1.329408 hartree

Thermal correction to Enthalpy = 1.330352 hartree

Thermal correction to Gibbs Free Energy = 1.155028 hartree

Sum of electronic and Zero-point Energies = -3237.676117 hartree

Sum of electronic and thermal Energies = -3237.607957 hartree

Sum of electronic and thermal Enthalpies = -3237.607013 hartree

Sum of electronic and thermal Free Energies = -3237.782338 hartree

The number of Imaginary frequencies = 1

| Center Number | Atomic Number | Atomic Type | Coordinates (Angstroms) |           |           |
|---------------|---------------|-------------|-------------------------|-----------|-----------|
|               |               |             | X                       | Y         | Z         |
| 1             | 6             | 0           | -5.696365               | -0.491521 | 1.921284  |
| 2             | 6             | 0           | -5.404832               | 0.748694  | 1.029549  |
| 3             | 6             | 0           | -3.838285               | -1.001783 | 0.493893  |
| 4             | 6             | 0           | -4.646113               | -1.495097 | 1.526666  |
| 5             | 6             | 0           | -5.348325               | -0.122606 | -1.413582 |
| 6             | 6             | 0           | -5.377825               | 1.156481  | -2.300166 |
| 7             | 6             | 0           | -4.246938               | 2.004011  | -1.779099 |
| 8             | 6             | 0           | -3.601628               | 1.376814  | -0.704649 |
| 9             | 6             | 0           | -4.460146               | 0.239623  | -0.146474 |
| 10            | 6             | 0           | -2.664851               | -1.693758 | 0.181525  |
| 11            | 6             | 0           | -2.380597               | -2.959004 | 0.733414  |
| 12            | 6             | 0           | -3.308049               | -3.484607 | 1.648896  |
| 13            | 6             | 0           | -4.404720               | -2.746067 | 2.087029  |
| 14            | 6             | 0           | -3.799039               | 3.228882  | -2.264330 |
| 15            | 6             | 0           | -2.666992               | 3.809302  | -1.695910 |
| 16            | 6             | 0           | -1.892401               | 3.134915  | -0.737476 |

---

|     |   |   |           |           |           |
|-----|---|---|-----------|-----------|-----------|
| 86  | 1 | 0 | -0.857216 | -4.611246 | 4.784939  |
| 87  | 1 | 0 | -1.535253 | -5.450542 | 3.376637  |
| 88  | 1 | 0 | 0.187869  | -5.586562 | 3.738528  |
| 89  | 1 | 0 | 0.624613  | -2.622661 | 4.520255  |
| 90  | 1 | 0 | 0.984882  | -1.940087 | 2.925959  |
| 91  | 1 | 0 | 1.750423  | -3.458061 | 3.444255  |
| 92  | 1 | 0 | -2.755062 | -3.403252 | -1.670777 |
| 93  | 1 | 0 | -2.116553 | -3.082145 | -4.024278 |
| 94  | 1 | 0 | -0.978770 | -2.238331 | -2.958012 |
| 95  | 1 | 0 | -0.516200 | -3.771926 | -3.731553 |
| 96  | 1 | 0 | -3.266891 | -5.218754 | -3.254451 |
| 97  | 1 | 0 | -2.942621 | -5.882140 | -1.640473 |
| 98  | 1 | 0 | -1.715921 | -6.002781 | -2.910565 |
| 99  | 1 | 0 | 4.675289  | -5.715534 | -0.477099 |
| 100 | 1 | 0 | 3.814775  | -4.158279 | -0.446725 |
| 101 | 1 | 0 | 3.840286  | -5.185338 | 0.988187  |
| 102 | 1 | 0 | 3.350172  | -7.919380 | -0.367642 |
| 103 | 1 | 0 | 1.576145  | -7.891445 | -0.446995 |
| 104 | 1 | 0 | 2.404658  | -7.379123 | 1.031020  |
| 105 | 1 | 0 | 3.575760  | 7.733842  | 1.939636  |
| 106 | 1 | 0 | 2.213560  | 7.758235  | 0.800274  |
| 107 | 1 | 0 | 1.957894  | 7.247208  | 2.475089  |
| 108 | 1 | 0 | 4.586523  | 5.517801  | 2.689810  |
| 109 | 1 | 0 | 3.915052  | 3.978749  | 2.114954  |
| 110 | 1 | 0 | 3.016392  | 4.957789  | 3.282109  |
| 111 | 1 | 0 | -7.256919 | 1.795838  | 1.401550  |
| 112 | 1 | 0 | -6.426980 | 2.308862  | -0.049804 |
| 113 | 1 | 0 | -7.283881 | -0.908639 | -1.967133 |
| 114 | 1 | 0 | -6.672033 | -1.521208 | -0.447046 |
| 115 | 1 | 0 | -8.172621 | 1.054578  | -1.005638 |
| 116 | 1 | 0 | -8.310421 | -0.035042 | 0.349025  |
| 117 | 6 | 0 | 3.108004  | -0.578276 | -0.081366 |
| 118 | 8 | 0 | 4.384394  | -0.897233 | -0.387269 |
| 119 | 8 | 0 | 2.417956  | -0.285117 | -1.647893 |
| 120 | 6 | 0 | 5.144899  | 0.333180  | -0.572487 |
| 121 | 6 | 0 | 4.508123  | 1.296846  | 0.451268  |
| 122 | 6 | 0 | 3.041830  | 0.828242  | 0.528894  |
| 123 | 1 | 0 | 4.951762  | 0.687552  | -1.591864 |
| 124 | 1 | 0 | 5.008924  | 1.181053  | 1.417452  |
| 125 | 1 | 0 | 4.609514  | 2.339306  | 0.139667  |
| 126 | 1 | 0 | 2.667381  | 0.751947  | 1.551901  |
| 127 | 1 | 0 | 2.359261  | 1.475872  | -0.022260 |
| 128 | 8 | 0 | 2.452079  | -1.598304 | 0.423359  |
| 129 | 6 | 0 | 2.410247  | -1.450268 | -2.497652 |
| 130 | 1 | 0 | 1.866900  | -2.272995 | -2.025208 |
| 131 | 1 | 0 | 1.927647  | -1.164889 | -3.435007 |
| 132 | 1 | 0 | 3.446685  | -1.738028 | -2.678842 |
| 133 | 1 | 0 | 1.523607  | -1.296906 | 0.725638  |
| 134 | 6 | 0 | 6.614408  | 0.053471  | -0.391842 |
| 135 | 6 | 0 | 7.547536  | 0.683810  | -1.221435 |
| 136 | 6 | 0 | 7.068407  | -0.794786 | 0.626507  |
| 137 | 6 | 0 | 8.915793  | 0.483423  | -1.030717 |
| 138 | 1 | 0 | 7.202738  | 1.333963  | -2.022708 |
| 139 | 6 | 0 | 8.434350  | -1.004250 | 0.809818  |
| 140 | 1 | 0 | 6.347320  | -1.303935 | 1.259048  |
| 141 | 6 | 0 | 9.361822  | -0.362353 | -0.014817 |
| 142 | 1 | 0 | 9.630166  | 0.980235  | -1.681571 |
| 143 | 1 | 0 | 8.775731  | -1.671378 | 1.596774  |
| 144 | 1 | 0 | 10.426122 | -0.526126 | 0.130780  |
| 145 | 1 | 0 | 2.554467  | -5.966661 | -1.687983 |
| 146 | 1 | 0 | 3.682582  | 5.785774  | 0.400501  |

---

## 14. Structural Properties of CPA Candidates in Transitions States

### Structural properties in transitions states

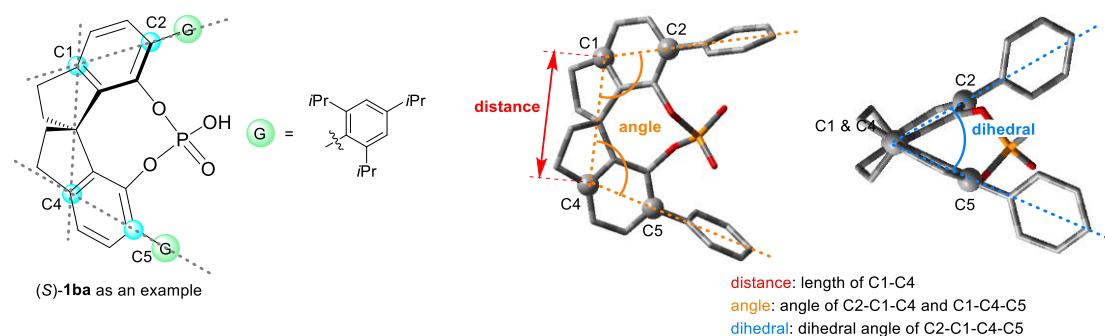

### Structural Properties of SPINOL-derived CPA (S)-1ba in Transitions States

| 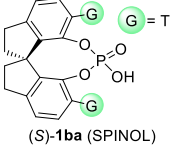<br>(S)-1ba (SPINOL) | optimized structure | <i>R-anti</i> | <i>R-re</i> | <i>S-anti</i> | <i>S-si</i> | <i>S-syn</i> | <i>S-re</i> |
|-------------------------------------------------------------------------------------------------------|---------------------|---------------|-------------|---------------|-------------|--------------|-------------|
| distance (Å)                                                                                          | 4.78                | 4.78          | 4.78        | 4.77          | 4.77        | 4.78         | 4.78        |
| angle 1                                                                                               | 100.3°              | 100.0°        | 99.4°       | 100.6°        | 100.2°      | 100.3°       | 99.6°       |
| angle 2                                                                                               | 99.0°               | 99.0°         | 100.0°      | 100.4°        | 99.7°       | 98.7°        | 99.9°       |
| dihedral angle                                                                                        | 61.2°               | 60.9°         | 58.8°       | 58.0°         | 59.9°       | 61.4°        | 58.8°       |
| $\Delta\Delta G^\ddagger$ (kcal/mol)                                                                  | --                  | -2.03         | 0.00        | 1.98          | 0.55        | 1.31         | -0.37       |

### Structural Properties of SPHENOL-derived CPA (S)-1ca in Transitions States

| 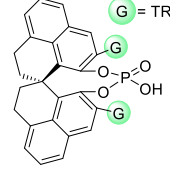<br>(S)-1ca (SPHENOL) | optimized structure | <i>R-anti</i> | <i>R-re</i> | <i>S-anti</i> | <i>S-si</i> | <i>S-syn</i> | <i>S-re</i> |
|----------------------------------------------------------------------------------------------------------|---------------------|---------------|-------------|---------------|-------------|--------------|-------------|
| distance (Å)                                                                                             | 5.13                | 5.12          | 5.12        | 5.10          | 5.11        | 5.12         | 5.12        |
| angle 1                                                                                                  | 94.2°               | 93.3°         | 93.6°       | 94.4°         | 94.5°       | 94.4°        | 94.5°       |
| angle 2                                                                                                  | 93.0°               | 94.4°         | 94.6°       | 95.0°         | 93.5°       | 92.3°        | 93.7°       |
| dihedral angle                                                                                           | 61.8°               | 64.7°         | 62.4°       | 62.9°         | 64.9°       | 66.0°        | 62.4°       |
| $\Delta\Delta G^\ddagger$ (kcal/mol)                                                                     | --                  | -2.30         | 0.00        | 3.20          | 2.51        | 1.14         | -0.22       |

### Structural Properties of Oxa-SPINOL-derived CPA (S)-1da in Transitions States

| 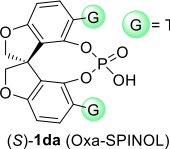<br>(S)-1da (Oxa-SPINOL) | optimized structure | <i>R-anti</i> | <i>R-re</i> | <i>S-anti</i> | <i>S-si</i> | <i>S-syn</i> | <i>S-re</i> |
|-------------------------------------------------------------------------------------------------------------|---------------------|---------------|-------------|---------------|-------------|--------------|-------------|
| distance (Å)                                                                                                | 4.67                | 4.66          | 4.67        | 4.65          | 4.66        | 4.66         | 4.67        |
| angle 1                                                                                                     | 102.2°              | 101.7°        | 101.8°      | 103.0°        | 102.5°      | 102.6°       | 101.9°      |
| angle 2                                                                                                     | 101.3°              | 102.2°        | 102.2°      | 102.4°        | 102.0°      | 101.3°       | 102.1°      |
| dihedral angle                                                                                              | 55.7°               | 58.5°         | 56.9°       | 56.0°         | 57.8°       | 59.0°        | 56.9        |
| $\Delta\Delta G^\ddagger$ (kcal/mol)                                                                        | --                  | -2.08         | 0.00        | 1.95          | 1.13        | 1.79         | -0.12       |

**Structural Properties of SPISOL-derived CPA (S)-1ea in Transitions States**

| 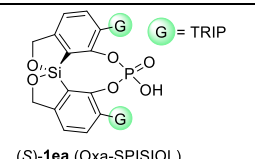<br>(S)-1ea (Oxa-SPISOL) | optimized structure | <i>R-anti</i> | <i>R-re</i> | <i>S-anti</i> | <i>S-si</i> | <i>S-syn</i> | <i>S-re</i> |
|-----------------------------------------------------------------------------------------------------------|---------------------|---------------|-------------|---------------|-------------|--------------|-------------|
| distance (Å)                                                                                              | 5.26                | 5.24          | 5.25        | 5.23          | 5.23        | 5.24         | 5.25        |
| angle 1                                                                                                   | 98.8°               | 98.1°         | 99.1°       | 99.4°         | 99.3°       | 99.7°        | 98.4°       |
| angle 2                                                                                                   | 97.8°               | 99.1°         | 98.4°       | 100.2°        | 99.0°       | 97.6°        | 99.0°       |
| dihedral angle                                                                                            | 50.6°               | 54.8°         | 52.7°       | 50.8°         | 54.0°       | 55.3°        | 52.5°       |
| $\Delta\Delta G^\ddagger$ (kcal/mol)                                                                      | --                  | -2.08         | 0.00        | 1.40          | 1.34        | 1.81         | -0.43       |

**Structural Properties of SBIDOL-derived CPA (S)-1fa in Transitions States**

| 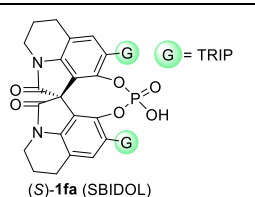<br>(S)-1fa (SBIDOL) | optimized structure | <i>R-anti</i> | <i>R-re</i> | <i>S-anti</i> | <i>S-si</i> | <i>S-syn</i> | <i>S-re</i> |
|-------------------------------------------------------------------------------------------------------|---------------------|---------------|-------------|---------------|-------------|--------------|-------------|
| distance (Å)                                                                                          | 4.68                | 4.67          | 4.67        | 4.66          | 4.66        | 4.67         | 4.67        |
| angle 1                                                                                               | 101.7°              | 101.6°        | 101.3°      | 101.7°        | 101.9°      | 102.2°       | 101.4°      |
| angle 2                                                                                               | 100.9°              | 101.0°        | 101.9°      | 102.1°        | 101.3°      | 100.7°       | 101.6°      |
| dihedral angle                                                                                        | 57.2°               | 60.7°         | 58.2°       | 60.4°         | 60.4°       | 60.8°        | 58.7°       |
| $\Delta\Delta G^\ddagger$ (kcal/mol)                                                                  | --                  | -2.84         | 0.00        | 0.73          | 0.25        | 1.42         | -0.42       |

**Structural Properties of Cy-SPINOL-derived CPA (S)-1ga in Transitions States**

| 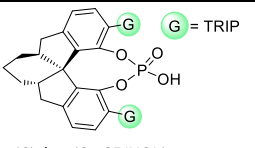<br>(S)-1ga (Cy-SPINOL) | optimized structure | <i>R-anti</i> | <i>R-re</i> | <i>S-anti</i> | <i>S-si</i> | <i>S-syn</i> | <i>S-re</i> |
|------------------------------------------------------------------------------------------------------------|---------------------|---------------|-------------|---------------|-------------|--------------|-------------|
| distance (Å)                                                                                               | 4.84                | 4.83          | 4.83        | 4.82          | 4.82        | 4.83         | 4.83        |
| angle 1                                                                                                    | 96.7°               | 96.7°         | 96.1°       | 96.5°         | 96.9°       | 95.2°        | 96.1°       |
| angle 2                                                                                                    | 95.6°               | 95.7°         | 96.8°       | 97.2°         | 95.8°       | 97.0°        | 96.7°       |
| dihedral angle                                                                                             | 66.9°               | 69.7°         | 67.7°       | 68.9°         | 70.0°       | 70.8°        | 67.9°       |
| $\Delta\Delta G^\ddagger$ (kcal/mol)                                                                       | --                  | -1.51         | 0.00        | 3.13          | 1.31        | 1.83         | -0.21       |

## Vibrational frequency analysis of carbonyl groups of SBIDOL-derived CPA (*S*)-1fa in transition states

Contrary to our expectations based on the structural similarity of free catalysts, SBIDOL-derived CPA (*S*)-1fa exhibited significantly lower  $\Delta\Delta G^\ddagger$  in the TS of *S-anti* and *S-si* compared to Oxa-SPINOL-derived CPA (*S*)-1da having similar structural parameters. To clarify the structural feature of (*S*)-1fa, the following considerations were made regarding the destabilization factors of the TSs. We believed that the distortion energy in the TSs of (*S*)-1fa has the most significant impact on the relatively flexible amide bond site of the SBIDOL backbone, rather than aromatic regions. As a result, the extent of this strain should be represented by the frequencies of normal mode vibrations. Specifically, when torsional strain is applied to the amide site, the double bond character of the conjugated carbonyl bond is restored, resulting in a low-wavenumber shift in the vibrational frequency of carbonyl groups. To compare the frequencies of the asymmetric stretching vibration of carbonyl group in the TS structures calculated by vibrational analysis (B3LYP/6-31G(d), scaled by 0.96), we represent the wavenumber shift based on free (*S*)-1fa (Table S2 & Figure S1). Thus, the relatively large low-wavenumber shift of *R-re*, *S-syn*, and *S-re* implied that their TS structures were destabilized due to the torsional strain of amide. On the other hand, *S-anti* and *S-si* were not significantly influenced in terms of the wavenumber shift. Therefore, these results suggest that the  $\Delta\Delta G^\ddagger$  of *S-anti* and *S-si* are reduced by energetically destabilized *S-re*, while *R-re* and *S-syn* are offset by the similar tendency of destabilization. The above discussion is consistent with the calculated values of  $\Delta\Delta G^\ddagger$ .

Table S2

|               | shift (cm <sup>-1</sup> ) | ir int |      | freq    | scaled by 0.96 | $\Delta\Delta G^\ddagger$ (kcal/mol) |
|---------------|---------------------------|--------|------|---------|----------------|--------------------------------------|
| free SBIDOL   | 0.0                       | 561    | asym | 1823.42 | 1750.5         | --                                   |
| <i>R-anti</i> | -0.6                      | 563    | asym | 1822.84 | 1749.9         | -2.84                                |
| <i>R-re</i>   | <b>-2.2</b>               | 564    | asym | 1821.12 | 1748.3         | <b>0.00</b> (RDS)                    |
| <i>S-anti</i> | 0.3                       | 570    | asym | 1823.78 | 1750.8         | <b>0.73</b> (RDS)                    |
| <i>S-si</i>   | -0.3                      | 565    | asym | 1823.14 | 1750.2         | 0.25                                 |
| <i>S-syn</i>  | <b>-1.5</b>               | 559    | asym | 1821.82 | 1748.9         | 1.42                                 |
| <i>S-re</i>   | <b>-1.8</b>               | 539    | asym | 1821.58 | 1748.7         | -0.42                                |

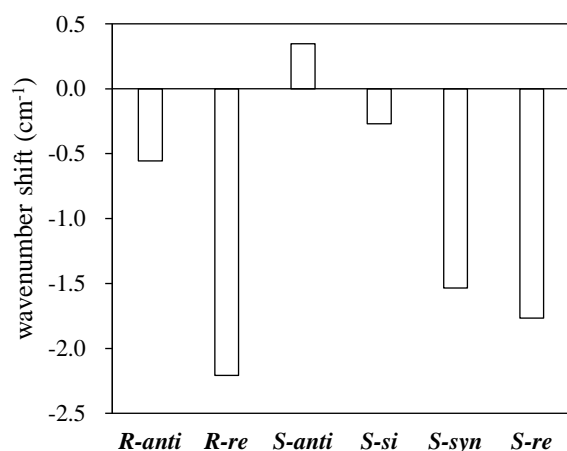

Figure S1

## 15. DFT Calculation of Cy-SPINOL-derived CPAs Having Bulky Substituents

### Optimized structure of Cy-SPINOL-derived CPA (S)-1gd

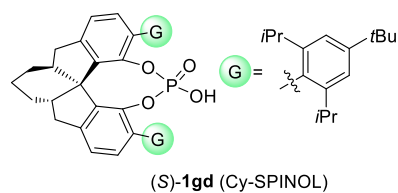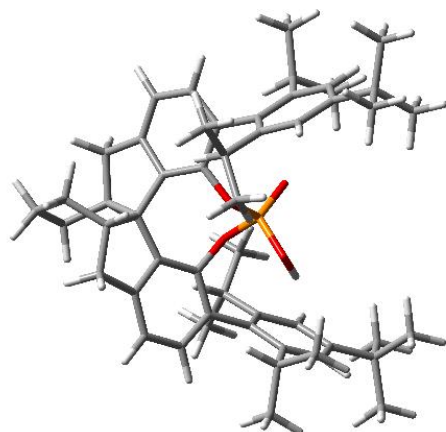

B3LYP/6-31G(d); E(RB3LYP) = -2664.27963553 Hartree  
 Zero-point correction= 1.083112 Hartree  
 Thermal correction to Energy= 1.140129 Hartree  
 Thermal correction to Enthalpy= 1.141073 Hartree  
 Thermal correction to Gibbs Free Energy= 0.993568 Hartree  
 Sum of electronic and zero-point Energies= -2663.196524 Hartree  
 Sum of electronic and thermal Energies= -2663.139506 Hartree  
 Sum of electronic and thermal Enthalpies= -2663.138562 Hartree  
 Sum of electronic and thermal Free Energies= -2663.286068 Hartree  
 The number of Imaginary frequencies = 0

| Center Number | Atomic Number | Atomic Type | Coordinates (Angstroms) |           |           |
|---------------|---------------|-------------|-------------------------|-----------|-----------|
|               |               |             | X                       | Y         | Z         |
| 1             | 6             | 0           | 0.778903                | 4.422045  | -2.153480 |
| 2             | 6             | 0           | -0.451107               | 4.267027  | -1.215124 |
| 3             | 6             | 0           | 1.220773                | 2.643004  | -0.608649 |
| 4             | 6             | 0           | 1.719385                | 3.328438  | -1.724576 |
| 5             | 6             | 0           | 0.466884                | 4.325992  | 1.213860  |
| 6             | 6             | 0           | -0.792339               | 4.481890  | 2.116141  |
| 7             | 6             | 0           | -1.705868               | 3.362297  | 1.689576  |
| 8             | 6             | 0           | -1.135060               | 2.618521  | 0.647782  |
| 9             | 6             | 0           | 0.034035                | 3.379006  | 0.015001  |
| 10            | 6             | 0           | 1.853398                | 1.457994  | -0.231515 |
| 11            | 6             | 0           | 3.050728                | 1.019687  | -0.830794 |
| 12            | 6             | 0           | 3.589789                | 1.823057  | -1.848477 |
| 13            | 6             | 0           | 2.915222                | 2.944964  | -2.325651 |
| 14            | 6             | 0           | -2.935036               | 3.000453  | 2.233816  |
| 15            | 6             | 0           | -3.584556               | 1.864402  | 1.754170  |
| 16            | 6             | 0           | -2.976306               | 1.002477  | 0.826249  |
| 17            | 6             | 0           | -1.721599               | 1.391709  | 0.323860  |
| 18            | 8             | 0           | -0.997444               | 0.490158  | -0.480339 |
| 19            | 8             | 0           | 1.267624                | 0.667076  | 0.760827  |
| 20            | 15            | 0           | 0.090438                | -0.383995 | 0.350353  |
| 21            | 8             | 0           | 0.651851                | -1.226465 | -0.894480 |
| 22            | 8             | 0           | -0.358396               | -1.110430 | 1.549933  |
| 23            | 6             | 0           | 3.704209                | -0.274234 | -0.435716 |

|    |   |   |           |           |           |
|----|---|---|-----------|-----------|-----------|
| 24 | 6 | 0 | -3.668040 | -0.258311 | 0.394788  |
| 25 | 6 | 0 | -4.116933 | -0.396492 | -0.939701 |
| 26 | 6 | 0 | -4.805962 | -1.557305 | -1.315706 |
| 27 | 6 | 0 | -5.080655 | -2.592500 | -0.421865 |
| 28 | 6 | 0 | -4.634164 | -2.425312 | 0.893792  |
| 29 | 6 | 0 | -3.934929 | -1.295664 | 1.326655  |
| 30 | 6 | 0 | 3.822498  | -1.343031 | -1.373477 |
| 31 | 6 | 0 | 4.400237  | -2.546951 | -0.953954 |
| 32 | 6 | 0 | 4.887195  | -2.752867 | 0.342532  |
| 33 | 6 | 0 | 4.790307  | -1.678529 | 1.227265  |
| 34 | 6 | 0 | 4.214885  | -0.450759 | 0.872898  |
| 35 | 6 | 0 | -3.509416 | -1.235351 | 2.796091  |
| 36 | 6 | 0 | -4.726372 | -1.009946 | 3.717565  |
| 37 | 6 | 0 | -2.731091 | -2.487769 | 3.243072  |
| 38 | 6 | 0 | -3.929134 | 0.689470  | -2.000648 |
| 39 | 6 | 0 | -3.102395 | 0.190308  | -3.201211 |
| 40 | 6 | 0 | -5.283811 | 1.264972  | -2.460414 |
| 41 | 6 | 0 | 3.406743  | -1.225152 | -2.846775 |
| 42 | 6 | 0 | 4.653900  | -1.076047 | -3.744712 |
| 43 | 6 | 0 | 2.546821  | -2.400414 | -3.354185 |
| 44 | 6 | 0 | 4.227262  | 0.667999  | 1.915338  |
| 45 | 6 | 0 | 3.518344  | 0.267705  | 3.223086  |
| 46 | 6 | 0 | 5.669973  | 1.140935  | 2.188676  |
| 47 | 6 | 0 | 5.500427  | -4.110691 | 0.730748  |
| 48 | 6 | 0 | 4.439858  | -5.222640 | 0.548124  |
| 49 | 6 | 0 | 6.716126  | -4.407543 | -0.179327 |
| 50 | 6 | 0 | -5.835760 | -3.872879 | -0.823996 |
| 51 | 6 | 0 | -4.926904 | -5.101970 | -0.584090 |
| 52 | 6 | 0 | -7.116325 | -4.008883 | 0.033552  |
| 53 | 6 | 0 | -1.038807 | 5.621374  | -0.801631 |
| 54 | 6 | 0 | 1.024533  | 5.677250  | 0.751035  |
| 55 | 6 | 0 | -0.015424 | 6.506456  | -0.045236 |
| 56 | 1 | 0 | 0.492354  | 4.308295  | -3.206632 |
| 57 | 1 | 0 | 1.239025  | 5.413995  | -2.070148 |
| 58 | 1 | 0 | -1.218057 | 3.689305  | -1.744292 |
| 59 | 1 | 0 | 1.237853  | 3.793362  | 1.782910  |
| 60 | 1 | 0 | -0.530410 | 4.389671  | 3.177853  |
| 61 | 1 | 0 | -1.261907 | 5.466279  | 2.005068  |
| 62 | 1 | 0 | 4.532060  | 1.529601  | -2.299760 |
| 63 | 1 | 0 | 3.314509  | 3.503813  | -3.168375 |
| 64 | 1 | 0 | -3.387073 | 3.595079  | 3.023868  |
| 65 | 1 | 0 | -4.564704 | 1.600605  | 2.138247  |
| 66 | 1 | 0 | -5.140009 | -1.636848 | -2.344017 |
| 67 | 1 | 0 | -4.830831 | -3.209346 | 1.618895  |
| 68 | 1 | 0 | 4.480295  | -3.352005 | -1.677895 |
| 69 | 1 | 0 | 5.172945  | -1.783390 | 2.235713  |
| 70 | 1 | 0 | -2.830426 | -0.387890 | 2.918367  |
| 71 | 1 | 0 | -4.405048 | -0.920643 | 4.762599  |
| 72 | 1 | 0 | -5.280060 | -0.101356 | 3.455624  |
| 73 | 1 | 0 | -5.428842 | -1.850161 | 3.655374  |
| 74 | 1 | 0 | -2.388440 | -2.359460 | 4.277286  |
| 75 | 1 | 0 | -1.853824 | -2.641214 | 2.611938  |
| 76 | 1 | 0 | -3.353424 | -3.390555 | 3.216916  |
| 77 | 1 | 0 | -3.374753 | 1.517399  | -1.550986 |
| 78 | 1 | 0 | -3.616134 | -0.616259 | -3.737785 |
| 79 | 1 | 0 | -2.936071 | 1.006528  | -3.915503 |
| 80 | 1 | 0 | -2.127738 | -0.184989 | -2.875613 |
| 81 | 1 | 0 | -5.854744 | 1.659577  | -1.612409 |
| 82 | 1 | 0 | -5.900610 | 0.503128  | -2.951370 |
| 83 | 1 | 0 | -5.130730 | 2.081184  | -3.177355 |
| 84 | 1 | 0 | 2.803816  | -0.320605 | -2.959895 |
| 85 | 1 | 0 | 4.358909  | -0.916527 | -4.788784 |
| 86 | 1 | 0 | 5.283292  | -0.234428 | -3.437192 |
| 87 | 1 | 0 | 5.274101  | -1.979566 | -3.705365 |
| 88 | 1 | 0 | 2.260626  | -2.220540 | -4.396979 |
| 89 | 1 | 0 | 1.624392  | -2.515074 | -2.778022 |
| 90 | 1 | 0 | 3.088632  | -3.352713 | -3.328284 |
| 91 | 1 | 0 | 3.687699  | 1.524564  | 1.504329  |
| 92 | 1 | 0 | 3.487661  | 1.122078  | 3.910109  |

|     |   |   |           |           |           |     |   |   |           |           |           |
|-----|---|---|-----------|-----------|-----------|-----|---|---|-----------|-----------|-----------|
| 93  | 1 | 0 | 2.490787  | -0.054885 | 3.033146  | 110 | 1 | 0 | -1.396846 | 6.147114  | -1.695891 |
| 94  | 1 | 0 | 4.043718  | -0.545318 | 3.738231  | 111 | 1 | 0 | -1.926852 | 5.449189  | -0.182978 |
| 95  | 1 | 0 | 5.669704  | 1.978319  | 2.896890  | 112 | 1 | 0 | 1.365675  | 6.247239  | 1.624428  |
| 96  | 1 | 0 | 6.160784  | 1.474715  | 1.267484  | 113 | 1 | 0 | 1.919684  | 5.501720  | 0.142504  |
| 97  | 1 | 0 | 6.280627  | 0.339303  | 2.620832  | 114 | 1 | 0 | -0.557481 | 7.181103  | 0.627559  |
| 98  | 1 | 0 | 4.862086  | -6.199125 | 0.815132  | 115 | 1 | 0 | 0.513163  | 7.160590  | -0.748470 |
| 99  | 1 | 0 | 3.568783  | -5.042983 | 1.188418  | 116 | 1 | 0 | 1.522435  | -1.622703 | -0.696306 |
| 100 | 1 | 0 | 4.087082  | -5.284621 | -0.486716 | 117 | 6 | 0 | -6.252597 | -3.869021 | -2.307046 |
| 101 | 1 | 0 | 7.159868  | -5.375923 | 0.082258  | 118 | 6 | 0 | 5.979098  | -4.141210 | 2.194654  |
| 102 | 1 | 0 | 7.488416  | -3.638161 | -0.065559 | 119 | 1 | 0 | 6.401354  | -5.126187 | 2.423315  |
| 103 | 1 | 0 | 6.435716  | -4.445678 | -1.237180 | 120 | 1 | 0 | 5.156771  | -3.963529 | 2.896770  |
| 104 | 1 | 0 | -5.451821 | -6.025531 | -0.858985 | 121 | 1 | 0 | 6.759835  | -3.395951 | 2.385077  |
| 105 | 1 | 0 | -4.013972 | -5.036455 | -1.186869 | 122 | 1 | 0 | -6.924782 | -3.035189 | -2.539892 |
| 106 | 1 | 0 | -4.626751 | -5.187548 | 0.465286  | 123 | 1 | 0 | -6.784240 | -4.797870 | -2.543753 |
| 107 | 1 | 0 | -7.661624 | -4.922221 | -0.235415 | 124 | 1 | 0 | -5.385368 | -3.805592 | -2.974075 |
| 108 | 1 | 0 | -7.785212 | -3.154833 | -0.123643 |     |   |   |           |           |           |
| 109 | 1 | 0 | -6.887167 | -4.060458 | 1.102941  |     |   |   |           |           |           |

#### DFT calculation for all conformations of real system using Cy-SPINOL-derived CPA (*S*)-Igd\*

| TS            | Orientation I | Orientation II | G <sup>‡</sup> (a.u.) | ΔΔG <sup>‡</sup> (kcal/mmol) |
|---------------|---------------|----------------|-----------------------|------------------------------|
| <i>R-anti</i> | up            | up             |                       | --                           |
|               | up            | down           |                       | --                           |
|               | down          | up             | -3316.351047          | -2.59                        |
|               | down          | down           | -3316.350679          | -2.36                        |
| <i>S-anti</i> | up            | up             | -3316.341215          | 3.58                         |
|               | up            | down           | -3316.341395          | 3.46                         |
|               | down          | up             |                       | --                           |
|               | down          | down           |                       | --                           |
| <i>S-syn</i>  | up            | up             | -3316.345338          | 0.99                         |
|               | up            | down           | -3316.345224          | 1.06                         |
|               | down          | up             | -3316.345042          | 1.09                         |
|               | down          | down           | -3316.345186          | 1.18                         |

  

| TS          | Orientation I | Orientation II | G <sup>‡</sup> (a.u.) | ΔΔG <sup>‡</sup> (kcal/mmol) |
|-------------|---------------|----------------|-----------------------|------------------------------|
| <i>R-re</i> | up            | up             | -3316.346916          | 0.00                         |
|             | up            | down           | -3316.346450          | 0.29                         |
|             | down          | up             | -3316.346402          | 0.32                         |
|             | down          | down           | -3316.346083          | 0.52                         |
| <i>S-si</i> | up            | up             | -3316.345109          | 1.13                         |
|             | up            | down           |                       | --                           |
|             | down          | up             |                       | --                           |
|             | down          | down           | -3316.344528          | 1.50                         |
| <i>S-re</i> | up            | up             | -3316.347215          | -0.19                        |
|             | up            | down           |                       | --                           |
|             | down          | up             |                       | --                           |
|             | down          | down           |                       | --                           |

\*The TS energies of RDSs, namely, *S-syn* and *R-re*, were fully calculated for conformational isomers, however the TS energies not related to RDSs were partially calculated to reduce computational load. Assignments of “up” and “down” are shown in ESI page S55.

#### DFT calculation of real system using Cy-SPINOL-derived CPA

##### (*S*)-Igd

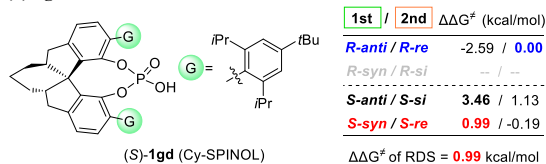

B3LYP/6-31G(d); E(RB3LYP) = -3317.56064374 Hartree

Zero-point correction= 1.316490 Hartree  
 Thermal correction to Energy= 1.386769 Hartree  
 Thermal correction to Enthalpy= 1.387713 Hartree  
 Thermal correction to Gibbs Free Energy= 1.209597 Hartree  
 Sum of electronic and zero-point Energies= -3316.244154 Hartree  
 Sum of electronic and thermal Energies= -3316.173875 Hartree  
 Sum of electronic and thermal Enthalpies= -3316.172931 Hartree  
 Sum of electronic and thermal Free Energies= -3316.351047 Hartree  
 The number of Imaginary frequencies = 1

#### TS-1st(*R*)-reaction pathway: *R-anti*(*S*)-Igd (Cy-SPINOL)

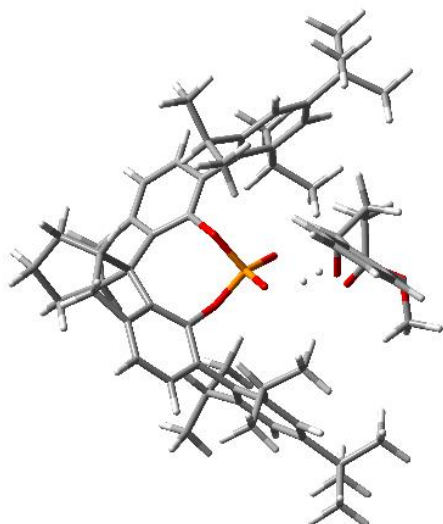

| Center Number | Atomic Number | Atomic Type | Coordinates (Angstroms) |          |           |
|---------------|---------------|-------------|-------------------------|----------|-----------|
|               |               |             | X                       | Y        | Z         |
| 1             | 6             | 0           | -1.137958               | 4.352356 | 3.189138  |
| 2             | 6             | 0           | 0.065029                | 4.580376 | 2.227487  |
| 3             | 6             | 0           | -1.484435               | 3.041084 | 1.213375  |
| 4             | 6             | 0           | -2.026245               | 3.377946 | 2.460441  |
| 5             | 6             | 0           | -1.001414               | 5.231121 | -0.048704 |
| 6             | 6             | 0           | 0.159658                | 5.762254 | -0.935208 |
| 7             | 6             | 0           | 1.192629                | 4.668462 | -0.898157 |
| 8             | 6             | 0           | 0.790444                | 3.618831 | -0.062076 |
| 9             | 6             | 0           | -0.395725               | 4.033961 | 0.808338  |
| 10            | 6             | 0           | -2.032692               | 1.957282 | 0.522664  |
| 11            | 6             | 0           | -3.254320               | 1.373274 | 0.911397  |
| 12            | 6             | 0           | -3.847878               | 1.860082 | 2.088835  |
| 13            | 6             | 0           | -3.216383               | 2.803566 | 2.896621  |
| 14            | 6             | 0           | 2.393800                | 4.604778 | -1.597751 |
| 15            | 6             | 0           | 3.179311                | 3.461030 | -1.487505 |
| 16            | 6             | 0           | 2.744123                | 2.326230 | -0.781020 |
| 17            | 6             | 0           | 1.515186                | 2.423261 | -0.099184 |



|    |    |   |           |           |           |     |   |   |           |           |           |
|----|----|---|-----------|-----------|-----------|-----|---|---|-----------|-----------|-----------|
| 18 | 8  | 0 | 0.992145  | 1.303496  | 0.551286  | 87  | 1 | 0 | -5.714752 | -2.185630 | 2.763232  |
| 19 | 8  | 0 | -1.336013 | 1.433500  | -0.570490 | 88  | 1 | 0 | -2.664381 | -2.868591 | 3.194090  |
| 20 | 15 | 0 | -0.108805 | 0.396868  | -0.261937 | 89  | 1 | 0 | -2.182970 | -2.698140 | 1.501189  |
| 21 | 8  | 0 | -0.539131 | -0.658150 | 0.757287  | 90  | 1 | 0 | -3.686196 | -3.540305 | 1.921857  |
| 22 | 8  | 0 | 0.415190  | -0.076932 | -1.592039 | 91  | 1 | 0 | -3.655553 | 2.573829  | -1.220941 |
| 23 | 6  | 0 | -3.940737 | 0.299176  | 0.118118  | 92  | 1 | 0 | -3.258195 | 2.796457  | -3.633713 |
| 24 | 6  | 0 | 3.616333  | 1.103758  | -0.773804 | 93  | 1 | 0 | -2.437185 | 1.348767  | -3.016840 |
| 25 | 6  | 0 | 4.234585  | 0.672658  | 0.423335  | 94  | 1 | 0 | -3.943529 | 1.196405  | -3.943341 |
| 26 | 6  | 0 | 5.143331  | -0.395540 | 0.384206  | 95  | 1 | 0 | -5.437302 | 3.594103  | -2.571233 |
| 27 | 6  | 0 | 5.493269  | -1.046192 | -0.800664 | 96  | 1 | 0 | -6.135148 | 2.722197  | -1.191544 |
| 28 | 6  | 0 | 4.857479  | -0.608053 | -1.969159 | 97  | 1 | 0 | -6.209002 | 2.019639  | -2.814669 |
| 29 | 6  | 0 | 3.929113  | 0.437431  | -1.989616 | 98  | 1 | 0 | -5.805785 | -4.830792 | -2.773677 |
| 30 | 6  | 0 | -4.217127 | -0.968054 | 0.699126  | 99  | 1 | 0 | -4.349521 | -3.814591 | -2.799107 |
| 31 | 6  | 0 | -4.925108 | -1.914828 | -0.046179 | 100 | 1 | 0 | -4.975124 | -4.432962 | -1.261124 |
| 32 | 6  | 0 | -5.374558 | -1.681640 | -1.350784 | 101 | 1 | 0 | -7.997684 | -3.916476 | -1.851484 |
| 33 | 6  | 0 | -5.091305 | -0.430306 | -1.897348 | 102 | 1 | 0 | -8.088352 | -2.256656 | -1.228505 |
| 34 | 6  | 0 | -4.395266 | 0.563818  | -1.196116 | 103 | 1 | 0 | -7.213280 | -3.497315 | -0.320252 |
| 35 | 6  | 0 | 3.324204  | 0.828723  | -3.341975 | 104 | 1 | 0 | 6.820206  | -4.161670 | -1.660080 |
| 36 | 6  | 0 | 4.382170  | 1.467109  | -4.266329 | 105 | 1 | 0 | 5.196010  | -3.839972 | -1.030019 |
| 37 | 6  | 0 | 2.649105  | -0.355734 | -4.059351 | 106 | 1 | 0 | 5.686825  | -3.182958 | -2.598994 |
| 38 | 6  | 0 | 4.019087  | 1.371096  | 1.767391  | 107 | 1 | 0 | 8.576429  | -2.347737 | -1.734459 |
| 39 | 6  | 0 | 3.403872  | 0.431332  | 2.821446  | 108 | 1 | 0 | 8.199821  | -0.701902 | -1.184469 |
| 40 | 6  | 0 | 5.325446  | 2.006011  | 2.285589  | 109 | 1 | 0 | 7.498083  | -1.314224 | -2.688973 |
| 41 | 6  | 0 | -3.794701 | -1.352229 | 2.120312  | 110 | 1 | 0 | 0.884716  | 6.331306  | 3.193361  |
| 42 | 6  | 0 | -5.008504 | -1.405158 | 3.072026  | 111 | 1 | 0 | 1.379963  | 6.136491  | 1.527000  |
| 43 | 6  | 0 | -3.038622 | -2.692794 | 2.178502  | 112 | 1 | 0 | -2.077416 | 7.093725  | 0.142078  |
| 44 | 6  | 0 | -4.219318 | 1.917155  | -1.887432 | 113 | 1 | 0 | -2.469505 | 5.914441  | 1.372410  |
| 45 | 6  | 0 | -3.415841 | 1.802360  | -3.196913 | 114 | 1 | 0 | -0.167256 | 7.887606  | 1.279877  |
| 46 | 6  | 0 | -5.580767 | 2.600407  | -2.128999 | 115 | 1 | 0 | -1.146953 | 7.393282  | 2.635237  |
| 47 | 6  | 0 | -6.149694 | -2.774885 | -2.109342 | 116 | 6 | 0 | 0.446295  | -3.355818 | -1.264204 |
| 48 | 6  | 0 | -5.265934 | -4.038130 | -2.240466 | 117 | 8 | 0 | 0.094872  | -2.964130 | 0.365124  |
| 49 | 6  | 0 | -7.436535 | -3.132116 | -1.328102 | 118 | 6 | 0 | 1.297274  | -3.147502 | 1.171724  |
| 50 | 6  | 0 | 6.575736  | -2.141269 | -0.869913 | 119 | 6 | 0 | 2.335132  | -3.762229 | 0.209042  |
| 51 | 6  | 0 | 6.033588  | -3.401058 | -1.583898 | 120 | 6 | 0 | 1.956682  | -3.222948 | -1.170062 |
| 52 | 6  | 0 | 7.783288  | -1.592314 | -1.668835 | 121 | 1 | 0 | 1.626722  | -2.146519 | 1.469828  |
| 53 | 6  | 0 | 0.518536  | 6.045092  | 2.199134  | 122 | 1 | 0 | 2.269330  | -4.853997 | 0.224450  |
| 54 | 6  | 0 | -1.634220 | 6.337891  | 0.803007  | 123 | 1 | 0 | 3.347569  | -3.476666 | 0.505889  |
| 55 | 6  | 0 | -0.613791 | 7.007959  | 1.758204  | 124 | 1 | 0 | 2.417372  | -3.781114 | -1.989809 |
| 56 | 1  | 0 | -0.803489 | 3.936277  | 4.148254  | 125 | 1 | 0 | 2.224044  | -2.167560 | -1.273323 |
| 57 | 1  | 0 | -1.657565 | 5.287185  | 3.430373  | 126 | 8 | 0 | -0.275898 | -2.535654 | -2.010190 |
| 58 | 1  | 0 | 0.899767  | 3.951583  | 2.558988  | 127 | 8 | 0 | 0.074080  | -4.647982 | -1.368137 |
| 59 | 1  | 0 | -1.767802 | 4.799990  | -0.703462 | 128 | 6 | 0 | -1.329709 | -4.901073 | -1.563790 |
| 60 | 1  | 0 | -0.179187 | 5.951545  | -1.961837 | 129 | 1 | 0 | -1.432900 | -5.986009 | -1.520208 |
| 61 | 1  | 0 | 0.557474  | 6.715746  | -0.567340 | 130 | 1 | 0 | -1.656471 | -4.526604 | -2.535844 |
| 62 | 1  | 0 | -4.806586 | 1.451619  | 2.390369  | 131 | 1 | 0 | -1.916416 | -4.431495 | -0.769828 |
| 63 | 1  | 0 | -3.655921 | 3.090392  | 3.848892  | 132 | 6 | 0 | 1.003740  | -3.971532 | 2.403684  |
| 64 | 1  | 0 | 2.718643  | 5.434813  | -2.220370 | 133 | 6 | 0 | 1.380841  | -3.502431 | 3.665580  |
| 65 | 1  | 0 | 4.139684  | 3.417474  | -1.991031 | 134 | 6 | 0 | 0.377917  | -5.221476 | 2.299972  |
| 66 | 1  | 0 | 5.612775  | -0.693581 | 1.315209  | 135 | 6 | 0 | 1.148912  | -4.272166 | 4.807868  |
| 67 | 1  | 0 | 5.104667  | -1.085386 | -2.913085 | 136 | 1 | 0 | 1.855065  | -2.527881 | 3.756375  |
| 68 | 1  | 0 | -5.132849 | -2.874997 | 0.417333  | 137 | 6 | 0 | 0.138213  | -5.986502 | 3.439465  |
| 69 | 1  | 0 | -5.428161 | -0.197635 | -2.901124 | 138 | 1 | 0 | 0.073977  | -5.585185 | 1.322357  |
| 70 | 1  | 0 | 2.542561  | 1.570195  | -3.161499 | 139 | 6 | 0 | 0.526238  | -5.515061 | 4.697067  |
| 71 | 1  | 0 | 3.920763  | 1.795935  | -5.205398 | 140 | 1 | 0 | 1.447637  | -3.895398 | 5.782434  |
| 72 | 1  | 0 | 4.862795  | 2.336145  | -3.804436 | 141 | 1 | 0 | -0.352318 | -6.952114 | 3.348262  |
| 73 | 1  | 0 | 5.173497  | 0.750433  | -4.518158 | 142 | 1 | 0 | 0.339530  | -6.113391 | 5.584852  |
| 74 | 1  | 0 | 2.206701  | -0.014811 | -5.003286 | 143 | 1 | 0 | -0.252834 | -1.886095 | 0.497504  |
| 75 | 1  | 0 | 1.848842  | -0.774558 | -3.446736 | 144 | 1 | 0 | 0.022821  | -1.566555 | -1.923652 |
| 76 | 1  | 0 | 3.363392  | -1.151631 | -4.303235 | 145 | 6 | 0 | 7.075324  | -2.564183 | 0.524934  |
| 77 | 1  | 0 | 3.311341  | 2.189573  | 1.617792  | 146 | 6 | 0 | -6.558635 | -2.330963 | -3.526681 |
| 78 | 1  | 0 | 4.059321  | -0.422541 | 3.033624  | 147 | 1 | 0 | -7.102764 | -3.141269 | -4.025566 |
| 79 | 1  | 0 | 3.245680  | 0.967596  | 3.765267  | 148 | 1 | 0 | -5.687177 | -2.087401 | -4.144860 |
| 80 | 1  | 0 | 2.434295  | 0.053394  | 2.482282  | 149 | 1 | 0 | -7.217340 | -1.455443 | -3.505041 |
| 81 | 1  | 0 | 5.744897  | 2.701899  | 1.550535  | 150 | 1 | 0 | 7.550553  | -1.733974 | 1.058947  |
| 82 | 1  | 0 | 6.088442  | 1.248756  | 2.501197  | 151 | 1 | 0 | 7.822328  | -3.359882 | 0.424925  |
| 83 | 1  | 0 | 5.138677  | 2.562057  | 3.212450  | 152 | 1 | 0 | 6.261661  | -2.949978 | 1.150420  |
| 84 | 1  | 0 | -3.106908 | -0.586916 | 2.488184  |     |   |   |           |           |           |
| 85 | 1  | 0 | -4.684827 | -1.633851 | 4.094949  |     |   |   |           |           |           |
| 86 | 1  | 0 | -5.558985 | -0.458815 | 3.095847  |     |   |   |           |           |           |

TS-2nd-(R)-reaction pathway: R-re(S)-Igd (Cy-SPINOL)

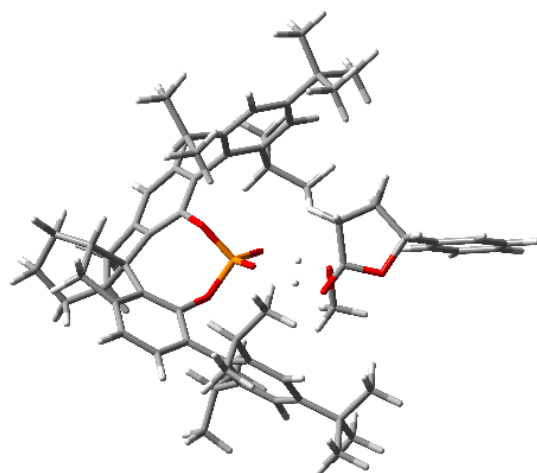

B3LYP/6-31G(d); E(RB3LYP) = -3317.55815858 Hartree  
 Zero-point correction= 1.317542 Hartree  
 Thermal correction to Energy= 1.387774 Hartree  
 Thermal correction to Enthalpy= 1.388718 Hartree  
 Thermal correction to Gibbs Free Energy= 1.211243 Hartree  
 Sum of electronic and zero-point Energies= -3316.240617 Hartree  
 Sum of electronic and thermal Energies= -3316.170384 Hartree  
 Sum of electronic and thermal Enthalpies= -3316.169440 Hartree  
 Sum of electronic and thermal Free Energies= -3316.346916 Hartree  
 The number of Imaginary frequencies = 1

| Center Number | Atomic Number | Atomic Type | Coordinates (Angstroms) |           |           |
|---------------|---------------|-------------|-------------------------|-----------|-----------|
|               |               |             | X                       | Y         | Z         |
| 1             | 6             | 0           | 5.973113                | -0.522181 | 1.304145  |
| 2             | 6             | 0           | 5.360612                | -1.653882 | 0.431130  |
| 3             | 6             | 0           | 4.041992                | 0.346886  | 0.178880  |
| 4             | 6             | 0           | 5.054672                | 0.652106  | 1.097538  |
| 5             | 6             | 0           | 5.106463                | -0.661366 | -1.952962 |
| 6             | 6             | 0           | 4.800487                | -1.881367 | -2.869458 |
| 7             | 6             | 0           | 3.631715                | -2.565984 | -2.210929 |
| 8             | 6             | 0           | 3.254370                | -1.899589 | -1.036983 |
| 9             | 6             | 0           | 4.357422                | -0.942305 | -0.580032 |
| 10            | 6             | 0           | 2.965362                | 1.230313  | 0.060383  |
| 11            | 6             | 0           | 2.971393                | 2.493957  | 0.684253  |
| 12            | 6             | 0           | 4.088541                | 2.816880  | 1.473078  |
| 13            | 6             | 0           | 5.099587                | 1.893158  | 1.725847  |
| 14            | 6             | 0           | 2.928490                | -3.680845 | -2.656832 |
| 15            | 6             | 0           | 1.809105                | -4.104714 | -1.943822 |
| 16            | 6             | 0           | 1.295902                | -3.364973 | -0.865266 |
| 17            | 6             | 0           | 2.025934                | -2.230668 | -0.456878 |
| 18            | 8             | 0           | 1.497650                | -1.405620 | 0.537727  |
| 19            | 8             | 0           | 1.856293                | 0.834886  | -0.687891 |
| 20            | 15            | 0           | 0.698647                | -0.057855 | 0.059981  |
| 21            | 8             | 0           | 0.173165                | 0.587140  | 1.315051  |
| 22            | 8             | 0           | -0.293230               | -0.377101 | -1.055178 |
| 23            | 6             | 0           | 1.838453                | 3.468361  | 0.552697  |
| 24            | 6             | 0           | 0.026879                | -3.802614 | -0.192795 |
| 25            | 6             | 0           | 0.040114                | -4.201359 | 1.169579  |
| 26            | 6             | 0           | -1.141594               | -4.656990 | 1.759043  |
| 27            | 6             | 0           | -2.352581               | -4.752588 | 1.064735  |
| 28            | 6             | 0           | -2.339240               | -4.363628 | -0.275590 |
| 29            | 6             | 0           | -1.186102               | -3.892563 | -0.921157 |
| 30            | 6             | 0           | 1.103001                | 3.873904  | 1.699641  |
| 31            | 6             | 0           | 0.061009                | 4.790957  | 1.543258  |
| 32            | 6             | 0           | -0.308592               | 5.327662  | 0.304955  |
| 33            | 6             | 0           | 0.444938                | 4.931165  | -0.801587 |
| 34            | 6             | 0           | 1.512117                | 4.025900  | -0.705441 |
| 35            | 6             | 0           | -1.305585               | -3.530496 | -2.404802 |

|     |   |   |           |           |           |
|-----|---|---|-----------|-----------|-----------|
| 36  | 6 | 0 | -1.478352 | -4.793958 | -3.274292 |
| 37  | 6 | 0 | -2.452012 | -2.544085 | -2.696380 |
| 38  | 6 | 0 | 1.309196  | -4.217735 | 2.023708  |
| 39  | 6 | 0 | 1.183227  | -3.323629 | 3.271849  |
| 40  | 6 | 0 | 1.700998  | -5.658803 | 2.408827  |
| 41  | 6 | 0 | 1.411310  | 3.382683  | 3.118332  |
| 42  | 6 | 0 | 2.027062  | 4.515514  | 3.966628  |
| 43  | 6 | 0 | 0.187244  | 2.788182  | 3.840628  |
| 44  | 6 | 0 | 2.324652  | 3.744445  | -1.971033 |
| 45  | 6 | 0 | 1.471160  | 3.153308  | -3.108523 |
| 46  | 6 | 0 | 3.067738  | 5.012273  | -2.439788 |
| 47  | 6 | 0 | -1.478298 | 6.325104  | 0.215232  |
| 48  | 6 | 0 | -2.749450 | 5.700755  | 0.839263  |
| 49  | 6 | 0 | -1.109839 | 7.611649  | 0.992454  |
| 50  | 6 | 0 | -3.609723 | -5.289703 | 1.774008  |
| 51  | 6 | 0 | -3.931499 | -4.407528 | 3.003334  |
| 52  | 6 | 0 | -3.351545 | -6.741109 | 2.245054  |
| 53  | 6 | 0 | 6.438763  | -2.496353 | -0.261369 |
| 54  | 6 | 0 | 6.612238  | -0.421900 | -1.789546 |
| 55  | 6 | 0 | 7.345428  | -1.649985 | -1.191524 |
| 56  | 1 | 0 | 6.009950  | -0.813472 | 2.361741  |
| 57  | 1 | 0 | 7.006618  | -0.293335 | 1.017550  |
| 58  | 1 | 0 | 4.757897  | -2.302788 | 1.077434  |
| 59  | 1 | 0 | 4.645392  | 0.230117  | -2.393951 |
| 60  | 1 | 0 | 4.541601  | -1.557117 | -3.885689 |
| 61  | 1 | 0 | 5.665289  | -2.546750 | -2.976057 |
| 62  | 1 | 0 | 4.129581  | 3.798910  | 1.933746  |
| 63  | 1 | 0 | 5.907376  | 2.139307  | 2.410809  |
| 64  | 1 | 0 | 3.246494  | -4.218548 | -3.546805 |
| 65  | 1 | 0 | 1.285191  | -5.003734 | -2.251422 |
| 66  | 1 | 0 | -1.478181 | 0.267033  | -1.054320 |
| 67  | 1 | 0 | -1.104964 | -4.963949 | 2.800600  |
| 68  | 1 | 0 | -3.251211 | -4.431351 | -0.857533 |
| 69  | 1 | 0 | -0.491145 | 5.089086  | 2.429361  |
| 70  | 1 | 0 | 0.218423  | 5.344880  | -1.778202 |
| 71  | 1 | 0 | -0.381576 | -3.033226 | -2.708298 |
| 72  | 1 | 0 | -1.503698 | -4.528330 | -4.338362 |
| 73  | 1 | 0 | -0.665026 | -5.511801 | -3.124838 |
| 74  | 1 | 0 | -2.416723 | -5.309862 | -3.036638 |
| 75  | 1 | 0 | -2.443072 | -2.267511 | -3.758029 |
| 76  | 1 | 0 | -2.343727 | -1.630452 | -2.108898 |
| 77  | 1 | 0 | -3.435944 | -2.980378 | -2.484778 |
| 78  | 1 | 0 | 2.131669  | -3.820155 | 1.425053  |
| 79  | 1 | 0 | 0.408452  | -3.690945 | 3.955978  |
| 80  | 1 | 0 | 2.129859  | -3.311197 | 3.826166  |
| 81  | 1 | 0 | 0.936987  | -2.295245 | 2.993141  |
| 82  | 1 | 0 | 1.833113  | -6.285282 | 1.519442  |
| 83  | 1 | 0 | 0.937773  | -6.131106 | 3.038722  |
| 84  | 1 | 0 | 2.643359  | -5.661942 | 2.970350  |
| 85  | 1 | 0 | 2.148819  | 2.580072  | 3.049002  |
| 86  | 1 | 0 | 2.308084  | 4.143420  | 4.959567  |
| 87  | 1 | 0 | 2.922209  | 4.939272  | 3.497777  |
| 88  | 1 | 0 | 1.313219  | 5.336199  | 4.107829  |
| 89  | 1 | 0 | 0.479842  | 2.446956  | 4.841536  |
| 90  | 1 | 0 | -0.206639 | 1.930456  | 3.292614  |
| 91  | 1 | 0 | -0.616743 | 3.522522  | 3.967979  |
| 92  | 1 | 0 | 3.090234  | 3.003766  | -1.727556 |
| 93  | 1 | 0 | 2.100701  | 2.929702  | -3.978771 |
| 94  | 1 | 0 | 0.989893  | 2.223808  | -2.790807 |
| 95  | 1 | 0 | 0.694390  | 3.853847  | -3.439274 |
| 96  | 1 | 0 | 3.697433  | 4.789017  | -3.309984 |
| 97  | 1 | 0 | 3.711562  | 5.409252  | -1.646972 |
| 98  | 1 | 0 | 2.368402  | 5.805674  | -2.729268 |
| 99  | 1 | 0 | -3.594455 | 6.395192  | 0.750640  |
| 100 | 1 | 0 | -3.019422 | 4.762204  | 0.344125  |
| 101 | 1 | 0 | -2.613934 | 5.478299  | 1.902353  |
| 102 | 1 | 0 | -1.936463 | 8.332522  | 0.956404  |
| 103 | 1 | 0 | -0.222312 | 8.089737  | 0.561840  |
| 104 | 1 | 0 | -0.896338 | 7.399028  | 2.045331  |

|     |   |   |           |           |           |
|-----|---|---|-----------|-----------|-----------|
| 105 | 1 | 0 | -4.818528 | -4.786641 | 3.525975  |
| 106 | 1 | 0 | -3.104552 | -4.388124 | 3.720365  |
| 107 | 1 | 0 | -4.132259 | -3.372783 | 2.700807  |
| 108 | 1 | 0 | -2.506973 | -6.798448 | 2.939410  |
| 109 | 1 | 0 | -4.235070 | -7.140934 | 2.758344  |
| 110 | 1 | 0 | -3.128095 | -7.393905 | 1.393580  |
| 111 | 1 | 0 | 7.050620  | -2.996441 | 0.500303  |
| 112 | 1 | 0 | 5.954032  | -3.299932 | -0.827691 |
| 113 | 1 | 0 | 7.047144  | -0.167013 | -2.764437 |
| 114 | 1 | 0 | 6.764664  | 0.459648  | -1.155962 |
| 115 | 1 | 0 | 7.729190  | -2.290614 | -1.994212 |
| 116 | 1 | 0 | 8.231825  | -1.305308 | -0.646191 |
| 117 | 6 | 0 | -2.904329 | 1.140530  | 0.541719  |
| 118 | 8 | 0 | -4.116435 | 1.722763  | 0.401533  |
| 119 | 8 | 0 | -2.445958 | 0.792824  | -1.076976 |
| 120 | 6 | 0 | -5.196182 | 0.745590  | 0.593357  |
| 121 | 6 | 0 | -4.486320 | -0.623045 | 0.637067  |
| 122 | 6 | 0 | -3.073643 | -0.263975 | 1.106841  |
| 123 | 1 | 0 | -5.624446 | 0.980613  | 1.574529  |
| 124 | 1 | 0 | -4.456104 | -1.072521 | -0.358514 |
| 125 | 1 | 0 | -5.002687 | -1.316444 | 1.306273  |
| 126 | 1 | 0 | -2.298356 | -0.956350 | 0.778755  |
| 127 | 1 | 0 | -3.013329 | -0.174769 | 2.197437  |
| 128 | 8 | 0 | -2.001145 | 1.982947  | 1.003713  |
| 129 | 6 | 0 | -2.296375 | 1.978675  | -1.887581 |
| 130 | 1 | 0 | -3.276502 | 2.448062  | -1.978725 |
| 131 | 1 | 0 | -1.936858 | 1.655375  | -2.866770 |
| 132 | 1 | 0 | -1.584282 | 2.670906  | -1.430854 |
| 133 | 1 | 0 | -1.120515 | 1.498398  | 1.166707  |
| 134 | 6 | 0 | -6.259294 | 0.917628  | -0.463905 |
| 135 | 6 | 0 | -7.563669 | 1.256850  | -0.091463 |
| 136 | 6 | 0 | -5.968096 | 0.728529  | -1.822724 |
| 137 | 6 | 0 | -8.566167 | 1.397401  | -1.053487 |
| 138 | 1 | 0 | -7.797564 | 1.413931  | 0.959137  |
| 139 | 6 | 0 | -6.964866 | 0.877093  | -2.784919 |
| 140 | 1 | 0 | -4.957875 | 0.466295  | -2.123945 |
| 141 | 6 | 0 | -8.267697 | 1.209425  | -2.402574 |
| 142 | 1 | 0 | -9.575563 | 1.658925  | -0.747897 |
| 143 | 1 | 0 | -6.726719 | 0.730627  | -3.835066 |
| 144 | 1 | 0 | -9.044280 | 1.321829  | -3.154282 |
| 145 | 6 | 0 | -1.802941 | 6.719600  | -1.238231 |
| 146 | 6 | 0 | -4.846279 | -5.299235 | 0.855344  |
| 147 | 1 | 0 | -4.701374 | -5.945671 | -0.017510 |
| 148 | 1 | 0 | -5.096233 | -4.294128 | 0.496177  |
| 149 | 1 | 0 | -5.714085 | -5.679303 | 1.406571  |
| 150 | 1 | 0 | -0.959945 | 7.222661  | -1.725417 |
| 151 | 1 | 0 | -2.651560 | 7.413103  | -1.252259 |
| 152 | 1 | 0 | -2.076893 | 5.848281  | -1.844438 |

TS-1st-(S)-reaction pathway: *S-anti*/(S)-1gd (Cy-SPINOL)

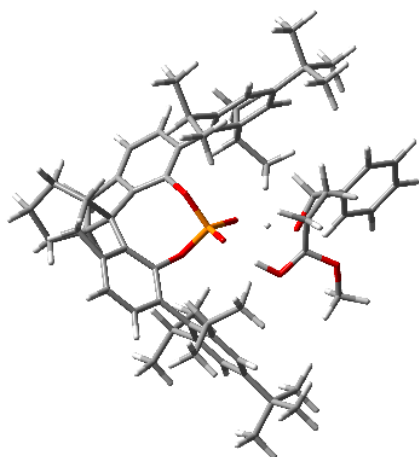

B3LYP/6-31G(d); E(RB3LYP) = -3317.55370348 Hartree  
 Zero-point correction= 1.316926 Hartree  
 Thermal correction to Energy= 1.386999 Hartree  
 Thermal correction to Enthalpy= 1.387943 Hartree  
 Thermal correction to Gibbs Free Energy= 1.212308 Hartree  
 Sum of electronic and zero-point Energies= -3316.236777 Hartree  
 Sum of electronic and thermal Energies= -3316.166705 Hartree  
 Sum of electronic and thermal Enthalpies= -3316.165760 Hartree  
 Sum of electronic and thermal Free Energies= -3316.341395 Hartree  
 The number of Imaginary frequencies = 1

| Center Number | Atomic Number | Atomic Type | Coordinates (Angstroms) |           |           |
|---------------|---------------|-------------|-------------------------|-----------|-----------|
|               |               |             | X                       | Y         | Z         |
| 1             | 6             | 0           | -2.716414               | 5.019744  | 1.565692  |
| 2             | 6             | 0           | -1.414645               | 5.148640  | 0.723221  |
| 3             | 6             | 0           | -2.427212               | 3.002856  | 0.301398  |
| 4             | 6             | 0           | -3.255028               | 3.656095  | 1.223860  |
| 5             | 6             | 0           | -2.122358               | 4.581490  | -1.706805 |
| 6             | 6             | 0           | -0.928546               | 5.014564  | -2.602567 |
| 7             | 6             | 0           | 0.267558                | 4.337882  | -1.990125 |
| 8             | 6             | 0           | -0.091837               | 3.593961  | -0.858098 |
| 9             | 6             | 0           | -1.483580               | 3.996815  | -0.371319 |
| 10            | 6             | 0           | -2.618047               | 1.634714  | 0.085586  |
| 11            | 6             | 0           | -3.759565               | 0.966549  | 0.572839  |
| 12            | 6             | 0           | -4.659555               | 1.718795  | 1.348676  |
| 13            | 6             | 0           | -4.387526               | 3.028902  | 1.732132  |
| 14            | 6             | 0           | 1.583727                | 4.368158  | -2.439025 |
| 15            | 6             | 0           | 2.535569                | 3.599282  | -1.778204 |
| 16            | 6             | 0           | 2.186065                | 2.702204  | -0.752622 |
| 17            | 6             | 0           | 0.842733                | 2.696855  | -0.326960 |
| 18            | 8             | 0           | 0.435867                | 1.794645  | 0.658580  |
| 19            | 8             | 0           | -1.636711               | 0.919525  | -0.612908 |
| 20            | 15            | 0           | -0.341185               | 0.411950  | 0.254834  |
| 21            | 8             | 0           | -0.727820               | -0.248036 | 1.553168  |
| 22            | 8             | 0           | 0.485933                | -0.416209 | -0.734116 |
| 23            | 6             | 0           | -4.066656               | -0.477580 | 0.304118  |
| 24            | 6             | 0           | 3.258653                | 1.818198  | -0.188547 |
| 25            | 6             | 0           | 3.654090                | 1.929631  | 1.169368  |
| 26            | 6             | 0           | 4.744522                | 1.183111  | 1.624511  |
| 27            | 6             | 0           | 5.484761                | 0.330263  | 0.797253  |
| 28            | 6             | 0           | 5.061437                | 0.219439  | -0.529176 |
| 29            | 6             | 0           | 3.974454                | 0.942456  | -1.044460 |
| 30            | 6             | 0           | -4.248337               | -1.386738 | 1.378425  |
| 31            | 6             | 0           | -4.631742               | -2.706318 | 1.098192  |
| 32            | 6             | 0           | -4.858495               | -3.172277 | -0.197413 |
| 33            | 6             | 0           | -4.671230               | -2.255234 | -1.237114 |
| 34            | 6             | 0           | -4.285307               | -0.930089 | -1.023396 |
| 35            | 6             | 0           | 3.651090                | 0.763193  | -2.532701 |
| 36            | 6             | 0           | 4.811459                | 1.252958  | -3.423546 |
| 37            | 6             | 0           | 3.275910                | -0.685894 | -2.890124 |
| 38            | 6             | 0           | 2.991073                | 2.893281  | 2.155226  |
| 39            | 6             | 0           | 2.373395                | 2.156913  | 3.359030  |
| 40            | 6             | 0           | 3.975671                | 3.986699  | 2.617364  |
| 41            | 6             | 0           | -4.102214               | -0.995577 | 2.854632  |
| 42            | 6             | 0           | -5.473081               | -1.007484 | 3.564924  |
| 43            | 6             | 0           | -3.109957               | -1.879968 | 3.633058  |
| 44            | 6             | 0           | -4.189157               | -0.016119 | -2.246574 |
| 45            | 6             | 0           | -3.128950               | -0.503747 | -3.252196 |
| 46            | 6             | 0           | -5.562959               | 0.155618  | -2.926011 |
| 47            | 6             | 0           | -5.348500               | -4.600064 | -0.505017 |
| 48            | 6             | 0           | -6.782333               | -4.523959 | -1.083786 |
| 49            | 6             | 0           | -4.421753               | -5.272254 | -1.544545 |
| 50            | 6             | 0           | 6.737604                | -0.381908 | 1.343221  |
| 51            | 6             | 0           | 7.770085                | 0.685244  | 1.782327  |
| 52            | 6             | 0           | 6.368385                | -1.254681 | 2.564850  |
| 53            | 6             | 0           | -1.249540               | 6.551883  | 0.126962  |
| 54            | 6             | 0           | -3.108427               | 5.730867  | -1.465775 |
| 55            | 6             | 0           | -2.438880               | 6.951558  | -0.783801 |

|     |   |   |           |           |           |     |   |   |           |           |           |
|-----|---|---|-----------|-----------|-----------|-----|---|---|-----------|-----------|-----------|
| 56  | 1 | 0 | -2.501521 | 5.096271  | 2.639408  | 125 | 1 | 0 | 1.047200  | -3.394929 | 3.182765  |
| 57  | 1 | 0 | -3.434497 | 5.817946  | 1.343852  | 126 | 1 | 0 | 1.063660  | -1.781168 | 2.436372  |
| 58  | 1 | 0 | -0.556628 | 4.928850  | 1.369198  | 127 | 8 | 0 | -0.967388 | -2.804010 | 1.110185  |
| 59  | 1 | 0 | -2.647435 | 3.755142  | -2.199990 | 128 | 8 | 0 | 0.307331  | -4.646640 | 1.039342  |
| 60  | 1 | 0 | -1.073364 | 4.689361  | -3.640936 | 129 | 6 | 0 | -0.628838 | -5.232950 | 0.121103  |
| 61  | 1 | 0 | -0.812525 | 6.104158  | -2.640771 | 130 | 1 | 0 | -0.376205 | -6.293365 | 0.091094  |
| 62  | 1 | 0 | -5.566680 | 1.236015  | 1.696304  | 131 | 1 | 0 | -1.652227 | -5.091265 | 0.474374  |
| 63  | 1 | 0 | -5.054057 | 3.550330  | 2.414814  | 132 | 1 | 0 | -0.515748 | -4.790819 | -0.872663 |
| 64  | 1 | 0 | 1.867604  | 4.982757  | -3.289785 | 133 | 1 | 0 | -0.964628 | -1.814112 | 1.330890  |
| 65  | 1 | 0 | 3.574654  | 3.645654  | -2.088328 | 134 | 6 | 0 | 3.216542  | -3.758838 | -0.757704 |
| 66  | 1 | 0 | 5.045130  | 1.303179  | 2.661733  | 135 | 6 | 0 | 2.626147  | -4.196303 | -1.948519 |
| 67  | 1 | 0 | 5.600196  | -0.432346 | -1.207756 | 136 | 6 | 0 | 4.502936  | -4.215775 | -0.437853 |
| 68  | 1 | 0 | -4.766684 | -3.379762 | 1.936790  | 137 | 6 | 0 | 3.302265  | -5.077295 | -2.794856 |
| 69  | 1 | 0 | -4.853238 | -2.572730 | -2.259971 | 138 | 1 | 0 | 1.634201  | -3.844094 | -2.208857 |
| 70  | 1 | 0 | 2.777361  | 1.373110  | -2.768875 | 139 | 6 | 0 | 5.181874  | -5.090792 | -1.286515 |
| 71  | 1 | 0 | 4.531130  | 1.191362  | -4.482045 | 140 | 1 | 0 | 4.981036  | -3.891267 | 0.482884  |
| 72  | 1 | 0 | 5.083921  | 2.291817  | -3.205468 | 141 | 6 | 0 | 4.581796  | -5.527532 | -2.468791 |
| 73  | 1 | 0 | 5.711242  | 0.642020  | -3.283841 | 142 | 1 | 0 | 2.825637  | -5.409634 | -3.713473 |
| 74  | 1 | 0 | 3.069121  | -0.765044 | -3.964622 | 143 | 1 | 0 | 6.177672  | -5.434764 | -1.019452 |
| 75  | 1 | 0 | 2.374145  | -0.990297 | -2.353467 | 144 | 1 | 0 | 5.107361  | -6.212138 | -3.129021 |
| 76  | 1 | 0 | 4.079169  | -1.393716 | -2.657213 | 145 | 6 | 0 | -5.383956 | -5.493417 | 0.749733  |
| 77  | 1 | 0 | 2.176050  | 3.405174  | 1.639414  | 146 | 6 | 0 | 7.407108  | -1.286324 | 0.290850  |
| 78  | 1 | 0 | 3.137219  | 1.633416  | 3.947272  | 147 | 1 | 0 | 7.754557  | -0.713003 | -0.575853 |
| 79  | 1 | 0 | 1.876921  | 2.871355  | 4.027108  | 148 | 1 | 0 | 6.729706  | -2.068500 | -0.069921 |
| 80  | 1 | 0 | 1.627488  | 1.427115  | 3.031266  | 149 | 1 | 0 | 8.281574  | -1.779811 | 0.730571  |
| 81  | 1 | 0 | 4.389337  | 4.534538  | 1.763195  | 150 | 1 | 0 | -4.395647 | -5.580254 | 1.216237  |
| 82  | 1 | 0 | 4.816036  | 3.565361  | 3.181688  | 151 | 1 | 0 | -5.713579 | -6.502583 | 0.476891  |
| 83  | 1 | 0 | 3.466979  | 4.707156  | 3.269529  | 152 | 1 | 0 | -6.082325 | -5.113001 | 1.503354  |
| 84  | 1 | 0 | -3.709713 | 0.022393  | 2.901736  |     |   |   |           |           |           |
| 85  | 1 | 0 | -5.373965 | -0.646838 | 4.596118  |     |   |   |           |           |           |
| 86  | 1 | 0 | -6.208136 | -0.375619 | 3.054560  |     |   |   |           |           |           |
| 87  | 1 | 0 | -5.888547 | -2.021665 | 3.605802  |     |   |   |           |           |           |
| 88  | 1 | 0 | -3.068791 | -1.553949 | 4.679710  |     |   |   |           |           |           |
| 89  | 1 | 0 | -2.104348 | -1.802351 | 3.217966  |     |   |   |           |           |           |
| 90  | 1 | 0 | -3.403316 | -2.936177 | 3.628810  |     |   |   |           |           |           |
| 91  | 1 | 0 | -3.881579 | 0.976825  | -1.911977 |     |   |   |           |           |           |
| 92  | 1 | 0 | -3.045893 | 0.201332  | -4.088660 |     |   |   |           |           |           |
| 93  | 1 | 0 | -2.147595 | -0.585753 | -2.776549 |     |   |   |           |           |           |
| 94  | 1 | 0 | -3.391454 | -1.482359 | -3.672467 |     |   |   |           |           |           |
| 95  | 1 | 0 | -5.490162 | 0.860711  | -3.763298 |     |   |   |           |           |           |
| 96  | 1 | 0 | -6.308525 | 0.540669  | -2.221165 |     |   |   |           |           |           |
| 97  | 1 | 0 | -5.940176 | -0.793773 | -3.324209 |     |   |   |           |           |           |
| 98  | 1 | 0 | -7.157640 | -5.528452 | -1.317178 |     |   |   |           |           |           |
| 99  | 1 | 0 | -7.469274 | -4.061975 | -0.365602 |     |   |   |           |           |           |
| 100 | 1 | 0 | -6.814076 | -3.930871 | -2.003889 |     |   |   |           |           |           |
| 101 | 1 | 0 | -4.775211 | -6.285877 | -1.770780 |     |   |   |           |           |           |
| 102 | 1 | 0 | -3.396096 | -5.347028 | -1.166280 |     |   |   |           |           |           |
| 103 | 1 | 0 | -4.387737 | -4.715737 | -2.486433 |     |   |   |           |           |           |
| 104 | 1 | 0 | 8.677132  | 0.204053  | 2.169113  |     |   |   |           |           |           |
| 105 | 1 | 0 | 7.373493  | 1.334495  | 2.569772  |     |   |   |           |           |           |
| 106 | 1 | 0 | 8.056240  | 1.321961  | 0.937604  |     |   |   |           |           |           |
| 107 | 1 | 0 | 5.669541  | -2.050847 | 2.282425  |     |   |   |           |           |           |
| 108 | 1 | 0 | 7.265400  | -1.728772 | 2.981972  |     |   |   |           |           |           |
| 109 | 1 | 0 | 5.901222  | -0.667914 | 3.362451  |     |   |   |           |           |           |
| 110 | 1 | 0 | -1.142554 | 7.280357  | 0.940807  |     |   |   |           |           |           |
| 111 | 1 | 0 | -0.308445 | 6.592030  | -0.433755 |     |   |   |           |           |           |
| 112 | 1 | 0 | -3.549135 | 6.034882  | -2.423832 |     |   |   |           |           |           |
| 113 | 1 | 0 | -3.943027 | 5.363102  | -0.858021 |     |   |   |           |           |           |
| 114 | 1 | 0 | -2.085776 | 7.662529  | -1.539945 |     |   |   |           |           |           |
| 115 | 1 | 0 | -3.194509 | 7.495112  | -0.204632 |     |   |   |           |           |           |
| 116 | 1 | 0 | 0.775358  | -1.626729 | -0.408222 |     |   |   |           |           |           |
| 117 | 6 | 0 | 0.253751  | -3.308651 | 1.191590  |     |   |   |           |           |           |
| 118 | 8 | 0 | 1.097209  | -2.701318 | -0.144089 |     |   |   |           |           |           |
| 119 | 6 | 0 | 2.516142  | -2.772221 | 0.160914  |     |   |   |           |           |           |
| 120 | 6 | 0 | 2.620203  | -3.121522 | 1.674178  |     |   |   |           |           |           |
| 121 | 6 | 0 | 1.232907  | -2.845795 | 2.255359  |     |   |   |           |           |           |
| 122 | 1 | 0 | 2.911473  | -1.765225 | -0.011699 |     |   |   |           |           |           |
| 123 | 1 | 0 | 2.876114  | -4.176708 | 1.798802  |     |   |   |           |           |           |
| 124 | 1 | 0 | 3.391069  | -2.521316 | 2.163747  |     |   |   |           |           |           |

TS-2nd-(S)-reaction pathway: S-si/(S)-1gd (Cy-SPINOL)

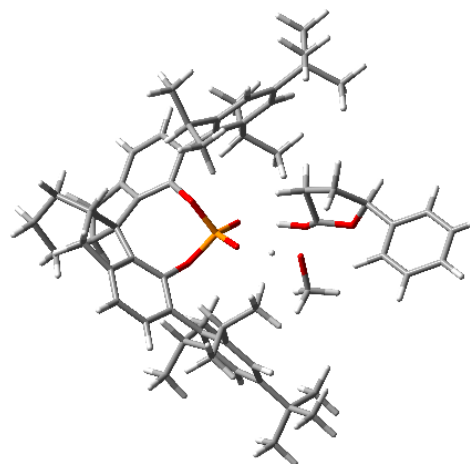

B3LYP/6-31G(d); E(RB3LYP) = -3317.55635221 Hartree

Zero-point correction= 1.317680 Hartree

Thermal correction to Energy= 1.387902 Hartree

Thermal correction to Enthalpy= 1.388847 Hartree

Thermal correction to Gibbs Free Energy= 1.211243 Hartree

Sum of electronic and zero-point Energies= -3316.238672 Hartree

Sum of electronic and thermal Energies= -3316.168450 Hartree

Sum of electronic and thermal Enthalpies= -3316.167506 Hartree

Sum of electronic and thermal Free Energies= -3316.345109 Hartree

The number of Imaginary frequencies = 1

| Center Number | Atomic Number | Atomic Type | Coordinates (Angstroms) |           |           |
|---------------|---------------|-------------|-------------------------|-----------|-----------|
|               |               |             | X                       | Y         | Z         |
| 1             | 6             | 0           | -1.176497               | -5.704341 | 1.554376  |
| 2             | 6             | 0           | -2.265902               | -5.023830 | 0.675795  |
| 3             | 6             | 0           | -0.153498               | -3.920859 | 0.320904  |
| 4             | 6             | 0           | 0.084925                | -4.938787 | 1.253482  |
| 5             | 6             | 0           | -1.279129               | -5.004198 | -1.724305 |

|    |    |   |           |           |           |     |   |   |           |           |           |
|----|----|---|-----------|-----------|-----------|-----|---|---|-----------|-----------|-----------|
| 6  | 6  | 0 | -2.454477 | -4.626178 | -2.668569 | 75  | 1 | 0 | -1.977628 | 2.500593  | -3.913583 |
| 7  | 6  | 0 | -3.012511 | -3.356056 | -2.086084 | 76  | 1 | 0 | -1.421925 | 2.338565  | -2.242548 |
| 8  | 6  | 0 | -2.332369 | -2.990729 | -0.917260 | 77  | 1 | 0 | -2.585917 | 3.611256  | -2.681733 |
| 9  | 6  | 0 | -1.483387 | -4.149655 | -0.396304 | 78  | 1 | 0 | -4.151537 | -1.491590 | 1.484887  |
| 10 | 6  | 0 | 0.828981  | -2.942627 | 0.135963  | 79  | 1 | 0 | -3.963524 | 0.447339  | 3.850594  |
| 11 | 6  | 0 | 2.129255  | -3.100047 | 0.657294  | 80  | 1 | 0 | -3.724224 | -1.303590 | 3.900805  |
| 12 | 6  | 0 | 2.369017  | -4.237744 | 1.447823  | 81  | 1 | 0 | -2.589318 | -0.286511 | 2.995929  |
| 13 | 6  | 0 | 1.349729  | -5.116497 | 1.804581  | 82  | 1 | 0 | -6.593776 | -1.022408 | 1.471079  |
| 14 | 6  | 0 | -4.040805 | -2.566443 | -2.590734 | 83  | 1 | 0 | -6.419671 | -0.016598 | 2.917445  |
| 15 | 6  | 0 | -4.353708 | -1.375330 | -1.943543 | 84  | 1 | 0 | -6.064846 | -1.748459 | 3.001708  |
| 16 | 6  | 0 | -3.590585 | -0.889785 | -0.866511 | 85  | 1 | 0 | 2.535781  | -2.155752 | 2.960348  |
| 17 | 6  | 0 | -2.554404 | -1.715733 | -0.385818 | 86  | 1 | 0 | 4.156459  | -2.665714 | 4.768589  |
| 18 | 8  | 0 | -1.730795 | -1.267755 | 0.646661  | 87  | 1 | 0 | 4.643494  | -3.524575 | 3.297121  |
| 19 | 8  | 0 | 0.498564  | -1.779290 | -0.564216 | 88  | 1 | 0 | 5.494582  | -2.055779 | 3.782338  |
| 20 | 15 | 0 | -0.277267 | -0.600889 | 0.279631  | 89  | 1 | 0 | 2.934176  | -0.462235 | 4.655256  |
| 21 | 8  | 0 | 0.390853  | -0.294788 | 1.592346  | 90  | 1 | 0 | 2.651478  | 0.345058  | 3.107295  |
| 22 | 8  | 0 | -0.439953 | 0.530629  | -0.732967 | 91  | 1 | 0 | 4.293368  | 0.221899  | 3.760705  |
| 23 | 6  | 0 | 3.261620  | -2.148948 | 0.394812  | 92  | 1 | 0 | 2.282881  | -3.235274 | -1.818985 |
| 24 | 6  | 0 | -3.930005 | 0.458205  | -0.300672 | 93  | 1 | 0 | 2.151300  | -2.150476 | -4.027221 |
| 25 | 6  | 0 | -4.382680 | 0.589243  | 1.037883  | 94  | 1 | 0 | 1.853590  | -0.972761 | -2.736585 |
| 26 | 6  | 0 | -4.795870 | 1.842516  | 1.498704  | 95  | 1 | 0 | 3.417723  | -0.999971 | -3.581286 |
| 27 | 6  | 0 | -4.810357 | 2.986096  | 0.692233  | 96  | 1 | 0 | 3.664810  | -4.154003 | -3.625838 |
| 28 | 6  | 0 | -4.360127 | 2.832322  | -0.620728 | 97  | 1 | 0 | 4.483954  | -4.365867 | -2.065802 |
| 29 | 6  | 0 | -3.912109 | 1.605750  | -1.134403 | 98  | 1 | 0 | 5.019140  | -3.103344 | -3.185436 |
| 30 | 6  | 0 | 3.939666  | -1.519737 | 1.475658  | 99  | 1 | 0 | 7.629222  | 2.264797  | 0.183764  |
| 31 | 6  | 0 | 5.072082  | -0.744506 | 1.206577  | 100 | 1 | 0 | 5.897215  | 2.240532  | -0.193146 |
| 32 | 6  | 0 | 5.573585  | -0.542391 | -0.085164 | 101 | 1 | 0 | 6.472894  | 1.656979  | 1.377011  |
| 33 | 6  | 0 | 4.875805  | -1.150233 | -1.129630 | 102 | 1 | 0 | 8.969432  | 0.117478  | 0.272858  |
| 34 | 6  | 0 | 3.745026  | -1.953782 | -0.921696 | 103 | 1 | 0 | 8.182107  | -1.449702 | -0.003376 |
| 35 | 6  | 0 | -3.441544 | 1.584118  | -2.593469 | 104 | 1 | 0 | 7.860829  | -0.547701 | 1.484393  |
| 36 | 6  | 0 | -4.606898 | 1.857480  | -3.566865 | 105 | 1 | 0 | -7.192276 | 5.101507  | 2.092536  |
| 37 | 6  | 0 | -2.289279 | 2.570963  | -2.864202 | 106 | 1 | 0 | -7.431023 | 3.873852  | 0.832550  |
| 38 | 6  | 0 | -4.509152 | -0.595905 | 1.996719  | 107 | 1 | 0 | -6.920952 | 3.389988  | 2.456205  |
| 39 | 6  | 0 | -3.642907 | -0.418369 | 3.258143  | 108 | 1 | 0 | -4.859352 | 5.674086  | 2.909678  |
| 40 | 6  | 0 | -5.983401 | -0.858090 | 2.366291  | 109 | 1 | 0 | -3.433374 | 4.887241  | 2.209489  |
| 41 | 6  | 0 | 3.511081  | -1.663907 | 2.939929  | 110 | 1 | 0 | -4.514145 | 3.976809  | 3.274210  |
| 42 | 6  | 0 | 4.507281  | -2.531787 | 3.738065  | 111 | 1 | 0 | -3.780004 | -6.555909 | 0.845745  |
| 43 | 6  | 0 | 3.338886  | -0.306820 | 3.648053  | 112 | 1 | 0 | -3.980506 | -5.503497 | -0.537032 |
| 44 | 6  | 0 | 3.137115  | -2.639416 | -2.147053 | 113 | 1 | 0 | -1.002133 | -7.026265 | -2.429442 |
| 45 | 6  | 0 | 2.610714  | -1.625593 | -3.180507 | 114 | 1 | 0 | -0.333481 | -6.728029 | -0.841352 |
| 46 | 6  | 0 | 4.136922  | -3.621398 | -2.791145 | 115 | 1 | 0 | -3.180244 | -7.432926 | -1.615630 |
| 47 | 6  | 0 | 6.862150  | 0.275341  | -0.297015 | 116 | 1 | 0 | -2.240226 | -7.970207 | -0.248742 |
| 48 | 6  | 0 | 6.703044  | 1.690052  | 0.307271  | 117 | 6 | 0 | 1.547754  | 2.694949  | 0.911915  |
| 49 | 6  | 0 | 8.036931  | -0.444659 | 0.408562  | 118 | 8 | 0 | 1.915860  | 3.986353  | 1.088507  |
| 50 | 6  | 0 | -5.327267 | 4.323477  | 1.255420  | 119 | 8 | 0 | 0.115829  | 2.803142  | 0.016874  |
| 51 | 6  | 0 | -6.804924 | 4.159102  | 1.685665  | 120 | 1 | 0 | 0.924132  | 1.161266  | 1.909872  |
| 52 | 6  | 0 | -4.483656 | 4.734914  | 2.485100  | 121 | 6 | 0 | 2.895728  | 4.397066  | 0.077389  |
| 53 | 6  | 0 | -3.226734 | -6.041655 | 0.049595  | 122 | 6 | 0 | 2.923910  | 3.236123  | -0.937219 |
| 54 | 6  | 0 | -1.199836 | -6.515755 | -1.478172 | 123 | 6 | 0 | 2.487259  | 2.036932  | -0.091019 |
| 55 | 6  | 0 | -2.493459 | -7.080499 | -0.837130 | 124 | 1 | 0 | 3.853088  | 4.456183  | 0.608135  |
| 56 | 1  | 0 | -1.429176 | -5.636088 | 2.620345  | 125 | 1 | 0 | 2.211223  | 3.418721  | -1.745961 |
| 57 | 1  | 0 | -1.075615 | -6.773947 | 1.335792  | 126 | 1 | 0 | 3.916203  | 3.116587  | -1.380172 |
| 58 | 1  | 0 | -2.836326 | -4.329045 | 1.303168  | 127 | 1 | 0 | 2.016220  | 1.234568  | -0.658482 |
| 59 | 1  | 0 | -0.342251 | -4.666000 | -2.182416 | 128 | 1 | 0 | 3.320112  | 1.608929  | 0.476960  |
| 60 | 1  | 0 | -2.102807 | -4.467390 | -3.696192 | 129 | 8 | 0 | 1.216494  | 2.124179  | 2.060296  |
| 61 | 1  | 0 | -3.209626 | -5.419185 | -2.726883 | 130 | 6 | 0 | -0.966259 | 3.391644  | 0.775215  |
| 62 | 1  | 0 | 3.373211  | -4.401738 | 1.823176  | 131 | 1 | 0 | -1.830572 | 3.448837  | 0.114426  |
| 63 | 1  | 0 | 1.545896  | -5.930938 | 2.497664  | 132 | 1 | 0 | -1.199820 | 2.781591  | 1.650211  |
| 64 | 1  | 0 | -4.594746 | -2.872647 | -3.474800 | 133 | 1 | 0 | -0.644862 | 4.386914  | 1.084479  |
| 65 | 1  | 0 | -5.182444 | -0.772115 | -2.299869 | 134 | 6 | 0 | 2.549094  | 5.758631  | -0.473689 |
| 66 | 1  | 0 | -0.161304 | 1.788426  | -0.306911 | 135 | 6 | 0 | 1.323400  | 5.989420  | -1.114767 |
| 67 | 1  | 0 | -5.146119 | 1.916712  | 2.524418  | 136 | 6 | 0 | 3.466161  | 6.808591  | -0.366230 |
| 68 | 1  | 0 | -4.356122 | 3.689240  | -1.285391 | 137 | 6 | 0 | 1.026796  | 7.246740  | -1.636794 |
| 69 | 1  | 0 | 5.588534  | -0.291885 | 2.048229  | 138 | 1 | 0 | 0.602692  | 5.181118  | -1.200264 |
| 70 | 1  | 0 | 5.227548  | -1.028842 | -2.147969 | 139 | 6 | 0 | 3.174304  | 8.067064  | -0.896725 |
| 71 | 1  | 0 | -3.051358 | 0.587711  | -2.810826 | 140 | 1 | 0 | 4.415619  | 6.641750  | 0.137678  |
| 72 | 1  | 0 | -4.265776 | 1.773152  | -4.605864 | 141 | 6 | 0 | 1.952754  | 8.288687  | -1.531666 |
| 73 | 1  | 0 | -5.433898 | 1.153391  | -3.424871 | 142 | 1 | 0 | 0.072523  | 7.414887  | -2.128905 |
| 74 | 1  | 0 | -5.010958 | 2.868011  | -3.431249 | 143 | 1 | 0 | 3.898225  | 8.872461  | -0.807112 |

|     |   |   |           |           |           |
|-----|---|---|-----------|-----------|-----------|
| 144 | 1 | 0 | 1.720310  | 9.267830  | -1.941670 |
| 145 | 6 | 0 | 7.221308  | 0.432469  | -1.786874 |
| 146 | 6 | 0 | -5.255957 | 5.464600  | 0.222854  |
| 147 | 1 | 0 | -5.868110 | 5.253931  | -0.661318 |
| 148 | 1 | 0 | -4.228433 | 5.651540  | -0.110152 |
| 149 | 1 | 0 | -5.631007 | 6.391973  | 0.670559  |
| 150 | 1 | 0 | 8.132974  | 1.032662  | -1.886747 |
| 151 | 1 | 0 | 6.426820  | 0.939633  | -2.346656 |
| 152 | 1 | 0 | 7.410327  | -0.534718 | -2.265560 |

|    |   |   |           |           |           |
|----|---|---|-----------|-----------|-----------|
| 22 | 8 | 0 | -0.523627 | -0.753641 | 0.778002  |
| 23 | 6 | 0 | 3.676003  | 0.787304  | -0.922441 |
| 24 | 6 | 0 | -3.935960 | 0.312518  | 0.056934  |
| 25 | 6 | 0 | -4.350886 | 0.528347  | -1.284137 |
| 26 | 6 | 0 | -5.083010 | -0.464034 | -1.939495 |
| 27 | 6 | 0 | -5.446855 | -1.670247 | -1.331588 |
| 28 | 6 | 0 | -5.045740 | -1.850831 | -0.008075 |
| 29 | 6 | 0 | -4.299640 | -0.897288 | 0.699443  |
| 30 | 6 | 0 | 3.912656  | -0.014824 | -2.070661 |
| 31 | 6 | 0 | 4.812182  | -1.081402 | -1.974908 |
| 32 | 6 | 0 | 5.496364  | -1.403214 | -0.795879 |
| 33 | 6 | 0 | 5.238908  | -0.603113 | 0.318646  |
| 34 | 6 | 0 | 4.355601  | 0.485757  | 0.280808  |
| 35 | 6 | 0 | -3.931573 | -1.226171 | 2.148988  |
| 36 | 6 | 0 | -5.162448 | -1.140183 | 3.076194  |
| 37 | 6 | 0 | -3.275671 | -2.611867 | 2.299157  |
| 38 | 6 | 0 | -4.092668 | 1.830928  | -2.044544 |
| 39 | 6 | 0 | -3.287377 | 1.602870  | -3.337845 |
| 40 | 6 | 0 | -5.412784 | 2.573599  | -2.335471 |
| 41 | 6 | 0 | 3.266981  | 0.263056  | -3.432026 |
| 42 | 6 | 0 | 4.301258  | 0.824162  | -4.431128 |
| 43 | 6 | 0 | 2.577342  | -0.972023 | -4.041521 |
| 44 | 6 | 0 | 4.248132  | 1.361787  | 1.530595  |
| 45 | 6 | 0 | 3.843719  | 0.569011  | 2.785939  |
| 46 | 6 | 0 | 5.560373  | 2.137568  | 1.766437  |
| 47 | 6 | 0 | 6.512537  | -2.561466 | -0.781916 |
| 48 | 6 | 0 | 5.822388  | -3.878373 | -1.207764 |
| 49 | 6 | 0 | 7.655174  | -2.244560 | -1.776857 |
| 50 | 6 | 0 | -6.253255 | -2.719847 | -2.118170 |
| 51 | 6 | 0 | -7.599650 | -2.106562 | -2.571095 |
| 52 | 6 | 0 | -5.447000 | -3.158277 | -3.363851 |
| 53 | 6 | 0 | -1.398100 | 6.254524  | 0.409002  |
| 54 | 6 | 0 | 0.767619  | 5.969368  | 1.786461  |
| 55 | 6 | 0 | -0.339651 | 6.943265  | 1.307978  |
| 56 | 1 | 0 | -0.014846 | 5.664167  | -2.353099 |
| 57 | 1 | 0 | 0.779147  | 6.476106  | -1.018032 |
| 58 | 1 | 0 | -1.610612 | 4.636142  | -1.000319 |
| 59 | 1 | 0 | 1.084819  | 3.888709  | 2.263768  |
| 60 | 1 | 0 | -0.597172 | 4.015941  | 3.870406  |
| 61 | 1 | 0 | -1.410590 | 5.359183  | 3.094119  |
| 62 | 1 | 0 | 4.216875  | 2.987000  | -2.324321 |
| 63 | 1 | 0 | 2.845972  | 5.026485  | -2.654154 |
| 64 | 1 | 0 | -3.501291 | 3.282631  | 3.636439  |
| 65 | 1 | 0 | -4.736548 | 1.627980  | 2.269641  |
| 66 | 1 | 0 | -0.353275 | -2.029972 | 0.674467  |
| 67 | 1 | 0 | -5.389032 | -0.277079 | -2.965004 |
| 68 | 1 | 0 | -5.312241 | -2.765830 | 0.507738  |
| 69 | 1 | 0 | 4.994453  | -1.674046 | -2.866871 |
| 70 | 1 | 0 | 5.757815  | -0.801819 | 1.249575  |
| 71 | 1 | 0 | -3.197184 | -0.491095 | 2.487934  |
| 72 | 1 | 0 | -4.873872 | -1.335362 | 4.116476  |
| 73 | 1 | 0 | -5.645229 | -0.158044 | 3.038355  |
| 74 | 1 | 0 | -5.916471 | -1.885093 | 2.793759  |
| 75 | 1 | 0 | -2.902193 | -2.740215 | 3.321970  |
| 76 | 1 | 0 | -2.433447 | -2.731150 | 1.615378  |
| 77 | 1 | 0 | -3.988081 | -3.424147 | 2.109059  |
| 78 | 1 | 0 | -3.498691 | 2.490823  | -1.408348 |
| 79 | 1 | 0 | -3.843896 | 0.991278  | -4.058311 |
| 80 | 1 | 0 | -3.068863 | 2.562474  | -3.822902 |
| 81 | 1 | 0 | -2.338303 | 1.103044  | -3.125125 |
| 82 | 1 | 0 | -5.966114 | 2.775621  | -1.411348 |
| 83 | 1 | 0 | -6.067172 | 1.991126  | -2.994742 |
| 84 | 1 | 0 | -5.212365 | 3.532732  | -2.828977 |
| 85 | 1 | 0 | 2.489395  | 1.017178  | -3.288657 |
| 86 | 1 | 0 | 3.817105  | 1.074149  | -5.382999 |
| 87 | 1 | 0 | 4.791210  | 1.728206  | -4.054755 |
| 88 | 1 | 0 | 5.087155  | 0.087978  | -4.640195 |
| 89 | 1 | 0 | 2.103220  | -0.698943 | -4.991994 |
| 90 | 1 | 0 | 1.798427  | -1.352957 | -3.379131 |

TS-1st-(S)-reaction pathway: S-syn/(S)-Igd (Cy-SPINOL)

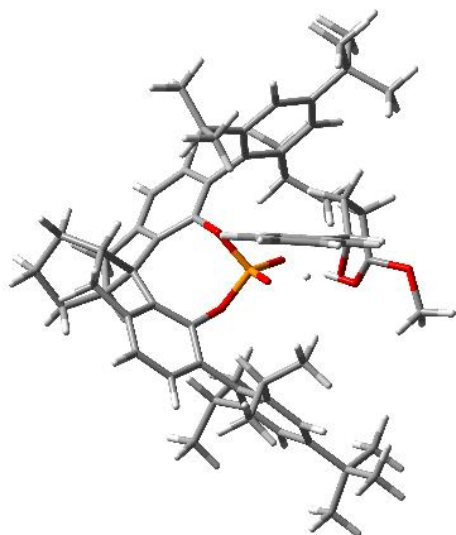

B3LYP/6-31G(d); E(RB3LYP) = -3317.55416038 Hartree

|                                              |                      |
|----------------------------------------------|----------------------|
| Zero-point correction=                       | 1.316388 Hartree     |
| Thermal correction to Energy=                | 1.386826 Hartree     |
| Thermal correction to Enthalpy=              | 1.387770 Hartree     |
| Thermal correction to Gibbs Free Energy=     | 1.208823 Hartree     |
| Sum of electronic and zero-point Energies=   | -3316.237772 Hartree |
| Sum of electronic and thermal Energies=      | -3316.167335 Hartree |
| Sum of electronic and thermal Enthalpies=    | -3316.166391 Hartree |
| Sum of electronic and thermal Free Energies= | -3316.345338 Hartree |

The number of Imaginary frequencies = 1

| Center Number | Atomic Number | Atomic Type | Coordinates (Angstroms) |           |           |
|---------------|---------------|-------------|-------------------------|-----------|-----------|
|               |               |             | X                       | Y         | Z         |
| 1             | 6             | 0           | 0.340110                | 5.518988  | -1.324766 |
| 2             | 6             | 0           | -0.817610               | 5.079411  | -0.386659 |
| 3             | 6             | 0           | 0.922120                | 3.410601  | -0.337522 |
| 4             | 6             | 0           | 1.335655                | 4.393471  | -1.246699 |
| 5             | 6             | 0           | 0.266410                | 4.525059  | 1.906874  |
| 6             | 6             | 0           | -0.930461               | 4.393855  | 2.895098  |
| 7             | 6             | 0           | -1.866018               | 3.417046  | 2.230771  |
| 8             | 6             | 0           | -1.348231               | 2.985183  | 1.003210  |
| 9             | 6             | 0           | -0.232938               | 3.914217  | 0.528179  |
| 10            | 6             | 0           | 1.612213                | 2.194200  | -0.312206 |
| 11            | 6             | 0           | 2.823179                | 2.020550  | -1.011662 |
| 12            | 6             | 0           | 3.270271                | 3.091567  | -1.804034 |
| 13            | 6             | 0           | 2.514417                | 4.248324  | -1.971042 |
| 14            | 6             | 0           | -3.078782               | 2.922627  | 2.701438  |
| 15            | 6             | 0           | -3.758635               | 1.968296  | 1.946775  |
| 16            | 6             | 0           | -3.194149               | 1.387021  | 0.797933  |
| 17            | 6             | 0           | -1.944815               | 1.886802  | 0.379694  |
| 18            | 8             | 0           | -1.272643               | 1.268040  | -0.678038 |
| 19            | 8             | 0           | 1.072322                | 1.132668  | 0.421389  |
| 20            | 15            | 0           | -0.073840               | 0.215097  | -0.317392 |
| 21            | 8             | 0           | 0.410847                | -0.361824 | -1.619413 |

|     |   |   |           |           |           |
|-----|---|---|-----------|-----------|-----------|
| 91  | 1 | 0 | 3.288102  | -1.779862 | -4.254332 |
| 92  | 1 | 0 | 3.467664  | 2.106744  | 1.360409  |
| 93  | 1 | 0 | 3.730372  | 1.246125  | 3.641423  |
| 94  | 1 | 0 | 2.890375  | 0.053361  | 2.635336  |
| 95  | 1 | 0 | 4.595477  | -0.180309 | 3.060634  |
| 96  | 1 | 0 | 5.463104  | 2.805636  | 2.631111  |
| 97  | 1 | 0 | 5.820735  | 2.746801  | 0.893790  |
| 98  | 1 | 0 | 6.398456  | 1.457730  | 1.961152  |
| 99  | 1 | 0 | 6.548054  | -4.700841 | -1.228047 |
| 100 | 1 | 0 | 5.026592  | -4.148874 | -0.503852 |
| 101 | 1 | 0 | 5.376792  | -3.803729 | -2.205013 |
| 102 | 1 | 0 | 8.393186  | -3.056433 | -1.784517 |
| 103 | 1 | 0 | 8.170591  | -1.318643 | -1.497439 |
| 104 | 1 | 0 | 7.281199  | -2.122537 | -2.798716 |
| 105 | 1 | 0 | -8.182616 | -2.840692 | -3.141343 |
| 106 | 1 | 0 | -7.453388 | -1.229050 | -3.209356 |
| 107 | 1 | 0 | -8.197580 | -1.794618 | -1.707048 |
| 108 | 1 | 0 | -4.488041 | -3.601936 | -3.072204 |
| 109 | 1 | 0 | -6.007923 | -3.904419 | -3.940743 |
| 110 | 1 | 0 | -5.232621 | -2.314490 | -4.027646 |
| 111 | 1 | 0 | -1.826775 | 6.985616  | -0.288331 |
| 112 | 1 | 0 | -2.237499 | 5.894097  | 1.014513  |
| 113 | 1 | 0 | 1.161127  | 6.300080  | 2.756125  |
| 114 | 1 | 0 | 1.619115  | 5.991721  | 1.096028  |
| 115 | 1 | 0 | -0.844498 | 7.396162  | 2.169334  |
| 116 | 1 | 0 | 0.127399  | 7.778329  | 0.772772  |
| 117 | 6 | 0 | 0.373135  | -3.575052 | -0.904288 |
| 118 | 8 | 0 | -0.218265 | -3.166660 | 0.610521  |
| 119 | 6 | 0 | 0.816855  | -3.680968 | 1.511806  |
| 120 | 6 | 0 | 1.873698  | -3.337143 | -0.672003 |
| 121 | 1 | 0 | 2.409494  | -4.177651 | -1.119410 |
| 122 | 1 | 0 | 2.175554  | -2.425865 | -1.189544 |
| 123 | 8 | 0 | -0.303208 | -2.849532 | -1.785282 |
| 124 | 8 | 0 | 0.110473  | -4.901764 | -0.994096 |
| 125 | 6 | 0 | -1.246840 | -5.263257 | -1.306972 |
| 126 | 1 | 0 | -1.281770 | -6.349888 | -1.217111 |
| 127 | 1 | 0 | -1.501374 | -4.957921 | -2.324169 |
| 128 | 1 | 0 | -1.938703 | -4.801509 | -0.597117 |
| 129 | 1 | 0 | -0.013319 | -1.877268 | -1.788654 |
| 130 | 6 | 0 | 0.601589  | -3.310506 | 2.960117  |
| 131 | 6 | 0 | 0.622758  | -1.983755 | 3.415516  |
| 132 | 6 | 0 | 0.411633  | -4.340846 | 3.890314  |
| 133 | 6 | 0 | 0.455104  | -1.704032 | 4.771386  |
| 134 | 1 | 0 | 0.732634  | -1.167458 | 2.710195  |
| 135 | 6 | 0 | 0.254046  | -4.061205 | 5.248235  |
| 136 | 1 | 0 | 0.389162  | -5.373041 | 3.547946  |
| 137 | 6 | 0 | 0.275115  | -2.738925 | 5.691925  |
| 138 | 1 | 0 | 0.464823  | -0.671072 | 5.108282  |
| 139 | 1 | 0 | 0.110741  | -4.874442 | 5.954647  |
| 140 | 1 | 0 | 0.149124  | -2.514958 | 6.747918  |
| 141 | 1 | 0 | 0.727480  | -4.766320 | 1.417434  |
| 142 | 6 | 0 | 2.123583  | -3.222911 | 0.849499  |
| 143 | 1 | 0 | 2.967371  | -3.831524 | 1.187524  |
| 144 | 1 | 0 | 2.339973  | -2.185572 | 1.120432  |
| 145 | 6 | 0 | -6.559591 | -3.975795 | -1.280397 |
| 146 | 6 | 0 | 7.136845  | -2.779980 | 0.609463  |
| 147 | 1 | 0 | -7.130709 | -4.691870 | -1.882549 |
| 148 | 1 | 0 | -7.157854 | -3.738761 | -0.393272 |
| 149 | 1 | 0 | -5.643455 | -4.478194 | -0.949328 |
| 150 | 1 | 0 | 7.839872  | -3.619976 | 0.571547  |
| 151 | 1 | 0 | 6.378180  | -3.016424 | 1.364476  |
| 152 | 1 | 0 | 7.693865  | -1.899963 | 0.949947  |

TS-2nd-(S)-reaction pathway: S-re/(S)-Igd (Cy-SPINOL)

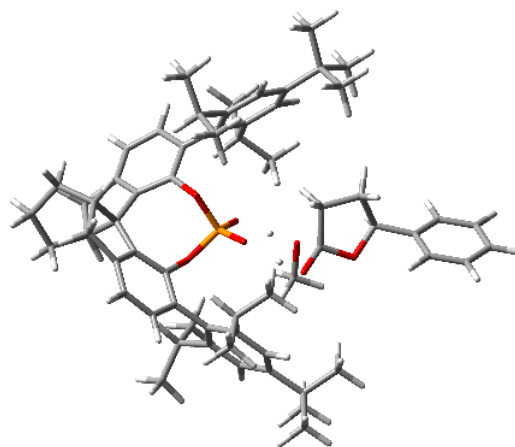

B3LYP/6-31G(d); E(RB3LYP) = -3317.55768978 Hartree  
 Zero-point correction= 1.317656 Hartree  
 Thermal correction to Energy= 1.388103 Hartree  
 Thermal correction to Enthalpy= 1.389047 Hartree  
 Thermal correction to Gibbs Free Energy= 1.210475 Hartree  
 Sum of electronic and zero-point Energies= -3316.240034 Hartree  
 Sum of electronic and thermal Energies= -3316.169587 Hartree  
 Sum of electronic and thermal Enthalpies= -3316.168642 Hartree  
 Sum of electronic and thermal Free Energies= -3316.347215 Hartree  
 The number of Imaginary frequencies = 1

| Center Number | Atomic Number | Atomic Type | Coordinates (Angstroms) |           |           |
|---------------|---------------|-------------|-------------------------|-----------|-----------|
|               |               |             | X                       | Y         | Z         |
| 1             | 6             | 0           | 5.795307                | 0.469183  | 1.940533  |
| 2             | 6             | 0           | 5.510349                | -0.754870 | 1.024632  |
| 3             | 6             | 0           | 3.932107                | 0.995748  | 0.525880  |
| 4             | 6             | 0           | 4.737344                | 1.472891  | 1.568161  |
| 5             | 6             | 0           | 5.447564                | 0.167609  | -1.399923 |
| 6             | 6             | 0           | 5.482899                | -1.090443 | -2.315009 |
| 7             | 6             | 0           | 4.358510                | -1.956627 | -1.811435 |
| 8             | 6             | 0           | 3.710474                | -1.358015 | -0.722294 |
| 9             | 6             | 0           | 4.562379                | -0.227409 | -0.140581 |
| 10            | 6             | 0           | 2.753001                | 1.685126  | 0.229029  |
| 11            | 6             | 0           | 2.461087                | 2.936899  | 0.807054  |
| 12            | 6             | 0           | 3.385336                | 3.449132  | 1.733413  |
| 13            | 6             | 0           | 4.487297                | 2.709619  | 2.155620  |
| 14            | 6             | 0           | 3.919513                | -3.173988 | -2.322747 |
| 15            | 6             | 0           | 2.792841                | -3.775057 | -1.765814 |
| 16            | 6             | 0           | 2.014420                | -3.127517 | -0.791916 |
| 17            | 6             | 0           | 2.482075                | -1.886859 | -0.313709 |
| 18            | 8             | 0           | 1.688181                | -1.157666 | 0.573088  |
| 19            | 8             | 0           | 1.844995                | 1.104653  | -0.655460 |
| 20            | 15            | 0           | 0.754026                | 0.032458  | -0.056815 |
| 21            | 8             | 0           | -0.040126               | 0.589873  | 1.097824  |
| 22            | 8             | 0           | 0.002352                | -0.451829 | -1.289679 |
| 23            | 6             | 0           | 1.212085                | 3.704866  | 0.489969  |
| 24            | 6             | 0           | 0.751773                | -3.770631 | -0.294945 |
| 25            | 6             | 0           | 0.636932                | -4.162748 | 1.064442  |
| 26            | 6             | 0           | -0.521290               | -4.817032 | 1.491181  |
| 27            | 6             | 0           | -1.586116               | -5.118613 | 0.635367  |
| 28            | 6             | 0           | -1.449147               | -4.727240 | -0.697575 |
| 29            | 6             | 0           | -0.312498               | -4.064164 | -1.184813 |
| 30            | 6             | 0           | 0.269686                | 3.996546  | 1.513762  |
| 31            | 6             | 0           | -0.877532               | 4.723769  | 1.187792  |
| 32            | 6             | 0           | -1.157785               | 5.173763  | -0.107142 |
| 33            | 6             | 0           | -0.205993               | 4.893154  | -1.089195 |
| 34            | 6             | 0           | 0.972382                | 4.181507  | -0.819945 |
| 35            | 6             | 0           | -0.276923               | -3.728568 | -2.679278 |

|     |   |   |           |           |           |     |   |   |            |           |           |
|-----|---|---|-----------|-----------|-----------|-----|---|---|------------|-----------|-----------|
| 36  | 6 | 0 | -0.094742 | -5.003086 | -3.531075 | 105 | 1 | 0 | -3.235956  | -7.830942 | 2.060254  |
| 37  | 6 | 0 | -1.525363 | -2.966104 | -3.161305 | 106 | 1 | 0 | -1.932370  | -7.858224 | 0.855078  |
| 38  | 6 | 0 | 1.753044  | -3.959436 | 2.090821  | 107 | 1 | 0 | -1.631814  | -7.201275 | 2.470036  |
| 39  | 6 | 0 | 1.296569  | -3.096918 | 3.282837  | 108 | 1 | 0 | -4.316010  | -5.632622 | 2.741078  |
| 40  | 6 | 0 | 2.323777  | -5.310502 | 2.567582  | 109 | 1 | 0 | -3.781154  | -4.101324 | 2.021810  |
| 41  | 6 | 0 | 0.454501  | 3.579652  | 2.977070  | 110 | 1 | 0 | -2.739018  | -4.952855 | 3.168763  |
| 42  | 6 | 0 | 0.744712  | 4.808694  | 3.864149  | 111 | 1 | 0 | 7.368920   | -1.797498 | 1.374902  |
| 43  | 6 | 0 | -0.741032 | 2.789849  | 3.543122  | 112 | 1 | 0 | 6.542293   | -2.286723 | -0.086459 |
| 44  | 6 | 0 | 1.982431  | 4.020431  | -1.957776 | 113 | 1 | 0 | 7.378500   | 0.973409  | -1.939770 |
| 45  | 6 | 0 | 1.396132  | 3.277297  | -3.172642 | 114 | 1 | 0 | 6.765530   | 1.553233  | -0.407514 |
| 46  | 6 | 0 | 2.564014  | 5.387158  | -2.373841 | 115 | 1 | 0 | 8.279147   | -1.003102 | -1.017192 |
| 47  | 6 | 0 | -2.452882 | 5.957966  | -0.387293 | 116 | 1 | 0 | 8.411790   | 0.059863  | 0.358790  |
| 48  | 6 | 0 | -3.675852 | 5.132820  | 0.080098  | 117 | 6 | 0 | -3.007090  | 0.576704  | -0.050990 |
| 49  | 6 | 0 | -2.415733 | 7.296368  | 0.388797  | 118 | 8 | 0 | -4.280602  | 0.913723  | -0.351606 |
| 50  | 6 | 0 | -2.815860 | -5.876716 | 1.169469  | 119 | 8 | 0 | -2.324946  | 0.283476  | -1.621137 |
| 51  | 6 | 0 | -2.375267 | -7.273685 | 1.669485  | 120 | 6 | 0 | -5.067891  | -0.303377 | -0.505520 |
| 52  | 6 | 0 | -3.446189 | -5.093863 | 2.345209  | 121 | 6 | 0 | -4.437908  | -1.257631 | 0.529792  |
| 53  | 6 | 0 | 6.801132  | -1.410514 | 0.519052  | 122 | 6 | 0 | -2.956807  | -0.833491 | 0.553893  |
| 54  | 6 | 0 | 6.853658  | 0.655123  | -1.029949 | 123 | 1 | 0 | -4.894490  | -0.681624 | -1.520125 |
| 55  | 6 | 0 | 7.682870  | -0.430587 | -0.297006 | 124 | 1 | 0 | -4.908943  | -1.094725 | 1.504227  |
| 56  | 1 | 0 | 5.724006  | 0.195597  | 3.001103  | 125 | 1 | 0 | -4.582353  | -2.305333 | 0.254257  |
| 57  | 1 | 0 | 6.808216  | 0.864464  | 1.797938  | 126 | 1 | 0 | -2.538405  | -0.775705 | 1.560696  |
| 58  | 1 | 0 | 4.934473  | -1.490699 | 1.598195  | 127 | 1 | 0 | -2.318807  | -1.497876 | -0.030170 |
| 59  | 1 | 0 | 4.915994  | 0.967825  | -1.928021 | 128 | 8 | 0 | -2.337064  | 1.586303  | 0.455618  |
| 60  | 1 | 0 | 5.326176  | -0.818669 | -3.366889 | 129 | 6 | 0 | -2.314411  | 1.453478  | -2.464385 |
| 61  | 1 | 0 | 6.451118  | -1.603466 | -2.276846 | 130 | 1 | 0 | -1.785517  | 2.277100  | -1.977167 |
| 62  | 1 | 0 | 3.198092  | 4.428189  | 2.163188  | 131 | 1 | 0 | -1.814003  | 1.178265  | -3.395320 |
| 63  | 1 | 0 | 5.136619  | 3.093359  | 2.938832  | 132 | 1 | 0 | -3.350195  | 1.733622  | -2.660278 |
| 64  | 1 | 0 | 4.447207  | -3.654441 | -3.143118 | 133 | 1 | 0 | -1.411679  | 1.272288  | 0.756926  |
| 65  | 1 | 0 | 2.473717  | -4.749537 | -2.120248 | 134 | 6 | 0 | -6.529586  | 0.007554  | -0.311841 |
| 66  | 1 | 0 | -1.300400 | -0.040192 | -1.469877 | 135 | 6 | 0 | -7.486267  | -0.652841 | -1.089902 |
| 67  | 1 | 0 | -0.581168 | -5.117034 | 2.533650  | 136 | 6 | 0 | -6.953042  | 0.912345  | 0.670197  |
| 68  | 1 | 0 | -2.243405 | -4.949563 | -1.400997 | 137 | 6 | 0 | -8.847923  | -0.425943 | -0.883246 |
| 69  | 1 | 0 | -1.586710 | 4.937417  | 1.981791  | 138 | 1 | 0 | -7.165025  | -1.347609 | -1.863041 |
| 70  | 1 | 0 | -0.362449 | 5.248404  | -2.101880 | 139 | 6 | 0 | -8.312791  | 1.147750  | 0.868747  |
| 71  | 1 | 0 | 0.578690  | -3.073715 | -2.859374 | 140 | 1 | 0 | -6.213574  | 1.443928  | 1.261490  |
| 72  | 1 | 0 | -0.009030 | -4.746210 | -4.594134 | 141 | 6 | 0 | -9.263831  | 0.476200  | 0.096475  |
| 73  | 1 | 0 | 0.800245  | -5.566153 | -3.246817 | 142 | 1 | 0 | -9.580810  | -0.946415 | -1.493762 |
| 74  | 1 | 0 | -0.953227 | -5.676595 | -3.418689 | 143 | 1 | 0 | -8.630714  | 1.858482  | 1.626833  |
| 75  | 1 | 0 | -1.408174 | -2.694132 | -4.217625 | 144 | 1 | 0 | -10.323059 | 0.660474  | 0.254030  |
| 76  | 1 | 0 | -1.674888 | -2.046777 | -2.592217 | 145 | 6 | 0 | -2.634198  | 6.276574  | -1.883618 |
| 77  | 1 | 0 | -2.435569 | -3.573267 | -3.083992 | 146 | 6 | 0 | -3.899259  | -6.075521 | 0.092491  |
| 78  | 1 | 0 | 2.574117  | -3.427682 | 1.605184  | 147 | 1 | 0 | -2.671772  | 5.365210  | -2.491659 |
| 79  | 1 | 0 | 0.502611  | -3.589312 | 3.857692  | 148 | 1 | 0 | -1.827626  | 6.910531  | -2.269030 |
| 80  | 1 | 0 | 2.135741  | -2.921676 | 3.967400  | 149 | 1 | 0 | -3.576426  | 6.815535  | -2.035442 |
| 81  | 1 | 0 | 0.924718  | -2.126252 | 2.943018  | 150 | 1 | 0 | -4.756619  | -6.605616 | 0.522816  |
| 82  | 1 | 0 | 2.687597  | -5.907585 | 1.723752  | 151 | 1 | 0 | -3.532839  | -6.671204 | -0.751037 |
| 83  | 1 | 0 | 1.569070  | -5.905289 | 3.095780  | 152 | 1 | 0 | -4.264573  | -5.119289 | -0.300707 |
| 84  | 1 | 0 | 3.161734  | -5.149800 | 3.257036  |     |   |   |            |           |           |
| 85  | 1 | 0 | 1.318937  | 2.914846  | 3.036213  |     |   |   |            |           |           |
| 86  | 1 | 0 | 0.941590  | 4.499166  | 4.897973  |     |   |   |            |           |           |
| 87  | 1 | 0 | 1.612916  | 5.375043  | 3.508949  |     |   |   |            |           |           |
| 88  | 1 | 0 | -0.109591 | 5.496486  | 3.879027  |     |   |   |            |           |           |
| 89  | 1 | 0 | -0.540033 | 2.512598  | 4.585496  |     |   |   |            |           |           |
| 90  | 1 | 0 | -0.901953 | 1.872361  | 2.974178  |     |   |   |            |           |           |
| 91  | 1 | 0 | -1.667644 | 3.375701  | 3.533517  |     |   |   |            |           |           |
| 92  | 1 | 0 | 2.819183  | 3.421929  | -1.589735 |     |   |   |            |           |           |
| 93  | 1 | 0 | 2.165342  | 3.143577  | -3.943395 |     |   |   |            |           |           |
| 94  | 1 | 0 | 1.030205  | 2.287781  | -2.883794 |     |   |   |            |           |           |
| 95  | 1 | 0 | 0.570121  | 3.836021  | -3.629867 |     |   |   |            |           |           |
| 96  | 1 | 0 | 3.331951  | 5.258722  | -3.146729 |     |   |   |            |           |           |
| 97  | 1 | 0 | 3.022882  | 5.898286  | -1.520090 |     |   |   |            |           |           |
| 98  | 1 | 0 | 1.789296  | 6.048116  | -2.780468 |     |   |   |            |           |           |
| 99  | 1 | 0 | -4.604845 | 5.672172  | -0.143870 |     |   |   |            |           |           |
| 100 | 1 | 0 | -3.713092 | 4.157774  | -0.416939 |     |   |   |            |           |           |
| 101 | 1 | 0 | -3.652554 | 4.946319  | 1.158459  |     |   |   |            |           |           |
| 102 | 1 | 0 | -3.337053 | 7.866900  | 0.215782  |     |   |   |            |           |           |
| 103 | 1 | 0 | -1.568296 | 7.912796  | 0.067093  |     |   |   |            |           |           |
| 104 | 1 | 0 | -2.319571 | 7.134414  | 1.467629  |     |   |   |            |           |           |



Optimized structure of Cy-SPINOL-derived CPA (S)-1gf

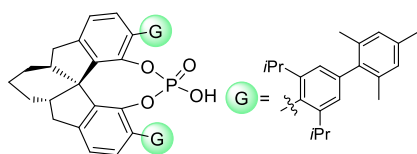

(S)-1gf (Cy-SPINOL)

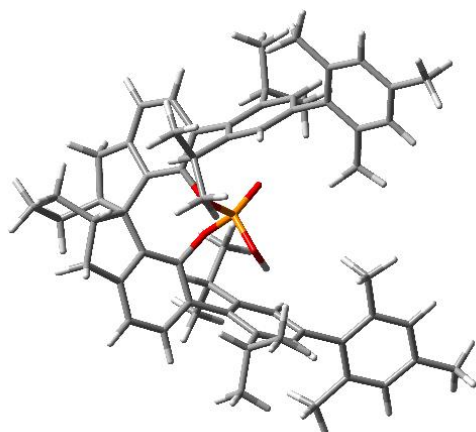

B3LYP/6-31G(d); E(RB3LYP) = -3047.77991365 Hartree

Zero-point correction= 1.184229 Hartree  
 Thermal correction to Energy= 1.250703 Hartree  
 Thermal correction to Enthalpy= 1.251647 Hartree  
 Thermal correction to Gibbs Free Energy= 1.077525 Hartree  
 Sum of electronic and zero-point Energies= -3046.595685 Hartree  
 Sum of electronic and thermal Energies= -3046.529211 Hartree  
 Sum of electronic and thermal Enthalpies= -3046.528266 Hartree  
 Sum of electronic and thermal Free Energies= -3046.702389 Hartree  
 The number of Imaginary frequencies = 0

| Center Number | Atomic Number | Atomic Type | Coordinates (Angstroms) |           |           |
|---------------|---------------|-------------|-------------------------|-----------|-----------|
|               |               |             | X                       | Y         | Z         |
| 1             | 6             | 0           | -0.639957               | 5.191845  | 2.207942  |
| 2             | 6             | 0           | 0.510456                | 5.037312  | 1.173665  |
| 3             | 6             | 0           | -1.204258               | 3.413339  | 0.702978  |
| 4             | 6             | 0           | -1.611026               | 4.097436  | 1.856473  |
| 5             | 6             | 0           | -0.602768               | 5.100756  | -1.172181 |
| 6             | 6             | 0           | 0.577967                | 5.258374  | -2.174543 |
| 7             | 6             | 0           | 1.523945                | 4.138722  | -1.826370 |
| 8             | 6             | 0           | 1.040897                | 3.393142  | -0.742281 |
| 9             | 6             | 0           | -0.073005               | 4.151520  | -0.014544 |
| 10            | 6             | 0           | -1.864000               | 2.227585  | 0.378610  |
| 11            | 6             | 0           | -3.008019               | 1.787916  | 1.073504  |
| 12            | 6             | 0           | -3.463453               | 2.589912  | 2.132069  |
| 13            | 6             | 0           | -2.753324               | 3.712408  | 2.553004  |
| 14            | 6             | 0           | 2.704771                | 3.778966  | -2.469913 |
| 15            | 6             | 0           | 3.392739                | 2.643107  | -2.046556 |
| 16            | 6             | 0           | 2.863324                | 1.780077  | -1.072759 |
| 17            | 6             | 0           | 1.653466                | 2.166958  | -0.468902 |
| 18            | 8             | 0           | 0.999769                | 1.263985  | 0.391970  |
| 19            | 8             | 0           | -1.360691               | 1.436749  | -0.658211 |
| 20            | 15            | 0           | -0.151926               | 0.388018  | -0.345640 |
| 21            | 8             | 0           | -0.606907               | -0.454425 | 0.941911  |
| 22            | 8             | 0           | 0.197319                | -0.339393 | -1.577324 |
| 23            | 6             | 0           | -3.691106               | 0.493818  | 0.730495  |
| 24            | 6             | 0           | 3.589851                | 0.520262  | -0.697703 |
| 25            | 6             | 0           | 4.146922                | 0.391718  | 0.600279  |
| 26            | 6             | 0           | 4.861586                | -0.767232 | 0.922110  |
| 27            | 6             | 0           | 5.053902                | -1.800429 | 0.002763  |

|    |   |   |           |           |           |
|----|---|---|-----------|-----------|-----------|
| 28 | 6 | 0 | 4.507925  | -1.650168 | -1.273532 |
| 29 | 6 | 0 | 3.775590  | -0.517189 | -1.648171 |
| 30 | 6 | 0 | -3.727761 | -0.575341 | 1.673754  |
| 31 | 6 | 0 | -4.337529 | -1.782230 | 1.301568  |
| 32 | 6 | 0 | -4.925323 | -1.969896 | 0.048357  |
| 33 | 6 | 0 | -4.909488 | -0.897856 | -0.846461 |
| 34 | 6 | 0 | -4.309077 | 0.327447  | -0.536447 |
| 35 | 6 | 0 | 3.230624  | -0.457939 | -3.077135 |
| 36 | 6 | 0 | 4.368450  | -0.231594 | -4.094635 |
| 37 | 6 | 0 | 2.422465  | -1.713466 | -3.457704 |
| 38 | 6 | 0 | 4.048178  | 1.484737  | 1.665561  |
| 39 | 6 | 0 | 3.321861  | 0.993397  | 2.932482  |
| 40 | 6 | 0 | 5.437886  | 2.057552  | 2.009443  |
| 41 | 6 | 0 | -3.190696 | -0.460317 | 3.107032  |
| 42 | 6 | 0 | -4.359598 | -0.311096 | 4.104960  |
| 43 | 6 | 0 | -2.296313 | -1.639970 | 3.539145  |
| 44 | 6 | 0 | -4.408155 | 1.453364  | -1.566014 |
| 45 | 6 | 0 | -3.814596 | 1.059534  | -2.931816 |
| 46 | 6 | 0 | -5.868874 | 1.927565  | -1.711926 |
| 47 | 6 | 0 | -5.560876 | -3.276142 | -0.319335 |
| 48 | 6 | 0 | 5.823532  | -3.031673 | 0.373680  |
| 49 | 6 | 0 | 1.063802  | 6.392078  | 0.716322  |
| 50 | 6 | 0 | -1.119357 | 6.451996  | -0.663352 |
| 51 | 6 | 0 | -0.017052 | 7.279050  | 0.046976  |
| 52 | 1 | 0 | -0.269605 | 5.078929  | 3.234677  |
| 53 | 1 | 0 | -1.105942 | 6.183341  | 2.161011  |
| 54 | 1 | 0 | 1.316936  | 4.458176  | 1.638687  |
| 55 | 1 | 0 | -1.418331 | 4.569598  | -1.676822 |
| 56 | 1 | 0 | 0.229904  | 5.167894  | -3.211339 |
| 57 | 1 | 0 | 1.054740  | 6.242722  | -2.100383 |
| 58 | 1 | 0 | -4.365572 | 2.295541  | 2.658471  |
| 59 | 1 | 0 | -3.083010 | 4.270433  | 3.425795  |
| 60 | 1 | 0 | 3.090032  | 4.375071  | -3.293470 |
| 61 | 1 | 0 | 4.338472  | 2.381089  | -2.509905 |
| 62 | 1 | 0 | 5.290668  | -0.869356 | 1.915705  |
| 63 | 1 | 0 | 4.655079  | -2.448417 | -1.995749 |
| 64 | 1 | 0 | -4.366407 | -2.603012 | 2.012603  |
| 65 | 1 | 0 | -5.382147 | -1.026220 | -1.816465 |
| 66 | 1 | 0 | 2.542278  | 0.388147  | -3.143668 |
| 67 | 1 | 0 | 3.962615  | -0.144636 | -5.109946 |
| 68 | 1 | 0 | 4.939593  | 0.678646  | -3.880281 |
| 69 | 1 | 0 | 5.074659  | -1.070867 | -4.088726 |
| 70 | 1 | 0 | 1.996277  | -1.587133 | -4.460544 |
| 71 | 1 | 0 | 1.599682  | -1.868512 | -2.757323 |
| 72 | 1 | 0 | 3.048027  | -2.613866 | -3.481333 |
| 73 | 1 | 0 | 3.461088  | 2.311714  | 1.257804  |
| 74 | 1 | 0 | 3.876746  | 0.188305  | 3.428593  |
| 75 | 1 | 0 | 3.216860  | 1.813529  | 3.653783  |
| 76 | 1 | 0 | 2.322706  | 0.619310  | 2.690251  |
| 77 | 1 | 0 | 5.938818  | 2.445625  | 1.115399  |
| 78 | 1 | 0 | 6.089673  | 1.295928  | 2.453168  |
| 79 | 1 | 0 | 5.346336  | 2.878270  | 2.731580  |
| 80 | 1 | 0 | -2.578214 | 0.442569  | 3.171366  |
| 81 | 1 | 0 | -3.978762 | -0.154812 | 5.121290  |
| 82 | 1 | 0 | -5.010584 | 0.532503  | 3.852875  |
| 83 | 1 | 0 | -4.982032 | -1.213881 | 4.115049  |
| 84 | 1 | 0 | -1.924954 | -1.463605 | 4.555267  |
| 85 | 1 | 0 | -1.424269 | -1.756207 | 2.889398  |
| 86 | 1 | 0 | -2.842198 | -2.589935 | 3.555062  |
| 87 | 1 | 0 | -3.834647 | 2.306986  | -1.197157 |
| 88 | 1 | 0 | -3.843642 | 1.917073  | -3.614852 |
| 89 | 1 | 0 | -2.774229 | 0.737115  | -2.832772 |
| 90 | 1 | 0 | -4.382390 | 0.248506  | -3.402965 |
| 91 | 1 | 0 | -5.928563 | 2.769855  | -2.411644 |
| 92 | 1 | 0 | -6.279359 | 2.254931  | -0.750020 |
| 93 | 1 | 0 | -6.513735 | 1.128553  | -2.096610 |
| 94 | 1 | 0 | 1.493206  | 6.915939  | 1.579711  |
| 95 | 1 | 0 | 1.899025  | 6.220984  | 0.027709  |
| 96 | 1 | 0 | -1.529330 | 7.023567  | -1.505534 |

|     |   |   |           |           |           |     |   |   |           |           |           |
|-----|---|---|-----------|-----------|-----------|-----|---|---|-----------|-----------|-----------|
| 97  | 1 | 0 | -1.962653 | 6.277022  | 0.015341  | 119 | 6 | 0 | -3.313453 | -4.094523 | -1.195429 |
| 98  | 1 | 0 | 0.468940  | 7.954448  | -0.666604 | 120 | 1 | 0 | -4.801147 | -6.282122 | -1.723319 |
| 99  | 1 | 0 | -0.486057 | 7.932455  | 0.791867  | 121 | 1 | 0 | -8.822773 | -2.758479 | 0.676344  |
| 100 | 1 | 0 | -1.490811 | -0.850830 | 0.817084  | 122 | 1 | 0 | -7.805055 | -1.498351 | -0.041018 |
| 101 | 6 | 0 | 7.273077  | -5.353124 | 1.077395  | 123 | 1 | 0 | -7.415574 | -2.131376 | -1.551087 |
| 102 | 6 | 0 | 5.890282  | -5.282906 | 1.265821  | 124 | 1 | 0 | -3.131955 | -3.219740 | -1.830506 |
| 103 | 6 | 0 | 5.153368  | -4.144403 | 0.922989  | 125 | 1 | 0 | -2.889683 | -4.968903 | -1.698457 |
| 104 | 6 | 0 | 7.219286  | -3.080271 | 0.179148  | 126 | 1 | 0 | -2.745319 | -3.934074 | -0.270910 |
| 105 | 6 | 0 | 7.918195  | -4.238423 | 0.535541  | 127 | 1 | 0 | -8.459028 | -6.952848 | -1.589462 |
| 106 | 6 | 0 | 8.043469  | -6.606280 | 1.424692  | 128 | 1 | 0 | -7.304650 | -7.776714 | -0.537652 |
| 107 | 1 | 0 | 5.367801  | -6.137373 | 1.692642  | 129 | 1 | 0 | -6.911038 | -7.521206 | -2.239344 |
| 108 | 6 | 0 | 3.657566  | -4.120485 | 1.148488  | 130 | 1 | 0 | 9.037097  | -2.118116 | -0.483806 |
| 109 | 6 | 0 | 7.967177  | -1.901319 | -0.403978 | 131 | 1 | 0 | 7.848592  | -1.002006 | 0.211890  |
| 110 | 1 | 0 | 8.996145  | -4.268433 | 0.385797  | 132 | 1 | 0 | 7.598050  | -1.643639 | -1.403683 |
| 111 | 6 | 0 | -6.758525 | -5.735905 | -1.020429 | 133 | 1 | 0 | 3.363578  | -3.310778 | 1.826622  |
| 112 | 6 | 0 | -7.506488 | -4.713563 | -0.430747 | 134 | 1 | 0 | 3.12675   | -5.065651 | 1.579591  |
| 113 | 6 | 0 | -6.933229 | -3.488315 | -0.074874 | 135 | 1 | 0 | 3.110398  | -3.954059 | 0.213304  |
| 114 | 6 | 0 | -4.787369 | -4.292845 | -0.917074 | 136 | 1 | 0 | 8.084852  | -7.299174 | 0.573195  |
| 115 | 6 | 0 | -5.401343 | -5.502462 | -1.257802 | 137 | 1 | 0 | 7.578503  | -7.145395 | 2.257346  |
| 116 | 6 | 0 | -7.391976 | -7.063195 | -1.368241 | 138 | 1 | 0 | 9.077302  | -6.377060 | 1.705311  |
| 117 | 1 | 0 | -8.567058 | -4.871142 | -0.242861 |     |   |   |           |           |           |
| 118 | 6 | 0 | -7.790175 | -2.415077 | 0.560322  |     |   |   |           |           |           |

DFT calculation for all conformations of real system using Cy-SPINOL-derived CPA (S)-1gf\*

| TS            | Orientation I | Orientation II | G <sup>‡</sup> (a.u.) | ΔΔG <sup>‡</sup> (kcal/mmol) |
|---------------|---------------|----------------|-----------------------|------------------------------|
| <b>R-anti</b> | --            | --             | -3699.762322          | -2.11                        |
| <b>S-anti</b> | --            | --             | -3699.751096          | 4.93                         |
| <b>S-syn</b>  | --            | --             | -3699.757064          | 1.18                         |
| <b>R-re</b>   | --            | --             | -3699.758952          | 0.00                         |
| <b>S-si</b>   | --            | --             | -3699.755624          | 2.09                         |
| <b>S-re</b>   | --            | --             | -3699.760128          | -0.74                        |

\*In all TSs, conformational isomers by changing the orientation of the mesityl group were calculated, however the conformational isomers generated were converged to the single TS.

DFT calculation of real system using Cy-SPINOL-derived CPA (S)-1gf

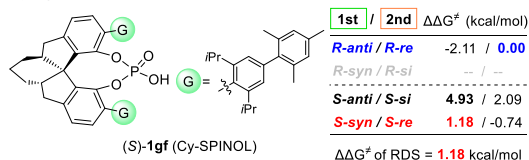

TS-1st-(R)-reaction pathway: R-anti/(S)-1gf (Cy-SPINOL)

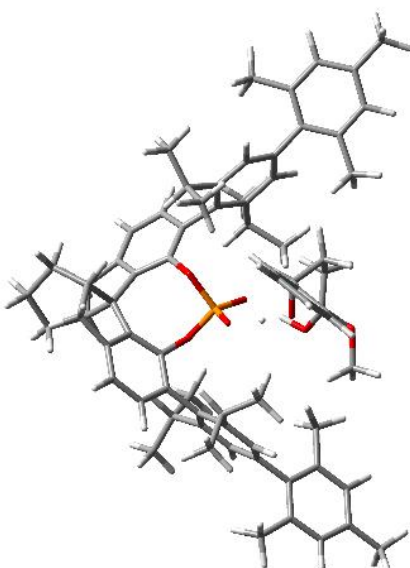

B3LYP/6-31G(d); E(RB3LYP) = -3701.05739287 Hartree

Zero-point correction= 1.418064 Hartree  
 Thermal correction to Energy= 1.497563 Hartree  
 Thermal correction to Enthalpy= 1.498507 Hartree  
 Thermal correction to Gibbs Free Energy= 1.295071 Hartree  
 Sum of electronic and zero-point Energies= -3699.639329 Hartree  
 Sum of electronic and thermal Energies= -3699.559830 Hartree  
 Sum of electronic and thermal Enthalpies= -3699.558886 Hartree  
 Sum of electronic and thermal Free Energies= -3699.762322 Hartree  
 The number of Imaginary frequencies = 1

| Center Number | Atomic Number | Atomic Type | Coordinates (Angstroms) |          |           |
|---------------|---------------|-------------|-------------------------|----------|-----------|
|               |               |             | X                       | Y        | Z         |
| 1             | 6             | 0           | -0.777003               | 5.228488 | 2.671420  |
| 2             | 6             | 0           | 0.381560                | 5.211405 | 1.628983  |
| 3             | 6             | 0           | -1.322638               | 3.654651 | 0.951711  |
| 4             | 6             | 0           | -1.777706               | 4.232133 | 2.143800  |
| 5             | 6             | 0           | -0.793767               | 5.576996 | -0.657631 |
| 6             | 6             | 0           | 0.322979                | 5.872483 | -1.694744 |
| 7             | 6             | 0           | 1.280043                | 4.720938 | -1.554172 |
| 8             | 6             | 0           | 0.892229                | 3.854926 | -0.523583 |
| 9             | 6             | 0           | -0.199112               | 4.487079 | 0.341354  |
| 10            | 6             | 0           | -1.977170               | 2.520211 | 0.469434  |
| 11            | 6             | 0           | -3.227729               | 2.118630 | 0.978734  |
| 12            | 6             | 0           | -3.731582               | 2.839169 | 2.074972  |
| 13            | 6             | 0           | -2.989954               | 3.839119 | 2.702838  |
| 14            | 6             | 0           | 2.407667                | 4.458021 | -2.325034 |
| 15            | 6             | 0           | 3.134750                | 3.299102 | -2.077739 |
| 16            | 6             | 0           | 2.707560                | 2.333555 | -1.147963 |
| 17            | 6             | 0           | 1.548018                | 2.623325 | -0.402065 |
| 18            | 8             | 0           | 1.029812                | 1.675523 | 0.484563  |
| 19            | 8             | 0           | -1.356397               | 1.755296 | -0.524513 |

|    |    |   |           |           |           |     |   |   |           |           |           |
|----|----|---|-----------|-----------|-----------|-----|---|---|-----------|-----------|-----------|
| 20 | 15 | 0 | -0.193914 | 0.710021  | -0.034709 | 89  | 1 | 0 | -5.401613 | 3.957537  | -2.723782 |
| 21 | 8  | 0 | -0.650366 | -0.027365 | 1.223931  | 90  | 1 | 0 | -6.100349 | 3.324347  | -1.220125 |
| 22 | 8  | 0 | 0.209516  | -0.114103 | -1.229209 | 91  | 1 | 0 | -6.255738 | 2.406519  | -2.726028 |
| 23 | 6  | 0 | -4.018478 | 0.994710  | 0.375404  | 92  | 1 | 0 | 1.381130  | 7.024301  | 2.252440  |
| 24 | 6  | 0 | 3.561712  | 1.105041  | -1.001115 | 93  | 1 | 0 | 1.747426  | 6.530848  | 0.614293  |
| 25 | 6  | 0 | 4.328835  | 0.907266  | 0.174457  | 94  | 1 | 0 | -1.725445 | 7.523311  | -0.708192 |
| 26 | 6  | 0 | 5.296395  | -0.105246 | 0.195264  | 95  | 1 | 0 | -2.109375 | 6.587377  | 0.717796  |
| 27 | 6  | 0 | 5.559291  | -0.912284 | -0.916010 | 96  | 1 | 0 | 0.309673  | 8.334863  | 0.171895  |
| 28 | 6  | 0 | 4.755053  | -0.736139 | -2.045900 | 97  | 1 | 0 | -0.605807 | 8.141189  | 1.643491  |
| 29 | 6  | 0 | 3.756086  | 0.242947  | -2.113120 | 98  | 6 | 0 | 6.707684  | -1.876642 | -0.921922 |
| 30 | 6  | 0 | -4.361430 | -0.149424 | 1.144392  | 99  | 6 | 0 | -6.320614 | -2.218090 | -1.403943 |
| 31 | 6  | 0 | -5.109965 | -1.168381 | 0.543601  | 100 | 6 | 0 | 8.906235  | -3.666174 | -0.947977 |
| 32 | 6  | 0 | -5.541629 | -1.100003 | -0.783425 | 101 | 6 | 0 | 9.101215  | -2.282663 | -0.936613 |
| 33 | 6  | 0 | -5.222017 | 0.047326  | -1.511669 | 102 | 6 | 0 | 8.032503  | -1.381152 | -0.921787 |
| 34 | 6  | 0 | -4.475383 | 1.095685  | -0.964528 | 103 | 6 | 0 | 6.493728  | -3.270716 | -0.955261 |
| 35 | 6  | 0 | 2.943762  | 0.348316  | -3.407377 | 104 | 6 | 0 | 7.592386  | -4.137151 | -0.962108 |
| 36 | 6  | 0 | 3.815128  | 0.796661  | -4.598617 | 105 | 6 | 0 | 10.078963 | -4.618772 | -0.925275 |
| 37 | 6  | 0 | 2.226532  | -0.972234 | -3.748485 | 106 | 1 | 0 | 10.116599 | -1.890131 | -0.946322 |
| 38 | 6  | 0 | 4.203935  | 1.804170  | 1.407258  | 107 | 6 | 0 | 8.327526  | 0.103997  | -0.939692 |
| 39 | 6  | 0 | 3.713710  | 1.020667  | 2.639381  | 108 | 6 | 0 | 5.099988  | -3.856316 | -0.985090 |
| 40 | 6  | 0 | 5.521816  | 2.544895  | 1.709363  | 109 | 1 | 0 | 7.412720  | -5.210756 | -0.979484 |
| 41 | 6  | 0 | -3.984167 | -0.314231 | 2.619154  | 110 | 6 | 0 | -7.781756 | -4.345817 | -2.563891 |
| 42 | 6  | 0 | -5.214781 | -0.106570 | 3.528011  | 111 | 6 | 0 | -8.363383 | -3.509225 | -1.607441 |
| 43 | 6  | 0 | -3.339523 | -1.675650 | 2.935759  | 112 | 6 | 0 | -7.659737 | -2.452436 | -1.021504 |
| 44 | 6  | 0 | -4.247698 | 2.330174  | -1.838727 | 113 | 6 | 0 | -5.717620 | -3.046856 | -2.374502 |
| 45 | 6  | 0 | -3.488645 | 1.995078  | -3.136654 | 114 | 6 | 0 | -6.457094 | -4.097602 | -2.929519 |
| 46 | 6  | 0 | -5.580514 | 3.044061  | -2.143265 | 115 | 6 | 0 | -8.571809 | -5.464676 | -3.202851 |
| 47 | 6  | 0 | 0.929656  | 6.614166  | 1.340122  | 116 | 1 | 0 | -9.396351 | -3.680834 | -1.309205 |
| 48 | 6  | 0 | -1.289081 | 6.849239  | 0.040001  | 117 | 6 | 0 | -8.355009 | -1.572874 | -0.004285 |
| 49 | 6  | 0 | -0.161827 | 7.580464  | 0.812593  | 118 | 6 | 0 | -4.290514 | -2.827192 | -2.830127 |
| 50 | 1  | 0 | -0.417327 | 4.930831  | 3.664850  | 119 | 1 | 0 | -5.981330 | -4.739679 | -3.669038 |
| 51 | 1  | 0 | -1.209487 | 6.228361  | 2.794213  | 120 | 1 | 0 | 8.104353  | 0.581838  | 0.021474  |
| 52 | 1  | 0 | 1.190513  | 4.581278  | 2.016875  | 121 | 1 | 0 | 7.728663  | 0.625050  | -1.694363 |
| 53 | 1  | 0 | -1.634440 | 5.105537  | -1.180138 | 122 | 1 | 0 | 9.384916  | 0.282954  | -1.159195 |
| 54 | 1  | 0 | -0.083584 | 5.929806  | -2.712576 | 123 | 1 | 0 | 10.412825 | -4.816879 | 0.102342  |
| 55 | 1  | 0 | 0.813711  | 6.835932  | -1.510122 | 124 | 1 | 0 | 10.937639 | -4.210906 | -1.469980 |
| 56 | 1  | 0 | -4.708138 | 2.572358  | 2.464828  | 125 | 1 | 0 | 9.820869  | -5.583882 | -1.374181 |
| 57 | 1  | 0 | -3.363855 | 4.309563  | 3.608974  | 126 | 1 | 0 | 4.432601  | -3.333442 | -0.294767 |
| 58 | 1  | 0 | 2.721999  | 5.148188  | -3.104600 | 127 | 1 | 0 | 5.116984  | -4.916674 | -0.712774 |
| 59 | 1  | 0 | 4.045260  | 3.105246  | -2.635411 | 128 | 1 | 0 | 4.645618  | -3.779471 | -1.981130 |
| 60 | 1  | 0 | 5.898695  | -0.242181 | 1.089845  | 129 | 1 | 0 | -3.613751 | -2.616855 | -1.995992 |
| 61 | 1  | 0 | 4.938669  | -1.361184 | -2.915804 | 130 | 1 | 0 | -4.210513 | -1.971970 | -3.512858 |
| 62 | 1  | 0 | -5.362683 | -2.051453 | 1.124004  | 131 | 1 | 0 | -3.916444 | -3.705819 | -3.366485 |
| 63 | 1  | 0 | -5.576940 | 0.127851  | -2.535678 | 132 | 1 | 0 | -7.915694 | -6.266089 | -3.559292 |
| 64 | 1  | 0 | 2.164151  | 1.099145  | -3.257576 | 133 | 1 | 0 | -9.145263 | -5.105554 | -4.068268 |
| 65 | 1  | 0 | 3.199684  | 0.907079  | -5.499569 | 134 | 1 | 0 | -9.289515 | -5.902272 | -2.500047 |
| 66 | 1  | 0 | 4.308391  | 1.755866  | -4.409404 | 135 | 1 | 0 | -8.223628 | -0.510021 | -0.235173 |
| 67 | 1  | 0 | 4.597891  | 0.061078  | -4.819916 | 136 | 1 | 0 | -7.961136 | -1.723163 | 1.008039  |
| 68 | 1  | 0 | 1.632328  | -0.849159 | -4.662084 | 137 | 1 | 0 | -9.428284 | -1.786663 | 0.022919  |
| 69 | 1  | 0 | 1.547298  | -1.261111 | -2.944139 | 138 | 6 | 0 | -0.042837 | -3.212732 | -0.128123 |
| 70 | 1  | 0 | 2.936161  | -1.789605 | -3.926241 | 139 | 8 | 0 | -0.211039 | -2.407286 | 1.373735  |
| 71 | 1  | 0 | 3.454727  | 2.570718  | 1.197825  | 140 | 6 | 0 | 1.041449  | -2.508441 | 2.115415  |
| 72 | 1  | 0 | 4.408078  | 0.215251  | 2.908394  | 141 | 6 | 0 | 1.924083  | -3.457469 | 1.278261  |
| 73 | 1  | 0 | 3.625030  | 1.686747  | 3.506430  | 142 | 6 | 0 | 1.475223  | -3.233729 | -0.165237 |
| 74 | 1  | 0 | 2.728195  | 0.583479  | 2.449169  | 143 | 1 | 0 | 1.487093  | -1.507081 | 2.116202  |
| 75 | 1  | 0 | 5.856911  | 3.124375  | 0.841976  | 144 | 1 | 0 | 1.755243  | -4.496467 | 1.576295  |
| 76 | 1  | 0 | 6.326834  | 1.851635  | 1.980313  | 145 | 1 | 0 | 2.982043  | -3.226406 | 1.427908  |
| 77 | 1  | 0 | 5.386288  | 3.237648  | 2.548849  | 146 | 1 | 0 | 1.804859  | -4.024587 | -0.844946 |
| 78 | 1  | 0 | -3.243588 | 0.449719  | 2.867900  | 147 | 1 | 0 | 1.831827  | -2.273753 | -0.548436 |
| 79 | 1  | 0 | -4.926437 | -0.164945 | 4.584783  | 148 | 8 | 0 | -0.745723 | -2.514838 | -1.007363 |
| 80 | 1  | 0 | -5.695340 | 0.863224  | 3.361475  | 149 | 8 | 0 | -0.544109 | -4.441428 | 0.110434  |
| 81 | 1  | 0 | -5.970398 | -0.880503 | 3.344764  | 150 | 6 | 0 | -1.977731 | -4.573591 | 0.068437  |
| 82 | 1  | 0 | -3.010308 | -1.699228 | 3.981384  | 151 | 1 | 0 | -2.178356 | -5.598643 | 0.379480  |
| 83 | 1  | 0 | -2.465573 | -1.858889 | 2.308488  | 152 | 1 | 0 | -2.350639 | -4.402550 | -0.943096 |
| 84 | 1  | 0 | -4.044103 | -2.505542 | 2.800765  | 153 | 1 | 0 | -2.446933 | -3.867406 | 0.759356  |
| 85 | 1  | 0 | -3.633379 | 3.040104  | -1.280107 | 154 | 6 | 0 | 0.793087  | -2.954845 | 3.536948  |
| 86 | 1  | 0 | -3.287783 | 2.911292  | -3.705825 | 155 | 6 | 0 | 1.330304  | -2.228967 | 4.604112  |
| 87 | 1  | 0 | -2.532701 | 1.511569  | -2.916839 | 156 | 6 | 0 | 0.049989  | -4.112472 | 3.805751  |
| 88 | 1  | 0 | -4.070493 | 1.328689  | -3.784798 | 157 | 6 | 0 | 1.139957  | -2.654988 | 5.920536  |

|     |   |   |           |           |           |
|-----|---|---|-----------|-----------|-----------|
| 158 | 1 | 0 | 1.896707  | -1.321860 | 4.404702  |
| 159 | 6 | 0 | -0.148173 | -4.534433 | 5.118792  |
| 160 | 1 | 0 | -0.377852 | -4.673667 | 2.979416  |
| 161 | 6 | 0 | 0.399770  | -3.808196 | 6.179644  |
| 162 | 1 | 0 | 1.562852  | -2.080593 | 6.739851  |
| 163 | 1 | 0 | -0.730630 | -5.431113 | 5.316072  |
| 164 | 1 | 0 | 0.244841  | -4.138262 | 7.203985  |
| 165 | 1 | 0 | -0.468179 | -1.302995 | 1.261021  |
| 166 | 1 | 0 | -0.350120 | -1.593432 | -1.175201 |

|    |   |   |           |           |           |
|----|---|---|-----------|-----------|-----------|
| 22 | 8 | 0 | -0.403703 | -0.236836 | -1.282687 |
| 23 | 6 | 0 | 3.780717  | -1.328060 | 0.736504  |
| 24 | 6 | 0 | -3.764042 | -1.370622 | -0.498553 |
| 25 | 6 | 0 | -4.256679 | -1.500628 | 0.825897  |
| 26 | 6 | 0 | -5.088624 | -0.502891 | 1.345674  |
| 27 | 6 | 0 | -5.458564 | 0.622454  | 0.606093  |
| 28 | 6 | 0 | -4.960587 | 0.735841  | -0.695042 |
| 29 | 6 | 0 | -4.128017 | -0.233436 | -1.268422 |
| 30 | 6 | 0 | 3.954340  | -0.475603 | 1.860448  |
| 31 | 6 | 0 | 4.778975  | 0.648435  | 1.735040  |
| 32 | 6 | 0 | 5.437746  | 0.967621  | 0.545144  |
| 33 | 6 | 0 | 5.231675  | 0.133483  | -0.556333 |
| 34 | 6 | 0 | 4.426569  | -1.011312 | -0.485401 |
| 35 | 6 | 0 | -3.689381 | -0.029576 | -2.721670 |
| 36 | 6 | 0 | -4.876960 | -0.210722 | -3.690657 |
| 37 | 6 | 0 | -3.028087 | 1.338953  | -2.966585 |
| 38 | 6 | 0 | -3.976375 | -2.716993 | 1.709669  |
| 39 | 6 | 0 | -3.244441 | -2.329296 | 3.008693  |
| 40 | 6 | 0 | -5.270813 | -3.498904 | 2.011367  |
| 41 | 6 | 0 | 3.324169  | -0.744861 | 3.231345  |
| 42 | 6 | 0 | 4.398528  | -1.136582 | 4.268318  |
| 43 | 6 | 0 | 2.500702  | 0.444392  | 3.761820  |
| 44 | 6 | 0 | 4.354900  | -1.911820 | -1.720019 |
| 45 | 6 | 0 | 3.733052  | -1.191844 | -2.931050 |
| 46 | 6 | 0 | 5.740299  | -2.491244 | -2.070923 |
| 47 | 6 | 0 | -0.924967 | -7.200514 | -0.208955 |
| 48 | 6 | 0 | 1.250541  | -6.928081 | -1.573090 |
| 49 | 6 | 0 | 0.186033  | -7.911702 | -1.023008 |
| 50 | 1 | 0 | 0.373479  | -6.283245 | 2.505471  |
| 51 | 1 | 0 | 1.232277  | -7.173440 | 1.263968  |
| 52 | 1 | 0 | -1.248872 | -5.472877 | 1.040837  |
| 53 | 1 | 0 | 1.468028  | -4.886642 | -2.238523 |
| 54 | 1 | 0 | -0.171195 | -5.255379 | -3.851931 |
| 55 | 1 | 0 | -0.931997 | -6.559307 | -2.962778 |
| 56 | 1 | 0 | 4.444792  | -3.380754 | 2.296235  |
| 57 | 1 | 0 | 3.198979  | -5.467022 | 2.778122  |
| 58 | 1 | 0 | -3.099595 | -4.653097 | -3.746625 |
| 59 | 1 | 0 | -4.443556 | -2.927442 | -2.580566 |
| 60 | 1 | 0 | -5.482831 | -0.614925 | 2.352279  |
| 61 | 1 | 0 | -5.241698 | 1.606251  | -1.282079 |
| 62 | 1 | 0 | 4.929686  | 1.293336  | 2.596668  |
| 63 | 1 | 0 | 5.747472  | 0.363008  | -1.485670 |
| 64 | 1 | 0 | -2.938481 | -0.786566 | -2.959131 |
| 65 | 1 | 0 | -4.539955 | -0.127336 | -4.731181 |
| 66 | 1 | 0 | -5.362362 | -1.184859 | -3.570296 |
| 67 | 1 | 0 | -5.641346 | 0.558493  | -3.525366 |
| 68 | 1 | 0 | -2.699551 | 1.411817  | -4.010745 |
| 69 | 1 | 0 | -2.151011 | 1.470054  | -2.330092 |
| 70 | 1 | 0 | -3.720240 | 2.170258  | -2.785612 |
| 71 | 1 | 0 | -3.320734 | -3.397178 | 1.161613  |
| 72 | 1 | 0 | -3.861138 | -1.678421 | 3.640514  |
| 73 | 1 | 0 | -3.008853 | -3.226745 | 3.593949  |
| 74 | 1 | 0 | -2.307671 | -1.809205 | 2.789084  |
| 75 | 1 | 0 | -5.770337 | -3.810899 | 1.087190  |
| 76 | 1 | 0 | -5.982642 | -2.897698 | 2.589125  |
| 77 | 1 | 0 | -5.045214 | -4.398921 | 2.596362  |
| 78 | 1 | 0 | 2.632595  | -1.584427 | 3.129837  |
| 79 | 1 | 0 | 3.930016  | -1.391595 | 5.226728  |
| 80 | 1 | 0 | 4.991788  | -1.998057 | 3.943289  |
| 81 | 1 | 0 | 5.094492  | -0.308283 | 4.448615  |
| 82 | 1 | 0 | 2.075111  | 0.190541  | 4.740610  |
| 83 | 1 | 0 | 1.675752  | 0.680073  | 3.088211  |
| 84 | 1 | 0 | 3.112847  | 1.344148  | 3.893516  |
| 85 | 1 | 0 | 3.709449  | -2.761771 | -1.487125 |
| 86 | 1 | 0 | 3.675260  | -1.871341 | -3.790382 |
| 87 | 1 | 0 | 2.718879  | -0.851951 | -2.700825 |
| 88 | 1 | 0 | 4.331354  | -0.324686 | -3.236667 |
| 89 | 1 | 0 | 5.661351  | -3.186976 | -2.915352 |
| 90 | 1 | 0 | 6.167685  | -3.035631 | -1.221384 |

TS-2nd-(R)-reaction pathway: R-re/(S)-Igf (Cy-SPINOL)

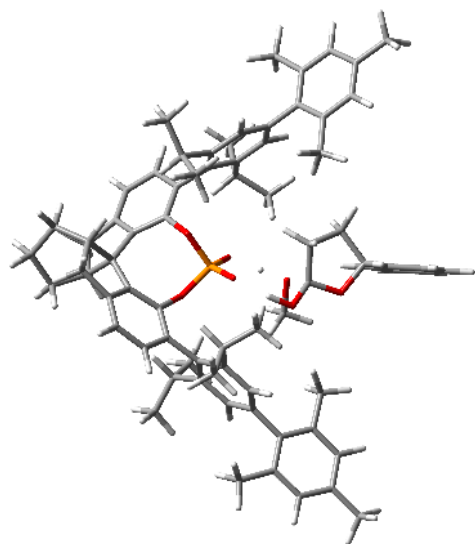

B3LYP/6-31G(d); E(RB3LYP) = -3701.05658257 Hartree

Zero-point correction= 1.419138 Hartree  
 Thermal correction to Energy= 1.498576 Hartree  
 Thermal correction to Enthalpy= 1.499521 Hartree  
 Thermal correction to Gibbs Free Energy= 1.297630 Hartree  
 Sum of electronic and zero-point Energies= -3699.637445 Hartree  
 Sum of electronic and thermal Energies= -3699.558006 Hartree  
 Sum of electronic and thermal Enthalpies= -3699.557062 Hartree  
 Sum of electronic and thermal Free Energies= -3699.758952 Hartree

The number of Imaginary frequencies = 1

| Center Number | Atomic Number | Atomic Type | Coordinates (Angstroms) |           |           |
|---------------|---------------|-------------|-------------------------|-----------|-----------|
|               |               |             | X                       | Y         | Z         |
| 1             | 6             | 0           | 0.739705                | -6.216055 | 1.472991  |
| 2             | 6             | 0           | -0.422324               | -5.927362 | 0.481896  |
| 3             | 6             | 0           | 1.229082                | -4.180606 | 0.301816  |
| 4             | 6             | 0           | 1.676803                | -5.051105 | 1.303189  |
| 5             | 6             | 0           | 0.677171                | -5.530415 | -1.836219 |
| 6             | 6             | 0           | -0.503906               | -5.556292 | -2.850125 |
| 7             | 6             | 0           | -1.499782               | -4.570018 | -2.297560 |
| 8             | 6             | 0           | -1.031984               | -3.998387 | -1.106632 |
| 9             | 6             | 0           | 0.118958                | -4.821845 | -0.529034 |
| 10            | 6             | 0           | 1.849140                | -2.933849 | 0.171840  |
| 11            | 6             | 0           | 3.025045                | -2.618422 | 0.880938  |
| 12            | 6             | 0           | 3.519896                | -3.590113 | 1.768781  |
| 13            | 6             | 0           | 2.833649                | -4.773425 | 2.024717  |
| 14            | 6             | 0           | -2.720590               | -4.183709 | -2.842071 |
| 15            | 6             | 0           | -3.461481               | -3.192169 | -2.202525 |
| 16            | 6             | 0           | -2.950661               | -2.477150 | -1.105963 |
| 17            | 6             | 0           | -1.693518               | -2.872405 | -0.607676 |
| 18            | 8             | 0           | -1.083042               | -2.110863 | 0.393534  |
| 19            | 8             | 0           | 1.270118                | -1.992571 | -0.680814 |
| 20            | 15            | 0           | 0.069717                | -1.044779 | -0.077461 |
| 21            | 8             | 0           | 0.504887                | -0.294289 | 1.154098  |

|     |   |   |            |           |           |
|-----|---|---|------------|-----------|-----------|
| 91  | 1 | 0 | 6.449318   | -1.704512 | -2.354284 |
| 92  | 1 | 0 | -1.329225  | -7.885804 | 0.547040  |
| 93  | 1 | 0 | -1.769444  | -6.943228 | -0.858518 |
| 94  | 1 | 0 | 1.680713   | -7.325454 | -2.501238 |
| 95  | 1 | 0 | 2.087600   | -6.840206 | -0.870474 |
| 96  | 1 | 0 | -0.276800  | -8.469128 | -1.845842 |
| 97  | 1 | 0 | 0.684782   | -8.667144 | -0.404580 |
| 98  | 6 | 0 | -6.380870  | 1.655366  | 1.178239  |
| 99  | 6 | 0 | 6.388395   | 2.126656  | 0.483006  |
| 100 | 6 | 0 | -8.133844  | 3.600975  | 2.254764  |
| 101 | 6 | 0 | -6.818425  | 3.485849  | 2.708974  |
| 102 | 6 | 0 | -5.937215  | 2.528879  | 2.193689  |
| 103 | 6 | 0 | -7.711314  | 1.750076  | 0.712775  |
| 104 | 6 | 0 | -8.560452  | 2.716860  | 1.260297  |
| 105 | 6 | 0 | -9.060516  | 4.660658  | 2.804418  |
| 106 | 1 | 0 | -6.464983  | 4.158377  | 3.488813  |
| 107 | 6 | 0 | -4.528278  | 2.452829  | 2.740958  |
| 108 | 6 | 0 | -8.246642  | 0.810011  | -0.346188 |
| 109 | 1 | 0 | -9.586934  | 2.775847  | 0.902406  |
| 110 | 6 | 0 | 8.209994   | 4.289442  | 0.403560  |
| 111 | 6 | 0 | 6.869632   | 4.462288  | 0.053227  |
| 112 | 6 | 0 | 5.951567   | 3.405911  | 0.084459  |
| 113 | 6 | 0 | 7.741398   | 1.929986  | 0.837356  |
| 114 | 6 | 0 | 8.625825   | 3.011666  | 0.788283  |
| 115 | 6 | 0 | 9.176269   | 5.451606  | 0.393768  |
| 116 | 1 | 0 | 6.523528   | 5.447453  | -0.254987 |
| 117 | 6 | 0 | 4.519849   | 3.652463  | -0.332835 |
| 118 | 6 | 0 | 8.248671   | 0.570130  | 1.265578  |
| 119 | 1 | 0 | 9.667813   | 2.850625  | 1.059803  |
| 120 | 1 | 0 | 4.317851   | 3.212862  | -1.318507 |
| 121 | 1 | 0 | 4.311957   | 4.724937  | -0.404010 |
| 122 | 1 | 0 | 3.798714   | 3.210544  | 0.360810  |
| 123 | 1 | 0 | 8.859389   | 6.230745  | -0.307848 |
| 124 | 1 | 0 | 10.185699  | 5.132281  | 0.111349  |
| 125 | 1 | 0 | 9.251012   | 5.918100  | 1.385552  |
| 126 | 1 | 0 | 9.321590   | 0.604223  | 1.479584  |
| 127 | 1 | 0 | 8.080598   | -0.186994 | 0.490823  |
| 128 | 1 | 0 | 7.735141   | 0.211933  | 2.165567  |
| 129 | 1 | 0 | -4.292030  | 3.344842  | 3.330605  |
| 130 | 1 | 0 | -3.788434  | 2.360260  | 1.939326  |
| 131 | 1 | 0 | -4.388561  | 1.581509  | 3.392449  |
| 132 | 1 | 0 | -8.780510  | 4.949432  | 3.823168  |
| 133 | 1 | 0 | -10.099485 | 4.313579  | 2.824702  |
| 134 | 1 | 0 | -9.036119  | 5.570994  | 2.190005  |
| 135 | 1 | 0 | -7.807131  | 1.006642  | -1.331323 |
| 136 | 1 | 0 | -9.332231  | 0.913086  | -0.441378 |
| 137 | 1 | 0 | -8.021868  | -0.235278 | -0.107337 |
| 138 | 1 | 0 | -0.038777  | 1.061374  | -1.355142 |
| 139 | 6 | 0 | 0.354632   | 2.763771  | 0.154824  |
| 140 | 8 | 0 | 0.636626   | 4.069885  | -0.056716 |
| 141 | 8 | 0 | 0.249750   | 2.121581  | -1.432389 |
| 142 | 6 | 0 | -0.581955  | 4.886849  | -0.004990 |
| 143 | 6 | 0 | -1.739051  | 3.868531  | 0.018414  |
| 144 | 6 | 0 | -1.087495  | 2.621934  | 0.625024  |
| 145 | 1 | 0 | -0.529749  | 5.420970  | 0.951807  |
| 146 | 1 | 0 | -2.089770  | 3.661323  | -0.995582 |
| 147 | 1 | 0 | -2.585825  | 4.241561  | 0.600087  |
| 148 | 1 | 0 | -1.547775  | 1.680252  | 0.325962  |
| 149 | 1 | 0 | -1.068301  | 2.660427  | 1.720180  |
| 150 | 8 | 0 | 1.352873   | 2.131037  | 0.740083  |
| 151 | 6 | 0 | 1.495411   | 2.202967  | -2.159859 |
| 152 | 1 | 0 | 1.736708   | 3.258368  | -2.290923 |
| 153 | 1 | 0 | 1.332087   | 1.726357  | -3.129743 |
| 154 | 1 | 0 | 2.295335   | 1.694851  | -1.616581 |
| 155 | 1 | 0 | 1.084178   | 1.172162  | 0.948691  |
| 156 | 6 | 0 | -0.594423  | 5.891144  | -1.130843 |
| 157 | 6 | 0 | -0.629945  | 7.259215  | -0.843640 |
| 158 | 6 | 0 | -0.588644  | 5.477784  | -2.471462 |
| 159 | 6 | 0 | -0.666661  | 8.202641  | -1.872706 |

|     |   |   |           |          |           |
|-----|---|---|-----------|----------|-----------|
| 160 | 1 | 0 | -0.625096 | 7.590176 | 0.191795  |
| 161 | 6 | 0 | -0.616861 | 6.418564 | -3.499648 |
| 162 | 1 | 0 | -0.560620 | 4.417590 | -2.706253 |
| 163 | 6 | 0 | -0.658791 | 7.784388 | -3.202757 |
| 164 | 1 | 0 | -0.697059 | 9.262856 | -1.633082 |
| 165 | 1 | 0 | -0.608444 | 6.086751 | -4.533939 |
| 166 | 1 | 0 | -0.683699 | 8.515690 | -4.005911 |

TS-1st-(S)-reaction pathway: S-anti/(S)-1gf (Cy-SPINOL)

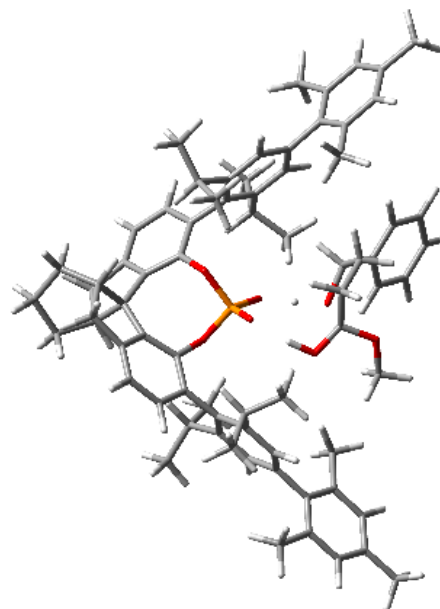

B3LYP/6-31G(d); E(RB3LYP) = -3701.04937008 Hartree  
 Zero-point correction= 1.418887 Hartree  
 Thermal correction to Energy= 1.497867 Hartree  
 Thermal correction to Enthalpy= 1.498811 Hartree  
 Thermal correction to Gibbs Free Energy= 1.298274 Hartree  
 Sum of electronic and zero-point Energies= -3699.630483 Hartree  
 Sum of electronic and thermal Energies= -3699.551503 Hartree  
 Sum of electronic and thermal Enthalpies= -3699.550559 Hartree  
 Sum of electronic and thermal Free Energies= -3699.751096 Hartree  
 The number of Imaginary frequencies = 1

| Center Number | Atomic Number | Atomic Type | Coordinates (Angstroms) |          |           |
|---------------|---------------|-------------|-------------------------|----------|-----------|
|               |               |             | X                       | Y        | Z         |
| 1             | 6             | 0           | -1.363644               | 5.867951 | 1.712923  |
| 2             | 6             | 0           | -0.168317               | 5.704791 | 0.729695  |
| 3             | 6             | 0           | -1.684878               | 3.854033 | 0.453113  |
| 4             | 6             | 0           | -2.238026               | 4.670897 | 1.447672  |
| 5             | 6             | 0           | -1.257688               | 5.338778 | -1.597657 |
| 6             | 6             | 0           | -0.110089               | 5.485807 | -2.634514 |
| 7             | 6             | 0           | 0.960124                | 4.546525 | -2.148628 |
| 8             | 6             | 0           | 0.575949                | 3.904762 | -0.963544 |
| 9             | 6             | 0           | -0.620484               | 4.612013 | -0.332415 |
| 10            | 6             | 0           | -2.210192               | 2.572367 | 0.267445  |
| 11            | 6             | 0           | -3.435377               | 2.195008 | 0.854531  |
| 12            | 6             | 0           | -4.046562               | 3.123855 | 1.715314  |
| 13            | 6             | 0           | -3.430040               | 4.320098 | 2.071661  |
| 14            | 6             | 0           | 2.186950                | 4.275716 | -2.744963 |
| 15            | 6             | 0           | 3.018212                | 3.325198 | -2.162711 |
| 16            | 6             | 0           | 2.604223                | 2.544674 | -1.068578 |
| 17            | 6             | 0           | 1.342451                | 2.825474 | -0.507848 |
| 18            | 8             | 0           | 0.855142                | 2.037192 | 0.539404  |
| 19            | 8             | 0           | -1.486264               | 1.653955 | -0.506393 |
| 20            | 15            | 0           | -0.260444               | 0.869037 | 0.255671  |

|    |   |   |           |           |           |     |   |   |           |           |           |
|----|---|---|-----------|-----------|-----------|-----|---|---|-----------|-----------|-----------|
| 21 | 8 | 0 | -0.675540 | 0.329176  | 1.599592  | 90  | 1 | 0 | -6.265080 | 2.609190  | -1.658444 |
| 22 | 8 | 0 | 0.263378  | -0.138990 | -0.773973 | 91  | 1 | 0 | -6.355097 | 1.294217  | -2.840139 |
| 23 | 6 | 0 | -4.132128 | 0.894675  | 0.578297  | 92  | 1 | 0 | 0.611550  | 7.714127  | 0.879452  |
| 24 | 6 | 0 | 3.544352  | 1.493936  | -0.556679 | 93  | 1 | 0 | 1.104680  | 6.862661  | -0.566732 |
| 25 | 6 | 0 | 4.149218  | 1.639983  | 0.716886  | 94  | 1 | 0 | -2.378979 | 7.091039  | -2.175662 |
| 26 | 6 | 0 | 5.133190  | 0.727422  | 1.112331  | 95  | 1 | 0 | -2.738659 | 6.514670  | -0.564360 |
| 27 | 6 | 0 | 5.530100  | -0.345990 | 0.308574  | 96  | 1 | 0 | -0.487343 | 8.325288  | -1.488705 |
| 28 | 6 | 0 | 4.897904  | -0.487158 | -0.933462 | 97  | 1 | 0 | -1.449228 | 8.409098  | -0.036766 |
| 29 | 6 | 0 | 3.937952  | 0.420441  | -1.399145 | 98  | 6 | 0 | 6.618631  | -1.281718 | 0.736057  |
| 30 | 6 | 0 | -4.445608 | -0.000391 | 1.638339  | 99  | 6 | 0 | -6.431713 | -2.698006 | -0.208409 |
| 31 | 6 | 0 | -5.169460 | -1.162819 | 1.348842  | 100 | 6 | 0 | 8.684437  | -3.076943 | 1.504884  |
| 32 | 6 | 0 | -5.626666 | -1.465377 | 0.062716  | 101 | 6 | 0 | 7.553891  | -2.893618 | 2.299417  |
| 33 | 6 | 0 | -5.322734 | -0.562710 | -0.958933 | 102 | 6 | 0 | 6.529335  | -2.005656 | 1.947729  |
| 34 | 6 | 0 | -4.584901 | 0.603539  | -0.734857 | 103 | 6 | 0 | 7.775478  | -1.438350 | -0.069891 |
| 35 | 6 | 0 | 3.416310  | 0.246956  | -2.830599 | 104 | 6 | 0 | 8.778154  | -2.325078 | 0.330626  |
| 36 | 6 | 0 | 4.548128  | 0.470336  | -3.855833 | 105 | 6 | 0 | 9.766278  | -4.058457 | 1.890541  |
| 37 | 6 | 0 | 2.737729  | -1.110008 | -3.079447 | 106 | 1 | 0 | 7.462299  | -3.452966 | 3.229126  |
| 38 | 6 | 0 | 3.827736  | 2.796671  | 1.664154  | 107 | 6 | 0 | 5.373137  | -1.854471 | 2.914392  |
| 39 | 6 | 0 | 3.235812  | 2.297925  | 2.996230  | 108 | 6 | 0 | 7.995932  | -0.642254 | -1.340539 |
| 40 | 6 | 0 | 5.060048  | 3.692228  | 1.902043  | 109 | 1 | 0 | 9.665791  | -2.424198 | -0.291998 |
| 41 | 6 | 0 | -4.093239 | 0.272896  | 3.106092  | 110 | 6 | 0 | -7.956835 | -5.036594 | -0.707355 |
| 42 | 6 | 0 | -5.361268 | 0.634490  | 3.910899  | 111 | 6 | 0 | -8.433776 | -4.028954 | 0.135365  |
| 43 | 6 | 0 | -3.370228 | -0.892315 | 3.806780  | 112 | 6 | 0 | -7.698768 | -2.869490 | 0.398418  |
| 44 | 6 | 0 | -4.371207 | 1.539793  | -1.925695 | 113 | 6 | 0 | -5.946830 | -3.694425 | -1.084494 |
| 45 | 6 | 0 | -3.567970 | 0.864262  | -3.053434 | 114 | 6 | 0 | -6.713113 | -4.844147 | -1.309656 |
| 46 | 6 | 0 | -5.711979 | 2.092036  | -2.450635 | 115 | 6 | 0 | -8.755150 | -6.297830 | -0.942612 |
| 47 | 6 | 0 | 0.248606  | 7.037304  | 0.095512  | 116 | 1 | 0 | -9.412504 | -4.144082 | 0.598263  |
| 48 | 6 | 0 | -1.915537 | 6.684089  | -1.267857 | 117 | 6 | 0 | -8.304732 | -1.814885 | 1.301228  |
| 49 | 6 | 0 | -0.909363 | 7.709643  | -0.685727 | 118 | 6 | 0 | -4.620810 | -3.558836 | -1.803437 |
| 50 | 1 | 0 | -1.019513 | 5.876619  | 2.755205  | 119 | 1 | 0 | -6.323564 | -5.609458 | -1.979164 |
| 51 | 1 | 0 | -1.897780 | 6.813594  | 1.563211  | 120 | 1 | 0 | -8.150133 | -0.805682 | 0.906641  |
| 52 | 1 | 0 | 0.682443  | 5.286546  | 1.280262  | 121 | 1 | 0 | -7.868182 | -1.830151 | 2.307351  |
| 53 | 1 | 0 | -2.014773 | 4.661053  | -2.009210 | 122 | 1 | 0 | -9.381626 | -1.978876 | 1.411372  |
| 54 | 1 | 0 | -0.447384 | 5.210646  | -3.642170 | 123 | 1 | 0 | -8.582884 | -7.034626 | -0.146227 |
| 55 | 1 | 0 | 0.251753  | 6.518293  | -2.708200 | 124 | 1 | 0 | -8.482813 | -6.774180 | -1.890455 |
| 56 | 1 | 0 | -5.010266 | 2.871242  | 2.143387  | 125 | 1 | 0 | -9.831463 | -6.093273 | -0.963853 |
| 57 | 1 | 0 | -3.883463 | 4.970831  | 2.815335  | 126 | 1 | 0 | -4.215070 | -4.546088 | -2.051468 |
| 58 | 1 | 0 | 2.498534  | 4.803367  | -3.643010 | 127 | 1 | 0 | -3.882999 | -3.015094 | -1.208583 |
| 59 | 1 | 0 | 4.002022  | 3.140745  | -2.582392 | 128 | 1 | 0 | -4.728351 | -3.011309 | -2.748978 |
| 60 | 1 | 0 | 5.628454  | 0.872350  | 2.068164  | 129 | 1 | 0 | 7.627849  | 0.383715  | -1.249358 |
| 61 | 1 | 0 | 5.182885  | -1.319872 | -1.570051 | 130 | 1 | 0 | 7.486409  | -1.087146 | -2.204115 |
| 62 | 1 | 0 | -5.394267 | -1.856024 | 2.154251  | 131 | 1 | 0 | 9.063281  | -0.603244 | -1.581676 |
| 63 | 1 | 0 | -5.693167 | -0.767152 | -1.959602 | 132 | 1 | 0 | 5.606603  | -1.129173 | 3.705480  |
| 64 | 1 | 0 | 2.655774  | 1.009648  | -3.008823 | 133 | 1 | 0 | 5.157320  | -2.806756 | 3.411708  |
| 65 | 1 | 0 | 4.149307  | 0.437167  | -4.876894 | 134 | 1 | 0 | 4.463902  | -1.500671 | 2.425065  |
| 66 | 1 | 0 | 5.043316  | 1.437917  | -3.717000 | 135 | 1 | 0 | 9.648798  | -5.012117 | 1.358301  |
| 67 | 1 | 0 | 5.317967  | -0.306608 | -3.775457 | 136 | 1 | 0 | 9.744165  | -4.278962 | 2.962913  |
| 68 | 1 | 0 | 2.419150  | -1.179731 | -4.126769 | 137 | 1 | 0 | 10.762652 | -3.674221 | 1.644509  |
| 69 | 1 | 0 | 1.848178  | -1.215450 | -2.455102 | 138 | 1 | 0 | 0.299951  | -1.372785 | -0.439320 |
| 70 | 1 | 0 | 3.407049  | -1.954736 | -2.884134 | 139 | 6 | 0 | -0.434211 | -2.885499 | 1.251215  |
| 71 | 1 | 0 | 3.070002  | 3.425647  | 1.191403  | 140 | 8 | 0 | 0.409578  | -2.492133 | -0.162234 |
| 72 | 1 | 0 | 3.950518  | 1.672999  | 3.545794  | 141 | 6 | 0 | 1.804574  | -2.837826 | 0.037397  |
| 73 | 1 | 0 | 2.978325  | 3.147812  | 3.640190  | 142 | 6 | 0 | 1.946597  | -3.226725 | 1.537471  |
| 74 | 1 | 0 | 2.326195  | 1.714500  | 2.825585  | 143 | 6 | 0 | 0.707805  | -2.652230 | 2.224121  |
| 75 | 1 | 0 | 5.458863  | 4.077245  | 0.956790  | 144 | 1 | 0 | 2.375048  | -1.923510 | -0.159694 |
| 76 | 1 | 0 | 5.866883  | 3.149354  | 2.408197  | 145 | 1 | 0 | 1.968789  | -4.314365 | 1.642802  |
| 77 | 1 | 0 | 4.791932  | 4.549070  | 2.532017  | 146 | 1 | 0 | 2.870487  | -2.822345 | 1.959502  |
| 78 | 1 | 0 | -3.414000 | 1.127941  | 3.139851  | 147 | 1 | 0 | 0.481374  | -3.146878 | 3.173565  |
| 79 | 1 | 0 | -5.096757 | 0.915698  | 4.937611  | 148 | 1 | 0 | 0.794816  | -1.576676 | 2.398901  |
| 80 | 1 | 0 | -5.916262 | 1.466255  | 3.464752  | 149 | 8 | 0 | -1.512134 | -2.115752 | 1.257048  |
| 81 | 1 | 0 | -6.046082 | -0.220645 | 3.965793  | 150 | 8 | 0 | -0.702060 | -4.200720 | 1.127571  |
| 82 | 1 | 0 | -3.140642 | -0.611124 | 4.841785  | 151 | 6 | 0 | -1.838052 | -4.556873 | 0.324401  |
| 83 | 1 | 0 | -2.433176 | -1.141886 | 3.308866  | 152 | 1 | 0 | -1.827475 | -5.647204 | 0.279170  |
| 84 | 1 | 0 | -3.985978 | -1.798633 | 3.843731  | 153 | 1 | 0 | -2.762233 | -4.200984 | 0.784784  |
| 85 | 1 | 0 | -3.790323 | 2.400866  | -1.588536 | 154 | 1 | 0 | -1.742502 | -4.137818 | -0.680764 |
| 86 | 1 | 0 | -3.385333 | 1.575408  | -3.868635 | 155 | 1 | 0 | -1.268223 | -1.150596 | 1.447799  |
| 87 | 1 | 0 | -2.600496 | 0.510411  | -2.686022 | 156 | 6 | 0 | 2.248206  | -3.929166 | -0.920093 |
| 88 | 1 | 0 | -4.109247 | 0.010003  | -3.478080 | 157 | 6 | 0 | 1.430505  | -4.385778 | -1.958448 |
| 89 | 1 | 0 | -5.538117 | 2.805574  | -3.265493 | 158 | 6 | 0 | 3.529019  | -4.483166 | -0.777138 |

|     |   |   |          |           |           |
|-----|---|---|----------|-----------|-----------|
| 159 | 6 | 0 | 1.880350 | -5.380738 | -2.829578 |
| 160 | 1 | 0 | 0.444300 | -3.955977 | -2.085182 |
| 161 | 6 | 0 | 3.979616 | -5.473103 | -1.649366 |
| 162 | 1 | 0 | 4.181053 | -4.137988 | 0.023103  |
| 163 | 6 | 0 | 3.154770 | -5.927760 | -2.680031 |
| 164 | 1 | 0 | 1.230793 | -5.724766 | -3.631060 |
| 165 | 1 | 0 | 4.975985 | -5.890669 | -1.521628 |
| 166 | 1 | 0 | 3.503054 | -6.700866 | -3.359886 |

|    |    |   |           |           |           |
|----|----|---|-----------|-----------|-----------|
| 20 | 15 | 0 | -0.050629 | -0.932978 | 0.245345  |
| 21 | 8  | 0 | 0.377050  | -0.375888 | 1.576271  |
| 22 | 8  | 0 | -0.541460 | 0.040133  | -0.823758 |
| 23 | 6  | 0 | 3.874023  | -1.237933 | 0.612492  |
| 24 | 6  | 0 | -3.852738 | -1.268560 | -0.581391 |
| 25 | 6  | 0 | -4.459089 | -1.362300 | 0.698006  |
| 26 | 6  | 0 | -5.419145 | -0.412989 | 1.069816  |
| 27 | 6  | 0 | -5.815420 | 0.624210  | 0.221886  |
| 28 | 6  | 0 | -5.179490 | 0.723106  | -1.019636 |
| 29 | 6  | 0 | -4.209677 | -0.195503 | -1.443699 |
| 30 | 6  | 0 | 4.266186  | -0.379501 | 1.675345  |
| 31 | 6  | 0 | 5.230798  | 0.607163  | 1.431602  |
| 32 | 6  | 0 | 5.821387  | 0.782906  | 0.177550  |
| 33 | 6  | 0 | 5.378280  | -0.030210 | -0.868262 |
| 34 | 6  | 0 | 4.425027  | -1.039104 | -0.680389 |
| 35 | 6  | 0 | -3.618325 | -0.009221 | -2.846381 |
| 36 | 6  | 0 | -4.687356 | -0.214382 | -3.940318 |
| 37 | 6  | 0 | -2.940413 | 1.361240  | -3.035889 |
| 38 | 6  | 0 | -4.175353 | -2.500708 | 1.679045  |
| 39 | 6  | 0 | -3.566832 | -1.982225 | 2.995999  |
| 40 | 6  | 0 | -5.437714 | -3.346260 | 1.942848  |
| 41 | 6  | 0 | 3.708751  | -0.494078 | 3.097771  |
| 42 | 6  | 0 | 4.778276  | -0.987004 | 4.095213  |
| 43 | 6  | 0 | 3.116792  | 0.835292  | 3.602523  |
| 44 | 6  | 0 | 4.085279  | -1.921096 | -1.882938 |
| 45 | 6  | 0 | 3.401990  | -1.115649 | -3.004497 |
| 46 | 6  | 0 | 5.327071  | -2.667856 | -2.409984 |
| 47 | 6  | 0 | -0.948817 | -7.043574 | 0.080178  |
| 48 | 6  | 0 | 1.247007  | -6.827757 | -1.260538 |
| 49 | 6  | 0 | 0.170780  | -7.787367 | -0.691793 |
| 50 | 1  | 0 | 0.355083  | -5.976061 | 2.761000  |
| 51 | 1  | 0 | 1.192472  | -6.959060 | 1.576541  |
| 52 | 1  | 0 | -1.282879 | -5.271474 | 1.264500  |
| 53 | 1  | 0 | 1.486502  | -4.813150 | -1.991738 |
| 54 | 1  | 0 | -0.092564 | -5.256295 | -3.646546 |
| 55 | 1  | 0 | -0.893913 | -6.510945 | -2.722032 |
| 56 | 1  | 0 | 4.539820  | -3.229785 | 2.216125  |
| 57 | 1  | 0 | 3.257649  | -5.242365 | 2.880420  |
| 58 | 1  | 0 | -2.996749 | -4.609188 | -3.690934 |
| 59 | 1  | 0 | -4.382355 | -2.848970 | -2.636214 |
| 60 | 1  | 0 | -5.909253 | -0.507958 | 2.035363  |
| 61 | 1  | 0 | -5.472449 | 1.529130  | -1.688177 |
| 62 | 1  | 0 | 5.556680  | 1.242198  | 2.251465  |
| 63 | 1  | 0 | 5.824753  | 0.099921  | -1.850926 |
| 64 | 1  | 0 | -2.841056 | -0.762755 | -2.990319 |
| 65 | 1  | 0 | -4.231415 | -0.154177 | -4.935950 |
| 66 | 1  | 0 | -5.183002 | -1.187151 | -3.854931 |
| 67 | 1  | 0 | -5.465704 | 0.556401  | -3.885414 |
| 68 | 1  | 0 | -2.543422 | 1.441679  | -4.055168 |
| 69 | 1  | 0 | -2.104216 | 1.486020  | -2.344914 |
| 70 | 1  | 0 | -3.643300 | 2.191227  | -2.892833 |
| 71 | 1  | 0 | -3.440538 | -3.169566 | 1.227065  |
| 72 | 1  | 0 | -4.258840 | -1.315454 | 3.524906  |
| 73 | 1  | 0 | -3.341090 | -2.820938 | 3.665859  |
| 74 | 1  | 0 | -2.635903 | -1.438643 | 2.810358  |
| 75 | 1  | 0 | -5.851723 | -3.742966 | 1.008903  |
| 76 | 1  | 0 | -6.224036 | -2.762939 | 2.435961  |
| 77 | 1  | 0 | -5.197076 | -4.194572 | 2.595054  |
| 78 | 1  | 0 | 2.891774  | -1.219722 | 3.084185  |
| 79 | 1  | 0 | 4.341259  | -1.103625 | 5.094292  |
| 80 | 1  | 0 | 5.208386  | -1.950265 | 3.802898  |
| 81 | 1  | 0 | 5.603397  | -0.268830 | 4.175971  |
| 82 | 1  | 0 | 2.665506  | 0.691302  | 4.591394  |
| 83 | 1  | 0 | 2.338188  | 1.208074  | 2.934975  |
| 84 | 1  | 0 | 3.883926  | 1.612582  | 3.704099  |
| 85 | 1  | 0 | 3.375897  | -2.685615 | -1.560032 |
| 86 | 1  | 0 | 3.142123  | -1.774051 | -3.842528 |
| 87 | 1  | 0 | 2.480541  | -0.649074 | -2.643440 |
| 88 | 1  | 0 | 4.059896  | -0.329046 | -3.393856 |

TS-2nd-(S)-reaction pathway: S-si(S)-Igf (Cy-SPINOL)

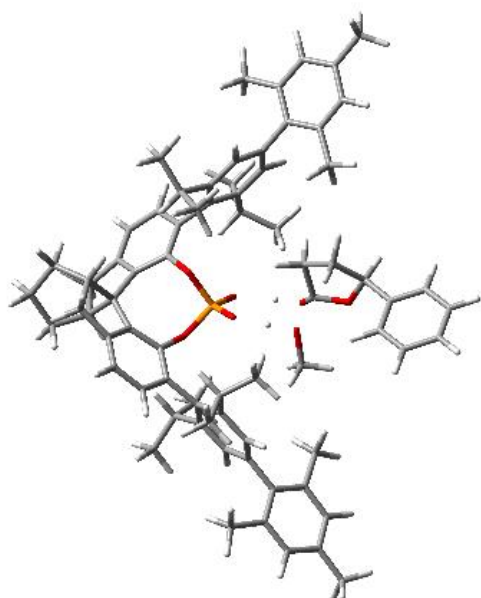

B3LYP/6-31G(d); E(RB3LYP) = -3701.05231407 Hartree  
 Zero-point correction= 1.419222 Hartree  
 Thermal correction to Energy= 1.498718 Hartree  
 Thermal correction to Enthalpy= 1.499663 Hartree  
 Thermal correction to Gibbs Free Energy= 1.296690 Hartree  
 Sum of electronic and zero-point Energies= -3699.633092 Hartree  
 Sum of electronic and thermal Energies= -3699.553596 Hartree  
 Sum of electronic and thermal Enthalpies= -3699.552651 Hartree  
 Sum of electronic and thermal Free Energies= -3699.755624 Hartree  
 The number of Imaginary frequencies = 1

| Center Number | Atomic Number | Atomic Type | Coordinates (Angstroms) |           |           |
|---------------|---------------|-------------|-------------------------|-----------|-----------|
|               |               |             | X                       | Y         | Z         |
| 1             | 6             | 0           | 0.714247                | -5.983435 | 1.723829  |
| 2             | 6             | 0           | -0.453661               | -5.743094 | 0.724394  |
| 3             | 6             | 0           | 1.183588                | -3.992391 | 0.472137  |
| 4             | 6             | 0           | 1.664482                | -4.841523 | 1.476834  |
| 5             | 6             | 0           | 0.681927                | -5.441338 | -1.591636 |
| 6             | 6             | 0           | -0.461111               | -5.506363 | -2.643309 |
| 7             | 6             | 0           | -1.468384               | -4.494282 | -2.167953 |
| 8             | 6             | 0           | -1.060663               | -3.896253 | -0.969524 |
| 9             | 6             | 0           | 0.080776                | -4.680218 | -0.329135 |
| 10            | 6             | 0           | 1.799181                | -2.748649 | 0.292373  |
| 11            | 6             | 0           | 3.039814                | -2.456556 | 0.893527  |
| 12            | 6             | 0           | 3.567297                | -3.418201 | 1.774592  |
| 13            | 6             | 0           | 2.863796                | -4.566548 | 2.125309  |
| 14            | 6             | 0           | -2.659541               | -4.119195 | -2.780834 |
| 15            | 6             | 0           | -3.423819               | -3.111796 | -2.201061 |
| 16            | 6             | 0           | -2.975975               | -2.378945 | -1.086376 |
| 17            | 6             | 0           | -1.753779               | -2.773393 | -0.505870 |
| 18            | 8             | 0           | -1.212577               | -2.052321 | 0.559303  |
| 19            | 8             | 0           | 1.151835                | -1.783771 | -0.488020 |

|     |   |   |            |           |           |
|-----|---|---|------------|-----------|-----------|
| 89  | 1 | 0 | 5.045893   | -3.345230 | -3.225575 |
| 90  | 1 | 0 | 5.795112   | -3.264956 | -1.619224 |
| 91  | 1 | 0 | 6.083929   | -1.977615 | -2.800443 |
| 92  | 1 | 0 | -1.364335  | -7.698290 | 0.856759  |
| 93  | 1 | 0 | -1.783980  | -6.810358 | -0.590733 |
| 94  | 1 | 0 | 1.692916   | -7.261808 | -2.164599 |
| 95  | 1 | 0 | 2.071618   | -6.713757 | -0.547556 |
| 96  | 1 | 0 | -0.282260  | -8.372187 | -1.500942 |
| 97  | 1 | 0 | 0.657812   | -8.521910 | -0.039749 |
| 98  | 6 | 0 | 6.944400   | 1.757330  | -0.023603 |
| 99  | 6 | 0 | -6.939038  | 1.543331  | 0.600166  |
| 100 | 6 | 0 | -9.102214  | 3.232390  | 1.300207  |
| 101 | 6 | 0 | -9.264037  | 2.200892  | 0.371578  |
| 102 | 6 | 0 | -8.211221  | 1.353282  | 0.014048  |
| 103 | 6 | 0 | -6.758065  | 2.577534  | 1.542031  |
| 104 | 6 | 0 | -7.840036  | 3.401870  | 1.871920  |
| 105 | 6 | 0 | -10.264600 | 4.113146  | 1.696229  |
| 106 | 1 | 0 | -10.240299 | 2.044703  | -0.084178 |
| 107 | 6 | 0 | -8.464271  | 0.238746  | -0.978626 |
| 108 | 6 | 0 | -5.413020  | 2.844793  | 2.180765  |
| 109 | 1 | 0 | -7.688074  | 4.199775  | 2.596675  |
| 110 | 6 | 0 | 9.091723   | 3.562624  | -0.397672 |
| 111 | 6 | 0 | 9.316308   | 2.256914  | 0.047208  |
| 112 | 6 | 0 | 8.270631   | 1.348000  | 0.236758  |
| 113 | 6 | 0 | 6.699229   | 3.071037  | -0.468861 |
| 114 | 6 | 0 | 7.773368   | 3.949561  | -0.647287 |
| 115 | 6 | 0 | 10.242270  | 4.515345  | -0.626781 |
| 116 | 1 | 0 | 10.335402  | 1.933710  | 0.252483  |
| 117 | 6 | 0 | 8.577418   | -0.054197 | 0.715195  |
| 118 | 6 | 0 | 5.291300   | 3.548940  | -0.740832 |
| 119 | 1 | 0 | 7.572223   | 4.963225  | -0.989660 |
| 120 | 1 | 0 | -9.530488  | 0.166169  | -1.215107 |
| 121 | 1 | 0 | -8.135023  | -0.730364 | -0.587119 |
| 122 | 1 | 0 | -7.923430  | 0.394810  | -1.919414 |
| 123 | 1 | 0 | -10.941683 | 4.287660  | 0.852681  |
| 124 | 1 | 0 | -9.923056  | 5.086911  | 2.063138  |
| 125 | 1 | 0 | -10.858880 | 3.653654  | 2.497665  |
| 126 | 1 | 0 | -4.942599  | 1.931204  | 2.556520  |
| 127 | 1 | 0 | -5.510535  | 3.544940  | 3.016266  |
| 128 | 1 | 0 | -4.715700  | 3.290823  | 1.460281  |
| 129 | 1 | 0 | 8.095520   | -0.269007 | 1.676111  |
| 130 | 1 | 0 | 9.655568   | -0.196746 | 0.838164  |
| 131 | 1 | 0 | 8.212801   | -0.809475 | 0.009354  |
| 132 | 1 | 0 | 5.296282   | 4.557769  | -1.166440 |
| 133 | 1 | 0 | 4.695540   | 3.574472  | 0.180541  |
| 134 | 1 | 0 | 4.767232   | 2.885193  | -1.437583 |
| 135 | 1 | 0 | 11.048647  | 4.352156  | 0.096762  |
| 136 | 1 | 0 | 9.921005   | 5.559249  | -0.545332 |
| 137 | 1 | 0 | 10.675410  | 4.385340  | -1.627842 |
| 138 | 1 | 0 | -0.781551  | 1.320092  | -0.424627 |
| 139 | 6 | 0 | 0.378872   | 2.820827  | 0.856004  |
| 140 | 8 | 0 | 0.217349   | 4.156924  | 1.006753  |
| 141 | 8 | 0 | -0.929310  | 2.365651  | -0.120451 |
| 142 | 1 | 0 | 0.313204   | 1.175896  | 1.869440  |
| 143 | 6 | 0 | 1.029416   | 4.898142  | 0.036099  |
| 144 | 6 | 0 | 1.553206   | 3.823953  | -0.937795 |
| 145 | 6 | 0 | 1.558011   | 2.559412  | -0.073826 |
| 146 | 1 | 0 | 1.860221   | 5.319542  | 0.613777  |
| 147 | 1 | 0 | 0.870159   | 3.710200  | -1.783618 |
| 148 | 1 | 0 | 2.539798   | 4.085577  | -1.330799 |
| 149 | 1 | 0 | 1.464148   | 1.630510  | -0.635815 |
| 150 | 1 | 0 | 2.455029   | 2.489818  | 0.550860  |
| 151 | 8 | 0 | 0.215474   | 2.180650  | 2.002420  |
| 152 | 6 | 0 | -2.199749  | 2.503510  | 0.557982  |
| 153 | 1 | 0 | -2.976114  | 2.199043  | -0.143600 |
| 154 | 1 | 0 | -2.228531  | 1.875023  | 1.450092  |
| 155 | 1 | 0 | -2.312273  | 3.552999  | 0.831809  |
| 156 | 6 | 0 | 0.229947   | 6.022851  | -0.574670 |
| 157 | 6 | 0 | -0.952225  | 5.768003  | -1.285371 |

|     |   |   |           |          |           |
|-----|---|---|-----------|----------|-----------|
| 158 | 6 | 0 | 0.678426  | 7.341363 | -0.455207 |
| 159 | 6 | 0 | -1.667320 | 6.815893 | -1.862495 |
| 160 | 1 | 0 | -1.311698 | 4.747538 | -1.380340 |
| 161 | 6 | 0 | -0.032285 | 8.391538 | -1.041081 |
| 162 | 1 | 0 | 1.589360  | 7.550195 | 0.102077  |
| 163 | 6 | 0 | -1.207092 | 8.131077 | -1.743957 |
| 164 | 1 | 0 | -2.583185 | 6.606851 | -2.408132 |
| 165 | 1 | 0 | 0.331016  | 9.410804 | -0.940735 |
| 166 | 1 | 0 | -1.764818 | 8.946199 | -2.197871 |

TS-1st-(S)-reaction pathway: S-syn/(S)-1gf (Cy-SPINOL)

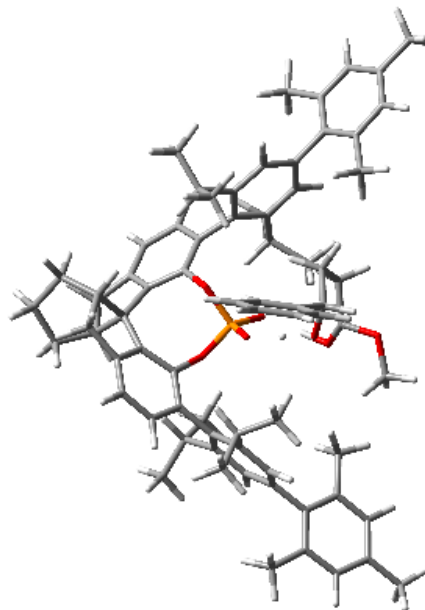

B3LYP/6-31G(d); E(RB3LYP) = -3701.05242453 Hartree  
 Zero-point correction= 1.417893 Hartree  
 Thermal correction to Energy= 1.497568 Hartree  
 Thermal correction to Enthalpy= 1.498512 Hartree  
 Thermal correction to Gibbs Free Energy= 1.295360 Hartree  
 Sum of electronic and zero-point Energies= -3699.634531 Hartree  
 Sum of electronic and thermal Energies= -3699.554857 Hartree  
 Sum of electronic and thermal Enthalpies= -3699.553913 Hartree  
 Sum of electronic and thermal Free Energies= -3699.757064 Hartree  
 The number of Imaginary frequencies = 1

| Center Number | Atomic Number | Atomic Type | Coordinates (Angstroms) |          |           |
|---------------|---------------|-------------|-------------------------|----------|-----------|
|               |               |             | X                       | Y        | Z         |
| 1             | 6             | 0           | 0.352344                | 5.560342 | -2.178560 |
| 2             | 6             | 0           | -0.760410               | 5.358512 | -1.114805 |
| 3             | 6             | 0           | 0.914749                | 3.641222 | -0.849846 |
| 4             | 6             | 0           | 1.303083                | 4.417559 | -1.949622 |
| 5             | 6             | 0           | 0.425227                | 5.170241 | 1.188410  |
| 6             | 6             | 0           | -0.727021               | 5.280109 | 2.232420  |
| 7             | 6             | 0           | -1.737411               | 4.251165 | 1.792964  |
| 8             | 6             | 0           | -1.293500               | 3.576911 | 0.648654  |
| 9             | 6             | 0           | -0.167943               | 4.348685 | -0.033662 |
| 10            | 6             | 0           | 1.566585                | 2.421930 | -0.629170 |
| 11            | 6             | 0           | 2.727412                | 2.070485 | -1.345687 |
| 12            | 6             | 0           | 3.153150                | 2.950778 | -2.356313 |
| 13            | 6             | 0           | 2.425764                | 4.085335 | -2.700552 |
| 14            | 6             | 0           | -2.950911               | 3.914317 | 2.385303  |
| 15            | 6             | 0           | -3.706585               | 2.877866 | 1.838145  |
| 16            | 6             | 0           | -3.216995               | 2.069235 | 0.798061  |



|    |    |   |           |           |           |     |   |   |           |           |           |
|----|----|---|-----------|-----------|-----------|-----|---|---|-----------|-----------|-----------|
| 17 | 6  | 0 | -1.961800 | 2.415345  | 0.259419  | 86  | 1 | 0 | 3.979215  | 2.130472  | 3.317629  |
| 18 | 8  | 0 | -1.354436 | 1.573615  | -0.677380 | 87  | 1 | 0 | 3.138714  | 0.750441  | 2.590887  |
| 19 | 8  | 0 | 1.041253  | 1.546060  | 0.326180  | 88  | 1 | 0 | 4.883656  | 0.671184  | 2.897061  |
| 20 | 15 | 0 | -0.188202 | 0.559004  | -0.140401 | 89  | 1 | 0 | 5.502437  | 3.605983  | 1.920339  |
| 21 | 8  | 0 | 0.197170  | -0.324994 | -1.294441 | 90  | 1 | 0 | 5.745450  | 3.269520  | 0.195190  |
| 22 | 8  | 0 | -0.625889 | -0.108567 | 1.164444  | 91  | 1 | 0 | 6.487751  | 2.222857  | 1.415811  |
| 23 | 6  | 0 | 3.593449  | 0.871243  | -1.070571 | 92  | 1 | 0 | -1.677842 | 7.301846  | -1.317649 |
| 24 | 6  | 0 | -4.027833 | 0.919294  | 0.274430  | 93  | 1 | 0 | -2.060894 | 6.487044  | 0.180962  |
| 25 | 6  | 0 | -4.464865 | 0.924030  | -1.076579 | 94  | 1 | 0 | 1.441213  | 7.019957  | 1.658531  |
| 26 | 6  | 0 | -5.224719 | -0.149755 | -1.551905 | 95  | 1 | 0 | 1.794762  | 6.393176  | 0.063811  |
| 27 | 6  | 0 | -5.580293 | -1.228194 | -0.740327 | 96  | 1 | 0 | -0.541430 | 8.098710  | 0.971308  |
| 28 | 6  | 0 | -5.172843 | -1.199251 | 0.595031  | 97  | 1 | 0 | 0.367566  | 8.166607  | -0.515293 |
| 29 | 6  | 0 | -4.408381 | -0.153228 | 1.125133  | 98  | 6 | 0 | -6.368320 | -2.379747 | -1.283995 |
| 30 | 6  | 0 | 3.756556  | -0.136278 | -2.057478 | 99  | 6 | 0 | 6.754960  | -2.064775 | -0.675446 |
| 31 | 6  | 0 | 4.755565  | -1.102541 | -1.878721 | 100 | 6 | 0 | -7.844674 | -4.567156 | -2.300001 |
| 32 | 6  | 0 | 5.601742  | -1.108925 | -0.766036 | 101 | 6 | 0 | -8.452248 | -3.599754 | -1.495224 |
| 33 | 6  | 0 | 5.385827  | -0.143073 | 0.220492  | 102 | 6 | 0 | -7.740685 | -2.510323 | -0.982537 |
| 34 | 6  | 0 | 4.404055  | 0.848008  | 0.092479  | 103 | 6 | 0 | -5.736388 | -3.343898 | -2.097861 |
| 35 | 6  | 0 | -4.047375 | -0.219580 | 2.611350  | 104 | 6 | 0 | -6.485074 | -4.420889 | -2.585317 |
| 36 | 6  | 0 | -5.271430 | 0.105908  | 3.494229  | 105 | 6 | 0 | -8.640846 | -5.720024 | -2.866968 |
| 37 | 6  | 0 | -3.466666 | -1.582096 | 3.032795  | 106 | 1 | 0 | -9.511158 | -3.692849 | -1.259798 |
| 38 | 6  | 0 | -4.204014 | 2.081504  | -2.042387 | 107 | 6 | 0 | -8.456671 | -1.487944 | -0.126492 |
| 39 | 6  | 0 | -3.444744 | 1.631174  | -3.304913 | 108 | 6 | 0 | -4.268551 | -3.236716 | -2.451731 |
| 40 | 6  | 0 | -5.519869 | 2.796580  | -2.411773 | 109 | 1 | 0 | -5.989331 | -5.166303 | -3.205066 |
| 41 | 6  | 0 | 2.927441  | -0.185288 | -3.344484 | 110 | 6 | 0 | 8.960526  | -3.832680 | -0.523003 |
| 42 | 6  | 0 | 3.779561  | 0.180577  | -4.578194 | 111 | 6 | 0 | 9.027179  | -2.660195 | -1.279985 |
| 43 | 6  | 0 | 2.256635  | -1.553802 | -3.568569 | 112 | 6 | 0 | 7.949405  | -1.773387 | -1.370422 |
| 44 | 6  | 0 | 4.325784  | 1.923096  | 1.177588  | 113 | 6 | 0 | 6.673217  | -3.238544 | 0.100329  |
| 45 | 6  | 0 | 4.068184  | 1.329014  | 2.574171  | 114 | 6 | 0 | 7.773745  | -4.099774 | 0.163155  |
| 46 | 6  | 0 | 5.590512  | 2.805470  | 1.175577  | 115 | 6 | 0 | 10.126979 | -4.791892 | -0.467758 |
| 47 | 6  | 0 | -1.242319 | 6.686956  | -0.519672 | 116 | 1 | 0 | 9.946074  | -2.424326 | -1.813933 |
| 48 | 6  | 0 | 0.981689  | 6.540960  | 0.784585  | 117 | 6 | 0 | 8.090344  | -0.513546 | -2.196894 |
| 49 | 6  | 0 | -0.105766 | 7.469660  | 0.186183  | 118 | 6 | 0 | 5.413201  | -3.583389 | 0.860377  |
| 50 | 1  | 0 | -0.059858 | 5.537948  | -3.195443 | 119 | 1 | 0 | 7.699432  | -5.003478 | 0.765585  |
| 51 | 1  | 0 | 0.850575  | 6.532030  | -2.074923 | 120 | 1 | 0 | -8.294897 | -0.469478 | -0.497327 |
| 52 | 1  | 0 | -1.607691 | 4.852926  | -1.592801 | 121 | 1 | 0 | -8.101701 | -1.501275 | 0.910927  |
| 53 | 1  | 0 | 1.232035  | 4.567293  | 1.621523  | 122 | 1 | 0 | -9.534462 | -1.678850 | -0.112702 |
| 54 | 1  | 0 | -0.363022 | 5.063321  | 3.245138  | 123 | 1 | 0 | -3.644496 | -3.029769 | -1.575873 |
| 55 | 1  | 0 | -1.152368 | 6.289571  | 2.274892  | 124 | 1 | 0 | -4.081037 | -2.420357 | -3.159929 |
| 56 | 1  | 0 | 4.063900  | 2.710675  | -2.895267 | 125 | 1 | 0 | -3.913859 | -4.162247 | -2.917488 |
| 57 | 1  | 0 | 2.738635  | 4.705604  | -3.536835 | 126 | 1 | 0 | -9.453037 | -6.016705 | -2.194192 |
| 58 | 1  | 0 | -3.317286 | 4.458293  | 3.252560  | 127 | 1 | 0 | -8.008236 | -6.597238 | -3.041092 |
| 59 | 1  | 0 | -4.685895 | 2.656555  | 2.248230  | 128 | 1 | 0 | -9.098869 | -5.454584 | -3.829562 |
| 60 | 1  | 0 | -5.559889 | -0.145440 | -2.585761 | 129 | 1 | 0 | 10.136237 | -5.358995 | 0.469321  |
| 61 | 1  | 0 | -5.453467 | -2.028553 | 1.238254  | 130 | 1 | 0 | 11.083825 | -4.265484 | -0.554275 |
| 62 | 1  | 0 | 4.905850  | -1.856802 | -2.646876 | 131 | 1 | 0 | 10.083585 | -5.521124 | -1.288144 |
| 63 | 1  | 0 | 6.038059  | -0.134545 | 1.090325  | 132 | 1 | 0 | 5.165651  | -2.816207 | 1.603185  |
| 64 | 1  | 0 | -3.275310 | 0.528758  | 2.807733  | 133 | 1 | 0 | 5.520520  | -4.538900 | 1.383685  |
| 65 | 1  | 0 | -4.990388 | 0.107785  | 4.554620  | 134 | 1 | 0 | 4.551560  | -3.659458 | 0.187182  |
| 66 | 1  | 0 | -5.709448 | 1.081423  | 3.258782  | 135 | 1 | 0 | 9.107028  | -0.419158 | -2.591068 |
| 67 | 1  | 0 | -6.058656 | -0.645970 | 3.358715  | 136 | 1 | 0 | 7.869347  | 0.382697  | -1.605886 |
| 68 | 1  | 0 | -3.100288 | -1.527965 | 4.064698  | 137 | 1 | 0 | 7.397809  | -0.504160 | -3.046675 |
| 69 | 1  | 0 | -2.631774 | -1.876652 | 2.394672  | 138 | 1 | 0 | -0.527599 | -1.381845 | 1.355764  |
| 70 | 1  | 0 | -4.221832 | -2.376881 | 2.998026  | 139 | 6 | 0 | 0.095969  | -3.278993 | 0.174936  |
| 71 | 1  | 0 | -3.578803 | 2.820633  | -1.536406 | 140 | 8 | 0 | -0.445542 | -2.508466 | 1.556305  |
| 72 | 1  | 0 | -4.037978 | 0.931005  | -3.905312 | 141 | 6 | 0 | 0.590366  | -2.841113 | 2.539965  |
| 73 | 1  | 0 | -3.219394 | 2.496737  | -3.940357 | 142 | 6 | 0 | 1.607786  | -3.044687 | 0.319447  |
| 74 | 1  | 0 | -2.501603 | 1.144245  | -3.041800 | 143 | 1 | 0 | 2.108421  | -3.982678 | 0.063534  |
| 75 | 1  | 0 | -6.039039 | 3.159118  | -1.517313 | 144 | 1 | 0 | 1.921729  | -2.285178 | -0.397501 |
| 76 | 1  | 0 | -6.204763 | 2.128840  | -2.947498 | 145 | 8 | 0 | -0.580831 | -2.759134 | -0.841383 |
| 77 | 1  | 0 | -5.318568 | 3.657694  | -3.060983 | 146 | 8 | 0 | -0.206436 | -4.581317 | 0.401994  |
| 78 | 1  | 0 | 2.123322  | 0.549324  | -3.255601 | 147 | 6 | 0 | -1.581487 | -4.960537 | 0.211507  |
| 79 | 1  | 0 | 3.158563  | 0.185181  | -5.482130 | 148 | 1 | 0 | -1.642182 | -5.997532 | 0.543708  |
| 80 | 1  | 0 | 4.240462  | 1.168976  | -4.482927 | 149 | 1 | 0 | -1.858767 | -4.882368 | -0.842417 |
| 81 | 1  | 0 | 4.585535  | -0.547354 | -4.732567 | 150 | 1 | 0 | -2.239171 | -4.329753 | 0.815232  |
| 82 | 1  | 0 | 1.651030  | -1.524095 | -4.482265 | 151 | 1 | 0 | -0.266793 | -1.825223 | -1.081209 |
| 83 | 1  | 0 | 1.592275  | -1.806723 | -2.740488 | 152 | 6 | 0 | 0.416292  | -2.137715 | 3.865611  |
| 84 | 1  | 0 | 2.992132  | -2.358090 | -3.690140 | 153 | 6 | 0 | 0.503308  | -0.744584 | 4.003512  |
| 85 | 1  | 0 | 3.482233  | 2.578636  | 0.950789  | 154 | 6 | 0 | 0.194992  | -2.917288 | 5.008121  |

|     |   |   |           |           |          |
|-----|---|---|-----------|-----------|----------|
| 155 | 6 | 0 | 0.366478  | -0.154538 | 5.259493 |
| 156 | 1 | 0 | 0.638702  | -0.118602 | 3.129450 |
| 157 | 6 | 0 | 0.068224  | -2.327485 | 6.265744 |
| 158 | 1 | 0 | 0.122759  | -3.99059  | 4.912385 |
| 159 | 6 | 0 | 0.153437  | -0.941107 | 6.394202 |
| 160 | 1 | 0 | 0.426510  | 0.926819  | 5.350760 |
| 161 | 1 | 0 | -0.100866 | -2.948596 | 7.141168 |
| 162 | 1 | 0 | 0.051165  | -0.474503 | 7.370195 |
| 163 | 1 | 0 | 0.460795  | -3.914083 | 2.700612 |
| 164 | 6 | 0 | 1.897513  | -2.599622 | 1.771864 |
| 165 | 1 | 0 | 2.725727  | -3.150350 | 2.227374 |
| 166 | 1 | 0 | 2.158854  | -1.537947 | 1.797150 |

TS-2nd-(S)-reaction pathway: S-re/(S)-Igf (Cy-SPINOL)

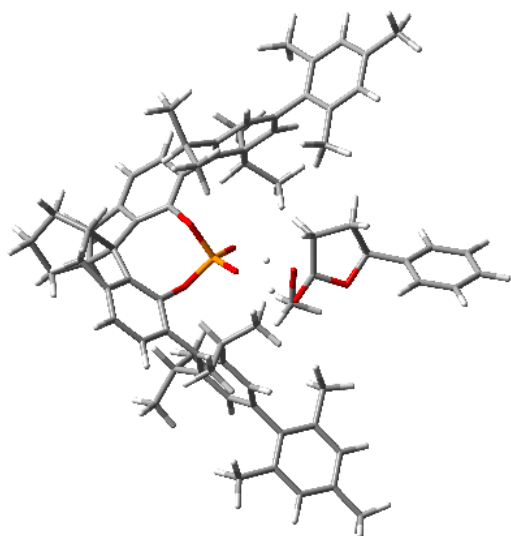

B3LYP/6-31G(d); E(RB3LYP) = -3701.05603065 Hartree  
 Zero-point correction= 1.419147 Hartree  
 Thermal correction to Energy= 1.498874 Hartree  
 Thermal correction to Enthalpy= 1.499818 Hartree  
 Thermal correction to Gibbs Free Energy= 1.295903 Hartree  
 Sum of electronic and zero-point Energies= -3699.636884 Hartree  
 Sum of electronic and thermal Energies= -3699.557157 Hartree  
 Sum of electronic and thermal Enthalpies= -3699.556212 Hartree  
 Sum of electronic and thermal Free Energies= -3699.760128 Hartree  
 The number of Imaginary frequencies = 1

| Center Number | Atomic Number | Atomic Type | Coordinates (Angstroms) |           |           |
|---------------|---------------|-------------|-------------------------|-----------|-----------|
|               |               |             | X                       | Y         | Z         |
| 1             | 6             | 0           | 0.705508                | -6.098982 | 1.957878  |
| 2             | 6             | 0           | -0.449488               | -5.914470 | 0.934396  |
| 3             | 6             | 0           | 1.210793                | -4.203819 | 0.577046  |
| 4             | 6             | 0           | 1.648500                | -4.962430 | 1.669615  |
| 5             | 6             | 0           | 0.662838                | -5.772654 | -1.407195 |
| 6             | 6             | 0           | -0.514007               | -5.903185 | -2.417907 |
| 7             | 6             | 0           | -1.507049               | -4.857970 | -1.980610 |
| 8             | 6             | 0           | -1.042317               | -4.164134 | -0.855160 |
| 9             | 6             | 0           | 0.101862                | -4.926035 | -0.186403 |
| 10            | 6             | 0           | 1.837326                | -2.980971 | 0.316647  |
| 11            | 6             | 0           | 3.009164                | -2.594016 | 0.996477  |
| 12            | 6             | 0           | 3.494275                | -3.465497 | 1.987729  |
| 13            | 6             | 0           | 2.801883                | -4.612291 | 2.364810  |
| 14            | 6             | 0           | -2.721934               | -4.525152 | -2.571472 |
| 15            | 6             | 0           | -3.460074               | -3.466130 | -2.047071 |
| 16            | 6             | 0           | -2.951246               | -2.640478 | -1.030474 |
| 17            | 6             | 0           | -1.699460               | -2.987292 | -0.484073 |
| 18            | 8             | 0           | -1.088536               | -2.125714 | 0.431756  |

|    |    |   |           |           |           |
|----|----|---|-----------|-----------|-----------|
| 19 | 8  | 0 | 1.269851  | -2.137354 | -0.638607 |
| 20 | 15 | 0 | 0.069132  | -1.122709 | -0.155623 |
| 21 | 8  | 0 | 0.503075  | -0.244925 | 0.991406  |
| 22 | 8  | 0 | -0.396360 | -0.457139 | -1.444611 |
| 23 | 6  | 0 | 3.768423  | -1.327400 | 0.720378  |
| 24 | 6  | 0 | -3.762039 | -1.472204 | -0.547020 |
| 25 | 6  | 0 | -4.266394 | -1.465449 | 0.779310  |
| 26 | 6  | 0 | -5.094406 | -0.415048 | 1.190205  |
| 27 | 6  | 0 | -5.448009 | 0.634963  | 0.340264  |
| 28 | 6  | 0 | -4.937967 | 0.614093  | -0.961368 |
| 29 | 6  | 0 | -4.111206 | -0.414758 | -1.429835 |
| 30 | 6  | 0 | 3.937848  | -0.360926 | 1.748791  |
| 31 | 6  | 0 | 4.763005  | 0.743917  | 1.508811  |
| 32 | 6  | 0 | 5.426826  | 0.935731  | 0.294621  |
| 33 | 6  | 0 | 5.225862  | -0.010508 | -0.712966 |
| 34 | 6  | 0 | 4.419340  | -1.140873 | -0.525377 |
| 35 | 6  | 0 | -3.669696 | -0.366084 | -2.896022 |
| 36 | 6  | 0 | -4.854419 | -0.667157 | -3.839113 |
| 37 | 6  | 0 | -3.028261 | 0.975039  | -3.296584 |
| 38 | 6  | 0 | -4.001666 | -2.588589 | 1.783181  |
| 39 | 6  | 0 | -3.270537 | -2.077406 | 3.039228  |
| 40 | 6  | 0 | -5.304532 | -3.323985 | 2.156858  |
| 41 | 6  | 0 | 3.299815  | -0.482242 | 3.137015  |
| 42 | 6  | 0 | 4.367526  | -0.758434 | 4.217001  |
| 43 | 6  | 0 | 2.471632  | 0.755915  | 3.530740  |
| 44 | 6  | 0 | 4.348818  | -2.163087 | -1.661104 |
| 45 | 6  | 0 | 3.734631  | -1.566988 | -2.941490 |
| 46 | 6  | 0 | 5.733071  | -2.780514 | -1.945132 |
| 47 | 6  | 0 | -0.953179 | -7.253290 | 0.381825  |
| 48 | 6  | 0 | 1.229741  | -7.135899 | -0.992875 |
| 49 | 6  | 0 | 0.159086  | -8.051295 | -0.345554 |
| 50 | 1  | 0 | 0.333156  | -6.053713 | 2.989367  |
| 51 | 1  | 0 | 1.195123  | -7.075064 | 1.855721  |
| 52 | 1  | 0 | -1.277490 | -5.399757 | 1.436060  |
| 53 | 1  | 0 | 1.457649  | -5.178145 | -1.872591 |
| 54 | 1  | 0 | -0.175467 | -5.714770 | -3.444908 |
| 55 | 1  | 0 | -0.946704 | -6.910515 | -2.422535 |
| 56 | 1  | 0 | 4.416228  | -3.203227 | 2.496443  |
| 57 | 1  | 0 | 3.159649  | -5.221759 | 3.191081  |
| 58 | 1  | 0 | -3.098743 | -5.086720 | -3.422856 |
| 59 | 1  | 0 | -4.438472 | -3.238917 | -2.457249 |
| 60 | 1  | 0 | -5.498029 | -0.424536 | 2.199164  |
| 61 | 1  | 0 | -5.206998 | 1.423753  | -1.634501 |
| 62 | 1  | 0 | 4.908898  | 1.477178  | 2.297594  |
| 63 | 1  | 0 | 5.745473  | 0.119702  | -1.659175 |
| 64 | 1  | 0 | -2.909129 | -1.135748 | -3.046890 |
| 65 | 1  | 0 | -4.516623 | -0.698763 | -4.882240 |
| 66 | 1  | 0 | -5.332617 | -1.625024 | -3.610290 |
| 67 | 1  | 0 | -5.625088 | 0.109732  | -3.761580 |
| 68 | 1  | 0 | -2.701541 | 0.931182  | -4.342850 |
| 69 | 1  | 0 | -2.152291 | 1.197225  | -2.684438 |
| 70 | 1  | 0 | -3.732863 | 1.811306  | -3.213054 |
| 71 | 1  | 0 | -3.350694 | -3.326896 | 1.309902  |
| 72 | 1  | 0 | -3.882300 | -1.358201 | 3.597538  |
| 73 | 1  | 0 | -3.047310 | -2.912364 | 3.714869  |
| 74 | 1  | 0 | -2.327159 | -1.592938 | 2.771650  |
| 75 | 1  | 0 | -5.803562 | -3.723789 | 1.266867  |
| 76 | 1  | 0 | -6.012906 | -2.660990 | 2.667318  |
| 77 | 1  | 0 | -5.089511 | -4.161917 | 2.831226  |
| 78 | 1  | 0 | 2.609633  | -1.328833 | 3.122510  |
| 79 | 1  | 0 | 3.892986  | -0.909443 | 5.194296  |
| 80 | 1  | 0 | 4.963287  | -1.649137 | 3.990249  |
| 81 | 1  | 0 | 5.061767  | 0.085357  | 4.311619  |
| 82 | 1  | 0 | 2.038740  | 0.608411  | 4.527945  |
| 83 | 1  | 0 | 1.651637  | 0.915802  | 2.829240  |
| 84 | 1  | 0 | 3.082041  | 1.665658  | 3.569216  |
| 85 | 1  | 0 | 3.698654  | -2.982042 | -1.345401 |
| 86 | 1  | 0 | 3.672513  | -2.331022 | -3.726271 |
| 87 | 1  | 0 | 2.722981  | -1.196733 | -2.750037 |

|     |   |   |           |           |           |     |   |   |           |          |           |
|-----|---|---|-----------|-----------|-----------|-----|---|---|-----------|----------|-----------|
| 88  | 1 | 0 | 4.340821  | -0.741012 | -3.333483 | 157 | 6 | 0 | -1.186026 | 6.951523 | -1.697448 |
| 89  | 1 | 0 | 5.654757  | -3.557410 | -2.715600 | 158 | 6 | 0 | 0.180460  | 6.655125 | 0.271768  |
| 90  | 1 | 0 | 6.154205  | -3.238279 | -1.042987 | 159 | 6 | 0 | -1.102661 | 8.336988 | -1.550947 |
| 91  | 1 | 0 | 6.446875  | -2.029105 | -2.302639 | 160 | 1 | 0 | -1.745852 | 6.528245 | -2.529409 |
| 92  | 1 | 0 | -1.363049 | -7.852091 | 1.205271  | 161 | 6 | 0 | 0.272459  | 8.038963 | 0.411959  |
| 93  | 1 | 0 | -1.793986 | -7.065416 | -0.295704 | 162 | 1 | 0 | 0.692525  | 5.999208 | 0.968840  |
| 94  | 1 | 0 | 1.662400  | -7.632011 | -1.871002 | 163 | 6 | 0 | -0.372686 | 8.883793 | -0.495799 |
| 95  | 1 | 0 | 2.064108  | -6.976068 | -0.299798 | 164 | 1 | 0 | -1.600832 | 8.986171 | -2.265785 |
| 96  | 1 | 0 | -0.302004 | -8.692353 | -1.106089 | 165 | 1 | 0 | 0.850549  | 8.460026 | 1.230336  |
| 97  | 1 | 0 | 0.652113  | -8.737628 | 0.352828  | 166 | 1 | 0 | -0.300088 | 9.961906 | -0.383068 |
| 98  | 6 | 0 | 6.372786  | 2.085407  | 0.110898  |     |   |   |           |          |           |
| 99  | 6 | 0 | -6.364152 | 1.728017  | 0.798743  |     |   |   |           |          |           |
| 100 | 6 | 0 | -8.101720 | 3.796578  | 1.650454  |     |   |   |           |          |           |
| 101 | 6 | 0 | -6.807599 | 3.685668  | 2.162265  |     |   |   |           |          |           |
| 102 | 6 | 0 | -5.935785 | 2.666846  | 1.761752  |     |   |   |           |          |           |
| 103 | 6 | 0 | -7.672193 | 1.822409  | 0.271665  |     |   |   |           |          |           |
| 104 | 6 | 0 | -8.512704 | 2.851718  | 0.706479  |     |   |   |           |          |           |
| 105 | 6 | 0 | -9.038799 | 4.884054  | 2.122772  |     |   |   |           |          |           |
| 106 | 1 | 0 | -6.462317 | 4.412749  | 2.895376  |     |   |   |           |          |           |
| 107 | 6 | 0 | -4.552851 | 2.602559  | 2.373588  |     |   |   |           |          |           |
| 108 | 6 | 0 | -8.195030 | 0.821874  | -0.737373 |     |   |   |           |          |           |
| 109 | 1 | 0 | -9.519688 | 2.913665  | 0.297263  |     |   |   |           |          |           |
| 110 | 6 | 0 | 8.180140  | 4.240451  | -0.192192 |     |   |   |           |          |           |
| 111 | 6 | 0 | 6.850693  | 4.351002  | -0.604146 |     |   |   |           |          |           |
| 112 | 6 | 0 | 5.940919  | 3.295982  | -0.467174 |     |   |   |           |          |           |
| 113 | 6 | 0 | 7.712811  | 1.954633  | 0.537277  |     |   |   |           |          |           |
| 114 | 6 | 0 | 8.589700  | 3.031887  | 0.378105  |     |   |   |           |          |           |
| 115 | 6 | 0 | 9.153302  | 5.381817  | -0.378397 |     |   |   |           |          |           |
| 116 | 1 | 0 | 6.506501  | 5.285460  | -1.044225 |     |   |   |           |          |           |
| 117 | 6 | 0 | 4.520070  | 3.470718  | -0.952723 |     |   |   |           |          |           |
| 118 | 6 | 0 | 8.213354  | 0.671246  | 1.163639  |     |   |   |           |          |           |
| 119 | 1 | 0 | 9.620305  | 2.923616  | 0.712048  |     |   |   |           |          |           |
| 120 | 1 | 0 | 9.887635  | 5.420260  | 0.433950  |     |   |   |           |          |           |
| 121 | 1 | 0 | 8.636956  | 6.347156  | -0.413371 |     |   |   |           |          |           |
| 122 | 1 | 0 | 9.715302  | 5.279515  | -1.316779 |     |   |   |           |          |           |
| 123 | 1 | 0 | 4.346580  | 2.897452  | -1.873027 |     |   |   |           |          |           |
| 124 | 1 | 0 | 4.309847  | 4.521704  | -1.176211 |     |   |   |           |          |           |
| 125 | 1 | 0 | 3.783192  | 3.122434  | -0.222949 |     |   |   |           |          |           |
| 126 | 1 | 0 | 7.682208  | 0.439804  | 2.094386  |     |   |   |           |          |           |
| 127 | 1 | 0 | 9.281472  | 0.740340  | 1.392710  |     |   |   |           |          |           |
| 128 | 1 | 0 | 8.062926  | -0.187550 | 0.499157  |     |   |   |           |          |           |
| 129 | 1 | 0 | -7.980177 | -0.207783 | -0.431998 |     |   |   |           |          |           |
| 130 | 1 | 0 | -7.740628 | 0.956209  | -1.726333 |     |   |   |           |          |           |
| 131 | 1 | 0 | -9.278418 | 0.924471  | -0.855913 |     |   |   |           |          |           |
| 132 | 1 | 0 | -4.482924 | 1.822286  | 3.141797  |     |   |   |           |          |           |
| 133 | 1 | 0 | -4.295442 | 3.554073  | 2.850514  |     |   |   |           |          |           |
| 134 | 1 | 0 | -3.788041 | 2.370751  | 1.626311  |     |   |   |           |          |           |
| 135 | 1 | 0 | -9.702038 | 5.220486  | 1.318164  |     |   |   |           |          |           |
| 136 | 1 | 0 | -8.487755 | 5.754972  | 2.493520  |     |   |   |           |          |           |
| 137 | 1 | 0 | -9.679063 | 4.531249  | 2.942667  |     |   |   |           |          |           |
| 138 | 1 | 0 | -0.063914 | 0.860425  | -1.661062 |     |   |   |           |          |           |
| 139 | 6 | 0 | 0.313879  | 2.667124  | -0.283214 |     |   |   |           |          |           |
| 140 | 8 | 0 | 0.559006  | 3.952060  | -0.618514 |     |   |   |           |          |           |
| 141 | 8 | 0 | 0.192715  | 1.900010  | -1.837014 |     |   |   |           |          |           |
| 142 | 6 | 0 | -0.706810 | 4.608151  | -0.924293 |     |   |   |           |          |           |
| 143 | 6 | 0 | -1.695276 | 3.935891  | 0.051717  |     |   |   |           |          |           |
| 144 | 6 | 0 | -1.125422 | 2.514484  | 0.225123  |     |   |   |           |          |           |
| 145 | 1 | 0 | -0.968144 | 4.351273  | -1.958408 |     |   |   |           |          |           |
| 146 | 1 | 0 | -1.690486 | 4.479139  | 1.001702  |     |   |   |           |          |           |
| 147 | 1 | 0 | -2.715428 | 3.945405  | -0.338267 |     |   |   |           |          |           |
| 148 | 1 | 0 | -1.099339 | 2.183919  | 1.265785  |     |   |   |           |          |           |
| 149 | 1 | 0 | -1.677041 | 1.763721  | -0.342385 |     |   |   |           |          |           |
| 150 | 8 | 0 | 1.338889  | 2.110950  | 0.320752  |     |   |   |           |          |           |
| 151 | 6 | 0 | 1.416081  | 1.951513  | -2.598928 |     |   |   |           |          |           |
| 152 | 1 | 0 | 2.239122  | 1.491519  | -2.044927 |     |   |   |           |          |           |
| 153 | 1 | 0 | 1.239635  | 1.415142  | -3.533107 |     |   |   |           |          |           |
| 154 | 1 | 0 | 1.638756  | 3.000464  | -2.801887 |     |   |   |           |          |           |
| 155 | 1 | 0 | 1.085913  | 1.174023  | 0.639757  |     |   |   |           |          |           |
| 156 | 6 | 0 | -0.551674 | 6.100008  | -0.786252 |     |   |   |           |          |           |
